# Supplementary material for: Enantioselective Ni-catalyzed syn -hydrometalative cyclization of alkyne-tethered ketoamides to α-hydroxy-γ-lactams
Source: Royal Society of Chemistry journal article supplement (doi:10.1039/d3qo00670k), 2023-01-01
Supplement: d3qo00670k1.pdf [file d3qo00670k1.pdf]

*Supporting Information for*

## **Enantioselective Ni-catalyzed *Syn*-Hydrometalative Cyclization of Alkyne-tethered Ketoamides to $\alpha$ -Hydroxy- $\gamma$ -Lactams**

Hai-Xiang Zeng,<sup>†</sup> Xiao-Wen Zhang,<sup>†</sup> Qi-Yang Li, and Wen-Bo Liu<sup>\*</sup>

Sauvage Center for Molecular Sciences, Engineering Research Center of Organosilicon Compounds & Materials (Ministry of Education), and College of Chemistry and Molecular Sciences, Wuhan University, Wuhan 430072, Hubei, China

<sup>†</sup>These authors contributed equally

<sup>\*</sup>E-mail: wenbolu@whu.edu.cn

### **Table of Contents**

|                                                                                                                                                                                                                             |           |
|-----------------------------------------------------------------------------------------------------------------------------------------------------------------------------------------------------------------------------|-----------|
| <b>I. General Information .....</b>                                                                                                                                                                                         | <b>1</b>  |
| <b>II. Optimization of Reaction Conditions (Tables S1–S9).....</b>                                                                                                                                                          | <b>1</b>  |
| <b>Scheme S1. Unsuccessful Substrates .....</b>                                                                                                                                                                             | <b>6</b>  |
| <b>III. General Procedures for Preparation of Substrates 1 .....</b>                                                                                                                                                        | <b>7</b>  |
| <b>IV. General Procedures for Synthesis of <math>\alpha</math>-Hydroxy-<math>\gamma</math>-Lactams by Ni-catalyzed <i>Syn</i>-Hydrometalative Cyclization of Alkyne-tethered Ketoamides and Characterization Data .....</b> | <b>27</b> |
| <b>V. Mechanistic Experiments.....</b>                                                                                                                                                                                      | <b>44</b> |
| <b>VI. Gram-Scale Synthesis and Procedures of Product Derivatizations .....</b>                                                                                                                                             | <b>46</b> |
| <b>VII. X-ray Crystallography Data of 2b.....</b>                                                                                                                                                                           | <b>50</b> |
| <b>VIII. References .....</b>                                                                                                                                                                                               | <b>64</b> |
| <b>IX. HPLC Spectra .....</b>                                                                                                                                                                                               | <b>65</b> |
| <b>X. NMR Spectra .....</b>                                                                                                                                                                                                 | <b>94</b> |

## I. General Information

Unless otherwise stated, all experiments were carried out in oven-dried glassware using argon manifolds or in a glovebox. Reactions were monitored by thin-layer chromatography (TLC). TLC was performed using Huanghai  $8 \pm 0.2 \mu\text{m}$  pre-coated glass plates (0.25 mm) and visualized by UV fluorescence quenching,  $\text{KMnO}_4$ , *p*-anisaldehyde or phosphomolybdic acid staining. Huanghai silica gel (particle size 300 – 400 or 200 – 300 mesh) was used for chromatography.  $^1\text{H}$  NMR spectra were recorded at room temperature on a Bruker AVANCE NEO 400 MHz Digital NMR spectrometer and were reported relative to residual  $\text{CDCl}_3$  ( $\delta$  7.26 ppm).  $^{13}\text{C}$  NMR spectra were recorded on a Bruker AVANCE NEO 400 MHz Digital NMR spectrometer (100 MHz) and were reported relative to  $\text{CDCl}_3$  ( $\delta$  77.16 ppm). Data for  $^1\text{H}$  NMR were reported as follows: chemical shift ( $\delta$  ppm) (multiplicity, coupling constant (Hz), integration). Multiplicities were reported as follows: s = singlet, d = doublet, t = triplet, q = quartet, m = multiplet. Data for  $^{13}\text{C}$  NMR and  $^{31}\text{P}$  NMR were reported in terms of chemical shifts ( $\delta$  ppm). The regioselectivity was determined by  $^1\text{H}$  NMR of the crude mixture, while the relaxation delay (d1) was set as 10 s. High resolution mass spectra (HRMS) were obtained by use of a Bruker Compact TOF mass spectrometer or a Thermo Scientific Quadrupole-Orbitrap Mass Spectrometer in electrospray ionization mode ( $\text{ESI}^+$ ). Single crystal diffraction data were collected using a Rigaku XtaLAB AFC11 diffractometer. Enantiomeric ratio (er) was determined by an Agilent 1260 Series HPLC utilizing DAICEL Chiralpak (AD-H, IB, AS-H or IC) or Chiralcel (OD-H, OJ-H) columns (4.6 mm x 250 mm). Optical rotations were measured with a Perkin Elmer 343 Polarimeter and were reported as:  $[\alpha]_{\text{D}}^{\text{T}}$  (concentration in g/100 mL, solvent).

Unless otherwise noted, all chemicals were purchased from Strem, Alfa Aesar, Adamas-beta, TCI, J&K, and Energy, and used as received. Petroleum ether (PE, 60 ~ 90 °C) was used as eluent for silica gel chromatography. Dry solvents were purchased commercially or were dried by passage through an activated alumina column under argon.

## II. Optimization of Reaction Conditions (Tables S1–S9)

**General procedure for condition optimization:** To a resealable Schlenk tube equipped with

a magnetic stirring bar were added [Ni] (0.01 mmol, 10 mol %), ligand (0.012 mmol, 12 mol %), and 0.5 mL of solvent in a glovebox. After the resultant mixture was stirred at room temperature for 20 min, (EtO)<sub>2</sub>MeSiH (32  $\mu$ L, 0.2 mmol, 2.0 equiv) was added and the mixture was stirred at room temperature for an additional 10 min. Substrate **1a** (41.7 mg, 0.1 mmol, 1.0 equiv) or substrate **1b** (49.5 mg, 0.1 mmol, 1.0 equiv) and another 0.5 mL of solvent were added. The tube was sealed with a Teflon valve, removed from the glovebox, and stirred at the indicated temperature for the indicated time. Then the resultant mixture was cooled to room temperature, and 1 mL of EtOAc was added. After the catalyst was filtered off by a pad of celite. The celite pad was rinsed with EtOAc (5 mL x 3). The filtrates were collected and the solvents were removed under reduced pressure to give a crude mixture. The yield was determined by <sup>1</sup>H NMR analysis of the crude mixture using 1,3,5-trimethoxybenzene as an internal standard. The er of **2a** or **2b** was determined by HPLC analysis (Chiralpak IB) after quick separation of the product using prep TLC.

Table S1. Investigation of ligands

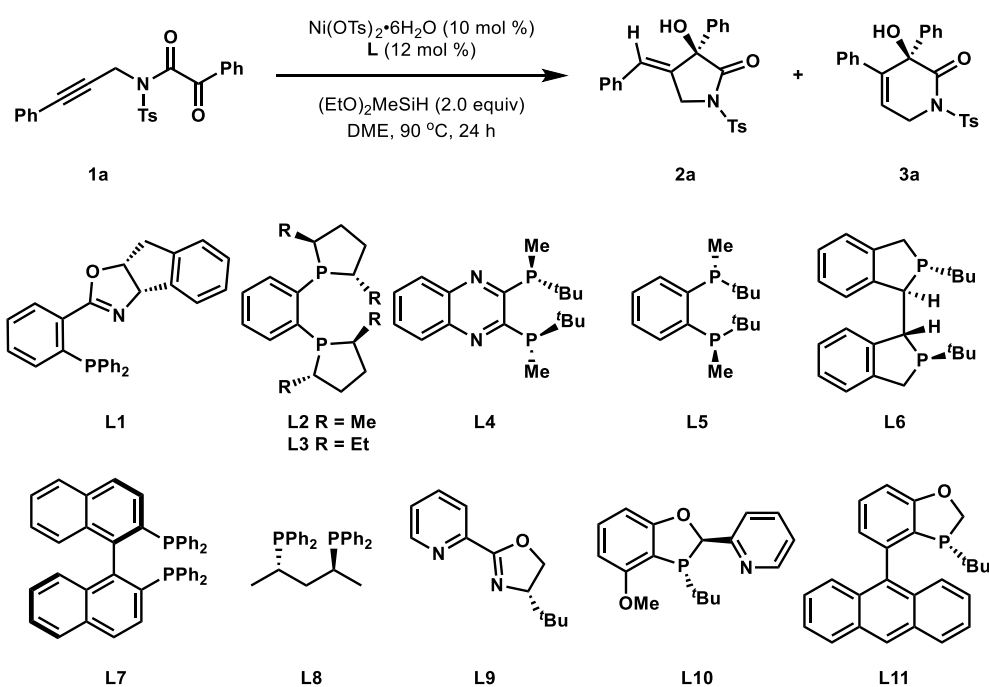

| entry <sup>a</sup> | L         | yield of <b>2a</b> (%) <sup>b</sup> | rr ( <b>2a</b> : <b>3a</b> ) <sup>b</sup> | er of <b>2a</b> <sup>c</sup> |
|--------------------|-----------|-------------------------------------|-------------------------------------------|------------------------------|
| 1 <sup>d</sup>     | <b>L1</b> | 24                                  | >20:1                                     | 93.5:6.5                     |
| <b>2</b>           | <b>L2</b> | <b>71</b>                           | <b>&gt;20:1</b>                           | <b>90:10</b>                 |

|    |            |    |       |           |
|----|------------|----|-------|-----------|
| 3  | <b>L3</b>  | 21 | >20:1 | 81.5:18.5 |
| 4  | <b>L4</b>  | 34 | >20:1 | 15:85     |
| 5  | <b>L5</b>  | 42 | >20:1 | 85.5:14.5 |
| 6  | <b>L6</b>  | 29 | >20:1 | 78:22     |
| 7  | <b>L7</b>  | <5 | –     | –         |
| 8  | <b>L8</b>  | 22 | >20:1 | 64.5:35.5 |
| 9  | <b>L9</b>  | <5 | –     | –         |
| 10 | <b>L10</b> | 30 | >20:1 | 38:62     |
| 11 | <b>L11</b> | <5 | –     | –         |

<sup>a</sup>Conducted with Ni(OTs)<sub>2</sub>•6H<sub>2</sub>O (10 mol %), ligand (12 mol %), (EtO)<sub>2</sub>MeSiH (0.2 mmol), and **1a** (0.1 mmol) in DME (1.0 mL) at 90 °C for 24 h. <sup>b</sup>Determined by <sup>1</sup>H NMR using 1,3,5-trimethoxybenzene as an internal standard. <sup>c</sup>Determined by HPLC analysis (Chiralpak IB). <sup>d</sup>Another product (structure unidentified) also obtained.

**Table S2. Screening of nickel precursors**

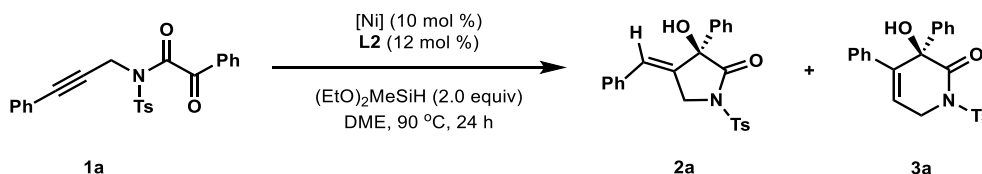

| entry <sup>a</sup> | [Ni]                                                 | yield of <b>2a</b> (%) <sup>b</sup> | rr ( <b>2a:3a</b> ) <sup>b</sup> | er of <b>2a</b> <sup>c</sup> |
|--------------------|------------------------------------------------------|-------------------------------------|----------------------------------|------------------------------|
| 1                  | Ni(OTs) <sub>2</sub> •6H <sub>2</sub> O              | 71                                  | >20:1                            | 90:10                        |
| 2                  | Ni(BF <sub>4</sub> ) <sub>2</sub> •6H <sub>2</sub> O | 13                                  | >20:1                            | –                            |
| 3                  | Ni(OAc) <sub>2</sub> •4H <sub>2</sub> O              | 24                                  | >20:1                            | 83.5:16.5                    |
| 4                  | Ni(OTf) <sub>2</sub>                                 | <5                                  | –                                | –                            |
| 5                  | Ni(cod) <sub>2</sub>                                 | 19                                  | >20:1                            | –                            |

<sup>a</sup>Conducted with [Ni] (10 mol %), **L2** (12 mol %), (EtO)<sub>2</sub>MeSiH (0.1 mmol), and **1a** (0.05 mmol) in DME (1.0 mL) at 90 °C for 24 h. <sup>b</sup>Determined by <sup>1</sup>H NMR using 1,3,5-trimethoxybenzene as an internal standard. <sup>c</sup>Determined by HPLC analysis (Chiralpak IB).

**Table S3. Investigation of the effect of temperature**

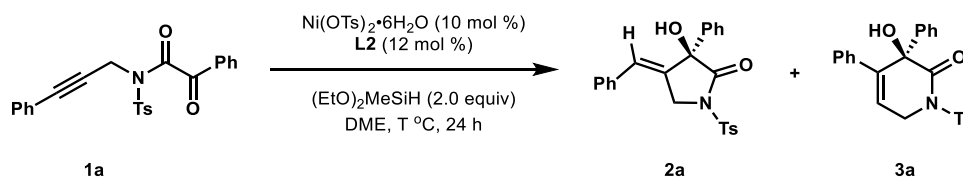

| entry <sup>a</sup> | T (°C) | yield of <b>2a</b> (%) <sup>b</sup> | rr ( <b>2a:3a</b> ) <sup>b</sup> | er of <b>2a</b> <sup>c</sup> |
|--------------------|--------|-------------------------------------|----------------------------------|------------------------------|
|--------------------|--------|-------------------------------------|----------------------------------|------------------------------|

|   |    |    |       |          |
|---|----|----|-------|----------|
| 1 | 90 | 72 | >20:1 | 90:10    |
| 2 | 80 | 61 | >20:1 | 90.5:9.5 |
| 3 | 70 | 56 | >20:1 | 91.5:8.5 |
| 4 | 60 | 42 | >20:1 | 92:8     |

<sup>a</sup>Conducted with Ni(OTs)<sub>2</sub>•6H<sub>2</sub>O (10 mol %), **L2** (12 mol %), (EtO)<sub>2</sub>MeSiH (0.1 mmol), and **1a** (0.05 mmol) in DME at T °C for 24 h. <sup>b</sup>Determined by <sup>1</sup>H NMR using 1,3,5-trimethoxybenzene as an internal standard. <sup>c</sup>Determined by HPLC analysis (Chiralpak IB).

**Table S5. Investigation of the effect of N-protective groups**

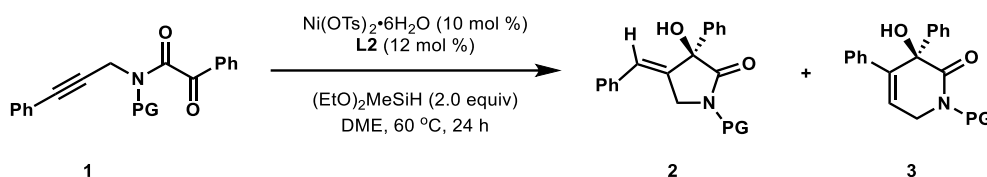

| entry <sup>a</sup> | PG                                 | yield of <b>2</b> (%) <sup>b</sup> | rr ( <b>2:3</b> ) <sup>b</sup> | er of <b>2</b> <sup>c</sup> |
|--------------------|------------------------------------|------------------------------------|--------------------------------|-----------------------------|
| 1                  | Ts ( <b>1a</b> )                   | 42 ( <b>2a</b> )                   | >20:1                          | 92:8                        |
| 2                  | PO(OPh) <sub>2</sub> ( <b>1b</b> ) | 50 ( <b>2b</b> )                   | >20:1                          | 93:7                        |
| 3                  | POPh <sub>2</sub>                  | 17                                 | >20:1                          | 92.5:7.5                    |
| 4                  | Ms                                 | 30                                 | >20:1                          | 92:8                        |
| 5                  | PMP                                | 56                                 | >20:1                          | 91.5:8.5                    |
| 6                  | Me                                 | 30                                 | >20:1                          | 83.5:16.5                   |
| 7                  | Ac                                 | 66                                 | >20:1                          | 84:16                       |
| 8                  | Bz                                 | 48                                 | >20:1                          | 90.5:9.5                    |
| 9                  | H                                  | <5                                 | –                              | –                           |

<sup>a</sup>Conducted with Ni(OTs)<sub>2</sub>•6H<sub>2</sub>O (10 mol %), **L2** (12 mol %), (EtO)<sub>2</sub>MeSiH (0.2 mmol), and **1** (0.1 mmol) in DME (1.0 mL) at 60 °C for 24 h. <sup>b</sup>Determined by <sup>1</sup>H NMR using 1,3,5-trimethoxybenzene as an internal standard. <sup>c</sup>Determined by HPLC analysis (Chiralpak IB).

**Table S6. Investigation of the effect of solvents**

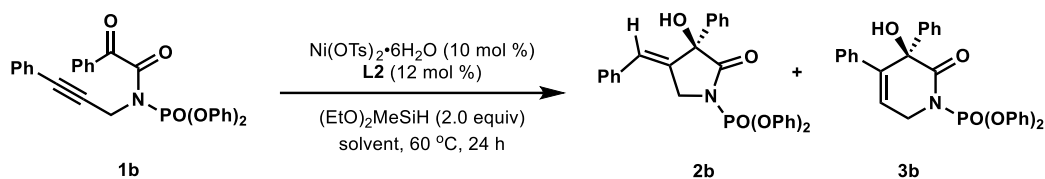

| entry <sup>a</sup> | solvent | yield of <b>2b</b> (%) <sup>b</sup> | rr ( <b>2b:3b</b> ) <sup>b</sup> | er of <b>2b</b> <sup>c</sup> |
|--------------------|---------|-------------------------------------|----------------------------------|------------------------------|
| 1                  | DME     | 50                                  | >20:1                            | 93:7                         |

|   |         |    |       |           |
|---|---------|----|-------|-----------|
| 2 | THF     | 55 | >20:1 | 93.5:6.5  |
| 3 | 2-MeTHF | 64 | >20:1 | 93.5:6.5  |
| 4 | toluene | 53 | >20:1 | 86.5:13.5 |
| 5 | benzene | 44 | >20:1 | 93:7      |

<sup>a</sup>Conducted with Ni(OTs)<sub>2</sub>·6H<sub>2</sub>O (10 mol %), **L2** (12 mol %), (EtO)<sub>2</sub>MeSiH (0.1 mmol), and **1** (0.05 mmol) in solvent (0.5 mL) at 60 °C. <sup>b</sup>Determined by <sup>1</sup>H NMR using 1,3,5-trimethoxybenzene as an internal standard.

<sup>c</sup>Determined by HPLC analysis (Chiralpak IB).

**Table S7. Further Investigation of the effect of temperature and concentration**

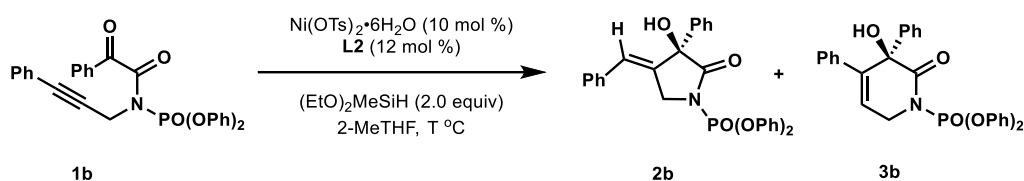

| entry <sup>a</sup> | T (°C) | conc. (M) | time (h) | yield of <b>2b</b> (%) <sup>b</sup> | rr ( <b>2b:3b</b> ) <sup>b</sup> | er of <b>2b</b> <sup>c</sup> |
|--------------------|--------|-----------|----------|-------------------------------------|----------------------------------|------------------------------|
| 1                  | 60     | 0.05      | 24       | 65                                  | >20:1                            | 93:7                         |
| 2                  | 50     | 0.05      | 24       | 60                                  | >20:1                            | 93.5:6.5                     |
| 3                  | 40     | 0.05      | 24       | 51                                  | >20:1                            | 93.5:6.5                     |
| 4                  | 40     | 0.1       | 24       | 52                                  | >20:1                            | 94:6                         |
| 5                  | 40     | 0.1       | 12       | 50                                  | >20:1                            | 94.5:5.5                     |

<sup>a</sup>Conducted with Ni(OTs)<sub>2</sub>·6H<sub>2</sub>O (10 mol %), **L2** (12 mol %), (EtO)<sub>2</sub>MeSiH (0.1 mmol), and **1b** (0.05 mmol) in 2-MeTHF at T °C. <sup>b</sup>Determined by <sup>1</sup>H NMR using 1,3,5-trimethoxybenzene as an internal standard. <sup>c</sup>Determined by HPLC analysis (Chiralpak IB).

**Table S8. Investigation of the loading of the ligand**

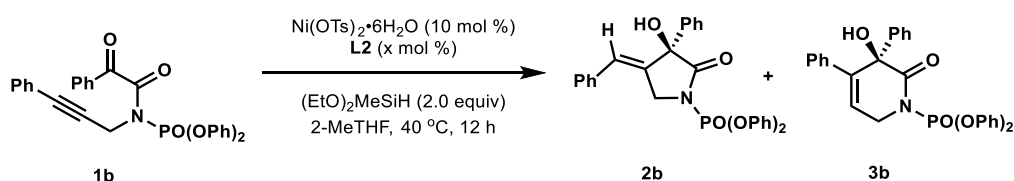

| entry <sup>a</sup> | <b>L2</b> (x mol %) | yield of <b>2b</b> (%) <sup>b</sup> | rr ( <b>2b:3b</b> ) <sup>b</sup> | er of <b>2b</b> <sup>c</sup> |
|--------------------|---------------------|-------------------------------------|----------------------------------|------------------------------|
| 1                  | 5                   | 33                                  | >20:1                            | 93:7                         |
| 2                  | 8                   | 47                                  | >20:1                            | 94:6                         |
| 3                  | 10                  | 57                                  | >20:1                            | 94.5:5.5                     |
| 4                  | 12                  | 49                                  | >20:1                            | 94.5:5.5                     |
| 5                  | 15                  | 45                                  | >20:1                            | 94.5:5.5                     |

6 20 38 &gt;20:1 94.5:5.5

<sup>a</sup>Conducted with Ni(OTs)<sub>2</sub>•6H<sub>2</sub>O (10 mol %), **L2** (x mol %), (EtO)<sub>2</sub>MeSiH (0.1 mmol), and **1b** (0.05 mmol) in 2-MeTHF at 40 °C for 12 h. <sup>b</sup>Determined by <sup>1</sup>H NMR using 1,3,5-trimethoxybenzene as an internal standard. <sup>c</sup>Determined by HPLC analysis (Chiralpak IB).

Table S9. Screening of additives

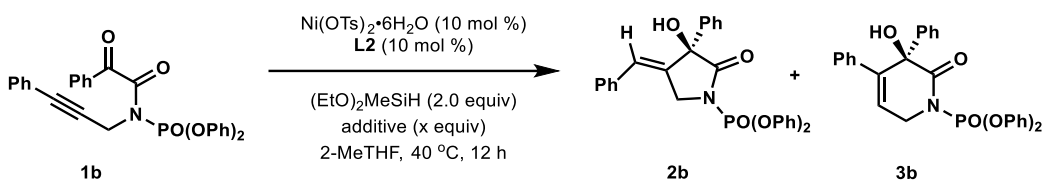

| entry <sup>a</sup> | additive (x equiv)                                             | yield of <b>2b</b> (%) <sup>b</sup> | rr ( <b>2b</b> : <b>3b</b> ) <sup>b</sup> | er of <b>2b</b> <sup>c</sup> |
|--------------------|----------------------------------------------------------------|-------------------------------------|-------------------------------------------|------------------------------|
| 1                  | none                                                           | 57                                  | >20:1                                     | 94.5:5.5                     |
| 2                  | Na <sub>2</sub> CO <sub>3</sub> (2.0 equiv)                    | 27                                  | >20:1                                     | 93.5:6.5                     |
| 3                  | NaHCO <sub>3</sub> (2.0 equiv)                                 | 41                                  | >20:1                                     | 83.5:16.5                    |
| 4                  | NaOAc (2.0 equiv)                                              | 18                                  | –                                         | –                            |
| 5                  | NaF (2.0 equiv)                                                | 53                                  | >20:1                                     | 93.5:6.5                     |
| 6                  | K <sub>3</sub> PO <sub>4</sub> (2.0 equiv)                     | –                                   | –                                         | –                            |
| 7                  | KPF <sub>6</sub> (2.0 equiv)                                   | –                                   | –                                         | –                            |
| 8                  | K <sub>2</sub> HPO <sub>4</sub> •3H <sub>2</sub> O (2.0 equiv) | 52                                  | >20:1                                     | 90.5:9.5                     |
| 9                  | KH <sub>2</sub> PO <sub>4</sub> (2.0 equiv)                    | 71                                  | >20:1                                     | 94:6                         |
| 10                 | NaH <sub>2</sub> PO <sub>4</sub> (2.0 equiv)                   | 71                                  | >20:1                                     | 94:6                         |
| 11                 | NaH <sub>2</sub> PO <sub>4</sub> (1.0 equiv)                   | 70                                  | >20:1                                     | 94.5:5.5                     |
| 12                 | NaH <sub>2</sub> PO <sub>4</sub> (0.5 equiv)                   | 77 (73)                             | >20:1                                     | 94.5:5.5                     |
| 13 <sup>d</sup>    | NaH <sub>2</sub> PO <sub>4</sub> (0.5 equiv)                   | 40                                  | >20:1                                     | 94.5:5.5                     |
| 14                 | NaH <sub>2</sub> PO <sub>4</sub> (0.2 equiv)                   | 74                                  | >20:1                                     | 94.5:5.5                     |

<sup>a</sup>Conducted with Ni(OTs)<sub>2</sub>•6H<sub>2</sub>O (10 mol %), **L2** (10 mol %), (EtO)<sub>2</sub>MeSiH (0.2 mmol), additive, and **1b** (0.1 mmol) in 2-MeTHF (1.0 mL) at 40 °C for 12 h. <sup>b</sup>Determined by <sup>1</sup>H NMR using 1,3,5-trimethoxybenzene as an internal standard. <sup>c</sup>Determined by HPLC analysis (Chiralpak IB). <sup>d</sup>Conducted with Ni(OTs)<sub>2</sub>•6H<sub>2</sub>O (5 mol %), **L2** (5 mol %).

## Scheme S1. Unsuccessful Substrates

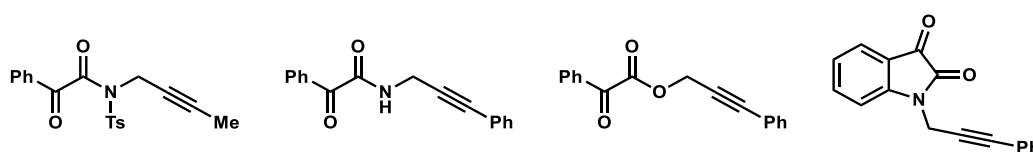

### III. General Procedures for the Preparation of Substrates 1

$\alpha$ -Ketoacids were prepared following the reported procedures and the spectroscopic data were found consistent with those reported in the literature [1-3].

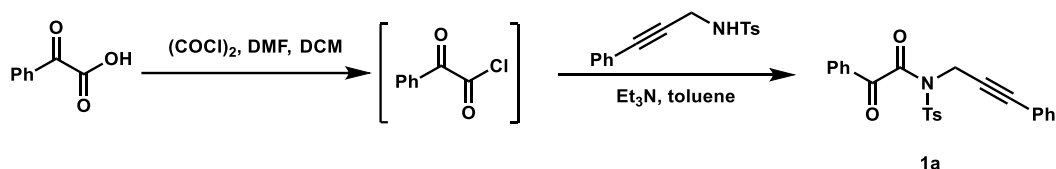

#### 2-Oxo-2-phenyl-*N*-(3-phenylprop-2-yn-1-yl)-*N*-tosylacetamide (**1a**)

To a solution of phenylglyoxylic acid (1.07 g, 7.1 mmol, 1.2 equiv) in DCM (10 mL) were added 2 drops of DMF followed by the addition of oxalyl chloride (0.70 mL, 9.0 mmol, 1.4 equiv) dropwise by a syringe. The yellow mixture was stirred at room temperature for 3 h. The solvent was removed under reduced pressure, and the residue was dissolved in toluene (10 mL). The resultant solution was then added dropwise to a flask containing 4-methyl-*N*-(3-phenylprop-2-yn-1-yl)benzenesulfonamide (1.69 g, 5.9 mmol, 1.0 equiv), Et<sub>3</sub>N (1.6 mL, 20 mmol, 2.0 equiv), and toluene (10 mL) at 0 °C. The mixture was left to stir at room temperature for 15 h. An aqueous solution of HCl (1 M) was added and the mixture was stirred until a clear organic layer was obtained. The aqueous layer was extracted with EtOAc (2 × 30 mL). The combined organic layer was washed with brine, dried over anhydrous Na<sub>2</sub>SO<sub>4</sub>, and concentrated under reduced pressure. The desired product **1a** (1.42 g, 58%) was obtained as a yellow solid after purification by silica gel chromatography (PE / EtOAc = 5 / 1).

<sup>1</sup>H NMR (400 MHz, CDCl<sub>3</sub>)  $\delta$  7.98 – 7.88 (m, 4H), 7.65 – 7.57 (m, 1H), 7.49 (t,  $J$  = 7.8 Hz, 2H), 7.29 (d,  $J$  = 8.2 Hz, 2H), 7.25 – 7.18 (m, 3H), 7.14 – 7.03 (m, 2H), 4.82 (s, 2H), 2.33 (s, 3H). These data are in agreement with those reported in the literature.[4]

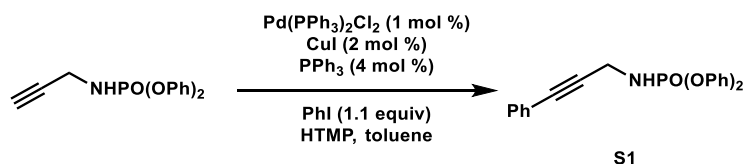

#### Diphenyl (3-phenylprop-2-yn-1-yl)phosphoramidate (**S1**)

**General procedure A:** To a Schlenk flask equipped with a magnetic stirring bar were added CuI (76.0 mg, 0.4 mmol, 2 mol %), Pd(PPh<sub>3</sub>)<sub>2</sub>Cl<sub>2</sub> (140.4 mg, 0.2 mmol, 1 mol %), PPh<sub>3</sub> (209.6 mg, 0.8 mmol, 4 mol %), iodobenzene (4.49 g, 22 mmol, 1.1 equiv) and diphenyl prop-2-yn-



1-ylphosphoramidate (5.74 g, 20 mmol, 1.0 equiv), followed by the addition of 2,2,6,6-tetramethylpiperidine (7 mL) and toluene (28 mL). The flask was sealed and the mixture was stirred at room temperature for 6 h. The mixture was quenched with saturated  $\text{NH}_4\text{Cl}$  (30 mL), diluted with  $\text{H}_2\text{O}$  (20 mL), and extracted with EtOAc (30 mL  $\times$  3). The combined organic layers were washed with brine, dried over anhydrous  $\text{Na}_2\text{SO}_4$ , and concentrated under reduced pressure. The desired product **S1** (6.18 g, 85%) was obtained as a white solid after purification by silica gel chromatography.  $R_f = 0.3$  (PE / EtOAc = 2 / 1).

$^1\text{H NMR}$  (400 MHz,  $\text{CDCl}_3$ )  $\delta$  7.37 – 7.25 (m, 13H), 7.20 – 7.13 (m, 2H), 4.12 (dd,  $J = 11.7$ , 6.6 Hz, 2H), 3.43 (brs, 1H).

$^{13}\text{C NMR}$  (100 MHz,  $\text{CDCl}_3$ )  $\delta$  150.8 (d,  $J = 6.8$  Hz), 131.8, 129.9, 128.6, 128.4, 125.2, 122.6, 120.5 (d,  $J = 5.1$  Hz), 85.8 (d,  $J = 6.8$  Hz), 84.0, 32.4.

$^{31}\text{P NMR}$  (162 MHz,  $\text{CDCl}_3$ )  $\delta$  -2.0.

**HRMS** (ESI $^+$ )  $m/z$  calc'd for  $\text{C}_{21}\text{H}_{18}\text{NO}_3\text{PNa}$   $[\text{M}+\text{Na}]^+$ : 386.0917, found 386.0912.

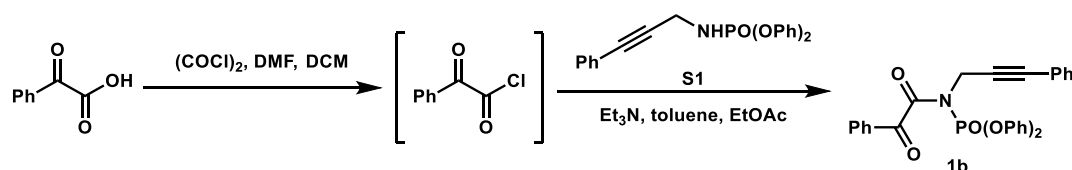

### Diphenyl (2-oxo-2-phenylacetyl)(3-phenylprop-2-yn-1-yl)phosphoramidate (**1b**)

**General procedure B:** To a solution of phenylglyoxylic acid (0.98 g, 6.5 mmol, 1.3 equiv) and 2 drops of DMF in DCM (10 mL) was added oxalyl chloride (0.68 mL, 8.0 mmol, 1.6 equiv) dropwise. The mixture was stirred at room temperature for 3 h. The solvent was removed under reduced pressure and the residue was dissolved in toluene (10 mL). The resultant solution was then added dropwise to a solution of **S1** (1.81 g, 5.0 mmol, 1.0 equiv) and  $\text{Et}_3\text{N}$  (1.4 mL, 20 mmol, 4.0 equiv) in EtOAc (10 mL) at 0 °C. The mixture was left to stir at room temperature for 18 h. An aqueous solution of HCl (1 M) was added and the mixture was stirred until a clear organic layer was obtained. The aqueous layer was extracted with EtOAc (2  $\times$  20 mL). The combined organic layer was washed with brine, dried over anhydrous  $\text{Na}_2\text{SO}_4$ , and concentrated under reduced pressure. The desired product **1b** (1.97 g, 80%) was obtained as a brown solid after purification by silica gel chromatography.  $R_f = 0.5$  (PE / EtOAc = 5 / 1).

$^1\text{H NMR}$  (400 MHz,  $\text{CDCl}_3$ )  $\delta$  7.71 (d,  $J = 7.7$  Hz, 2H), 7.47 (t,  $J = 7.4$  Hz, 1H), 7.29 (t,  $J =$

7.7 Hz, 2H), 7.26 – 7.06 (m, 15H), 4.72 (d,  $J = 10.1$  Hz, 2H).

$^{13}\text{C}$  NMR (100 MHz,  $\text{CDCl}_3$ )  $\delta$  187.6, 169.2 (d,  $J = 10.3$  Hz), 149.8 (d,  $J = 6.6$  Hz), 134.3, 133.0, 131.9, 130.1, 129.6, 128.9, 128.8, 128.3, 126.0, 122.2, 120.2 (d,  $J = 5.1$  Hz), 84.6, 83.2, 35.2.

$^{31}\text{P}$  NMR (162 MHz,  $\text{CDCl}_3$ )  $\delta$  -10.3.

HRMS (ESI<sup>+</sup>)  $m/z$  calc'd for  $\text{C}_{29}\text{H}_{23}\text{NO}_5\text{P}$   $[\text{M}+\text{H}]^+$ : 496.1308, found 496.1306.

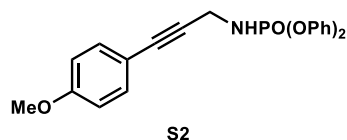

### Diphenyl (3-(4-methoxyphenyl)prop-2-yn-1-yl)phosphoramidate (S2)

The general procedure A was followed. The reaction was performed with CuI (7.6 mg, 0.04 mmol, 2 mol %),  $\text{Pd}(\text{PPh}_3)_2\text{Cl}_2$  (14.1 mg, 0.02 mmol, 1 mol %),  $\text{PPh}_3$  (20.9 mg, 0.08 mmol, 4 mol %), 1-iodo-4-methoxybenzene (514.8 mg, 2.2 mmol, 1.1 equiv) and diphenyl prop-2-yn-1-ylphosphoramidate (629.4 mg, 2.0 mmol, 1.0 equiv) in 2,2,6,6-tetramethylpiperidine (0.5 mL) and toluene (2.5 mL) at room temperature for 10 h. The desired product **S2** (813.2 mg, 94%) was obtained as a yellow solid after purification by silica gel chromatography.  $R_f = 0.5$  (PE / EtOAc = 2 / 1).

$^1\text{H}$  NMR (400 MHz,  $\text{CDCl}_3$ )  $\delta$  7.38 – 7.24 (m, 10H), 7.23 – 7.13 (m, 2H), 6.87 – 6.78 (m, 2H), 4.10 (dd,  $J = 11.8, 6.6$  Hz, 2H), 3.81 (s, 3H), 3.63 (brs, 1H).

$^{13}\text{C}$  NMR (101 MHz,  $\text{CDCl}_3$ )  $\delta$  159.8, 150.8 (d,  $J = 6.7$  Hz), 133.2, 129.8, 125.2 (d,  $J = 1.2$  Hz), 120.5 (d,  $J = 4.8$  Hz), 114.7, 114.0, 84.4 (d,  $J = 6.7$  Hz), 83.9, 55.4, 32.3.

$^{31}\text{P}$  NMR (162 MHz,  $\text{CDCl}_3$ )  $\delta$  -1.8.

HRMS (ESI<sup>+</sup>)  $m/z$  calc'd for  $\text{C}_{22}\text{H}_{21}\text{NO}_4\text{P}$   $[\text{M}+\text{H}]^+$ : 394.1208, found 394.1210.

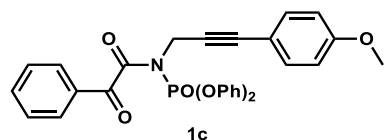

### Diphenyl (3-(4-methoxyphenyl)prop-2-yn-1-yl)(2-oxo-2-phenylacetyl)phosphoramidate (1c)

The general procedure B was followed. The reaction was performed with phenylglyoxylic acid (0.38 g, 2.5 mmol, 1.3 equiv), oxalyl chloride (0.23 mL, 3.2 mmol, 1.6 equiv), **S2** (786.4 mg, 2.0 mmol, 1.0 equiv), and  $\text{Et}_3\text{N}$  (0.6 mL) in EtOAc (5 mL) and toluene (5 mL) at room

temperature for 14 h. The desired product **1c** (764.2 mg, 73%) was obtained as a yellow solid after purification by silica gel chromatography.  $R_f = 0.3$  (PE / EtOAc = 5 / 1).

$^1\text{H NMR}$  (400 MHz,  $\text{CDCl}_3$ )  $\delta$  7.71 – 7.64 (m, 2H), 7.46 – 7.37 (m, 1H), 7.28 – 7.20 (m, 2H), 7.20 – 7.09 (m, 8H), 7.09 – 7.00 (m, 4H), 6.67 (d,  $J = 8.4$  Hz, 2H), 4.69 (d,  $J = 10.1$  Hz, 2H), 3.66 (s, 3H).

$^{13}\text{C NMR}$  (100 MHz,  $\text{CDCl}_3$ )  $\delta$  187.6, 169.2 (d,  $J = 10.1$  Hz), 159.9, 149.7 (d,  $J = 6.6$  Hz), 134.2, 133.3, 132.9, 129.7, 129.5, 128.8, 125.9 (d,  $J = 1.3$  Hz), 120.1 (d,  $J = 5.1$  Hz), 114.1, 113.8, 84.7, 81.8, 55.3, 35.1.

$^{31}\text{P NMR}$  (162 MHz,  $\text{CDCl}_3$ )  $\delta$  -10.2.

**HRMS** ( $\text{ESI}^+$ )  $m/z$  calc'd for  $\text{C}_{30}\text{H}_{24}\text{NO}_6\text{PNa}$   $[\text{M}+\text{Na}]^+$ : 548.1233, found 548.1235.

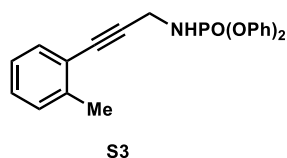

### Diphenyl (3-(*o*-tolyl)prop-2-yn-1-yl)phosphoramidate (**S3**)

The general procedure A was followed. The reaction was performed with CuI (7.6 mg, 0.04 mmol, 2 mol %),  $\text{Pd}(\text{PPh}_3)_2\text{Cl}_2$  (14.1 mg, 0.02 mmol, 1 mol %),  $\text{PPh}_3$  (20.9 mg, 0.08 mmol, 4 mol %), 1-iodo-2-methylbenzene (479.6 mg, 2.2 mmol, 1.1 equiv) and diphenyl prop-2-yn-1-ylphosphoramidate (572.1 mg, 2.0 mmol, 1.0 equiv) in 2,2,6,6-tetramethylpiperidine (0.5 mL) and toluene (2.5 mL) at room temperature for 10 h. The desired product **S3** (748.5 mg, 90%) was obtained as a yellow solid after purification by silica gel chromatography.  $R_f = 0.6$  (PE / EtOAc = 2 / 1).

$^1\text{H NMR}$  (400 MHz,  $\text{CDCl}_3$ )  $\delta$  7.37 – 7.27 (m, 8H), 7.25 – 7.07 (m, 6H), 4.17 (dd,  $J = 11.6$ , 6.7 Hz, 2H), 3.58 (brs, 1H), 2.36 (s, 3H).

$^{13}\text{C NMR}$  (101 MHz,  $\text{CDCl}_3$ )  $\delta$  150.7 (d,  $J = 6.8$  Hz), 140.3, 132.0, 129.7, 129.4, 128.5, 125.5, 125.1, 122.3, 120.4 (d,  $J = 4.9$  Hz), 89.5 (d,  $J = 7.0$  Hz), 82.8, 32.3, 20.6.

$^{31}\text{P NMR}$  (162 MHz,  $\text{CDCl}_3$ )  $\delta$  -1.9.

**HRMS** ( $\text{ESI}^+$ )  $m/z$  calc'd for  $\text{C}_{22}\text{H}_{21}\text{NO}_3\text{P}$   $[\text{M}+\text{H}]^+$ : 378.1259, found 378.1259.

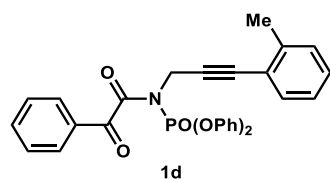

**Diphenyl (2-oxo-2-phenylacetyl)(3-(*o*-tolyl)prop-2-yn-1-yl)phosphoramidate (1d)**

The general procedure B was followed. The reaction was performed with phenylglyoxylic acid (0.39 g, 2.5 mmol, 1.3 equiv), oxalyl chloride (0.25 mL, 3.2 mmol, 1.6 equiv), **S3** (717.2 mg, 1.9 mmol, 1.0 equiv), and Et<sub>3</sub>N (0.6 mL) in EtOAc (2 mL) and toluene (2 mL) at room temperature for 14 h. The desired product **1d** (187.4 mg, 20%) was obtained as a yellow liquid after purification by silica gel chromatography.  $R_f = 0.7$  (PE / EtOAc = 2 / 1).

<sup>1</sup>H NMR (400 MHz, CDCl<sub>3</sub>) δ 7.71 (d,  $J = 7.7$  Hz, 2H), 7.50 – 7.40 (m, 1H), 7.33 – 7.23 (m, 3H), 7.22 – 7.15 (m, 5H), 7.15 – 7.05 (m, 7H), 7.01 (d,  $J = 7.7$  Hz, 1H), 4.74 (d,  $J = 10.1$ , 2H), 2.23 (s, 3H).

<sup>13</sup>C NMR (100 MHz, CDCl<sub>3</sub>) δ 187.6, 169.2 (d,  $J = 10.5$  Hz), 149.8 (d,  $J = 6.7$  Hz), 140.7, 134.3, 133.0, 132.2, 130.0, 129.6, 129.5, 128.84, 128.76, 126.0, 125.5, 122.0, 120.2 (d,  $J = 5.1$  Hz), 86.9, 83.7, 35.2, 20.6.

<sup>31</sup>P NMR (162 MHz, CDCl<sub>3</sub>) δ –10.2.

HRMS (ESI<sup>+</sup>)  $m/z$  calc'd for C<sub>30</sub>H<sub>25</sub>NO<sub>5</sub>P [M+H]<sup>+</sup>: 510.1465, found 510.1459.

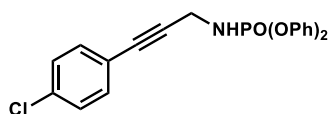

S4

**Diphenyl (3-(4-chlorophenyl)prop-2-yn-1-yl)phosphoramidate (S4)**

The general procedure A was followed. The reaction was performed with CuI (15.2 mg, 0.08 mmol, 2 mol %), Pd(PPh<sub>3</sub>)<sub>2</sub>Cl<sub>2</sub> (28.0 mg, 0.04 mmol, 1 mol %), PPh<sub>3</sub> (41.8 mg, 0.16 mmol, 4 mol %), 1-chloro-4-iodobenzene (1.05 g, 4.4 mmol, 1.1 equiv) and diphenyl prop-2-yn-1-ylphosphoramidate (1.05 g, 2.0 mmol, 1.0 equiv) in 2,2,6,6-tetramethylpiperidine (1.0 mL) and toluene (5.0 mL) at room temperature for 24 h. The desired product **S4** (1.38 g, 85%) was obtained as a yellow solid after purification by silica gel chromatography.  $R_f = 0.6$  (PE / EtOAc = 2 / 1).

<sup>1</sup>H NMR (400 MHz, CDCl<sub>3</sub>) δ 7.36 – 7.32 (m, 2H), 7.32 – 7.27 (m, 6H), 7.26 – 7.21 (m, 4H), 7.20 – 7.12 (m, 2H), 4.10 (dd,  $J = 12.0, 6.7$  Hz, 2H), 3.55 (brs, 1H).

<sup>13</sup>C NMR (101 MHz, CDCl<sub>3</sub>) δ 150.8 (d,  $J = 6.7$  Hz), 134.7, 133.0, 129.9, 128.8, 125.3, 121.1, 120.4 (d,  $J = 4.9$  Hz), 86.8 (d,  $J = 6.5$  Hz), 82.9, 32.3.

<sup>31</sup>P NMR (162 MHz, CDCl<sub>3</sub>) δ –2.0.

**HRMS** (ESI<sup>+</sup>)  $m/z$  calc'd for C<sub>21</sub>H<sub>18</sub>NO<sub>3</sub>PCl [M+H]<sup>+</sup>: 398.0713, found 398.0710.

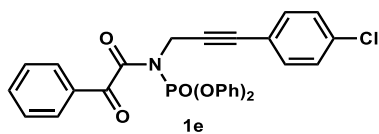

**Diphenyl (3-(4-chlorophenyl)prop-2-yn-1-yl)(2-oxo-2-phenylacetyl)phosphoramidate (1e)**

The general procedure B was followed. The reaction was performed with phenylglyoxylic acid (0.39 g, 2.5 mmol, 1.3 equiv), oxalyl chloride (0.25 mL, 3.2 mmol, 1.6 equiv), **S4** (795.6 mg, 2.0 mmol, 1.0 equiv), and Et<sub>3</sub>N (0.6 mL) in EtOAc (5 mL) and toluene (5 mL) at room temperature for 14 h. The desired product **1e** (194.8 mg, 19%) was obtained as a yellow liquid after purification by silica gel chromatography.  $R_f$  = 0.3 (PE / EtOAc = 5 / 1).

**<sup>1</sup>H NMR** (400 MHz, CDCl<sub>3</sub>) 7.66 (d,  $J$  = 7.7 Hz, 2H), 7.38 (t,  $J$  = 7.4 Hz, 1H), 7.21 (t,  $J$  = 7.7 Hz, 2H), 7.16 – 7.05 (m, 10H), 7.04 – 6.94 (m, 4H), 4.67 (d,  $J$  = 10.0 Hz, 2H).

**<sup>13</sup>C NMR** (100 MHz, CDCl<sub>3</sub>)  $\delta$  187.4, 169.0 (d,  $J$  = 10.2 Hz), 149.6 (d,  $J$  = 6.5 Hz), 134.6, 134.2, 132.9, 132.7, 129.9, 129.3, 128.7, 128.5, 125.9, 120.0 (d,  $J$  = 5.1 Hz), 119.9, 84.1, 83.4, 34.8.

**<sup>31</sup>P NMR** (162 MHz, CDCl<sub>3</sub>)  $\delta$  -10.3.

**HRMS** (ESI<sup>+</sup>)  $m/z$  calc'd for C<sub>29</sub>H<sub>22</sub>NO<sub>5</sub>PCl [M+H]<sup>+</sup>: 530.0919, found 530.0919.

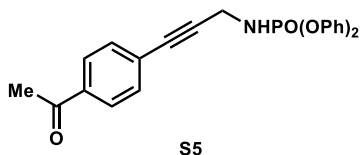

**Diphenyl (3-(4-acetylphenyl)prop-2-yn-1-yl)phosphoramidate (S5)**

The general procedure A was followed. The reaction was performed with CuI (7.6 mg, 0.04 mmol, 2 mol %), Pd(PPh<sub>3</sub>)<sub>2</sub>Cl<sub>2</sub> (14.1 mg, 0.02 mmol, 1 mol %), PPh<sub>3</sub> (20.9 mg, 0.08 mmol, 4 mol %), 1-(4-iodophenyl)ethan-1-one (541.2 mg, 2.2 mmol, 1.1 equiv) and diphenyl prop-2-yn-1-ylphosphoramidate (572.0 mg, 2.0 mmol, 1.0 equiv) in 2,2,6,6-tetramethylpiperidine (0.5 mL) and toluene (2.5 mL) at room temperature for 10 h. The desired product **S5** (777.2 mg, 96%) was obtained as a yellow solid after purification by silica gel chromatography.  $R_f$  = 0.3 (PE / EtOAc = 2 / 1).

**<sup>1</sup>H NMR** (400 MHz, CDCl<sub>3</sub>)  $\delta$  7.91 – 7.84 (m, 2H), 7.47 – 7.36 (m, 2H), 7.35 – 7.26 (m, 8H), 7.23 – 7.12 (m, 2H), 4.13 (dd,  $J$  = 12.3, 6.7 Hz, 2H), 3.77 (brs, 1H), 2.60 (s, 3H).

$^{13}\text{C}$  NMR (101 MHz,  $\text{CDCl}_3$ )  $\delta$  197.4, 150.8 (d,  $J = 6.7$  Hz), 136.5, 131.9, 129.9, 128.3, 127.5, 125.2 (d,  $J = 1.2$  Hz), 120.4 (d,  $J = 5.0$  Hz), 89.3 (d,  $J = 6.1$  Hz), 83.2, 32.3, 26.7.

$^{31}\text{P}$  NMR (162 MHz,  $\text{CDCl}_3$ )  $\delta$  -2.0.

HRMS (ESI $^+$ )  $m/z$  calc'd for  $\text{C}_{23}\text{H}_{21}\text{NO}_4\text{P}$   $[\text{M}+\text{H}]^+$ : 406.1208, found 406.1208.

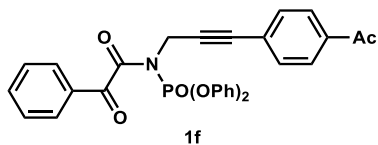

### Diphenyl (3-(4-acetylphenyl)prop-2-yn-1-yl)(2-oxo-2-phenylacetyl)phosphoramidate (**1f**)

The general procedure B was followed. The reaction was performed with phenylglyoxylic acid (0.39 g, 2.5 mmol, 1.3 equiv), oxalyl chloride (0.25 mL, 3.2 mmol, 1.6 equiv), **S5** (770.1 mg, 1.9 mmol, 1.0 equiv), and  $\text{Et}_3\text{N}$  (0.6 mL) in EtOAc (5 mL) and toluene (5 mL) at room temperature for 14 h. The desired product **1f** (554.0 mg, 52%) was obtained as a yellow liquid after purification by silica gel chromatography.  $R_f = 0.6$  (PE / EtOAc = 5 / 1).

$^1\text{H}$  NMR (400 MHz,  $\text{CDCl}_3$ )  $\delta$  7.73 – 7.62 (m, 4H), 7.39 (t,  $J = 7.4$  Hz, 1H), 7.22 (t,  $J = 7.7$  Hz, 2H), 7.12 – 7.07 (m, 10H), 7.02 (t,  $J = 7.1$  Hz, 2H), 4.71 (d,  $J = 9.9$  Hz, 2H), 2.41 (s, 3H).

$^{13}\text{C}$  NMR (100 MHz,  $\text{CDCl}_3$ )  $\delta$  197.1, 187.4, 168.9 (d,  $J = 10.3$  Hz), 149.5 (d,  $J = 6.5$  Hz), 136.4, 134.2, 132.6, 131.7, 129.9, 129.3, 128.7, 128.0, 126.6, 125.9, 119.9 (d,  $J = 5.1$  Hz), 86.3, 83.6, 34.7, 26.5.

$^{31}\text{P}$  NMR (162 MHz,  $\text{CDCl}_3$ )  $\delta$  -10.4.

HRMS (ESI $^+$ )  $m/z$  calc'd for  $\text{C}_{31}\text{H}_{25}\text{NO}_6\text{P}$   $[\text{M}+\text{H}]^+$ : 538.1414, found 538.1413.

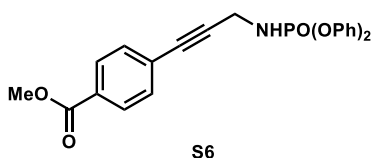

### Methyl 4-(3-((diphenoxyphosphoryl)amino)prop-1-yn-1-yl)benzoate (**S6**)

The general procedure A was followed. The reaction was performed with CuI (30.4 mg, 0.04 mmol, 2 mol %),  $\text{Pd}(\text{PPh}_3)_2\text{Cl}_2$  (56.0 mg, 0.02 mmol, 1 mol %),  $\text{PPh}_3$  (41.8 mg, 0.08 mmol, 4 mol %), methyl 4-iodobenzoate (1.15 g, 4.4 mmol, 1.1 equiv) and diphenyl prop-2-yn-1-ylphosphoramidate (1.14 g, 4.0 mmol, 1.0 equiv) in 2,2,6,6-tetramethylpiperidine (1.0 mL) and toluene (5.0 mL) at room temperature for 10 h. The desired product **S6** (1.32 g, 78%) was obtained as a white solid after purification by silica gel chromatography.  $R_f = 0.5$  (PE / EtOAc = 2 / 1).

$^1\text{H NMR}$  (400 MHz,  $\text{CDCl}_3$ )  $\delta$  7.90 – 7.83 (m, 2H), 7.30 – 7.20 (m, 10H), 7.12 – 7.02 (m, 2H), 4.04 (dd,  $J = 12.3, 6.7$  Hz, 2H), 3.83 (s, 3H), 3.70 (brs, 1H).

$^{13}\text{C NMR}$  (101 MHz,  $\text{CDCl}_3$ )  $\delta$  166.5, 150.6 (d,  $J = 6.6$  Hz), 131.6, 129.8, 129.4, 127.2, 125.1 (d,  $J = 1.3$  Hz), 120.3 (d,  $J = 4.9$  Hz), 88.9 (d,  $J = 6.2$  Hz), 83.1, 52.3, 32.2.

$^{31}\text{P NMR}$  (162 MHz,  $\text{CDCl}_3$ )  $\delta$  -1.9.

**HRMS** (ESI<sup>+</sup>)  $m/z$  calc'd for  $\text{C}_{23}\text{H}_{21}\text{NO}_5\text{P}$   $[\text{M}+\text{H}]^+$ : 422.1157, found 422.1157.

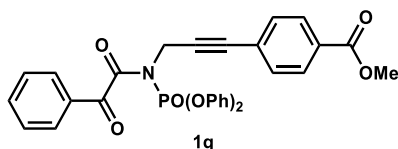

**Methyl 4-(3-(N-(diphenoxyphosphoryl)-2-oxo-2-phenylacetamido)prop-1-yn-1-yl)benzoate (1g)**

The general procedure B was followed. The reaction was performed with phenylglyoxylic acid (0.39 g, 2.5 mmol, 1.3 equiv), oxalyl chloride (0.25 mL, 3.2 mmol, 1.6 equiv), **S6** (842.8 mg, 2.0 mmol, 1.0 equiv), and  $\text{Et}_3\text{N}$  (0.6 mL) in EtOAc (2 mL) and toluene (2 mL) at room temperature for 14 h. The desired product **1g** (798.1 mg, 72%) was obtained as a yellow solid after purification by silica gel chromatography.  $R_f = 0.6$  (PE / EtOAc = 5 / 1).

$^1\text{H NMR}$  (400 MHz,  $\text{CDCl}_3$ )  $\delta$  7.85 (d,  $J = 8.0$  Hz, 2H), 7.71 (dd,  $J = 8.0, 1.5$  Hz, 2H), 7.54 – 7.44 (m, 1H), 7.30 (t,  $J = 7.8$  Hz, 2H), 7.24 – 7.17 (m, 6H), 7.17 – 7.01 (m, 6H), 4.74 (d,  $J = 10.1$  Hz, 2H), 3.84 (s, 3H).

$^{13}\text{C NMR}$  (100 MHz,  $\text{CDCl}_3$ )  $\delta$  197.1, 187.6, 169.1 (d,  $J = 10.1$  Hz), 166.5, 149.8 (d,  $J = 6.6$  Hz), 134.4, 132.9, 131.8, 130.1, 129.6, 129.4, 128.9, 126.8, 126.1, 120.2 (d,  $J = 5.1$  Hz), 86.2, 84.0, 52.4, 35.8.

$^{31}\text{P NMR}$  (162 MHz,  $\text{CDCl}_3$ )  $\delta$  -10.1.

**HRMS** (ESI<sup>+</sup>)  $m/z$  calc'd for  $\text{C}_{31}\text{H}_{25}\text{NO}_7\text{P}$   $[\text{M}+\text{H}]^+$ : 554.1369, found 554.1369.

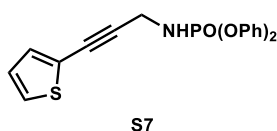

**Diphenyl (3-(thiophen-2-yl)prop-2-yn-1-yl)phosphoramidate (S7)**

The general procedure A was followed. The reaction was performed with CuI (30.4 mg, 0.04 mmol, 2 mol %),  $\text{Pd}(\text{PPh}_3)_2\text{Cl}_2$  (56.0 mg, 0.02 mmol, 1 mol %),  $\text{PPh}_3$  (41.8 mg, 0.08 mmol, 4 mol %), 2-iodothiophene (0.49 mL, 4.4 mmol, 1.1 equiv) and diphenyl prop-2-yn-1-

ylphosphoramidate (1.14 g, 4.0 mmol, 1.0 equiv) in 2,2,6,6-tetramethylpiperidine (1.0 mL) and toluene (5.0 mL) at room temperature for 10 h. The desired product **S7** (1.07 g, 73%) was obtained as a brown solid after purification by silica gel chromatography.  $R_f = 0.4$  (PE / EtOAc = 2 / 1).

$^1\text{H NMR}$  (400 MHz,  $\text{CDCl}_3$ )  $\delta$  7.31 – 7.19 (m, 8H), 7.19 – 7.15 (m, 2H), 7.13 – 7.06 (m, 2H), 7.05 (d,  $J = 3.6$  Hz, 1H), 6.88 (dd,  $J = 5.2, 3.6$  Hz, 1H), 4.05 (dd,  $J = 11.9, 6.7$  Hz, 2H), 3.38 (brs, 1H).

$^{13}\text{C NMR}$  (101 MHz,  $\text{CDCl}_3$ )  $\delta$  150.7 (d,  $J = 6.8$  Hz), 132.4, 129.9, 127.4, 127.1, 125.3 (d,  $J = 1.3$  Hz), 122.5, 120.5 (d,  $J = 5.0$  Hz), 89.7 (d,  $J = 6.6$  Hz), 89.2, 32.5.

$^{31}\text{P NMR}$  (162 MHz,  $\text{CDCl}_3$ )  $\delta$  -2.0.

**HRMS** (ESI<sup>+</sup>)  $m/z$  calc'd for  $\text{C}_{19}\text{H}_{17}\text{NO}_3\text{PS}$   $[\text{M}+\text{H}]^+$ : 370.0667, found 370.0667.

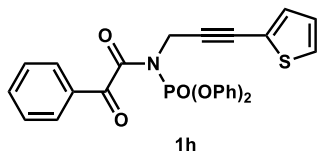

#### Diphenyl (2-oxo-2-phenylacetyl)(3-(thiophen-2-yl)prop-2-yn-1-yl)phosphoramidate (**1h**)

The general procedure B was followed. The reaction was performed with phenylglyoxylic acid (0.39 g, 2.5 mmol, 1.3 equiv), oxalyl chloride (0.25 mL, 3.2 mmol, 1.6 equiv), **S7** (0.74 g, 2.0 mmol, 1.0 equiv), and  $\text{Et}_3\text{N}$  (0.6 mL) in EtOAc (2 mL) and toluene (2 mL) at room temperature for 14 h. The desired product **1h** (430.2 mg, 43%) was obtained as a yellow liquid after purification by silica gel chromatography.  $R_f = 0.6$  (PE / EtOAc = 1 / 1).

$^1\text{H NMR}$  (400 MHz,  $\text{CDCl}_3$ )  $\delta$  7.73 – 7.66 (m, 2H), 7.50 – 7.42 (m, 1H), 7.29 (t,  $J = 7.7$  Hz, 2H), 7.34 – 7.06 (m, 11H), 6.97 (s, 1H), 6.89 – 6.82 (m, 1H), 4.73 (d,  $J = 10.0$  Hz, 2H).

$^{13}\text{C NMR}$  (100 MHz,  $\text{CDCl}_3$ )  $\delta$  187.6, 169.2 (d,  $J = 10.1$  Hz), 149.8 (d,  $J = 6.8$  Hz), 134.3, 133.0, 132.9, 130.1, 129.6, 128.9, 127.8, 127.0, 126.1 (d,  $J = 1.3$  Hz), 122.0, 120.2 (d,  $J = 5.3$  Hz), 87.2, 35.8.

$^{31}\text{P NMR}$  (162 MHz,  $\text{CDCl}_3$ )  $\delta$  -13.0.

**HRMS** (ESI<sup>+</sup>)  $m/z$  calc'd for  $\text{C}_{27}\text{H}_{21}\text{NO}_5\text{PS}$   $[\text{M}+\text{H}]^+$ : 502.0878, found 502.0878.

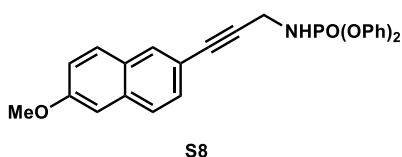

#### Diphenyl (3-(6-methoxynaphthalen-2-yl)prop-2-yn-1-yl)phosphoramidate (**S8**)



The general procedure A was followed. The reaction was performed with CuI (30.4 mg, 0.08 mmol, 2 mol %), Pd(PPh<sub>3</sub>)<sub>2</sub>Cl<sub>2</sub> (56.0 mg, 0.04 mmol, 1 mol %), PPh<sub>3</sub> (41.8 mg, 0.16 mmol, 4 mol %), 2-iodothiophene (0.49 mL, 4.4 mmol, 1.1 equiv) and diphenyl prop-2-yn-1-ylphosphoramidate (1.14 g, 4.0 mmol, 1.0 equiv) in 2,2,6,6-tetramethylpiperidine (1.0 mL) and toluene (5.0 mL) at room temperature for 10 h. The desired product **S8** (1.07 g, 73%) was obtained as a brown solid after purification by silica gel chromatography.  $R_f = 0.4$  (PE / EtOAc = 2 / 1).

<sup>1</sup>H NMR (400 MHz, CDCl<sub>3</sub>) δ 7.76 (d,  $J = 1.6$  Hz, 1H), 7.65 (dd,  $J = 8.7, 5.6$  Hz, 2H), 7.38 – 7.29 (m, 9H), 7.23 – 7.12 (m, 3H), 7.10 (d,  $J = 2.5$  Hz, 1H), 4.16 (dd,  $J = 11.7, 6.7$  Hz, 2H), 3.92 (s, 3H), 3.43 (brs, 1H).

<sup>13</sup>C NMR (101 MHz, CDCl<sub>3</sub>) δ 158.5, 150.8 (d,  $J = 6.8$  Hz), 134.3, 131.6, 129.9, 129.4, 129.0, 128.5, 126.9, 125.2, 120.5 (d,  $J = 5.0$  Hz), 119.6, 117.4, 105.9, 85.4 (d,  $J = 6.7$  Hz), 84.6, 55.5, 32.5.

<sup>31</sup>P NMR (162 MHz, CDCl<sub>3</sub>) δ –2.0.

HRMS (ESI<sup>+</sup>)  $m/z$  calc'd for C<sub>26</sub>H<sub>23</sub>NO<sub>4</sub>P [M+H]<sup>+</sup>: 444.1365, found 444.1363.

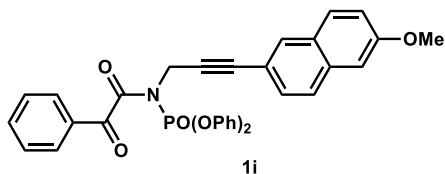

**Diphenyl (3-(6-methoxynaphthalen-2-yl)prop-2-yn-1-yl)(2-oxo-2-phenylacetyl)phosphoramidate (1i)**

The general procedure B was followed. The reaction was performed with phenylglyoxylic acid (0.39 g, 2.5 mmol, 1.3 equiv), oxalyl chloride (0.25 mL, 3.2 mmol, 1.6 equiv), **S8** (881.5 mg, 2.0 mmol, 1.0 equiv), and Et<sub>3</sub>N (0.6 mL) in EtOAc (2 mL) and toluene (2 mL) at room temperature for 14 h. The desired product **1i** (441.3 mg, 39%) was obtained as a yellow liquid after purification by silica gel chromatography.  $R_f = 0.6$  (PE / EtOAc = 2 / 1).

<sup>1</sup>H NMR (400 MHz, CDCl<sub>3</sub>) δ 7.76 – 7.69 (m, 2H), 7.59 – 7.50 (m, 2H), 7.45 (t,  $J = 7.5$  Hz, 1H), 7.28 (t,  $J = 7.7$  Hz, 2H), 7.24 – 7.14 (m, 10H), 7.14 – 7.04 (m, 3H), 7.01 (d,  $J = 2.5$  Hz, 1H), 4.76 (d,  $J = 10.1$  Hz, 2H), 3.84 (s, 3H).

$^{13}\text{C}$  NMR (100 MHz,  $\text{CDCl}_3$ )  $\delta$  187.6, 169.1 (d,  $J = 9.9$  Hz), 158.5, 149.8 (d,  $J = 6.6$  Hz), 134.3, 134.2, 132.9, 131.8, 130.0, 129.6, 129.3, 128.9, 128.8, 128.2, 126.7, 125.9, 120.2 (d,  $J = 5.1$  Hz), 119.5, 116.9, 105.8, 82.7, 55.4, 35.2.

$^{31}\text{P}$  NMR (162 MHz,  $\text{CDCl}_3$ )  $\delta$  -10.2.

HRMS (ESI $^+$ )  $m/z$  calc'd for  $\text{C}_{34}\text{H}_{27}\text{NO}_6\text{P}$   $[\text{M}+\text{H}]^+$ : 576.1571, found 576.1567.

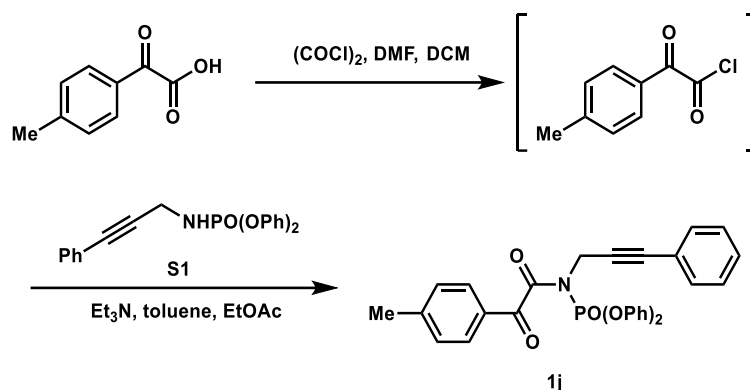

### Diphenyl (2-oxo-2-(*p*-tolyl)acetyl)(3-phenylprop-2-yn-1-yl)phosphoramidate (**1j**)

**General procedure C:** To a solution of 2-oxo-2-(*p*-tolyl)acetic acid (491.7 mg, 3.0 mmol, 1.2 equiv) and 1 drop of DMF in DCM (5 mL) was added oxalyl chloride (0.31 mL, 3.6 mmol, 1.44 equiv) dropwise. The yellow mixture was stirred at room temperature for 3 h. The solvent was removed under vacuum and the residue was dissolved in toluene (5 mL). The resulting solution was then added dropwise to a mixture of **S1** (908.4 mg, 2.5 mmol, 1.0 equiv) and  $\text{Et}_3\text{N}$  (0.51 g, 5 mmol, 2.0 equiv) in EtOAc (5 mL) at 0 °C. The mixture was stirred at room temperature for 12 h. An aqueous solution of HCl (1 M) was added to the mixture until a clear organic layer was obtained. The organic phase was separated and the aqueous layer was extracted with EtOAc ( $2 \times 15$  mL). The combined organic layer was washed with brine and dried over anhydrous  $\text{Na}_2\text{SO}_4$ . The desired product **1j** (844.3 mg, 66%) was obtained as a white solid after purification by silica gel chromatography (PE / EtOAc = 5 / 1).

$^1\text{H}$  NMR (400 MHz,  $\text{CDCl}_3$ )  $\delta$  7.58 (d,  $J = 7.9$  Hz, 2H), 7.24 – 7.10 (m, 13H), 7.09 – 7.00 (m, 4H), 4.69 (d,  $J = 10.1$  Hz, 2H), 2.24 (s, 3H).

$^{13}\text{C}$  NMR (100 MHz,  $\text{CDCl}_3$ )  $\delta$  187.3, 169.2 (d,  $J = 9.6$  Hz), 149.8 (d,  $J = 6.5$  Hz), 145.5, 131.8, 130.5, 130.0, 129.7, 129.5, 128.7, 128.2, 125.9, 122.1, 120.2 (d,  $J = 5.1$  Hz), 84.7, 83.3, 35.1, 21.9.

$^{31}\text{P}$  NMR (162 MHz,  $\text{CDCl}_3$ )  $\delta$  -10.2.

**HRMS** (ESI<sup>+</sup>)  $m/z$  calc'd for C<sub>30</sub>H<sub>25</sub>NO<sub>5</sub>P [M+H]<sup>+</sup>: 510.1465, found 510.1467.

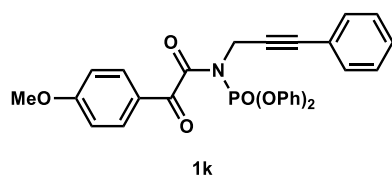

**Diphenyl (2-(4-methoxyphenyl)-2-oxoacetyl)(3-phenylprop-2-yn-1-yl)phosphoramidate (1k)**

The general procedure C was followed. The reaction was performed with 2-(4-methoxyphenyl)-2-oxoacetic acid (432.4 mg, 2.4 mmol, 1.2 equiv), oxalyl chloride (0.24 mL, 2.9 mmol, 1.44 equiv), **S1** (726.7 mg, 2.0 mmol, 1.0 equiv), and Et<sub>3</sub>N (0.55 mL) in EtOAc (2 mL) and toluene (2 mL) at room temperature for 14 h. The desired product **1k** (432.3 mg, 43%) was obtained as a yellow liquid after purification by silica gel chromatography.  $R_f$  = 0.6 (PE / EtOAc = 2 / 1).

**<sup>1</sup>H NMR** (400 MHz, CDCl<sub>3</sub>)  $\delta$  7.65 (d,  $J$  = 8.5 Hz, 2H), 7.24 – 7.10 (s, 13H), 7.09 – 7.00 (m, 2H), 6.71 (d,  $J$  = 8.5 Hz, 2H), 4.69 (d,  $J$  = 10.2 Hz, 2H), 3.68 (s, 3H).

**<sup>13</sup>C NMR** (100 MHz, CDCl<sub>3</sub>)  $\delta$  186.4, 169.3 (d,  $J$  = 9.1 Hz), 164.5, 149.8 (d,  $J$  = 6.7 Hz), 131.9, 131.8, 129.89, 129.86, 128.7, 128.2, 125.9, 122.1, 120.2 (d,  $J$  = 5.2 Hz), 114.2, 84.6, 83.4, 55.6, 35.2.

**<sup>31</sup>P NMR** (162 MHz, CDCl<sub>3</sub>)  $\delta$  -10.2.

**HRMS** (ESI<sup>+</sup>)  $m/z$  calc'd for C<sub>30</sub>H<sub>25</sub>NO<sub>6</sub>P [M+H]<sup>+</sup>: 526.1414, found 526.1413.

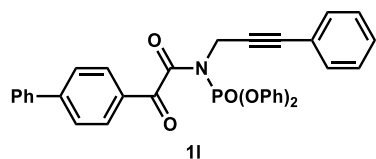

**Diphenyl (2-([1,1'-biphenyl]-4-yl)-2-oxoacetyl)(3-phenylprop-2-yn-1-yl)phosphoramidate (1l)**

The general procedure C was followed. The reaction was performed with 2-([1,1'-biphenyl]-4-yl)-2-oxoacetic acid (657.2 mg, 3.0 mmol, 1.5 equiv), oxalyl chloride (0.45 mL, 3.6 mmol, 1.8 equiv), **S1** (725.4 mg, 2.0 mmol, 1.0 equiv), and Et<sub>3</sub>N (0.55 mL) in EtOAc (2 mL) and toluene (2 mL) at room temperature for 14 h. The desired product **1l** (456.8 mg, 40%) was obtained as a yellow liquid after purification by silica gel chromatography.  $R_f$  = 0.5 (PE / EtOAc = 5 / 1).

**<sup>1</sup>H NMR** (400 MHz, CDCl<sub>3</sub>)  $\delta$  7.76 (d,  $J$  = 8.0 Hz, 2H), 7.51 – 7.44 (m, 4H), 7.41 – 7.34 (m, 2H), 7.34 – 7.28 (m, 1H), 7.26 – 7.12 (m, 13H), 7.11 – 7.05 (m, 2H), 4.73 (d,  $J$  = 10.0 Hz, 2H).

$^{13}\text{C}$  NMR (100 MHz,  $\text{CDCl}_3$ )  $\delta$  187.3, 169.2 (d,  $J = 9.8$  Hz), 149.8 (d,  $J = 6.6$  Hz), 147.0, 139.8, 131.9, 131.7, 130.1, 130.0, 129.1, 128.8, 128.6, 128.3, 127.5, 127.4, 126.0, 122.1, 120.2 (d,  $J = 5.1$  Hz), 85.5, 83.3, 35.2.

$^{31}\text{P}$  NMR (162 MHz,  $\text{CDCl}_3$ )  $\delta$  -10.2.

HRMS (ESI $^+$ )  $m/z$  calc'd for  $\text{C}_{35}\text{H}_{27}\text{NO}_5\text{P}$   $[\text{M}+\text{H}]^+$ : 572.1621, found 572.1617.

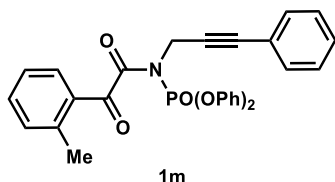

### Diphenyl (2-oxo-2-(*o*-tolyl)acetyl)(3-phenylprop-2-yn-1-yl)phosphoramidate (**1m**)

The general procedure C was followed. The reaction was performed with 2-oxo-2-(*o*-tolyl)acetic acid (492.0 mg, 3.0 mmol, 1.5 equiv), oxalyl chloride (0.48 mL, 5.4 mmol, 2.7 equiv), **S1** (726.7 mg, 2.0 mmol, 1.0 equiv), and  $\text{Et}_3\text{N}$  (0.55 mL) in EtOAc (2 mL) and toluene (2 mL) at room temperature for 14 h. The desired product **1m** (771.0 mg, 76%) was obtained as a yellow liquid after purification by silica gel chromatography.  $R_f = 0.7$  (PE / EtOAc = 2 / 1).

$^1\text{H}$  NMR (400 MHz,  $\text{CDCl}_3$ )  $\delta$  7.40 (d,  $J = 7.9$  Hz, 1H), 7.33 – 7.26 (m, 1H), 7.24 – 7.14 (m, 9H), 7.15 – 7.05 (m, 7H), 7.02 – 6.92 (m, 1H), 4.69 (d,  $J = 10.0$  Hz, 2H), 2.58 (s, 3H).

$^{13}\text{C}$  NMR (100 MHz,  $\text{CDCl}_3$ )  $\delta$  189.2, 169.4 (d,  $J = 10.6$  Hz), 149.9 (d,  $J = 6.6$  Hz), 141.9, 133.3, 132.5, 132.4, 131.9, 131.2, 130.0, 128.7, 128.3, 126.0 (d,  $J = 1.2$  Hz), 125.8, 122.2, 120.2 (d,  $J = 5.2$  Hz), 84.6, 83.2, 35.0, 21.8.

$^{31}\text{P}$  NMR (162 MHz,  $\text{CDCl}_3$ )  $\delta$  -10.1.

HRMS (ESI $^+$ )  $m/z$  calc'd for  $\text{C}_{30}\text{H}_{25}\text{NO}_5\text{P}$   $[\text{M}+\text{H}]^+$ : 510.1465, found 510.1465.

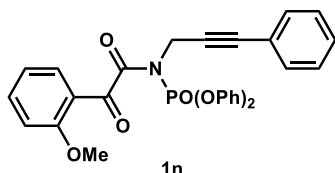

### Diphenyl (2-(2-methoxyphenyl)-2-oxoacetyl)(3-phenylprop-2-yn-1-yl)phosphoramidate (**1n**)

The general procedure C was followed. The reaction was performed with 2-oxo-2-(*o*-tolyl)acetic acid (540.1 mg, 3.0 mmol, 1.5 equiv), oxalyl chloride (0.48 mL, 5.4 mmol, 2.7 equiv), **S1** (726.7 mg, 2.0 mmol, 1.0 equiv), and  $\text{Et}_3\text{N}$  (0.55 mL) in EtOAc (2 mL) and toluene

(2 mL) at room temperature for 14 h. The desired product **1n** (750.2 mg, 71%) was obtained as a yellow liquid after purification by silica gel chromatography.  $R_f = 0.7$  (PE / EtOAc = 2 / 1).

$^1\text{H NMR}$  (400 MHz,  $\text{CDCl}_3$ )  $\delta$  7.95 (dd,  $J = 7.8, 1.9$  Hz, 1H), 7.47 – 7.38 (m, 1H), 7.31 – 7.15 (m, 13H), 7.13 – 7.03 (m, 2H), 6.96 (t,  $J = 7.5$  Hz, 1H), 6.75 (d,  $J = 8.4$  Hz, 1H), 4.66 (d,  $J = 10.4$  Hz, 2H), 3.49 (s, 3H).

$^{13}\text{C NMR}$  (100 MHz,  $\text{CDCl}_3$ )  $\delta$  185.9, 169.8 (d,  $J = 12.6$  Hz), 160.0, 150.2 (d,  $J = 6.7$  Hz), 136.2, 131.9, 130.7, 129.9, 128.7, 128.4, 125.7, 122.6, 122.5, 121.3, 120.1 (d,  $J = 5.3$  Hz), 112.0, 84.1, 83.6, 55.7, 34.3.

$^{31}\text{P NMR}$  (162 MHz,  $\text{CDCl}_3$ )  $\delta$  -10.2.

**HRMS** (ESI<sup>+</sup>)  $m/z$  calc'd for  $\text{C}_{30}\text{H}_{25}\text{NO}_6\text{P}$   $[\text{M}+\text{H}]^+$ : 526.1414, found 526.1413.

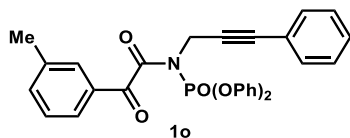

#### Diphenyl (2-oxo-2-(*m*-tolyl)acetyl)(3-phenylprop-2-yn-1-yl)phosphoramidate (**1o**)

The general procedure C was followed. The reaction was performed with 2-oxo-2-(*m*-tolyl)acetic acid (492.0 mg, 3.0 mmol, 1.5 equiv), oxalyl chloride (0.48 mL, 5.4 mmol, 2.7 equiv), **S1** (726.7 mg, 2.0 mmol, 1.0 equiv), and  $\text{Et}_3\text{N}$  (0.55 mL) in EtOAc (2 mL) and toluene (2 mL) at room temperature for 14 h. The desired product **1o** (801.4 mg, 79%) was obtained as a yellow liquid after purification by silica gel chromatography.  $R_f = 0.7$  (PE / EtOAc = 2 / 1).

$^1\text{H NMR}$  (400 MHz,  $\text{CDCl}_3$ ) 7.55 – 7.48 (m, 2H), 7.29 – 7.05 (m, 17H), 4.71 (d,  $J = 10.0$  Hz, 2H), 2.19 (s, 3H).

$^{13}\text{C NMR}$  (100 MHz,  $\text{CDCl}_3$ )  $\delta$  187.7, 169.1 (d,  $J = 10.2$  Hz), 149.6 (d,  $J = 6.5$  Hz), 138.5, 135.1, 132.8, 131.7, 129.84, 129.79, 128.62, 128.58, 128.1, 126.7, 125.8, 121.9, 120.0 (d,  $J = 5.1$  Hz), 84.5, 83.1, 34.8, 21.1.

$^{31}\text{P NMR}$  (162 MHz,  $\text{CDCl}_3$ )  $\delta$  -10.3.

**HRMS** (ESI<sup>+</sup>)  $m/z$  calc'd for  $\text{C}_{30}\text{H}_{25}\text{NO}_5\text{P}$   $[\text{M}+\text{H}]^+$ : 510.1465, found 510.1458.

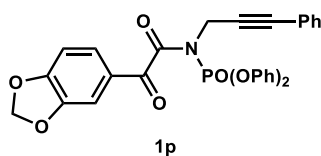

#### Diphenyl (2-(benzo[*d*][1,3]dioxol-5-yl)-2-oxoacetyl)(3-phenylprop-2-yn-1-

**yl)phosphoramidate (1p)**

The general procedure C was followed. The reaction was performed with 2-(benzo[*d*][1,3]dioxol-5-yl)-2-oxoacetic acid (510.0 mg, 2.64 mmol, 1.3 equiv), oxalyl chloride (0.45 mL, 5.4 mmol, 2.6 equiv), **S1** (726.7 mg, 2.0 mmol, 1.0 equiv), and Et<sub>3</sub>N (0.55 mL) in EtOAc (2 mL) and toluene (2 mL) at room temperature for 14 h. The desired product **1p** (759.9 mg, 70%) was obtained as a yellow liquid after purification by silica gel chromatography.  $R_f = 0.7$  (PE / EtOAc = 2 / 1).

**<sup>1</sup>H NMR** (400 MHz, CDCl<sub>3</sub>)  $\delta$  7.39 – 7.14 (m, 17H), 6.70 (d,  $J = 8.1$  Hz, 1H), 6.02 (s, 2H), 4.77 (d,  $J = 10.0$  Hz, 2H).

**<sup>13</sup>C NMR** (100 MHz, CDCl<sub>3</sub>)  $\delta$  186.0, 169.1 (d,  $J = 9.6$  Hz), 153.0, 149.9 (d,  $J = 6.7$  Hz), 148.5, 131.9, 130.0, 128.7, 128.3, 127.8, 127.1, 126.0 (d,  $J = 1.2$  Hz), 122.2, 120.3 (d,  $J = 5.1$  Hz), 108.5, 108.3, 102.2, 84.7, 83.3, 35.2.

**<sup>31</sup>P NMR** (162 MHz, CDCl<sub>3</sub>)  $\delta$  –10.3.

**HRMS** (ESI<sup>+</sup>)  $m/z$  calc'd for C<sub>30</sub>H<sub>23</sub>NO<sub>7</sub>P [M+H]<sup>+</sup>: 540.1207, found 540.1200.

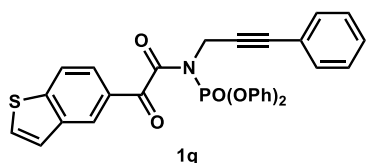

**Diphenyl (2-(benzo[*b*]thiophen-5-yl)-2-oxoacetyl)(3-phenylprop-2-yn-1-yl)phosphoramidate (1q)**

The general procedure C was followed. The reaction was performed with 2-(benzo[*b*]thiophen-5-yl)-2-oxoacetic acid (515.3 mg, 2.5 mmol, 1.25 equiv), oxalyl chloride (0.45 mL, 5.4 mmol, 2.6 equiv), **S1** (726.7 mg, 2.0 mmol, 1.0 equiv), and Et<sub>3</sub>N (0.55 mL) in EtOAc (2 mL) and toluene (2 mL) at room temperature for 13 h. The desired product **1q** (538.3 mg, 48%) was obtained as a yellow liquid after purification by silica gel chromatography.  $R_f = 0.6$  (PE / EtOAc = 2 / 1).

**<sup>1</sup>H NMR** (400 MHz, CDCl<sub>3</sub>)  $\delta$  8.16 (s, 1H), 7.89 – 7.78 (m, 2H), 7.47 (d,  $J = 5.5$  Hz, 1H), 7.35 – 7.10 (m, 16H), 4.84 (d,  $J = 10.0$  Hz, 2H).

**<sup>13</sup>C NMR** (100 MHz, CDCl<sub>3</sub>)  $\delta$  187.7, 169.3 (d,  $J = 9.7$  Hz), 149.8 (d,  $J = 6.6$  Hz), 145.6, 139.3, 131.9, 130.0, 129.6, 128.8, 128.3, 128.1, 126.2, 126.0, 124.7, 123.9, 123.0, 122.1, 120.2 (d,  $J = 5.2$  Hz), 83.3, 77.4.

**<sup>31</sup>P NMR** (162 MHz, CDCl<sub>3</sub>) –10.3

**HRMS** (ESI<sup>+</sup>)  $m/z$  calc'd for C<sub>31</sub>H<sub>23</sub>NO<sub>7</sub>PS [M+H]<sup>+</sup>: 552.1029, found 552.1028.

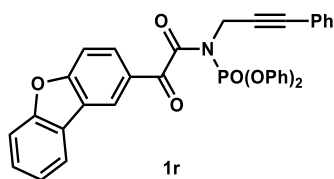

**Diphenyl (2-(dibenzo[*b,d*]furan-2-yl)-2-oxoacetyl)(3-phenylprop-2-yn-1-yl)phosphoramidate (1r)**

The general procedure C was followed. The reaction was performed with 2-(dibenzo[*b,d*]furan-2-yl)-2-oxoacetic acid (721.3 mg, 2.5 mmol, 1.25 equiv), oxalyl chloride (0.45 mL, 5.4 mmol, 2.6 equiv), **S1** (725.2 mg, 2.0 mmol, 1.0 equiv), and Et<sub>3</sub>N (0.55 mL) in EtOAc (2 mL) and toluene (2 mL) at room temperature for 13 h. The desired product **1r** (876.7 mg, 72%) was obtained as a yellow liquid after purification by silica gel chromatography.  $R_f = 0.4$  (PE / EtOAc = 2 / 1).

**<sup>1</sup>H NMR** (400 MHz, CDCl<sub>3</sub>)  $\delta$  8.30 (d,  $J = 1.8$  Hz, 1H), 7.87 (dd,  $J = 8.6, 1.9$  Hz, 1H), 7.59 (d,  $J = 7.7$  Hz, 1H), 7.50 (d,  $J = 8.2$  Hz, 1H), 7.46 – 7.37 (m, 2H), 7.34 – 7.08 (m, 14H), 7.07 – 6.97 (m, 2H), 4.77 (d,  $J = 9.9$  Hz, 2H).

**<sup>13</sup>C NMR** (100 MHz, CDCl<sub>3</sub>)  $\delta$  187.0, 169.3, 159.6, 157.0, 149.7 (d,  $J = 6.3$  Hz), 132.0, 130.0, 129.0, 128.9, 128.4, 128.3, 126.0, 125.0, 123.5, 123.4, 123.2, 121.3, 120.1 (d,  $J = 5.1$  Hz), 112.3, 112.0, 89.2, 83.5, 35.4.

**<sup>31</sup>P NMR** (162 MHz, CDCl<sub>3</sub>) –10.3

**HRMS** (ESI<sup>+</sup>)  $m/z$  calc'd for C<sub>35</sub>H<sub>25</sub>NO<sub>6</sub>P [M+H]<sup>+</sup>: 586.1414, found 586.1413.

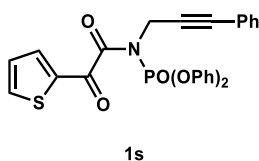

**Diphenyl (2-oxo-2-(thiophen-2-yl)acetyl)(3-phenylprop-2-yn-1-yl)phosphoramidate (1s)**

The general procedure C was followed. The reaction was performed with 2-oxo-2-(thiophen-2-yl)acetic acid (620.1 mg, 4.0 mmol, 2.0 equiv), oxalyl chloride (0.42 mL, 5.0 mmol, 2.5 equiv), **S1** (721.3 mg, 2.0 mmol, 1.0 equiv), and Et<sub>3</sub>N (0.55 mL) in EtOAc (2 mL) and toluene (2 mL) at room temperature for 13 h. The desired product **1s** (487.3 mg, 49%) was obtained as a purple liquid after purification by silica gel chromatography.  $R_f = 0.4$  (PE / EtOAc = 2 / 1).

**<sup>1</sup>H NMR** (400 MHz, CDCl<sub>3</sub>)  $\delta$  7.64 (dd,  $J = 4.9, 1.1$  Hz, 1H), 7.42 (dd,  $J = 3.9, 1.2$  Hz, 1H), 7.30 – 7.15 (m, 11H), 7.15 – 7.06 (m, 4H), 6.94 (dd,  $J = 4.9, 3.9$  Hz, 1H), 4.72 (d,  $J = 10.1$  Hz,

2H).

$^{13}\text{C}$  NMR (100 MHz,  $\text{CDCl}_3$ )  $\delta$  180.0, 167.9, 167.8, 149.9 (d,  $J = 6.7$  Hz), 139.8, 136.2, 135.9, 131.9, 130.0, 128.8, 128.5, 128.3, 126.0, 122.1, 120.3 (d,  $J = 5.1$  Hz), 84.9, 83.3, 35.7.

$^{31}\text{P}$  NMR (162 MHz,  $\text{CDCl}_3$ )  $\delta$  -10.2.

HRMS (ESI $^+$ )  $m/z$  calc'd for  $\text{C}_{27}\text{H}_{21}\text{NO}_5\text{PS}$   $[\text{M}+\text{H}]^+$ : 502.0878, found 502.0878.

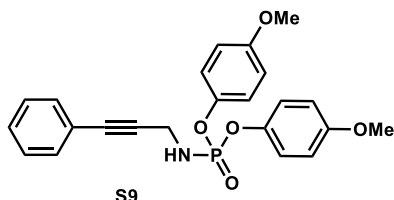

### Diphenyl (3-(6-methoxynaphthalen-2-yl)prop-2-yn-1-yl)phosphoramidate (S9)

The general procedure A was followed. The reaction was performed with CuI (19.0 mg, 0.10 mmol, 2 mol %),  $\text{Pd}(\text{PPh}_3)_2\text{Cl}_2$  (35.1 mg, 0.05 mmol, 1 mol %),  $\text{PPh}_3$  (52.5 mg, 0.20 mmol, 4 mol %), iodobenzene (1.12 g, 5.5 mmol, 1.1 equiv) and bis(4-methoxyphenyl) prop-2-yn-1-ylphosphoramidate (1.74 g, 5.0 mmol, 1.0 equiv) in 2,2,6,6-tetramethylpiperidine (1.5 mL) and toluene (7.5 mL) at room temperature for 20 h. The desired product **S9** (1.50 g, 71%) was obtained as a white solid after purification by silica gel chromatography.  $R_f = 0.5$  (PE / EtOAc = 1 / 1).

$^1\text{H}$  NMR (400 MHz,  $\text{CDCl}_3$ )  $\delta$  7.38 – 7.28 (m, 4H), 7.25 – 7.17 (m, 4H), 6.87 – 6.78 (m, 4H), 4.09 (dd,  $J = 11.6, 6.7$  Hz, 2H), 3.75 (s, 6H), 3.34 (brs, 1H).

$^{13}\text{C}$  NMR (101 MHz,  $\text{CDCl}_3$ )  $\delta$  156.8, 144.2 (d,  $J = 6.9$  Hz), 131.7, 128.5, 128.3, 122.5, 121.3 (d,  $J = 4.6$  Hz), 114.7, 85.8 (d,  $J = 6.8$  Hz), 83.9, 55.6, 32.2.

$^{31}\text{P}$  NMR (162 MHz,  $\text{CDCl}_3$ )  $\delta$  -1.0.

HRMS (ESI $^+$ )  $m/z$  calc'd for  $\text{C}_{23}\text{H}_{23}\text{NO}_5\text{P}$   $[\text{M}+\text{H}]^+$ : 424.1314, found 424.1310.

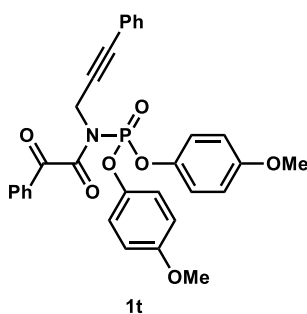

### Bis(4-methoxyphenyl) (2-oxo-2-phenylacetyl)(3-phenylprop-2-yn-1-yl)phosphoramidate (1t)

The general procedure C was followed. The reaction was performed with phenylglyoxylic acid



(0.39 g, 2.6 mmol, 1.3 equiv), oxalyl chloride (0.27 mL, 3.2 mmol, 1.6 equiv), **S9** (846.8 mg, 2.0 mmol, 1.0 equiv), and Et<sub>3</sub>N (0.55 mL) in EtOAc (2 mL) and toluene (2 mL) at room temperature for 12 h. The desired product **1t** (207.2 mg, 19%) was obtained as a yellow liquid after purification by silica gel chromatography.  $R_f = 0.6$  (PE / EtOAc = 2 / 1).

**<sup>1</sup>H NMR** (400 MHz, CDCl<sub>3</sub>)  $\delta$  7.71 – 7.65 (m, 2H), 7.51 – 7.37 (m, 1H), 7.28 (t,  $J = 7.6$  Hz, 2H), 7.26 – 7.11 (m, 4H), 7.10 – 7.00 (m, 5H), 6.68 (d,  $J = 8.7$  Hz, 4H), 4.68 (d,  $J = 9.9$  Hz, 2H), 3.64 (s, 6H).

**<sup>13</sup>C NMR** (100 MHz, CDCl<sub>3</sub>)  $\delta$  187.6, 169.2 (d,  $J = 9.4$  Hz), 157.3, 143.2 (d,  $J = 6.7$  Hz), 134.2, 132.9, 131.8, 129.5, 129.0, 128.7, 128.2, 122.1, 121.1 (d,  $J = 5.0$  Hz), 114.8, 84.6, 83.2, 55.6, 35.0.

**<sup>31</sup>P NMR** (162 MHz, CDCl<sub>3</sub>)  $\delta$  –9.7.

**HRMS** (ESI<sup>+</sup>)  $m/z$  calc'd for C<sub>31</sub>H<sub>27</sub>NO<sub>7</sub>P [M+H]<sup>+</sup>: 556.1520, found 556.1514.

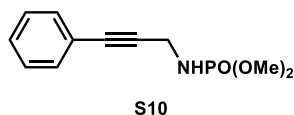

### Dimethyl (3-phenylprop-2-yn-1-yl)phosphoramidate (**S10**)

The general procedure A was followed. The reaction was performed with CuI (68.4 mg, 0.36 mmol, 3.6 mol %), PdCl<sub>2</sub> (44.0 mg, 0.25 mmol, 2.5 mol %), PPh<sub>3</sub> (131.0 mg, 0.50 mmol, 5 mol %), iodobenzene (2.24 g, 11.0 mmol, 1.1 equiv) and dimethyl prop-2-yn-1-ylphosphoramidate (1.63 g, 10.0 mmol, 1.0 equiv) in Et<sub>3</sub>N (10 mL) and THF (10 mL) at room temperature for 20 h. The desired product **S10** (1.10 g, 46%) was obtained as a white solid after purification by silica gel chromatography.  $R_f = 0.3$  (PE / EtOAc = 1 / 2).

**<sup>1</sup>H NMR** (400 MHz, CDCl<sub>3</sub>)  $\delta$  7.44 – 7.35 (m, 2H), 7.33 – 7.26 (m, 3H), 3.91 (dd,  $J = 11.8$ , 6.6 Hz, 2H), 3.76 (d,  $J = 11.3$  Hz, 6H), 3.25 (brs, 1H).

**<sup>13</sup>C NMR** (101 MHz, CDCl<sub>3</sub>)  $\delta$  131.7, 128.52, 128.45, 122.7, 86.6 (d,  $J = 5.9$  Hz), 83.3 (d,  $J = 5.2$  Hz), 53.3, 31.8.

**<sup>31</sup>P NMR** (162 MHz, CDCl<sub>3</sub>)  $\delta$  10.6.

**HRMS** (ESI<sup>+</sup>)  $m/z$  calc'd for C<sub>11</sub>H<sub>15</sub>NO<sub>3</sub>P [M+H]<sup>+</sup>: 240.0790, found 240.0786.

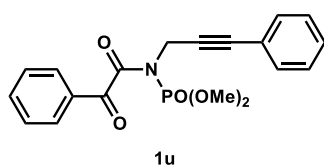

**Dimethyl (2-oxo-2-phenylacetyl)(3-phenylprop-2-yn-1-yl)phosphoramidate (1u)**

The general procedure C was followed. The reaction was performed with phenylglyoxylic acid (0.30 g, 2.0 mmol, 1.0 equiv), oxalyl chloride (0.20 mL, 2.4 mmol, 1.2 equiv), **S10** (478.4 mg, 2.0 mmol, 1.0 equiv), and Et<sub>3</sub>N (0.3 mL) in EtOAc (2 mL) and toluene (2 mL) at room temperature for 12 h. The desired product **1u** (317.2 mg, 43%) was obtained as a colorless liquid after purification by silica gel chromatography.  $R_f = 0.3$  (PE / EtOAc = 1 / 1).

<sup>1</sup>H NMR (400 MHz, CDCl<sub>3</sub>)  $\delta$  7.95 – 7.88 (m, 2H), 7.65 – 7.55 (m, 1H), 7.53 – 7.40 (m, 4H), 7.39 – 7.27 (m, 3H), 4.60 (d,  $J = 9.7$  Hz, 2H), 3.82 (d,  $J = 11.7$  Hz, 6H).

<sup>13</sup>C NMR (100 MHz, CDCl<sub>3</sub>)  $\delta$  188.2, 169.5 (d,  $J = 11.4$  Hz), 134.2, 133.1, 131.8, 129.4, 128.84, 128.77, 128.4, 122.2, 83.7, 83.5, 54.6 (d,  $J = 4.9$  Hz), 34.0.

<sup>31</sup>P NMR (162 MHz, CDCl<sub>3</sub>)  $\delta$  2.0.

HRMS (ESI<sup>+</sup>)  $m/z$  calc'd for C<sub>19</sub>H<sub>19</sub>NO<sub>5</sub>P [M+H]<sup>+</sup>: 372.0995, found 372.0989.

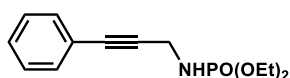

S11

**Diethyl (3-phenylprop-2-yn-1-yl)phosphoramidate (S11)**

The general procedure A was followed. The reaction was performed with CuI (34.2 mg, 0.18 mmol, 3.6 mol %), PdCl<sub>2</sub> (22.0 mg, 0.13 mmol, 2.5 mol %), PPh<sub>3</sub> (65.5 mg, 0.25 mmol, 5 mol %), iodobenzene (1.12 g, 5.5 mmol, 1.1 equiv) and diethyl prop-2-yn-1-ylphosphoramidate (1.46 g, 5.0 mmol, 1.0 equiv) in Et<sub>3</sub>N (5 mL) and THF (5 mL) at room temperature for 20 h. The desired product **S11** (1.98 g, 90%) was obtained as a brown liquid after purification by silica gel chromatography.  $R_f = 0.5$  (DCM / EtOAc = 1 / 2).

<sup>1</sup>H NMR (400 MHz, CDCl<sub>3</sub>)  $\delta$  7.44 – 7.34 (m, 2H), 7.34 – 7.28 (m, 3H), 4.13 (p,  $J = 7.2$  Hz, 4H), 3.93 (dd,  $J = 11.4, 6.8$  Hz, 2H), 2.95 (brs, 1H), 1.35 (t,  $J = 7.1$  Hz, 6H).

<sup>13</sup>C NMR (101 MHz, CDCl<sub>3</sub>)  $\delta$  131.7, 128.54, 128.49, 122.8, 86.0, 83.3, 62.7 (d,  $J = 5.0$  Hz), 31.6, 16.3 (d,  $J = 7.0$  Hz).

<sup>31</sup>P NMR (162 MHz, CDCl<sub>3</sub>)  $\delta$  7.8.

HRMS (ESI<sup>+</sup>)  $m/z$  calc'd for C<sub>13</sub>H<sub>19</sub>NO<sub>3</sub>P [M+H]<sup>+</sup>: 268.1103, found 268.1103.

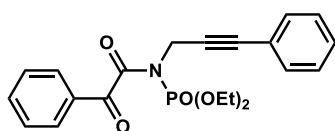

1v

**Diethyl (2-oxo-2-phenylacetyl)(3-phenylprop-2-yn-1-yl)phosphoramidate (1v)**

The general procedure C was followed. The reaction was performed with phenylglyoxylic acid (0.60 g, 4.0 mmol, 1.0 equiv), oxalyl chloride (0.4 mL, 4.8 mmol, 1.2 equiv), **S11** (1.07 g, 4.0 mmol, 1.0 equiv), and Et<sub>3</sub>N (1.0 mL) in EtOAc (10 mL) and toluene (10 mL) at room temperature for 12 h. The desired product **1v** (660.0 mg, 41%) was obtained as a yellow liquid after purification by silica gel chromatography. R<sub>f</sub> = 0.5 (PE / EtOAc = 2 / 1).

<sup>1</sup>H NMR (400 MHz, CDCl<sub>3</sub>) δ 7.96 – 7.85 (m, 2H), 7.66 – 7.55 (m, 1H), 7.55 – 7.40 (m, 4H), 7.38 – 7.28 (m, 3H), 4.60 (d, *J* = 9.5 Hz, 2H), 4.19 (p, *J* = 7.2 Hz, 4H), 1.35 – 1.27 (m, 6H).

<sup>13</sup>C NMR (100 MHz, CDCl<sub>3</sub>) δ 188.3, 169.7 (d, *J* = 11.4 Hz), 134.2, 133.4, 131.9, 129.5, 128.9, 128.8, 128.5, 122.5, 83.7, 83.6, 64.8 (d, *J* = 5.0 Hz), 34.1, 16.0 (d, *J* = 7.2 Hz).

<sup>31</sup>P NMR (162 MHz, CDCl<sub>3</sub>) δ -1.1.

HRMS (ESI<sup>+</sup>) *m/z* calc'd for C<sub>21</sub>H<sub>23</sub>NO<sub>5</sub>P [M+H]<sup>+</sup>: 400.1308, found 400.1317.

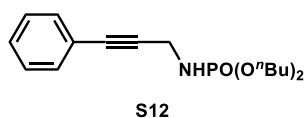**Dibutyl (3-phenylprop-2-yn-1-yl)phosphoramidate (S12)**

The general procedure A was followed. The reaction was performed with CuI (34.1 mg, 0.18 mmol, 3.6 mol %), PdCl<sub>2</sub> (22.0 mg, 0.13 mmol, 2.5 mol %), PPh<sub>3</sub> (65.4 mg, 0.25 mmol, 5 mol %), iodobenzene (1.12 g, 5.5 mmol, 1.1 equiv) and dibutyl prop-2-yn-1-ylphosphoramidate (1.23 g, 5.0 mmol, 1.0 equiv) in Et<sub>3</sub>N (5 mL) and THF (5 mL) at room temperature for 20 h. The desired product **S12** (1.25 g, 77%) was obtained as a brown liquid after purification by silica gel chromatography. R<sub>f</sub> = 0.5 (DCM / EtOAc = 2 / 1).

<sup>1</sup>H NMR (400 MHz, CDCl<sub>3</sub>) δ 7.40 – 7.36 (m, 2H), 7.34 – 7.28 (m, 3H), 4.05 (q, *J* = 6.6 Hz, 4H), 3.91 (dd, *J* = 11.4, 6.9 Hz, 2H), 3.11 (brs, 1H), 1.67 (dq, *J* = 8.7, 6.7 Hz, 4H), 1.47 – 1.33 (m, 4H), 0.91 (t, *J* = 7.4 Hz, 6H).

<sup>13</sup>C NMR (101 MHz, CDCl<sub>3</sub>) δ 131.7, 128.5, 128.4, 122.8, 86.8 (d, *J* = 6.3 Hz), 83.2, 66.5 (d, *J* = 5.4 Hz), 32.5 (d, *J* = 7.2 Hz), 31.9, 18.9, 13.8.

<sup>31</sup>P NMR (162 MHz, CDCl<sub>3</sub>) δ 8.0.

HRMS (ESI<sup>+</sup>) *m/z* calc'd for C<sub>17</sub>H<sub>27</sub>NO<sub>3</sub>P [M+H]<sup>+</sup>: 324.1729, found 324.1733.

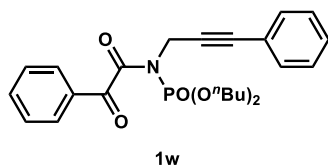

### Dibutyl (2-oxo-2-phenylacetyl)(3-phenylprop-2-yn-1-yl)phosphoramidate (**1w**)

The general procedure C was followed. The reaction was performed with phenylglyoxylic acid (787.5 mg, 5.3 mmol, 1.5 equiv), oxalyl chloride (0.6 mL, 7.0 mmol, 2.0 equiv), **S12** (1.13 g, 3.5 mmol, 1.0 equiv), and Et<sub>3</sub>N (3.5 mL) in DCM (15 mL) at room temperature for 12 h. The desired product **1w** (608.6 mg, 42%) was obtained as a yellow liquid after purification by silica gel chromatography.  $R_f = 0.5$  (PE / EtOAc = 5 / 1).

<sup>1</sup>H NMR (400 MHz, CDCl<sub>3</sub>) δ 7.94 – 7.87 (m, 2H), 7.62 – 7.55 (d,  $J = 7.5$  Hz, 1H), 7.53 – 7.39 (m, 4H), 7.35 – 7.29 (m, 3H), 4.59 (d,  $J = 9.5$  Hz, 2H), 4.11 (q,  $J = 6.8$  Hz, 4H), 1.62 (dq,  $J = 9.0, 6.4$  Hz, 4H), 1.34 (h,  $J = 7.4$  Hz, 4H), 0.86 (t,  $J = 7.4$  Hz, 6H).

<sup>13</sup>C NMR (100 MHz, CDCl<sub>3</sub>) δ 188.2, 169.6 (d,  $J = 11.3$  Hz), 134.2, 133.3, 131.8, 129.4, 128.8, 128.7, 128.4, 122.4, 83.7, 83.5, 68.3 (d,  $J = 5.3$  Hz), 34.0, 32.0 (d,  $J = 7.1$  Hz), 18.6, 13.5.

<sup>31</sup>P NMR (162 MHz, CDCl<sub>3</sub>) δ –0.8.

HRMS (ESI<sup>+</sup>)  $m/z$  calc'd for C<sub>25</sub>H<sub>31</sub>NO<sub>5</sub>P [M+H]<sup>+</sup>: 456.1934, found 456.1928.

## IV. General Procedures for Synthesis of $\alpha$ -Hydroxy- $\gamma$ -Lactams by Ni-catalyzed *Syn*-Hydrometalative Cyclization of Alkyne-tethered Ketoamides and Characterization Data

Please note that the absolute configuration was determined only for the lactam **2b** via X-ray analysis (*vide infra*). The absolute configuration for all other products **2** was inferred by analogy.

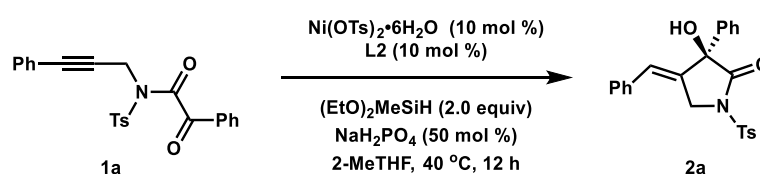

### (*R,E*)-4-Benzylidene-3-hydroxy-3-phenyl-1-tosylpyrrolidin-2-one (**2a**)

**General procedure:** To a Schlenk tube were added Ni(OTs)<sub>2</sub>·6H<sub>2</sub>O (5.1 mg, 0.01 mmol, 10 mol %), **L2** (3.1 mg, 0.01 mmol, 10 mol %), and 0.5 mL of 2-MeTHF under Ar. The resultant solution was stirred at room temperature for 20 min, then **1a** (41.7 mg, 0.1 mmol, 1.0 equiv),

NaH<sub>2</sub>PO<sub>4</sub> (6.0 mg, 0.5 equiv), (EtO)<sub>2</sub>MeSiH (32 μL, 0.2 mmol, 2.0 equiv) and another 0.5 mL of 2-MeTHF were added. The tube was sealed and the mixture was stirred at 40 °C for 12 h. After the reaction was cooled to room temperature, the mixture was filtered through a celite pad and the solid was washed with EtOAc (5 mL × 3). After the collected solvents were removed under reduced pressure, the residue was purified by silica gel column chromatography to provide **2a** (23.5 mg, 56%) as a white solid. er = 91 : 9. [α]<sub>D</sub><sup>25</sup> = +7.12 (c 1.6, CHCl<sub>3</sub>). R<sub>f</sub> = 0.5 (PE : EtOAc = 5 : 1).

<sup>1</sup>H NMR (400 MHz, CDCl<sub>3</sub>) δ 7.85 (d, *J* = 8.1 Hz, 2H), 7.37 – 7.20 (m, 10H), 7.20 – 7.12 (m, 2H), 6.84 (d, *J* = 2.4 Hz, 1H), 4.68 – 4.56 (m, 2H) 3.13 (brs, 1H), 2.35 (s, 3H).

<sup>13</sup>C NMR (100 MHz, CDCl<sub>3</sub>) δ 172.4, 145.9, 139.6, 134.69, 134.67, 132.7, 130.0, 129.12, 129.09, 129.0, 128.9, 128.5, 128.3, 127.9, 125.5, 79.7, 48.6, 21.8.

HRMS (ESI<sup>+</sup>) *m/z* calc'd for C<sub>24</sub>H<sub>22</sub>O<sub>4</sub>NS [M+H]<sup>+</sup>: 420.1264, found 420.1271.

**HPLC conditions:** hexane/2-propanol 60 : 40, 1.0 mL/min, λ = 254 nm, Chiralpak IB column (4.6 mm x 250 mm), t<sub>r</sub> (major) = 7.0 min, t<sub>r</sub> (minor) = 10.4 min.

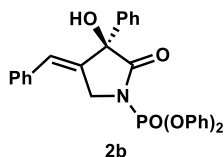

**Diphenyl (R,E)-(4-benzylidene-3-hydroxy-2-oxo-3-phenylpyrrolidin-1-yl)phosphonate (2b)**

Following the general procedure, the reaction was performed with **1b** (49.5 mg, 0.1 mmol, 1.0 equiv), Ni(OTf)<sub>2</sub>•6H<sub>2</sub>O (5.1 mg, 0.01 mmol, 10 mol %), **L2** (3.1 mg, 0.01 mmol, 10 mol %), NaH<sub>2</sub>PO<sub>4</sub> (6.0 mg, 0.5 equiv) and (EtO)<sub>2</sub>MeSiH (32 μL, 0.2 mmol, 2.0 equiv) in 1.0 mL of 2-MeTHF at 40 °C for 12 h. The desired product **2b** was obtained in 73% yield (36.0 mg) as a white solid. er = 94.5 :5.5. [α]<sub>D</sub><sup>25</sup> = +56.94 (c 0.2, CHCl<sub>3</sub>). R<sub>f</sub> = 0.6 (PE : EtOAc = 2 : 1).

<sup>1</sup>H NMR (400 MHz, CDCl<sub>3</sub>) δ 7.41 – 7.27 (m, 12H), 7.25 – 7.15 (m, 6H), 7.13 – 7.08 (m, 2H), 6.86 (dd, *J* = 2.7, 1.6 Hz, 1H), 4.68 (dt, *J* = 14.5, 1.6 Hz, 1H), 4.51 (dd, *J* = 14.5, 2.7 Hz, 1H), 3.28 (brs, 1H).

<sup>13</sup>C NMR (100 MHz, CDCl<sub>3</sub>) δ 176.2, 149.9 (d, *J* = 7.2 Hz), 149.6 (d, *J* = 6.7 Hz), 140.0, 134.8, 134.4 (d, *J* = 8.6 Hz), 130.1, 130.0, 129.0, 128.94, 128.92, 128.88, 128.4, 128.0, 126.1 (d, *J* = 1.7 Hz), 126.0 (d, *J* = 1.5 Hz), 125.7, 120.7 (d, *J* = 4.6 Hz), 120.5 (d, *J* = 4.8 Hz), 79.5 (d, *J* = 8.8 Hz), 49.6 (d, *J* = 5.4 Hz).

<sup>31</sup>P NMR (162 MHz, CDCl<sub>3</sub>) δ -12.5.

HRMS (ESI<sup>+</sup>) *m/z* calc'd for C<sub>29</sub>H<sub>25</sub>O<sub>5</sub>NP [M+H]<sup>+</sup>: 498.1465, found 498.1473.

HPLC conditions: hexane/2-propanol 80 : 20, 1.0 mL/min, λ = 254 nm, Chiralpak IB column (4.6 mm x 250 mm), *t<sub>r</sub>* (major) = 6.4 min, *t<sub>r</sub>* (minor) = 7.5 min.

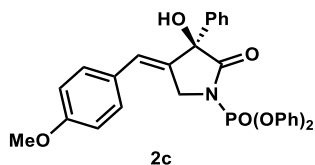

**Diphenyl (R,E)-3-hydroxy-4-(4-methoxybenzylidene)-2-oxo-3-phenylpyrrolidin-1-yl)phosphonate (2c)**

Following the general procedure, the reaction was performed with **1c** (103.4 mg, 0.2 mmol, 1.0 equiv), Ni(OTf)<sub>2</sub>·6H<sub>2</sub>O (10.1 mg, 0.020 mmol, 10 mol %), **L2** (6.1 mg, 0.020 mmol, 10 mol %), NaH<sub>2</sub>PO<sub>4</sub> (12.0 mg, 0.5 equiv) and (EtO)<sub>2</sub>MeSiH (64 μL, 0.4 mmol, 2.0 equiv) in 2.0 mL of 2-MeTHF at 40 °C for 12 h. The desired product **2c** was obtained in 62% yield (64.1 mg) as a colorless liquid. er = 93 : 7. [α]<sub>D</sub><sup>25</sup> = +42.20 (c 0.5, CHCl<sub>3</sub>). R<sub>f</sub> = 0.6 (PE : EtOAc = 2 : 1).

<sup>1</sup>H NMR (400 MHz, CDCl<sub>3</sub>) δ 7.28 – 7.16 (m, 9H), 7.14 – 7.07 (m, 3H), 7.07 – 6.96 (m, 5H), 6.78 (d, *J* = 8.6 Hz, 2H), 6.66 (dd, *J* = 1.5, 2.7 Hz, 1H), 4.58 (dt, *J* = 14.4, 1.5 Hz, 1H), 4.40 (dd, *J* = 14.4, 2.7 Hz, 1H), 3.71 (s, 3H), 3.43 (brs, 1H).

<sup>13</sup>C NMR (100 MHz, CDCl<sub>3</sub>) δ 176.3, 159.4, 149.7 (d, *J* = 7.0 Hz), 149.5 (d, *J* = 6.6 Hz), 140.1, 131.9 (d, *J* = 8.5 Hz), 130.2, 129.9, 129.8, 128.8, 128.6, 127.5, 127.4, 125.84, 125.76, 125.6, 120.5 (d, *J* = 4.6 Hz), 120.4 (d, *J* = 4.7 Hz), 114.1, 79.3 (d, *J* = 8.8 Hz), 55.3, 49.6 (d, *J* = 5.4 Hz).

<sup>31</sup>P NMR (162 MHz, CDCl<sub>3</sub>) δ -12.6.

HRMS (ESI<sup>+</sup>) *m/z* calc'd for C<sub>30</sub>H<sub>27</sub>NO<sub>6</sub>P [M+H]<sup>+</sup>: 528.1571, found 528.1572.

HPLC conditions: hexane/2-propanol 85 : 15, 1.0 mL/min, λ = 280 nm, Chiralcel OD-H column (4.6 mm x 250 mm), *t<sub>r</sub>* (major) = 10.5 min, *t<sub>r</sub>* (minor) = 12.9 min.

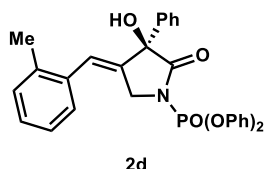

**Diphenyl (R,E)-3-hydroxy-4-(2-methylbenzylidene)-2-oxo-3-phenylpyrrolidin-1-yl)phosphonate (2d)**

Following the general procedure, the reaction was performed with **1d** (81.5 mg, 0.2 mmol, 1.0

equiv), Ni(OTs)<sub>2</sub>•6H<sub>2</sub>O (10.1 mg, 0.020 mmol, 10 mol %), **L2** (6.1 mg, 0.020 mmol, 10 mol %), NaH<sub>2</sub>PO<sub>4</sub> (12.0 mg, 0.5 equiv) and (EtO)<sub>2</sub>MeSiH (64 μL, 0.4 mmol, 2.0 equiv) in 2.0 mL of 2-MeTHF at 40 °C for 12 h. The desired product **2d** was obtained in 75% yield (63.0 mg) as a yellow liquid. er = 92.5 : 7.5. [α]<sub>D</sub><sup>25</sup> = +44.65 (c 2.7, CHCl<sub>3</sub>). R<sub>f</sub> = 0.6 (PE : EtOAc = 2 : 1).

<sup>1</sup>H NMR (400 MHz, CDCl<sub>3</sub>) δ 7.43 – 7.36 (m, 2H), 7.36 – 7.25 (m, 7H), 7.25 – 7.14 (m, 7H), 7.13 – 7.06 (m, 2H), 7.04 – 6.97 (m, 2H), 4.49 (d, *J* = 14.3 Hz, 1H), 4.37 (dd, *J* = 14.3, 2.6 Hz, 1H), 3.26 (brs, 1H), 2.27 (s, 3H).

<sup>13</sup>C NMR (100 MHz, CDCl<sub>3</sub>) δ 176.5 (d, *J* = 1.8 Hz), 149.9 (d, *J* = 7.0 Hz), 149.6 (d, *J* = 6.7 Hz), 139.7, 136.9, 135.1 (d, *J* = 8.4 Hz), 133.6, 130.5, 130.0, 129.9, 129.0, 128.9, 128.5, 128.2, 126.4, 126.1, 126.0 (d, *J* = 1.5 Hz), 125.9, 125.8, 120.6 (d, *J* = 4.6 Hz), 120.5 (d, *J* = 4.7 Hz), 79.4 (d, *J* = 8.8 Hz), 49.2 (d, *J* = 5.2 Hz), 19.9.

<sup>31</sup>P NMR (162 MHz, CDCl<sub>3</sub>) δ -12.4.

HRMS (ESI<sup>+</sup>) *m/z* calc'd for C<sub>30</sub>H<sub>27</sub>NO<sub>5</sub>P [M+H]<sup>+</sup>: 512.1621, found 512.1622.

HPLC conditions: hexane/2-propanol 85 : 15, 1.0 mL/min, λ = 254 nm, Chiralcel OD-H column (4.6 mm x 250 mm), t<sub>r</sub> (major) = 7.5 min, t<sub>r</sub> (minor) = 9.1 min.

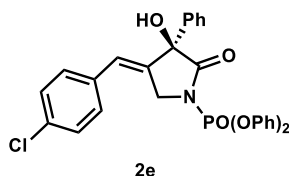

**Diphenyl (R,E)-(4-(4-chlorobenzylidene)-3-hydroxy-2-oxo-3-phenylpyrrolidin-1-yl)phosphonate (2e)**

Following the general procedure, the reaction was performed with **1e** (52.5 mg, 0.1 mmol, 1.0 equiv), Ni(OTs)<sub>2</sub>•6H<sub>2</sub>O (5.1 mg, 0.010 mmol, 10 mol %), **L2** (3.1 mg, 0.010 mmol, 10 mol %), NaH<sub>2</sub>PO<sub>4</sub> (6.0 mg, 0.5 equiv) and (EtO)<sub>2</sub>MeSiH (32 μL, 0.2 mmol, 1.0 equiv) in 1.0 mL of 2-MeTHF at 40 °C for 12 h. The desired product **2e** was obtained in 65% yield (34.2 mg) as a yellow liquid. er = 94 : 6. [α]<sub>D</sub><sup>25</sup> = +40.82 (c 0.6, CHCl<sub>3</sub>). R<sub>f</sub> = 0.6 (PE : EtOAc = 2 : 1).

<sup>1</sup>H NMR (400 MHz, CDCl<sub>3</sub>) δ 7.37 – 7.25 (m, 11H), 7.24 – 7.16 (m, 4H), 7.14 – 7.08 (m, 4H), 6.80 (d, *J* = 2.5 Hz, 1H), 4.62 (d, *J* = 14.5 Hz, 1H), 4.47 (dd, *J* = 14.5, 2.7 Hz, 1H), 3.44 (brs, 1H).

<sup>13</sup>C NMR (100 MHz, CDCl<sub>3</sub>) δ 176.1 (d, *J* = 1.6 Hz), 149.9 (d, *J* = 7.1 Hz), 149.6 (d, *J* = 6.6 Hz), 139.9, 135.2 (d, *J* = 8.5 Hz), 134.3, 133.2, 130.12, 130.08, 130.0, 129.1, 129.0, 126.8,

126.1 (d,  $J = 1.7$  Hz), 126.0, 125.6, 120.6 (d,  $J = 4.6$  Hz), 120.5 (d,  $J = 4.8$  Hz), 79.5 (d,  $J = 9.0$  Hz), 49.5 (d,  $J = 5.4$  Hz).

$^{31}\text{P}$  NMR (162 MHz,  $\text{CDCl}_3$ )  $\delta$  -12.6.

HRMS (ESI<sup>+</sup>)  $m/z$  calc'd for  $\text{C}_{29}\text{H}_{24}\text{NO}_5\text{PCl}$   $[\text{M}+\text{H}]^+$ : 532.1075, found 532.1069.

HPLC conditions: hexane/2-propanol 85 : 15, 1.0 mL/min,  $\lambda = 280$  nm, Chiralcel OD-H column (4.6 mm x 250 mm),  $t_r$  (major) = 8.3 min,  $t_r$  (minor) = 10.7 min.

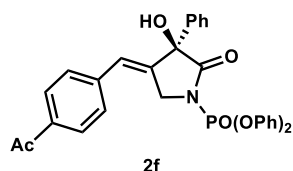

**Diphenyl (R,E)-4-(4-acetylbenzylidene)-3-hydroxy-2-oxo-3-phenylpyrrolidin-1-yl)phosphonate (2f)**

Following the general procedure, the reaction was performed with **1f** (103.8 mg, 0.2 mmol, 1.0 equiv),  $\text{Ni}(\text{OTf})_2 \cdot 6\text{H}_2\text{O}$  (10.2 mg, 0.020 mmol, 10 mol %), **L2** (6.1 mg, 0.020 mmol, 10 mol %),  $\text{NaH}_2\text{PO}_4$  (12.0 mg, 0.5 equiv) and  $(\text{EtO})_2\text{MeSiH}$  (64  $\mu\text{L}$ , 0.4 mmol, 2.0 equiv) in 2.0 mL of 2-MeTHF at 40 °C for 12 h. The desired product **2f** was obtained in 67% yield (41.8 mg) as a colorless liquid. er = 94.5 : 5.5.  $[\alpha]_{\text{D}}^{25} = +45.96$  (c 1.1,  $\text{CHCl}_3$ ).  $R_f = 0.4$  (PE : EtOAc = 2 : 1).

$^1\text{H}$  NMR (400 MHz,  $\text{CDCl}_3$ )  $\delta$  7.88 – 7.81 (m, 2H), 7.30 – 7.17 (m, 11H), 7.16 – 7.13 (m, 2H), 7.13 – 7.08 (m, 2H), 7.07 – 7.03 (m, 2H), 6.83 – 6.80 (m, 1H), 4.58 (dt,  $J = 14.7, 1.6$  Hz, 1H), 4.44 (dd,  $J = 14.6, 2.8$  Hz, 1H), 2.81 (brs, 1H), 2.52 (s, 3H).

$^{13}\text{C}$  NMR (100 MHz,  $\text{CDCl}_3$ )  $\delta$  197.5, 176.0, 149.8 (d,  $J = 7.0$  Hz), 149.6 (d,  $J = 6.6$  Hz), 139.8, 139.3, 137.3 (d,  $J = 8.6$  Hz), 136.4, 130.1, 130.0, 129.14, 129.08, 129.0, 128.9, 126.9, 126.12, 126.06, 125.5, 120.6 (d,  $J = 4.6$  Hz), 120.5 (d,  $J = 4.8$  Hz), 79.5 (d,  $J = 8.9$  Hz), 49.5 (d,  $J = 5.5$  Hz), 26.8.

$^{31}\text{P}$  NMR (162 MHz,  $\text{CDCl}_3$ )  $\delta$  -12.9.

HRMS (ESI<sup>+</sup>)  $m/z$  calc'd for  $\text{C}_{31}\text{H}_{27}\text{NO}_6\text{P}$   $[\text{M}+\text{H}]^+$ : 540.1571, found 540.1581.

HPLC conditions: hexane/2-propanol 85 : 15, 1.0 mL/min,  $\lambda = 280$  nm, Chiralcel OD-H column (4.6 mm x 250 mm),  $t_r$  (major) = 19.3 min,  $t_r$  (minor) = 24.9 min.

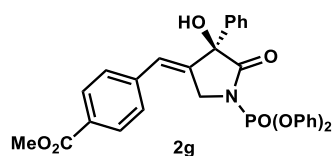



**Methyl (R,E)-4-((1-(diphenoxyphosphoryl)-4-hydroxy-5-oxo-4-phenylpyrrolidin-3-ylidene)methyl)benzoate (2g)**

Following the general procedure, the reaction was performed with **1g** (52.3 mg, 0.1 mmol, 1.0 equiv), Ni(OTs)<sub>2</sub>•6H<sub>2</sub>O (5.1 mg, 0.010 mmol, 10 mol %), **L2** (3.1 mg, 0.010 mmol, 10 mol %), NaH<sub>2</sub>PO<sub>4</sub> (6.0 mg, 0.5 equiv) and (EtO)<sub>2</sub>MeSiH (32 μL, 0.2 mmol, 2.0 equiv) in 1.0 mL of 2-MeTHF at 40 °C for 12 h. The desired product **2g** was obtained in 32% yield (17.0 mg) as a yellow liquid. er = 91.5 : 8.5. [α]<sub>D</sub><sup>25</sup> = +37.18 (c 1.0, CHCl<sub>3</sub>). R<sub>f</sub> = 0.7 (PE : EtOAc = 2 : 1).

<sup>1</sup>H NMR (400 MHz, CDCl<sub>3</sub>) δ 8.01 (d, *J* = 8.1 Hz, 2H), 7.39 – 7.25 (m, 12H), 7.25 – 7.17 (m, 3H), 7.16 – 7.08 (m, 2H), 6.89 (d, *J* = 2.2 Hz, 1H), 4.66 (dt, *J* = 14.7, 1.6 Hz, 1H), 4.52 (dd, *J* = 14.7, 2.8 Hz, 1H), 3.92 (s, 3H), 3.41 (brs, 1H).

<sup>13</sup>C NMR (100 MHz, CDCl<sub>3</sub>) δ 176.0, 166.7, 149.9 (d, *J* = 6.9 Hz), 149.6 (d, *J* = 6.7 Hz), 139.8, 139.1, 137.0 (d, *J* = 8.6 Hz), 130.10, 130.08, 130.0, 129.7, 129.14, 129.07, 128.8, 127.0, 126.1, 126.0, 125.5, 120.6 (d, *J* = 4.6 Hz), 120.5 (d, *J* = 4.7 Hz), 79.5 (d, *J* = 9.1 Hz), 52.4, 49.5 (d, *J* = 5.4 Hz).

<sup>31</sup>P NMR (162 MHz, CDCl<sub>3</sub>) δ –12.4.

HRMS (ESI<sup>+</sup>) *m/z* calc'd for C<sub>31</sub>H<sub>27</sub>NO<sub>7</sub>P [M+H]<sup>+</sup>: 556.1520, found 556.1516.

HPLC conditions: hexane/2-propanol 85 : 15, 1.0 mL/min, λ = 280 nm, Chiralcel OD-H column (4.6 mm x 250 mm), t<sub>r</sub> (major) = 12.3 min, t<sub>r</sub> (minor) = 15.8 min.

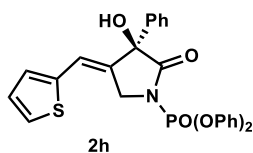**Diphenyl (R,E)-3-hydroxy-2-oxo-3-phenyl-4-(thiophen-2-ylmethylene)pyrrolidin-1-ylphosphonate (2h)**

Following the general procedure, the reaction was performed with **1h** (48.7 mg, 0.1 mmol, 1.0 equiv), Ni(OTs)<sub>2</sub>•6H<sub>2</sub>O (5.1 mg, 0.010 mmol, 10 mol %), **L2** (3.1 mg, 0.010 mmol, 10 mol %), NaH<sub>2</sub>PO<sub>4</sub> (6.1 mg, 0.5 equiv) and (EtO)<sub>2</sub>MeSiH (32 μL, 0.2 mmol, 2.0 equiv) in 1.0 mL of 2-MeTHF at 40 °C for 12 h. The desired product **2h** was obtained in 45% yield (21.8 mg) as a yellow liquid. er = 95 : 5. [α]<sub>D</sub><sup>25</sup> = +42.21 (c 1.0, CHCl<sub>3</sub>). R<sub>f</sub> = 0.7 (PE : EtOAc = 2 : 1).

<sup>1</sup>H NMR (400 MHz, CDCl<sub>3</sub>) δ 7.39 – 7.26 (m, 5H), 7.25 – 7.15 (m, 9H), 7.14 – 7.09 (m, 2H), 7.06 – 7.02 (m, 1H), 6.99 – 6.96 (m, 1H), 6.00 (s, 1H), 4.53 (AB, *J* = 19.6 Hz 1H), 4.28 (BA, *J* = 19.6 Hz, 1H), 3.22 (brs, 1H)

$^{13}\text{C}$  NMR (100 MHz,  $\text{CDCl}_3$ )  $\delta$  171.4 (d,  $J = 2.2$  Hz), 157.2 (d,  $J = 8.5$  Hz), 150.12 (d,  $J = 4.7$  Hz), 150.05 (d,  $J = 4.7$  Hz), 144.3, 132.7 (d,  $J = 9.8$  Hz), 130.00, 129.98, 129.96, 129.5, 129.2, 129.1, 128.7, 127.2, 126.1, 125.91, 125.87, 125.0, 120.8 (d,  $J = 4.5$  Hz), 66.3, 50.1 (d,  $J = 6.4$  Hz).

$^{31}\text{P}$  NMR (162 MHz,  $\text{CDCl}_3$ )  $\delta$  -11.9.

HRMS (ESI<sup>+</sup>)  $m/z$  calc'd for  $\text{C}_{27}\text{H}_{23}\text{NO}_5\text{PS}$   $[\text{M}+\text{H}]^+$ : 504.1029, found 504.1027.

HPLC conditions: hexane/2-propanol 85 : 15, 1.0 mL/min,  $\lambda = 280$  nm, Chiralpak IB column (4.6 mm x 250 mm),  $t_r$  (major) = 8.0 min,  $t_r$  (minor) = 11.9 min.

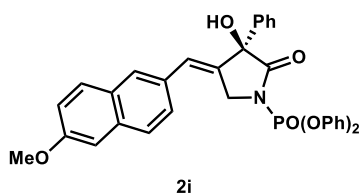

**Diphenyl (R,E)-(3-hydroxy-4-((6-methoxynaphthalen-2-yl)methylene)-2-oxo-3-phenylpyrrolidin-1-yl)phosphonate (2i)**

Following the general procedure, the reaction was performed with **1i** (57.4 mg, 0.1 mmol, 1.0 equiv),  $\text{Ni}(\text{OTf})_2 \cdot 6\text{H}_2\text{O}$  (5.1 mg, 0.010 mmol, 10 mol %), **L2** (3.1 mg, 0.010 mmol, 10 mol %),  $\text{NaH}_2\text{PO}_4$  (6.0 mg, 0.5 equiv) and  $(\text{EtO})_2\text{MeSiH}$  (32  $\mu\text{L}$ , 0.2 mmol, 2.0 equiv) in 1.0 mL of 2-MeTHF at 40  $^\circ\text{C}$  for 12 h. The desired product **2i** was obtained in 48% yield (27.8 mg) as a yellow liquid. er = 92 : 8.  $[\alpha]_{\text{D}}^{25} = +57.30$  (c 1.4,  $\text{CHCl}_3$ ).  $R_f = 0.5$  (PE : EtOAc = 2 : 1).

$^1\text{H}$  NMR (400 MHz,  $\text{CDCl}_3$ )  $\delta$  7.62 (d,  $J = 3.2$  Hz, 1H), 7.60 (d,  $J = 2.7$  Hz, 1H), 7.47 (d,  $J = 1.8$  Hz, 1H), 7.36 – 7.25 (m, 2H), 7.25 – 7.19 (m, 9H), 7.16 – 7.12 (m, 2H), 7.11 – 7.00 (m, 5H), 6.86 (d,  $J = 2.1$  Hz, 1H), 4.69 (dt,  $J = 14.5, 1.6$  Hz, 1H), 4.53 (dd,  $J = 14.4, 2.7$  Hz, 1H), 3.84 (s, 3H), 3.41 (brs, 1H).

$^{13}\text{C}$  NMR (100 MHz,  $\text{CDCl}_3$ )  $\delta$  176.4, 158.5, 149.9 (d,  $J = 7.0$  Hz), 149.7 (d,  $J = 6.6$  Hz), 140.2, 134.2, 133.6 (d,  $J = 8.6$  Hz), 130.2, 130.04, 129.98, 129.9, 129.0, 128.9, 128.8, 128.3, 127.3, 126.9, 126.03, 125.96, 125.7, 120.6 (d,  $J = 4.7$  Hz), 120.5 (d,  $J = 4.8$  Hz), 119.6, 105.8, 79.6 (d,  $J = 9.0$  Hz), 55.5, 49.8 (d,  $J = 5.4$  Hz).

$^{31}\text{P}$  NMR (162 MHz,  $\text{CDCl}_3$ )  $\delta$  -12.4.

HRMS (ESI<sup>+</sup>)  $m/z$  calc'd for  $\text{C}_{34}\text{H}_{29}\text{NO}_6\text{P}$   $[\text{M}+\text{H}]^+$ : 578.1727, found 578.1727.

HPLC conditions: hexane/2-propanol 85 : 15, 1.0 mL/min,  $\lambda = 254$  nm, Chiralpak IB column (4.6 mm x 250 mm),  $t_r$  (major) = 12.3 min,  $t_r$  (minor) = 14.2 min.

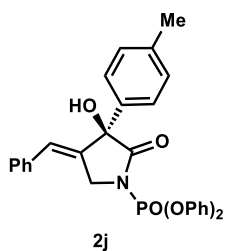

**Diphenyl (R,E)-(4-benzylidene-3-hydroxy-2-oxo-3-(p-tolyl)pyrrolidin-1-yl)phosphonate (2j)**

Following the general procedure, the reaction was performed with **1j** (101.5 mg, 0.2 mmol, 1.0 equiv), Ni(OTs)<sub>2</sub>•6H<sub>2</sub>O (10.1 mg, 0.020 mmol, 10 mol %), **L2** (6.1 mg, 0.020 mmol, 10 mol %), NaH<sub>2</sub>PO<sub>4</sub> (12.0 mg, 0.5 equiv) and (EtO)<sub>2</sub>MeSiH (64 μL, 0.4 mmol, 2.0 equiv) in 2.0 mL of 2-MeTHF at 40 °C for 12 h. The desired product **2j** was obtained in 74% yield (74.6 mg) as a white liquid. er = 94 : 6. [α]<sub>D</sub><sup>25</sup> = +66.73 (c 1.0, CHCl<sub>3</sub>). R<sub>f</sub> = 0.6 (PE : EtOAc = 2 : 1).

<sup>1</sup>H NMR (400 MHz, CDCl<sub>3</sub>) δ 7.32 – 7.23 (m, 2H), 7.23 – 7.16 (m, 6H), 7.16 – 7.06 (m, 7H), 7.04 – 6.94 (m, 4H), 6.79 – 6.72 (m, 1H), 4.58 (d, *J* = 14.4 Hz, 1H), 4.40 (dd, *J* = 14.4, 2.7 Hz, 1H), 3.31 (brs, 1H), 2.26 (s, 3H).

<sup>13</sup>C NMR (100 MHz, CDCl<sub>3</sub>) δ 176.4, 149.9 (d, *J* = 6.9 Hz), 149.7 (d, *J* = 6.7 Hz), 138.8, 137.0, 134.8, 134.6 (d, *J* = 8.1 Hz), 130.0, 129.9, 129.7, 128.9, 128.8, 128.3, 127.7, 126.0 (d, *J* = 1.5 Hz), 125.9 (d, *J* = 1.5 Hz), 125.7, 120.6 (d, *J* = 4.6 Hz), 120.5 (d, *J* = 4.7 Hz), 79.3 (d, *J* = 8.9 Hz), 49.5 (d, *J* = 5.3 Hz), 21.2.

<sup>31</sup>P NMR (162 MHz, CDCl<sub>3</sub>) δ –12.4.

**HRMS** (ESI<sup>+</sup>) *m/z* calc'd for C<sub>30</sub>H<sub>27</sub>NO<sub>5</sub>P [M+H]<sup>+</sup>: 512.1621, found 512.1623.

**HPLC conditions:** hexane/2-propanol 85 : 15, 1.0 mL/min, λ = 254 nm, Chiralpak IB column (4.6 mm x 250 mm), t<sub>r</sub> (major) = 7.4 min, t<sub>r</sub> (minor) = 9.2 min.

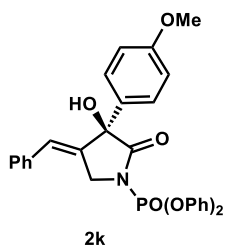

**Diphenyl (R,E)-(4-benzylidene-3-hydroxy-3-(4-methoxyphenyl)-2-oxopyrrolidin-1-yl)phosphonate (2k)**

Following the general procedure, the reaction was performed with **1k** (105.4 mg, 0.2 mmol, 1.0 equiv), Ni(OTs)<sub>2</sub>•6H<sub>2</sub>O (10.1 mg, 0.020 mmol, 10 mol %), **L2** (6.1 mg, 0.020 mmol, 10 mol %), NaH<sub>2</sub>PO<sub>4</sub> (12.0 mg, 0.5 equiv) and (EtO)<sub>2</sub>MeSiH (64 μL, 0.4 mmol, 2.0 equiv) in 2.0

mL of 2-MeTHF at 40 °C for 12 h. The desired product **2k** was obtained in 73% yield (76.8 mg) as a white liquid. er = 95.5 : 4.5.  $[\alpha]_{\text{D}}^{25} = +56.49$  (c 1.0, CHCl<sub>3</sub>).  $R_f = 0.7$  (PE : EtOAc = 2 : 1).

**<sup>1</sup>H NMR** (400 MHz, CDCl<sub>3</sub>)  $\delta$  7.36 – 7.17 (m, 9H), 7.14 – 7.04 (m, 6H), 7.03 – 6.93 (m, 2H), 6.78 (s, 1H), 6.76 – 6.69 (m, 2H), 4.56 (dt,  $J = 14.4, 1.5$  Hz, 1H), 4.38 (dd,  $J = 14.4, 2.7$  Hz, 1H), 3.72 (s, 3H).

**<sup>13</sup>C NMR** (100 MHz, CDCl<sub>3</sub>)  $\delta$  176.3, 160.1, 149.9 (d,  $J = 7.1$  Hz), 149.6 (d,  $J = 6.6$  Hz), 134.8, 134.5 (d,  $J = 8.4$  Hz), 131.8, 130.0, 129.9, 128.91, 128.89, 128.3, 127.7, 127.4, 126.0, 125.9, 120.6 (d,  $J = 4.6$  Hz), 120.5 (d,  $J = 4.7$  Hz), 114.3, 79.0 (d,  $J = 9.0$  Hz), 55.5, 49.5 (d,  $J = 5.4$  Hz).

**<sup>31</sup>P NMR** (162 MHz, CDCl<sub>3</sub>)  $\delta$  -12.4

**HRMS** (ESI<sup>+</sup>)  $m/z$  calc'd for C<sub>30</sub>H<sub>27</sub>NO<sub>6</sub>P [M+H]<sup>+</sup>: 528.1571, found 528.1566.

**HPLC conditions:** hexane/2-propanol 85 : 15, 1.0 mL/min,  $\lambda = 254$  nm, Chiralpak IB column (4.6 mm x 250 mm),  $t_r$  (major) = 10.6 min,  $t_r$  (minor) = 13.2 min.

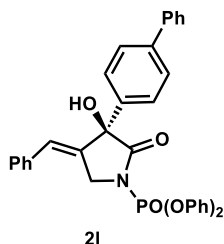

**Diphenyl (R,E)-(3-([1,1'-biphenyl]-4-yl)-4-benzylidene-3-hydroxy-2-oxopyrrolidin-1-yl)phosphonate (2l)**

Following the general procedure, the reaction was performed with **1l** (58.1 mg, 0.1 mmol, 1.0 equiv), Ni(OTf)<sub>2</sub>•6H<sub>2</sub>O (5.1 mg, 0.010 mmol, 10 mol %), **L2** (3.1 mg, 0.010 mmol, 10 mol %), NaH<sub>2</sub>PO<sub>4</sub> (6.0 mg, 0.5 equiv) and (EtO)<sub>2</sub>MeSiH (32  $\mu$ L, 0.2 mmol, 2.0 equiv) in 1.0 mL of 2-MeTHF at 40 °C for 12 h. The desired product **2l** was obtained in 61% yield (35.2 mg) as a colorless liquid. er = 94.5 : 5.5.  $[\alpha]_{\text{D}}^{25} = +41.85$  (c 1.9, CHCl<sub>3</sub>).  $R_f = 0.6$  (PE : EtOAc = 2 : 1).

**<sup>1</sup>H NMR** (400 MHz, CDCl<sub>3</sub>)  $\delta$  7.56 (d,  $J = 7.5$  Hz, 2H), 7.52 – 7.44 (m, 4H), 7.44 – 7.34 (m, 5H), 7.33 – 7.26 (m, 5H), 7.25 – 7.15 (m, 5H), 7.15 – 7. (m, 3H), 6.90 (s, 1H), 4.71 (d,  $J = 14.5$  Hz, 1H), 4.55 (dd,  $J = 14.5, 2.7$  Hz, 1H).

**<sup>13</sup>C NMR** (100 MHz, CDCl<sub>3</sub>)  $\delta$  176.3, 149.9 (d,  $J = 7.0$  Hz), 149.6 (d,  $J = 6.4$  Hz), 141.8, 140.4, 138.9, 134.8, 134.4 (d,  $J = 8.5$  Hz), 130.1, 129.9, 129.0, 128.94, 128.89, 128.4, 128.1, 127.8,

127.7, 127.2, 126.2, 126.0, 125.9, 120.7 (d,  $J = 4.6$  Hz), 120.5 (d,  $J = 4.8$  Hz), 79.3 (d,  $J = 8.8$  Hz), 49.7 (d,  $J = 5.4$  Hz).

$^{31}\text{P}$  NMR (162 MHz,  $\text{CDCl}_3$ )  $\delta -12.5$ .

HRMS (ESI<sup>+</sup>)  $m/z$  calc'd for  $\text{C}_{35}\text{H}_{29}\text{NO}_5\text{P}$   $[\text{M}+\text{H}]^+$ : 574.1778, found 574.1772.

HPLC conditions: hexane/2-propanol 85 : 15, 1.0 mL/min,  $\lambda = 254$  nm, Chiralcel OD-H column (4.6 mm x 250 mm),  $t_r$  (major) = 11.8 min,  $t_r$  (minor) = 21.4 min.

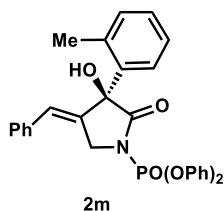

**Diphenyl (R,E)-(4-benzylidene-3-hydroxy-2-oxo-3-(*o*-tolyl)pyrrolidin-1-yl)phosphonate (2m)**

Following the general procedure, the reaction was performed with **1m** (49.8 mg, 0.1 mmol, 1.0 equiv),  $\text{Ni}(\text{OTf})_2 \cdot 6\text{H}_2\text{O}$  (5.1 mg, 0.010 mmol, 10 mol %), **L2** (3.1 mg, 0.010 mmol, 10 mol %),  $\text{NaH}_2\text{PO}_4$  (6.1 mg, 0.5 equiv) and  $(\text{EtO})_2\text{MeSiH}$  (32  $\mu\text{L}$ , 0.2 mmol, 2.0 equiv) in 1.0 mL of 2-MeTHF at 40 °C for 12 h. The desired product **2m** was obtained in 84% yield (42.8 mg) as a colorless liquid. er = 89.5 : 10.5.  $[\alpha]_{\text{D}}^{25} = +46.35$  (c 0.7,  $\text{CHCl}_3$ ).  $R_f = 0.7$  (PE : EtOAc = 2 : 1).

$^1\text{H}$  NMR (400 MHz,  $\text{CDCl}_3$ )  $\delta$  7.61 (dd,  $J = 7.0, 2.3$  Hz, 1H), 7.29 – 7.21 (m, 10H), 7.20 – 7.09 (m, 5H), 7.06 – 6.99 (m, 3H), 6.20 (dd,  $J = 2.6, 2.3$  Hz, 1H), 4.78 (dd,  $J = 14.7, 2.6$  Hz, 1H), 4.67 (dd,  $J = 14.8, 2.3$  Hz, 1H) 3.12 (brs, 1H), 1.85 (s, 3H).

$^{13}\text{C}$  NMR (100 MHz,  $\text{CDCl}_3$ )  $\delta$  175.9, 150.0 (d,  $J = 6.6$  Hz), 149.8 (d,  $J = 7.0$  Hz), 136.9, 135.5, 134.8, 134.4 (d,  $J = 9.4$  Hz), 131.9, 130.1, 130.0, 129.6, 129.0, 128.8, 128.5, 126.5, 126.1, 126.0, 125.9, 120.8 (d,  $J = 4.6$  Hz), 120.4 (d,  $J = 5.0$  Hz), 80.7 (d,  $J = 8.5$  Hz), 50.6 (d,  $J = 5.8$  Hz), 20.3.

$^{31}\text{P}$  NMR (162 MHz,  $\text{CDCl}_3$ )  $\delta -12.2$ .

HRMS (ESI<sup>+</sup>)  $m/z$  calc'd for  $\text{C}_{30}\text{H}_{27}\text{NO}_5\text{P}$   $[\text{M}+\text{H}]^+$ : 512.1621, found 512.1620.

HPLC conditions: hexane/2-propanol 85 : 15, 1.0 mL/min,  $\lambda = 254$  nm, Chiralcel OD-H column (4.6 mm x 250 mm),  $t_r$  (major) = 6.9 min,  $t_r$  (minor) = 8.5 min.

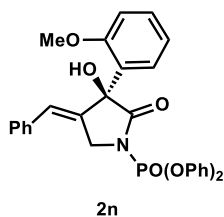

**Diphenyl (S,E)-(4-benzylidene-3-hydroxy-3-(2-methoxyphenyl)-2-oxopyrrolidin-1-yl)phosphonate (2n)**

Following the general procedure, the reaction was performed with **1n** (53.2 mg, 0.1 mmol, 1.0 equiv), Ni(OTs)<sub>2</sub>•6H<sub>2</sub>O (5.1 mg, 0.010 mmol, 10 mol %), **L2** (3.1 mg, 0.010 mmol, 10 mol %), NaH<sub>2</sub>PO<sub>4</sub> (6.3 mg, 0.5 equiv) and (EtO)<sub>2</sub>MeSiH (32 μL, 0.2 mmol, 2.0 equiv) in 1.0 mL of 2-MeTHF at 40 °C for 12 h. The desired product **2n** was obtained in 70% yield (36.4 mg) as a yellow liquid. er = 97 : 3. [α]<sub>D</sub><sup>25</sup> = +37.33 (c 0.7, CHCl<sub>3</sub>). R<sub>f</sub> = 0.6 (PE : EtOAc = 2 : 1).

<sup>1</sup>H NMR (400 MHz, CDCl<sub>3</sub>) δ 7.71 (dd, *J* = 7.7, 1.7 Hz, 1H), 7.38 – 7.27 (m, 11H), 7.26 – 7.23 (m, 2H), 7.22 – 7.17 (m, 1H), 7.17 – 7.12 (m, 2H), 7.07 – 7.02 (m, 1H), 6.82 (dd, *J* = 8.1, 1.0 Hz, 1H), 6.35 (q, *J* = 2.3 Hz, 1H), 4.83 (d, *J* = 2.6 Hz, 2H), 3.50 (s, 3H), 3.27 (brs, 1H).

<sup>13</sup>C NMR (100 MHz, CDCl<sub>3</sub>) δ 176.9 (d, *J* = 1.5 Hz), 155.8, 150.3 (d, *J* = 7.0 Hz), 150.0 (d, *J* = 6.9 Hz), 135.8 (d, *J* = 9.8 Hz), 135.3, 130.03, 129.96, 129.9, 129.6, 128.9, 128.8, 128.5, 128.1, 126.3, 126.0 (d, *J* = 1.5 Hz), 125.8 (d, *J* = 1.4 Hz), 121.0, 120.8 (d, *J* = 4.4 Hz), 120.7 (d, *J* = 4.4 Hz), 111.3, 78.7 (d, *J* = 9.1 Hz), 55.6, 50.9 (d, *J* = 6.0 Hz).

<sup>31</sup>P NMR (162 MHz, CDCl<sub>3</sub>) δ –11.9.

HRMS (ESI<sup>+</sup>) *m/z* calc'd for C<sub>30</sub>H<sub>27</sub>NO<sub>6</sub>P [M+H]<sup>+</sup>: 528.1571, found 528.1560.

**HPLC conditions:** hexane/2-propanol 85 : 15, 1.0 mL/min, λ = 280 nm, Chiralpak IB column (4.6 mm x 250 mm), t<sub>r</sub> (major) = 10.3 min, t<sub>r</sub> (minor) = 8.8 min.

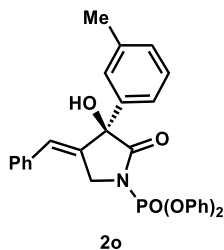

**Diphenyl (R,E)-(4-benzylidene-3-hydroxy-2-oxo-3-(*m*-tolyl)pyrrolidin-1-yl)phosphonate (2o)**

Following the general procedure, the reaction was performed with **1o** (50.4 mg, 0.1 mmol, 1.0 equiv), Ni(OTs)<sub>2</sub>•6H<sub>2</sub>O (5.1 mg, 0.010 mmol, 10 mol %), **L2** (3.1 mg, 0.010 mmol, 10 mol %),

NaH<sub>2</sub>PO<sub>4</sub> (6.3 mg, 0.5 equiv) and (EtO)<sub>2</sub>MeSiH (32 μL, 0.2 mmol, 2.0 equiv) in 1.0 mL of 2-MeTHF at 40 °C for 12 h. The desired product **2o** was obtained in 71% yield (35.7 mg) as a yellow liquid. er = 94 : 6. [α]<sub>D</sub><sup>25</sup> = +32.94 (c 0.5, CHCl<sub>3</sub>). R<sub>f</sub> = 0.6 (PE : EtOAc = 2 : 1).

<sup>1</sup>H NMR (400 MHz, CDCl<sub>3</sub>) δ 7.32 – 7.14 (m, 8H), 7.13 – 6.96 (m, 11H), 6.75 (s, 1H), 4.58 (d, *J* = 14.4 Hz, 1H), 4.43 (dd, *J* = 14.5, 2.7 Hz, 1H), 3.44 (brs, 1H), 2.20 (s, 3H).

<sup>13</sup>C NMR (100 MHz, CDCl<sub>3</sub>) δ 176.3 (d, *J* = 1.5 Hz), 149.9 (d, *J* = 7.0 Hz), 149.6 (d, *J* = 6.7 Hz), 139.9, 138.8, 134.8, 134.6 (d, *J* = 8.5 Hz), 130.0, 129.9, 129.7, 128.91, 128.86, 128.8, 128.3, 127.9, 126.3, 126.0 (d, *J* = 1.6 Hz), 125.9, 122.8, 120.5 (d, *J* = 4.8 Hz), 120.5 (d, *J* = 4.8 Hz), 79.4 (d, *J* = 8.9 Hz), 49.6 (d, *J* = 5.4 Hz), 21.7.

<sup>31</sup>P NMR (162 MHz, CDCl<sub>3</sub>) δ –12.4.

HRMS (ESI<sup>+</sup>) *m/z* calc'd for C<sub>30</sub>H<sub>27</sub>NO<sub>5</sub>P [M+H]<sup>+</sup>: 512.1621, found 512.1623.

**HPLC conditions:** hexane/2-propanol 85 : 15, 1.0 mL/min, λ = 254 nm, Chiralpak IB column (4.6 mm x 250 mm), t<sub>r</sub> (major) = 6.6 min, t<sub>r</sub> (minor) = 8.5 min.

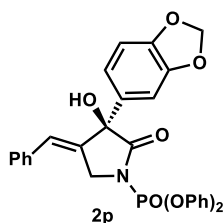

**Diphenyl (R,E)-(3-(benzo[*d*][1,3]dioxol-5-yl)-4-benzylidene-3-hydroxy-2-oxopyrrolidin-1-yl)phosphonate (2p)**

Following the general procedure, the reaction was performed with **1p** (53.8 mg, 0.1 mmol, 1.0 equiv), Ni(OTf)<sub>2</sub>•6H<sub>2</sub>O (5.1 mg, 0.010 mmol, 10 mol %), **L2** (3.1 mg, 0.010 mmol, 10 mol %), NaH<sub>2</sub>PO<sub>4</sub> (6.0 mg, 0.5 equiv) and (EtO)<sub>2</sub>MeSiH (32 μL, 0.2 mmol, 2.0 equiv) in 1.0 mL of 2-MeTHF at 40 °C for 12 h. The desired product **2p** was obtained in 66% yield (35.4 mg) as a colorless liquid. er = 93.5 : 6.5. [α]<sub>D</sub><sup>25</sup> = +36.88 (c 0.5, CHCl<sub>3</sub>). R<sub>f</sub> = 0.6 (PE : EtOAc = 2 : 1).

<sup>1</sup>H NMR (400 MHz, CDCl<sub>3</sub>) δ 7.30 – 7.24 (m, 2H), 7.23 – 7.15 (m, 6H), 7.16 – 7.01 (m, 7H), 6.86 (d, *J* = 1.9 Hz, 1H), 6.75 (d, *J* = 2.2 Hz, 1H), 6.66 (dd, *J* = 8.2, 1.9 Hz, 1H), 6.56 (d, *J* = 8.1 Hz, 1H), 5.87 (s, 2H), 4.56 (d, *J* = 14.4 Hz, 1H), 4.39 (dd, *J* = 14.5, 2.7 Hz, 1H), 3.38 (brs, 1H).

<sup>13</sup>C NMR (100 MHz, CDCl<sub>3</sub>) δ 176.1 (d, *J* = 1.5 Hz), 149.9 (d, *J* = 7.2 Hz), 149.6 (d, *J* = 6.8 Hz), 148.3, 148.2, 134.7, 134.4 (d, *J* = 8.4 Hz), 133.7, 130.0 (d, *J* = 1.1 Hz), 129.9 (d, *J* = 1.1

Hz), 128.91, 128.87, 128.4, 128.0, 126.0 (d,  $J = 1.5$  Hz), 125.9 (d,  $J = 1.6$  Hz), 120.6 (d,  $J = 4.6$  Hz), 120.4 (d,  $J = 5.0$  Hz), 119.6, 108.3, 106.7, 101.5, 79.1 (d,  $J = 8.8$  Hz), 49.5 (d,  $J = 5.3$  Hz).

$^{31}\text{P}$  NMR (162 MHz,  $\text{CDCl}_3$ )  $\delta -12.5$ .

HRMS (ESI<sup>+</sup>)  $m/z$  calc'd for  $\text{C}_{30}\text{H}_{24}\text{NO}_7\text{PNa}$   $[\text{M}+\text{Na}]^+$ : 564.1183, found 564.1181.

HPLC conditions: hexane/2-propanol 85 : 15, 1.0 mL/min,  $\lambda = 254$  nm, Chiralpak IB column (4.6 mm x 250 mm),  $t_r$  (major) = 10.4 min,  $t_r$  (minor) = 13.2 min.

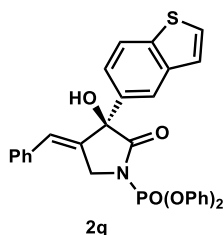

**Diphenyl (R,E)-(3-(benzo[*b*]thiophen-5-yl)-4-benzylidene-3-hydroxy-2-oxopyrrolidin-1-yl)phosphonate (2q)**

Following the general procedure, the reaction was performed with **1q** (55.9 mg, 0.1 mmol, 1.0 equiv),  $\text{Ni}(\text{OTs})_2 \cdot 6\text{H}_2\text{O}$  (5.1 mg, 0.010 mmol, 10 mol %), **L2** (3.1 mg, 0.010 mmol, 10 mol %),  $\text{NaH}_2\text{PO}_4$  (6.0 mg, 0.5 equiv) and  $(\text{EtO})_2\text{MeSiH}$  (32  $\mu\text{L}$ , 0.2 mmol, 2.0 equiv) in 1.0 mL of 2-MeTHF at 40 °C for 12 h. The desired product **2q** was obtained in 68% yield (37.9 mg) as a colorless liquid.  $er = 95.5 : 4.5$ .  $[\alpha]_{\text{D}}^{25} = +30.79$  (c 1.1,  $\text{CHCl}_3$ ).  $R_f = 0.5$  (PE : EtOAc = 2 : 1).

$^1\text{H}$  NMR (400 MHz,  $\text{CDCl}_3$ )  $\delta$  7.69 (s, 1H), 7.66 (d,  $J = 8.6$  Hz, 1H), 7.37 (d,  $J = 5.5$  Hz, 1H), 7.31 – 7.22 (m, 3H), 7.22 – 7.15 (m, 5H), 7.14 – 7.08 (m, 3H), 7.08 – 7.03 (m, 1H), 6.97 – 6.87 (m, 5H), 6.79 (s, 1H), 4.61 (d,  $J = 14.5$  Hz, 1H), 4.46 (dd,  $J = 14.5, 2.6$  Hz, 1H).

$^{13}\text{C}$  NMR (100 MHz,  $\text{CDCl}_3$ )  $\delta$  176.4, 149.8 (d,  $J = 7.1$  Hz), 149.5 (d,  $J = 6.5$  Hz), 140.2, 139.8, 136.3, 134.8, 134.6 (d,  $J = 8.5$  Hz), 130.0, 129.8, 128.92, 128.86, 128.3, 128.2, 127.5, 120.6 (d,  $J = 4.5$  Hz), 124.3, 123.1, 122.0, 121.0, 120.6 (d,  $J = 4.5$  Hz), 120.3 (d,  $J = 4.8$  Hz), 79.54 (d,  $J = 8.8$  Hz), 49.69 (d,  $J = 5.1$  Hz).

$^{31}\text{P}$  NMR (162 MHz,  $\text{CDCl}_3$ )  $\delta -12.5$ .

HRMS (ESI<sup>+</sup>)  $m/z$  calc'd for  $\text{C}_{31}\text{H}_{25}\text{NO}_5\text{PS}$   $[\text{M}+\text{H}]^+$ : 554.1186, found 554.1187.

HPLC conditions: hexane/2-propanol 85 : 15, 1.0 mL/min,  $\lambda = 254$  nm, Chiralpak IB column (4.6 mm x 250 mm),  $t_r$  (major) = 9.6 min,  $t_r$  (minor) = 12.0 min.



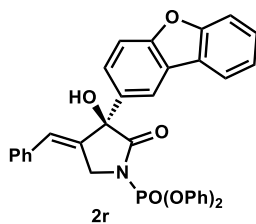

**Diphenyl (*R,E*)-(4-benzylidene-3-(dibenzo[*b,d*]furan-2-yl)-3-hydroxy-2-oxopyrrolidin-1-yl)phosphonate (**2r**)**

Following the general procedure, the reaction was performed with **1r** (57.4 mg, 0.1 mmol, 1.0 equiv), Ni(OTs)<sub>2</sub>•6H<sub>2</sub>O (5.1 mg, 0.010 mmol, 10 mol %), **L2** (3.1 mg, 0.010 mmol, 10 mol %), NaH<sub>2</sub>PO<sub>4</sub> (6.0 mg, 0.5 equiv) and (EtO)<sub>2</sub>MeSiH (32 μL, 0.2 mmol, 2.0 equiv) in 1.0 mL of 2-MeTHF at 40 °C for 12 h. The desired product **2r** was obtained in 52% yield (29.8 mg) as a yellow liquid. er = 95 : 5. [α]<sub>D</sub><sup>25</sup> = +48.03 (c 1.6, CHCl<sub>3</sub>). R<sub>f</sub> = 0.5 (PE : EtOAc = 2 : 1).

**<sup>1</sup>H NMR** (400 MHz, CDCl<sub>3</sub>) 7.99 (d, *J* = 1.8 Hz, 1H), 7.83 – 7.76 (m, 1H), 7.55 – 7.48 (m, 1H), 7.45 – 7.36 (m, 2H), 7.34 – 7.29 (m, 3H), 7.28 – 7.22 (m, 5H), 7.20 – 7.15 (m, 4H), 7.15 – 7.09 (m, 1H), 7.03 – 6.93 (m, 4H), 6.93 – 6.84 (m, 2H), 4.67 (dt, *J* = 14.7, 1.5 Hz, 1H), 4.52 (dd, *J* = 14.5, 2.7 Hz, 1H).

**<sup>13</sup>C NMR** (100 MHz, CDCl<sub>3</sub>) δ 176.3, 156.8, 156.3, 149.9 (d, *J* = 7.0 Hz), 149.6 (d, *J* = 6.5 Hz), 134.8, 134.60 (d, *J* = 8.7 Hz), 134.58, 130.1, 129.8, 129.0, 128.9, 128.5, 127.8, 126.1, 125.8, 125.1, 124.9, 123.9, 123.1, 121.1, 120.6 (d, *J* = 4.7 Hz), 120.3 (d, *J* = 4.8 Hz), 118.5, 112.0, 111.9, 79.5 (d, *J* = 9.0 Hz), 49.7 (d, *J* = 5.1 Hz).

**<sup>31</sup>P NMR** (162 MHz, CDCl<sub>3</sub>) δ –12.6.

**HRMS** (ESI<sup>+</sup>) *m/z* calc'd for C<sub>35</sub>H<sub>27</sub>NO<sub>6</sub>P [M+H]<sup>+</sup>: 588.1571, found 588.1566.

**HPLC conditions:** hexane/2-propanol 85 : 15, 1.0 mL/min, λ = 254 nm, Chiralcel OD-H column (4.6 mm x 250 mm), t<sub>r</sub> (major) = 9.1 min, t<sub>r</sub> (minor) = 14.7 min.

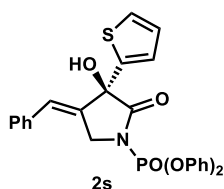

**Diphenyl (*R,E*)-(4-benzylidene-3-hydroxy-2-oxo-3-(thiophen-2-yl)pyrrolidin-1-yl)phosphonate (**2s**)**

Following the general procedure, the reaction was performed with **1s** (55.1 mg, 0.1 mmol, 1.0 equiv), Ni(OTs)<sub>2</sub>•6H<sub>2</sub>O (5.1 mg, 0.010 mmol, 10 mol %), **L2** (3.2 mg, 0.010 mmol, 10 mol %), NaH<sub>2</sub>PO<sub>4</sub> (6.0 mg, 0.5 equiv) and (EtO)<sub>2</sub>MeSiH (32 μL, 0.2 mmol, 2.0 equiv) in 1.0 mL of 2-

MeTHF at 40 °C for 12 h. The desired product **2s** was obtained in 69% yield (37.7 mg) as a white solid. er = 87.5 : 12.5.  $[\alpha]_{\text{D}}^{25} = +38.71$  (c 0.8, CHCl<sub>3</sub>).  $R_f = 0.5$  (PE : EtOAc = 2 : 1).

**<sup>1</sup>H NMR** (400 MHz, CDCl<sub>3</sub>)  $\delta$  7.41 – 7.25 (m, 8H), 7.24 – 7.09 (m, 6H), 7.10 – 7.05 (m, 2H), 6.99 (s, 1H), 6.96 – 6.88 (m, 2H), 4.74 – 4.60 (m, 1H), 4.52 (dd,  $J = 14.5, 2.7$  Hz, 1H), 3.71 (brs, 1H).

**<sup>13</sup>C NMR** (100 MHz, CDCl<sub>3</sub>)  $\delta$  175.0, 149.8 (d,  $J = 7.0$  Hz), 149.5 (d,  $J = 6.7$  Hz), 143.5, 134.6, 133.8 (d,  $J = 8.7$  Hz), 130.0, 129.9, 129.0, 128.9, 128.5, 127.9, 127.5, 127.4, 126.3, 126.0, 125.9, 120.6 (d,  $J = 4.6$  Hz), 120.4 (d,  $J = 4.7$  Hz), 76.7 (d,  $J = 9.3$  Hz), 49.3 (d,  $J = 5.2$  Hz).

**<sup>31</sup>P NMR** (162 MHz, CDCl<sub>3</sub>)  $\delta$  –12.6.

**HRMS** (ESI<sup>+</sup>)  $m/z$  calc'd for C<sub>27</sub>H<sub>23</sub>NO<sub>5</sub>PS [M+H]<sup>+</sup>: 504.1035, found 504.1035.

**HPLC conditions:** hexane/2-propanol 80 : 20, 1.0 mL/min,  $\lambda = 254$  nm, Chiralpak IB column (4.6 mm x 250 mm),  $t_r$  (major) = 7.5 min,  $t_r$  (minor) = 8.4 min.

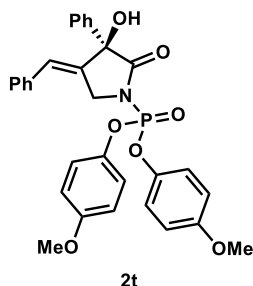

**Bis(4-methoxyphenyl) (R,E)-(4-benzylidene-3-hydroxy-2-oxo-3-phenylpyrrolidin-1-yl)phosphonate (2t)**

Following the general procedure, the reaction was performed with **1t** (110.7 mg, 0.2 mmol, 1.0 equiv), Ni(OTf)<sub>2</sub>•6H<sub>2</sub>O (10.2 mg, 0.020 mmol, 10 mol %), **L2** (6.1 mg, 0.020 mmol, 10 mol %), NaH<sub>2</sub>PO<sub>4</sub> (12.0 mg, 0.5 equiv) and (EtO)<sub>2</sub>MeSiH (64  $\mu$ L, 0.4 mmol, 2.0 equiv) in 2.0 mL of 2-MeTHF at 40 °C for 12 h. The desired product **2t** was obtained in 80% yield (88.1 mg) as a colorless liquid. er = 94 : 6.  $[\alpha]_{\text{D}}^{25} = +56.61$  (c 2.9, CHCl<sub>3</sub>).  $R_f = 0.6$  (PE : EtOAc = 2 : 1).

**<sup>1</sup>H NMR** (400 MHz, CDCl<sub>3</sub>)  $\delta$  7.40 – 7.27 (m, 8H), 7.22 – 7.14 (m, 4H), 7.03 – 6.95 (m, 2H), 6.82 (s, 1H), 6.81 – 6.74 (m, 2H), 6.71 – 6.63 (m, 2H), 4.67 (d,  $J = 14.5$  Hz, 1H), 4.46 (dd,  $J = 14.5, 2.7$  Hz, 1H), 3.75 (s, 3H), 3.73 (s, 3H), 3.69 (brs, 1H).

**<sup>13</sup>C NMR** (100 MHz, CDCl<sub>3</sub>)  $\delta$  176.3, 157.4, 157.3, 143.3 (d,  $J = 7.1$  Hz), 143.1 (d,  $J = 6.8$  Hz), 140.1, 134.8, 134.6 (d,  $J = 8.3$  Hz), 128.91, 128.90, 128.8, 128.3, 128.0, 125.8, 121.6, 121.5 (d,  $J = 4.4$  Hz), 121.4 (d,  $J = 4.5$  Hz), 114.9, 114.8, 79.4 (d,  $J = 8.8$  Hz), 55.7, 49.7 (d,  $J = 5.1$  Hz).

<sup>31</sup>P NMR (162 MHz, CDCl<sub>3</sub>) δ -11.4.

HRMS (ESI<sup>+</sup>) *m/z* calc'd for C<sub>31</sub>H<sub>29</sub>NO<sub>7</sub>P [M+H]<sup>+</sup>: 558.1676, found 558.1677.

HPLC conditions: hexane/2-propanol 90 : 10, 1.0 mL/min, λ = 254 nm, Chiralpak IB column (4.6 mm x 250 mm), *t<sub>r</sub>* (major) = 13.8 min, *t<sub>r</sub>* (minor) = 15.4 min.

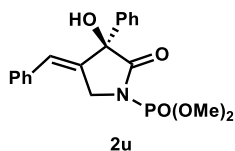

**Dimethyl (R,E)-(4-benzylidene-3-hydroxy-2-oxo-3-phenylpyrrolidin-1-yl)phosphonate (2u)**

Following the general procedure, the reaction was performed with **1u** (74.3 mg, 0.2 mmol, 1.0 equiv), Ni(OTf)<sub>2</sub>·6H<sub>2</sub>O (10.2 mg, 0.020 mmol, 10 mol %), **L2** (6.1 mg, 0.020 mmol, 10 mol %), NaH<sub>2</sub>PO<sub>4</sub> (12.0 mg, 0.5 equiv) and (EtO)<sub>2</sub>MeSiH (64 μL, 0.4 mmol, 2.0 equiv) in 2.0 mL of 2-MeTHF at 40 °C for 12 h. The desired product **2u** was obtained in 50% yield (37.2 mg) as a yellow liquid. er = 94.5 : 5.5. [α]<sub>D</sub><sup>25</sup> = +44.30 (c 0.6, CHCl<sub>3</sub>). R<sub>f</sub> = 0.6 (DCM : EtOAc = 2 : 1).

<sup>1</sup>H NMR (400 MHz, CDCl<sub>3</sub>) δ 7.53 – 7.41 (m, 2H), 7.33 – 7.21 (m, 5H), 7.19 – 7.13 (m, 3H), 6.83 (d, *J* = 2.0 Hz, 1H), 4.59 (dt, *J* = 14.5, 1.4 Hz, 1H), 4.47 (dd, *J* = 14.5, 2.7 Hz, 1H), 3.88 (brs, 1H), 3.74 (d, *J* = 11.7 Hz, 3H), 3.67 (d, *J* = 11.7 Hz, 3H).

<sup>13</sup>C NMR (100 MHz, CDCl<sub>3</sub>) δ 176.8, 140.3, 135.1, 135.0, 129.0, 128.93, 128.92, 128.85, 128.2, 127.6, 125.7, 79.4 (d, *J* = 8.7 Hz), 54.9 (d, *J* = 6.0 Hz), 54.7 (d, *J* = 6.1 Hz), 49.1 (d, *J* = 5.1 Hz).

<sup>31</sup>P NMR (162 MHz, CDCl<sub>3</sub>) δ -0.7.

HRMS (ESI<sup>+</sup>) *m/z* calc'd for C<sub>19</sub>H<sub>21</sub>NO<sub>5</sub>P [M+H]<sup>+</sup>: 374.1152, found 374.1153.

HPLC conditions: hexane/2-propanol 80 : 20, 1.0 mL/min, λ = 254 nm, Chiralpak IB column (4.6 mm x 250 mm), *t<sub>r</sub>* (major) = 10.0 min, *t<sub>r</sub>* (minor) = 15.1 min.

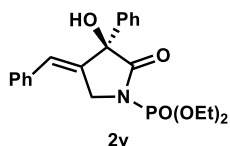

**Diethyl (R,E)-(4-benzylidene-3-hydroxy-2-oxo-3-phenylpyrrolidin-1-yl)phosphonate (2v)**

Following the general procedure, the reaction was performed with **1v** (78.9 mg, 0.2 mmol, 1.0 equiv), Ni(OTf)<sub>2</sub>·6H<sub>2</sub>O (10.2 mg, 0.020 mmol, 10 mol %), **L2** (6.1 mg, 0.020 mmol, 10 mol %), NaH<sub>2</sub>PO<sub>4</sub> (12.0 mg, 0.5 equiv) and (EtO)<sub>2</sub>MeSiH (64 μL, 0.4 mmol, 2.0 equiv) in 2.0 mL of 2-

MeTHF at 40 °C for 12 h. The desired product **2v** was obtained in 65% yield (51.0 mg) as a yellow liquid. er = 95 : 5.  $[\alpha]_D^{25} = +29.87$  (c 1.0, CHCl<sub>3</sub>).  $R_f = 0.5$  (DCM : EtOAc = 2 : 1).

**<sup>1</sup>H NMR** (400 MHz, CDCl<sub>3</sub>)  $\delta$  7.51 – 7.44 (m, 2H), 7.33 – 7.23 (m, 5H), 7.26 – 7.13 (m, 3H), 6.83 (s, 1H), 4.59 (d,  $J = 14.6$  Hz, 1H), 4.47 (dd,  $J = 14.6, 2.7$  Hz, 1H), 4.19 – 4.02 (m, 3H), 4.00 – 3.89 (m, 1H), 3.85 (brs, 1H), 1.23 (t,  $J = 7.1$  Hz, 3H), 1.15 (t,  $J = 7.1$  Hz, 3H).

**<sup>13</sup>C NMR** (100 MHz, CDCl<sub>3</sub>)  $\delta$  176.6, 140.4, 135.2 (d,  $J = 8.0$  Hz), 135.0, 128.91, 128.89, 128.84, 128.82, 128.2, 127.4, 125.7, 79.4 (d,  $J = 8.6$  Hz), 64.7 (d,  $J = 5.9$  Hz), 64.6 (d,  $J = 5.9$  Hz), 49.0 (d,  $J = 5.2$  Hz), 16.1 (d,  $J = 7.5$  Hz), 16.0 (d,  $J = 7.5$  Hz).

**<sup>31</sup>P NMR** (162 MHz, CDCl<sub>3</sub>)  $\delta$  –3.7.

**HRMS** (ESI<sup>+</sup>)  $m/z$  calc'd for C<sub>21</sub>H<sub>25</sub>NO<sub>5</sub>P [M+H]<sup>+</sup>: 402.1465, found 402.1462.

**HPLC conditions:** hexane/2-propanol 80 : 20, 1.0 mL/min,  $\lambda = 254$  nm, Chiralpak IB column (4.6 mm x 250 mm),  $t_r$  (major) = 6.3 min,  $t_r$  (minor) = 10.0 min.

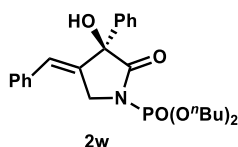

**Dibutyl (*R,E*)-(4-benzylidene-3-hydroxy-2-oxo-3-phenylpyrrolidin-1-yl)phosphonate (**2w**)**

Following the general procedure, the reaction was performed with **1w** (91.0 mg, 0.2 mmol, 1.0 equiv), Ni(OTf)<sub>2</sub>•6H<sub>2</sub>O (10.2 mg, 0.020 mmol, 10 mol %), **L2** (6.1 mg, 0.020 mmol, 10 mol %), NaH<sub>2</sub>PO<sub>4</sub> (12.0 mg, 0.5 equiv) and (EtO)<sub>2</sub>MeSiH (64  $\mu$ L, 0.4 mmol, 2.0 equiv) in 2.0 mL of 2-MeTHF at 40 °C for 12 h. The desired product **2w** was obtained in 55% yield (50.1 mg) as a yellow liquid. er = 95 : 5.  $[\alpha]_D^{25} = +29.27$  (c 1.0, CHCl<sub>3</sub>).  $R_f = 0.4$  (DCM : EtOAc = 2 : 1).

**<sup>1</sup>H NMR** (400 MHz, CDCl<sub>3</sub>)  $\delta$  7.64 – 7.53 (m, 2H), 7.44 – 7.37 (m, 5H), 7.35 – 7.24 (m, 3H), 6.93 (q,  $J = 2.0$  Hz, 1H), 4.69 (dt,  $J = 14.6, 1.4$  Hz, 1H), 4.56 (dd,  $J = 14.6, 2.7$  Hz, 1H), 4.22 – 4.03 (m, 3H), 3.96 (dq,  $J = 9.9, 6.7$  Hz, 1H), 3.88 (brs, 1H), 1.72 – 1.62 (m, 2H), 1.62 – 1.53 (m, 2H), 1.46 – 1.35 (m, 2H), 1.35 – 1.24 (m, 2H), 0.89 (dt,  $J = 14.6, 7.4$  Hz, 6H).

**<sup>13</sup>C NMR** (100 MHz, CDCl<sub>3</sub>)  $\delta$  176.5, 140.4, 135.2 (d,  $J = 8.0$  Hz), 135.0, 128.90, 128.88, 128.83, 128.80, 128.1, 127.4, 125.8, 79.4 (d,  $J = 8.4$  Hz), 68.4 (d,  $J = 6.3$  Hz), 68.3 (d,  $J = 6.3$  Hz), 49.1 (d,  $J = 5.1$  Hz), 32.2 (d,  $J = 7.2$  Hz), 32.1 (d,  $J = 7.2$  Hz), 18.7, 18.6, 13.61, 13.58.

**<sup>31</sup>P NMR** (162 MHz, CDCl<sub>3</sub>)  $\delta$  –3.5.

**HRMS** (ESI<sup>+</sup>)  $m/z$  calc'd for C<sub>25</sub>H<sub>33</sub>NO<sub>5</sub>P [M+H]<sup>+</sup>: 458.2091, found 458.2089.

**HPLC conditions:** hexane/2-propanol 80 : 20, 1.0 mL/min,  $\lambda = 260$  nm, Chiralpak IB column (4.6 mm x 250 mm),  $t_r$  (major) = 4.7 min,  $t_r$  (minor) = 7.9 min.

## V. Mechanistic Experiments

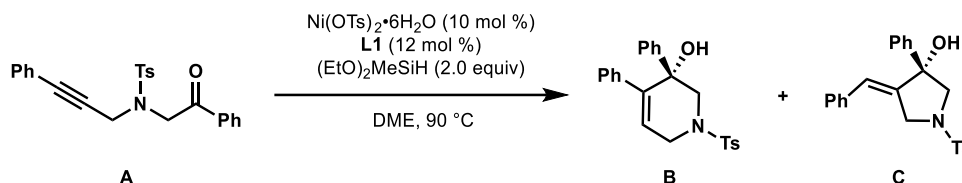

### (S)-3,4-Diphenyl-1-tosyl-1,2,3,6-tetrahydropyridin-3-ol (**B**)

$\text{Ni}(\text{OTs})_2 \cdot 6\text{H}_2\text{O}$  (10.1 mg, 0.020 mmol, 10 mol %), **L1** (10.2 mg, 0.024 mmol, 12 mol %) and 2.0 mL of DME were added to a Schlenk tube under Ar. The resultant solution was stirred at rt for 20 min, then **A** (81.1 mg, 0.2 mmol, 1.0 equiv),  $(\text{EtO})_2\text{MeSiH}$  (64  $\mu\text{L}$ , 0.4 mmol, 2.0 equiv) and another 2.0 mL of DME were added. The tube was sealed and the mixture was stirred at 90 °C for 24 h. After the reaction was cooled to rt, the mixture was filtered through a celite pad and the solid was washed with EtOAc (5 mL  $\times$  3). After the collected solvents were removed under reduced pressure, the regioselectivity was determined (**B** : **C** = 3.5 : 1) by  $^1\text{H}$  NMR of the crude mixture. The residue was purified by silica gel column chromatography to provide **B** (33.1 mg, 44%) as a colorless liquid.  $n_D^{20} = 1.54$  : 1.46.  $R_f = 0.2$  (PE : DCM = 1 : 4).

$^1\text{H}$  NMR (400 MHz,  $\text{CDCl}_3$ )  $\delta$  7.64 (d,  $J = 8.3$  Hz, 2H), 7.37 – 7.29 (m, 4H), 7.28 – 7.23 (m, 2H), 7.23 – 7.16 (m, 3H), 7.14 – 7.06 (m, 3H), 6.14 (dd,  $J = 4.6, 2.5$  Hz, 1H), 4.26 – 4.13 (m, 1H), 3.64 (AB,  $J = 11.8$  Hz, 1H), 3.52 (dd,  $J = 16.9, 2.6$  Hz, 1H), 2.86 (BA,  $J = 11.8$  Hz, 1H), 2.43 (s, 3H).

$^{13}\text{C}$  NMR (101 MHz,  $\text{CDCl}_3$ )  $\delta$  144.2, 142.3, 141.9, 138.3, 132.8, 130.0, 128.15, 128.13, 128.0, 127.5, 127.34, 127.31, 126.3, 124.2, 73.9, 58.6, 46.0, 21.7.

**HRMS** (ESI $^+$ )  $m/z$  calc'd for  $\text{C}_{24}\text{H}_{23}\text{NO}_3\text{SNa}$  [ $\text{M}+\text{Na}$ ] $^+$ : 428.1291, found 428.1286.

**HPLC conditions:** hexane/2-propanol 70 : 30, 1.0 mL/min,  $\lambda = 254$  nm, Chiralpak AD-H column (4.6 mm x 250 mm),  $t_r$  (major) = 13.4 min,  $t_r$  (minor) = 19.2 min.

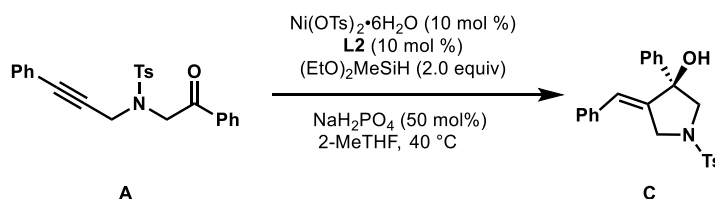

**(*R,E*)-4-Denzylidene-3-phenyl-1-tosylpyrrolidin-3-ol (C)**

To a Schlenk tube were added Ni(OTs)<sub>2</sub>•6H<sub>2</sub>O (5.1 mg, 0.01 mmol, 10 mol %), **L2** (3.1 mg, 0.01 mmol, 10 mol %), and 0.5 mL of 2-MeTHF under Ar. The resultant solution was stirred at room temperature for 20 min, then **A** (40.3 mg, 0.1 mmol, 1.0 equiv), NaH<sub>2</sub>PO<sub>4</sub> (6.0 mg, 0.5 equiv), (EtO)<sub>2</sub>MeSiH (32 μL, 0.2 mmol, 2.0 equiv) and another 0.5 mL of 2-MeTHF were added. The tube was sealed and the mixture was stirred at 40 °C for 12 h. After the reaction was cooled to room temperature, the mixture was filtered through a celite pad and the solid was washed with EtOAc (5 mL × 3). After the collected solvents were removed under reduced pressure, the residue was purified by silica gel column chromatography to provide **C** (13.2 mg, 33%) as a colorless liquid. er = 96 : 4. [α]<sub>D</sub><sup>25</sup> = +15.9 (c 1.6, CHCl<sub>3</sub>). R<sub>f</sub> = 0.2 (PE : EtOAc = 5 : 1).

<sup>1</sup>H NMR (400 MHz, CDCl<sub>3</sub>) δ 7.75 (d, *J* = 8.0 Hz, 2H), 7.50 – 7.43 (m, 2H), 7.40 – 7.24 (m, 8H), 7.15 (d, *J* = 7.6 Hz, 2H), 6.30 (d, *J* = 2.6 Hz, 1H), 4.52 (dd, *J* = 15.0, 2.5 Hz, 1H), 4.27 (dd, *J* = 15.0, 2.6 Hz, 1H), 3.58 (q, *J* = 10.4 Hz, 2H), 2.44 (s, 3H).

<sup>13</sup>C NMR (100 MHz, CDCl<sub>3</sub>) δ 144.1, 142.6, 141.5, 135.7, 133.0, 130.0, 128.8, 128.7, 128.5, 128.1, 128.04, 127.99, 126.7, 126.3, 82.1, 61.6, 50.8, 21.7

HRMS (ESI<sup>+</sup>) *m/z* calc'd for C<sub>24</sub>H<sub>24</sub>O<sub>3</sub>NS [M+H]<sup>+</sup>: 406.1477, found 406.1475.

**HPLC conditions:** hexane/2-propanol 85 : 15, 1.0 mL/min, λ = 254 nm, Chiralpak IB column (4.6 mm x 250 mm), t<sub>r</sub> (major) = 11.4 min, t<sub>r</sub> (minor) = 13.7 min.

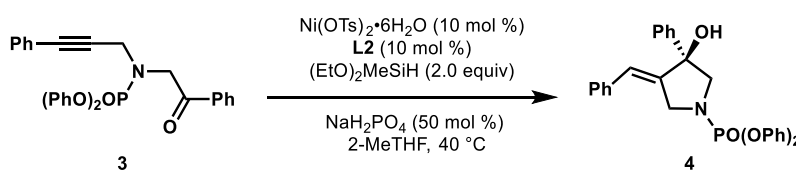**Diphenyl (*R,E*)-(4-benzylidene-3-hydroxy-3-phenylpyrrolidin-1-yl)phosphonate (4)**

To a Schlenk tube were added Ni(OTs)<sub>2</sub>•6H<sub>2</sub>O (5.1 mg, 0.01 mmol, 10 mol %), **L2** (3.1 mg, 0.01 mmol, 10 mol %), and 0.5 mL of 2-MeTHF under Ar. The resultant solution was stirred at room temperature for 20 min, then **3** (48.2 mg, 0.1 mmol, 1.0 equiv), NaH<sub>2</sub>PO<sub>4</sub> (6.0 mg, 0.5 equiv), (EtO)<sub>2</sub>MeSiH (32 μL, 0.2 mmol, 2.0 equiv) and another 0.5 mL of 2-MeTHF were added. The tube was sealed and the mixture was stirred at 40 °C for 12 h. After the reaction was cooled to room temperature, the mixture was filtered through a celite pad and the solid was washed with EtOAc (5 mL × 3). After the collected solvents were removed under reduced

pressure, the residue was purified by silica gel column chromatography to provide **4** (21.1 mg, 33%) as a colorless liquid.  $er = 90 : 10$ .  $[\alpha]_D^{25} = +9.7$  (c 1.4,  $\text{CHCl}_3$ ).  $R_f = 0.5$  (PE : EtOAc = 5 : 1).

$^1\text{H NMR}$  (400 MHz,  $\text{CDCl}_3$ )  $\delta$  7.42 (d,  $J = 7.3$  Hz, 2H), 7.32 – 7.16 (m, 12H), 7.15 – 7.01 (m, 6H), 6.24 (s, 1H), 4.62 (dt,  $J = 15.3, 3.0$  Hz, 1H), 4.46 – 4.31 (m, 1H), 3.73 – 3.60 (m, 2H).

$^{13}\text{C NMR}$  (100 MHz,  $\text{CDCl}_3$ )  $\delta$  150.9 (d,  $J = 2.7$  Hz), 150.8 (d,  $J = 2.6$  Hz), 144.2 (d,  $J = 10.2$  Hz), 141.9, 136.0, 129.9, 128.8, 128.4, 127.9, 126.5, 126.0, 125.2 (d,  $J = 3.6$  Hz), 120.3 (d,  $J = 5.0$  Hz), 120.2 (d,  $J = 5.0$  Hz), 82.8 (d,  $J = 8.3$  Hz), 61.0 (d,  $J = 2.9$  Hz), 50.3 (d,  $J = 5.6$  Hz).

$^{31}\text{P NMR}$  (162 MHz,  $\text{CDCl}_3$ )  $\delta$  -3.4.

**HRMS** ( $\text{ESI}^+$ )  $m/z$  calc'd for  $\text{C}_{29}\text{H}_{27}\text{NO}_4\text{P}$   $[\text{M}+\text{H}]^+$ : 484.1678, found 484.1678.

**HPLC conditions:** hexane/2-propanol 85 : 15, 1.0 mL/min,  $\lambda = 210$  nm, Chiralpak IB column (4.6 mm x 250 mm),  $t_r$  (major) = 7.5 min,  $t_r$  (minor) = 9.1 min.

## VI. Gram-Scale Synthesis and Procedures of Product Derivatizations

### Gram-scale synthesis:

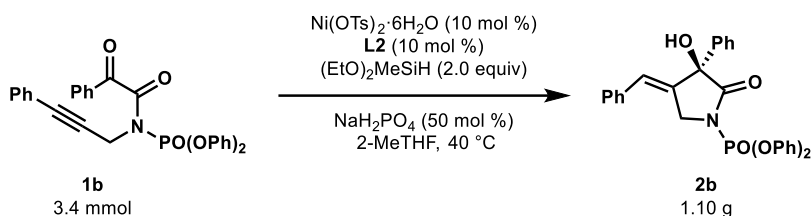

To a Schlenk flask under Ar were added  $\text{Ni}(\text{OTs})_2 \cdot 6\text{H}_2\text{O}$  (173.1 mg, 0.34 mmol, 10 mol %), **L2** (104.0 mg, 0.34 mmol, 10 mol %), and 17 mL of 2-MeTHF. The resultant solution was stirred at room temperature for 30 min, and then **1b** (1.68 g, 3.4 mmol, 1.0 equiv),  $(\text{EtO})_2\text{MeSiH}$  (0.88 mL, 6.4 mmol, 2.0 equiv), and 17 mL of 2-MeTHF were added. The flask was sealed and the mixture was stirred at 40 °C for 14 h. After the reaction was cooled to room temperature, the mixture was filtered through a celite pad and the pad was washed with EtOAc (30 mL × 3). After the collected solvents were removed under reduced pressure, the residue was purified by silica gel column chromatography to provide the desired product **2b** (1.10 g, 65%) as a white solid.  $er = 94 : 6$ .

### Procedures of Product Derivatizations:

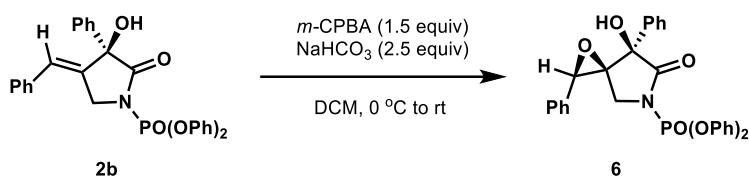

**Diphenyl ((2*R*,3*S*,7*R*)-7-hydroxy-6-oxo-2,7-diphenyl-1-oxa-5-azaspiro[2.4]heptan-5-yl)phosphonate (6)**

The reported procedure was followed [2]. To a mixture of **2b** (49.7 mg, 0.10 mmol, 1.0 equiv) and NaHCO<sub>3</sub> (21.7 mg, 0.25 mmol, 2.5 equiv) in DCM (2 mL) was added *m*-CPBA (85%, 30.4 mg, 0.15 mmol, 1.5 equiv) at 0 °C. The mixture was stirred at room temperature for 6 h, and then it was quenched by sat. Na<sub>2</sub>S<sub>2</sub>O<sub>3</sub>. The mixture was extracted with EtOAc (10 mL × 3). The combined organic layers were washed with brine, dried over anhydrous Na<sub>2</sub>SO<sub>4</sub>, and filtered. The filtrates were removed under reduced pressure and the desired product **6** (45.3 mg, 88%) was obtained as a colorless liquid after purification by silica gel chromatography. er = 96 : 4. [α]<sub>D</sub><sup>25</sup> = +19.58 (c 4.0, CHCl<sub>3</sub>). R<sub>f</sub> = 0.5 (PE / EtOAc = 2 / 1).

<sup>1</sup>H NMR (400 MHz, CDCl<sub>3</sub>) δ 7.37 – 7.23 (m, 9H), 7.23 – 7.17 (m, 4H), 7.11 – 7.00 (m, 5H), 6.99 – 6.87 (m, 2H), 4.00 (s, 1H), 3.67 (dd, *J* = 12.8, 1.6 Hz, 1H), 3.59 (d, *J* = 12.8 Hz, 1H).

<sup>13</sup>C NMR (100 MHz, CDCl<sub>3</sub>) δ 174.7 (d, *J* = 2.1 Hz), 149.9 (d, *J* = 6.9 Hz), 149.5 (d, *J* = 6.6 Hz), 136.9, 132.4, 130.1 (d, *J* = 1.3 Hz), 129.9 (d, *J* = 1.2 Hz), 129.21, 129.20, 129.04, 129.01, 126.2 (d, *J* = 1.7 Hz), 126.0 (d, *J* = 1.6 Hz), 125.7, 125.4, 120.7 (d, *J* = 4.5 Hz), 120.5 (d, *J* = 4.6 Hz), 76.1 (d, *J* = 8.8 Hz), 68.3 (d, *J* = 9.3 Hz), 60.1, 48.8 (d, *J* = 5.1 Hz).

<sup>31</sup>P NMR (162 MHz, CDCl<sub>3</sub>) δ –12.6

HRMS (ESI<sup>+</sup>) *m/z* calc'd for C<sub>29</sub>H<sub>25</sub>NO<sub>6</sub>P [M+H]<sup>+</sup>: 514.1414, found 514.1413.

**HPLC conditions:** hexane/2-propanol 80 : 20, 1.0 mL/min, λ = 280 nm, Chiralcel OD-H column (4.6 mm x 250 mm), t<sub>r</sub> (major) = 6.4 min, t<sub>r</sub> (minor) = 9.1 min.

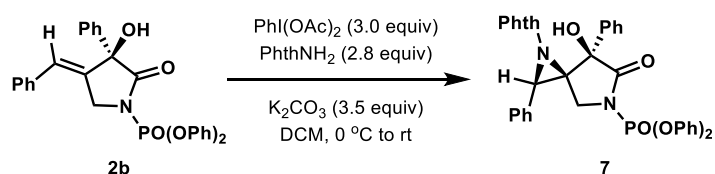

**Diphenyl ((2*R*,3*S*,7*R*)-1-(1,3-dioxoisindolin-2-yl)-7-hydroxy-6-oxo-2,7-diphenyl-1,5-diazaspiro[2.4]heptan-5-yl)phosphonate (7)**

The reported procedure was followed [5]. To a mixture of **2b** (49.5 mg, 0.10 mmol, 1.0 equiv), K<sub>2</sub>CO<sub>3</sub> (48.4 mg, 0.35 mmol, 3.5 equiv) and *N*-aminophthalimide (45.4 mg, 0.28 mmol, 2.8



equiv) in DCM (1 mL) was added (diacetoxyiodo)benzene (96.6 mg, 0.30 mmol, 3.0 equiv) at 0 °C. The mixture was stirred at room temperature for 12 h, and then it was quenched by aqueous NH<sub>4</sub>Cl. The mixture was extracted with DCM (5 mL × 3). The combined organic layers were washed with brine, dried over anhydrous Na<sub>2</sub>SO<sub>4</sub>, and filtered. The filtrates were removed under reduced pressure and the desired product **7** (57.2 mg, 87%) was obtained as a yellow liquid after purification by silica gel chromatography.  $[\alpha]_{\text{D}}^{25} = -136.42$  (c 0.4, CHCl<sub>3</sub>).  $R_f = 0.4$  (PE / EtOAc = 2 / 1).

**<sup>1</sup>H NMR** (400 MHz, CDCl<sub>3</sub>)  $\delta$  7.75 – 7.67 (m, 2H), 7.63 – 7.57 (m, 2H), 7.40 – 7.34 (m, 2H), 7.34 – 7.28 (m, 2H), 7.28 – 7.13 (m, 12H), 7.17 – 7.05 (m, 2H), 6.99 – 6.94 (m, 2H), 4.50 (s, 1H), 3.81 (AB,  $J = 11.7$  Hz, 1H), 3.45 (brs, 1H), 3.37 (BA,  $J = 11.7$  Hz, 1H).

**<sup>13</sup>C NMR** (100 MHz, CDCl<sub>3</sub>)  $\delta$  175.0, 165.5, 150.1 (d,  $J = 7.1$  Hz), 149.9 (d,  $J = 6.8$  Hz), 138.9, 134.2, 132.9, 130.7, 130.03, 130.00, 129.2, 129.1, 128.8, 128.3, 126.9, 126.0, 125.5, 123.4, 121.1 (d,  $J = 4.5$  Hz), 120.7 (d,  $J = 4.9$  Hz), 79.3 (d,  $J = 9.3$  Hz), 55.9 (d,  $J = 9.1$  Hz), 49.7, 49.5.

**<sup>31</sup>P NMR** (162 MHz, CDCl<sub>3</sub>)  $\delta$  -12.2

**HRMS** (ESI<sup>+</sup>)  $m/z$  calc'd for C<sub>37</sub>H<sub>29</sub>N<sub>3</sub>O<sub>7</sub>P [M+H]<sup>+</sup>: 658.1738, found 658.1732.

**HPLC conditions:** hexane/2-propanol 80 : 20, 1.0 mL/min,  $\lambda = 254$  nm, Chiralcel OD-H column (4.6 mm x 250 mm),  $t_r$  (major) = 6.4 min,  $t_r$  (minor) = 11.2 min.

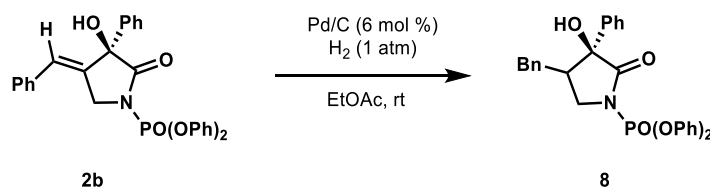

### Diphenyl ((3*S*)-4-benzyl-3-hydroxy-2-oxo-3-phenylpyrrolidin-1-yl)phosphonate (**8**)

To a Schlenk tube were added **2b** (49.5 mg, 0.10 mmol, 1.0 equiv), Pd/C (5.8 mg, 0.06 mmol), with H<sub>2</sub>. The reaction was stirred at room temperature for 3 h, the mixture was filtered through a celite pad and the solid was washed with EtOAc (5 mL × 3). After the collected solvents were removed under reduced pressure and the desired product **8** (46.6 mg, 94%) was obtained as a colorless liquid after purification by silica gel chromatography.  $[\alpha]_{\text{D}}^{25} = +46.62$  (c 2.1, CHCl<sub>3</sub>).  $R_f = 0.6$  (PE / EtOAc = 2 / 1).

For the major isomer: **<sup>1</sup>H NMR** (400 MHz, CDCl<sub>3</sub>)  $\delta$  7.37 – 7.28 (m, 4H), 7.28 – 7.24 (m, 3H), 7.23 – 7.17 (m, 4H), 7.18 – 7.12 (m, 3H), 7.10 – 7.05 (m, 2H), 6.96 – 6.92 (m, 2H), 6.90 – 6.85

(m, 2H), 3.54 (ddd,  $J = 10.4, 7.4, 2.6$  Hz, 1H), 3.07 (t,  $J = 10.5$  Hz, 1H), 2.71 – 2.57 (m, 2H), 1.63 – 1.52 (m, 1H).

$^{13}\text{C}$  NMR (100 MHz,  $\text{CDCl}_3$ )  $\delta$  178.6, 150.0 (d,  $J = 6.5$  Hz), 149.9 (d,  $J = 6.9$  Hz), 140.1, 138.6, 138.0, 137.2, 130.2, 130.1, 128.8, 128.7, 128.6, 126.7, 126.1, 125.5, 120.8 (d,  $J = 4.9$  Hz), 120.7 (d,  $J = 4.9$  Hz), 81.4 (d,  $J = 9.8$  Hz), 49.1 (d,  $J = 3.8$  Hz), 48.2 (d,  $J = 6.0$  Hz), 34.6.

$^{31}\text{P}$  NMR (162 MHz,  $\text{CDCl}_3$ )  $\delta$  -12.3.

HRMS (ESI<sup>+</sup>)  $m/z$  calc'd for  $\text{C}_{29}\text{H}_{27}\text{NO}_5\text{P}$   $[\text{M}+\text{H}]^+$ : 500.1621, found 500.1616.

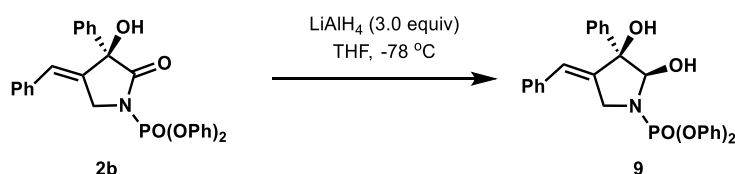

**Diphenyl ((2*R*,3*R*)-4-((*E*)-benzylidene)-2,3-dihydroxy-3-phenylpyrrolidin-1-yl)phosphonate (9)**

A solution of **2b** (25.1 mg, 0.05 mmol, 1.0 equiv) in THF (1 mL) was cooled to  $-78$  °C, and  $\text{LiAlH}_4$  (1.0 M in THF, 0.15 mL, 0.15 mmol, 0.15 equiv) was added. The mixture was stirred at  $-78$  °C for 1h, The solution was quenched with vigorous stirring by the addition of aqueous potassium sodium tartrate solution (2 mL) until the solution was stratified. The mixture was extracted with EtOAc (3 mL  $\times$  3). The combined organic layers were washed with brine, dried over anhydrous  $\text{Na}_2\text{SO}_4$ . The filtrates were removed under reduced pressure and the desired product **9** (16.8 mg, 68%) was obtained as a white solid after purification by silica gel chromatography.  $[\alpha]_D^{25} = +106.54$  (c 1.3,  $\text{CHCl}_3$ ).  $R_f = 0.3$  (PE : EtOAc = 2 : 1).

$^1\text{H}$  NMR (400 MHz,  $\text{CDCl}_3$ )  $\delta$  7.43 – 7.34 (m, 4H), 7.29 – 7.19 (m, 9H), 7.16 – 7.06 (m, 5H), 6.94 – 6.90 (m, 2H), 6.84 (d,  $J = 2.3$  Hz, 1H), 5.44 (d,  $J = 2.1$  Hz, 1H), 5.32 (brs, 1H), 4.47 (dt,  $J = 14.5, 1.9$  Hz, 1H), 4.34 – 4.26 (m, 1H), 3.34 (brs, 1H).

$^{13}\text{C}$  NMR (100 MHz,  $\text{CDCl}_3$ )  $\delta$  150.4 (d,  $J = 6.9$  Hz), 150.3 (d,  $J = 6.9$  Hz), 142.0, 140.4 (d,  $J = 9.8$  Hz), 136.2, 129.89, 129.86, 128.84, 128.77, 128.6, 128.2, 127.6, 126.6, 126.3, 125.4, 125.3, 120.4 (d,  $J = 4.8$  Hz), 119.9 (d,  $J = 5.0$  Hz), 86.6 (d,  $J = 4.3$  Hz), 82.7 (d,  $J = 11.4$  Hz), 48.2 (d,  $J = 4.7$  Hz).

$^{31}\text{P}$  NMR (162 MHz,  $\text{CDCl}_3$ )  $\delta$  -4.3

HRMS (ESI<sup>+</sup>)  $m/z$  calc'd for  $\text{C}_{29}\text{H}_{26}\text{NO}_5\text{PNa}$   $[\text{M}+\text{Na}]^+$ : 522.1441, found 522.1433.

**HPLC conditions:** hexane/2-propanol 85 : 15, 1.0 mL/min,  $\lambda = 254$  nm, Chiralpak AD-H column (4.6 mm x 250 mm),  $t_r$  (major) = 24.8 min,  $t_r$  (minor) = 20.6 min.

## VII. X-ray Crystallography Data of 2b

The crystals of **2b** (>99.5:0.5 er) were grown by vapor diffusion method (DCM and EtOAc) at 25 °C. Data were collected on Rigaku XtaLAB AFC11 kappa diffractometer equipped with a CCD area detector and operated (45kV, 0.65mA) to generate Cu K $\alpha$  radiation ( $\lambda = 1.5418$  Å).

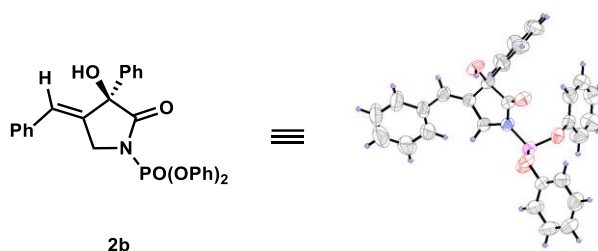

**Table S10. Crystal data and structure refinement for 2b.**

|                                 |                                                   |                       |
|---------------------------------|---------------------------------------------------|-----------------------|
| Identification code             | CCDC 2246876                                      |                       |
| Empirical formula               | C <sub>29</sub> H <sub>24</sub> NO <sub>5</sub> P |                       |
| Formula weight                  | 497.46                                            |                       |
| Temperature                     | 293.15 K                                          |                       |
| Wavelength                      | 1.54184 Å                                         |                       |
| Crystal system                  | Orthorhombic                                      |                       |
| Space group                     | P2 <sub>1</sub> 2 <sub>1</sub> 2 <sub>1</sub>     |                       |
| Unit cell dimensions            | a = 9.5892(2) Å                                   | $\alpha = 90^\circ$ . |
|                                 | b = 11.5377(2) Å                                  | $\beta = 90^\circ$ .  |
|                                 | c = 23.4103(4) Å                                  | $\gamma = 90^\circ$ . |
| Volume                          | 2590.05(8) Å <sup>3</sup>                         |                       |
| Z                               | 4                                                 |                       |
| Density (calculated)            | 1.276 Mg/m <sup>3</sup>                           |                       |
| Absorption coefficient          | 1.266 mm <sup>-1</sup>                            |                       |
| F(000)                          | 1040                                              |                       |
| Crystal size                    | 0.04 x 0.04 x 0.01 mm <sup>3</sup>                |                       |
| Theta range for data collection | 3.776 to 71.683°.                                 |                       |
| Index ranges                    | -11 ≤ h ≤ 11, -14 ≤ k ≤ 14, -28 ≤ l ≤ 28          |                       |
| Reflections collected           | 53502                                             |                       |

|                                   |                                             |
|-----------------------------------|---------------------------------------------|
| Independent reflections           | 5021 [R(int) = 0.0576]                      |
| Completeness to theta = 67.684°   | 99.9 %                                      |
| Absorption correction             | Semi-empirical from equivalents             |
| Max. and min. transmission        | 1.00000 and 0.89259                         |
| Refinement method                 | Full-matrix least-squares on F <sup>2</sup> |
| Data / restraints / parameters    | 5021 / 0 / 326                              |
| Goodness-of-fit on F <sup>2</sup> | 1.060                                       |
| Final R indices [I>2sigma(I)]     | R1 = 0.0340, wR2 = 0.0858                   |
| R indices (all data)              | R1 = 0.0396, wR2 = 0.0889                   |
| Absolute structure parameter      | -0.008(9)                                   |
| Extinction coefficient            | n/a                                         |
| Largest diff. peak and hole       | 0.141 and -0.232 e.Å <sup>-3</sup>          |

**Table S11. Atomic coordinates (  $\times 10^4$ ) and equivalent isotropic displacement parameters ( $\text{\AA}^2 \times 10^3$ ) for 2b.  $U(\text{eq})$  is defined as one third of the trace of the orthogonalized  $U_{ij}$  tensor.**

|       | x        | y       | z       | U(eq) |
|-------|----------|---------|---------|-------|
| P(1)  | 4575(1)  | 3445(1) | 1788(1) | 48(1) |
| O(3)  | 5770(2)  | 3453(2) | 1330(1) | 56(1) |
| O(4)  | 6723(2)  | 1625(2) | 2197(1) | 60(1) |
| O(1)  | 3786(2)  | 2299(1) | 1637(1) | 55(1) |
| O(2)  | 3728(2)  | 4486(2) | 1823(1) | 63(1) |
| O(5)  | 7329(2)  | 1607(2) | 3417(1) | 62(1) |
| N(1)  | 5306(2)  | 3170(2) | 2414(1) | 48(1) |
| C(11) | 6935(3)  | 2622(2) | 3123(1) | 46(1) |
| C(10) | 6343(3)  | 2368(2) | 2524(1) | 45(1) |
| C(12) | 8266(2)  | 3334(2) | 3036(1) | 46(1) |
| C(24) | 2982(3)  | 2199(2) | 1127(1) | 51(1) |
| C(18) | 6752(3)  | 4375(2) | 1302(1) | 53(1) |
| C(8)  | 5761(2)  | 3303(2) | 3396(1) | 48(1) |
| C(7)  | 5548(3)  | 3362(2) | 3958(1) | 57(1) |
| C(13) | 9419(3)  | 2799(2) | 2798(1) | 60(1) |
| C(9)  | 4874(3)  | 3821(2) | 2933(1) | 56(1) |
| C(15) | 10735(3) | 4550(3) | 2849(1) | 74(1) |
| C(17) | 8369(3)  | 4498(2) | 3174(1) | 66(1) |
| C(6)  | 4426(3)  | 3929(3) | 4282(1) | 65(1) |
| C(23) | 8068(3)  | 4170(3) | 1490(1) | 70(1) |
| C(29) | 3467(3)  | 1514(3) | 700(1)  | 67(1) |
| C(14) | 10647(3) | 3399(3) | 2707(1) | 70(1) |
| C(16) | 9608(4)  | 5087(3) | 3082(2) | 81(1) |
| C(1)  | 3500(4)  | 4721(4) | 4062(1) | 85(1) |
| C(19) | 6382(4)  | 5407(3) | 1064(2) | 78(1) |
| C(28) | 2662(4)  | 1359(3) | 221(1)  | 83(1) |
| C(25) | 1716(3)  | 2720(3) | 1097(1) | 77(1) |
| C(22) | 9061(4)  | 5030(3) | 1447(2) | 79(1) |
| C(21) | 8707(4)  | 6081(3) | 1214(2) | 79(1) |
| C(27) | 1384(4)  | 1878(4) | 180(1)  | 88(1) |
| C(20) | 7370(4)  | 6266(3) | 1020(2) | 93(1) |
| C(26) | 917(4)   | 2543(4) | 613(2)  | 99(1) |

*Supporting Information for Zeng et al*

---

|      |         |         |         |        |
|------|---------|---------|---------|--------|
| C(5) | 4289(4) | 3641(4) | 4859(1) | 97(1)  |
| C(4) | 3241(6) | 4111(5) | 5191(2) | 122(2) |
| C(3) | 2325(6) | 4872(6) | 4958(2) | 138(2) |
| C(2) | 2435(5) | 5186(5) | 4394(2) | 119(2) |

---

**Table S12. Bond lengths [Å] and angles [°] for 2b.**

---

|             |            |
|-------------|------------|
| P(1)-O(3)   | 1.5703(18) |
| P(1)-O(1)   | 1.5642(18) |
| P(1)-O(2)   | 1.4531(18) |
| P(1)-N(1)   | 1.6547(19) |
| O(3)-C(18)  | 1.422(3)   |
| O(4)-C(10)  | 1.207(3)   |
| O(1)-C(24)  | 1.424(3)   |
| O(5)-H(5)   | 0.8200     |
| O(5)-C(11)  | 1.410(3)   |
| N(1)-C(10)  | 1.382(3)   |
| N(1)-C(9)   | 1.488(3)   |
| C(11)-C(10) | 1.539(3)   |
| C(11)-C(12) | 1.531(3)   |
| C(11)-C(8)  | 1.514(3)   |
| C(12)-C(13) | 1.383(4)   |
| C(12)-C(17) | 1.384(4)   |
| C(24)-C(29) | 1.356(4)   |
| C(24)-C(25) | 1.357(4)   |
| C(18)-C(23) | 1.358(4)   |
| C(18)-C(19) | 1.362(4)   |
| C(8)-C(7)   | 1.334(3)   |
| C(8)-C(9)   | 1.502(3)   |
| C(7)-H(7)   | 0.9300     |
| C(7)-C(6)   | 1.470(4)   |
| C(13)-H(13) | 0.9300     |
| C(13)-C(14) | 1.384(4)   |
| C(9)-H(9A)  | 0.9700     |
| C(9)-H(9B)  | 0.9700     |
| C(15)-H(15) | 0.9300     |
| C(15)-C(14) | 1.372(4)   |
| C(15)-C(16) | 1.360(5)   |
| C(17)-H(17) | 0.9300     |
| C(17)-C(16) | 1.386(4)   |
| C(6)-C(1)   | 1.375(5)   |
| C(6)-C(5)   | 1.397(4)   |
| C(23)-H(23) | 0.9300     |

|                 |            |
|-----------------|------------|
| C(23)-C(22)     | 1.379(4)   |
| C(29)-H(29)     | 0.9300     |
| C(29)-C(28)     | 1.373(4)   |
| C(14)-H(14)     | 0.9300     |
| C(16)-H(16)     | 0.9300     |
| C(1)-H(1)       | 0.9300     |
| C(1)-C(2)       | 1.392(5)   |
| C(19)-H(19)     | 0.9300     |
| C(19)-C(20)     | 1.375(5)   |
| C(28)-H(28)     | 0.9300     |
| C(28)-C(27)     | 1.367(5)   |
| C(25)-H(25)     | 0.9300     |
| C(25)-C(26)     | 1.384(4)   |
| C(22)-H(22)     | 0.9300     |
| C(22)-C(21)     | 1.373(5)   |
| C(21)-H(21)     | 0.9300     |
| C(21)-C(20)     | 1.377(5)   |
| C(27)-H(27)     | 0.9300     |
| C(27)-C(26)     | 1.348(5)   |
| C(20)-H(20)     | 0.9300     |
| C(26)-H(26)     | 0.9300     |
| C(5)-H(5A)      | 0.9300     |
| C(5)-C(4)       | 1.381(6)   |
| C(4)-H(4)       | 0.9300     |
| C(4)-C(3)       | 1.357(8)   |
| C(3)-H(3)       | 0.9300     |
| C(3)-C(2)       | 1.372(7)   |
| C(2)-H(2)       | 0.9300     |
| O(3)-P(1)-N(1)  | 107.28(10) |
| O(1)-P(1)-O(3)  | 101.71(10) |
| O(1)-P(1)-N(1)  | 104.12(9)  |
| O(2)-P(1)-O(3)  | 116.23(11) |
| O(2)-P(1)-O(1)  | 116.21(11) |
| O(2)-P(1)-N(1)  | 110.17(10) |
| C(18)-O(3)-P(1) | 121.26(15) |
| C(24)-O(1)-P(1) | 121.30(15) |
| C(11)-O(5)-H(5) | 109.5      |



|                   |            |
|-------------------|------------|
| C(10)-N(1)-P(1)   | 126.78(16) |
| C(10)-N(1)-C(9)   | 112.65(19) |
| C(9)-N(1)-P(1)    | 120.57(16) |
| O(5)-C(11)-C(10)  | 112.64(18) |
| O(5)-C(11)-C(12)  | 106.64(19) |
| O(5)-C(11)-C(8)   | 115.1(2)   |
| C(12)-C(11)-C(10) | 106.78(18) |
| C(8)-C(11)-C(10)  | 102.09(19) |
| C(8)-C(11)-C(12)  | 113.36(18) |
| O(4)-C(10)-N(1)   | 125.0(2)   |
| O(4)-C(10)-C(11)  | 127.0(2)   |
| N(1)-C(10)-C(11)  | 107.95(19) |
| C(13)-C(12)-C(11) | 118.7(2)   |
| C(13)-C(12)-C(17) | 118.0(2)   |
| C(17)-C(12)-C(11) | 123.3(2)   |
| C(29)-C(24)-O(1)  | 118.6(2)   |
| C(29)-C(24)-C(25) | 121.8(3)   |
| C(25)-C(24)-O(1)  | 119.5(2)   |
| C(23)-C(18)-O(3)  | 118.0(2)   |
| C(23)-C(18)-C(19) | 121.8(3)   |
| C(19)-C(18)-O(3)  | 120.1(3)   |
| C(7)-C(8)-C(11)   | 123.9(2)   |
| C(7)-C(8)-C(9)    | 127.3(2)   |
| C(9)-C(8)-C(11)   | 108.81(19) |
| C(8)-C(7)-H(7)    | 115.0      |
| C(8)-C(7)-C(6)    | 130.1(3)   |
| C(6)-C(7)-H(7)    | 115.0      |
| C(12)-C(13)-H(13) | 119.3      |
| C(14)-C(13)-C(12) | 121.3(3)   |
| C(14)-C(13)-H(13) | 119.3      |
| N(1)-C(9)-C(8)    | 103.4(2)   |
| N(1)-C(9)-H(9A)   | 111.1      |
| N(1)-C(9)-H(9B)   | 111.1      |
| C(8)-C(9)-H(9A)   | 111.1      |
| C(8)-C(9)-H(9B)   | 111.1      |
| H(9A)-C(9)-H(9B)  | 109.1      |
| C(14)-C(15)-H(15) | 120.3      |
| C(16)-C(15)-H(15) | 120.3      |

|                   |          |
|-------------------|----------|
| C(16)-C(15)-C(14) | 119.3(3) |
| C(12)-C(17)-H(17) | 120.0    |
| C(12)-C(17)-C(16) | 120.1(3) |
| C(16)-C(17)-H(17) | 120.0    |
| C(1)-C(6)-C(7)    | 125.1(3) |
| C(1)-C(6)-C(5)    | 117.4(3) |
| C(5)-C(6)-C(7)    | 117.5(3) |
| C(18)-C(23)-H(23) | 120.2    |
| C(18)-C(23)-C(22) | 119.5(3) |
| C(22)-C(23)-H(23) | 120.2    |
| C(24)-C(29)-H(29) | 120.5    |
| C(24)-C(29)-C(28) | 119.0(3) |
| C(28)-C(29)-H(29) | 120.5    |
| C(13)-C(14)-H(14) | 120.0    |
| C(15)-C(14)-C(13) | 119.9(3) |
| C(15)-C(14)-H(14) | 120.0    |
| C(15)-C(16)-C(17) | 121.3(3) |
| C(15)-C(16)-H(16) | 119.3    |
| C(17)-C(16)-H(16) | 119.3    |
| C(6)-C(1)-H(1)    | 119.3    |
| C(6)-C(1)-C(2)    | 121.4(4) |
| C(2)-C(1)-H(1)    | 119.3    |
| C(18)-C(19)-H(19) | 120.6    |
| C(18)-C(19)-C(20) | 118.8(3) |
| C(20)-C(19)-H(19) | 120.6    |
| C(29)-C(28)-H(28) | 119.8    |
| C(27)-C(28)-C(29) | 120.3(3) |
| C(27)-C(28)-H(28) | 119.8    |
| C(24)-C(25)-H(25) | 120.9    |
| C(24)-C(25)-C(26) | 118.2(3) |
| C(26)-C(25)-H(25) | 120.9    |
| C(23)-C(22)-H(22) | 120.2    |
| C(21)-C(22)-C(23) | 119.6(3) |
| C(21)-C(22)-H(22) | 120.2    |
| C(22)-C(21)-H(21) | 120.1    |
| C(22)-C(21)-C(20) | 119.9(3) |
| C(20)-C(21)-H(21) | 120.1    |
| C(28)-C(27)-H(27) | 120.2    |

|                   |          |
|-------------------|----------|
| C(26)-C(27)-C(28) | 119.5(3) |
| C(26)-C(27)-H(27) | 120.2    |
| C(19)-C(20)-C(21) | 120.4(3) |
| C(19)-C(20)-H(20) | 119.8    |
| C(21)-C(20)-H(20) | 119.8    |
| C(25)-C(26)-H(26) | 119.4    |
| C(27)-C(26)-C(25) | 121.1(3) |
| C(27)-C(26)-H(26) | 119.4    |
| C(6)-C(5)-H(5A)   | 119.4    |
| C(4)-C(5)-C(6)    | 121.3(4) |
| C(4)-C(5)-H(5A)   | 119.4    |
| C(5)-C(4)-H(4)    | 120.1    |
| C(3)-C(4)-C(5)    | 119.9(4) |
| C(3)-C(4)-H(4)    | 120.1    |
| C(4)-C(3)-H(3)    | 119.7    |
| C(4)-C(3)-C(2)    | 120.6(5) |
| C(2)-C(3)-H(3)    | 119.7    |
| C(1)-C(2)-H(2)    | 120.3    |
| C(3)-C(2)-C(1)    | 119.5(5) |
| C(3)-C(2)-H(2)    | 120.3    |

---

Symmetry transformations used to generate equivalent atoms:

**Table S13. Anisotropic displacement parameters ( $\text{\AA}^2 \times 10^3$ ) for 2b. The anisotropic****displacement factor exponent takes the form:  $-2p^2 [ h^2 a^*2U11 + \dots + 2 h k a^* b^*$**  **$U12 ]$** 

|       | U11   | U22    | U33    | U23    | U13    | U12    |
|-------|-------|--------|--------|--------|--------|--------|
| P(1)  | 58(1) | 45(1)  | 41(1)  | -1(1)  | -6(1)  | 9(1)   |
| O(3)  | 70(1) | 53(1)  | 44(1)  | -5(1)  | 3(1)   | 1(1)   |
| O(4)  | 74(1) | 48(1)  | 58(1)  | -11(1) | -15(1) | 16(1)  |
| O(1)  | 64(1) | 53(1)  | 50(1)  | 2(1)   | -18(1) | 4(1)   |
| O(2)  | 78(1) | 53(1)  | 60(1)  | 0(1)   | -6(1)  | 21(1)  |
| O(5)  | 80(1) | 43(1)  | 62(1)  | 10(1)  | -28(1) | -10(1) |
| N(1)  | 53(1) | 52(1)  | 40(1)  | -6(1)  | -5(1)  | 10(1)  |
| C(11) | 53(1) | 40(1)  | 44(1)  | 3(1)   | -10(1) | -6(1)  |
| C(10) | 50(1) | 38(1)  | 48(1)  | 1(1)   | -7(1)  | -2(1)  |
| C(12) | 49(1) | 43(1)  | 47(1)  | 0(1)   | -7(1)  | -2(1)  |
| C(24) | 54(2) | 53(1)  | 44(1)  | 1(1)   | -10(1) | 2(1)   |
| C(18) | 64(2) | 54(1)  | 41(1)  | 0(1)   | 2(1)   | 5(1)   |
| C(8)  | 46(1) | 52(1)  | 45(1)  | 0(1)   | -3(1)  | -10(1) |
| C(7)  | 60(2) | 69(2)  | 43(1)  | 0(1)   | -3(1)  | -17(2) |
| C(13) | 53(2) | 51(1)  | 74(2)  | -5(1)  | -7(1)  | 4(1)   |
| C(9)  | 57(2) | 68(2)  | 42(1)  | -8(1)  | 0(1)   | 8(1)   |
| C(15) | 59(2) | 76(2)  | 88(2)  | 5(2)   | -3(2)  | -19(2) |
| C(17) | 66(2) | 47(1)  | 85(2)  | -11(1) | 14(2)  | -10(1) |
| C(6)  | 65(2) | 88(2)  | 42(1)  | -11(1) | 6(1)   | -29(2) |
| C(23) | 70(2) | 74(2)  | 65(2)  | 14(1)  | 7(2)   | 12(2)  |
| C(29) | 63(2) | 72(2)  | 67(2)  | -15(2) | -3(1)  | 7(2)   |
| C(14) | 48(2) | 79(2)  | 82(2)  | 4(2)   | -1(1)  | 2(2)   |
| C(16) | 83(2) | 54(2)  | 105(2) | -10(2) | 10(2)  | -23(2) |
| C(1)  | 76(2) | 122(3) | 57(2)  | -22(2) | 4(2)   | 1(2)   |
| C(19) | 74(2) | 69(2)  | 91(2)  | 18(2)  | -9(2)  | 9(2)   |
| C(28) | 96(3) | 97(3)  | 57(2)  | -22(2) | -1(2)  | -7(2)  |
| C(25) | 68(2) | 99(2)  | 64(2)  | -18(2) | -15(2) | 24(2)  |
| C(22) | 63(2) | 100(2) | 75(2)  | 11(2)  | 1(2)   | 1(2)   |
| C(21) | 82(2) | 73(2)  | 83(2)  | -5(2)  | 9(2)   | -8(2)  |

*Supporting Information for Zeng et al*

---

|       |        |        |        |        |        |        |
|-------|--------|--------|--------|--------|--------|--------|
| C(27) | 85(2)  | 120(3) | 58(2)  | -6(2)  | -24(2) | -5(2)  |
| C(20) | 93(3)  | 62(2)  | 123(3) | 21(2)  | 1(2)   | 7(2)   |
| C(26) | 75(2)  | 142(4) | 81(2)  | -17(2) | -28(2) | 31(2)  |
| C(5)  | 107(3) | 137(3) | 46(2)  | -3(2)  | 12(2)  | -33(3) |
| C(4)  | 116(4) | 194(5) | 56(2)  | -10(3) | 31(2)  | -38(4) |
| C(3)  | 96(3)  | 233(7) | 84(3)  | -53(4) | 32(3)  | -24(4) |
| C(2)  | 89(3)  | 184(5) | 86(3)  | -46(3) | 11(2)  | 23(3)  |

---

**Table S14. Hydrogen coordinates ( $\times 10^4$ ) and isotropic displacement parameters ( $\text{\AA}^2 \times 10^3$ ) for 2b.**

|       | x     | y    | z    | U(eq) |
|-------|-------|------|------|-------|
| H(5)  | 6893  | 1052 | 3289 | 93    |
| H(7)  | 6213  | 2985 | 4180 | 69    |
| H(13) | 9367  | 2020 | 2698 | 71    |
| H(9A) | 3891  | 3710 | 3012 | 67    |
| H(9B) | 5058  | 4644 | 2891 | 67    |
| H(15) | 11557 | 4959 | 2787 | 89    |
| H(17) | 7605  | 4885 | 3327 | 79    |
| H(23) | 8298  | 3454 | 1647 | 84    |
| H(29) | 4332  | 1155 | 732  | 81    |
| H(14) | 11413 | 3022 | 2549 | 84    |
| H(16) | 9671  | 5865 | 3183 | 97    |
| H(1)  | 3586  | 4950 | 3683 | 102   |
| H(19) | 5477  | 5530 | 935  | 94    |
| H(28) | 2988  | 899  | -76  | 100   |
| H(25) | 1393  | 3183 | 1394 | 93    |
| H(22) | 9965  | 4898 | 1575 | 95    |
| H(21) | 9370  | 6667 | 1187 | 95    |
| H(27) | 840   | 1772 | -145 | 106   |
| H(20) | 7134  | 6976 | 858  | 111   |
| H(26) | 44    | 2889 | 585  | 119   |
| H(5A) | 4915  | 3123 | 5023 | 116   |
| H(4)  | 3164  | 3906 | 5574 | 146   |
| H(3)  | 1617  | 5184 | 5182 | 165   |
| H(2)  | 1803  | 5706 | 4236 | 143   |

**Table S15. Torsion angles [°] for 2b.**

---

|                         |            |
|-------------------------|------------|
| P(1)-O(3)-C(18)-C(23)   | 106.3(3)   |
| P(1)-O(3)-C(18)-C(19)   | -77.0(3)   |
| P(1)-O(1)-C(24)-C(29)   | 109.1(3)   |
| P(1)-O(1)-C(24)-C(25)   | -75.6(3)   |
| P(1)-N(1)-C(10)-O(4)    | -11.9(4)   |
| P(1)-N(1)-C(10)-C(11)   | 166.48(17) |
| P(1)-N(1)-C(9)-C(8)     | 179.31(16) |
| O(3)-P(1)-O(1)-C(24)    | -70.24(19) |
| O(3)-P(1)-N(1)-C(10)    | -41.7(2)   |
| O(3)-P(1)-N(1)-C(9)     | 137.7(2)   |
| O(3)-C(18)-C(23)-C(22)  | 177.3(3)   |
| O(3)-C(18)-C(19)-C(20)  | -177.1(3)  |
| O(1)-P(1)-O(3)-C(18)    | 178.91(17) |
| O(1)-P(1)-N(1)-C(10)    | 65.6(2)    |
| O(1)-P(1)-N(1)-C(9)     | -115.0(2)  |
| O(1)-C(24)-C(29)-C(28)  | 176.2(3)   |
| O(1)-C(24)-C(25)-C(26)  | -175.6(3)  |
| O(2)-P(1)-O(3)-C(18)    | 51.7(2)    |
| O(2)-P(1)-O(1)-C(24)    | 57.0(2)    |
| O(2)-P(1)-N(1)-C(10)    | -169.1(2)  |
| O(2)-P(1)-N(1)-C(9)     | 10.2(2)    |
| O(5)-C(11)-C(10)-O(4)   | -36.4(3)   |
| O(5)-C(11)-C(10)-N(1)   | 145.3(2)   |
| O(5)-C(11)-C(12)-C(13)  | 51.2(3)    |
| O(5)-C(11)-C(12)-C(17)  | -130.2(3)  |
| O(5)-C(11)-C(8)-C(7)    | 32.4(3)    |
| O(5)-C(11)-C(8)-C(9)    | -144.5(2)  |
| N(1)-P(1)-O(3)-C(18)    | -72.10(19) |
| N(1)-P(1)-O(1)-C(24)    | 178.35(18) |
| C(11)-C(12)-C(13)-C(14) | 179.6(2)   |
| C(11)-C(12)-C(17)-C(16) | -179.9(3)  |
| C(11)-C(8)-C(7)-C(6)    | -176.4(2)  |
| C(11)-C(8)-C(9)-N(1)    | 15.2(3)    |
| C(10)-N(1)-C(9)-C(8)    | -1.2(3)    |
| C(10)-C(11)-C(12)-C(13) | -69.4(3)   |
| C(10)-C(11)-C(12)-C(17) | 109.2(3)   |

|                         |           |
|-------------------------|-----------|
| C(10)-C(11)-C(8)-C(7)   | 154.8(2)  |
| C(10)-C(11)-C(8)-C(9)   | -22.1(2)  |
| C(12)-C(11)-C(10)-O(4)  | 80.3(3)   |
| C(12)-C(11)-C(10)-N(1)  | -98.0(2)  |
| C(12)-C(11)-C(8)-C(7)   | -90.8(3)  |
| C(12)-C(11)-C(8)-C(9)   | 92.3(2)   |
| C(12)-C(13)-C(14)-C(15) | -0.4(5)   |
| C(12)-C(17)-C(16)-C(15) | 1.2(5)    |
| C(24)-C(29)-C(28)-C(27) | -0.8(5)   |
| C(24)-C(25)-C(26)-C(27) | -0.4(6)   |
| C(18)-C(23)-C(22)-C(21) | -0.1(5)   |
| C(18)-C(19)-C(20)-C(21) | -0.1(6)   |
| C(8)-C(11)-C(10)-O(4)   | -160.4(2) |
| C(8)-C(11)-C(10)-N(1)   | 21.2(2)   |
| C(8)-C(11)-C(12)-C(13)  | 178.9(2)  |
| C(8)-C(11)-C(12)-C(17)  | -2.4(3)   |
| C(8)-C(7)-C(6)-C(1)     | -13.7(5)  |
| C(8)-C(7)-C(6)-C(5)     | 166.2(3)  |
| C(7)-C(8)-C(9)-N(1)     | -161.6(2) |
| C(7)-C(6)-C(1)-C(2)     | 177.7(3)  |
| C(7)-C(6)-C(5)-C(4)     | -178.3(4) |
| C(13)-C(12)-C(17)-C(16) | -1.3(4)   |
| C(9)-N(1)-C(10)-O(4)    | 168.7(2)  |
| C(9)-N(1)-C(10)-C(11)   | -12.9(3)  |
| C(9)-C(8)-C(7)-C(6)     | -0.1(5)   |
| C(17)-C(12)-C(13)-C(14) | 0.9(4)    |
| C(6)-C(1)-C(2)-C(3)     | 1.6(7)    |
| C(6)-C(5)-C(4)-C(3)     | -0.3(7)   |
| C(23)-C(18)-C(19)-C(20) | -0.6(5)   |
| C(23)-C(22)-C(21)-C(20) | -0.6(5)   |
| C(29)-C(24)-C(25)-C(26) | -0.5(5)   |
| C(29)-C(28)-C(27)-C(26) | 0.0(6)    |
| C(14)-C(15)-C(16)-C(17) | -0.7(5)   |
| C(16)-C(15)-C(14)-C(13) | 0.3(5)    |
| C(1)-C(6)-C(5)-C(4)     | 1.6(5)    |
| C(19)-C(18)-C(23)-C(22) | 0.7(5)    |
| C(28)-C(27)-C(26)-C(25) | 0.6(7)    |
| C(25)-C(24)-C(29)-C(28) | 1.0(5)    |



|                         |         |
|-------------------------|---------|
| C(22)-C(21)-C(20)-C(19) | 0.7(6)  |
| C(5)-C(6)-C(1)-C(2)     | -2.2(5) |
| C(5)-C(4)-C(3)-C(2)     | -0.4(9) |
| C(4)-C(3)-C(2)-C(1)     | -0.2(8) |

---

Symmetry transformations used to generate equivalent atoms:

### VIII. References

- 1 R. Shruti, K. Ramandeep and J. Nidhi, *Org. Biomol. Chem.*, 2022, **20**, 1453.
- 2 S. Xie, D Li, H. Huang, F. Zhang and Y. Chen, *J. Am. Chem. Soc.*, 2019, **141**, 16237.
- 3 O. Shirai, H. Ito and Y. Yamamoto, *Angew. Chem. Int. Ed.*, 2014, **53**, 2658
- 4 Y. Zheng, T. Zhang and W. Shen, *Org. Biomol. Chem.*, 2021, **19**, 9688.
- 5 Y. Li and M. Xu, *Org. Lett.*, 2014, **16**, 2712
- 6 J. Hernández-T, M. M. Hussain and P. J. Walsh., *Org. Lett.*, 2011, **13**, 6094

## IX. HPLC Spectra

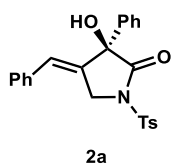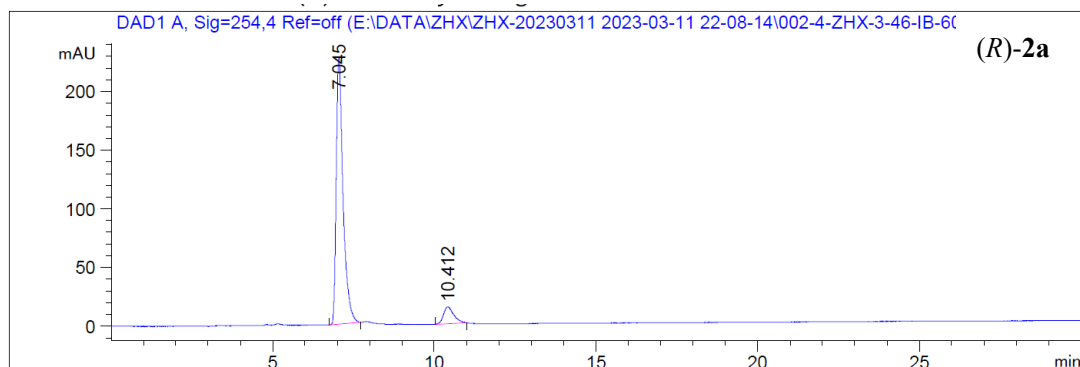

Signal 1: DAD1 A, Sig=254,4 Ref=off

| Peak # | RetTime [min] | Type | Width [min] | Area [mAU*s] | Height [mAU] | Area %  |
|--------|---------------|------|-------------|--------------|--------------|---------|
| 1      | 7.045         | VV R | 0.2152      | 3331.77124   | 227.69815    | 91.2302 |
| 2      | 10.412        | BV R | 0.2589      | 320.27921    | 14.60144     | 8.7698  |

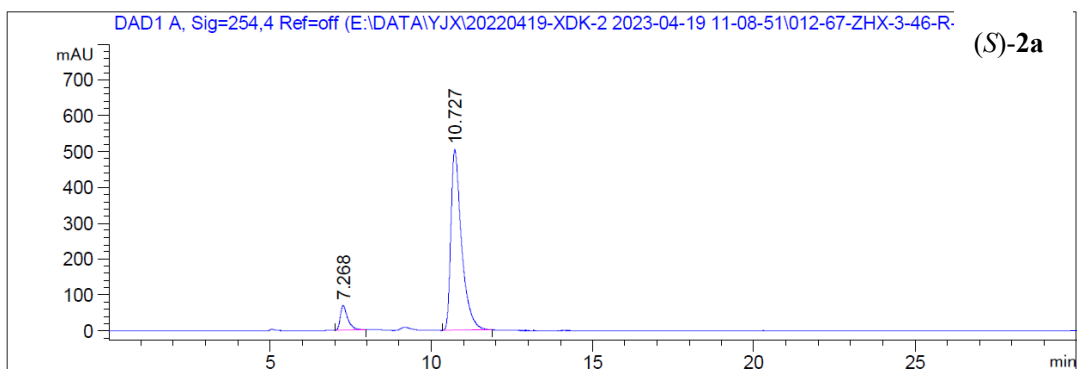

Signal 1: DAD1 A, Sig=254,4 Ref=off

| Peak # | RetTime [min] | Type | Width [min] | Area [mAU*s] | Height [mAU] | Area %  |
|--------|---------------|------|-------------|--------------|--------------|---------|
| 1      | 7.268         | VV R | 0.1978      | 1100.06995   | 68.89561     | 8.6483  |
| 2      | 10.727        | VV R | 0.3157      | 1.16200e4    | 504.46481    | 91.3517 |

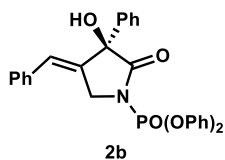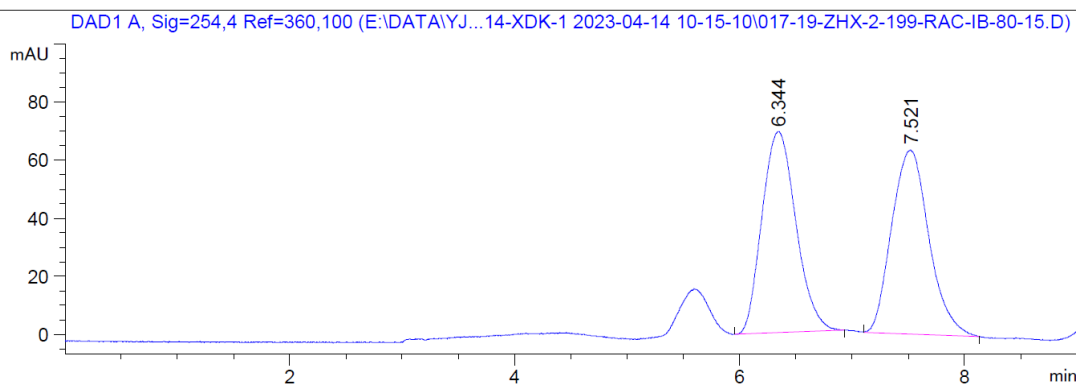

Signal 1: DAD1 A, Sig=254,4 Ref=360,100

| Peak # | RetTime [min] | Type | Width [min] | Area [mAU*s] | Height [mAU] | Area %  |
|--------|---------------|------|-------------|--------------|--------------|---------|
| 1      | 6.344         | VV R | 0.2487      | 1455.15222   | 69.22610     | 49.9526 |
| 2      | 7.521         | BV R | 0.2754      | 1457.91296   | 63.25254     | 50.0474 |

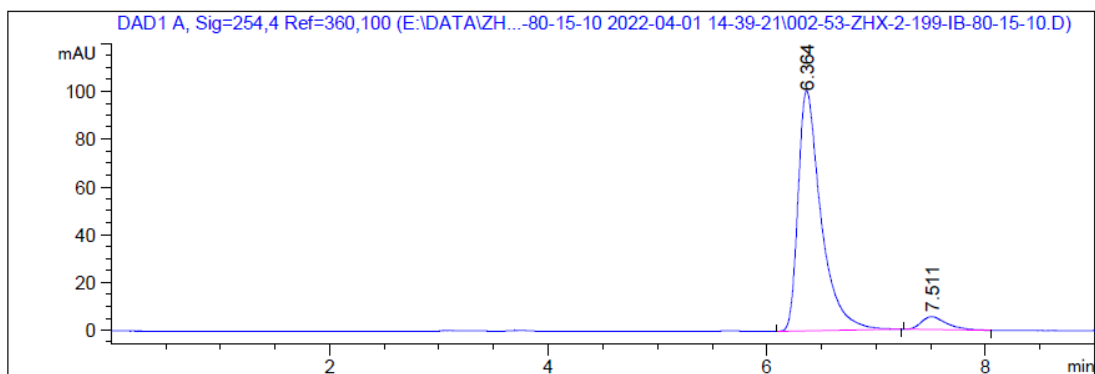

Signal 1: DAD1 A, Sig=254,4 Ref=360,100

| Peak # | RetTime [min] | Type | Width [min] | Area [mAU*s] | Height [mAU] | Area %  |
|--------|---------------|------|-------------|--------------|--------------|---------|
| 1      | 6.364         | BB   | 0.2127      | 1471.99194   | 100.59951    | 94.3238 |
| 2      | 7.511         | BB   | 0.1923      | 88.58142     | 5.46068      | 5.6762  |

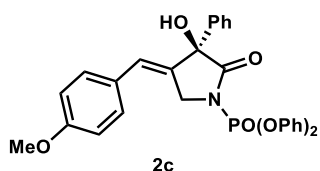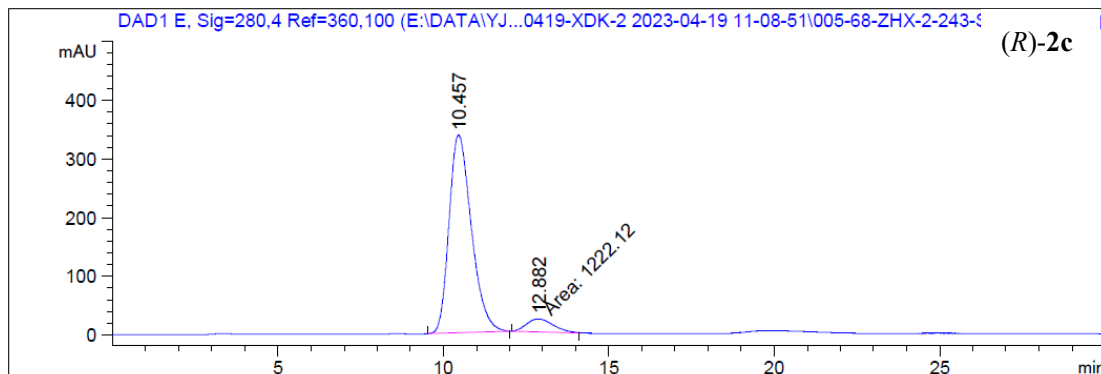

Signal 1: DAD1 E, Sig=280,4 Ref=360,100

| Peak # | RetTime [min] | Type | Width [min] | Area [mAU*s] | Height [mAU] | Area %  |
|--------|---------------|------|-------------|--------------|--------------|---------|
| 1      | 10.457        | BV R | 0.5522      | 1.58232e4    | 337.33197    | 92.8302 |
| 2      | 12.882        | MM   | 0.9188      | 1222.12036   | 22.16956     | 7.1698  |

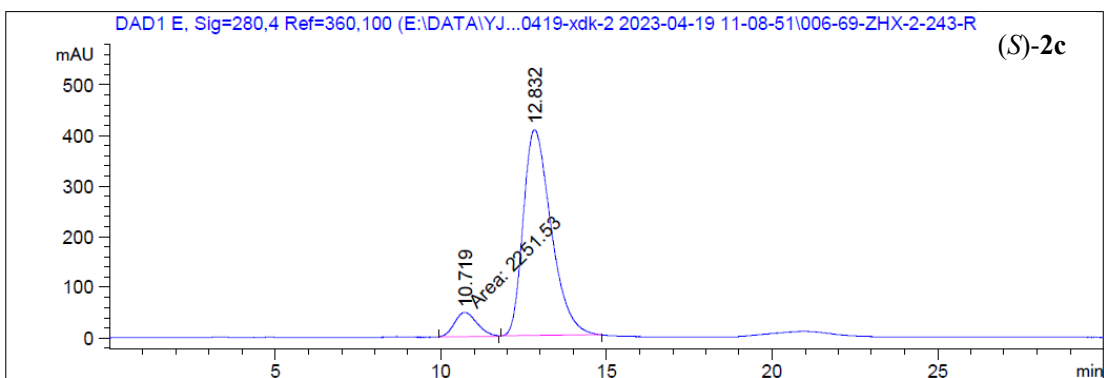

Signal 1: DAD1 E, Sig=280,4 Ref=360,100

| Peak # | RetTime [min] | Type | Width [min] | Area [mAU*s] | Height [mAU] | Area %  |
|--------|---------------|------|-------------|--------------|--------------|---------|
| 1      | 10.719        | MM   | 0.7834      | 2251.53320   | 47.89946     | 8.6065  |
| 2      | 12.832        | BV R | 0.6889      | 2.39092e4    | 406.95715    | 91.3935 |

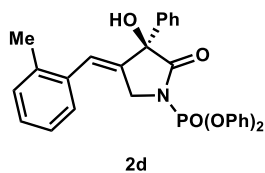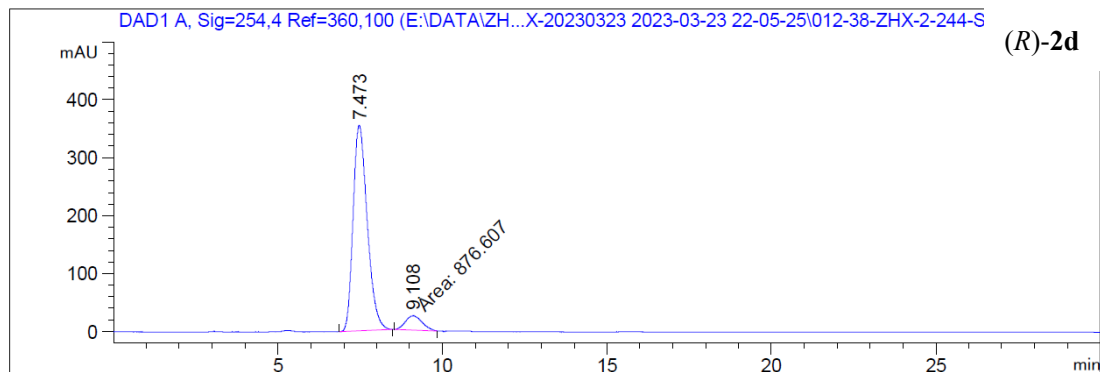

Signal 1: DAD1 A, Sig=254,4 Ref=360,100

| Peak # | RetTime [min] | Type | Width [min] | Area [mAU*s] | Height [mAU] | Area %  |
|--------|---------------|------|-------------|--------------|--------------|---------|
| 1      | 7.473         | BV R | 0.3726      | 1.06446e4    | 355.17755    | 92.3914 |
| 2      | 9.108         | MM   | 0.5896      | 876.60706    | 24.78147     | 7.6086  |

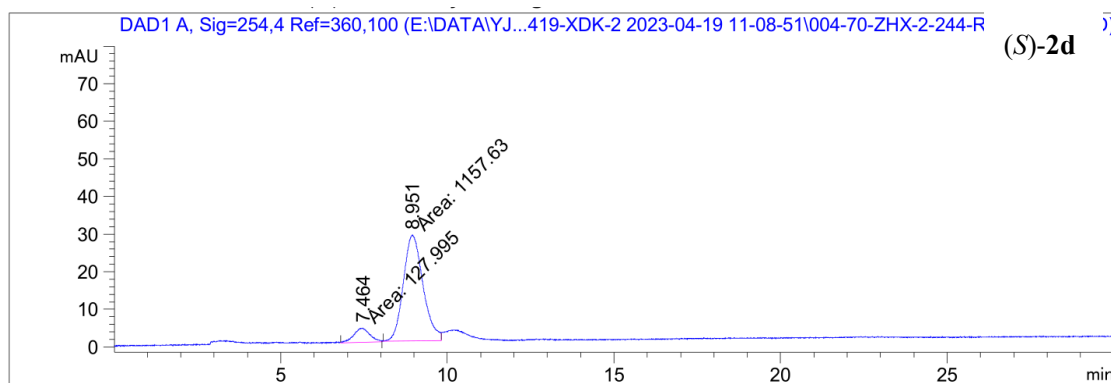

Signal 1: DAD1 A, Sig=254,4 Ref=360,100

| Peak # | RetTime [min] | Type | Width [min] | Area [mAU*s] | Height [mAU] | Area %  |
|--------|---------------|------|-------------|--------------|--------------|---------|
| 1      | 7.464         | MM   | 0.5525      | 127.99550    | 3.86116      | 9.9559  |
| 2      | 8.951         | MF   | 0.6853      | 1157.62988   | 28.15346     | 90.0441 |

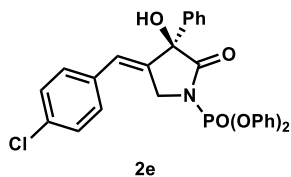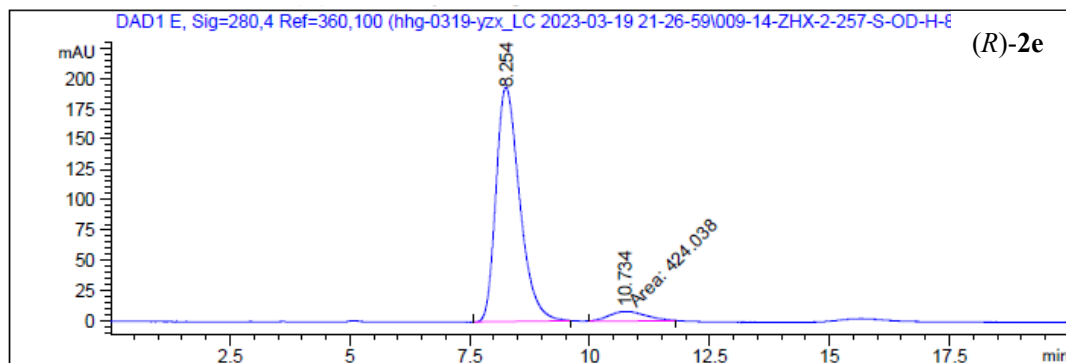

Signal 1: DAD1 E, Sig=280,4 Ref=360,100

| Peak # | RetTime [min] | Type | Width [min] | Area [mAU*s] | Height [mAU] | Area %  |
|--------|---------------|------|-------------|--------------|--------------|---------|
| 1      | 8.254         | VV R | 0.4075      | 6646.92480   | 193.37662    | 94.0031 |
| 2      | 10.734        | MM   | 0.9034      | 424.03769    | 7.82281      | 5.9969  |

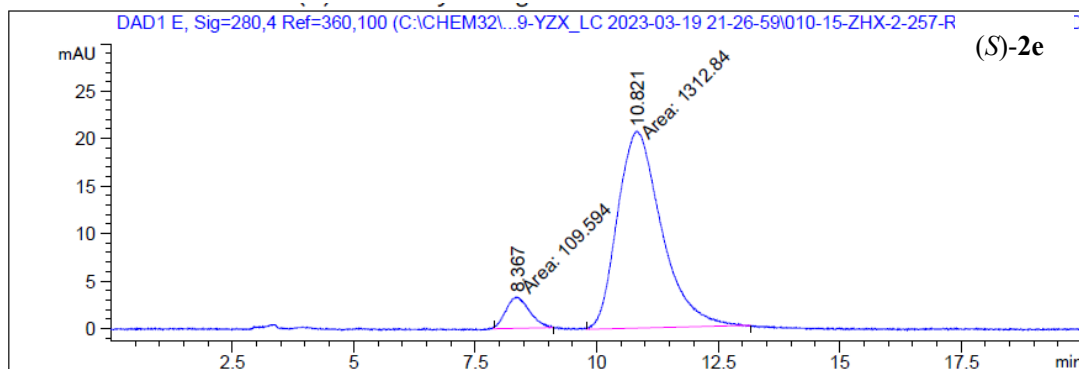

Signal 1: DAD1 E, Sig=280,4 Ref=360,100

| Peak # | RetTime [min] | Type | Width [min] | Area [mAU*s] | Height [mAU] | Area %  |
|--------|---------------|------|-------------|--------------|--------------|---------|
| 1      | 8.367         | MM   | 0.5570      | 109.59396    | 3.27942      | 7.7047  |
| 2      | 10.821        | MM   | 1.0551      | 1312.83972   | 20.73817     | 92.2953 |

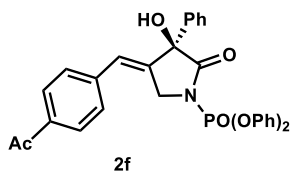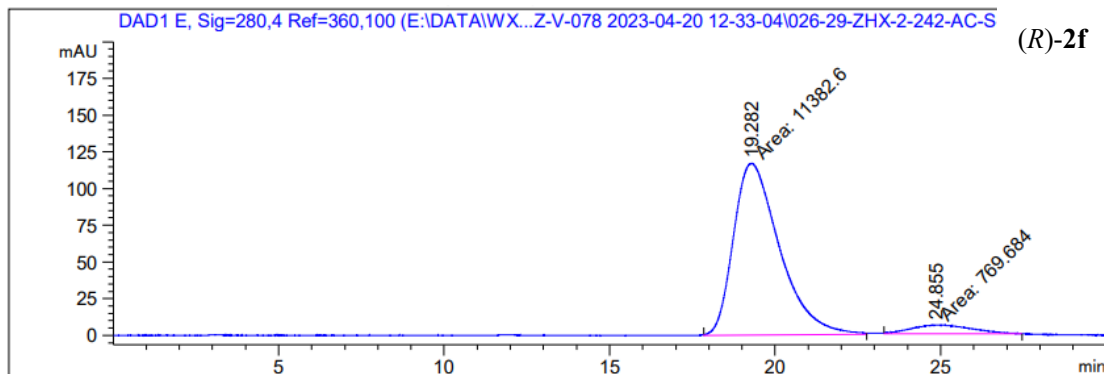

Signal 1: DAD1 E, Sig=280,4 Ref=360,100

| Peak # | RetTime [min] | Type | Width [min] | Area [mAU*s] | Height [mAU] | Area %  |
|--------|---------------|------|-------------|--------------|--------------|---------|
| 1      | 19.282        | MM   | 1.6183      | 1.13826e4    | 117.22636    | 93.6663 |
| 2      | 24.855        | MM   | 2.1248      | 769.68439    | 6.03732      | 6.3337  |

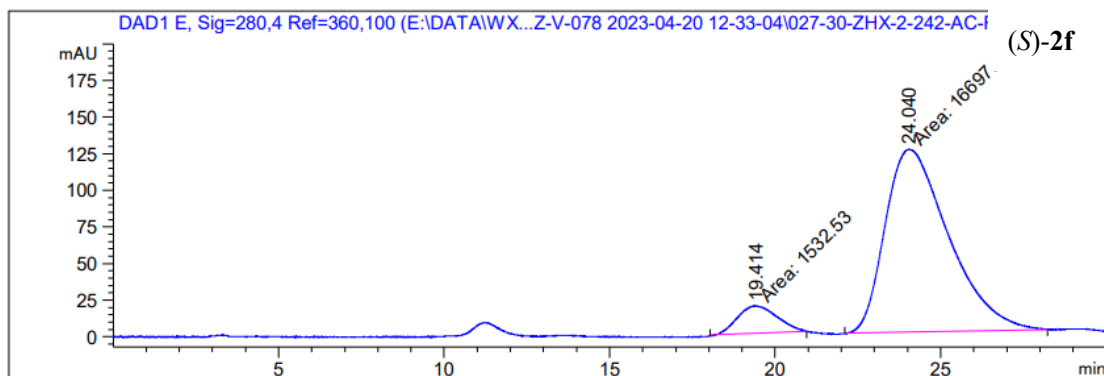

Signal 1: DAD1 E, Sig=280,4 Ref=360,100

| Peak # | RetTime [min] | Type | Width [min] | Area [mAU*s] | Height [mAU] | Area %  |
|--------|---------------|------|-------------|--------------|--------------|---------|
| 1      | 19.414        | MM   | 1.3761      | 1532.52966   | 18.56092     | 8.4065  |
| 2      | 24.040        | MM   | 2.2296      | 1.66979e4    | 124.82070    | 91.5935 |

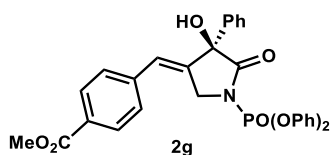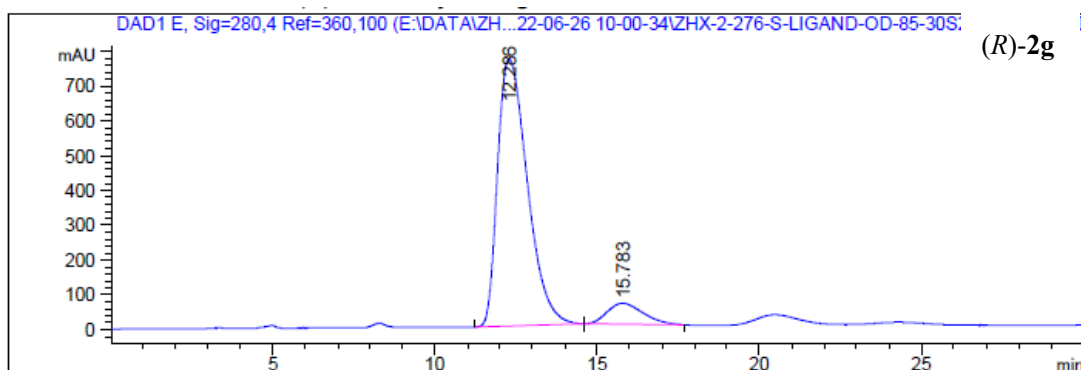

Signal 1: DAD1 E, Sig=280,4 Ref=360,100

| Peak # | RetTime [min] | Type | Width [min] | Area [mAU*s] | Height [mAU] | Area %  |
|--------|---------------|------|-------------|--------------|--------------|---------|
| 1      | 12.286        | BV R | 0.7474      | 4.89709e4    | 768.01099    | 91.3186 |
| 2      | 15.783        | BV R | 0.9077      | 4655.54443   | 60.03323     | 8.6814  |

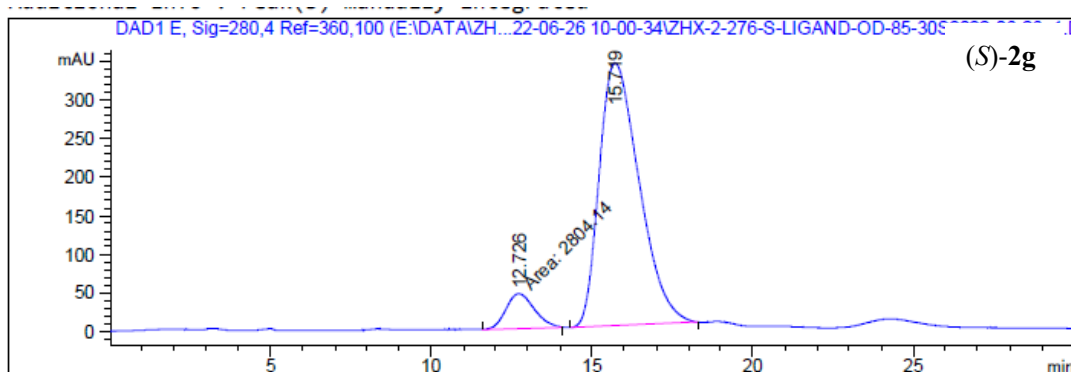

Signal 1: DAD1 E, Sig=280,4 Ref=360,100

| Peak # | RetTime [min] | Type | Width [min] | Area [mAU*s] | Height [mAU] | Area %  |
|--------|---------------|------|-------------|--------------|--------------|---------|
| 1      | 12.726        | MM   | 1.0288      | 2804.14185   | 45.42743     | 8.6837  |
| 2      | 15.719        | VV R | 1.0127      | 2.94879e4    | 340.73651    | 91.3163 |

Totals :



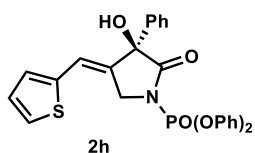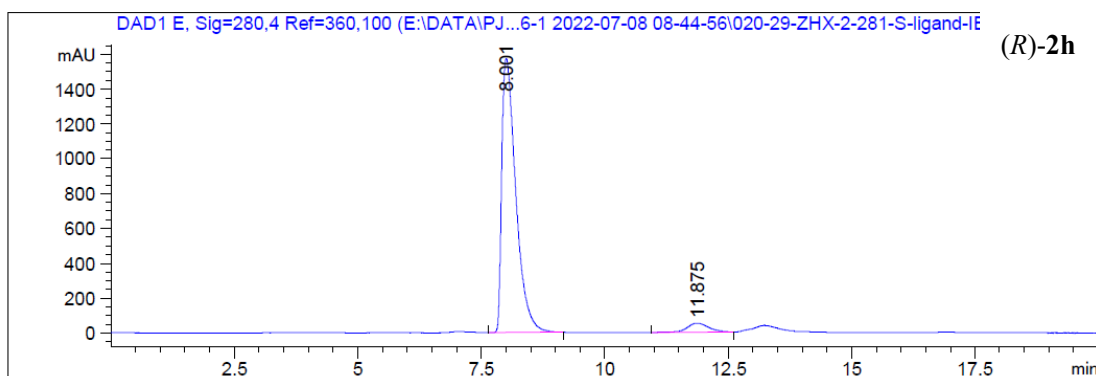

Signal 1: DAD1 E, Sig=280,4 Ref=360,100

| Peak # | RetTime [min] | Type | Width [min] | Area [mAU*s] | Height [mAU] | Area %  |
|--------|---------------|------|-------------|--------------|--------------|---------|
| 1      | 8.001         | VV R | 0.2339      | 3.11606e4    | 1574.20496   | 95.0971 |
| 2      | 11.875        | VV R | 0.3608      | 1606.55029   | 52.38714     | 4.9029  |

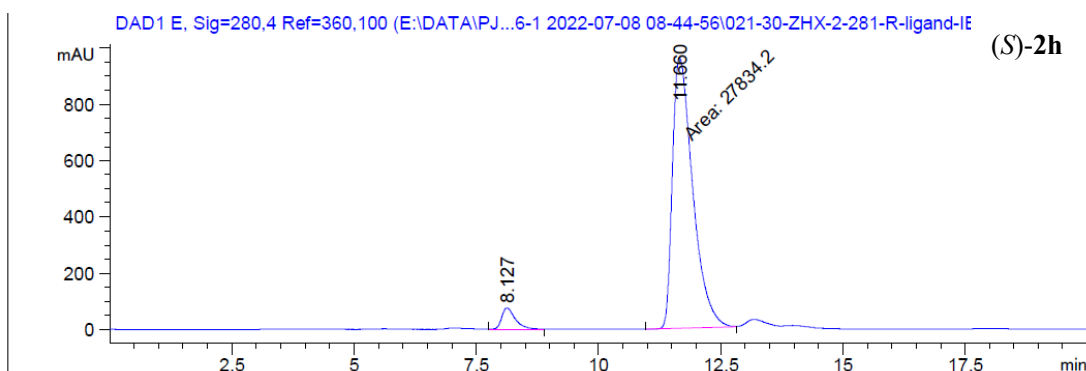

| Peak # | RetTime [min] | Type | Width [min] | Area [mAU*s] | Height [mAU] | Area %  |
|--------|---------------|------|-------------|--------------|--------------|---------|
| 1      | 8.127         | VV R | 0.2289      | 1434.59998   | 75.58652     | 4.9015  |
| 2      | 11.660        | MF   | 0.4827      | 2.78342e4    | 961.01709    | 95.0985 |

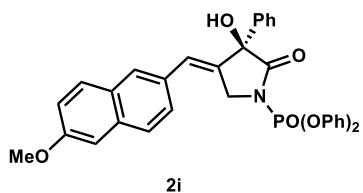

ADDITIONAL INFO : Peak(s) manually integrated

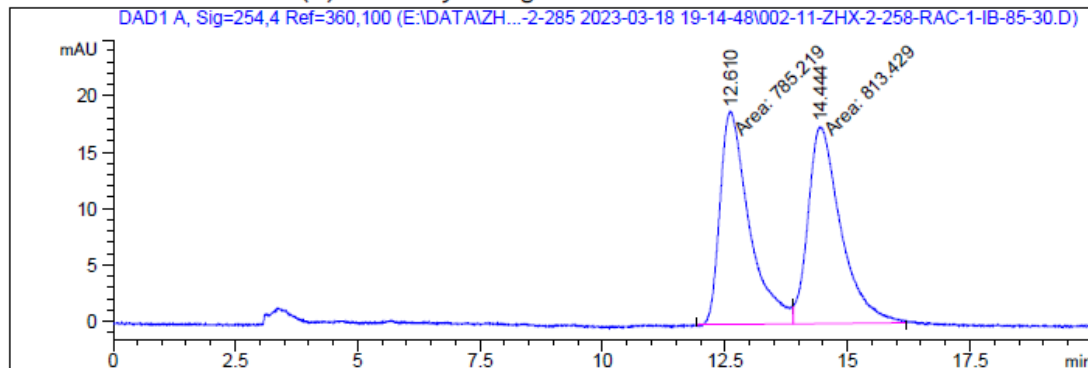

Signal 1: DAD1 A, Sig=254,4 Ref=360,100

| Peak # | RetTime [min] | Type | Width [min] | Area [mAU*s] | Height [mAU] | Area %  |
|--------|---------------|------|-------------|--------------|--------------|---------|
| 1      | 12.610        | MF   | 0.6922      | 785.21936    | 18.90717     | 49.1177 |
| 2      | 14.444        | FM   | 0.7757      | 813.42896    | 17.47756     | 50.8823 |

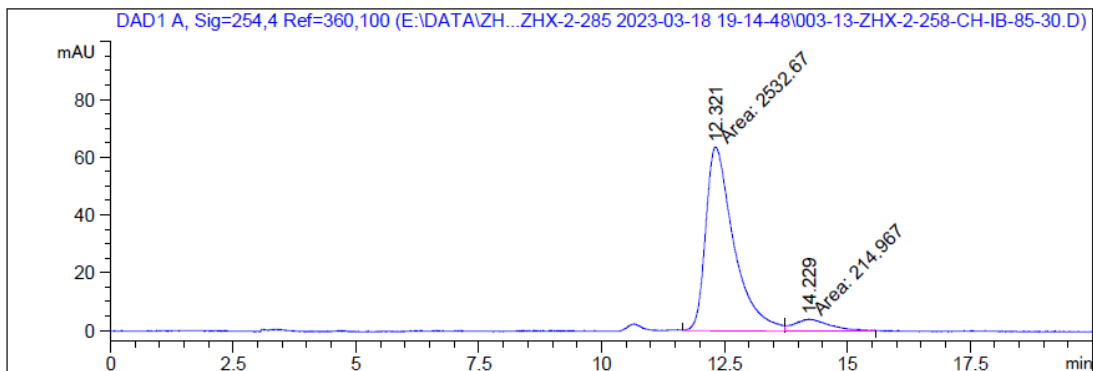

Signal 1: DAD1 A, Sig=254,4 Ref=360,100

| Peak # | RetTime [min] | Type | Width [min] | Area [mAU*s] | Height [mAU] | Area %  |
|--------|---------------|------|-------------|--------------|--------------|---------|
| 1      | 12.321        | MF   | 0.6641      | 2532.67212   | 63.56120     | 92.1763 |
| 2      | 14.229        | FM   | 0.8773      | 214.96744    | 4.08410      | 7.8237  |

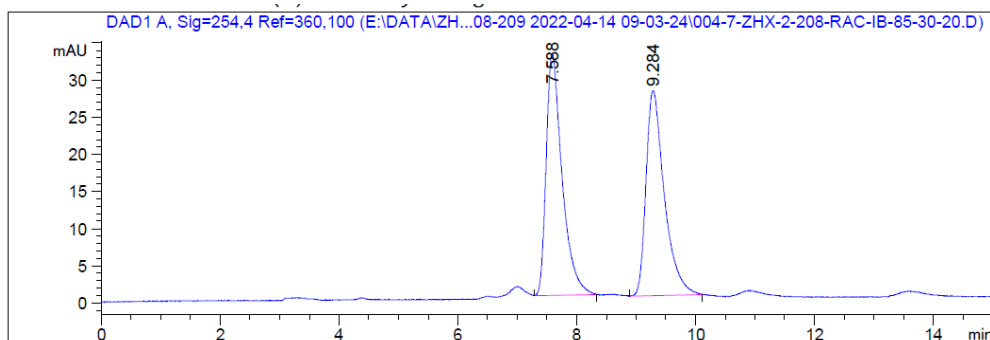

Signal 1: DAD1 A, Sig=254,4 Ref=360,100

| Peak # | RetTime [min] | Type | Width [min] | Area [mAU*s] | Height [mAU] | Area %  |
|--------|---------------|------|-------------|--------------|--------------|---------|
| 1      | 7.588         | BB   | 0.2542      | 603.46094    | 32.48744     | 50.5808 |
| 2      | 9.284         | BB   | 0.2742      | 589.60199    | 27.60595     | 49.4192 |

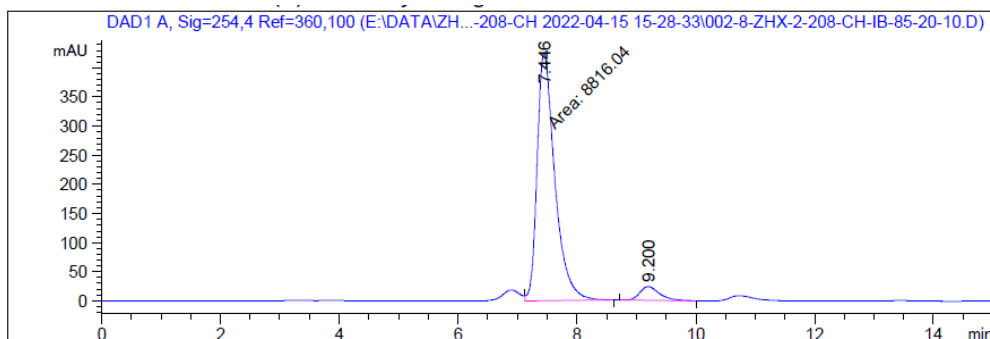

| Peak # | RetTime [min] | Type | Width [min] | Area [mAU*s] | Height [mAU] | Area %  |
|--------|---------------|------|-------------|--------------|--------------|---------|
| 1      | 7.446         | FM   | 0.3463      | 8816.04199   | 424.33841    | 94.1097 |
| 2      | 9.200         | VB R | 0.2745      | 551.79193    | 23.89024     | 5.8903  |

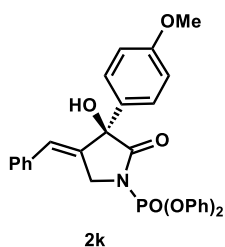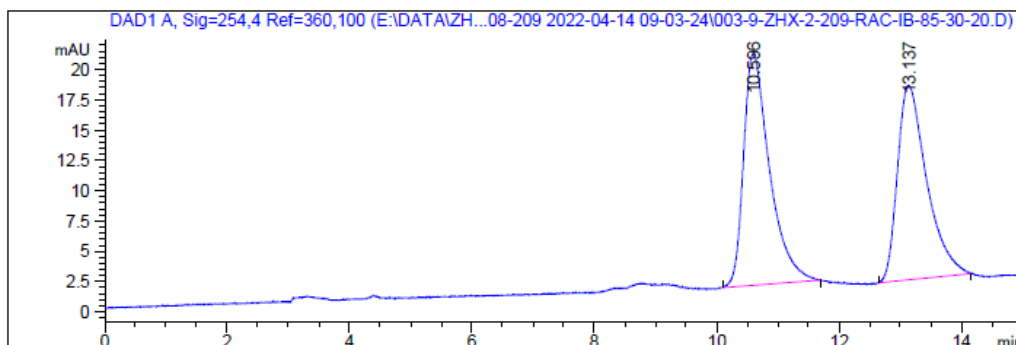

Signal 1: DAD1 A, Sig=254,4 Ref=360,100

| Peak # | RetTime [min] | Type | Width [min] | Area [mAU*s] | Height [mAU] | Area %  |
|--------|---------------|------|-------------|--------------|--------------|---------|
| 1      | 10.596        | BB   | 0.3468      | 565.01715    | 19.14369     | 51.5227 |
| 2      | 13.137        | BB   | 0.3891      | 531.61926    | 16.08514     | 48.4773 |

Additional Info : Peak(s) manually integrated

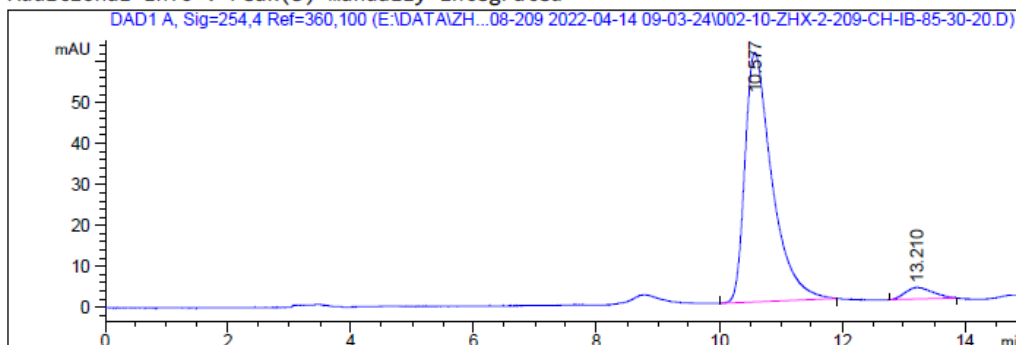

Signal 1: DAD1 A, Sig=254,4 Ref=360,100

| Peak # | RetTime [min] | Type | Width [min] | Area [mAU*s] | Height [mAU] | Area %  |
|--------|---------------|------|-------------|--------------|--------------|---------|
| 1      | 10.577        | BB   | 0.3680      | 1862.24414   | 60.85852     | 95.3839 |
| 2      | 13.210        | BB   | 0.3682      | 90.12354     | 2.89102      | 4.6161  |

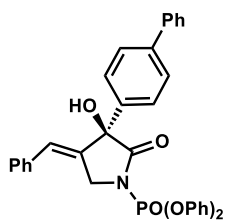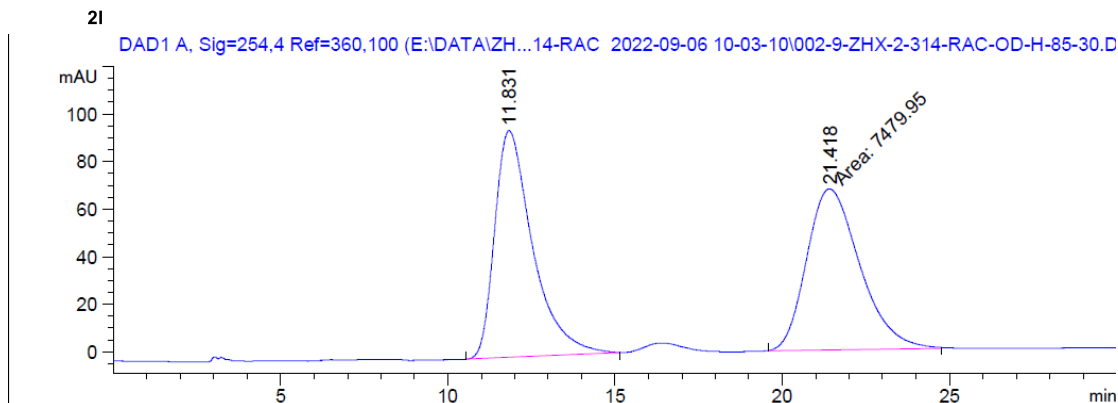

Signal 1: DAD1 A, Sig=254,4 Ref=360,100

| Peak # | RetTime [min] | Type | Width [min] | Area [mAU*s] | Height [mAU] | Area %  |
|--------|---------------|------|-------------|--------------|--------------|---------|
| 1      | 11.831        | BB   | 0.9276      | 7516.10352   | 95.19493     | 50.1205 |
| 2      | 21.418        | MM   | 1.8414      | 7479.95361   | 67.70033     | 49.8795 |

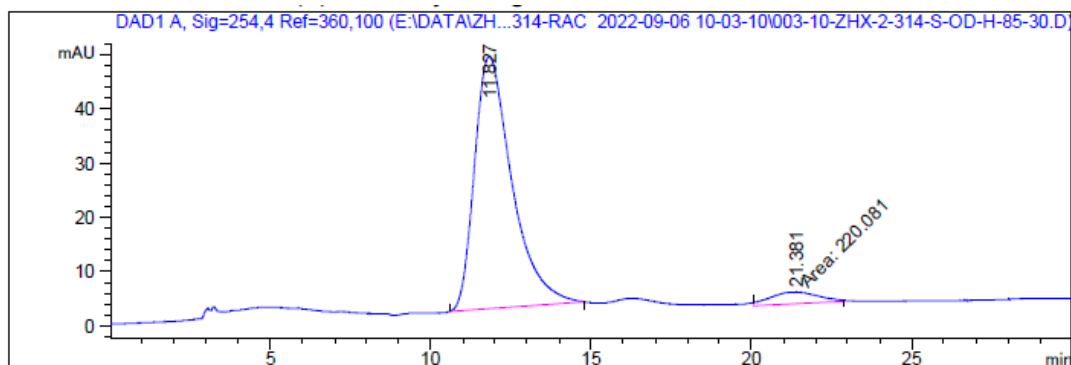

Signal 1: DAD1 A, Sig=254,4 Ref=360,100

| Peak # | RetTime [min] | Type | Width [min] | Area [mAU*s] | Height [mAU] | Area %  |
|--------|---------------|------|-------------|--------------|--------------|---------|
| 1      | 11.827        | BB   | 0.9524      | 3774.10425   | 46.49958     | 94.4900 |
| 2      | 21.381        | MM   | 1.7247      | 220.08112    | 2.12675      | 5.5100  |

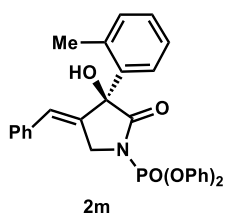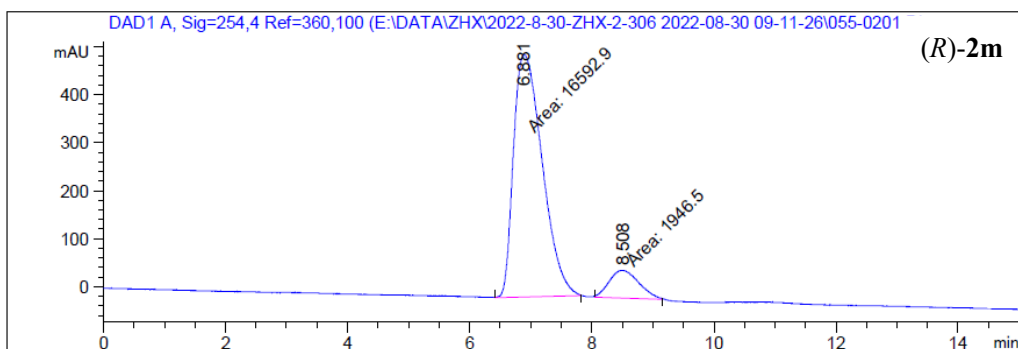

Signal 1: DAD1 A, Sig=254,4 Ref=360,100

| Peak # | RetTime [min] | Type | Width [min] | Area [mAU*s] | Height [mAU] | Area %  |
|--------|---------------|------|-------------|--------------|--------------|---------|
| 1      | 6.881         | MM   | 0.5474      | 1.65929e4    | 505.20212    | 89.5007 |
| 2      | 8.508         | MM   | 0.5614      | 1946.50195   | 57.78852     | 10.4993 |

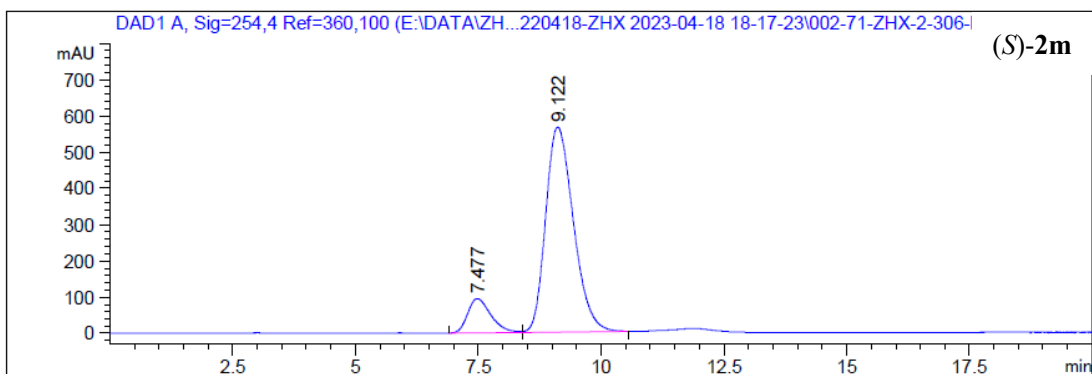

Signal 1: DAD1 A, Sig=254,4 Ref=360,100

| Peak # | RetTime [min] | Type | Width [min] | Area [mAU*s] | Height [mAU] | Area %  |
|--------|---------------|------|-------------|--------------|--------------|---------|
| 1      | 7.477         | VV R | 0.3835      | 3088.53711   | 94.57771     | 12.1936 |
| 2      | 9.122         | VV R | 0.4615      | 2.22406e4    | 565.91272    | 87.8064 |

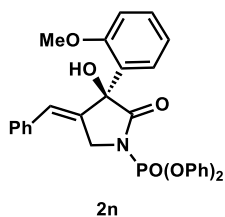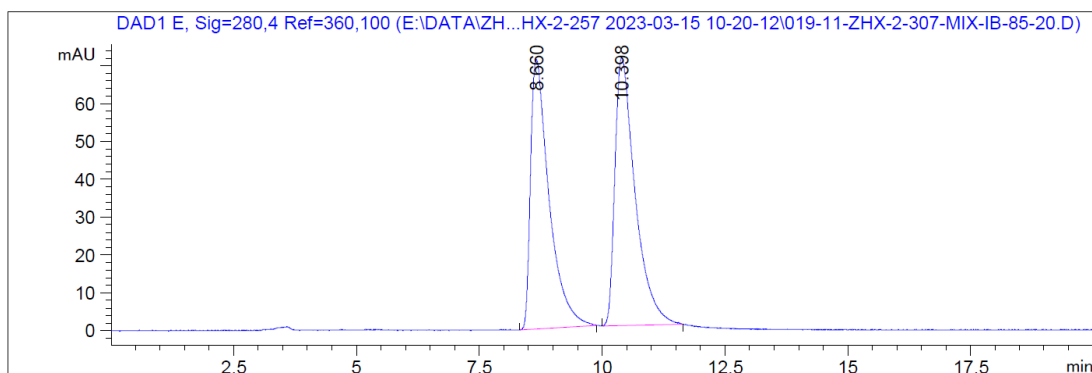

Signal 1: DAD1 E, Sig=280,4 Ref=360,100

| Peak # | RetTime [min] | Type | Width [min] | Area [mAU*s] | Height [mAU] | Area %  |
|--------|---------------|------|-------------|--------------|--------------|---------|
| 1      | 8.660         | BV R | 0.3145      | 1877.95691   | 71.24891     | 48.0755 |
| 2      | 10.398        | BV R | 0.3400      | 2028.30872   | 70.75235     | 51.9245 |

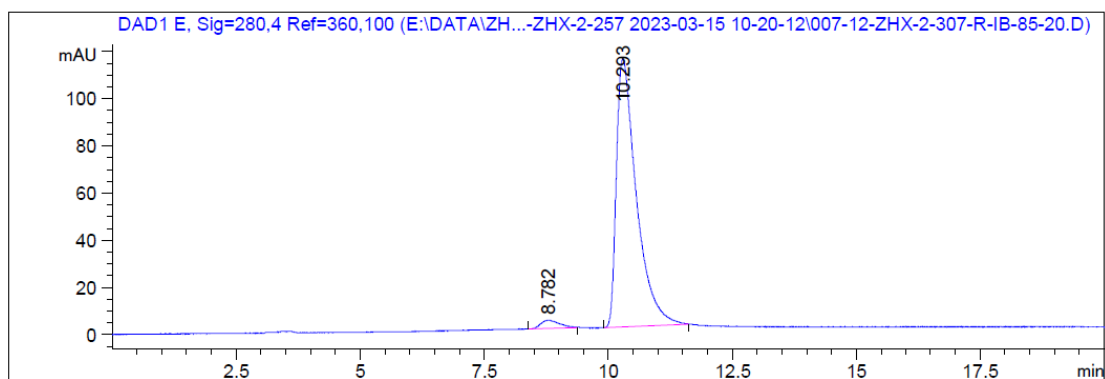

Signal 1: DAD1 E, Sig=280,4 Ref=360,100

| Peak # | RetTime [min] | Type | Width [min] | Area [mAU*s] | Height [mAU] | Area %  |
|--------|---------------|------|-------------|--------------|--------------|---------|
| 1      | 8.782         | BV R | 0.3040      | 90.65819     | 3.51372      | 2.7694  |
| 2      | 10.293        | BV R | 0.3401      | 3182.91821   | 113.53058    | 97.2306 |

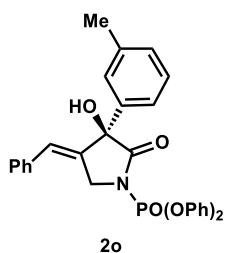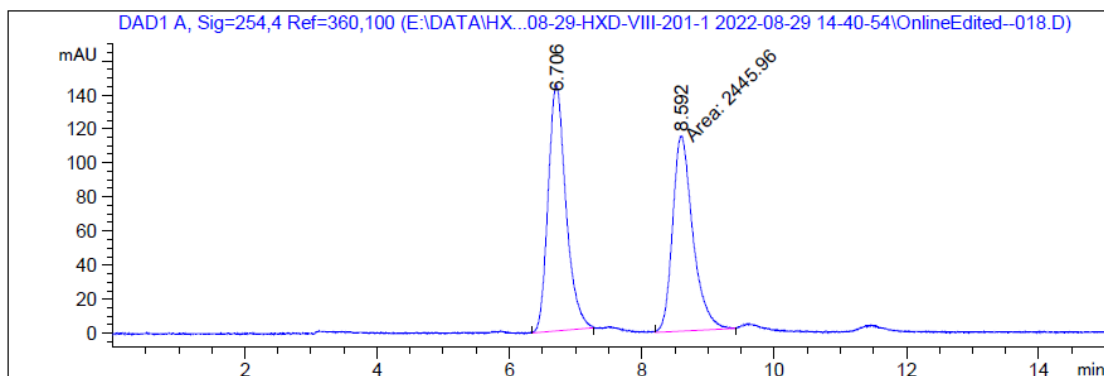

Signal 1: DAD1 A, Sig=254,4 Ref=360,100

| Peak # | RetTime [min] | Type | Width [min] | Area [mAU*s] | Height [mAU] | Area %  |
|--------|---------------|------|-------------|--------------|--------------|---------|
| 1      | 6.706         | VV R | 0.2235      | 2711.19629   | 144.45935    | 52.5715 |
| 2      | 8.592         | MM   | 0.3555      | 2445.96118   | 114.66341    | 47.4285 |

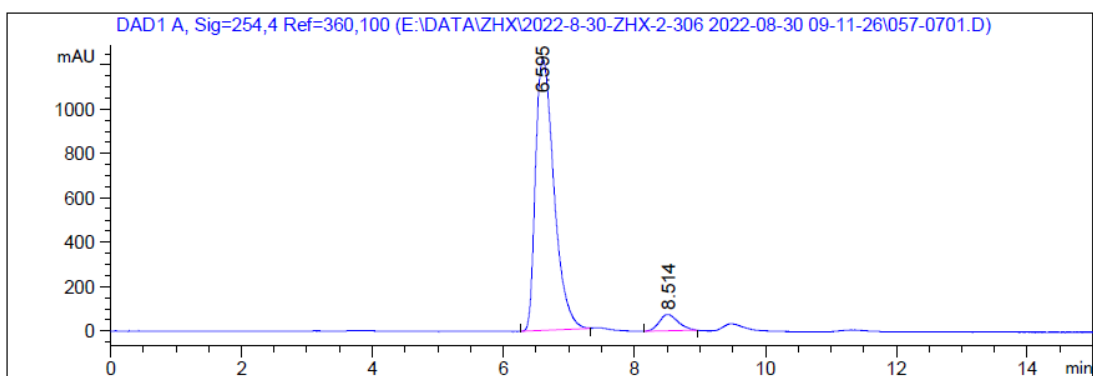

Signal 1: DAD1 A, Sig=254,4 Ref=360,100

| Peak # | RetTime [min] | Type | Width [min] | Area [mAU*s] | Height [mAU] | Area %  |
|--------|---------------|------|-------------|--------------|--------------|---------|
| 1      | 6.595         | VV R | 0.2317      | 2.40421e4    | 1223.74805   | 94.2014 |
| 2      | 8.514         | VV R | 0.2371      | 1479.91357   | 73.74467     | 5.7986  |



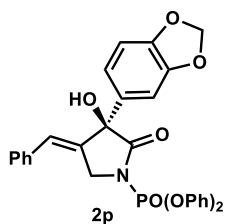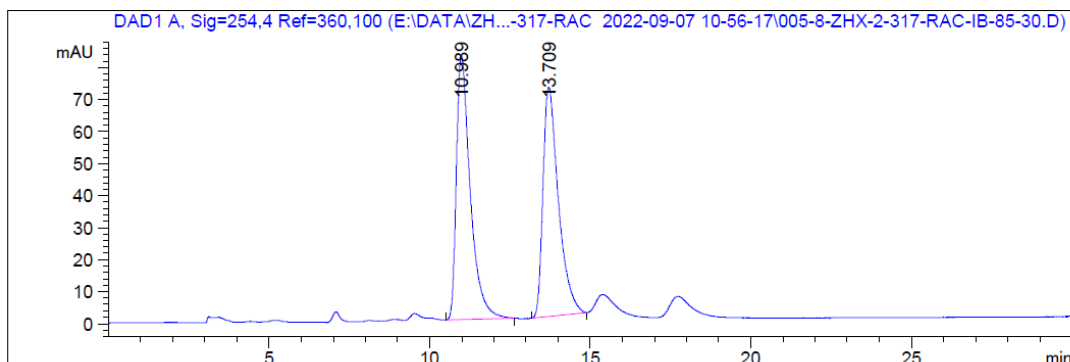

Signal 1: DAD1 A, Sig=254,4 Ref=360,100

| Peak # | RetTime [min] | Type | Width [min] | Area [mAU*s] | Height [mAU] | Area %  |
|--------|---------------|------|-------------|--------------|--------------|---------|
| 1      | 10.989        | BB   | 0.4296      | 2483.10938   | 82.61861     | 50.9151 |
| 2      | 13.709        | BB   | 0.4527      | 2393.85400   | 71.67513     | 49.0849 |

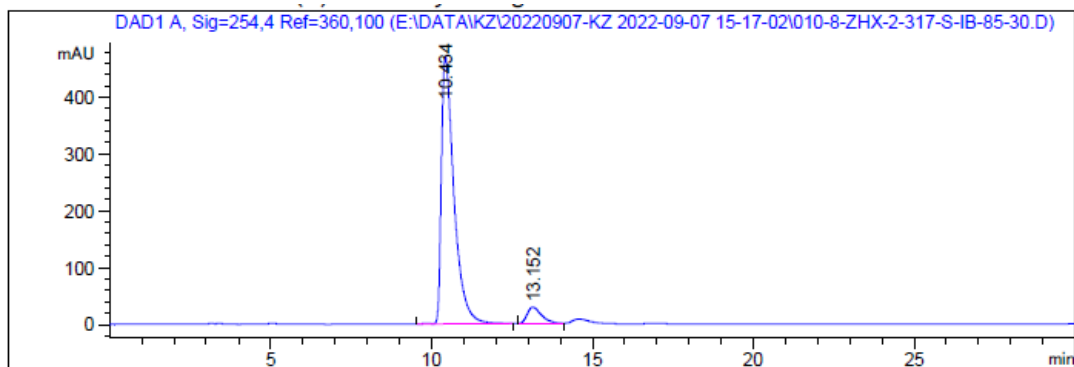

Signal 1: DAD1 A, Sig=254,4 Ref=360,100

| Peak # | RetTime [min] | Type | Width [min] | Area [mAU*s] | Height [mAU] | Area %  |
|--------|---------------|------|-------------|--------------|--------------|---------|
| 1      | 10.434        | VB R | 0.3973      | 1.27867e4    | 470.80933    | 93.4929 |
| 2      | 13.152        | BB   | 0.3808      | 889.95807    | 28.93553     | 6.5071  |

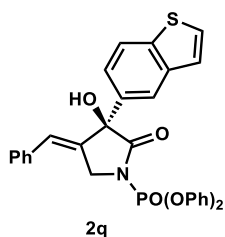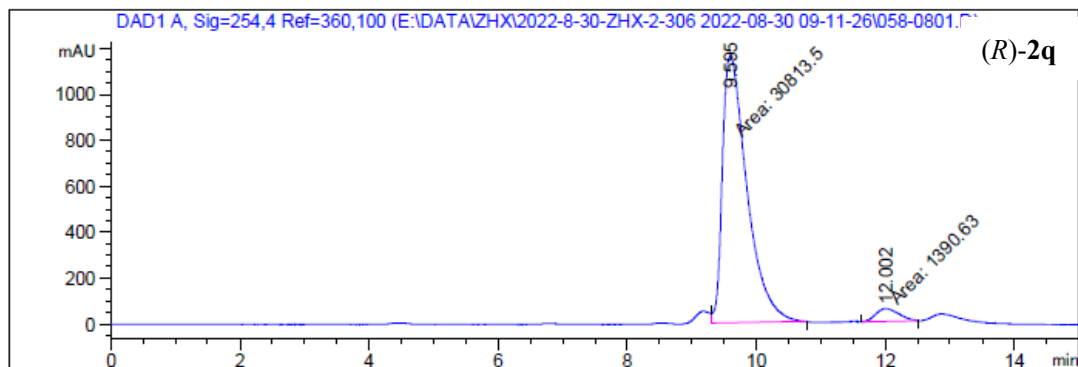

Signal 1: DAD1 A, Sig=254,4 Ref=360,100

| Peak # | RetTime [min] | Type | Width [min] | Area [mAU*s] | Height [mAU] | Area %  |
|--------|---------------|------|-------------|--------------|--------------|---------|
| 1      | 9.595         | FM   | 0.4405      | 3.08135e4    | 1165.90186   | 95.6818 |
| 2      | 12.002        | MM   | 0.4116      | 1390.62781   | 56.31136     | 4.3182  |

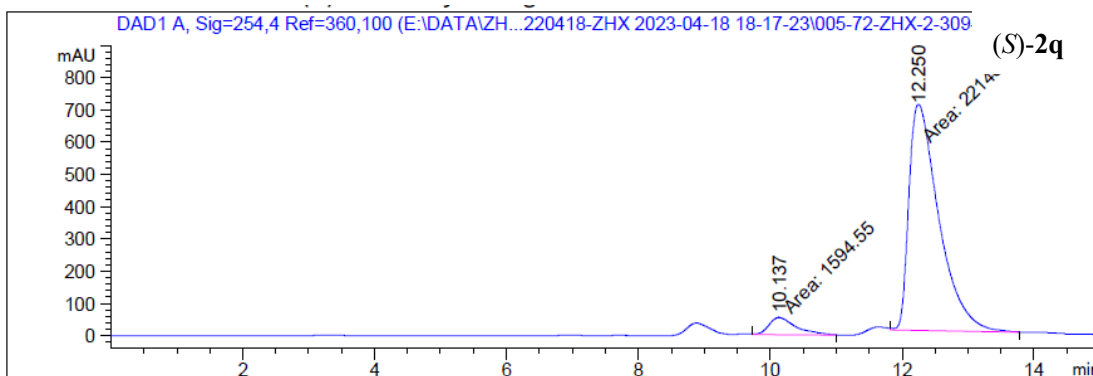

Signal 1: DAD1 A, Sig=254,4 Ref=360,100

| Peak # | RetTime [min] | Type | Width [min] | Area [mAU*s] | Height [mAU] | Area %  |
|--------|---------------|------|-------------|--------------|--------------|---------|
| 1      | 10.137        | MM   | 0.4914      | 1594.55457   | 54.08352     | 6.7159  |
| 2      | 12.250        | MM   | 0.5262      | 2.21484e4    | 701.45410    | 93.2841 |

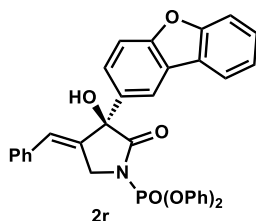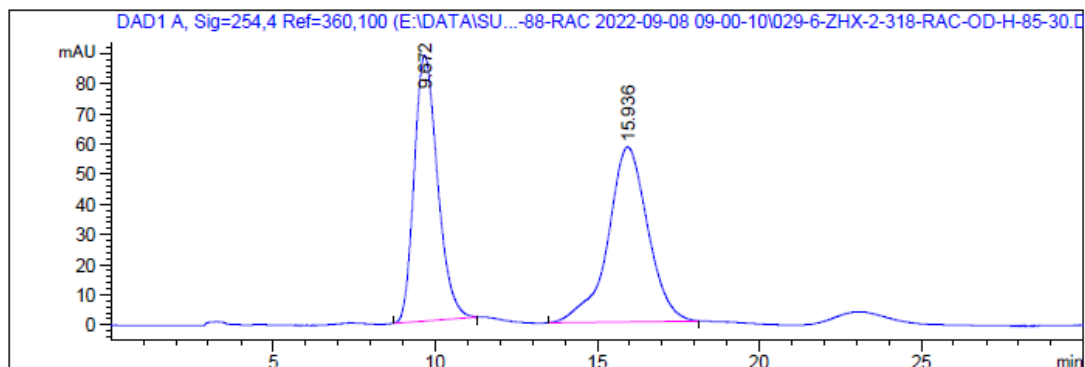

Signal 1: DAD1 A, Sig=254,4 Ref=360,100

| Peak # | RetTime [min] | Type | Width [min] | Area [mAU*s] | Height [mAU] | Area %  |
|--------|---------------|------|-------------|--------------|--------------|---------|
| 1      | 9.672         | BB   | 0.6001      | 4406.70410   | 87.94814     | 47.0429 |
| 2      | 15.936        | BB   | 1.0022      | 4960.70605   | 57.95118     | 52.9571 |

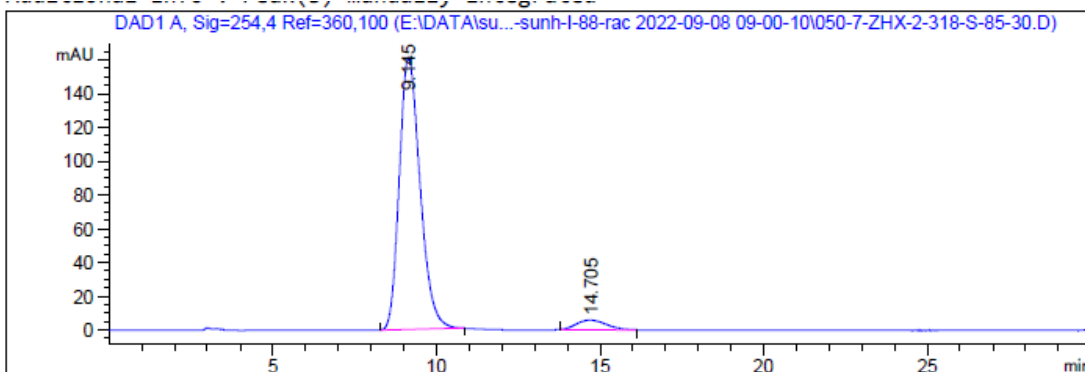

Signal 1: DAD1 A, Sig=254,4 Ref=360,100

| Peak # | RetTime [min] | Type | Width [min] | Area [mAU*s] | Height [mAU] | Area %  |
|--------|---------------|------|-------------|--------------|--------------|---------|
| 1      | 9.145         | BB   | 0.6338      | 7111.06543   | 160.83282    | 95.1745 |
| 2      | 14.705        | BB   | 0.7350      | 360.54550    | 5.74233      | 4.8255  |

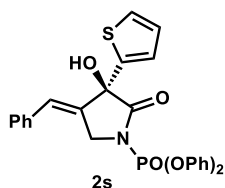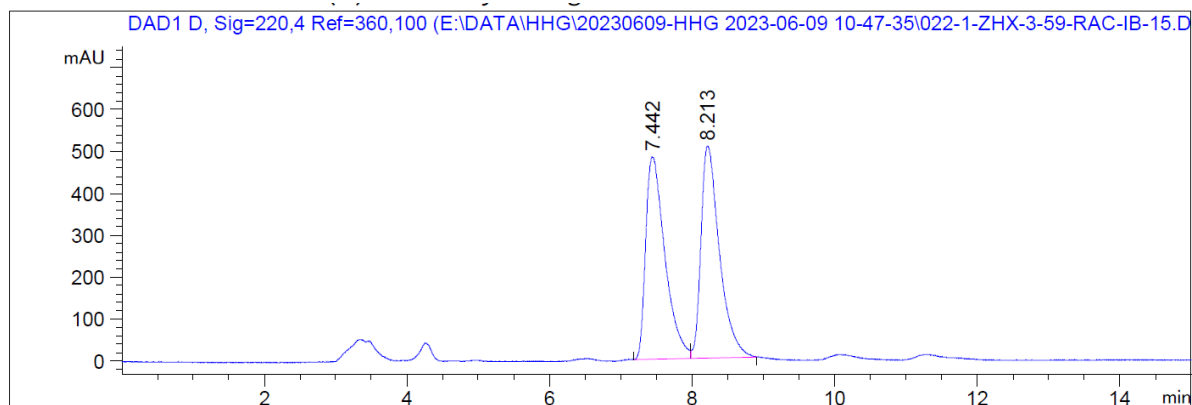

Signal 1: DAD1 D, Sig=220,4 Ref=360,100

| Peak # | RetTime [min] | Type | Width [min] | Area [mAU*s] | Height [mAU] | Area %  |
|--------|---------------|------|-------------|--------------|--------------|---------|
| 1      | 7.442         | VV R | 0.2248      | 9075.09961   | 482.80521    | 49.8252 |
| 2      | 8.213         | VV R | 0.2172      | 9138.77539   | 505.98129    | 50.1748 |

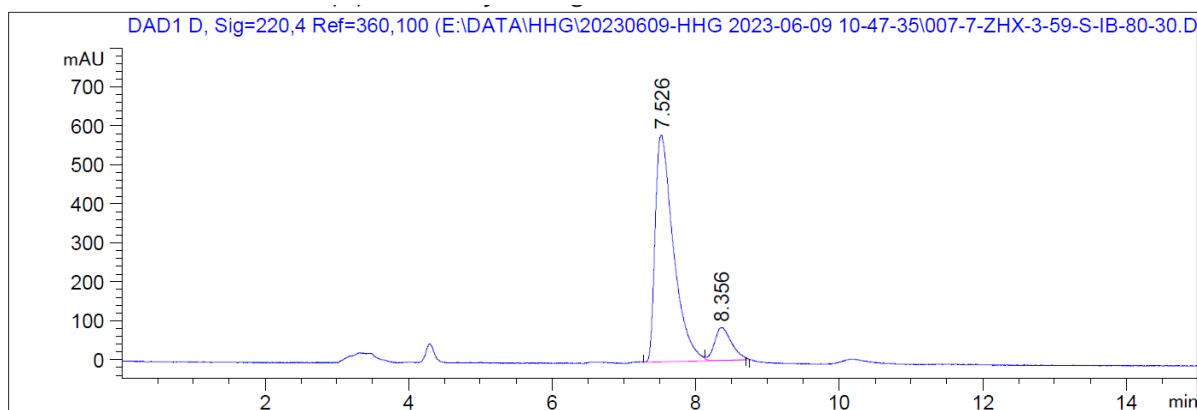

Signal 1: DAD1 D, Sig=220,4 Ref=360,100

| Peak # | RetTime [min] | Type | Width [min] | Area [mAU*s] | Height [mAU] | Area %  |
|--------|---------------|------|-------------|--------------|--------------|---------|
| 1      | 7.526         | BV R | 0.2103      | 1.02888e4    | 582.96527    | 88.2516 |
| 2      | 8.356         | VV E | 0.1935      | 1369.68396   | 84.10990     | 11.7484 |

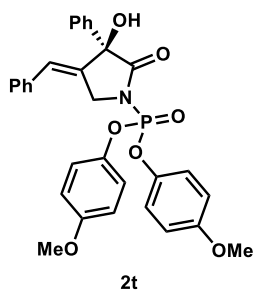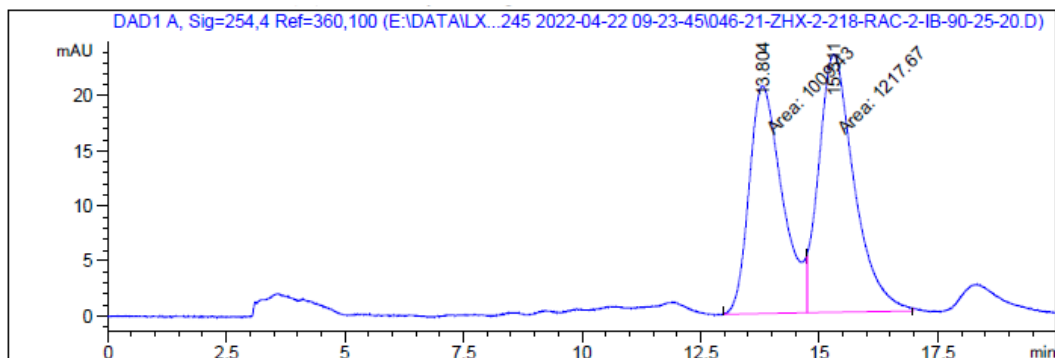

Signal 1: DAD1 A, Sig=254,4 Ref=360,100

| Peak # | RetTime [min] | Type | Width [min] | Area [mAU*s] | Height [mAU] | Area %  |
|--------|---------------|------|-------------|--------------|--------------|---------|
| 1      | 13.804        | MF   | 0.8135      | 1009.43231   | 20.68173     | 45.3249 |
| 2      | 15.311        | FM   | 0.8665      | 1217.66870   | 23.42100     | 54.6751 |

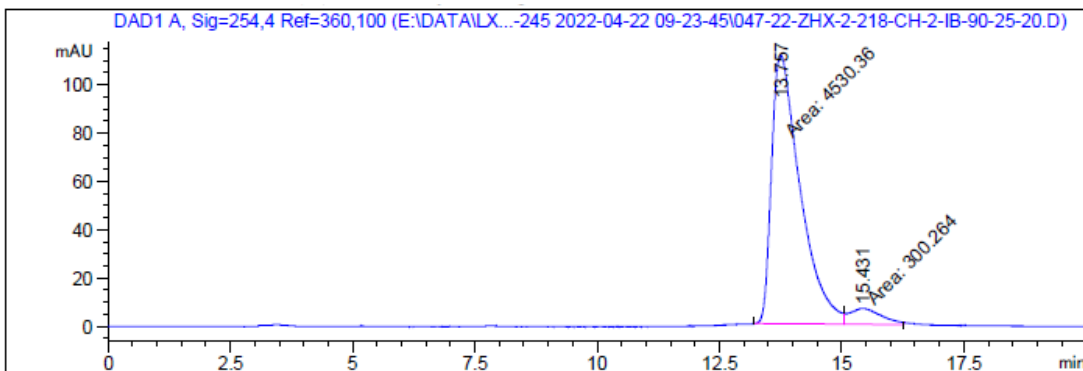

Signal 1: DAD1 A, Sig=254,4 Ref=360,100

| Peak # | RetTime [min] | Type | Width [min] | Area [mAU*s] | Height [mAU] | Area %  |
|--------|---------------|------|-------------|--------------|--------------|---------|
| 1      | 13.757        | MF   | 0.6789      | 4530.35889   | 111.21449    | 93.7842 |
| 2      | 15.431        | FM   | 0.7685      | 300.26407    | 6.51173      | 6.2158  |

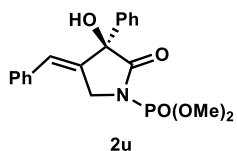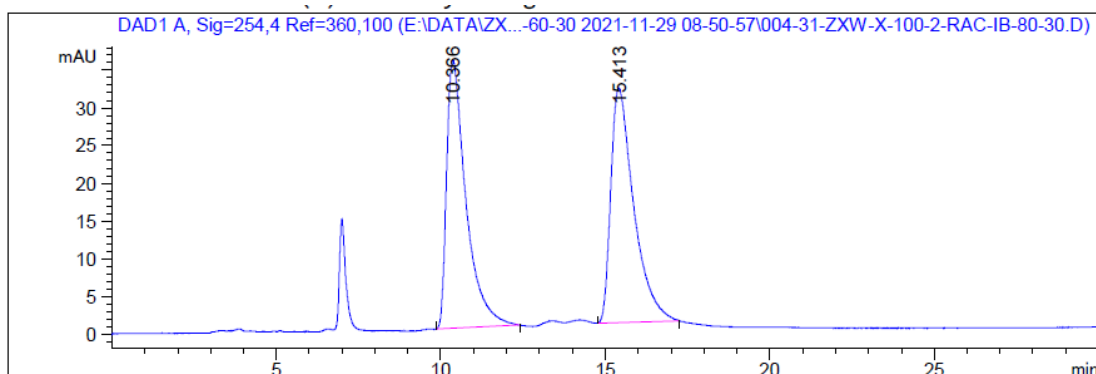

Signal 1: DAD1 A, Sig=254,4 Ref=360,100

| Peak # | RetTime [min] | Type | Width [min] | Area [mAU*s] | Height [mAU] | Area %  |
|--------|---------------|------|-------------|--------------|--------------|---------|
| 1      | 10.366        | BB   | 0.5229      | 1458.55713   | 35.57013     | 49.1428 |
| 2      | 15.413        | BB   | 0.5692      | 1509.44324   | 31.07320     | 50.8572 |

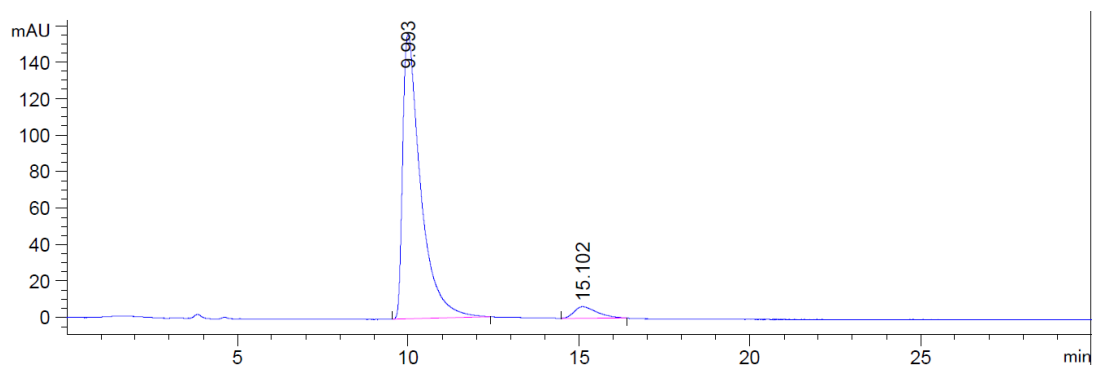

Signal 1: DAD1 A, Sig=254,4 Ref=360,100

| Peak # | RetTime [min] | Type | Width [min] | Area [mAU*s] | Height [mAU] | Area %  |
|--------|---------------|------|-------------|--------------|--------------|---------|
| 1      | 9.993         | BB   | 0.5192      | 5689.43896   | 155.92778    | 95.0575 |
| 2      | 15.102        | BB   | 0.5505      | 295.81943    | 6.29795      | 4.9425  |

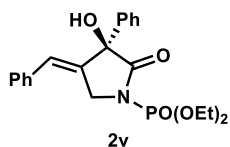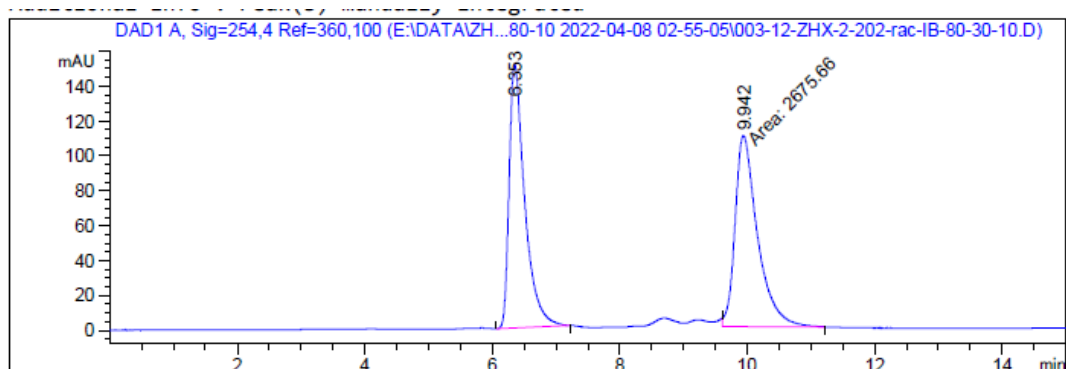

Signal 1: DAD1 A, Sig=254,4 Ref=360,100

| Peak # | RetTime [min] | Type | Width [min] | Area [mAU*s] | Height [mAU] | Area %  |
|--------|---------------|------|-------------|--------------|--------------|---------|
| 1      | 6.353         | BB   | 0.2482      | 2558.74438   | 151.01503    | 48.8832 |
| 2      | 9.942         | FM   | 0.4075      | 2675.66162   | 109.42923    | 51.1168 |

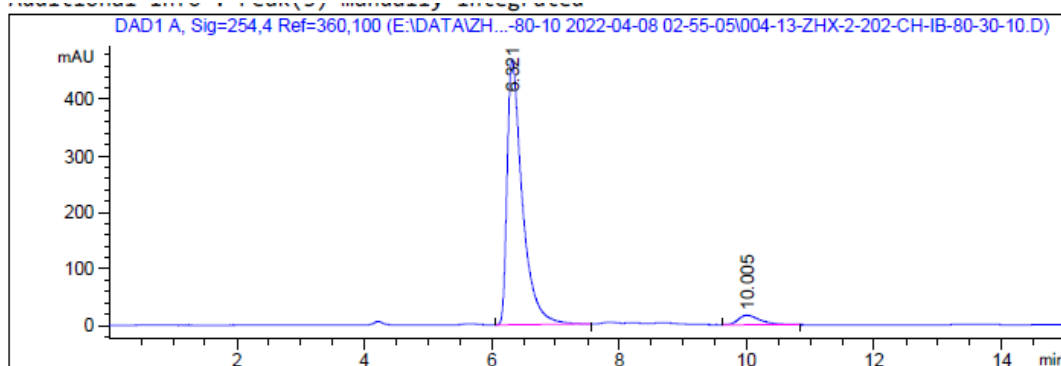

| Peak # | RetTime [min] | Type | Width [min] | Area [mAU*s] | Height [mAU] | Area %  |
|--------|---------------|------|-------------|--------------|--------------|---------|
| 1      | 6.321         | BB   | 0.2433      | 7772.64551   | 469.12244    | 95.0444 |
| 2      | 10.005        | BB   | 0.2842      | 405.26199    | 16.84375     | 4.9556  |

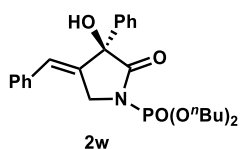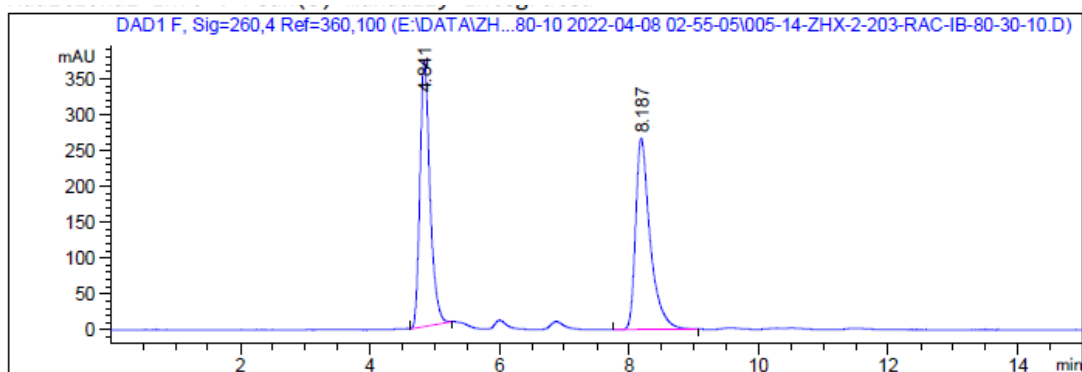

Signal 1: DAD1 F, Sig=260,4 Ref=360,100

| Peak # | RetTime [min] | Type | Width [min] | Area [mAU*s] | Height [mAU] | Area %  |
|--------|---------------|------|-------------|--------------|--------------|---------|
| 1      | 4.841         | BB   | 0.1633      | 3992.69263   | 371.82065    | 49.0168 |
| 2      | 8.187         | VB R | 0.2296      | 4152.86865   | 266.75391    | 50.9832 |

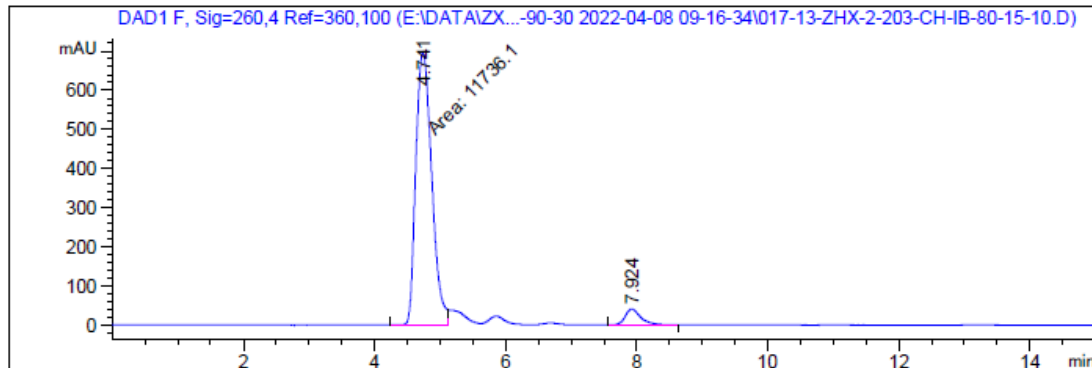

Signal 1: DAD1 F, Sig=260,4 Ref=360,100

| Peak # | RetTime [min] | Type | Width [min] | Area [mAU*s] | Height [mAU] | Area %  |
|--------|---------------|------|-------------|--------------|--------------|---------|
| 1      | 4.741         | MF   | 0.2804      | 1.17361e4    | 697.62030    | 94.5899 |
| 2      | 7.924         | BB   | 0.2299      | 671.25037    | 40.70617     | 5.4101  |



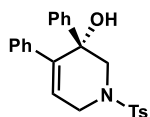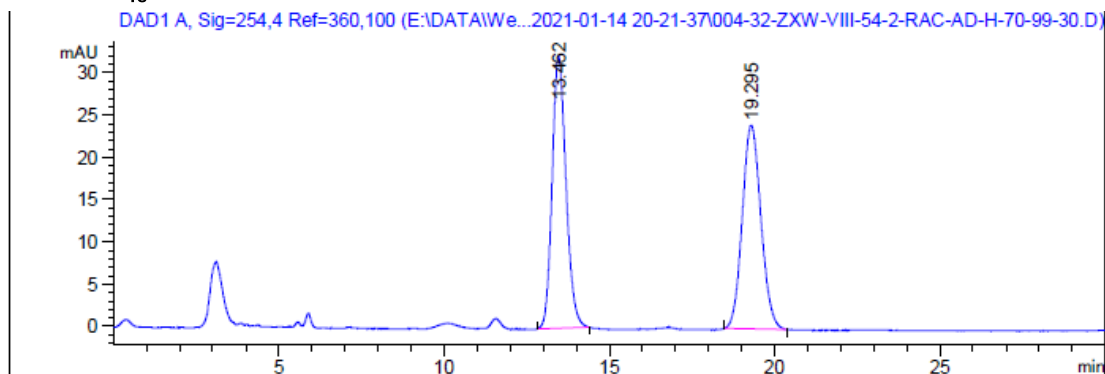

Signal 1: DAD1 A, Sig=254,4 Ref=360,100

| Peak # | RetTime [min] | Type | Width [min] | Area [mAU*s] | Height [mAU] | Area %  |
|--------|---------------|------|-------------|--------------|--------------|---------|
| 1      | 13.462        | BB   | 0.3551      | 938.94525    | 32.25625     | 49.8454 |
| 2      | 19.295        | BB   | 0.4604      | 944.76868    | 24.10011     | 50.1546 |

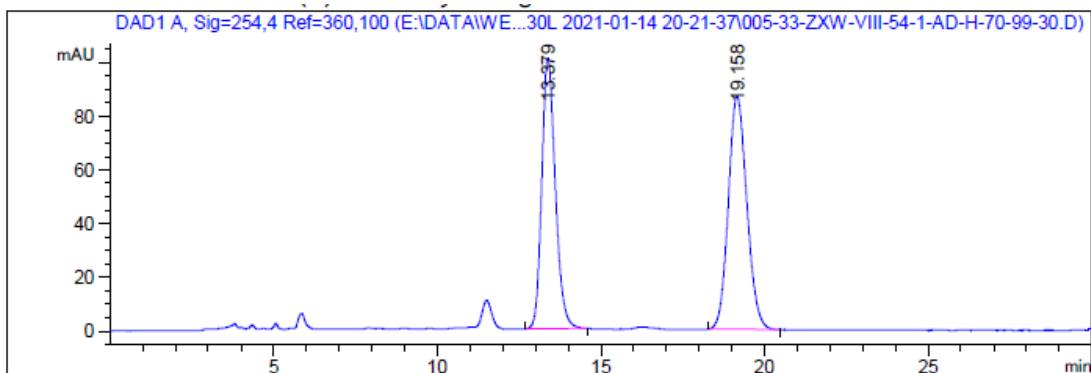

Signal 1: DAD1 A, Sig=254,4 Ref=360,100

| Peak # | RetTime [min] | Type | Width [min] | Area [mAU*s] | Height [mAU] | Area %  |
|--------|---------------|------|-------------|--------------|--------------|---------|
| 1      | 13.379        | BB   | 0.4186      | 2902.73413   | 100.89861    | 45.9885 |
| 2      | 19.158        | BB   | 0.5044      | 3409.12891   | 86.85380     | 54.0115 |

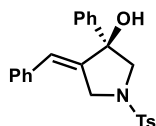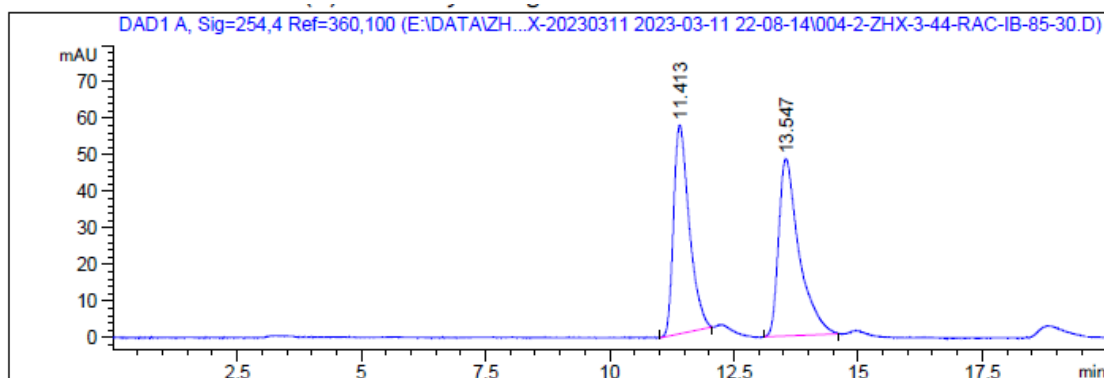

Signal 1: DAD1 A, Sig=254,4 Ref=360,100

| Peak # | RetTime [min] | Type | Width [min] | Area [mAU*s] | Height [mAU] | Area %  |
|--------|---------------|------|-------------|--------------|--------------|---------|
| 1      | 11.413        | VV R | 0.2592      | 1254.55286   | 57.12785     | 47.3720 |
| 2      | 13.547        | VV R | 0.3389      | 1393.74829   | 48.48606     | 52.6280 |

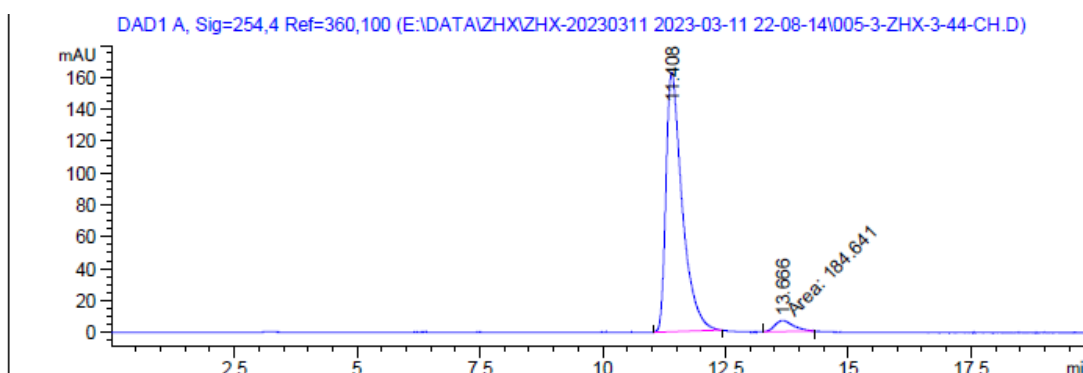

Signal 1: DAD1 A, Sig=254,4 Ref=360,100

| Peak # | RetTime [min] | Type | Width [min] | Area [mAU*s] | Height [mAU] | Area %  |
|--------|---------------|------|-------------|--------------|--------------|---------|
| 1      | 11.408        | BV R | 0.3161      | 3749.28003   | 162.57106    | 95.3064 |
| 2      | 13.666        | MM   | 0.4417      | 184.64084    | 6.96734      | 4.6936  |

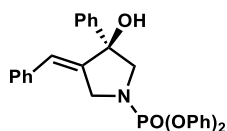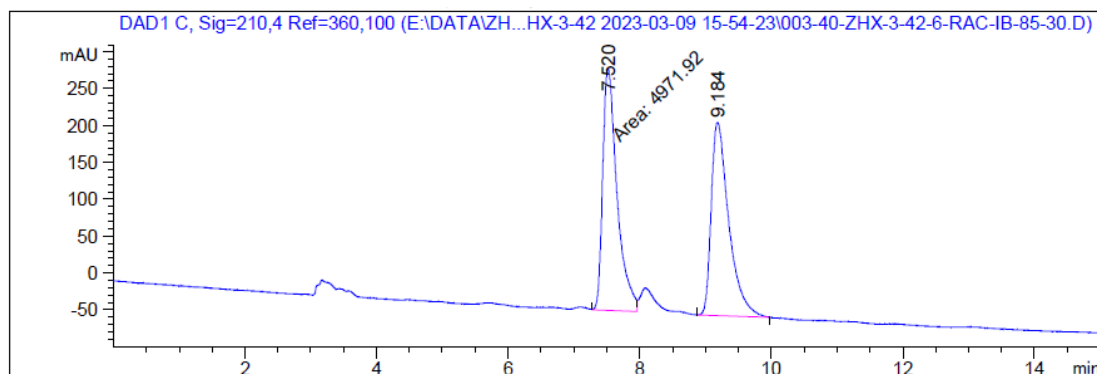

Signal 1: DAD1 C, Sig=210,4 Ref=360,100

| Peak # | RetTime [min] | Type | Width [min] | Area [mAU*s] | Height [mAU] | Area %  |
|--------|---------------|------|-------------|--------------|--------------|---------|
| 1      | 7.520         | MF   | 0.2524      | 4971.91650   | 328.36710    | 50.5474 |
| 2      | 9.184         | VV R | 0.2234      | 4864.22412   | 262.21100    | 49.4526 |

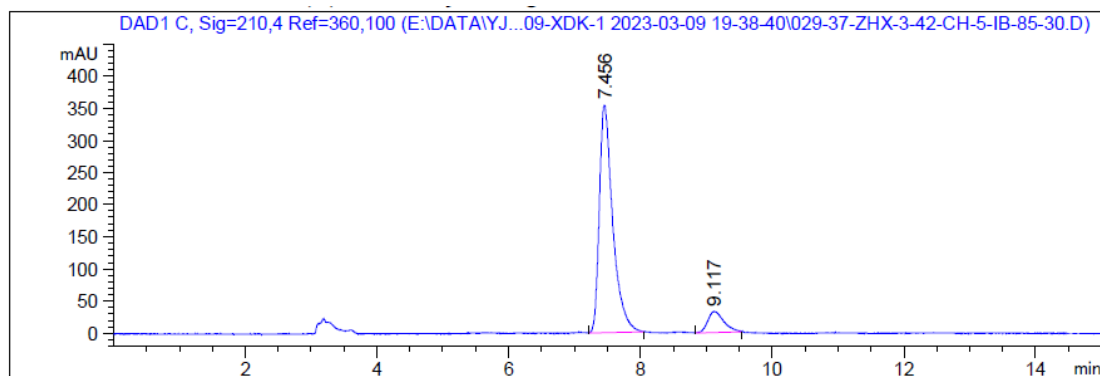

Signal 1: DAD1 C, Sig=210,4 Ref=360,100

| Peak # | RetTime [min] | Type | Width [min] | Area [mAU*s] | Height [mAU] | Area %  |
|--------|---------------|------|-------------|--------------|--------------|---------|
| 1      | 7.456         | VV R | 0.1686      | 5013.73096   | 354.22839    | 90.1594 |
| 2      | 9.117         | VV R | 0.1987      | 547.23175    | 32.87066     | 9.8406  |

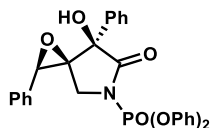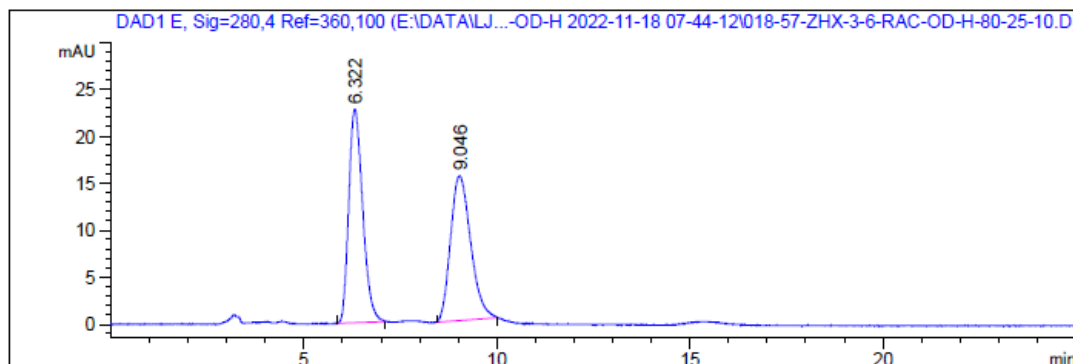

Signal 1: DAD1 E, Sig=280,4 Ref=360,100

| Peak # | RetTime [min] | Type | Width [min] | Area [mAU*s] | Height [mAU] | Area %  |
|--------|---------------|------|-------------|--------------|--------------|---------|
| 1      | 6.322         | BB   | 0.3010      | 568.62793    | 22.67685     | 50.4775 |
| 2      | 9.046         | BB   | 0.4259      | 557.86908    | 15.37144     | 49.5225 |

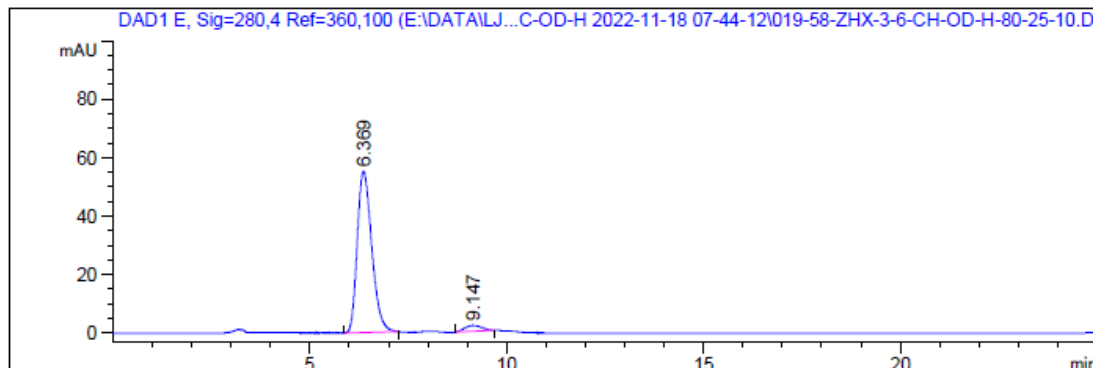

Signal 1: DAD1 E, Sig=280,4 Ref=360,100

| Peak # | RetTime [min] | Type | Width [min] | Area [mAU*s] | Height [mAU] | Area %  |
|--------|---------------|------|-------------|--------------|--------------|---------|
| 1      | 6.369         | BB   | 0.3531      | 1412.99707   | 55.20432     | 95.7163 |
| 2      | 9.147         | BB   | 0.3625      | 63.23706     | 2.05235      | 4.2837  |

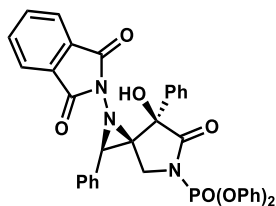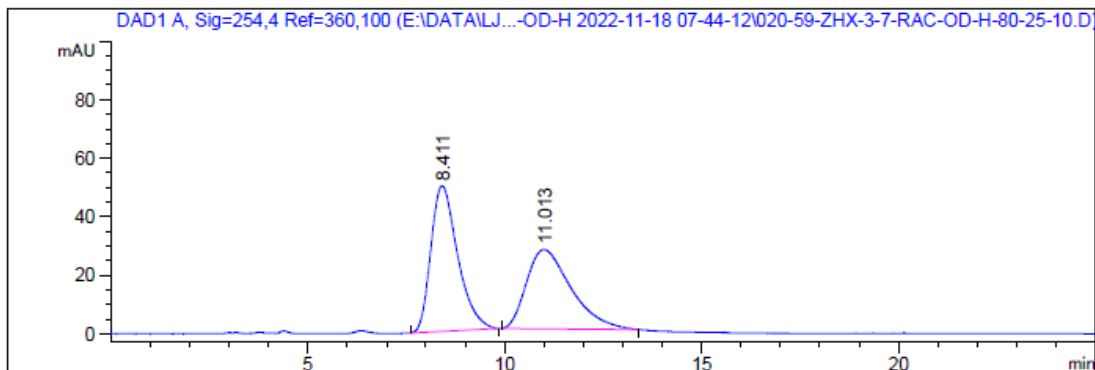

Signal 1: DAD1 A, Sig=254,4 Ref=360,100

| Peak # | RetTime [min] | Type | Width [min] | Area [mAU*s] | Height [mAU] | Area %  |
|--------|---------------|------|-------------|--------------|--------------|---------|
| 1      | 8.411         | BB   | 0.5586      | 2354.98145   | 49.72205     | 52.4672 |
| 2      | 11.013        | BB   | 0.9223      | 2133.50269   | 27.07479     | 47.5328 |

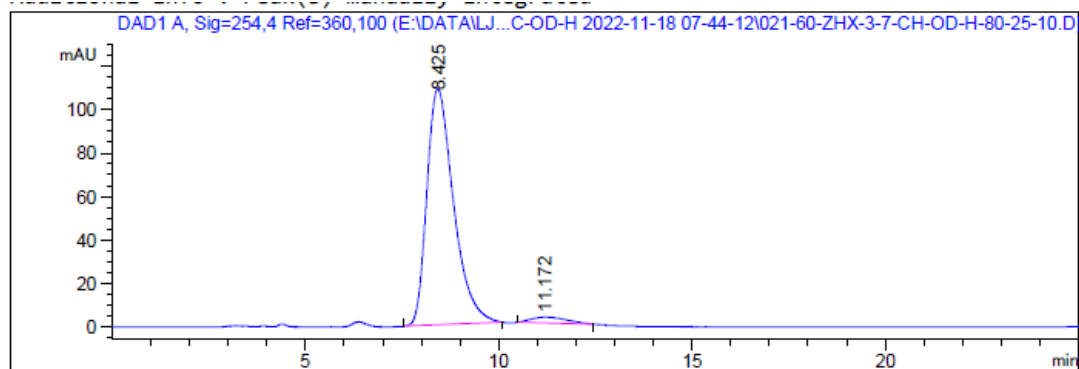

Signal 1: DAD1 A, Sig=254,4 Ref=360,100

| Peak # | RetTime [min] | Type | Width [min] | Area [mAU*s] | Height [mAU] | Area %  |
|--------|---------------|------|-------------|--------------|--------------|---------|
| 1      | 8.425         | BB   | 0.5672      | 5213.52295   | 108.58469    | 96.7646 |
| 2      | 11.172        | BB   | 0.7597      | 174.31798    | 2.68769      | 3.2354  |

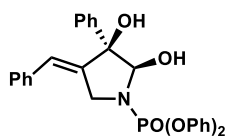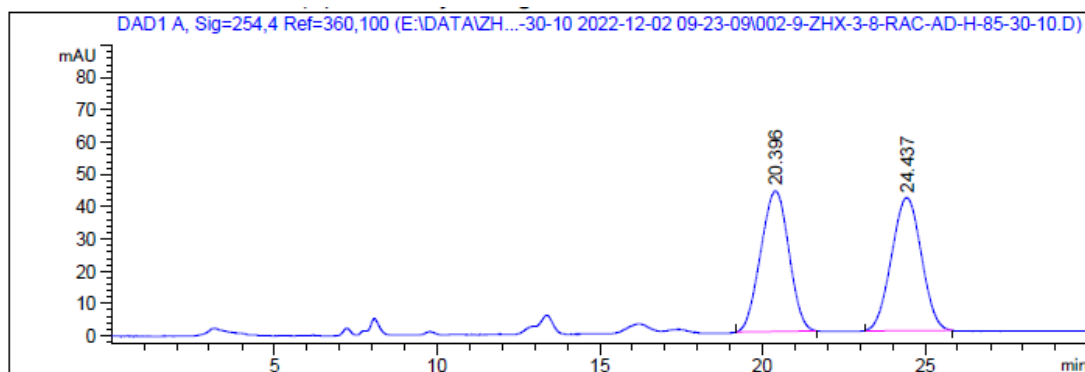

Signal 1: DAD1 A, Sig=254,4 Ref=360,100

| Peak # | RetTime [min] | Type | Width [min] | Area [mAU*s] | Height [mAU] | Area %  |
|--------|---------------|------|-------------|--------------|--------------|---------|
| 1      | 20.396        | BB   | 0.7081      | 2631.04004   | 43.53609     | 50.0574 |
| 2      | 24.437        | BB   | 0.7473      | 2625.00928   | 41.14862     | 49.9426 |

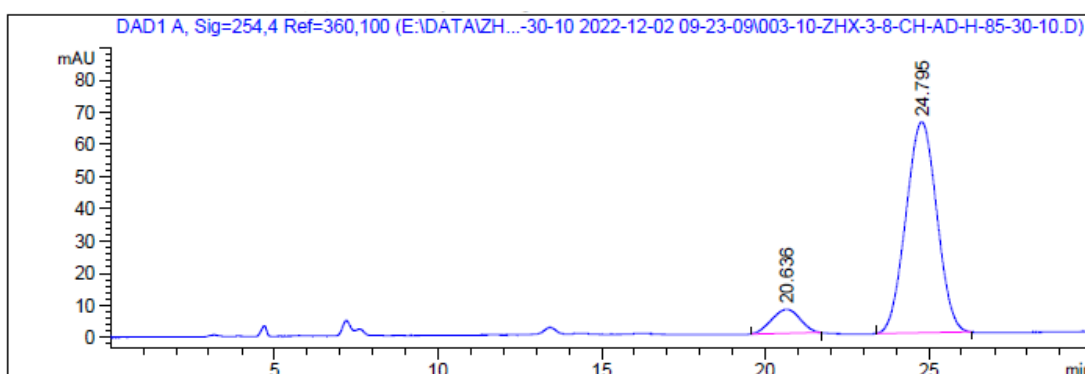

Signal 1: DAD1 A, Sig=254,4 Ref=360,100

| Peak # | RetTime [min] | Type | Width [min] | Area [mAU*s] | Height [mAU] | Area %  |
|--------|---------------|------|-------------|--------------|--------------|---------|
| 1      | 20.636        | BB   | 0.7046      | 450.69247    | 7.49477      | 9.4662  |
| 2      | 24.795        | BB   | 0.7702      | 4310.37695   | 65.54405     | 90.5338 |

## X. NMR Spectra

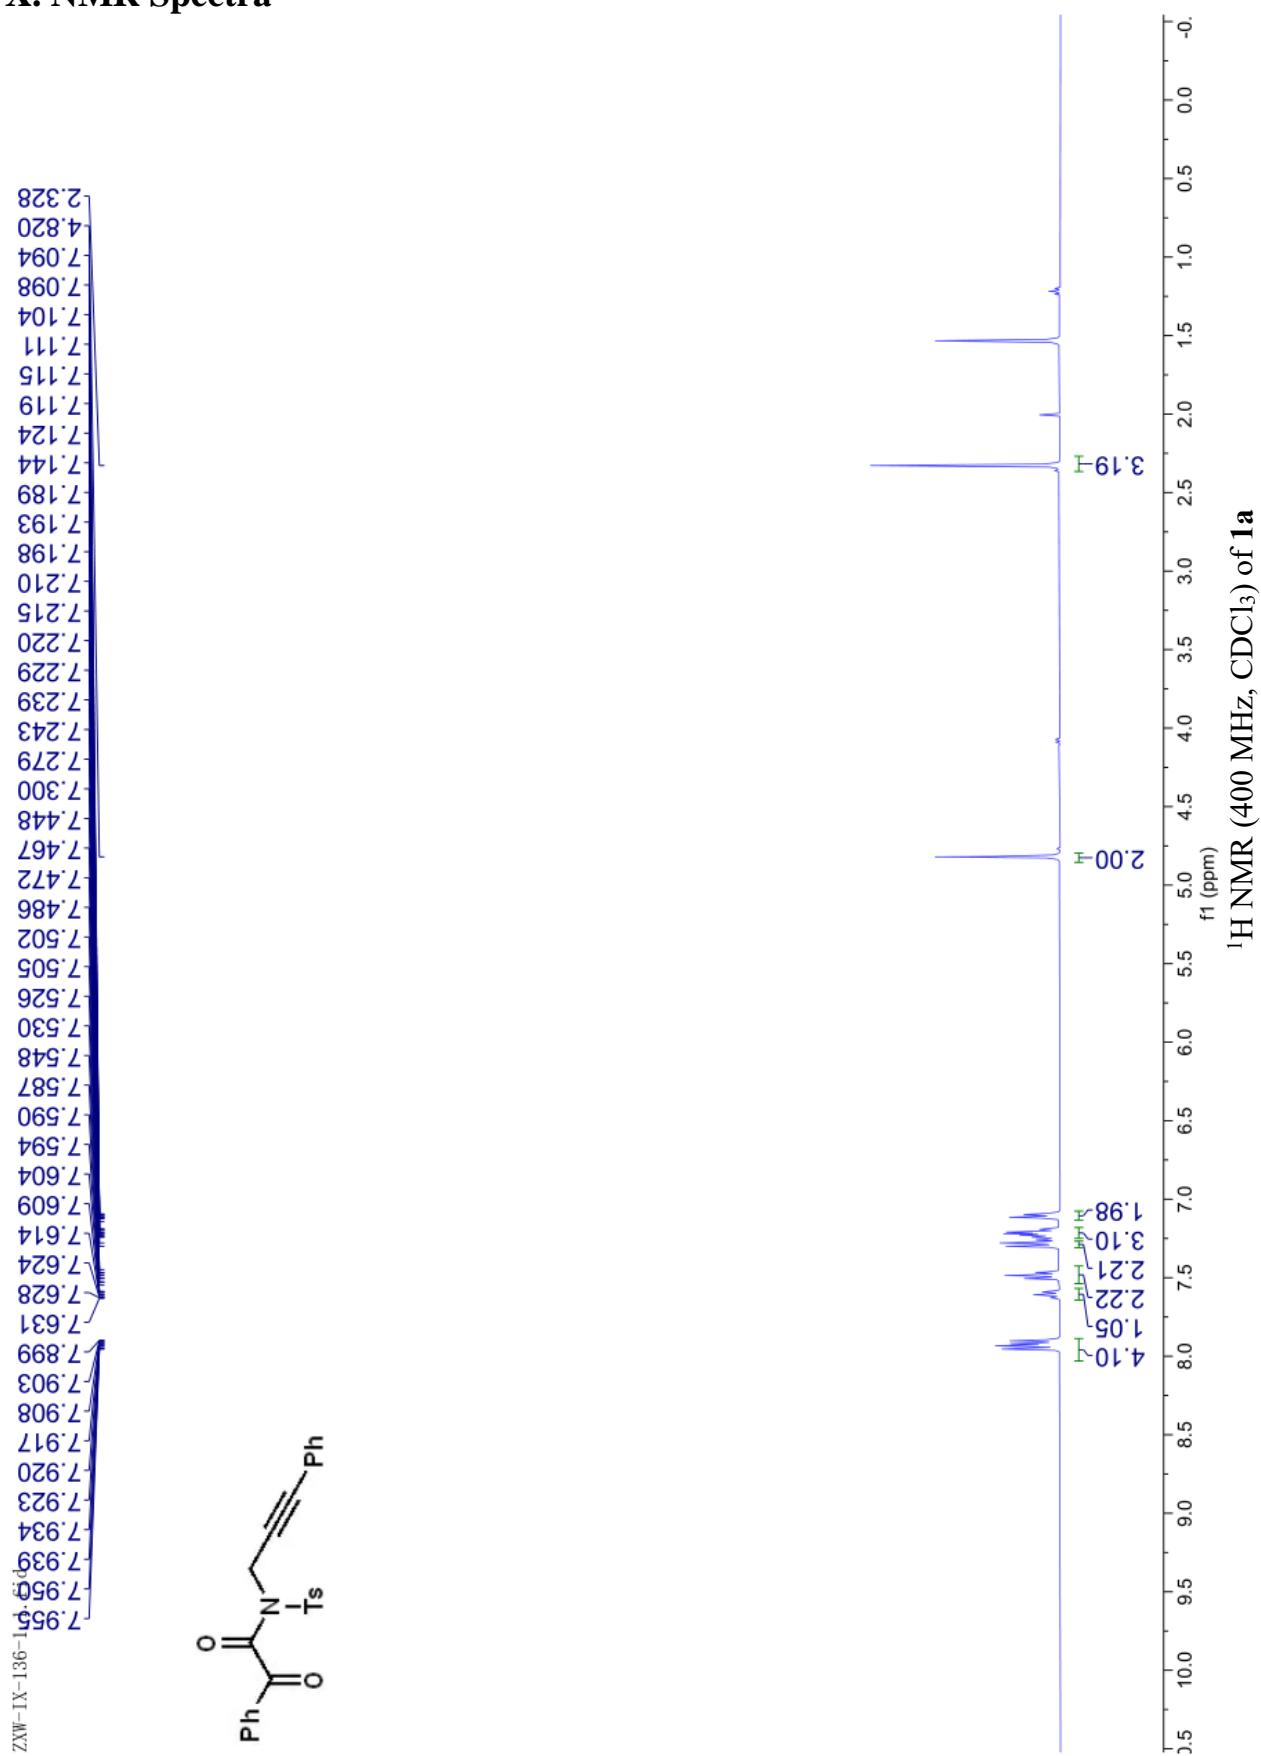

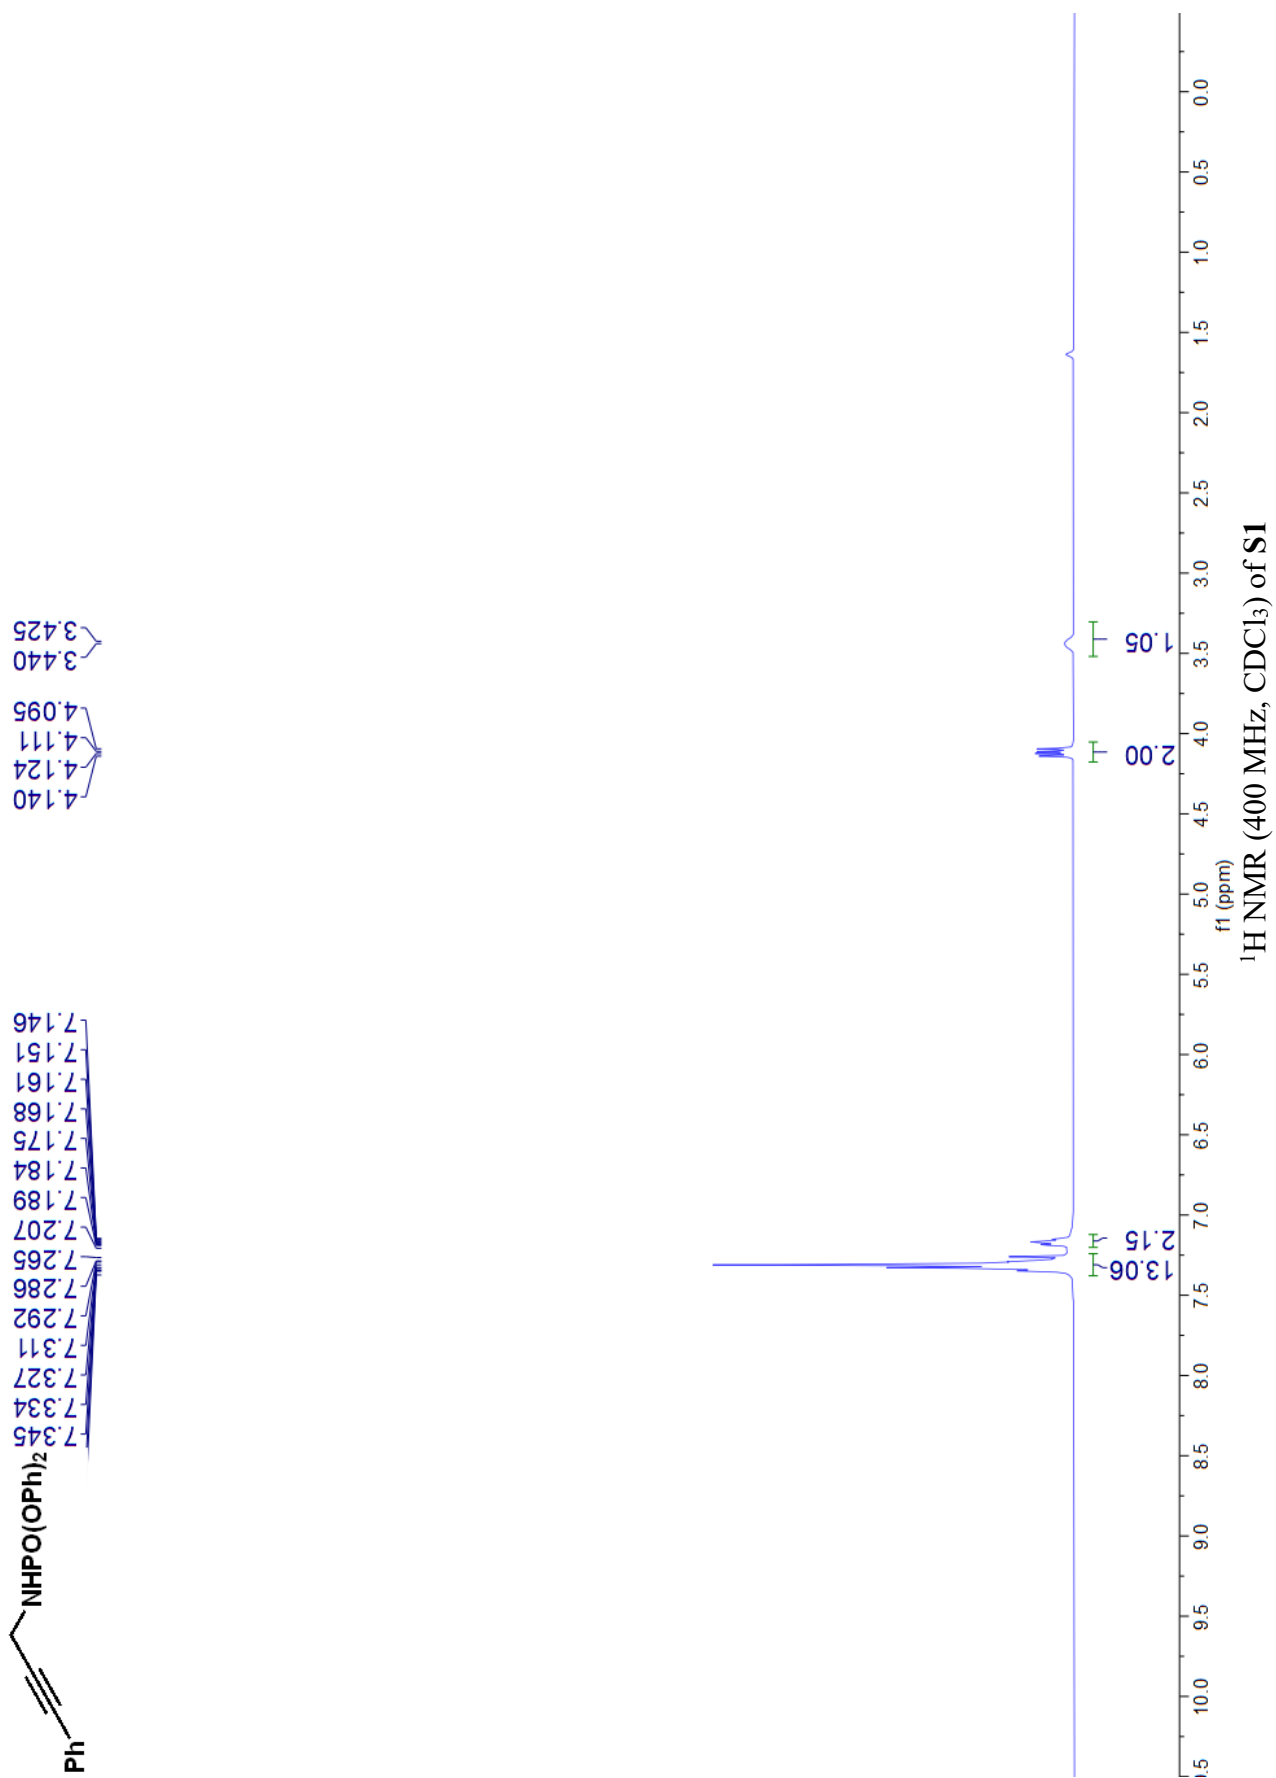



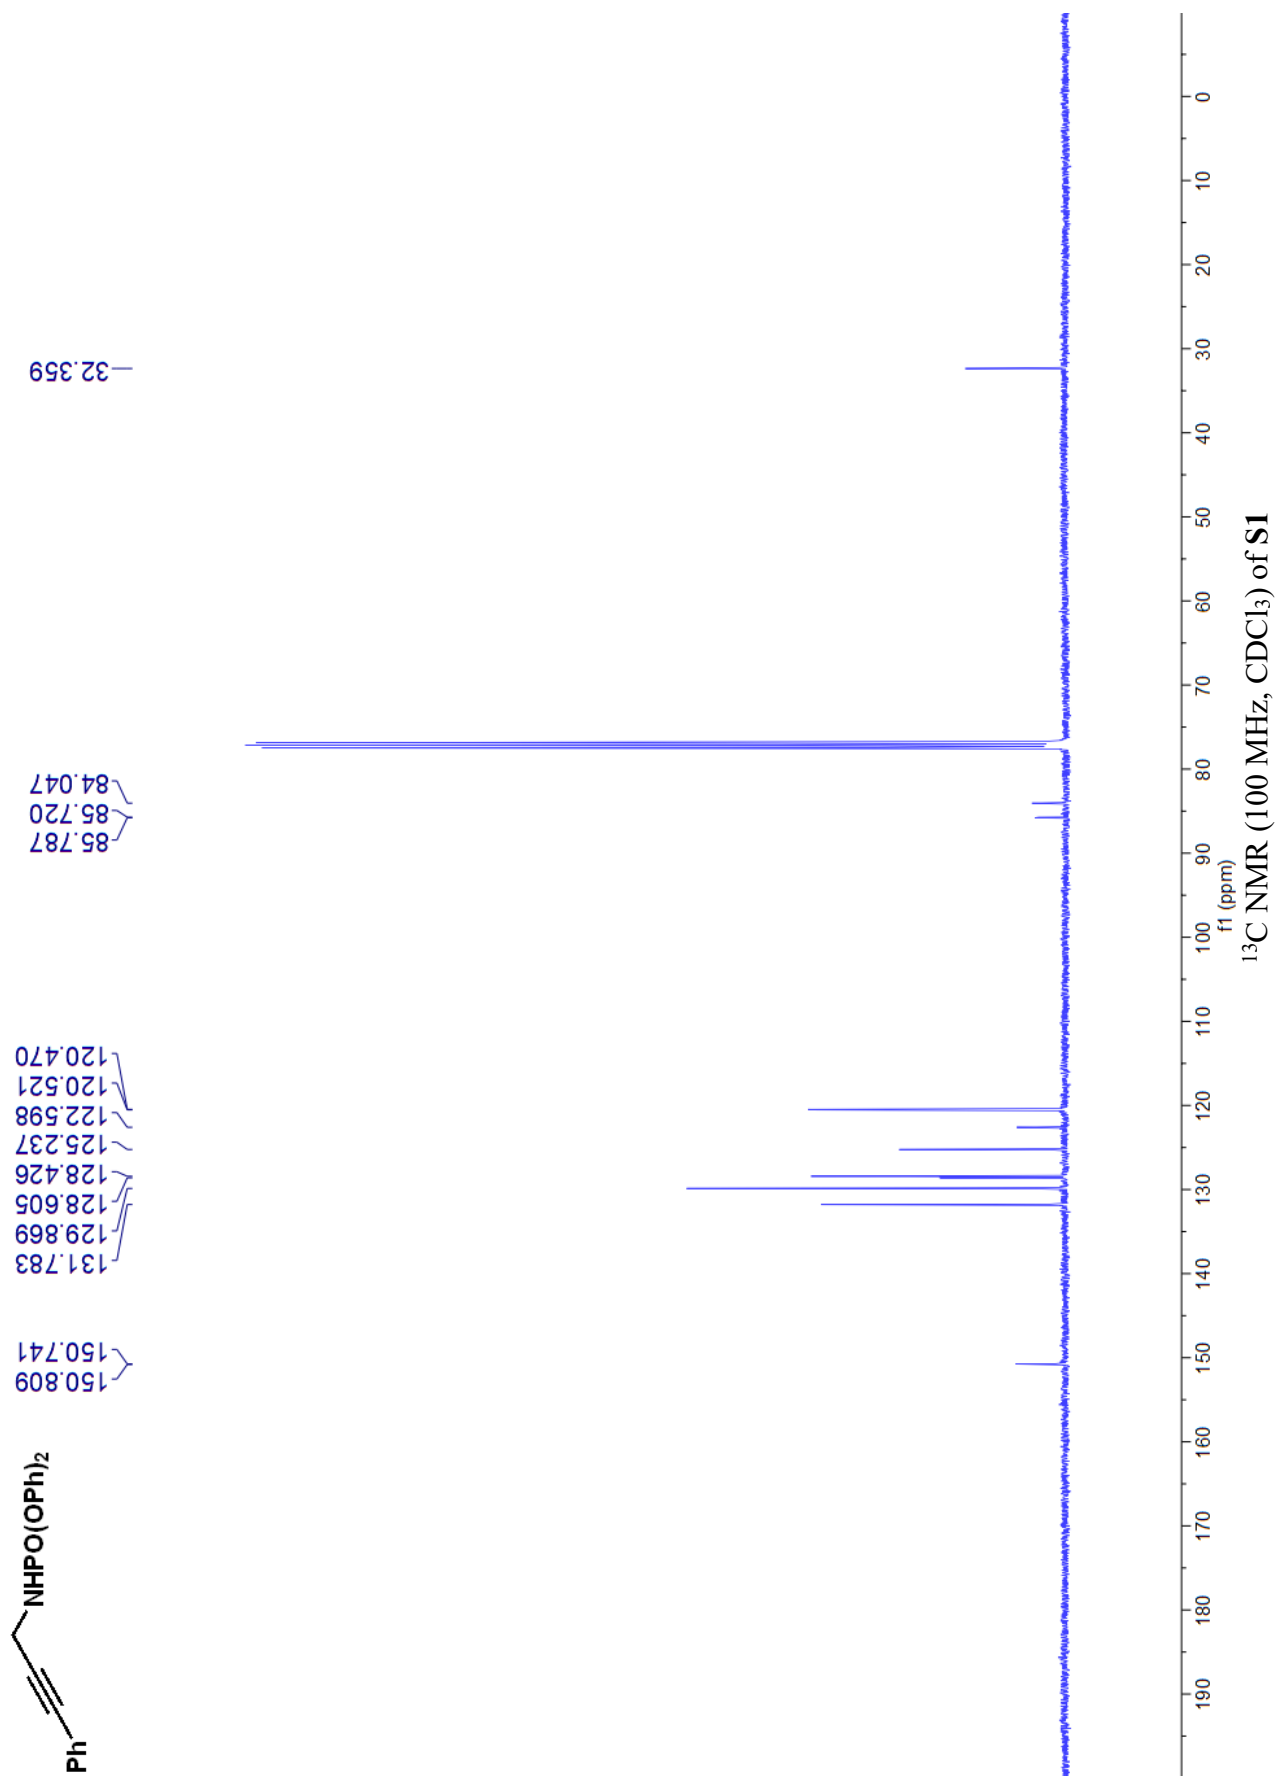

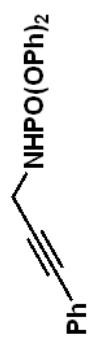

-2.003

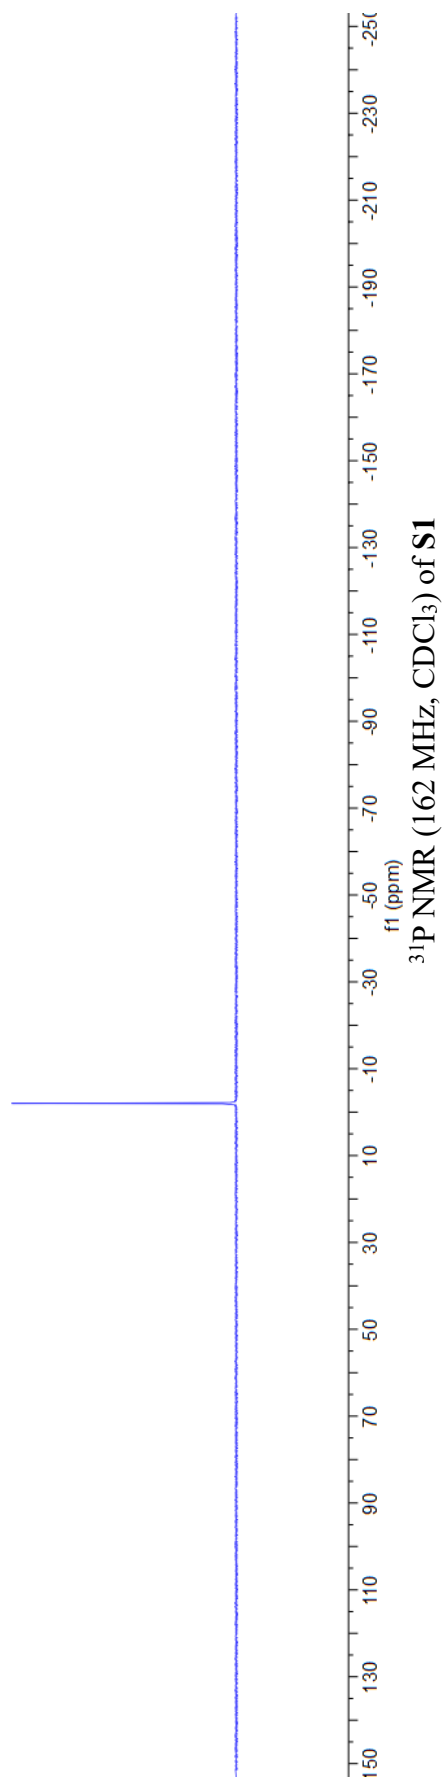

ZHX-2-187-1.1.fid

7.721  
7.701  
7.485  
7.466  
7.447  
7.312  
7.293  
7.274  
7.253  
7.247  
7.239  
7.232  
7.212  
7.193  
7.183  
7.158  
7.137  
7.123  
7.105  
7.087  
4.735  
4.710

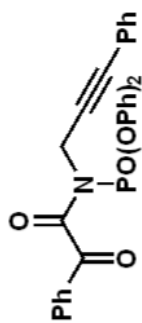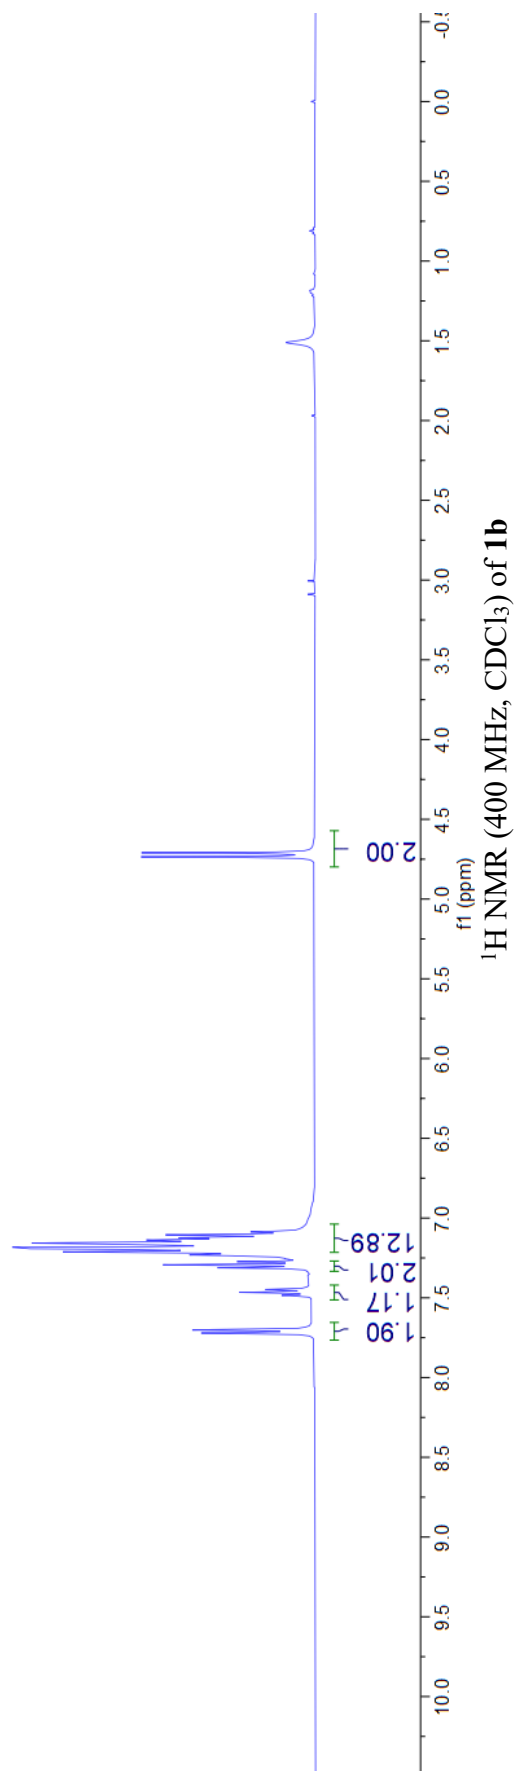

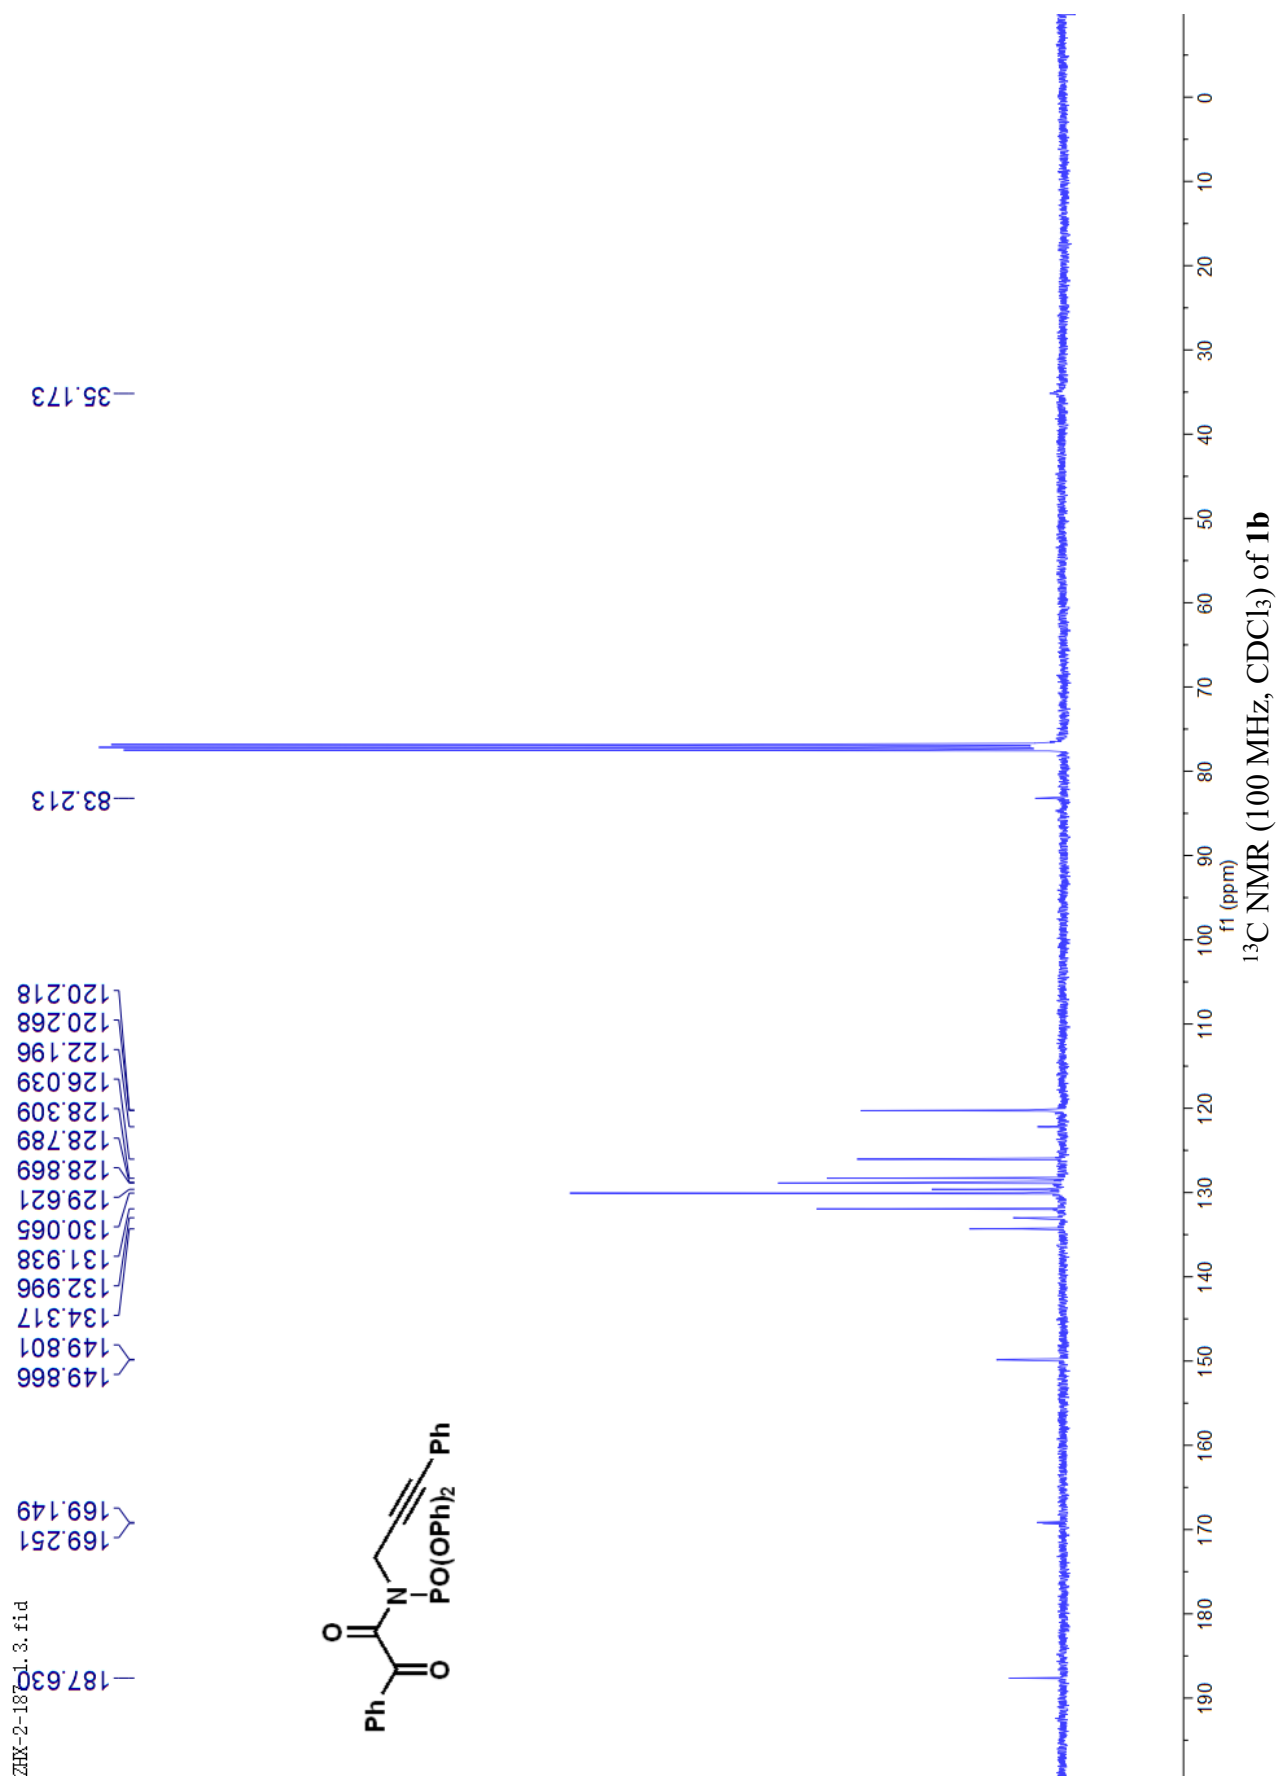

ZHX-2-187-P. 1. fid

-10.273

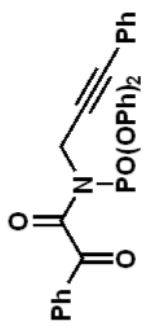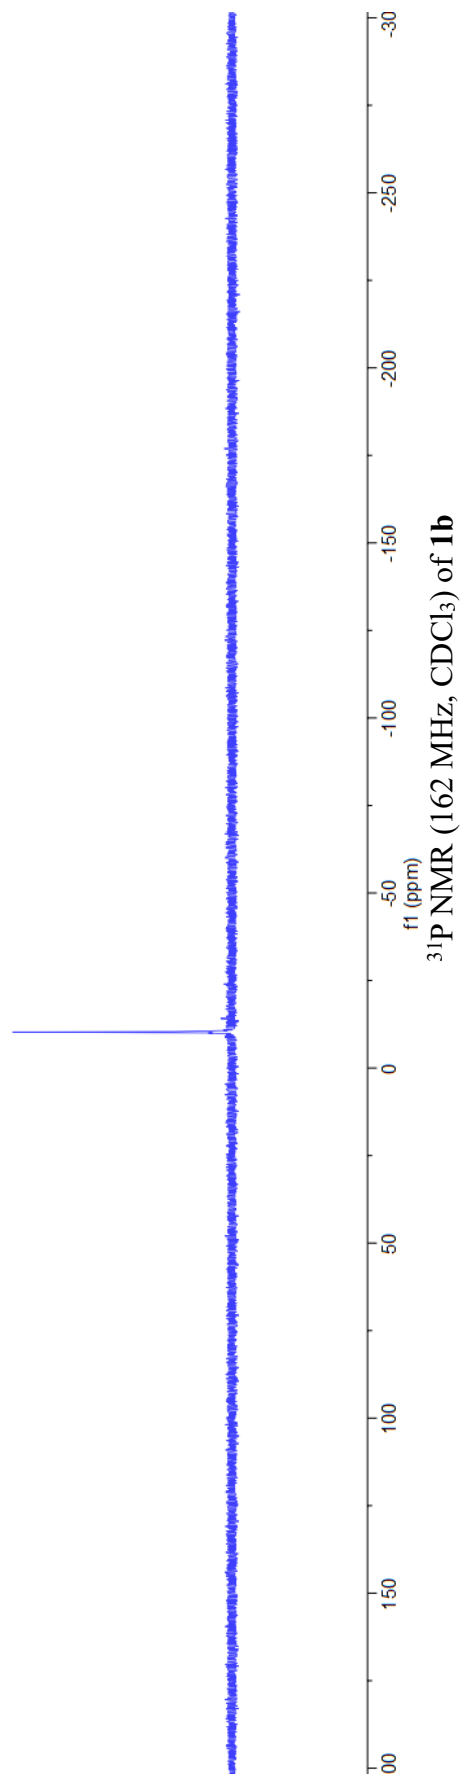

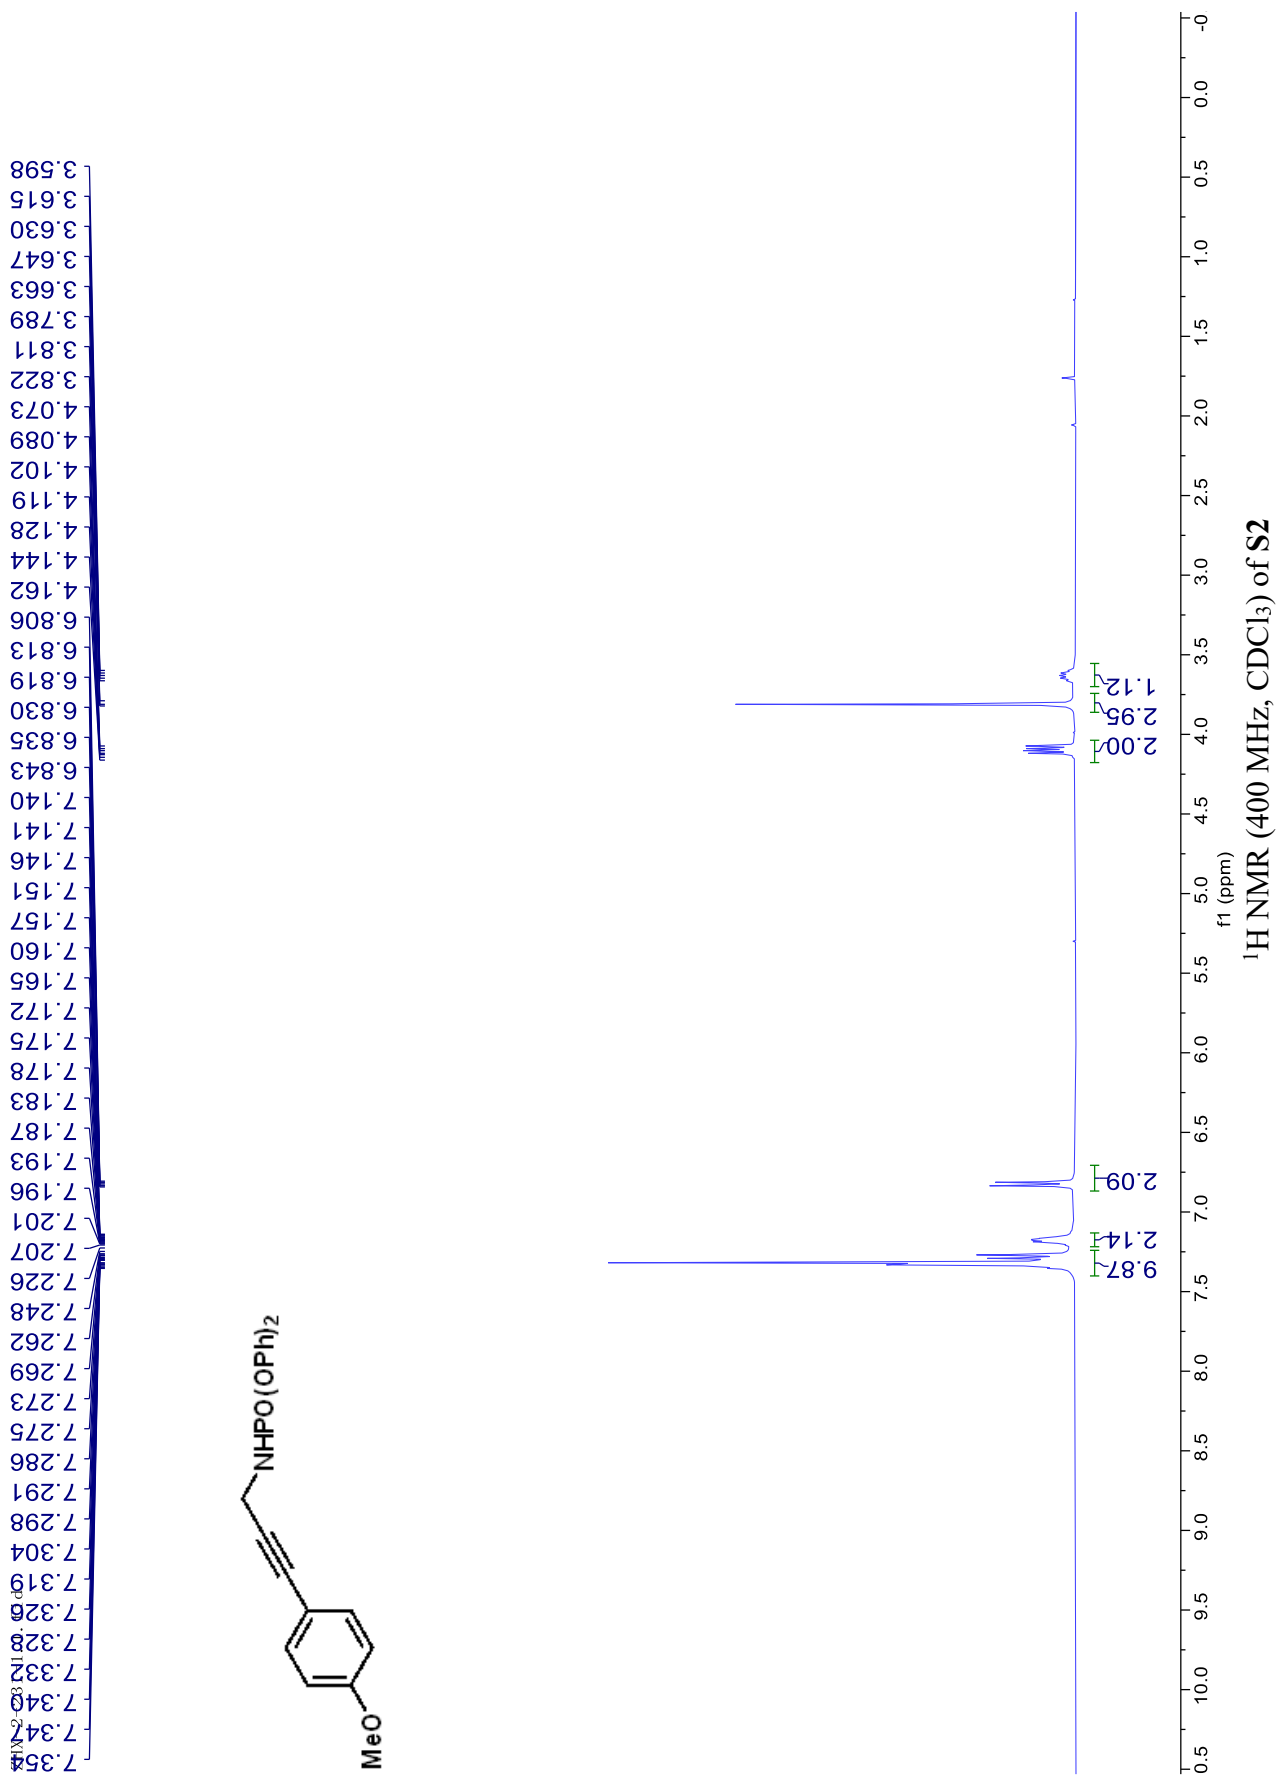

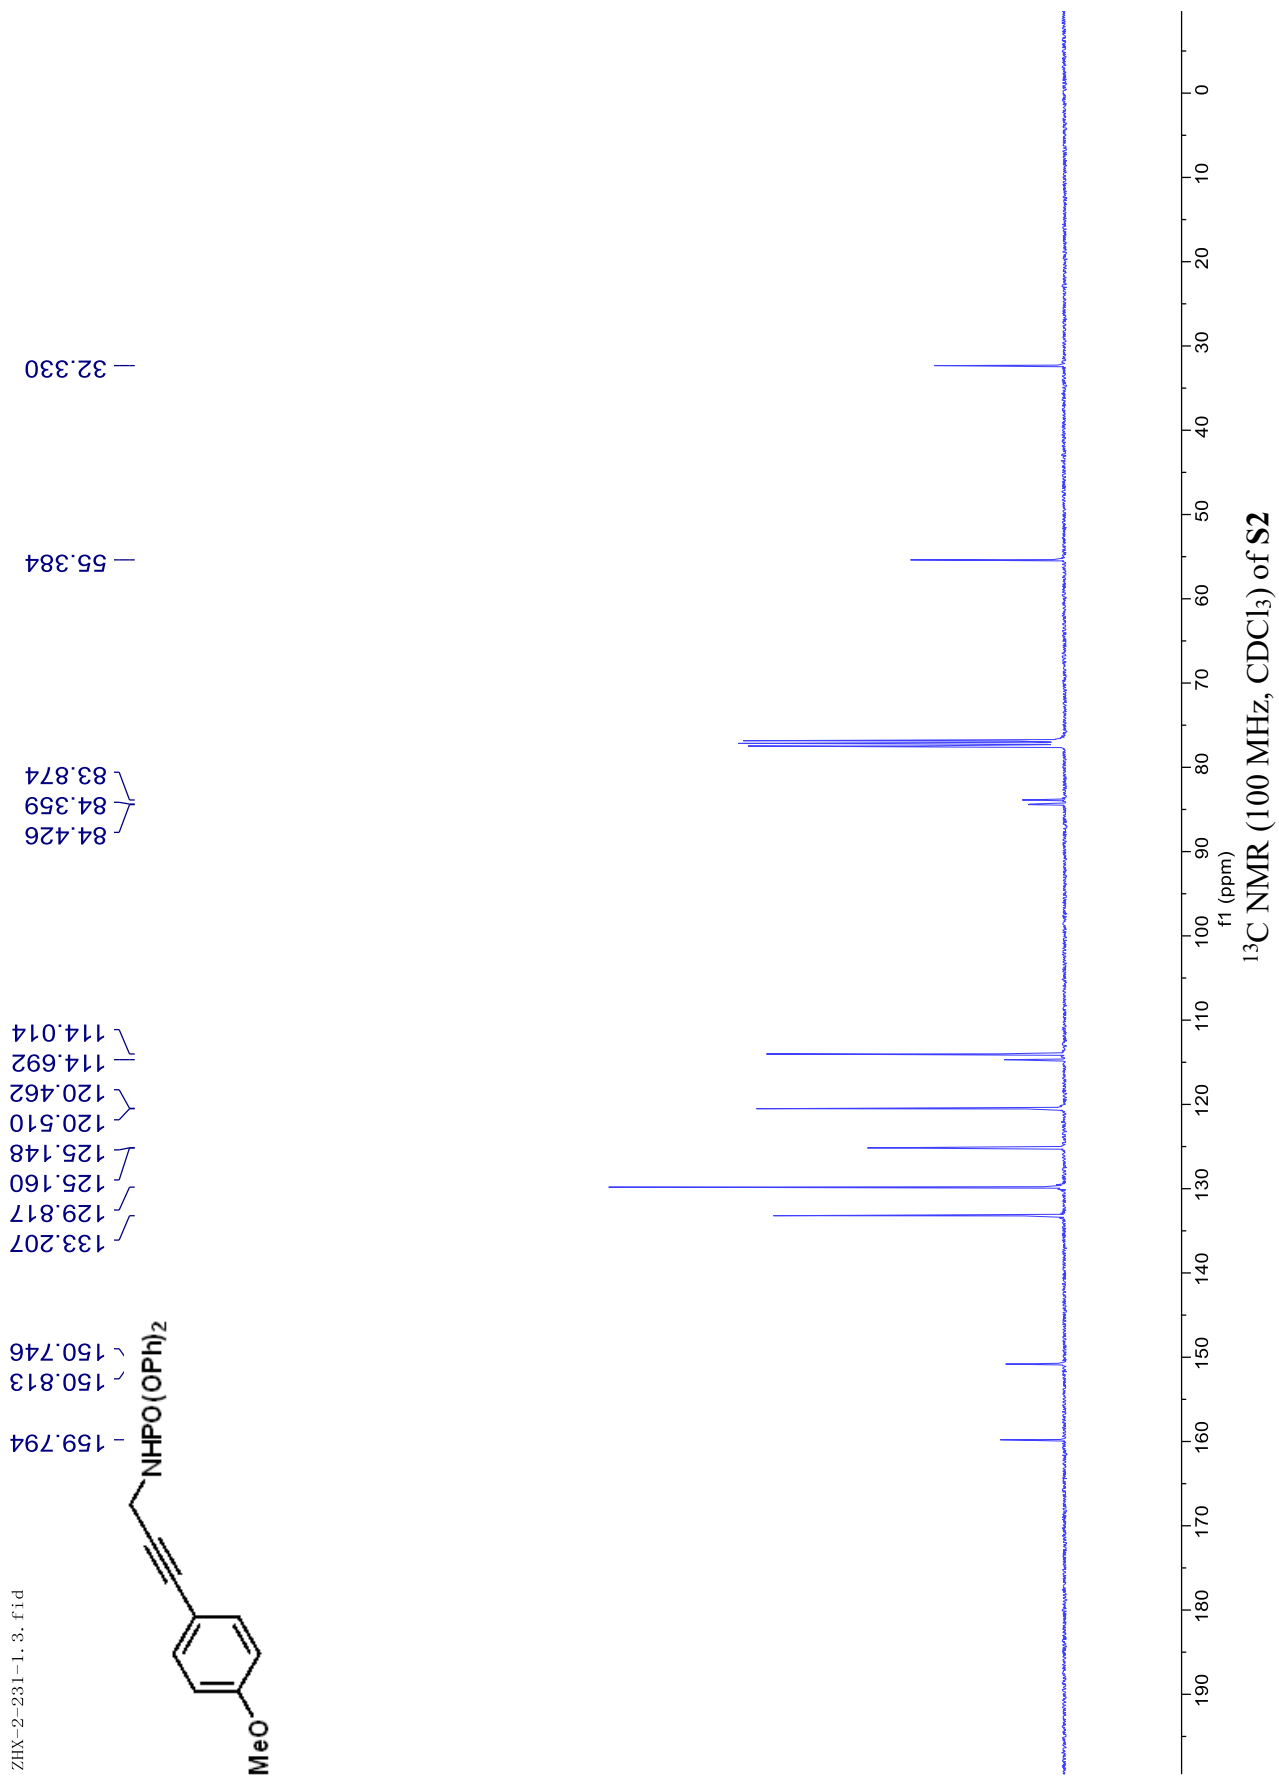

ZHX-2-231-1. 2. f1d

-1.828

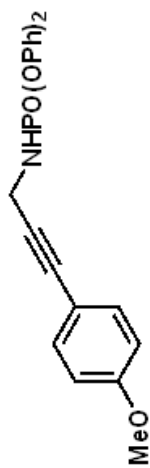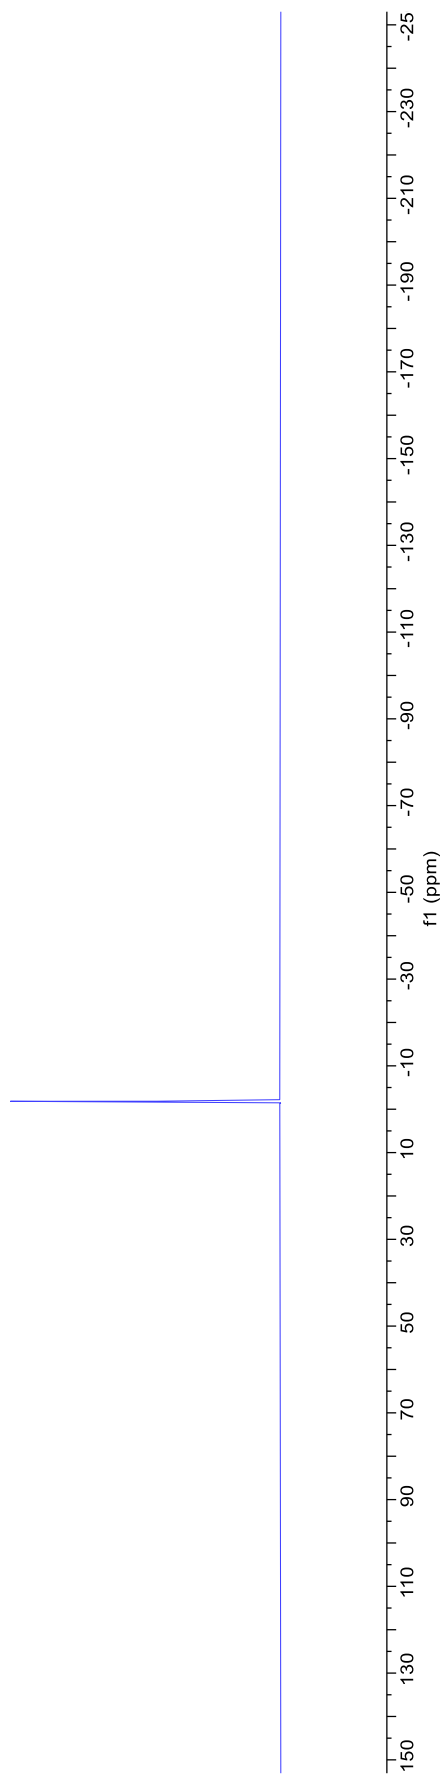



ZHV-3-21-NEXT-RE. 1. fid

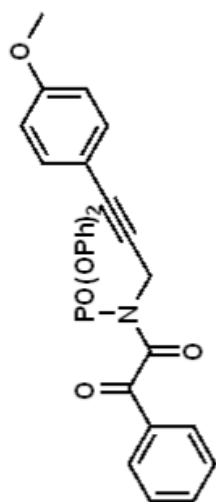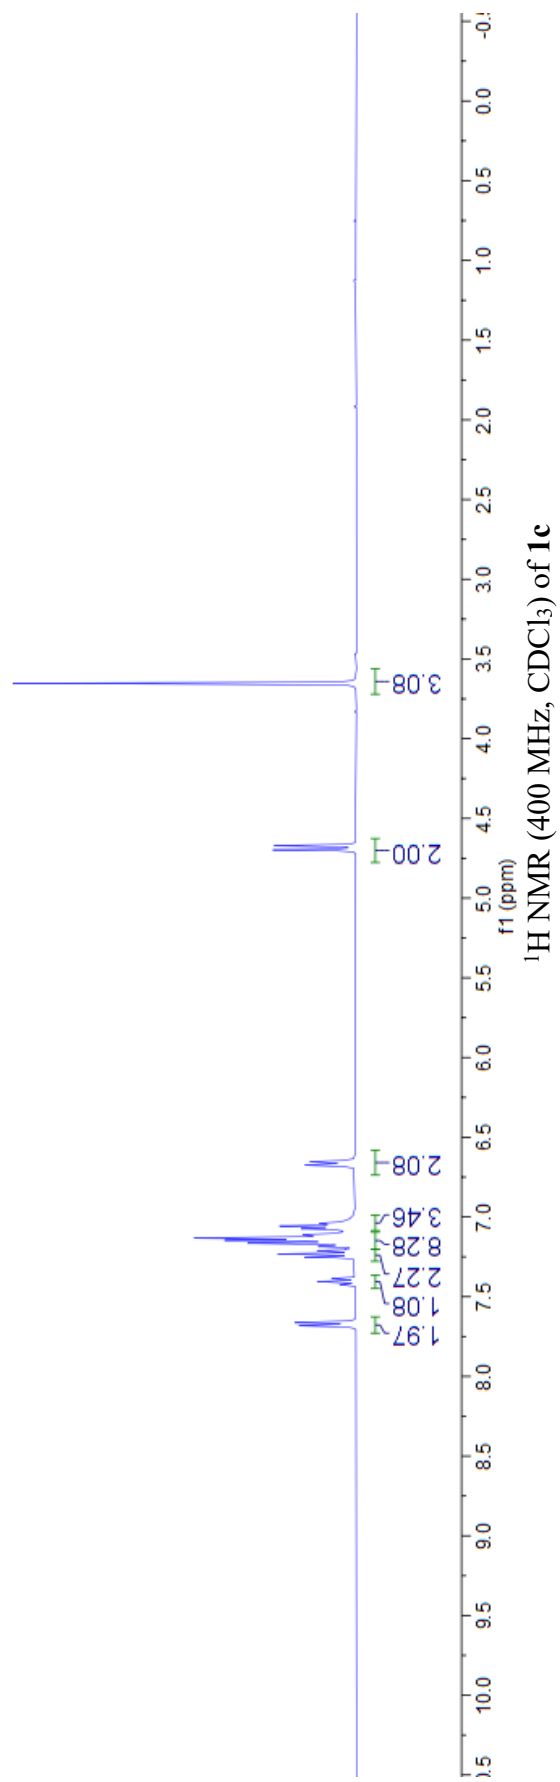

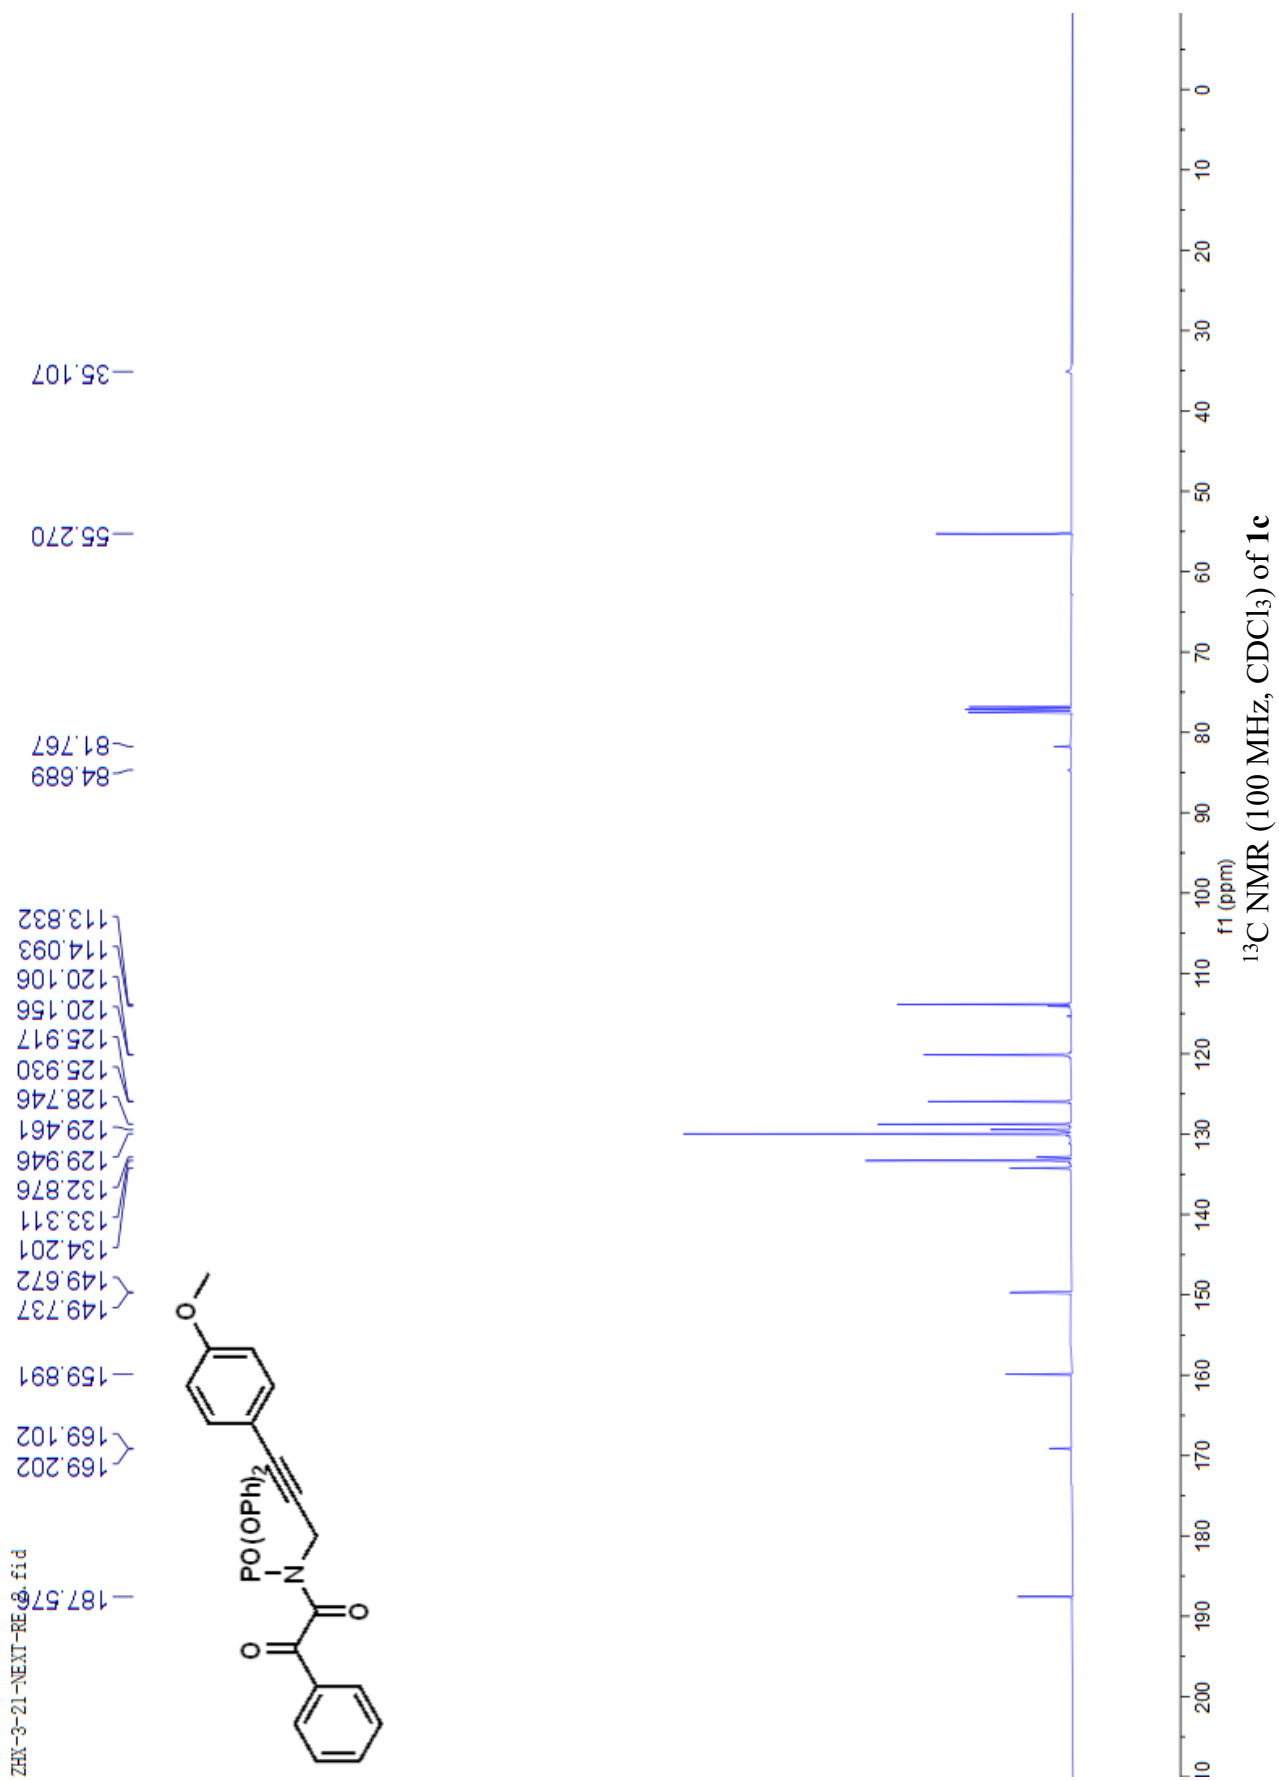

ZHX-2-236-1. 2. f1.d

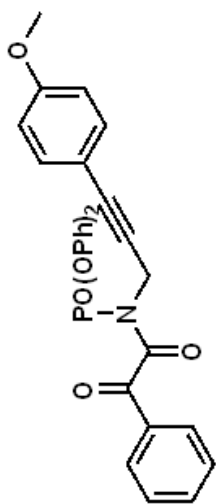

1.00 1.56

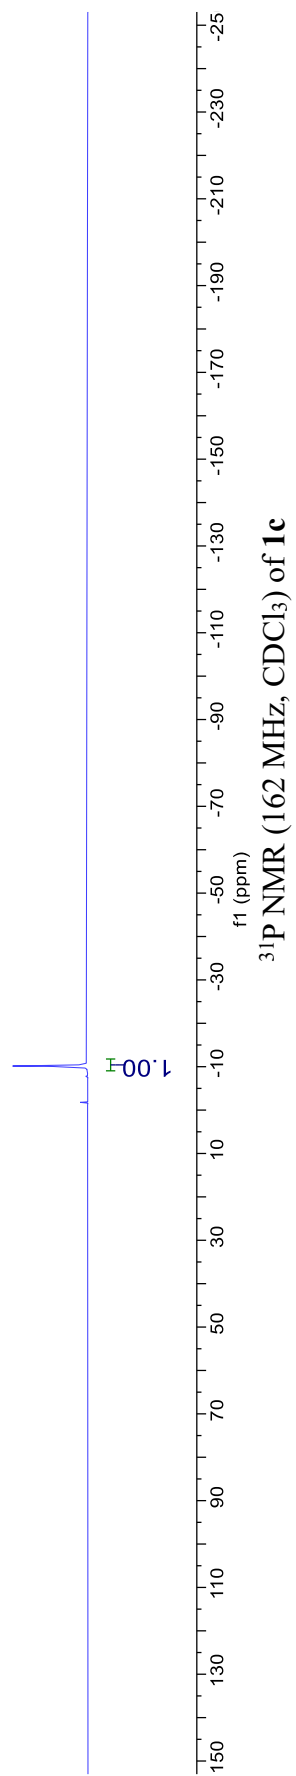



ZHX-2-232-1\_3.fid

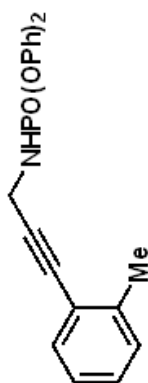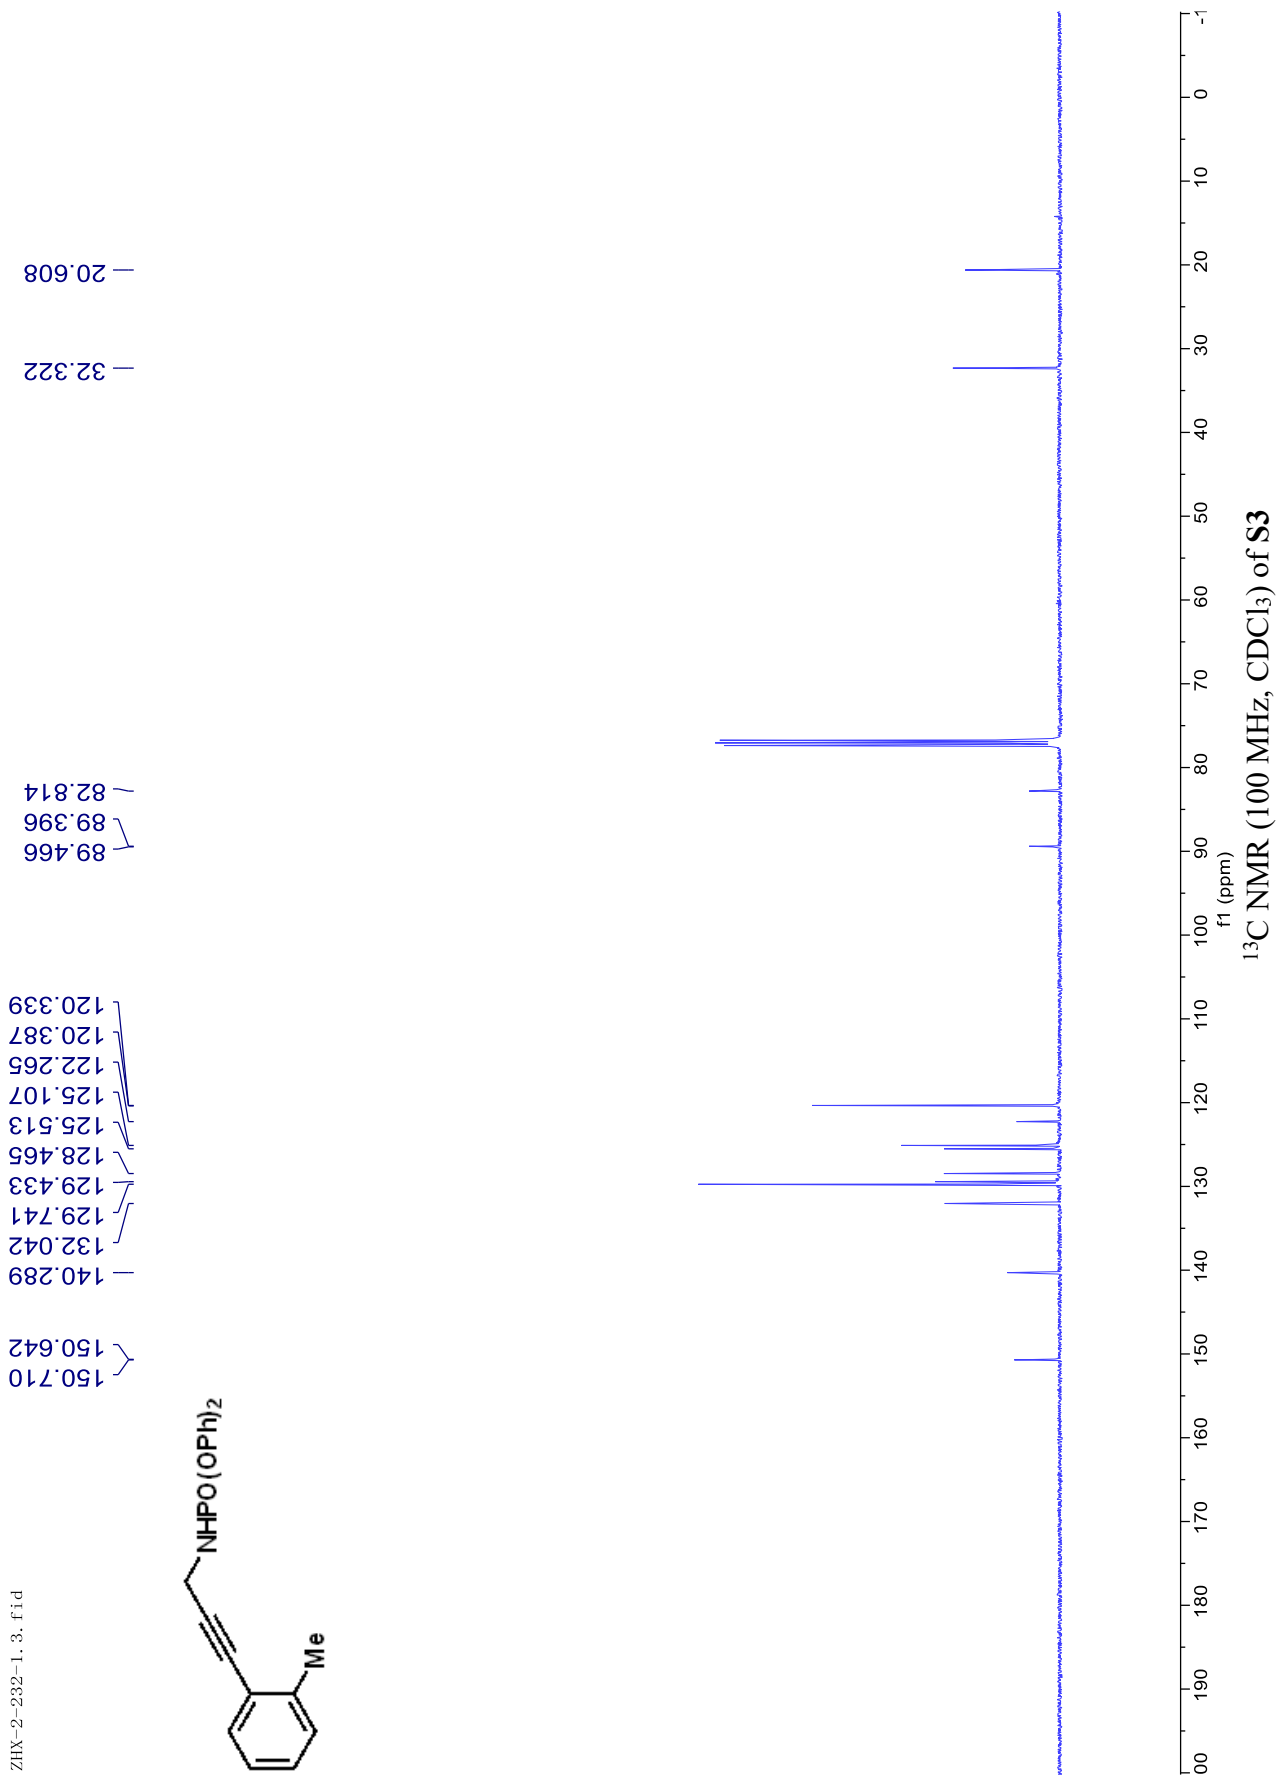

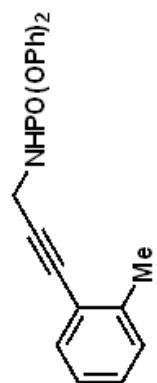

-1.907

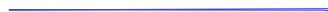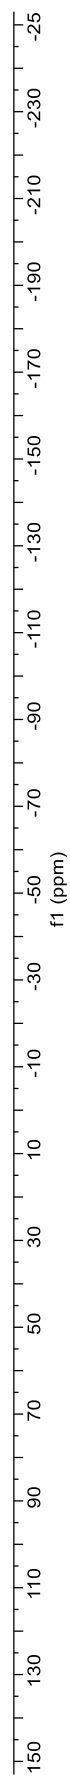

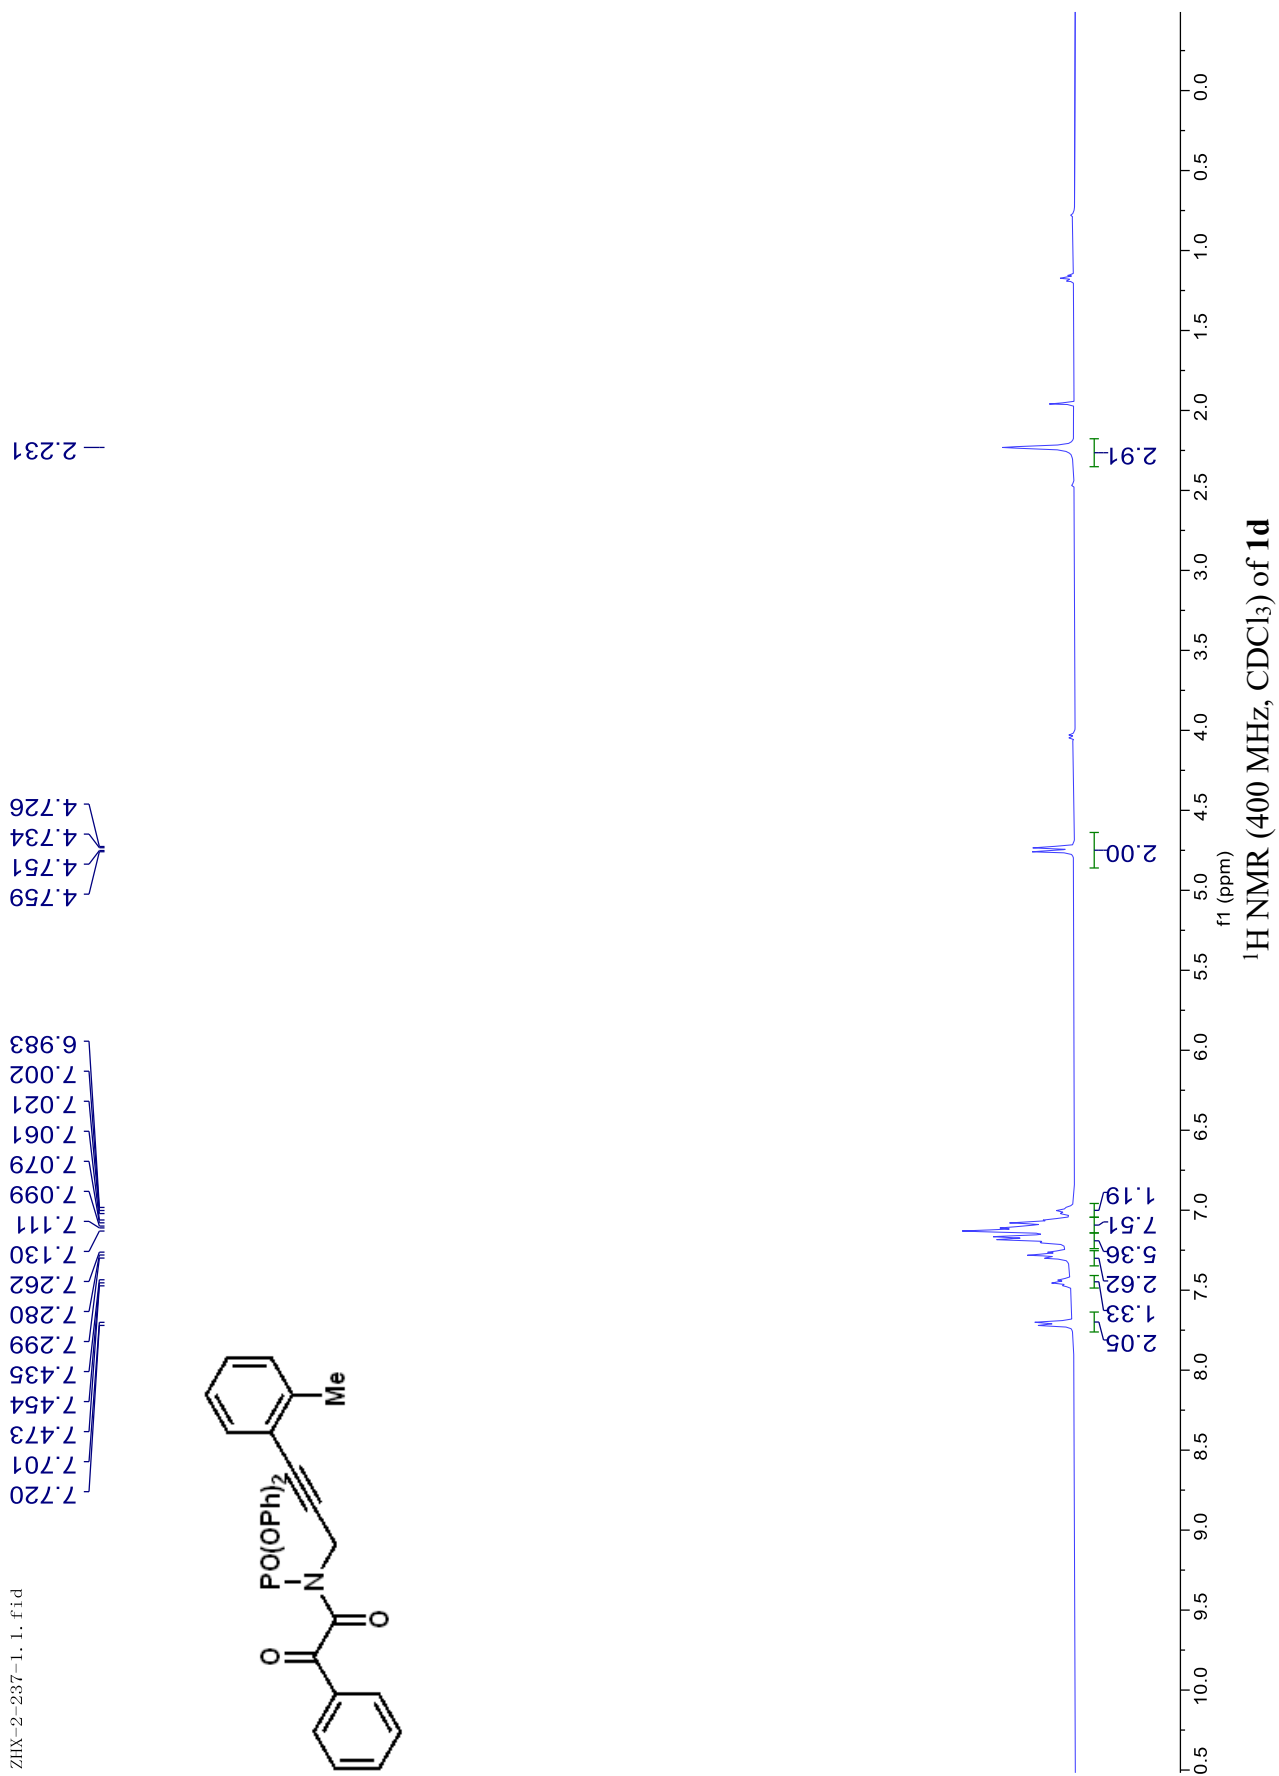

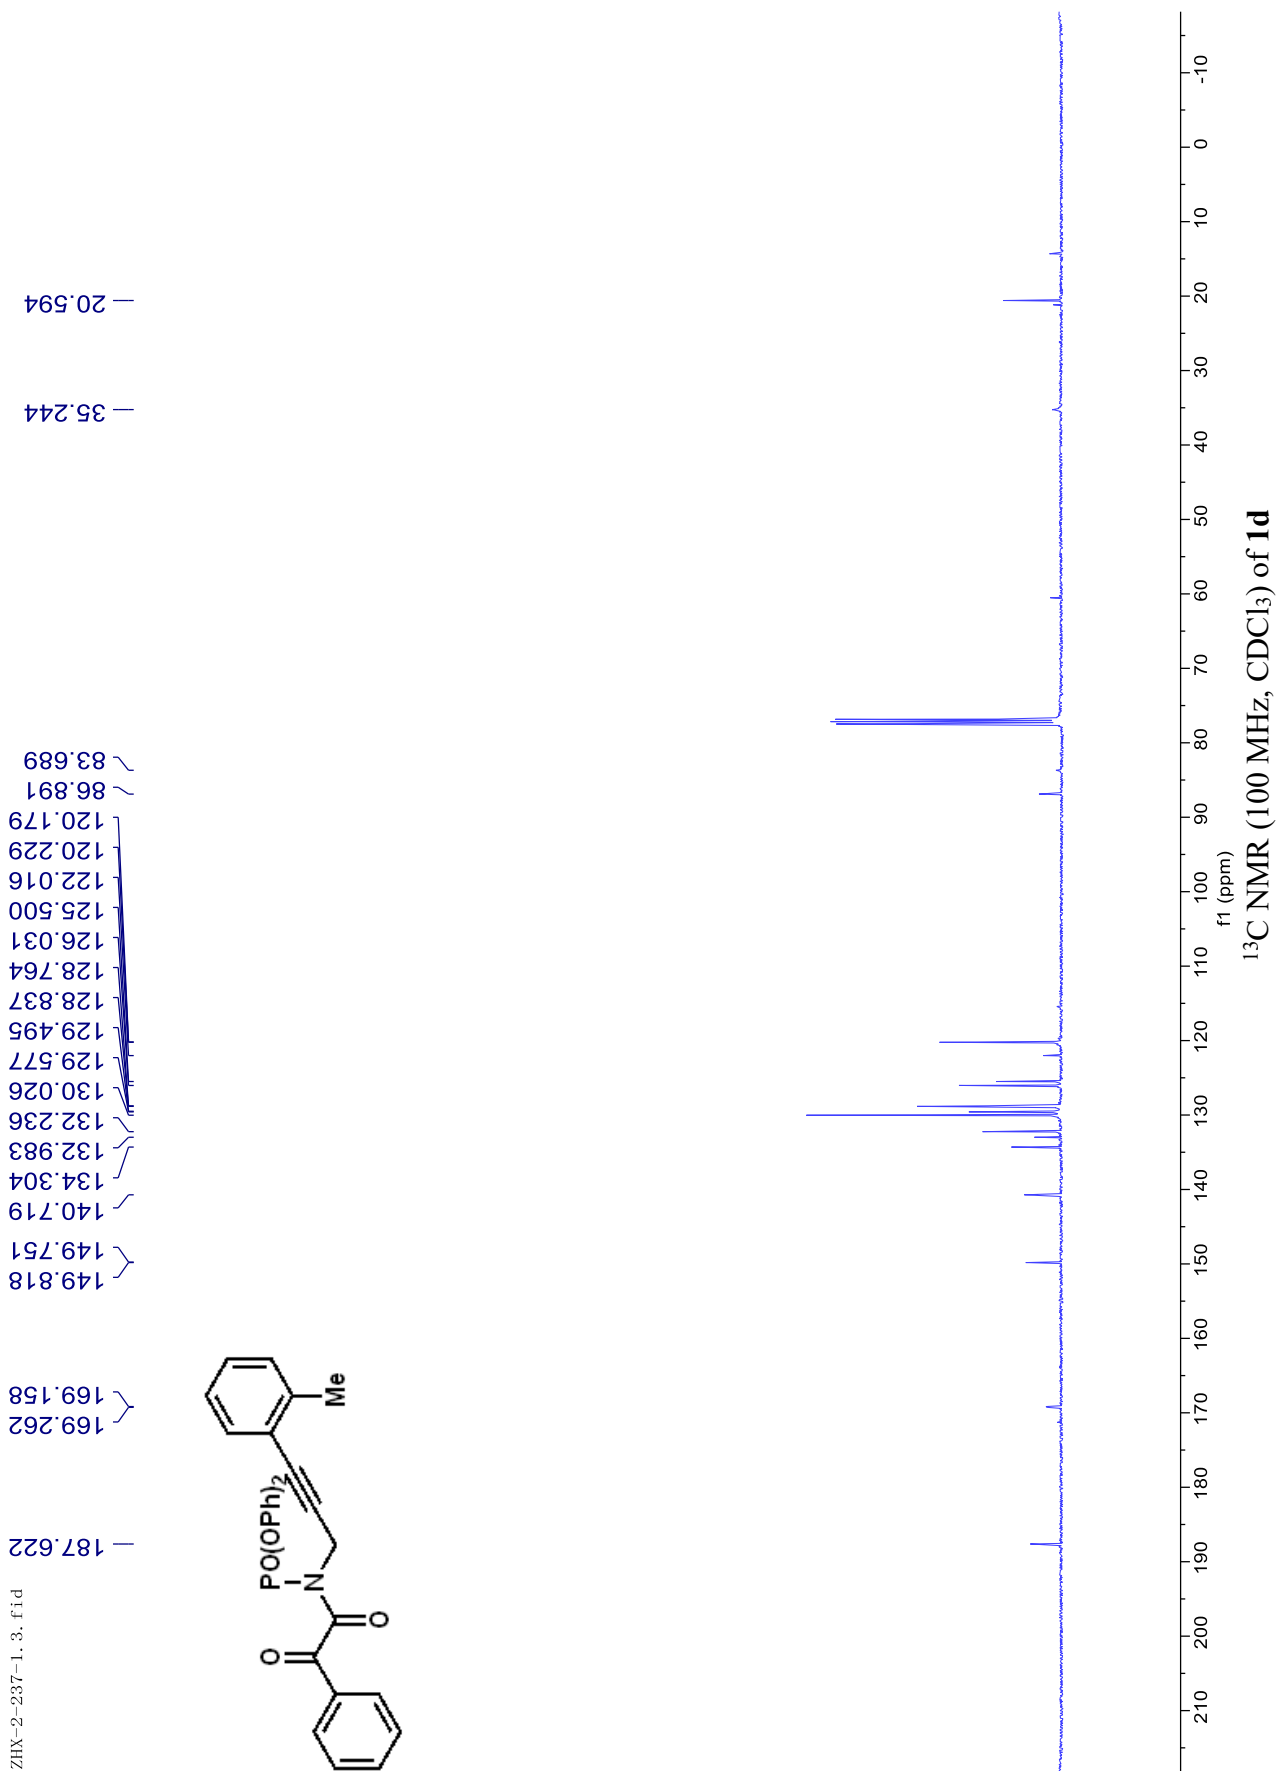



ZHX-2-237-1. 2. f1d

-10.196

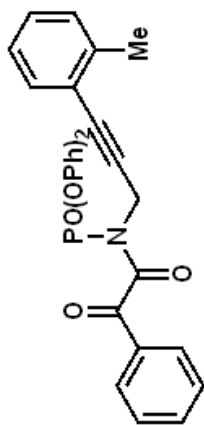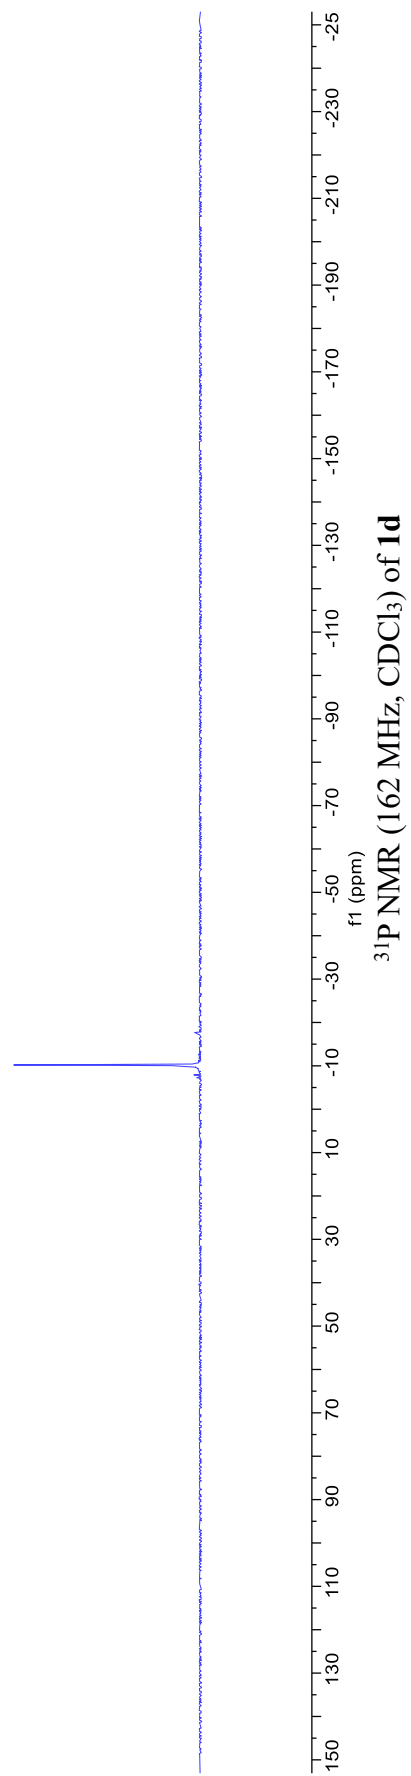

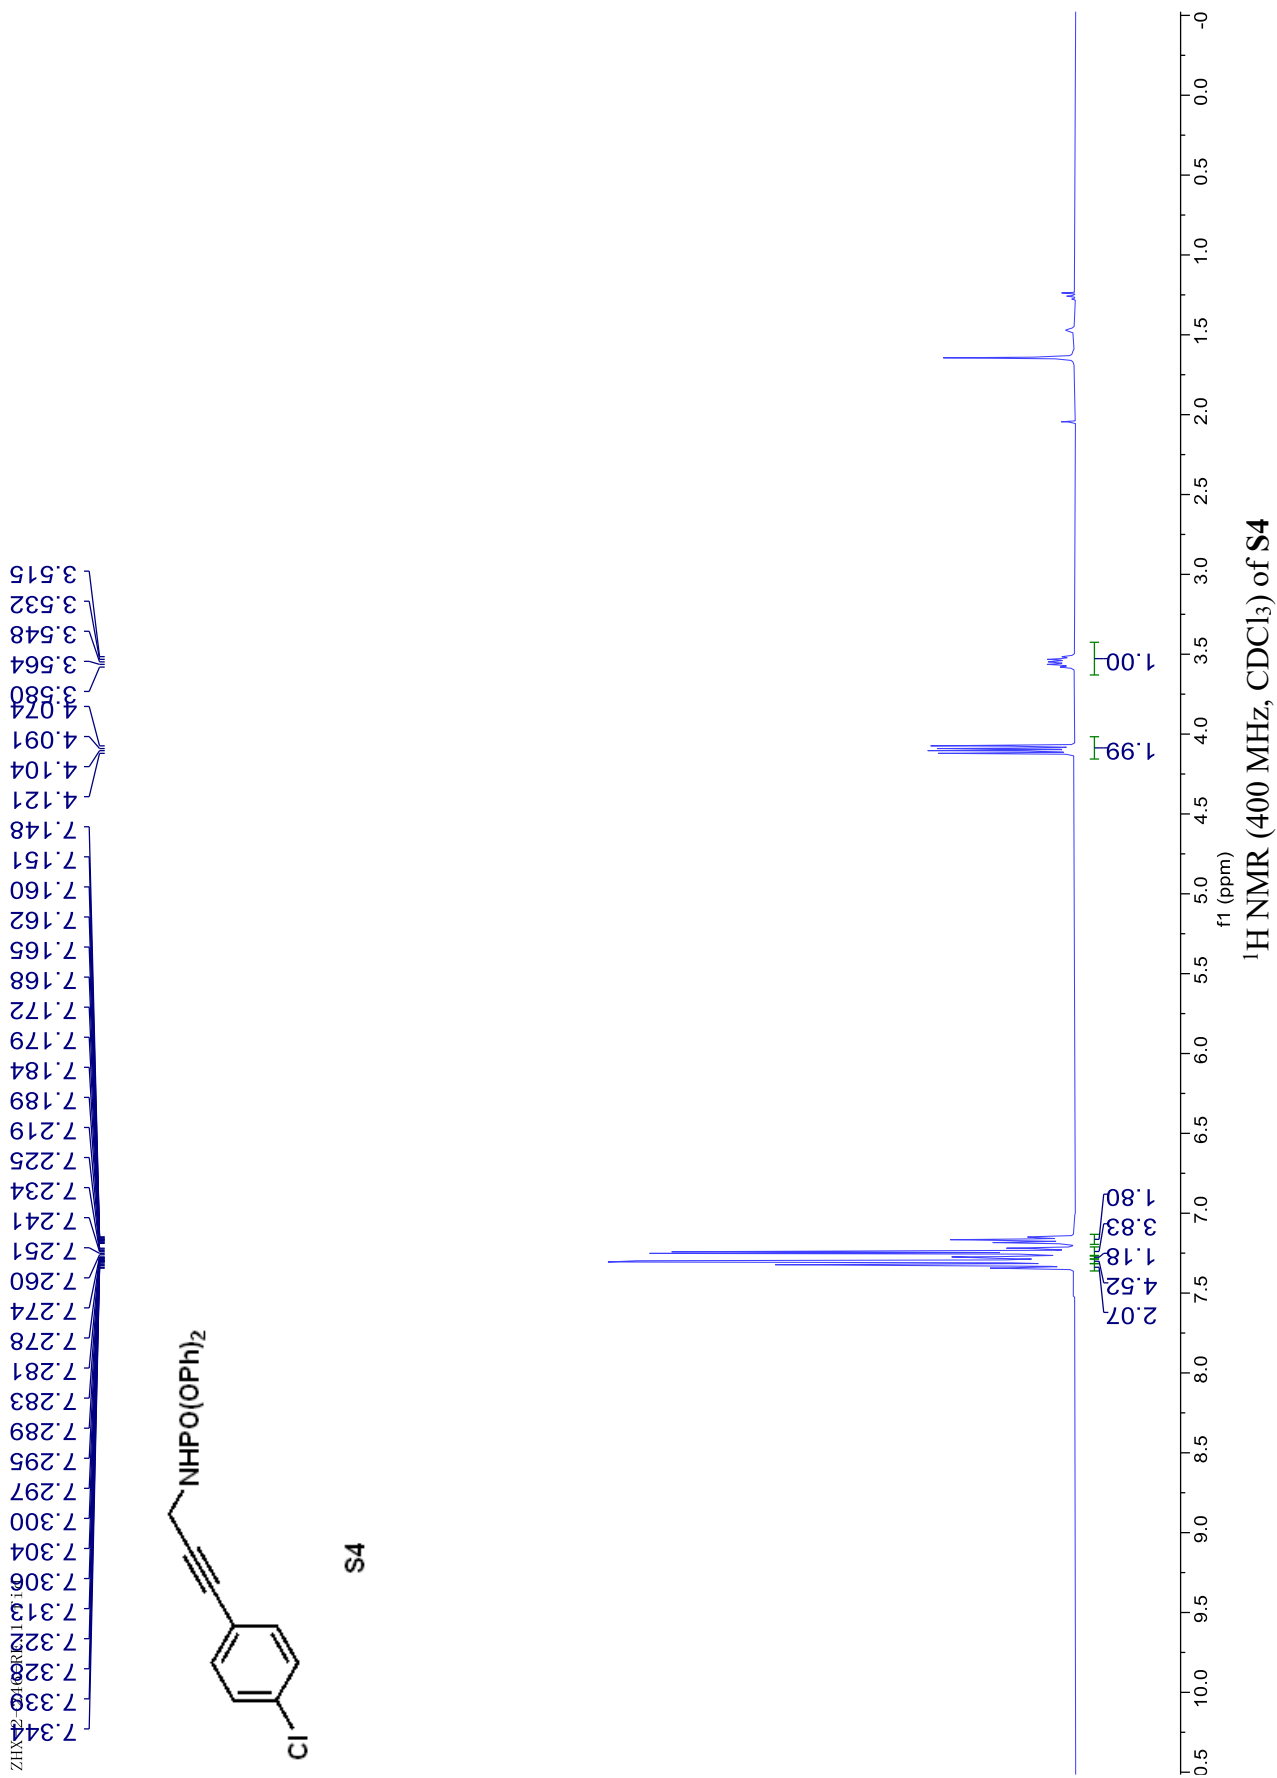

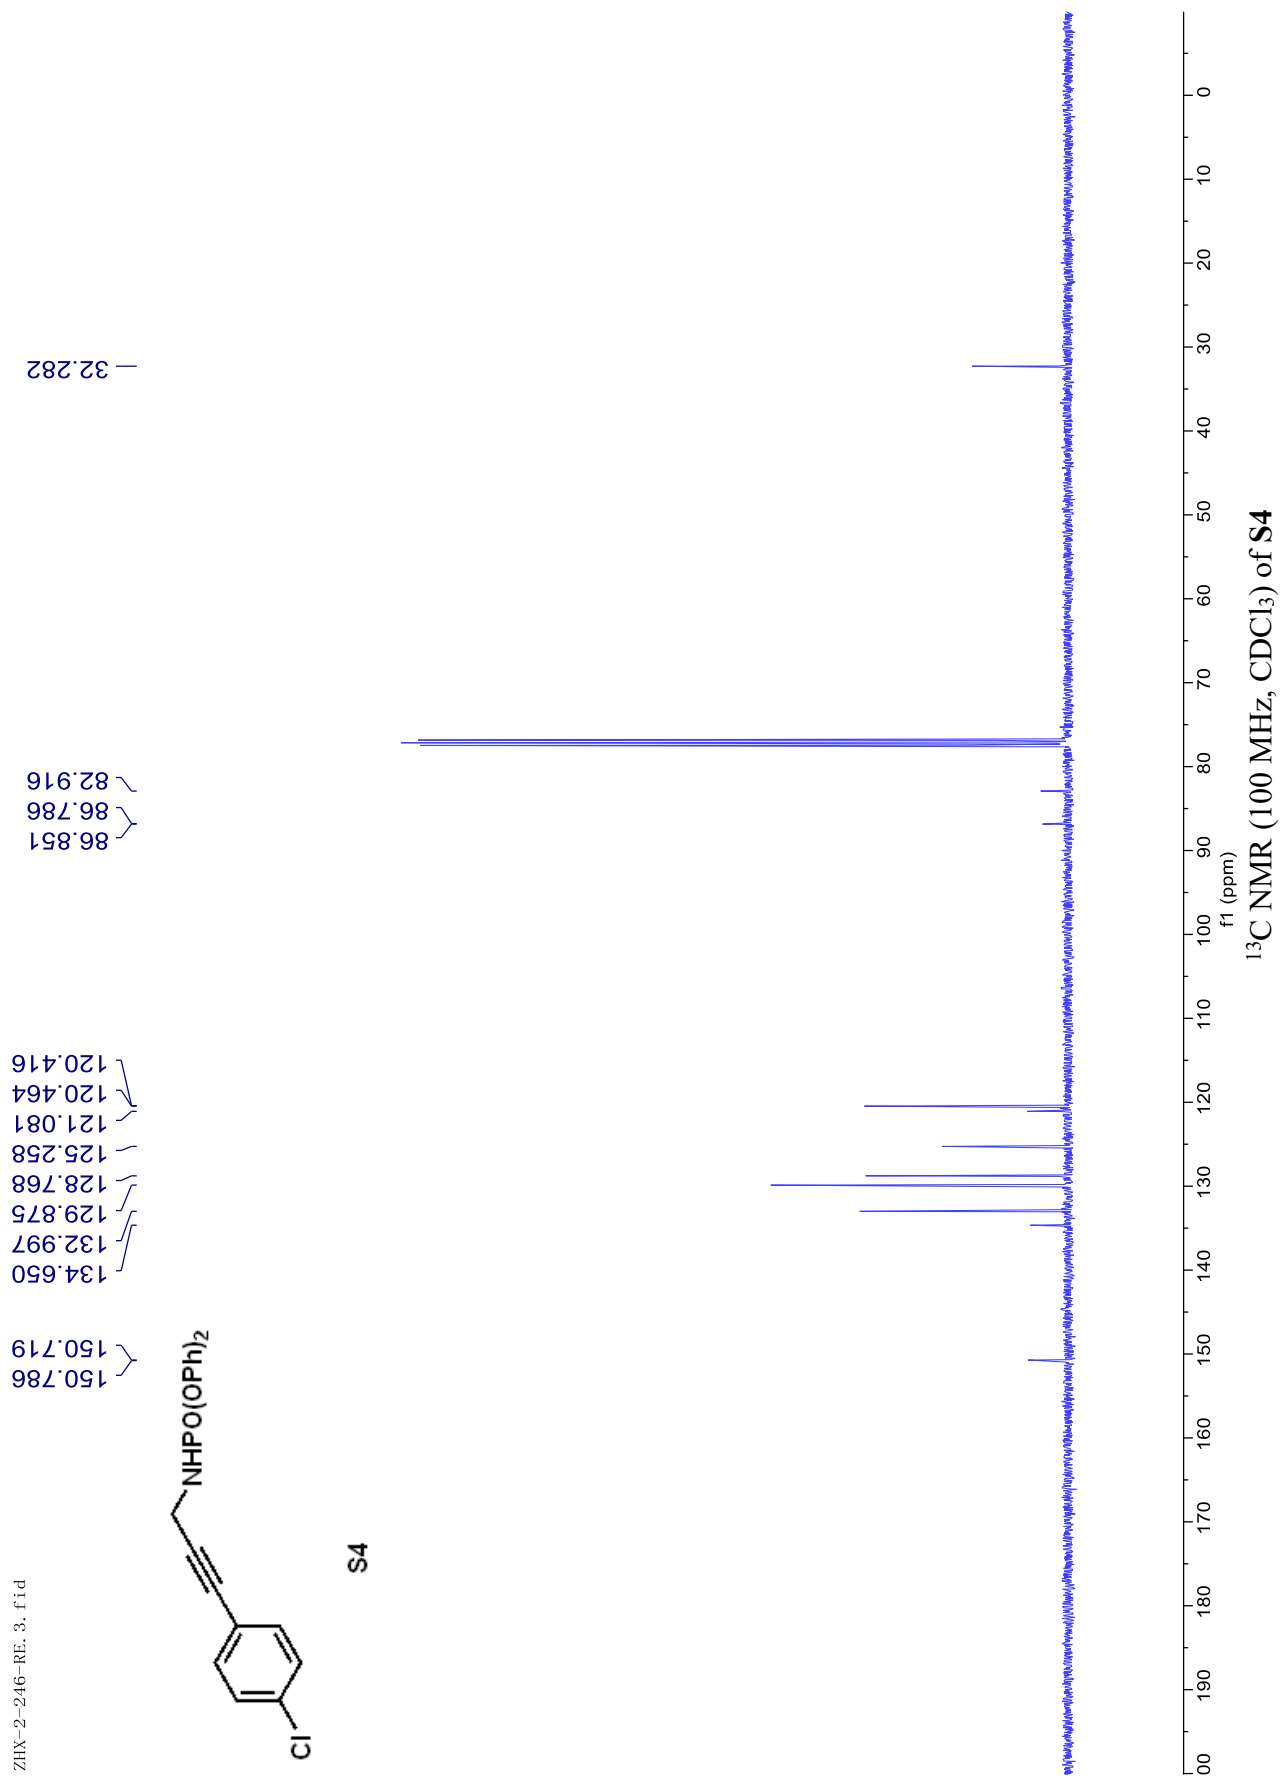

ZHX-2-246-RE. 2. fid

-2.046

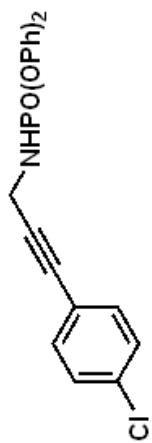

S4

SI-115

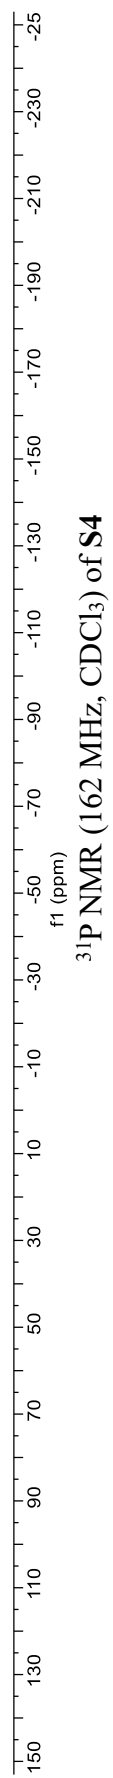

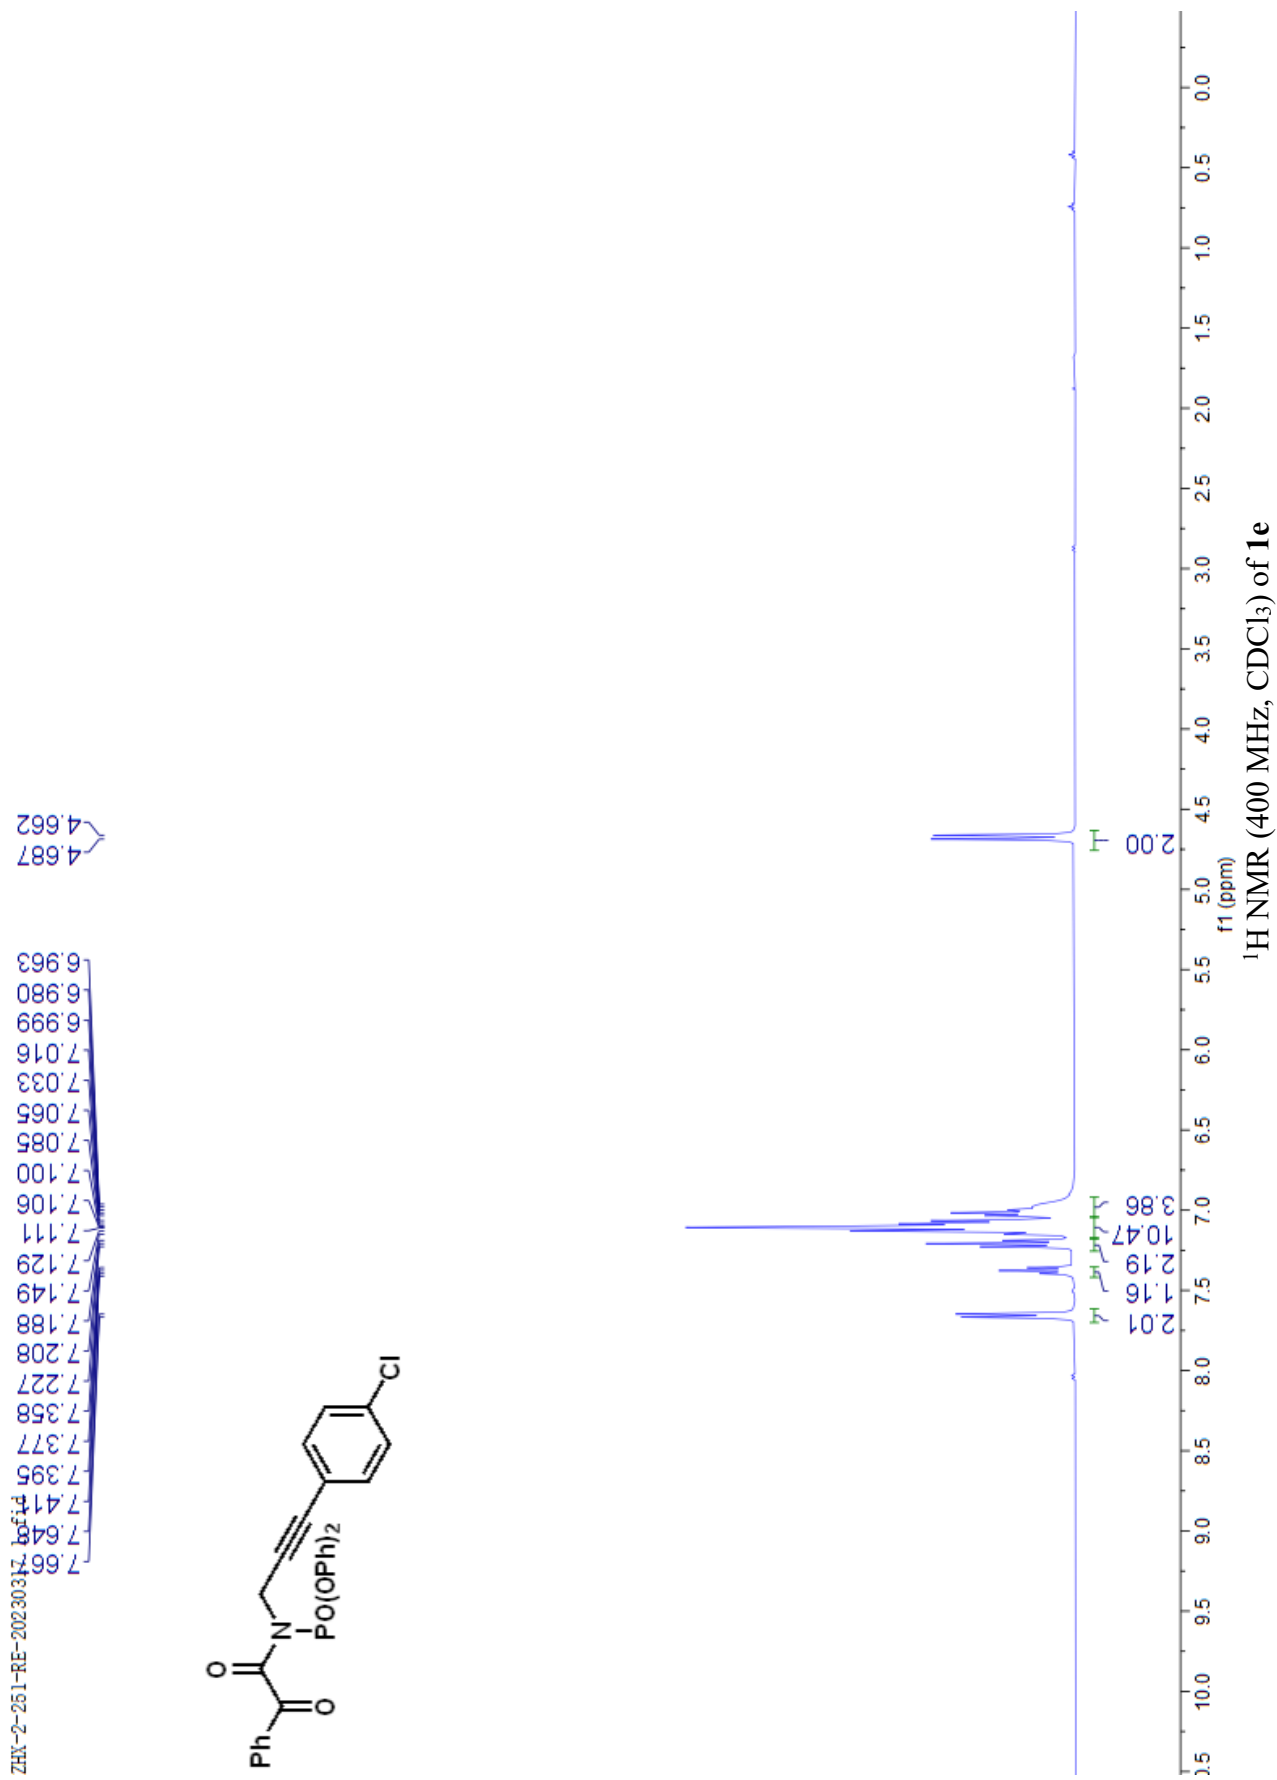

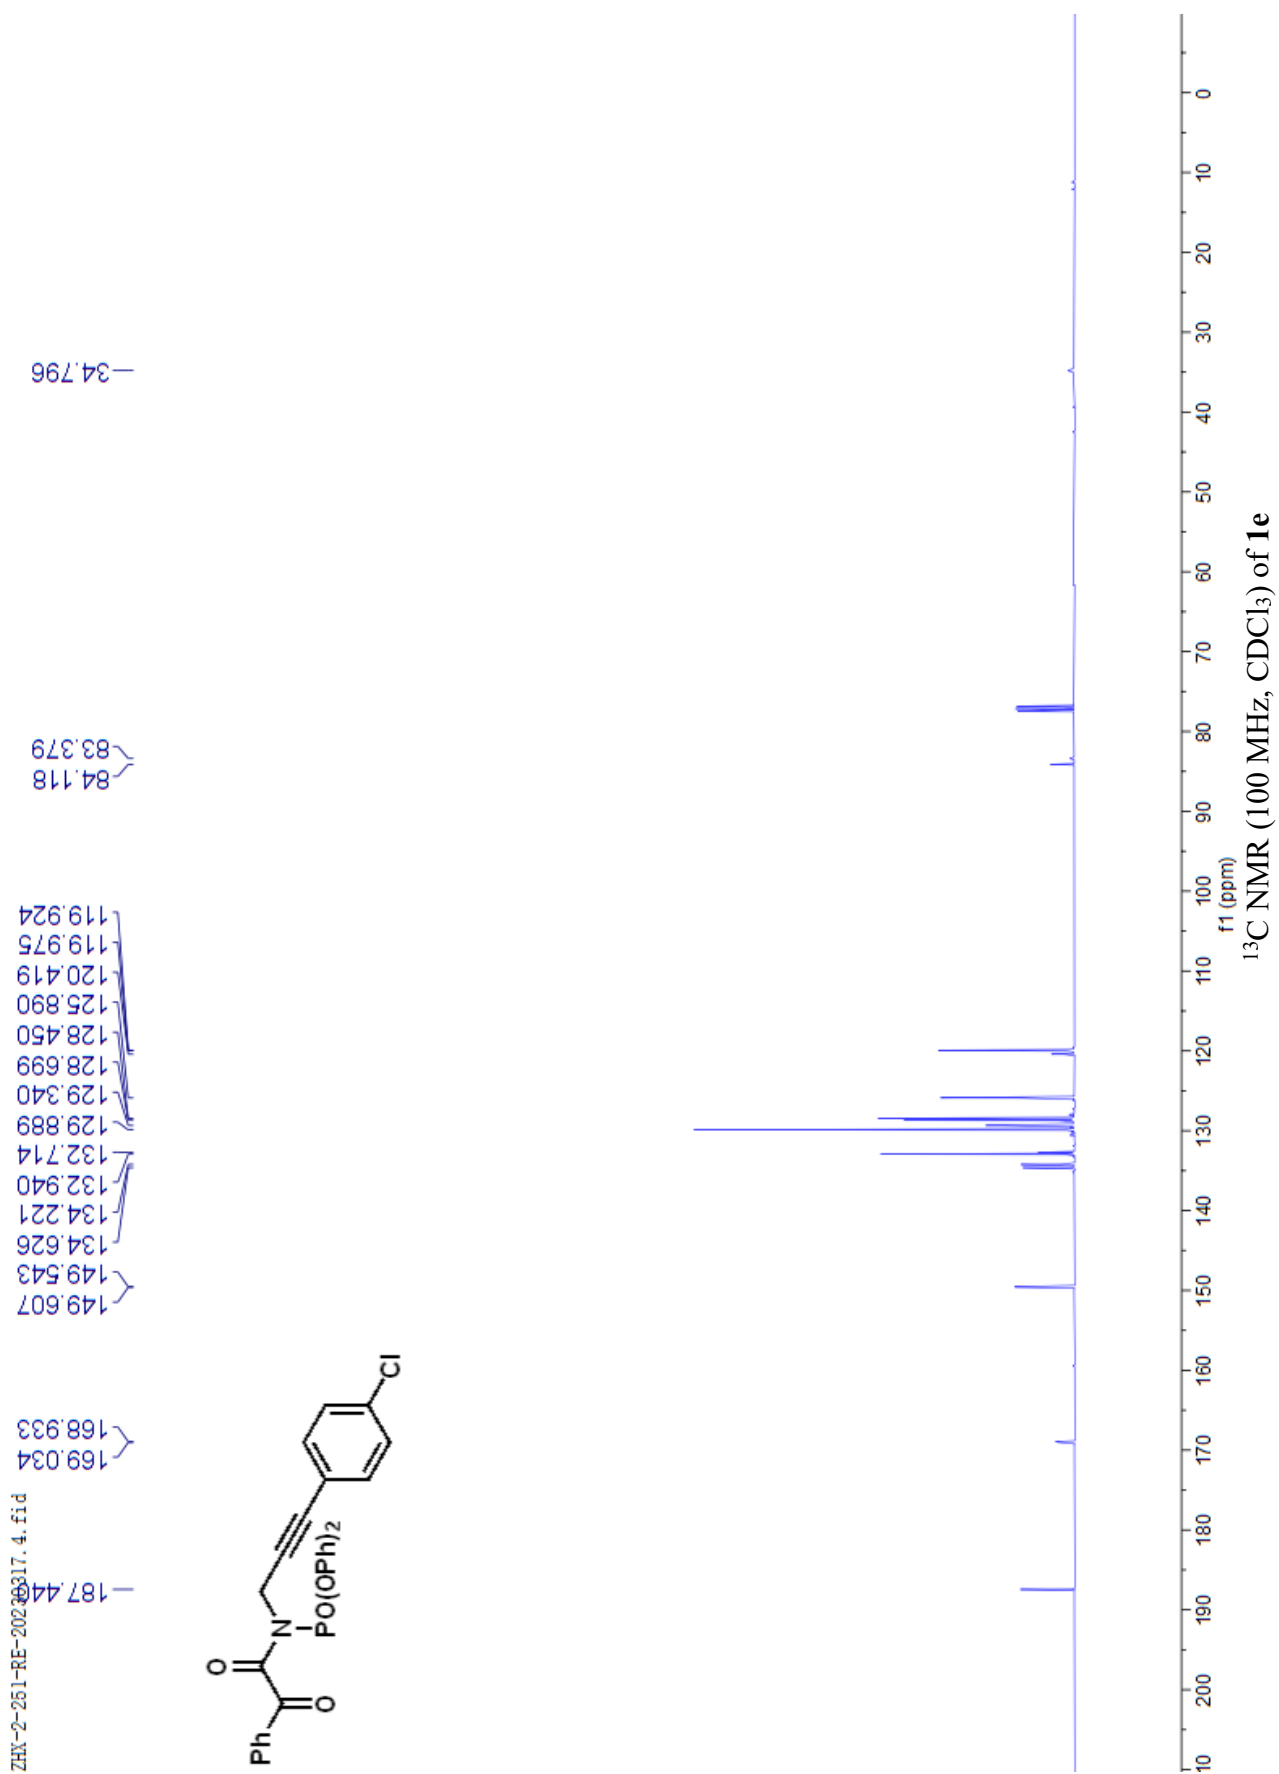

ZHY-2-251-RE-20230317. 2. fid

--10.307

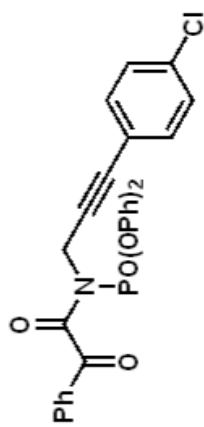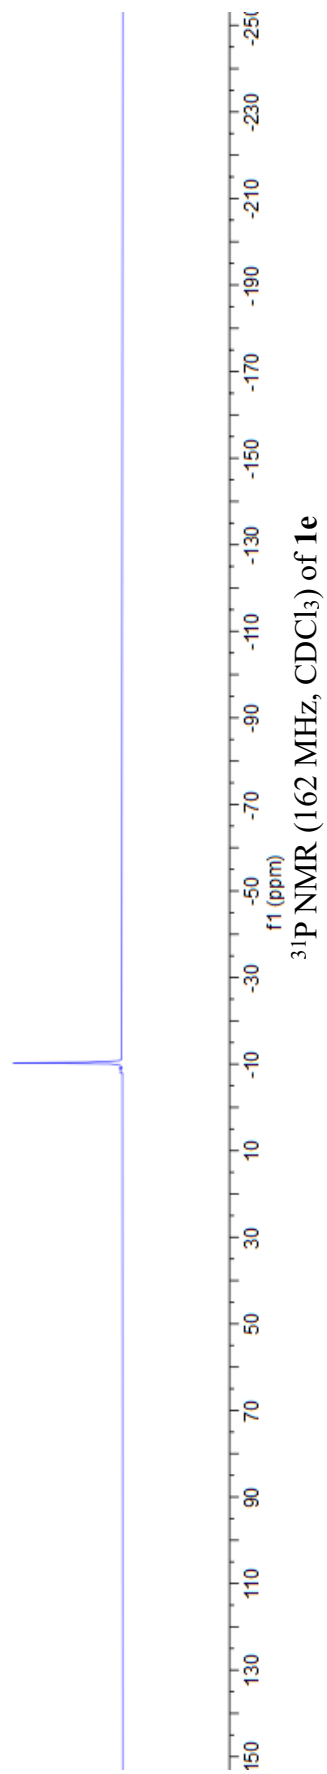

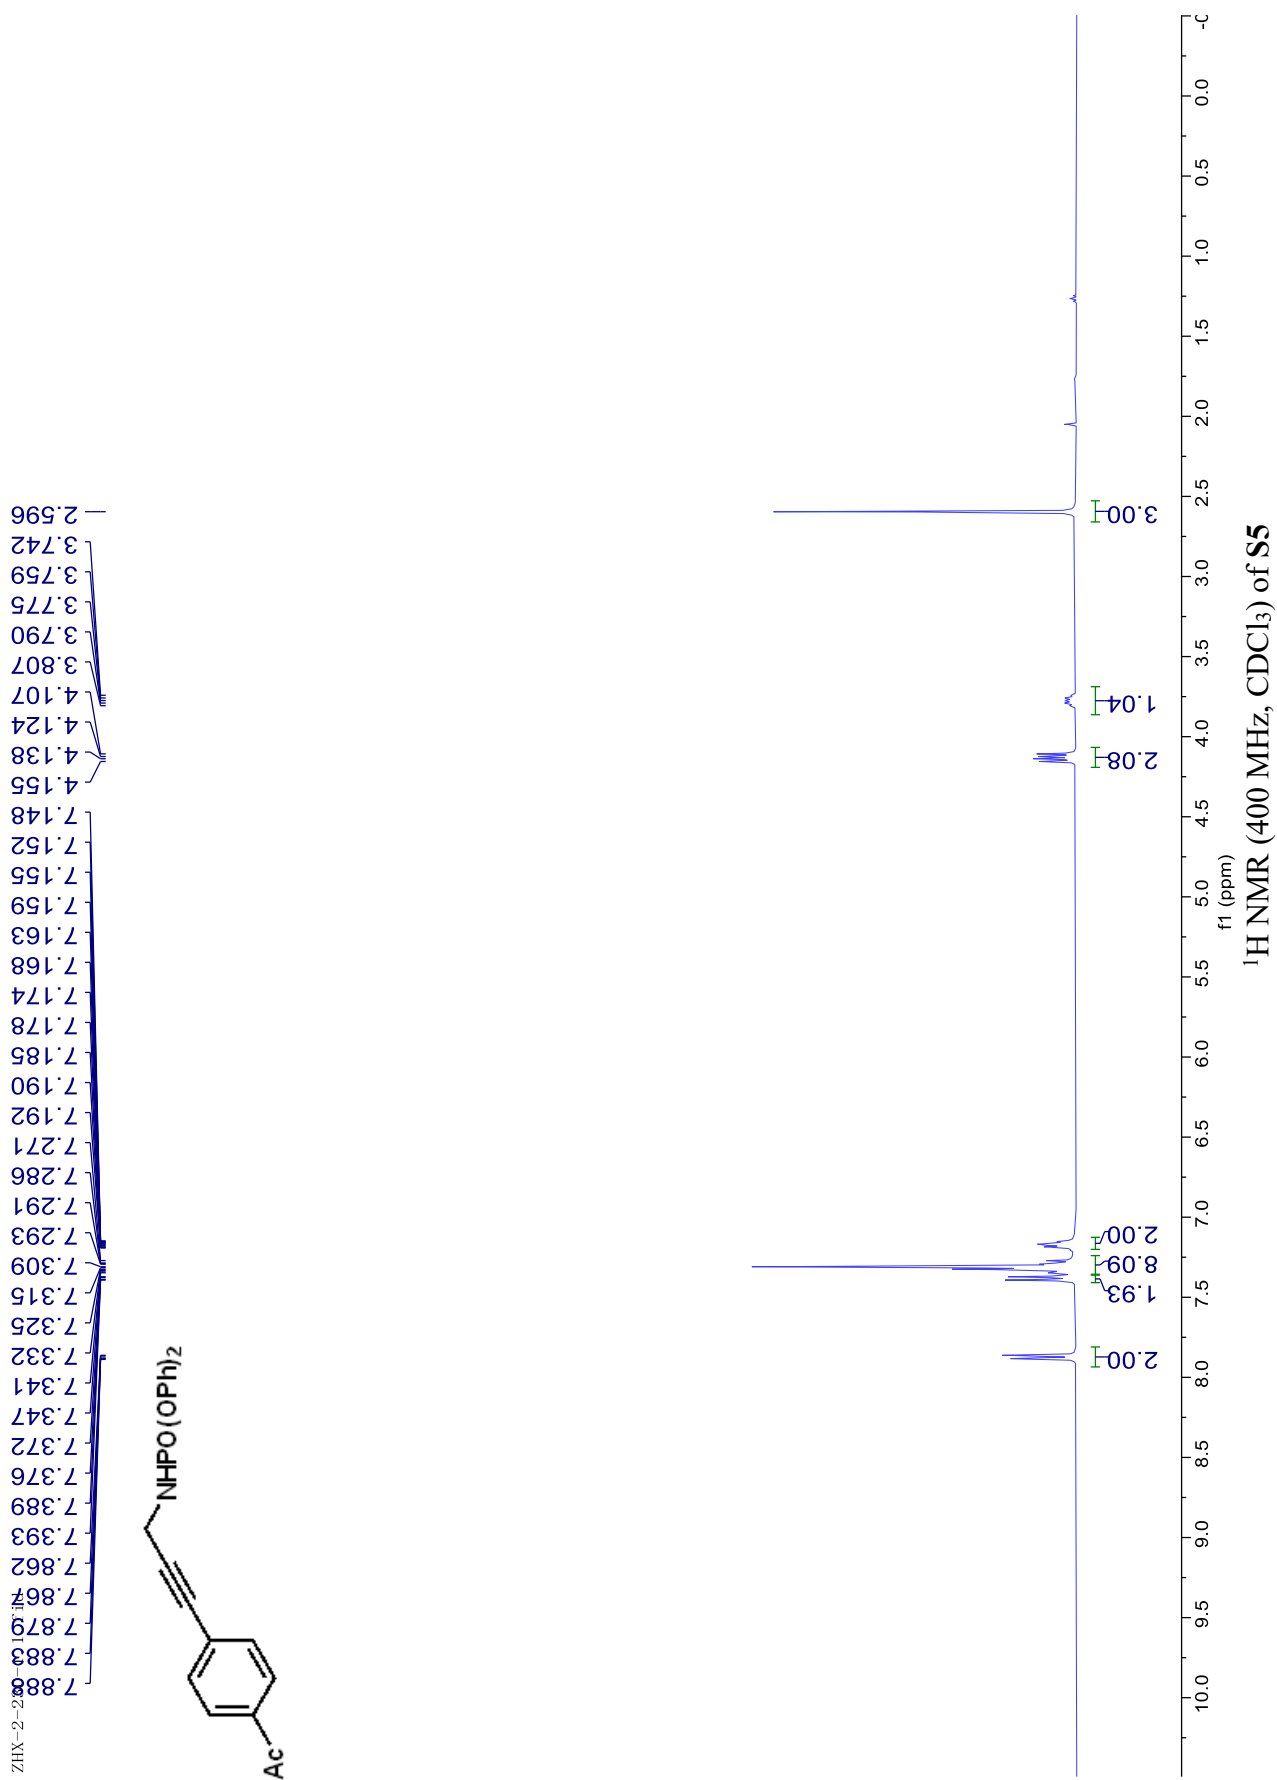



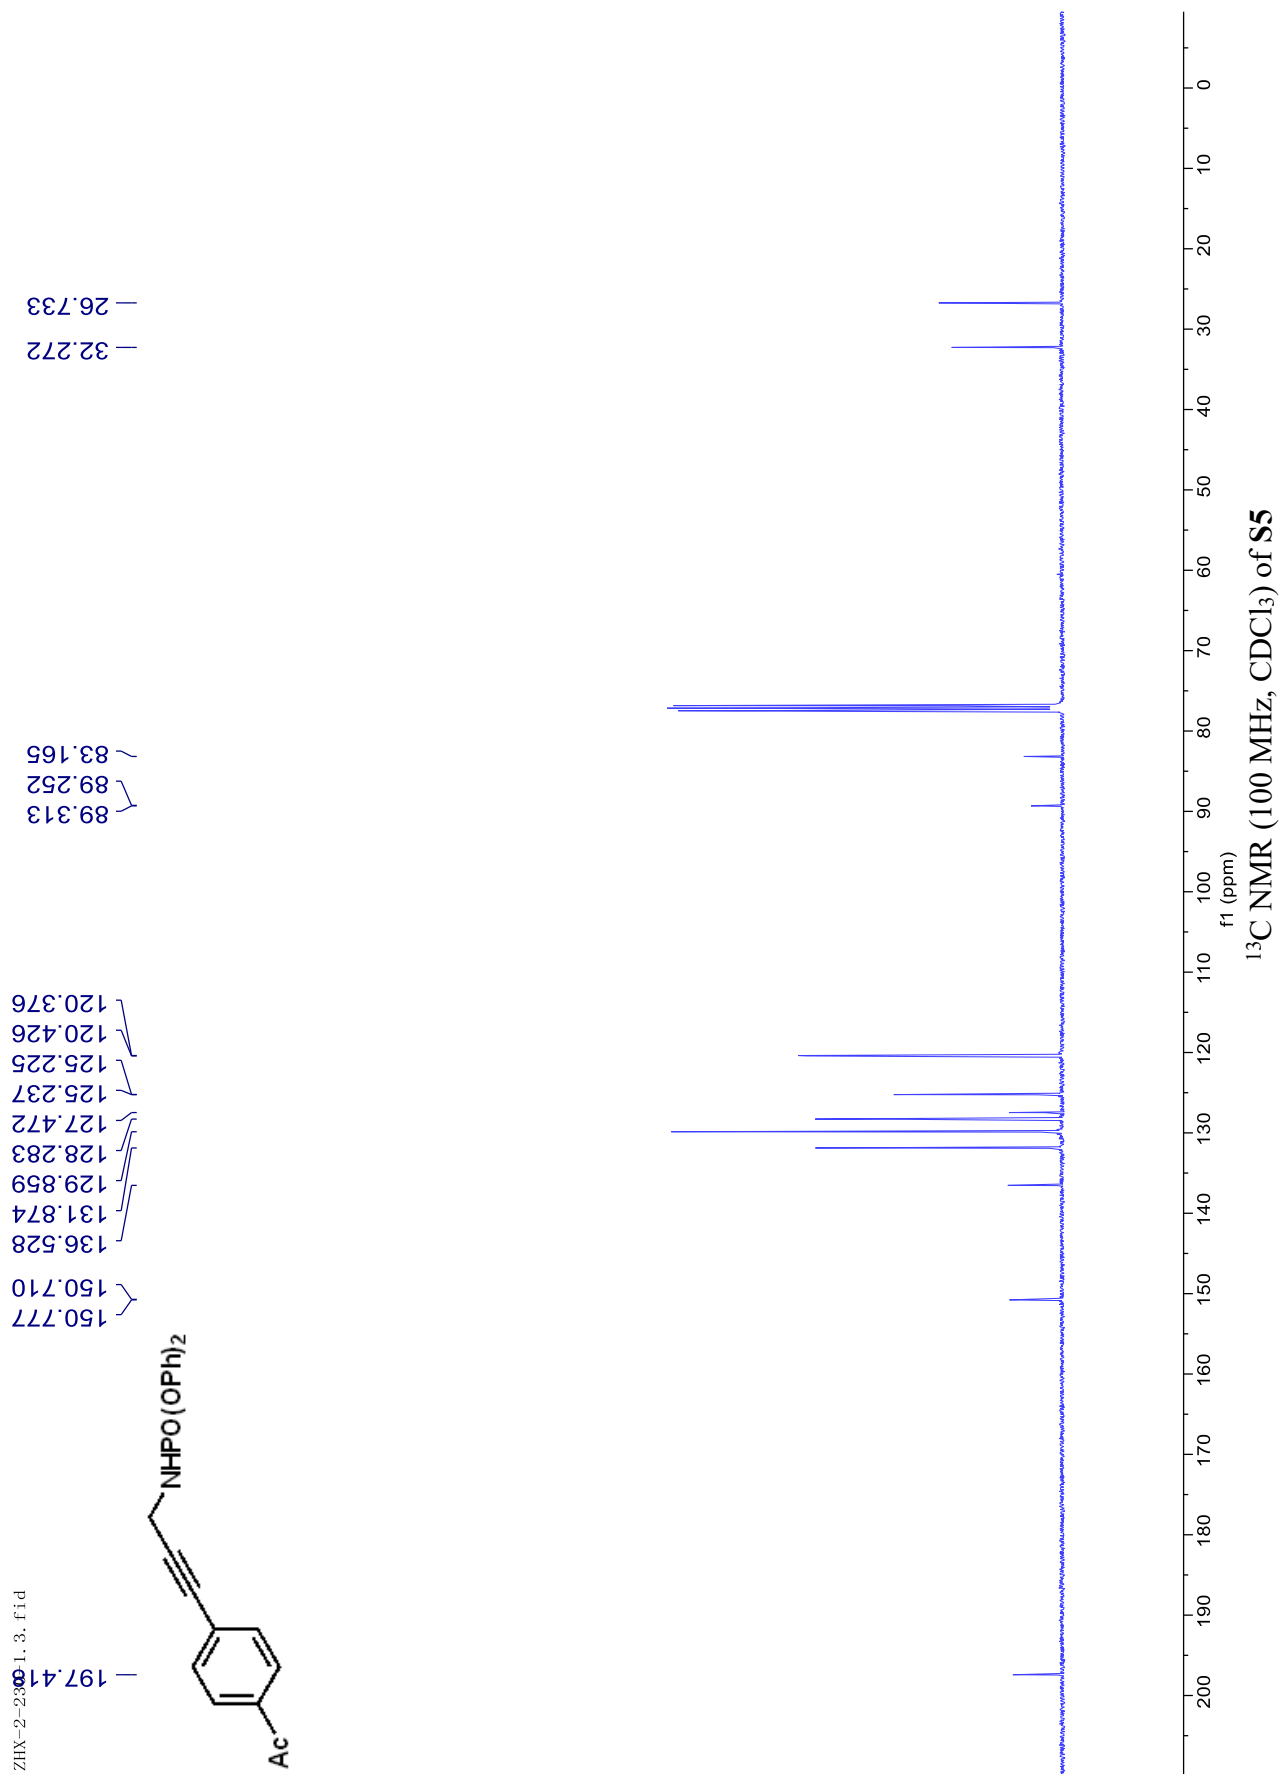

ZHX-2-230-1. 2. fid

-1.990

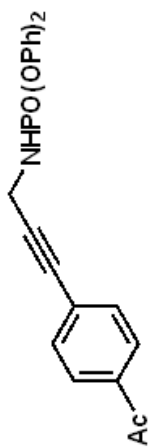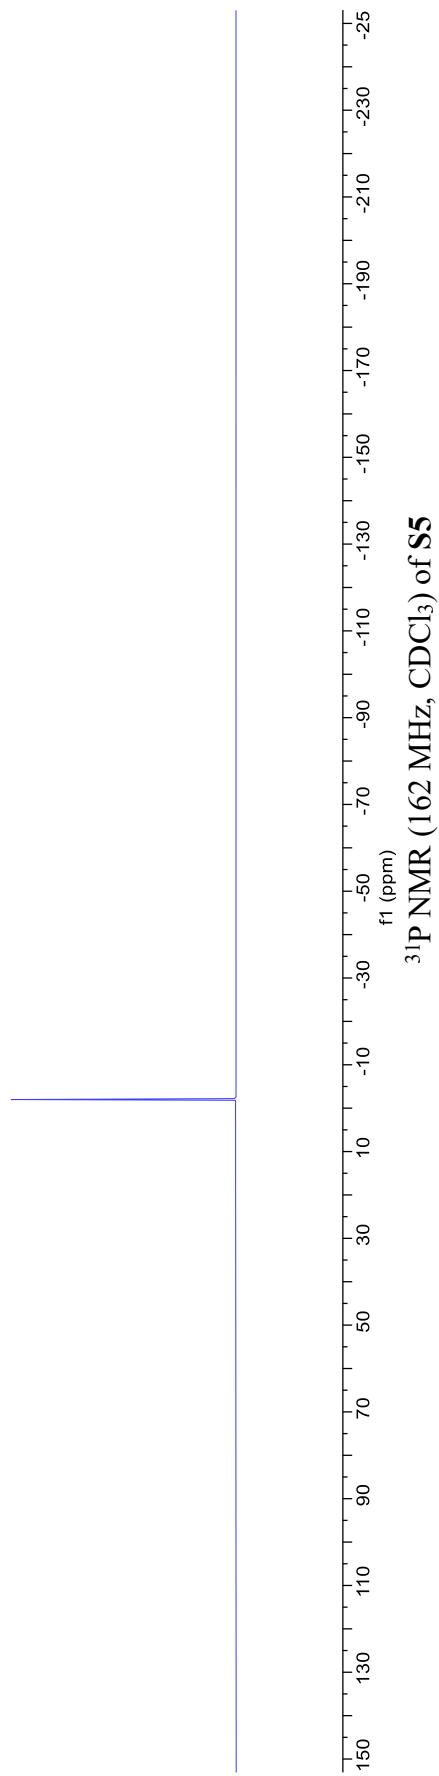

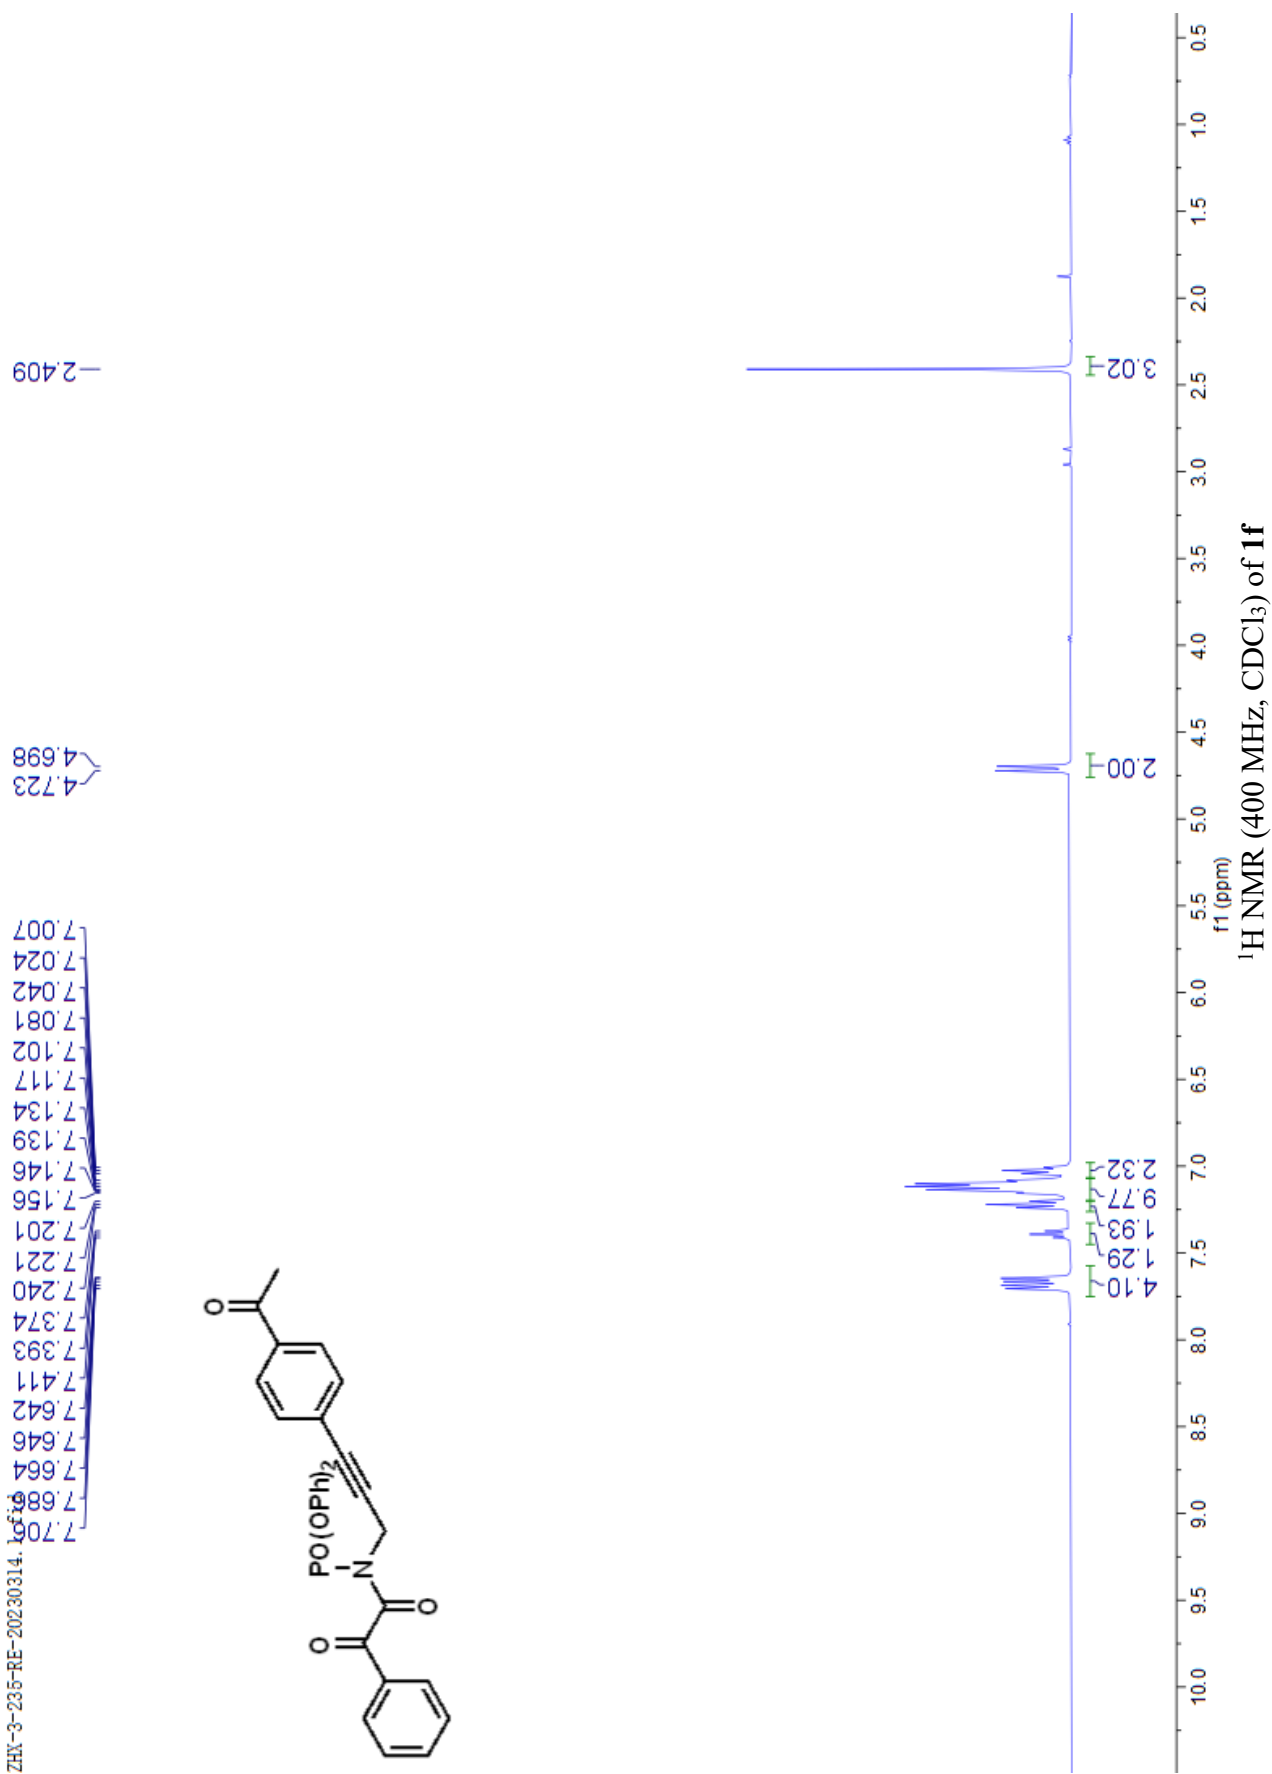

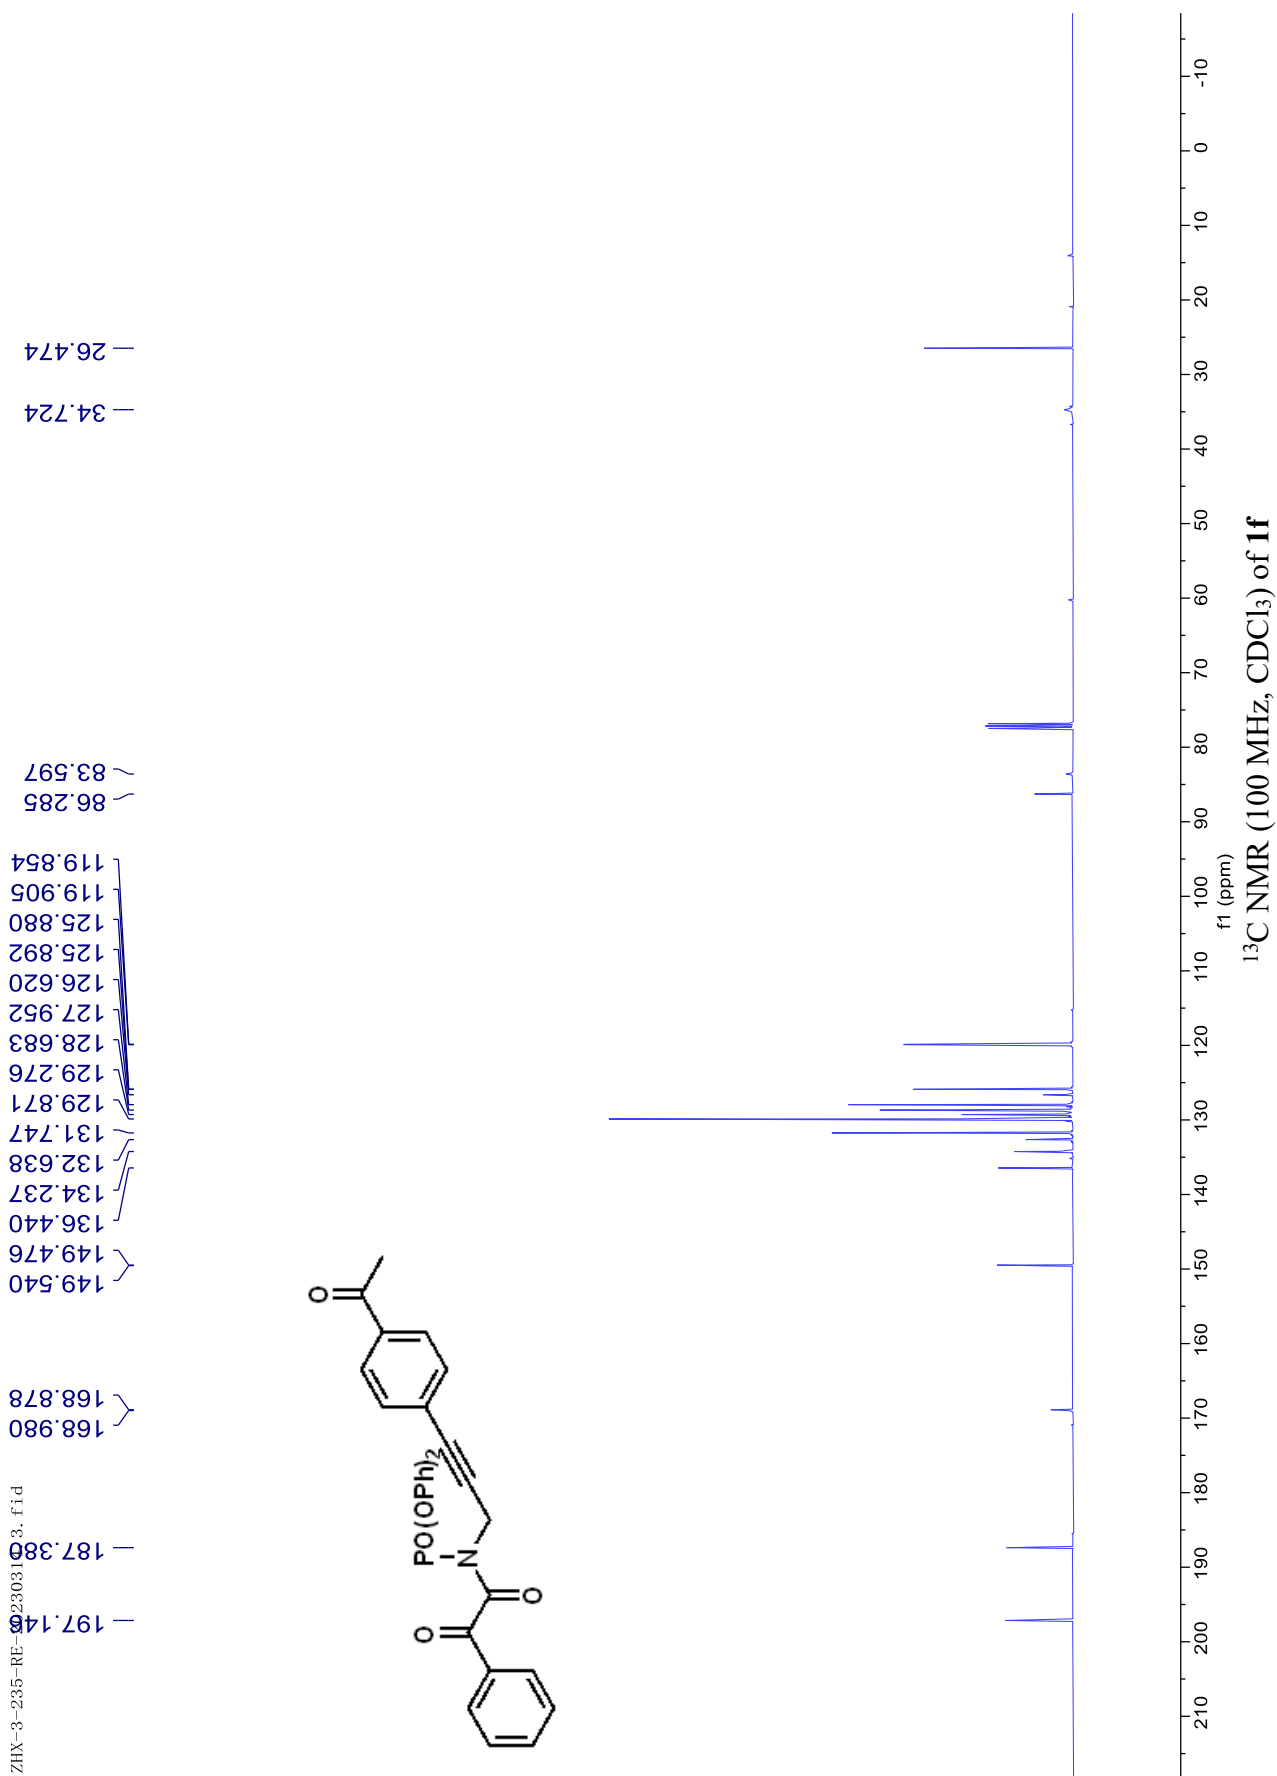

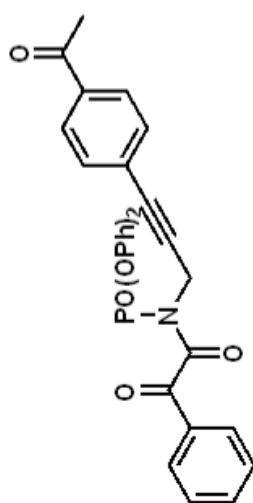

--10.431

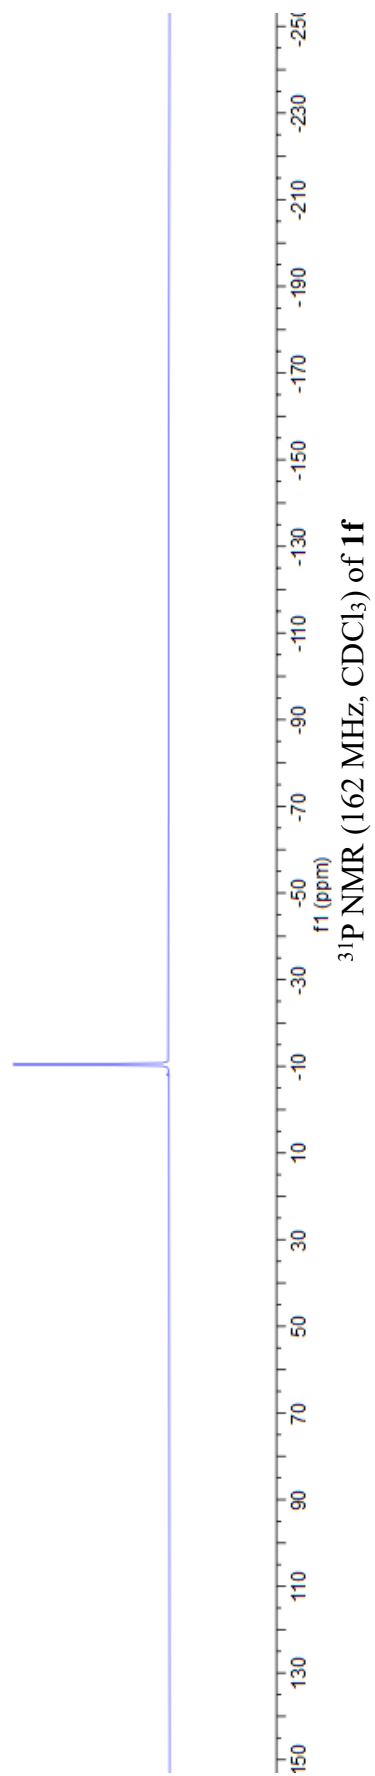

ZHX-2-269-1. 1. fid

7.879  
7.874  
7.861  
7.858  
7.279  
7.273  
7.258  
7.236  
7.226  
7.220  
7.204  
7.116  
7.111  
7.100  
7.094  
7.086  
7.079  
7.073  
7.064  
7.061  
7.057  
7.049  
7.044  
4.060  
4.044  
4.030  
4.013  
3.835  
3.737  
3.726  
3.712  
3.692  
3.677  
3.663  
3.648

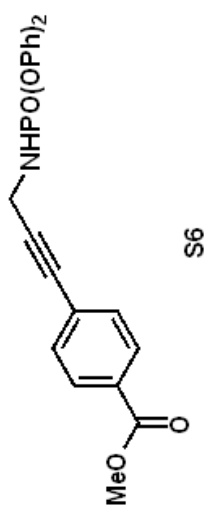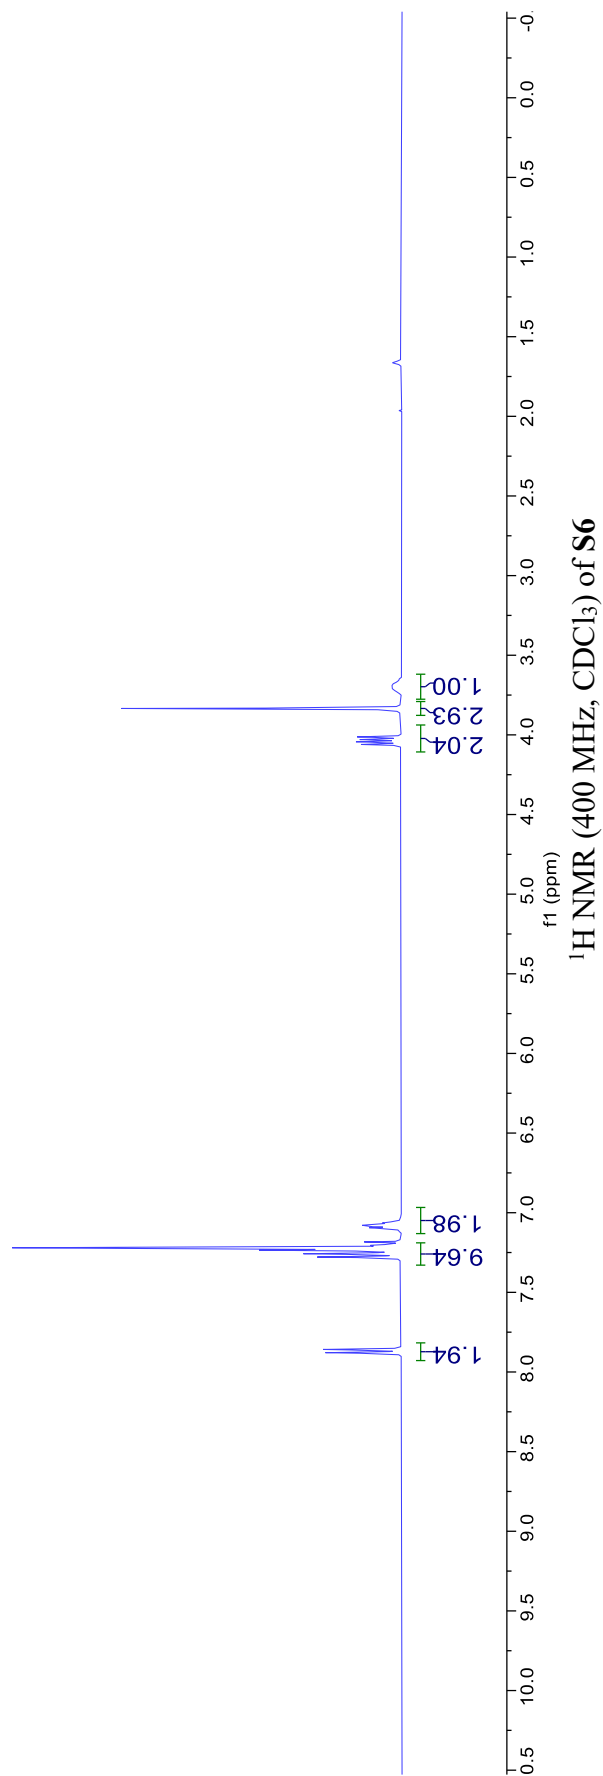

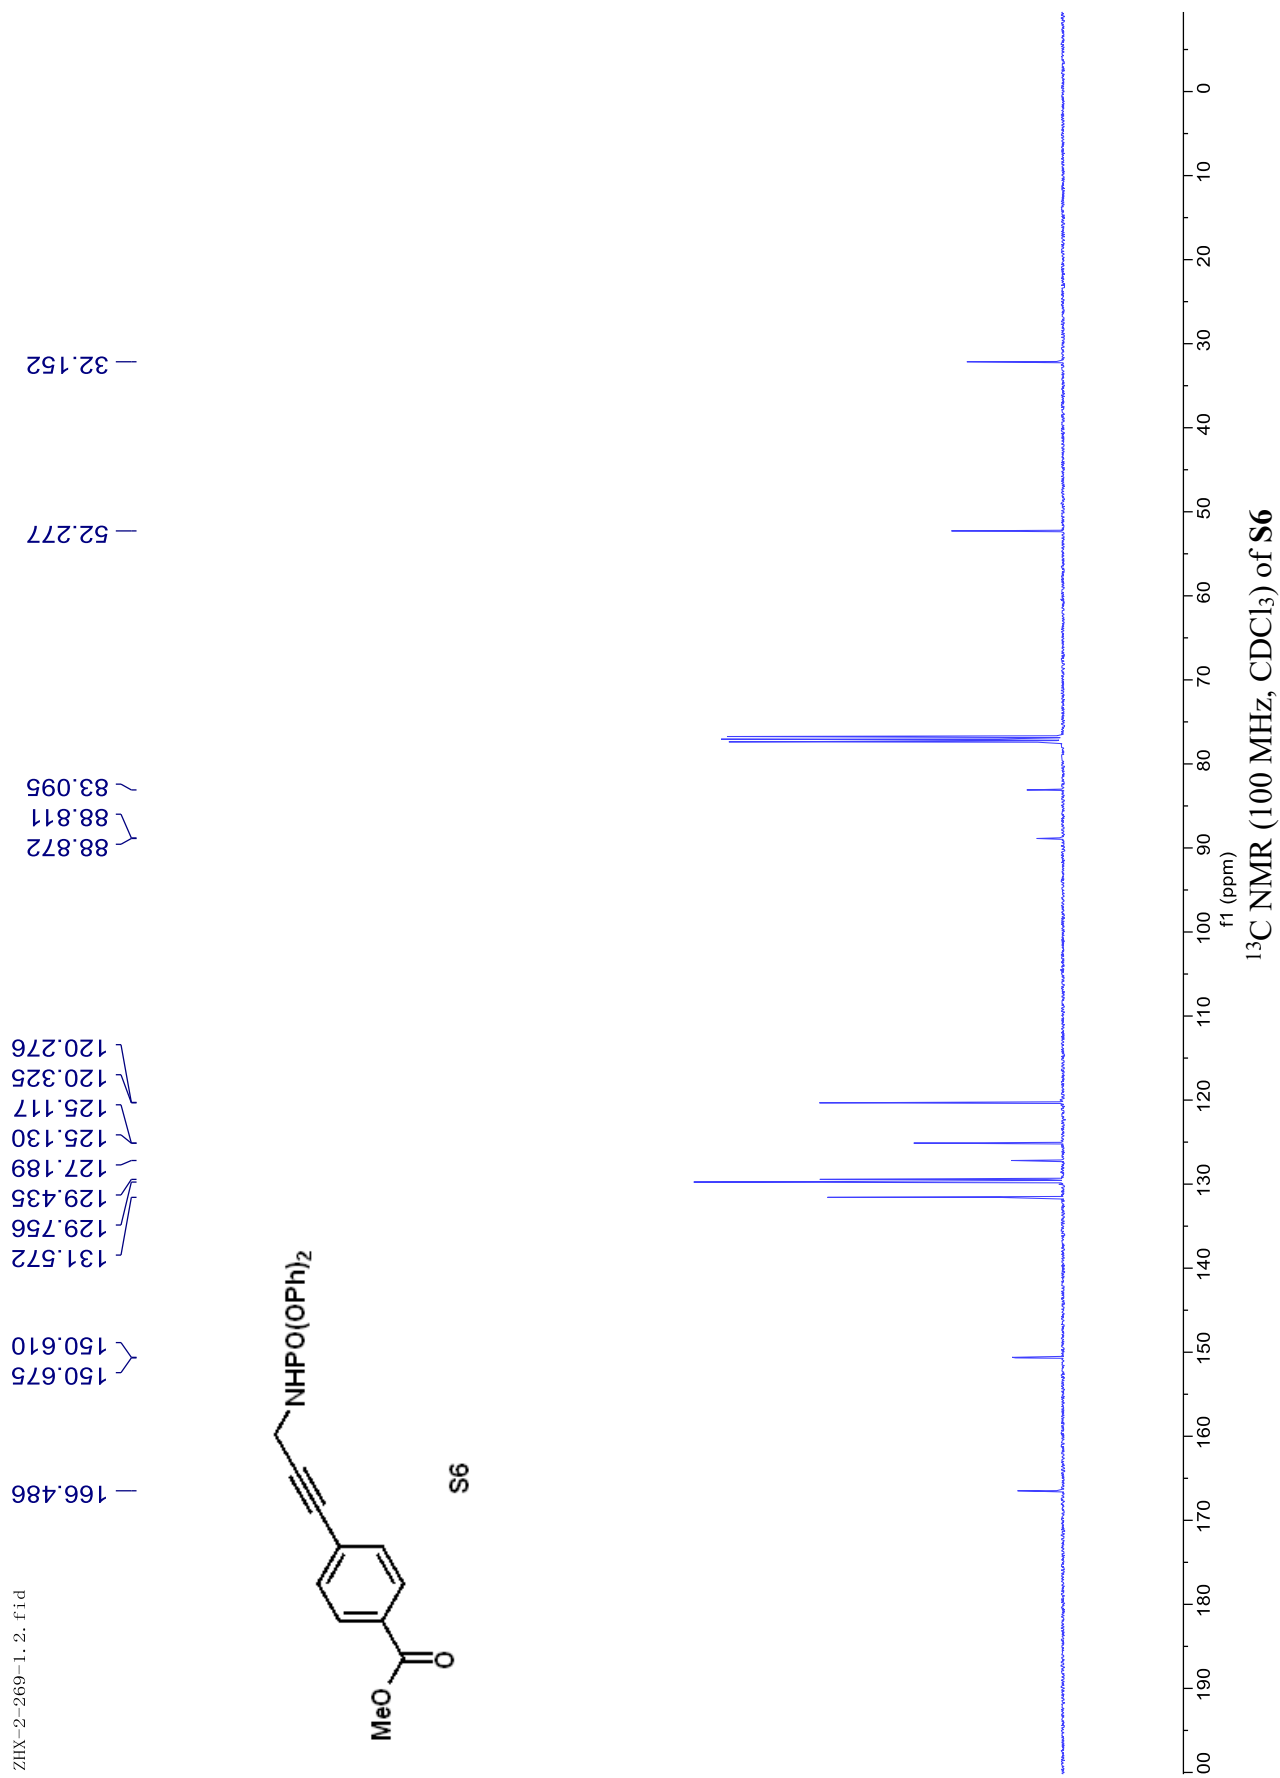

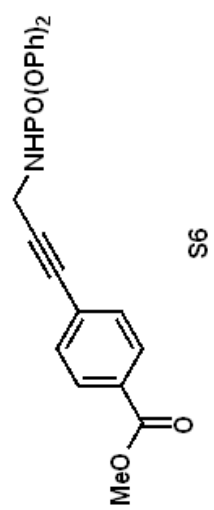

-1.932

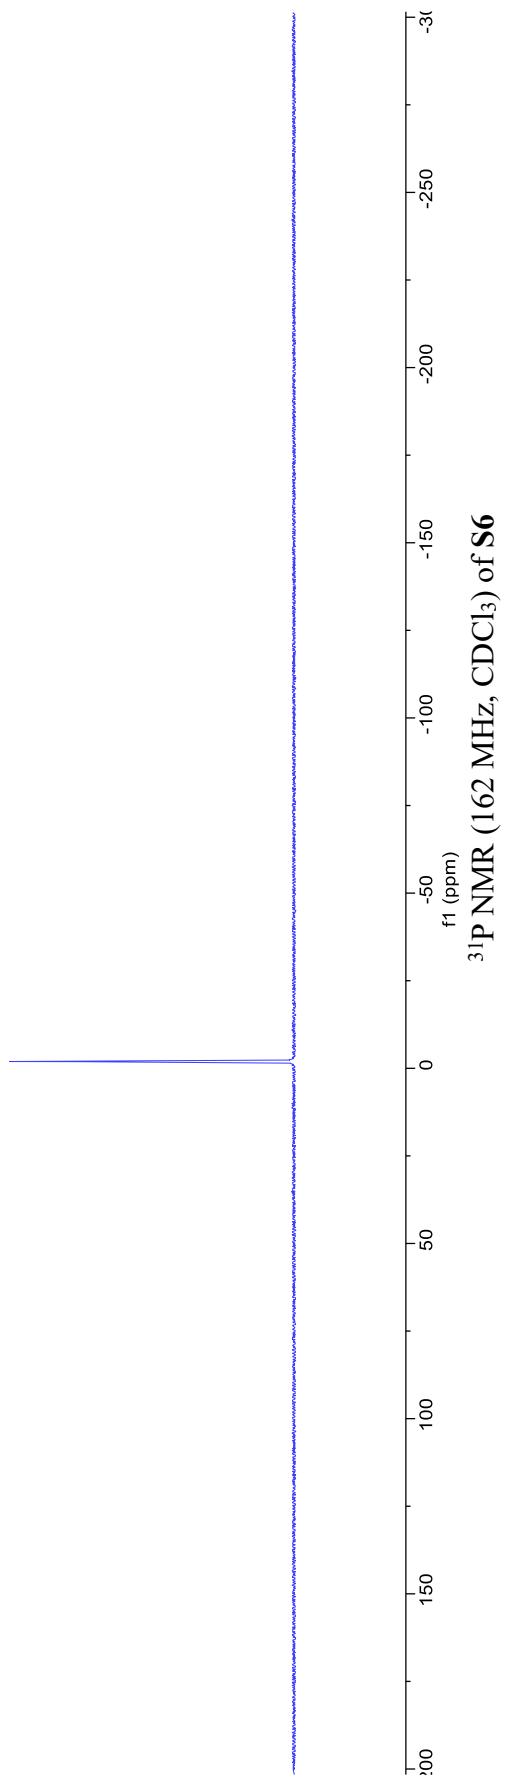



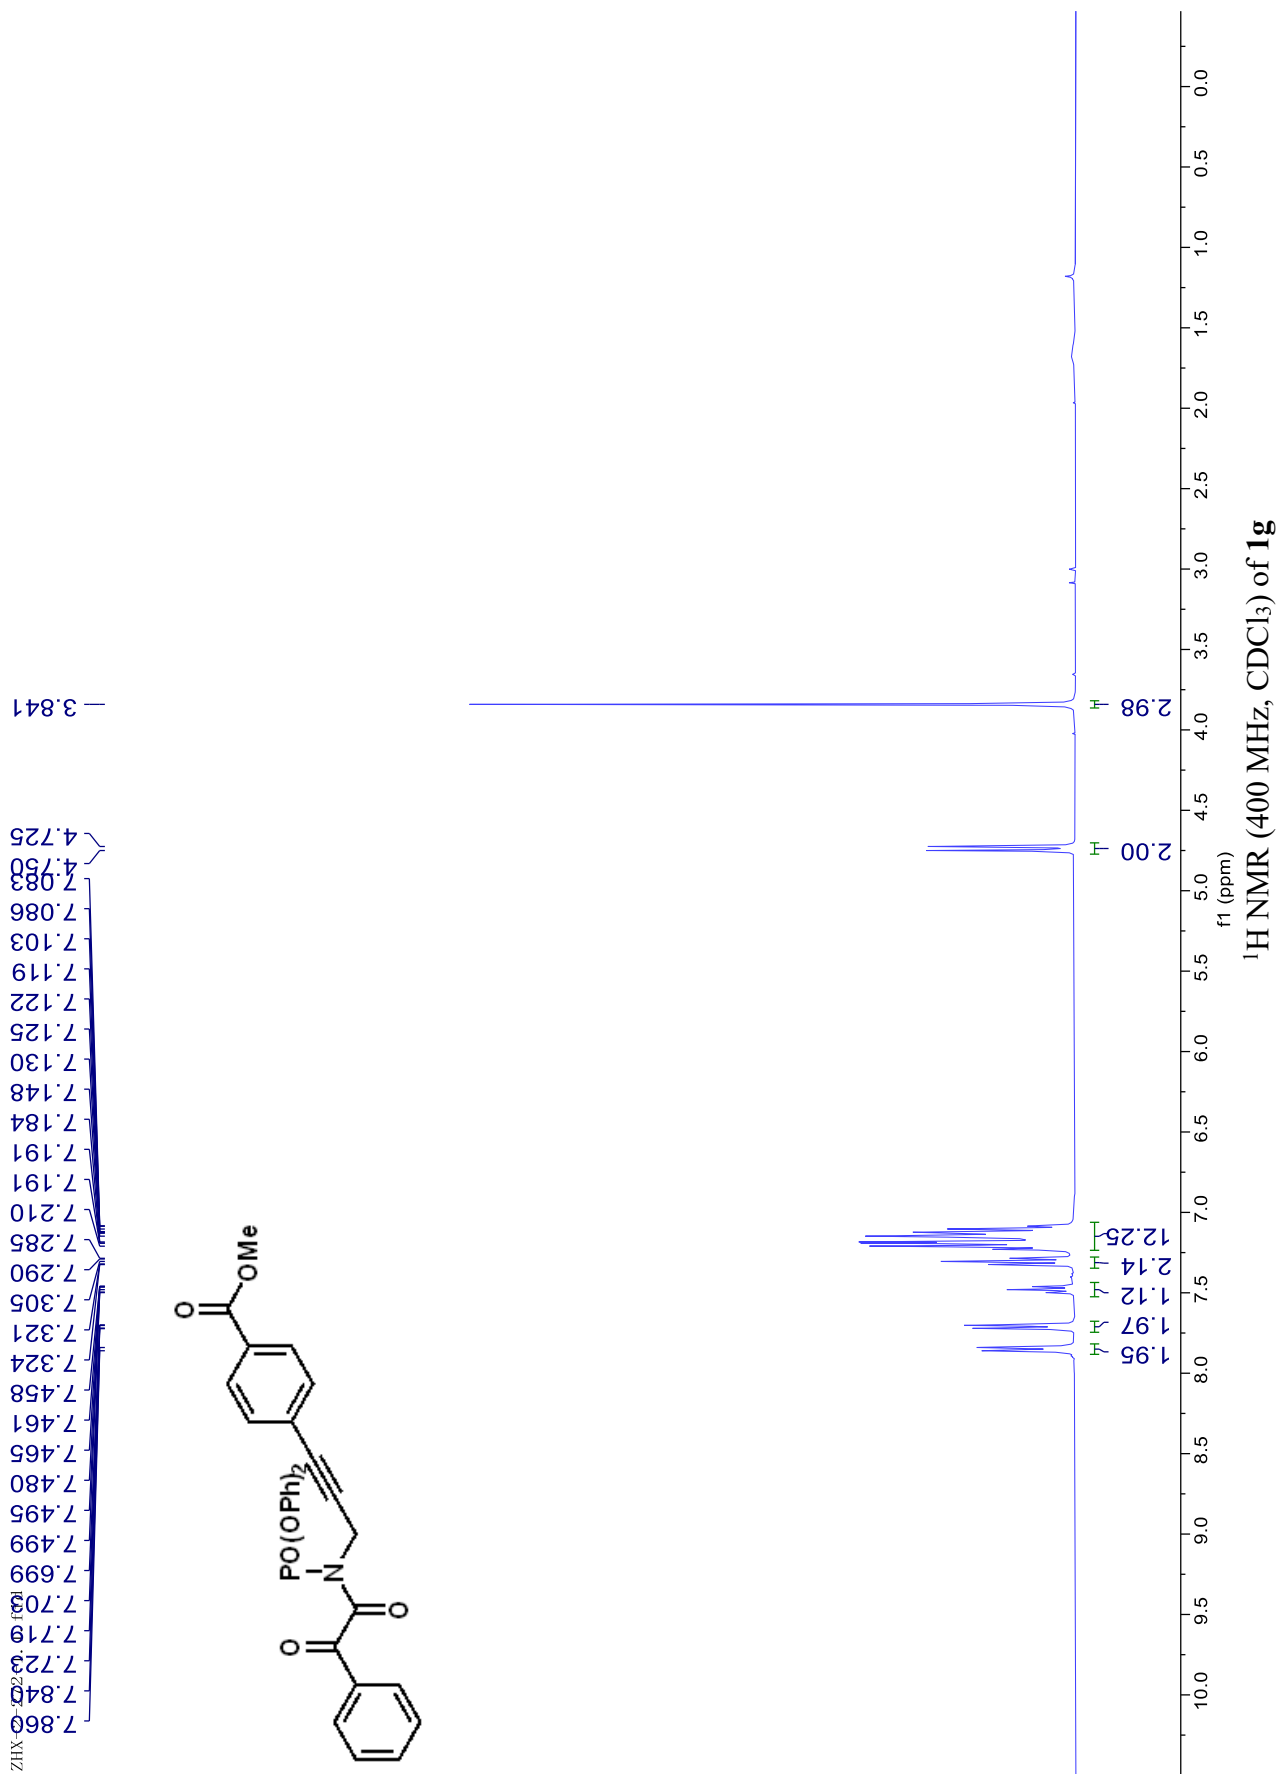

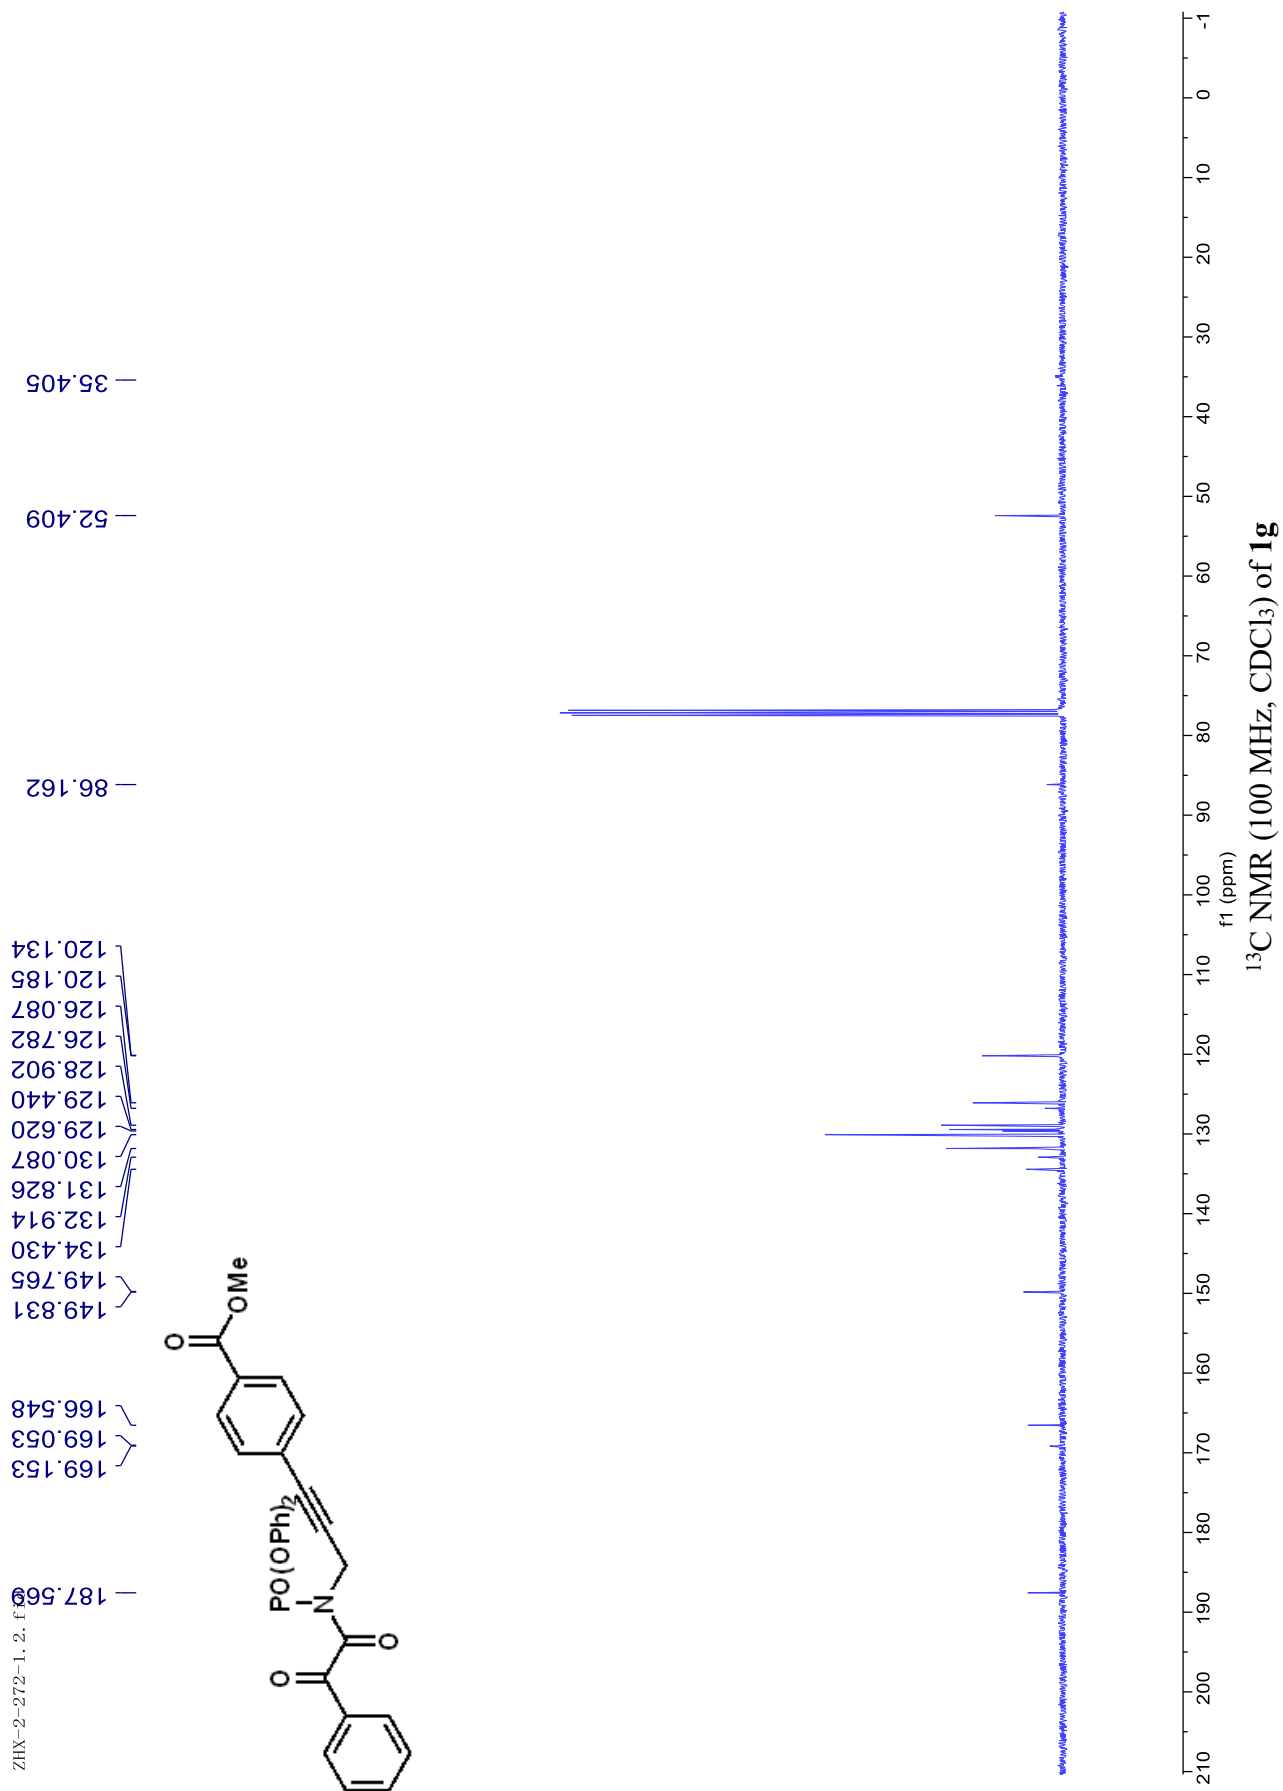

--10.053

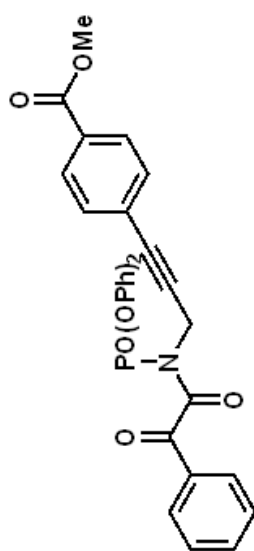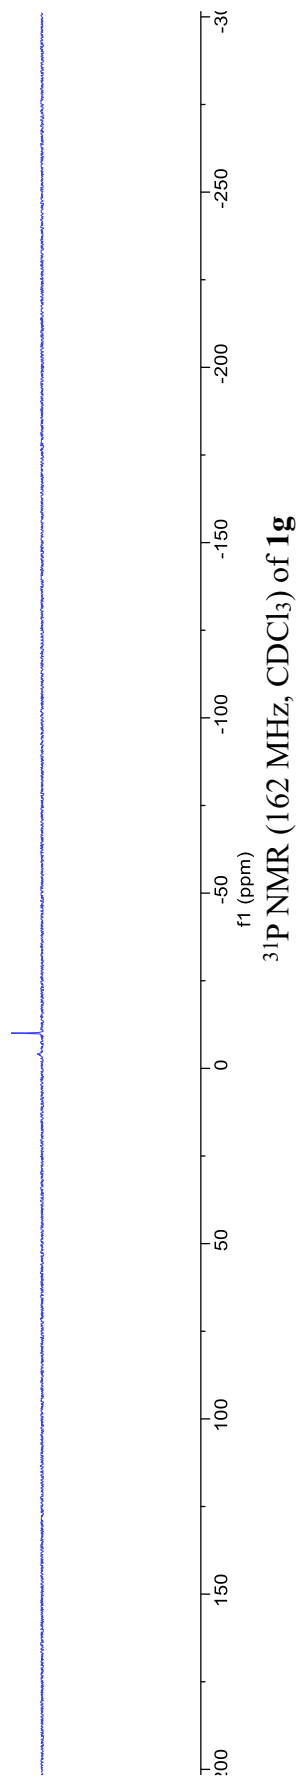

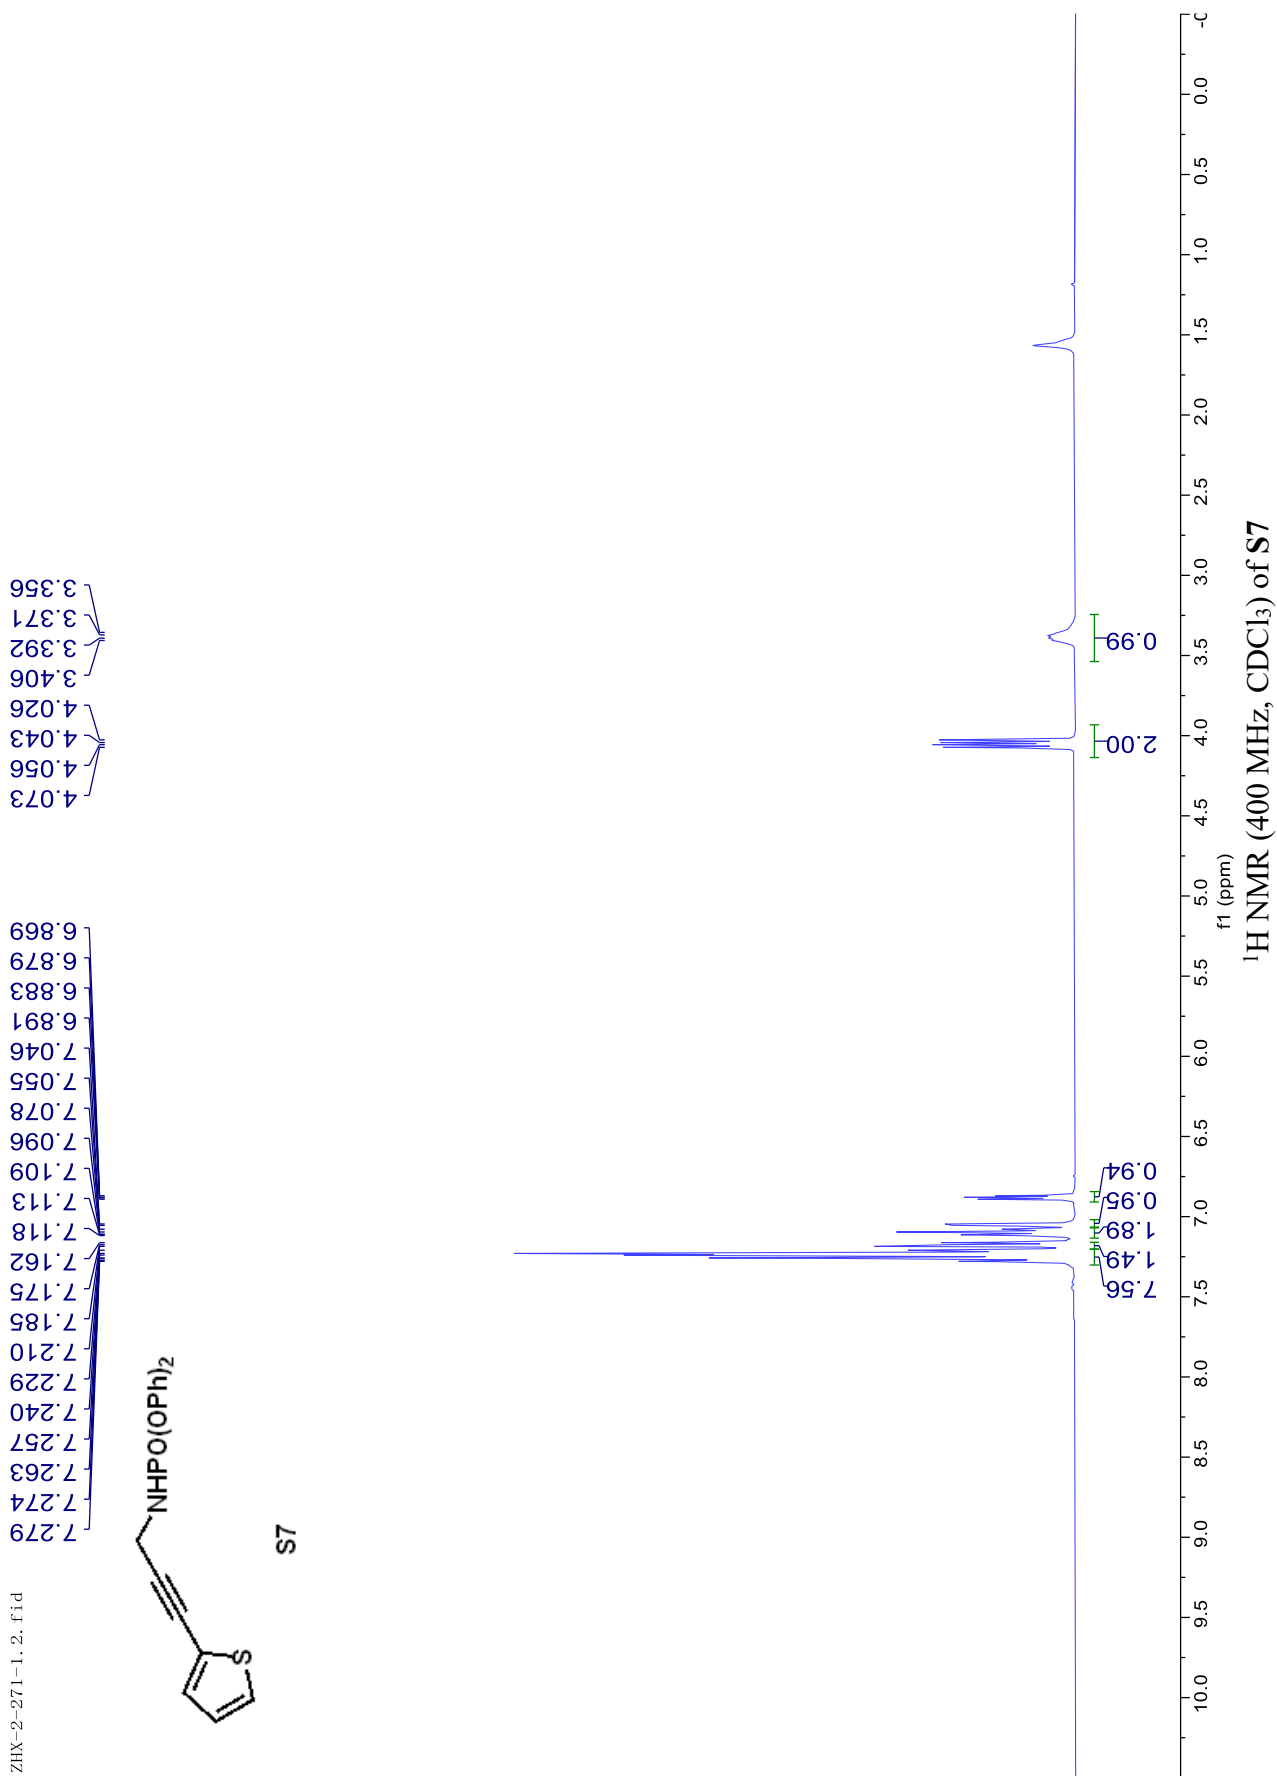

ZHX-2-271-1\_3.fid

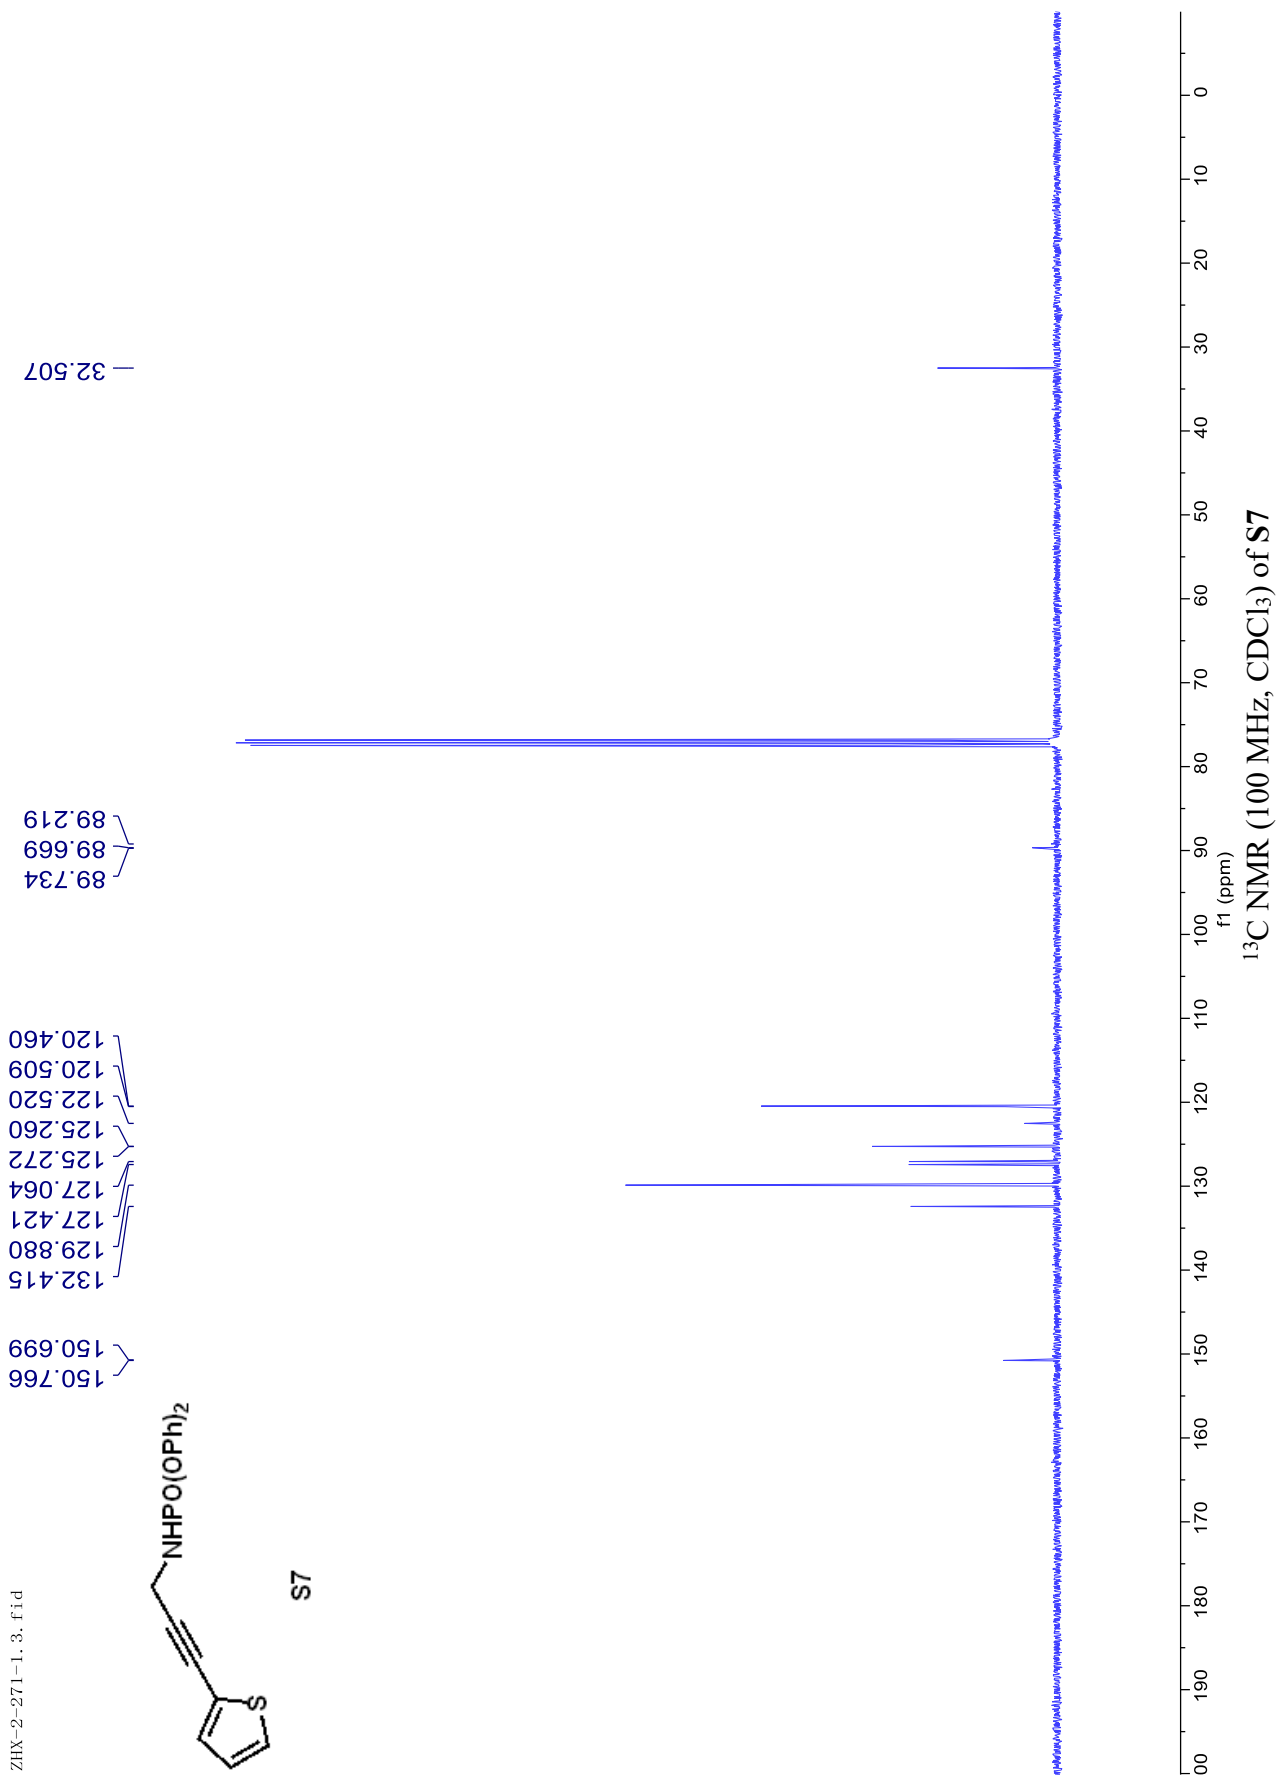

ZHX-2-271.1.fid

-2.001

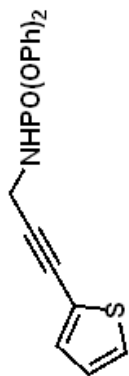

S7

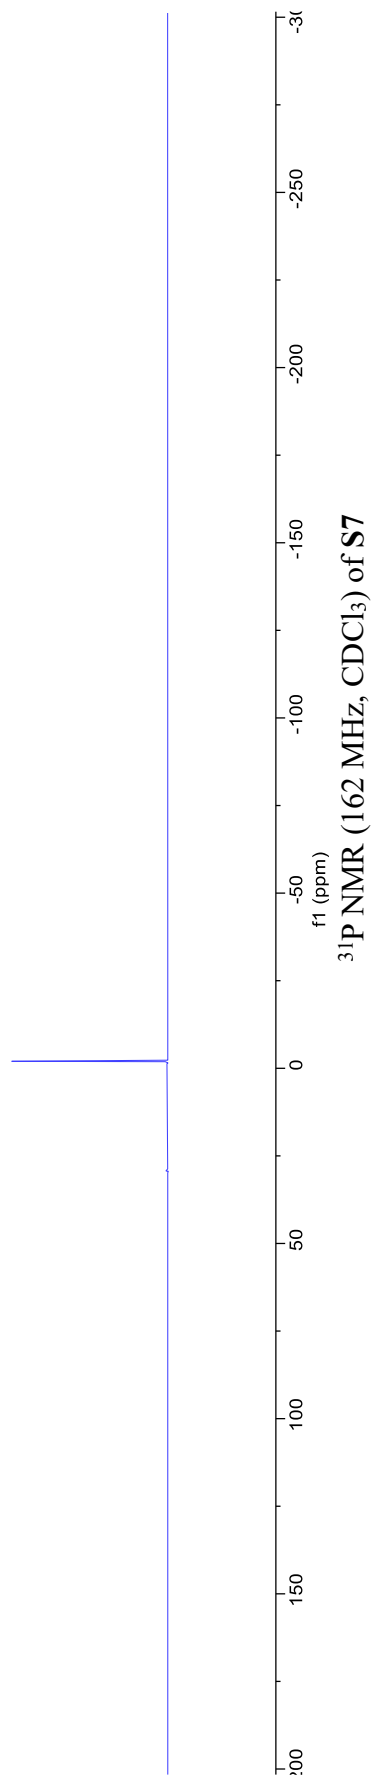

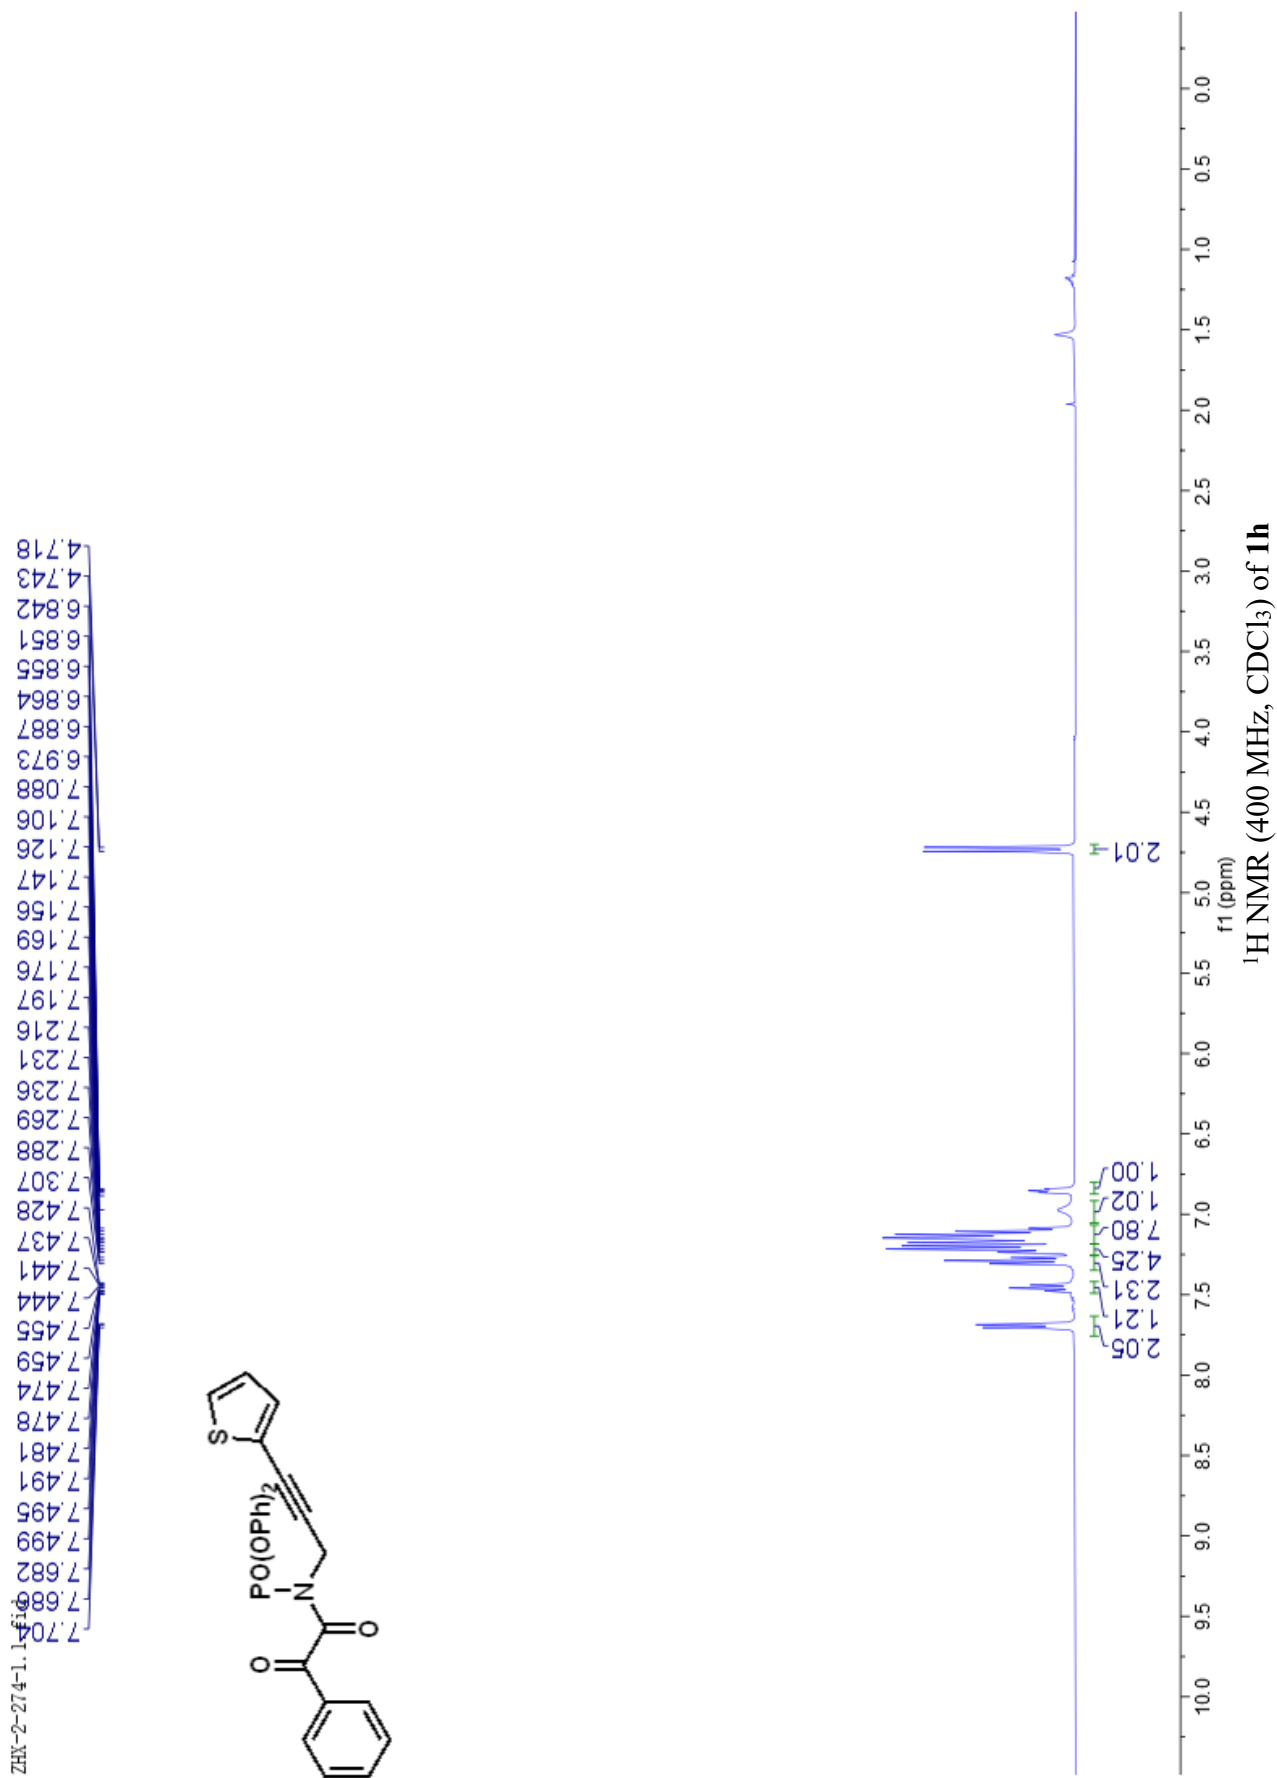

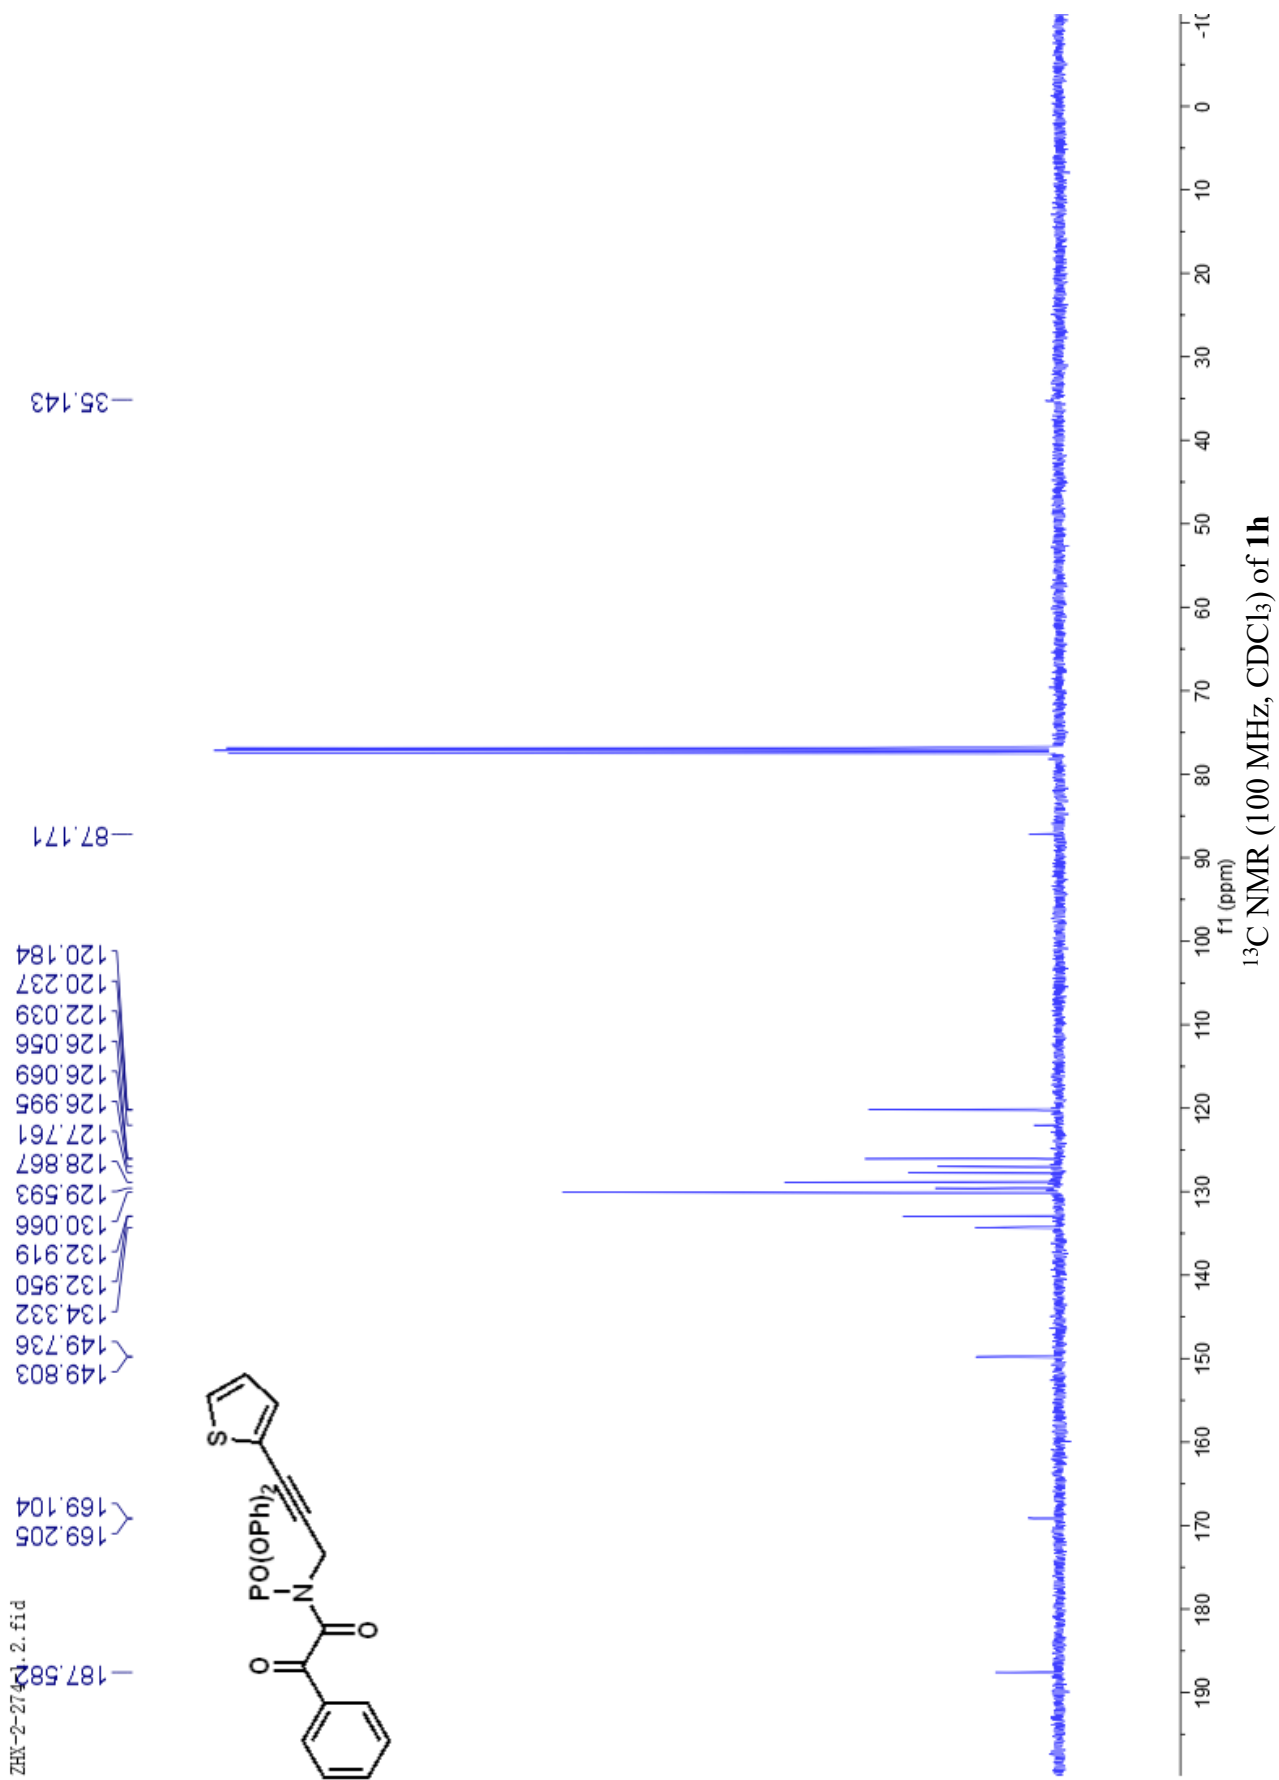



ZHY-2-274.1.fid

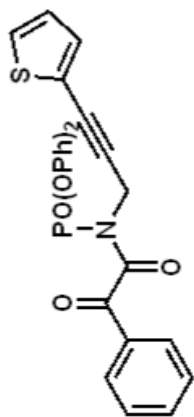

--12.950

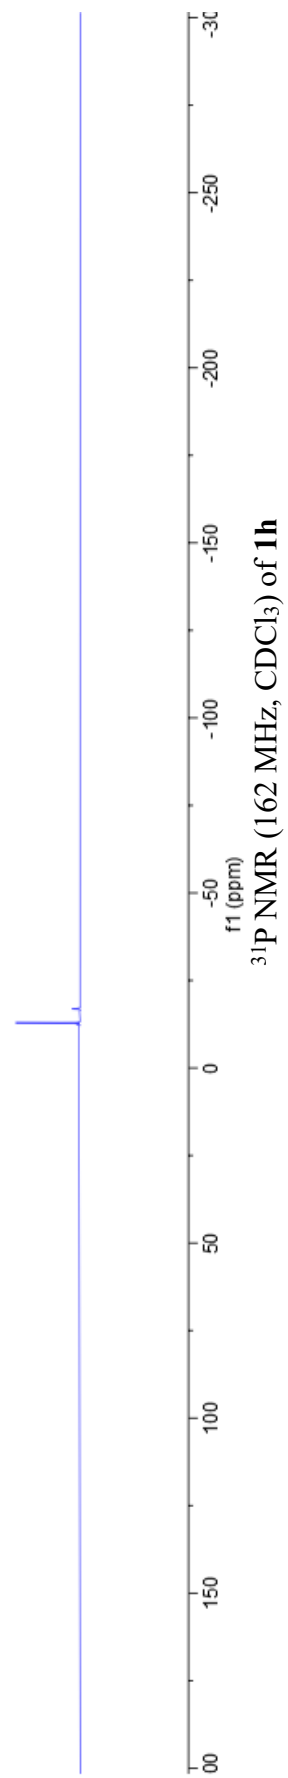

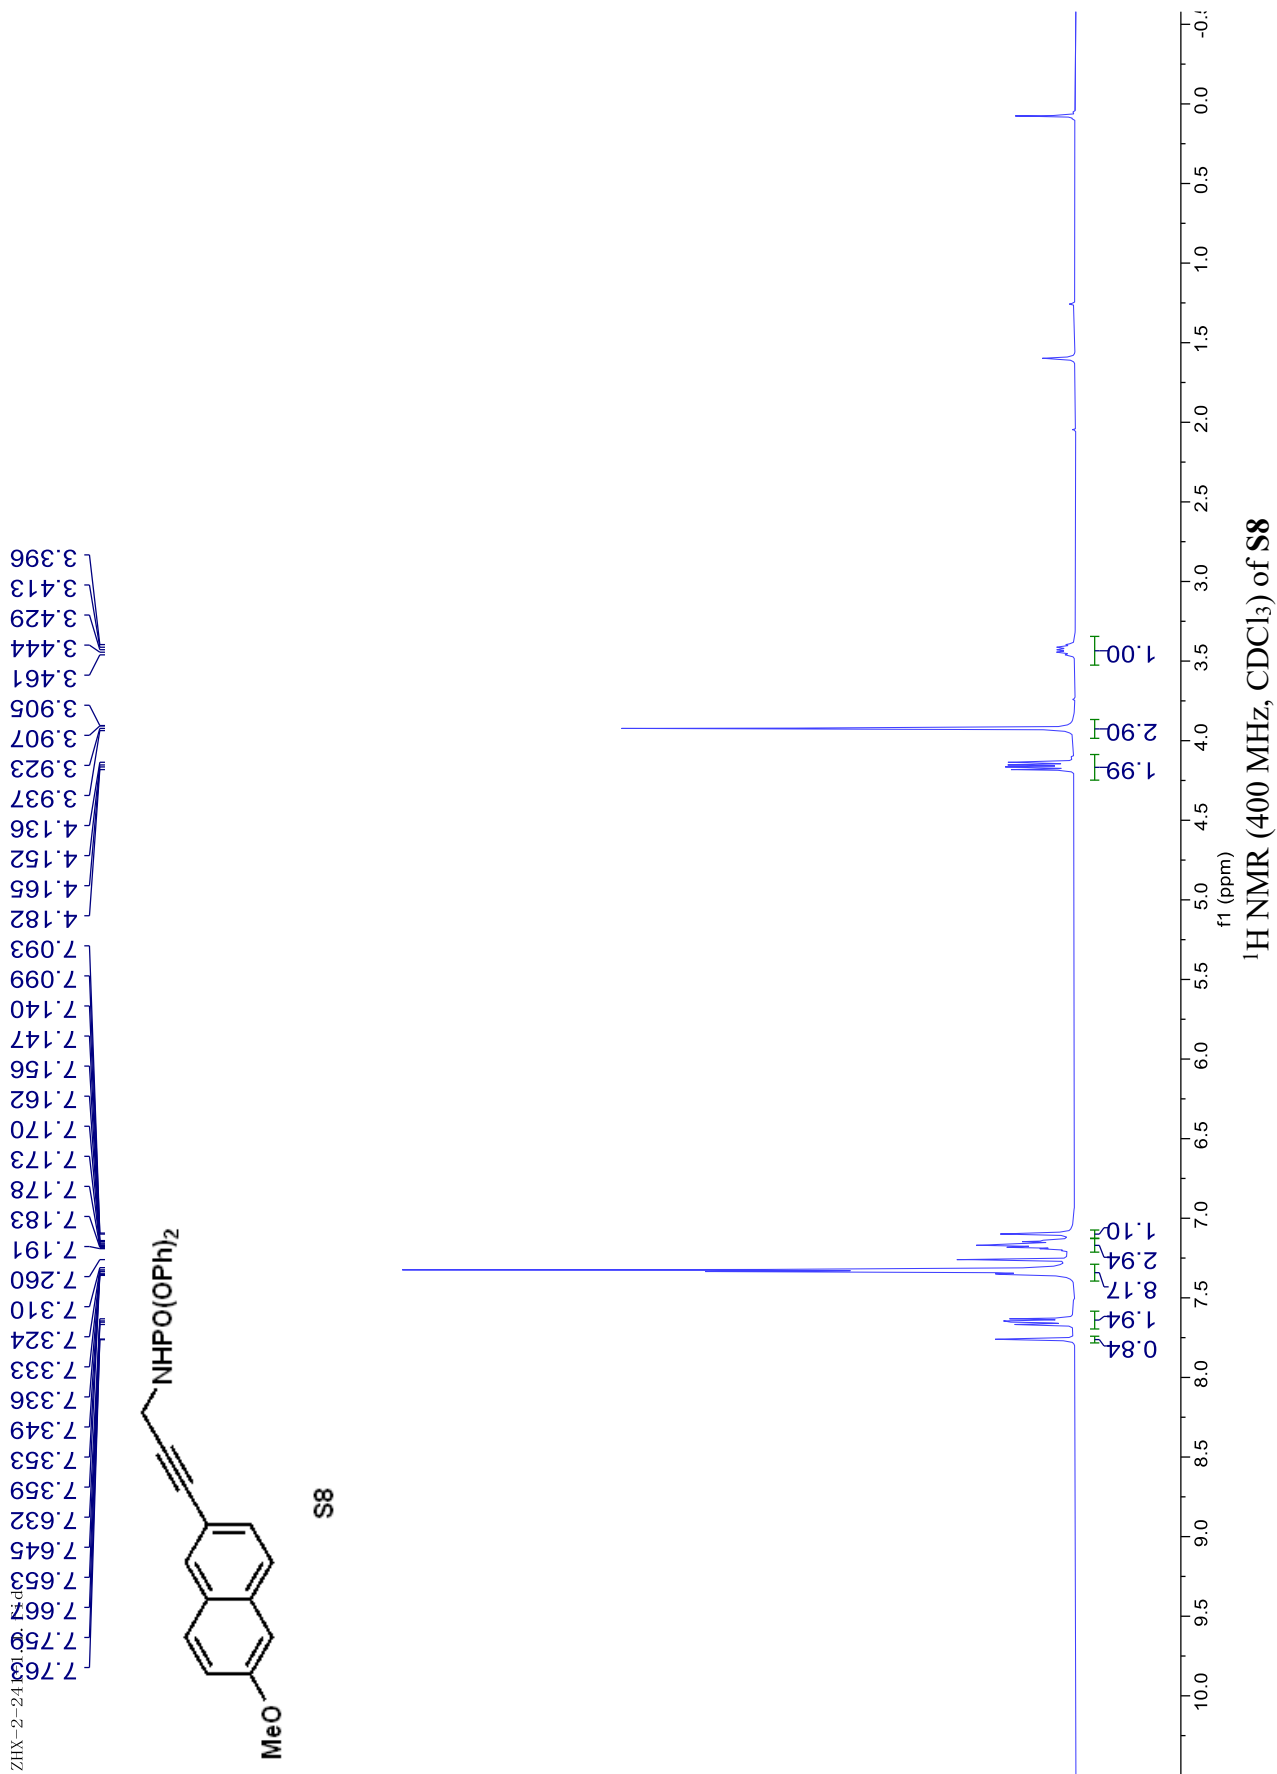

ZHX-2-241-1-2.fid

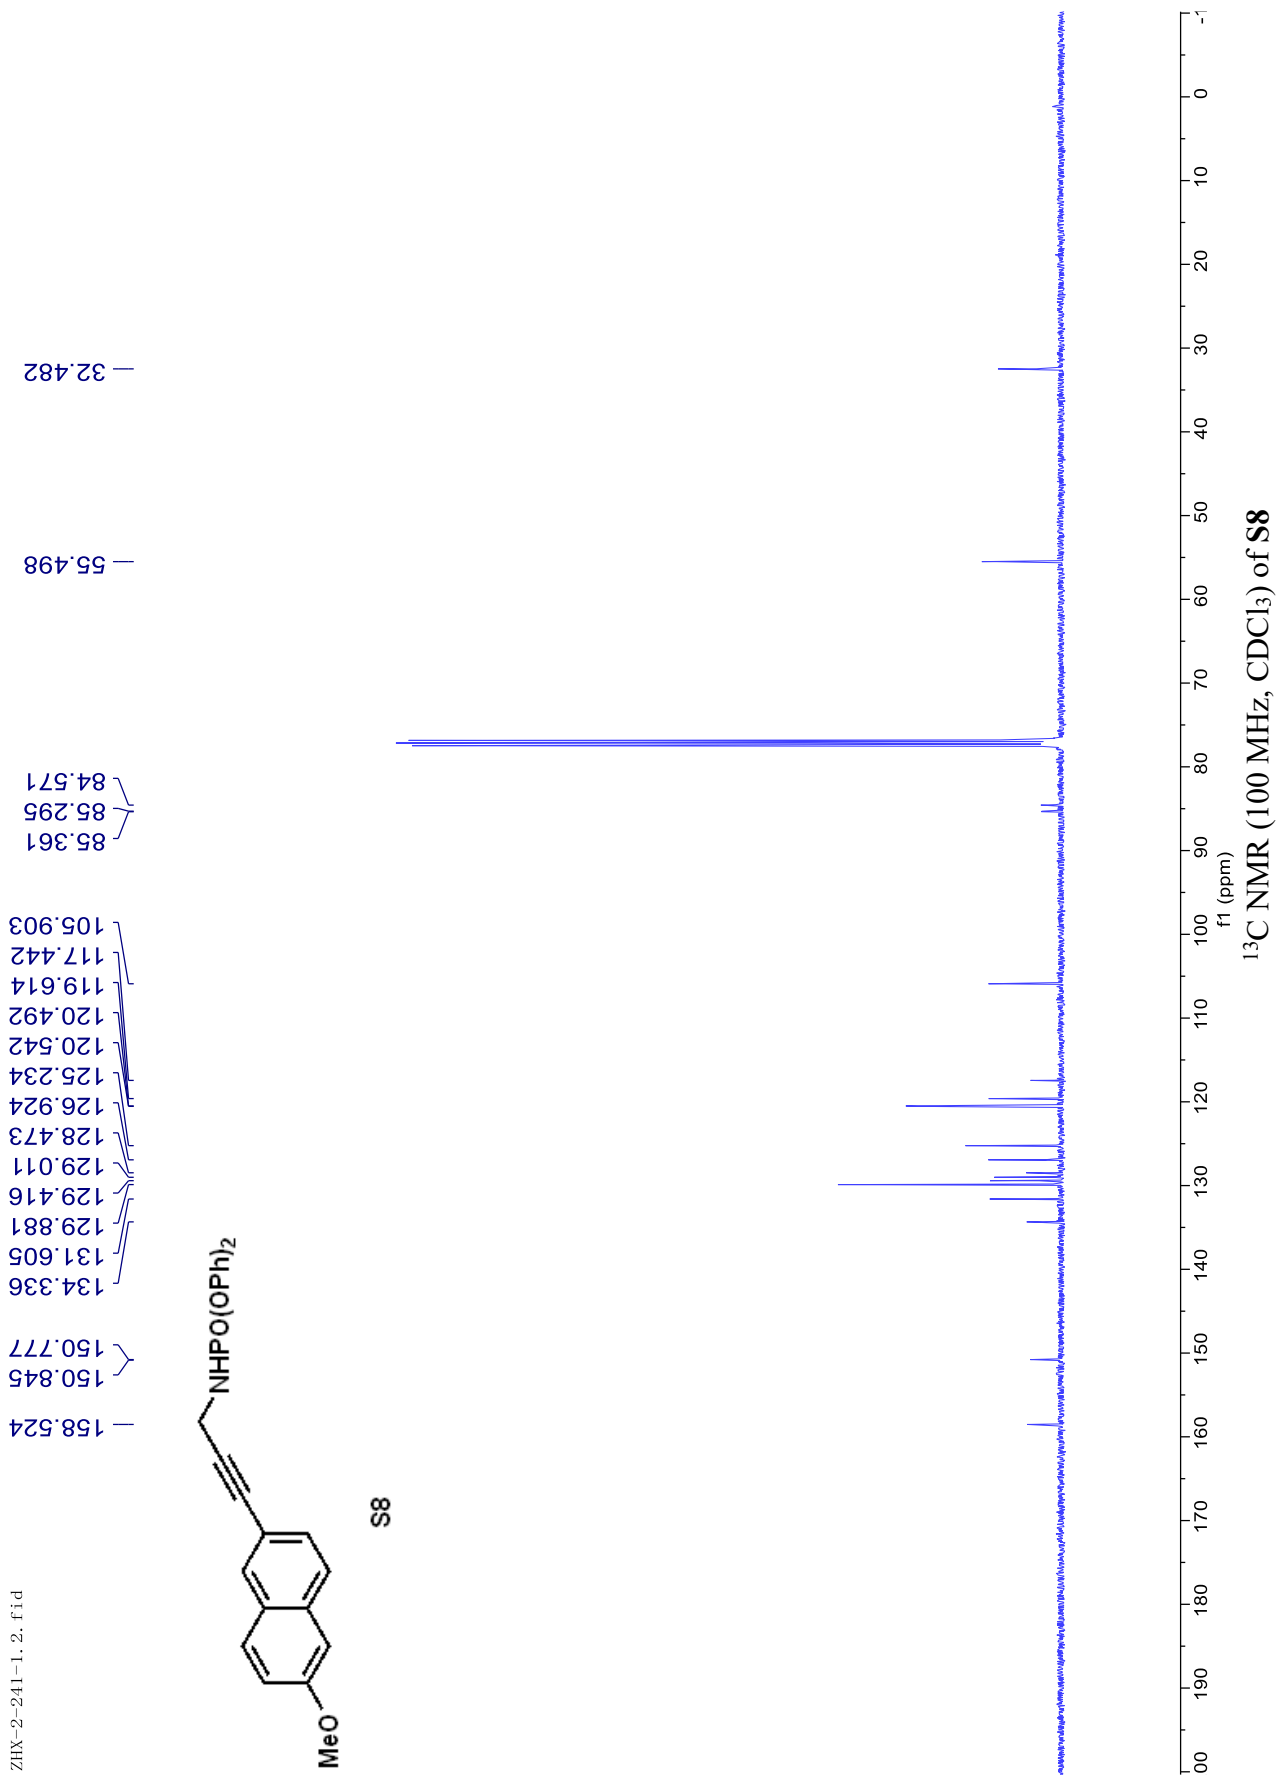



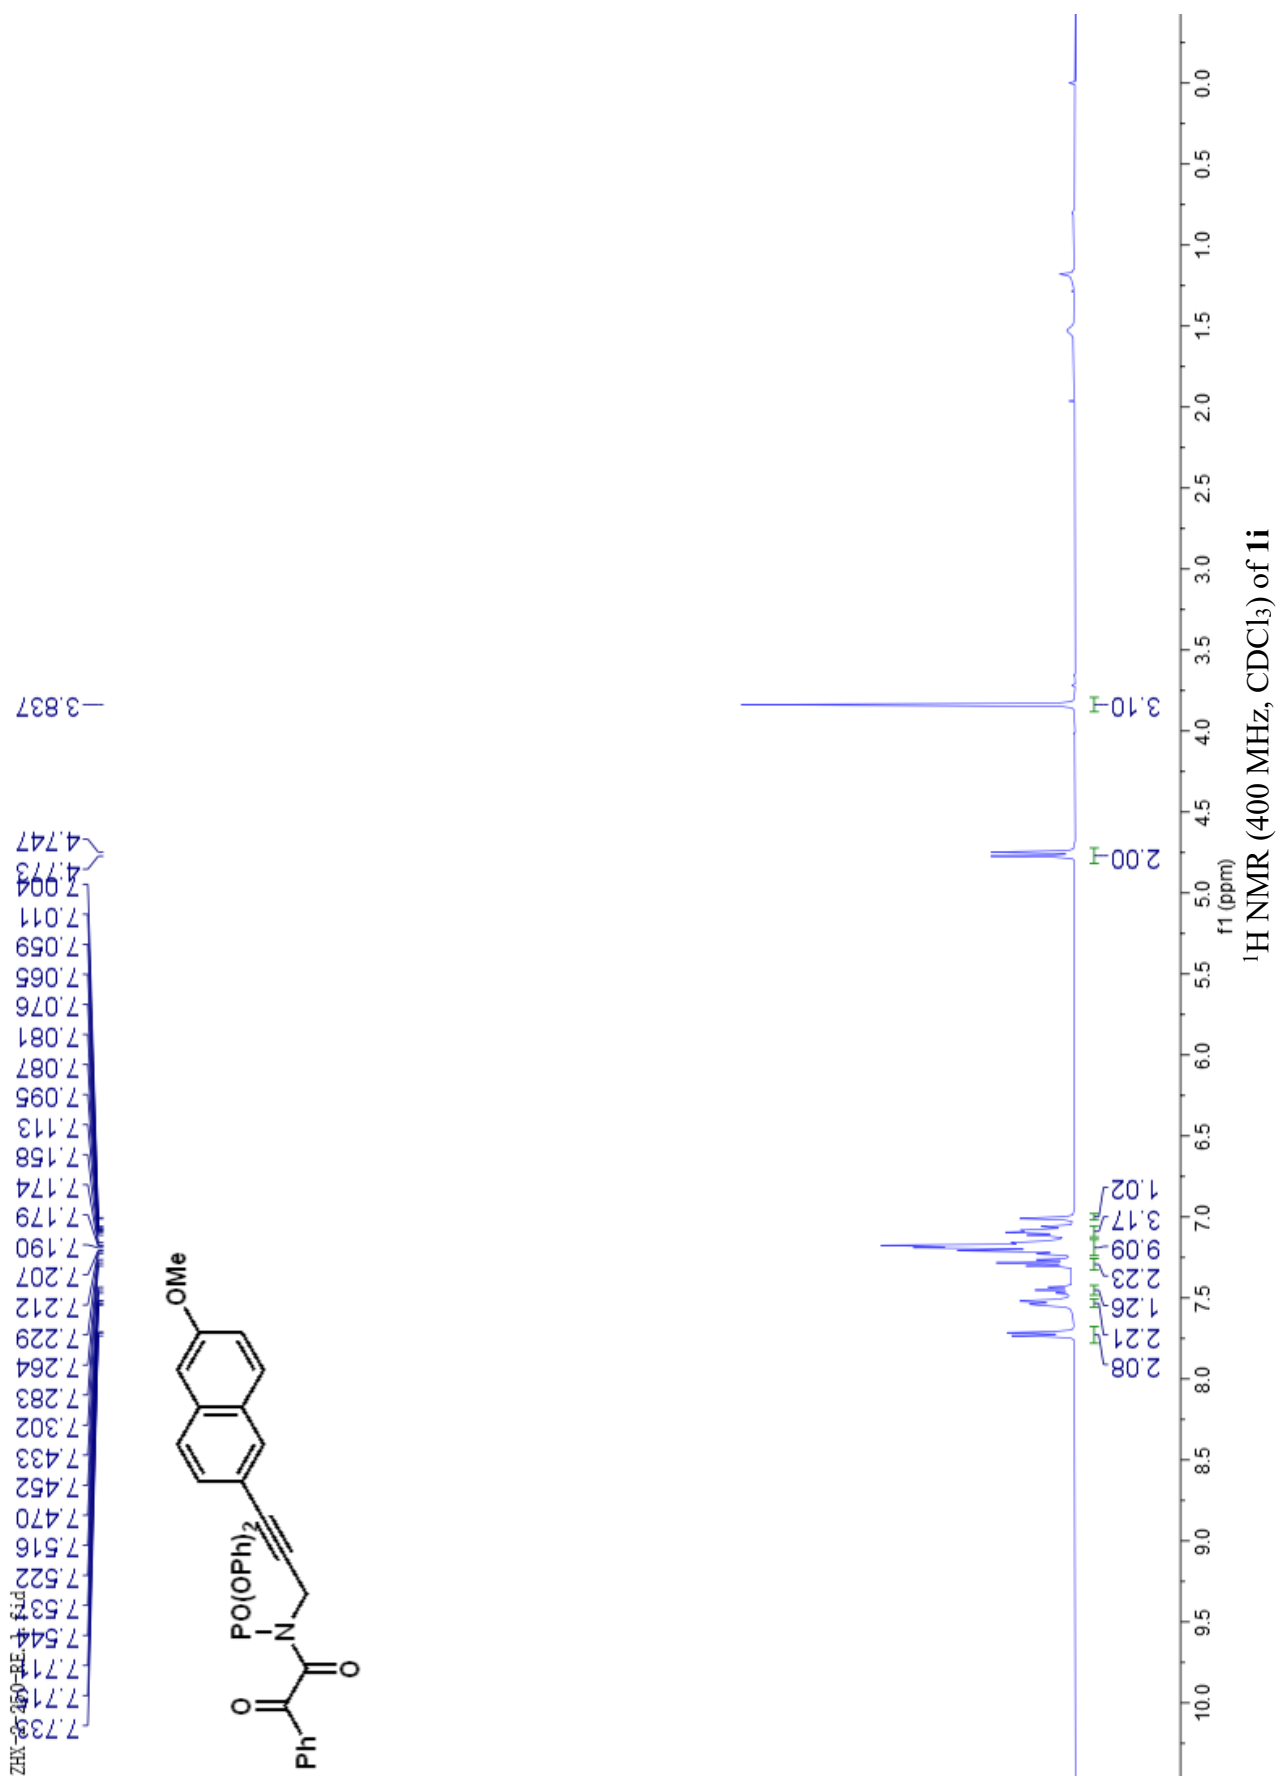

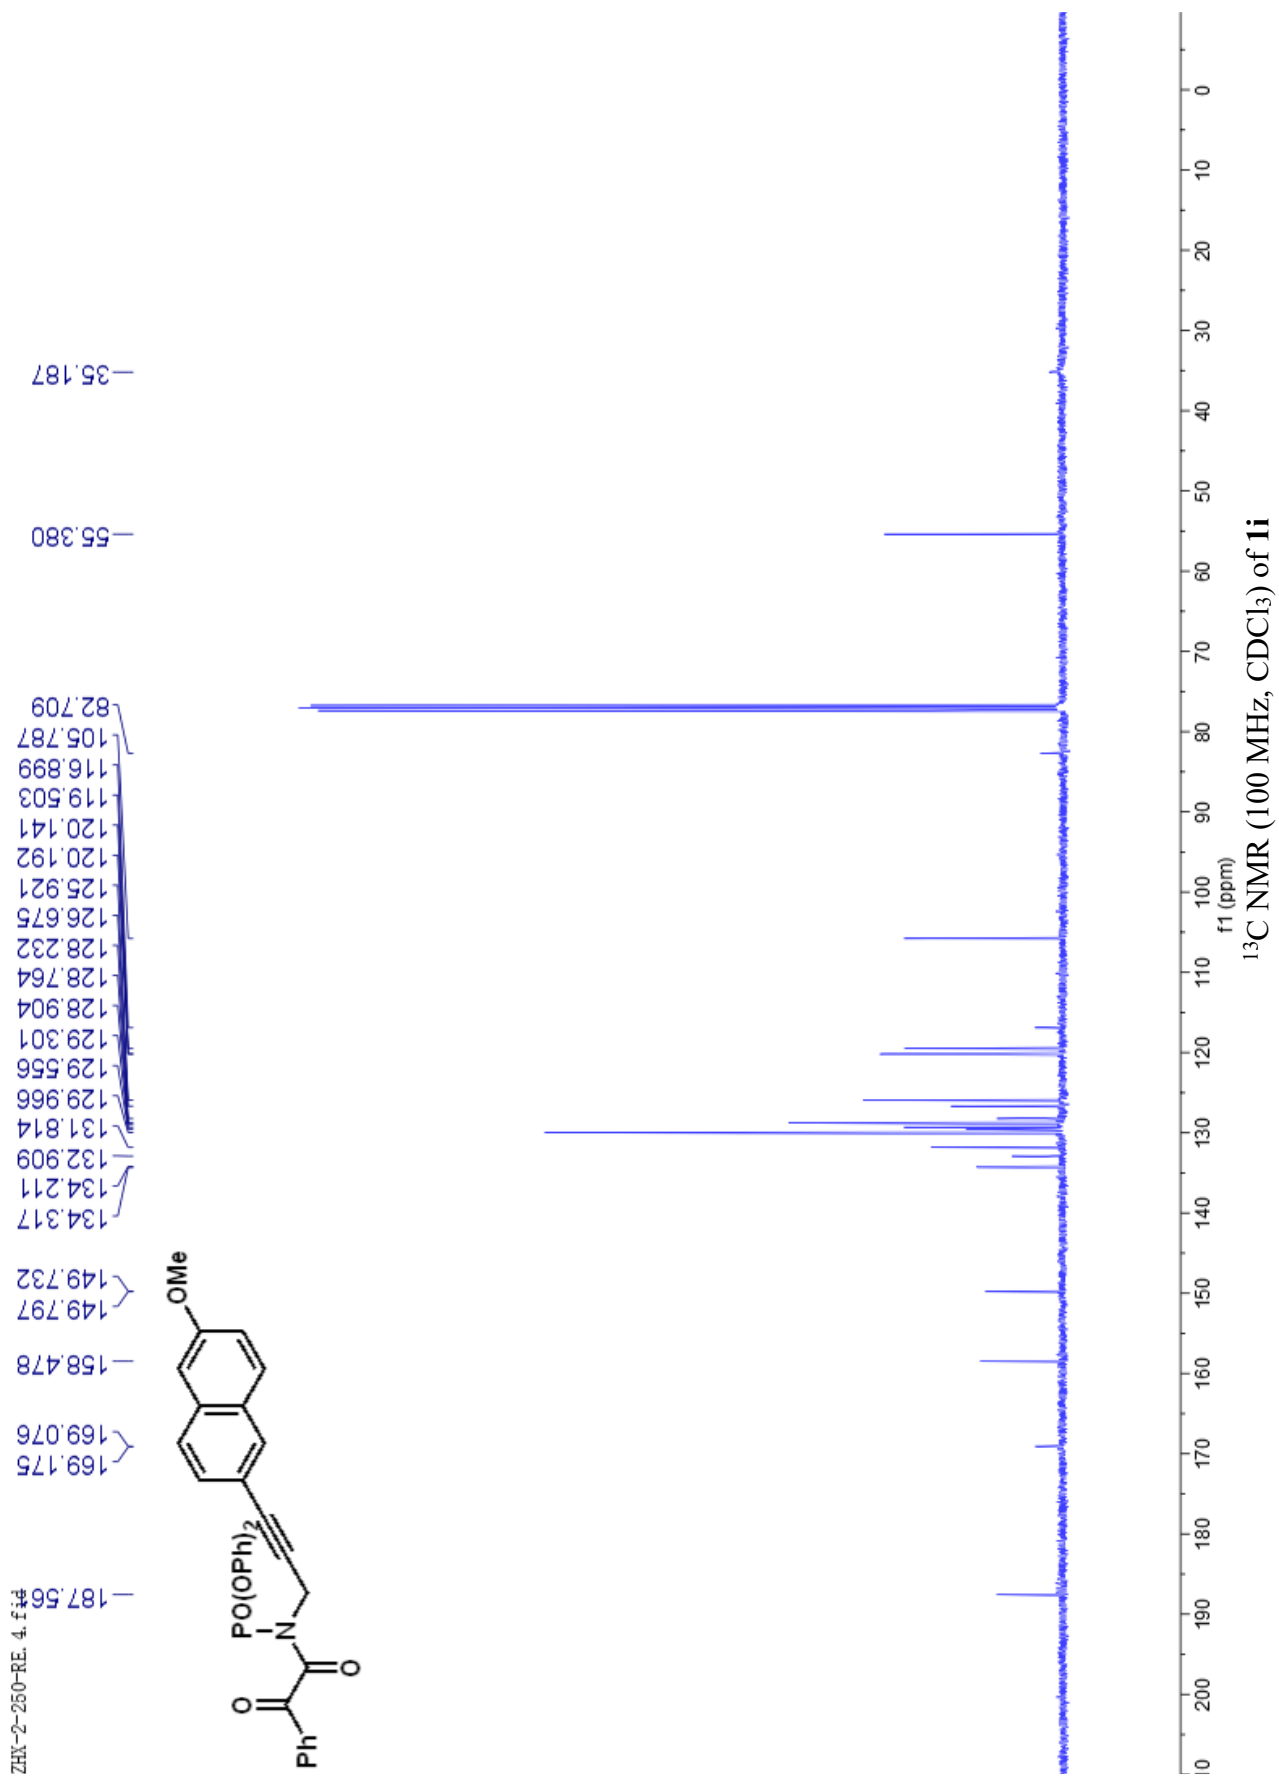

ZHY-2-250-RE. 2. fid

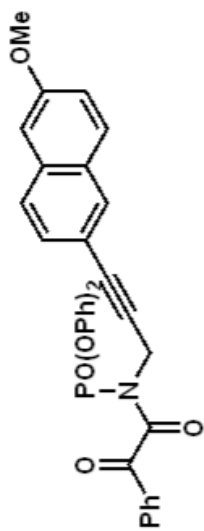

--10.223

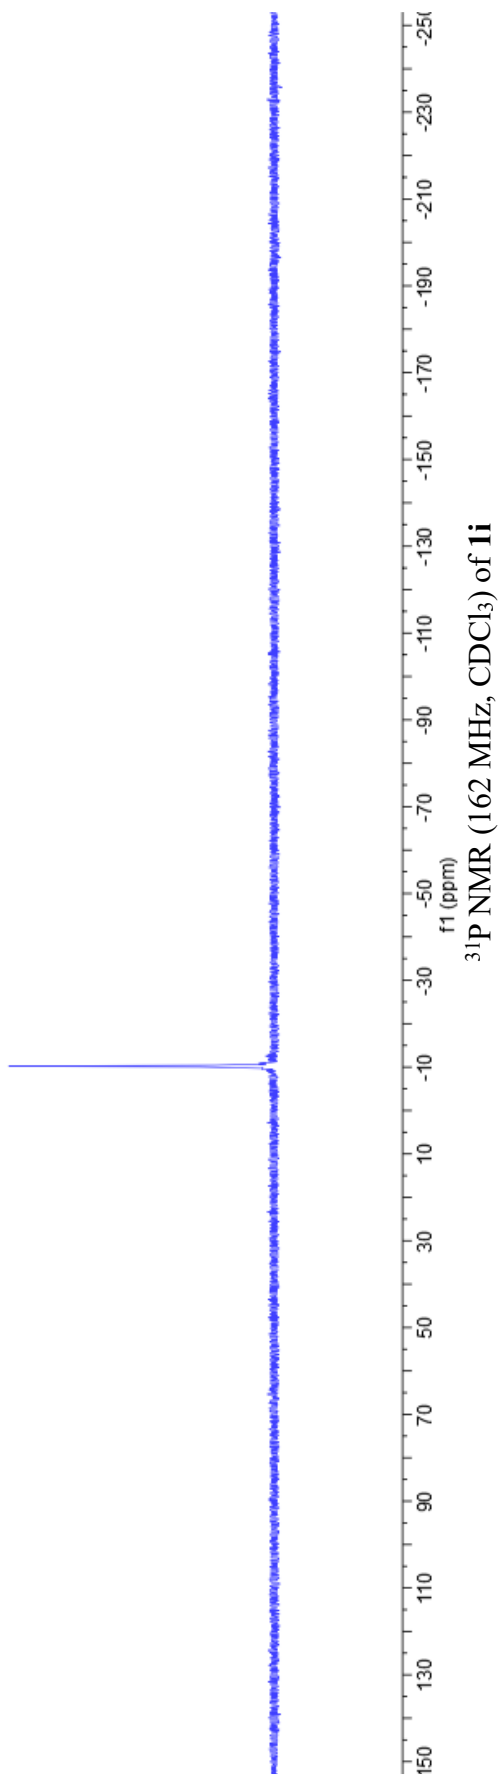

ZHX-2-188-P. 1. fid

7.593  
7.573  
7.205  
7.188  
7.168  
7.150  
7.139  
7.118  
7.092  
7.075  
7.058  
7.047  
7.027

4.700  
4.674

2.242

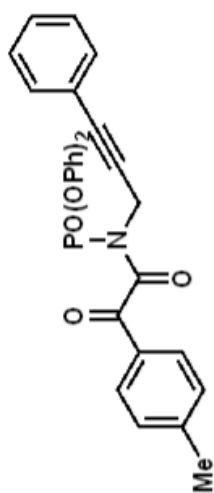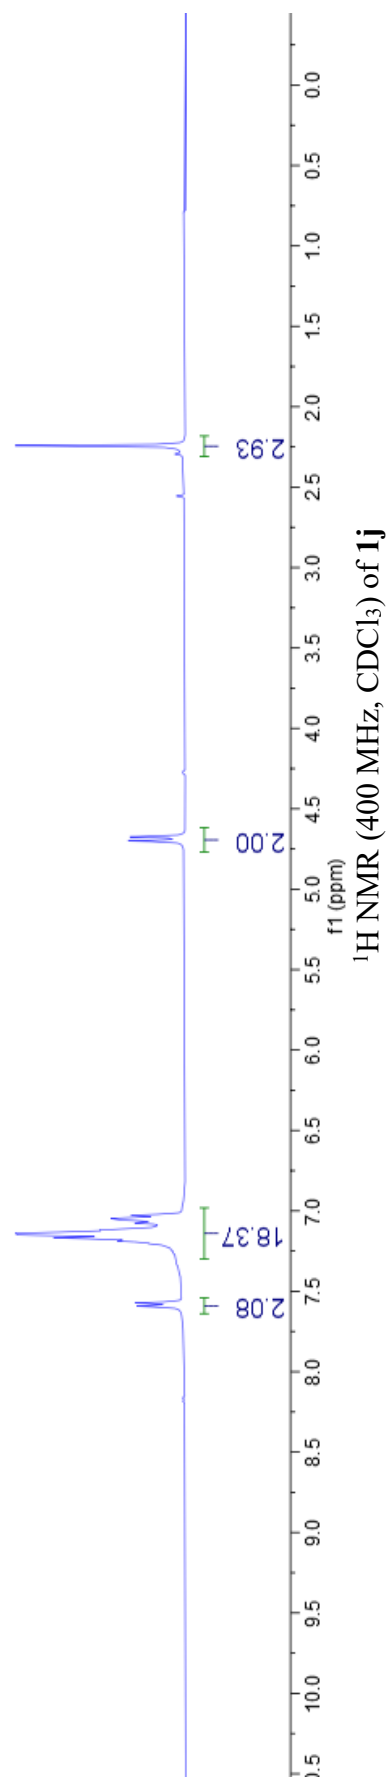



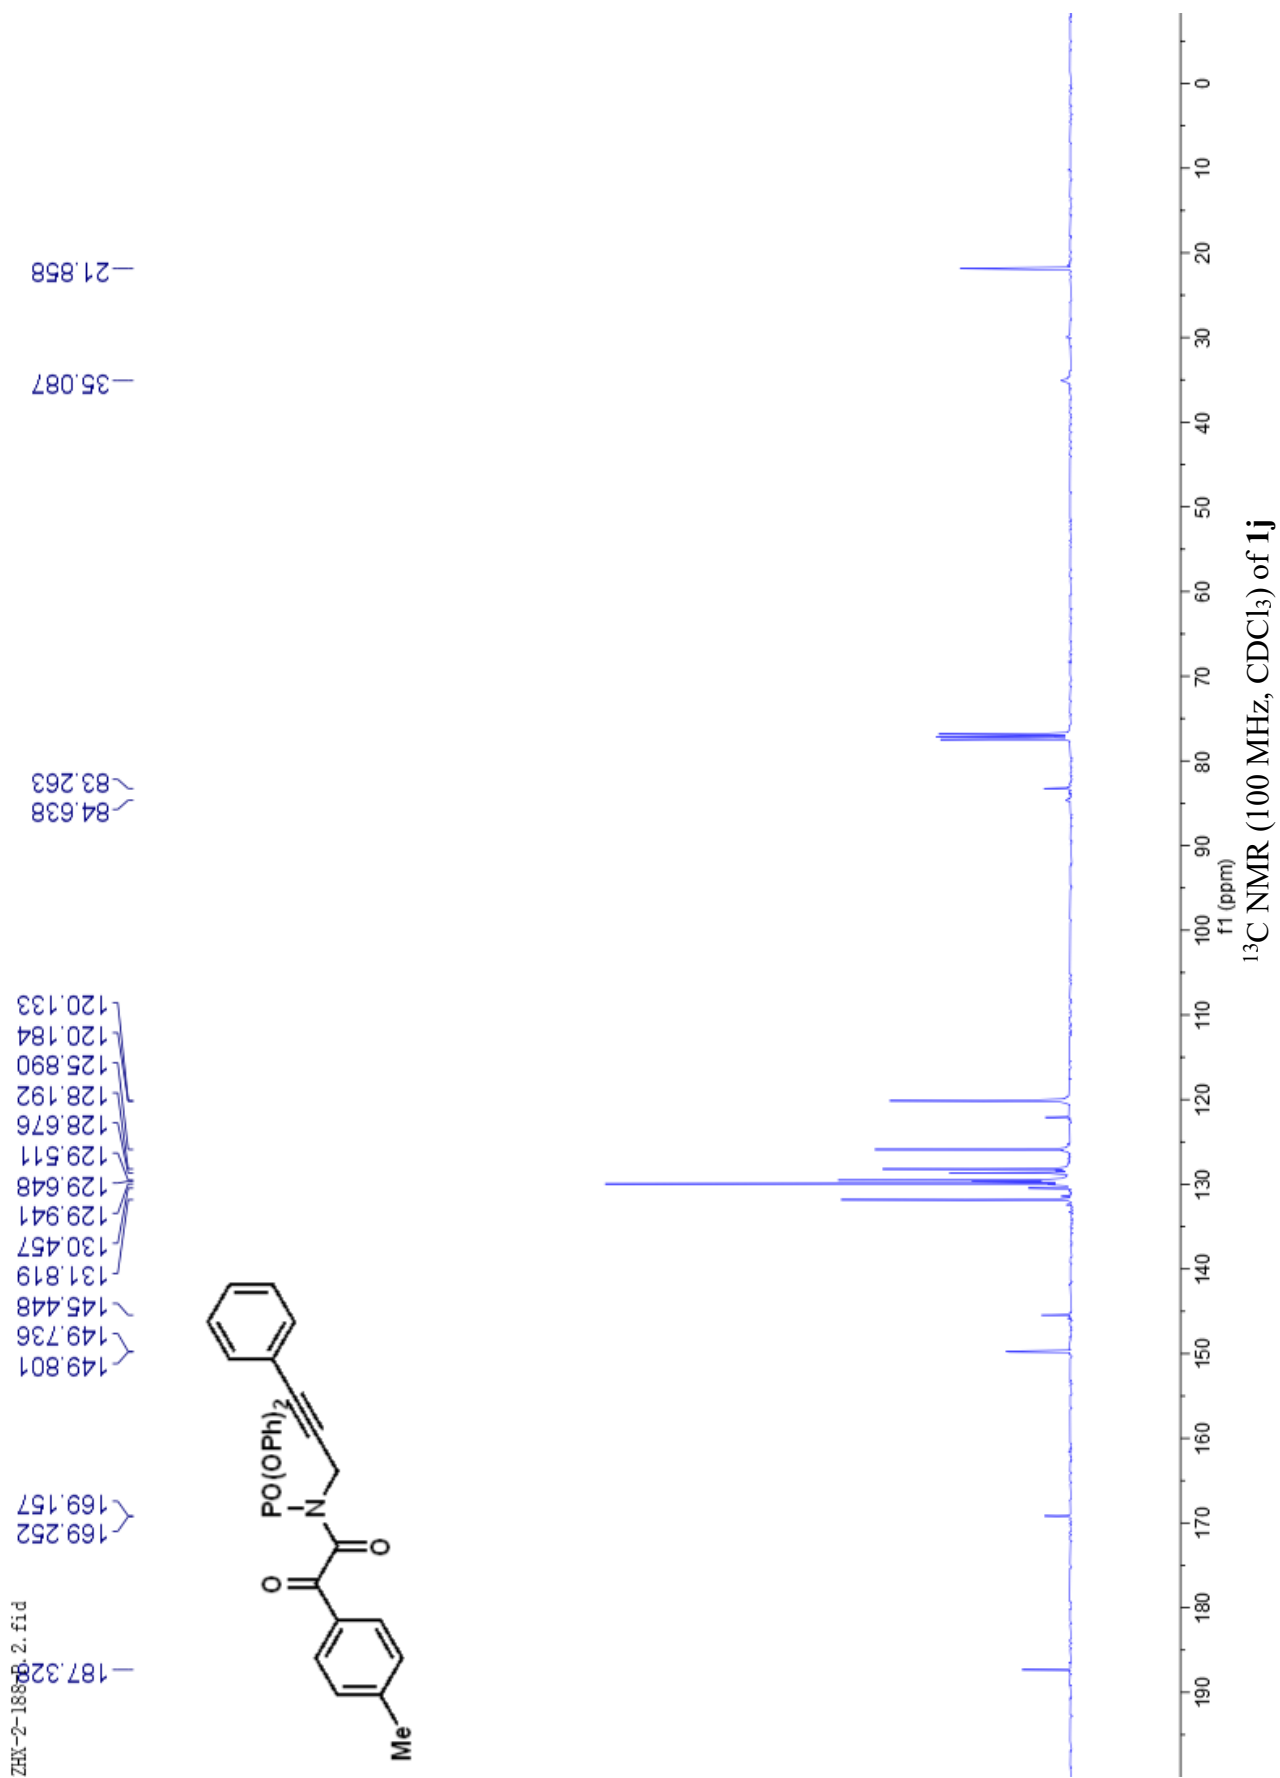

ZHX-2-188-P. 1. fid

--10.234

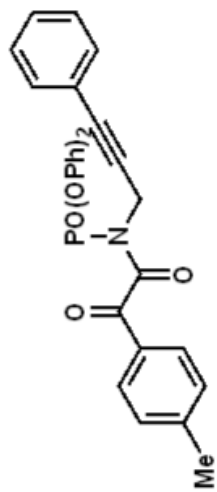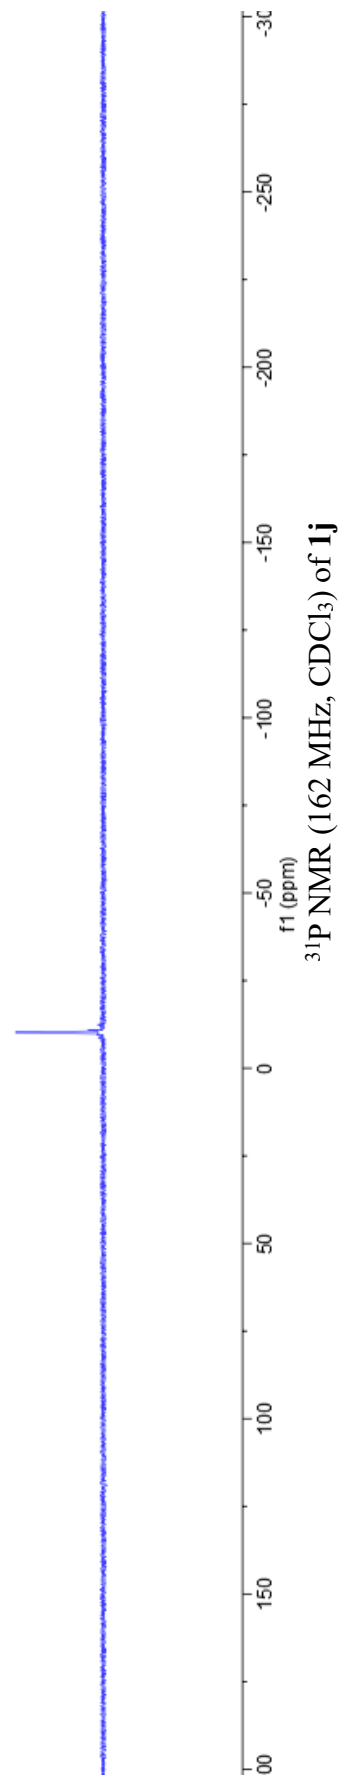

ZHX-2-194-P. 1. fid

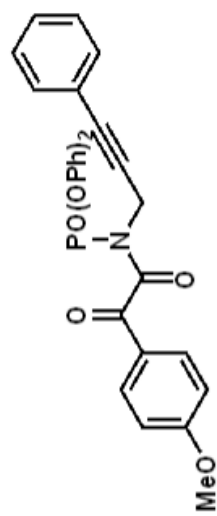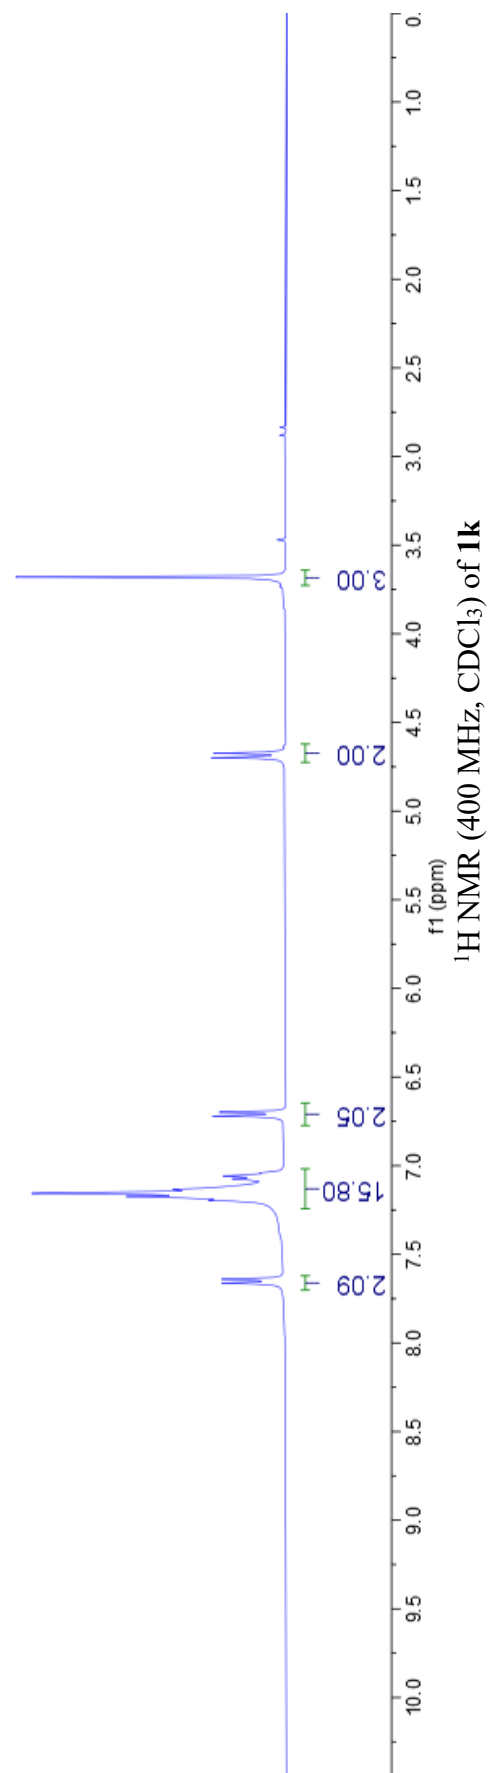

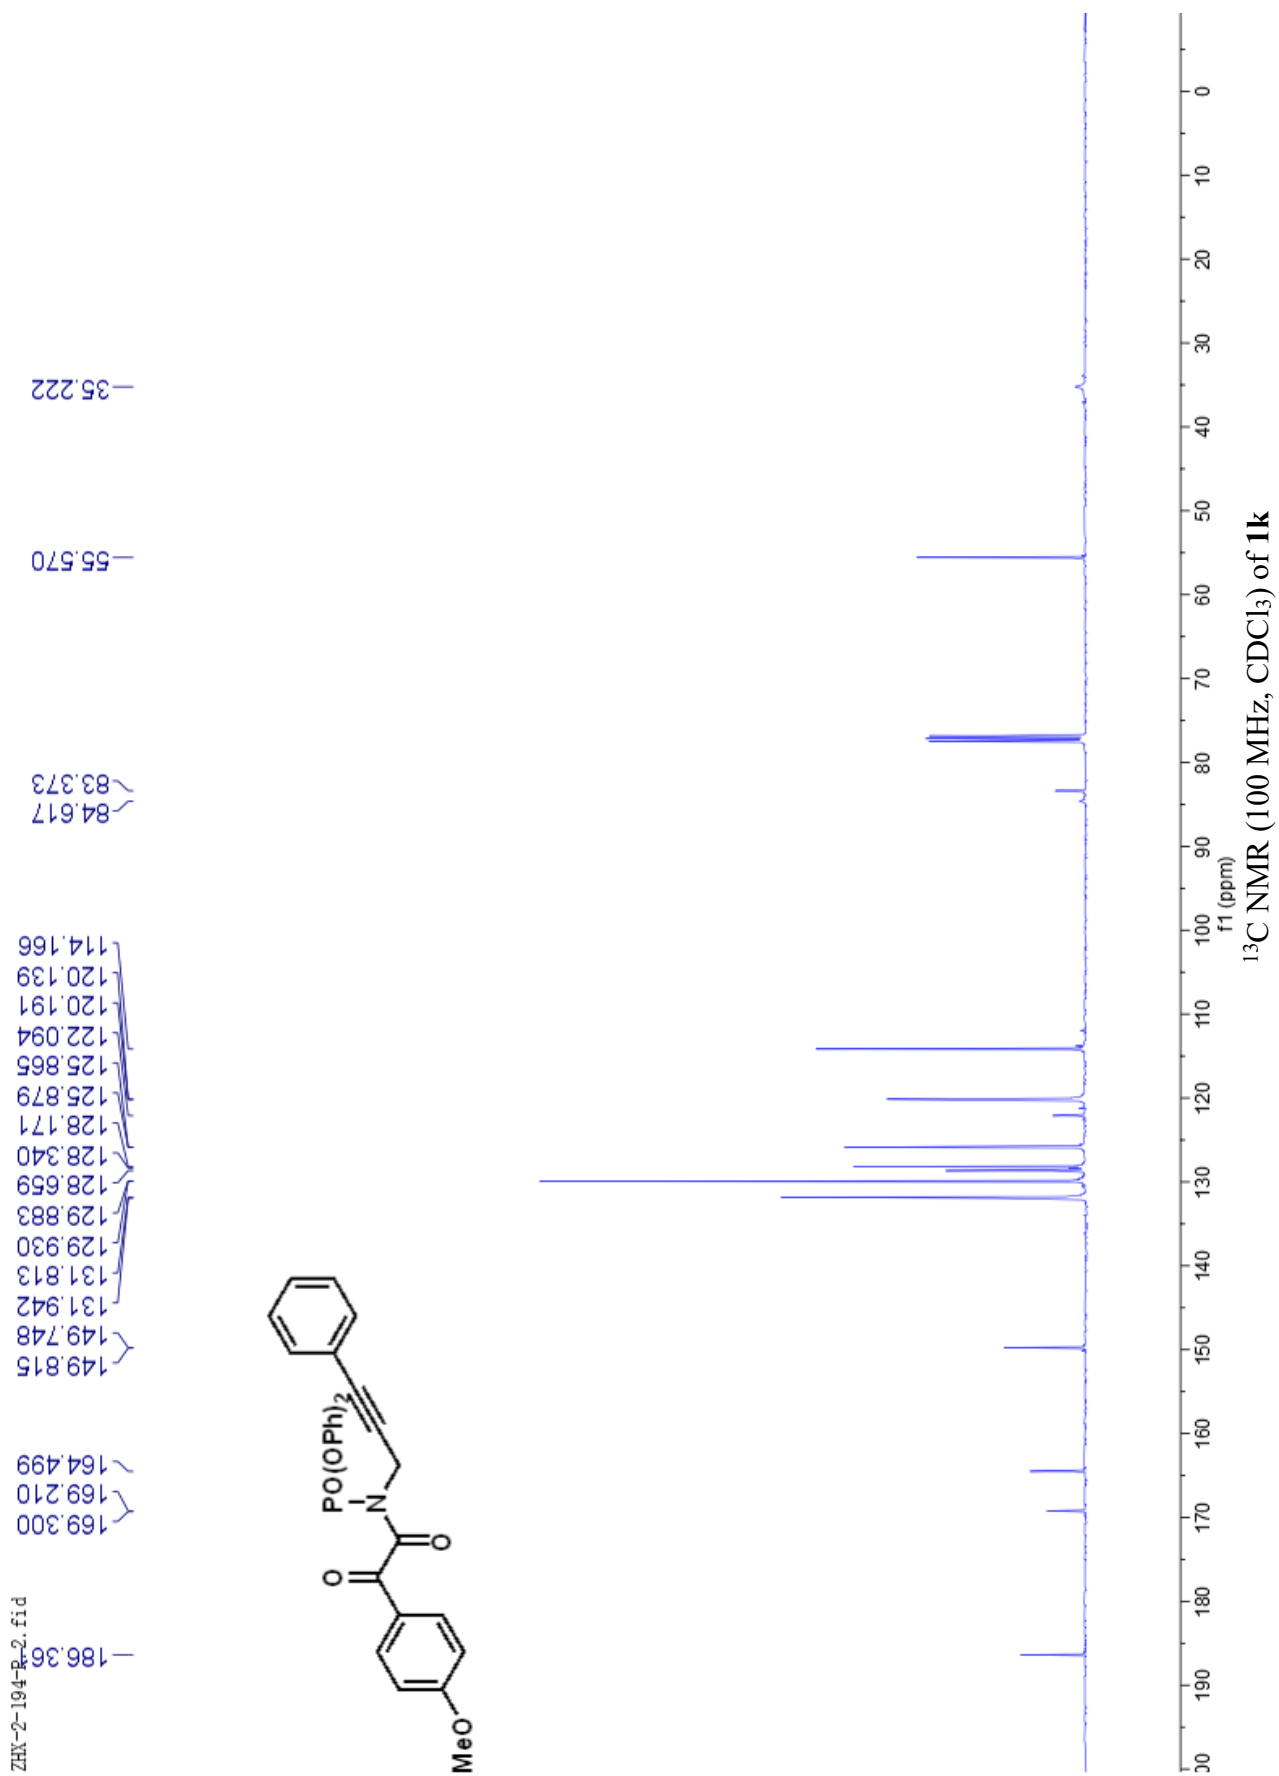

ZHY-2-194-P.1.fid

--10.168

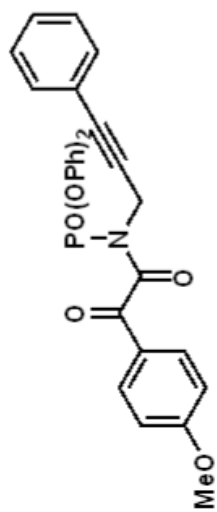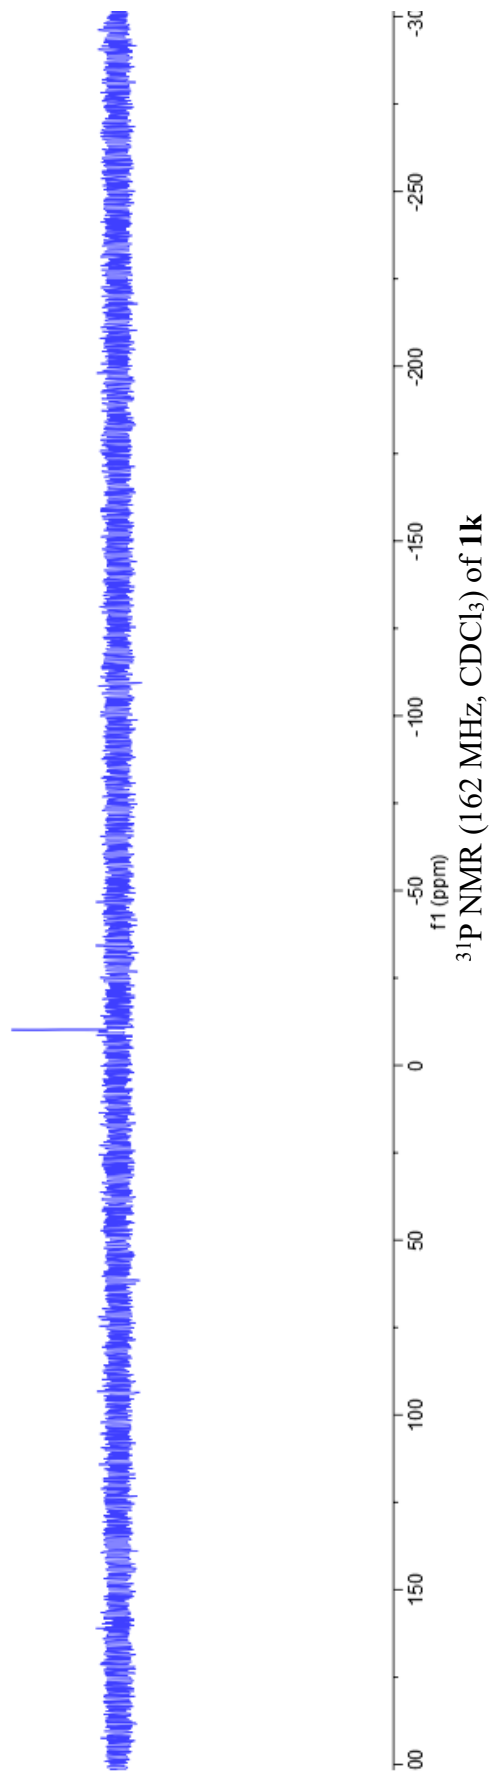

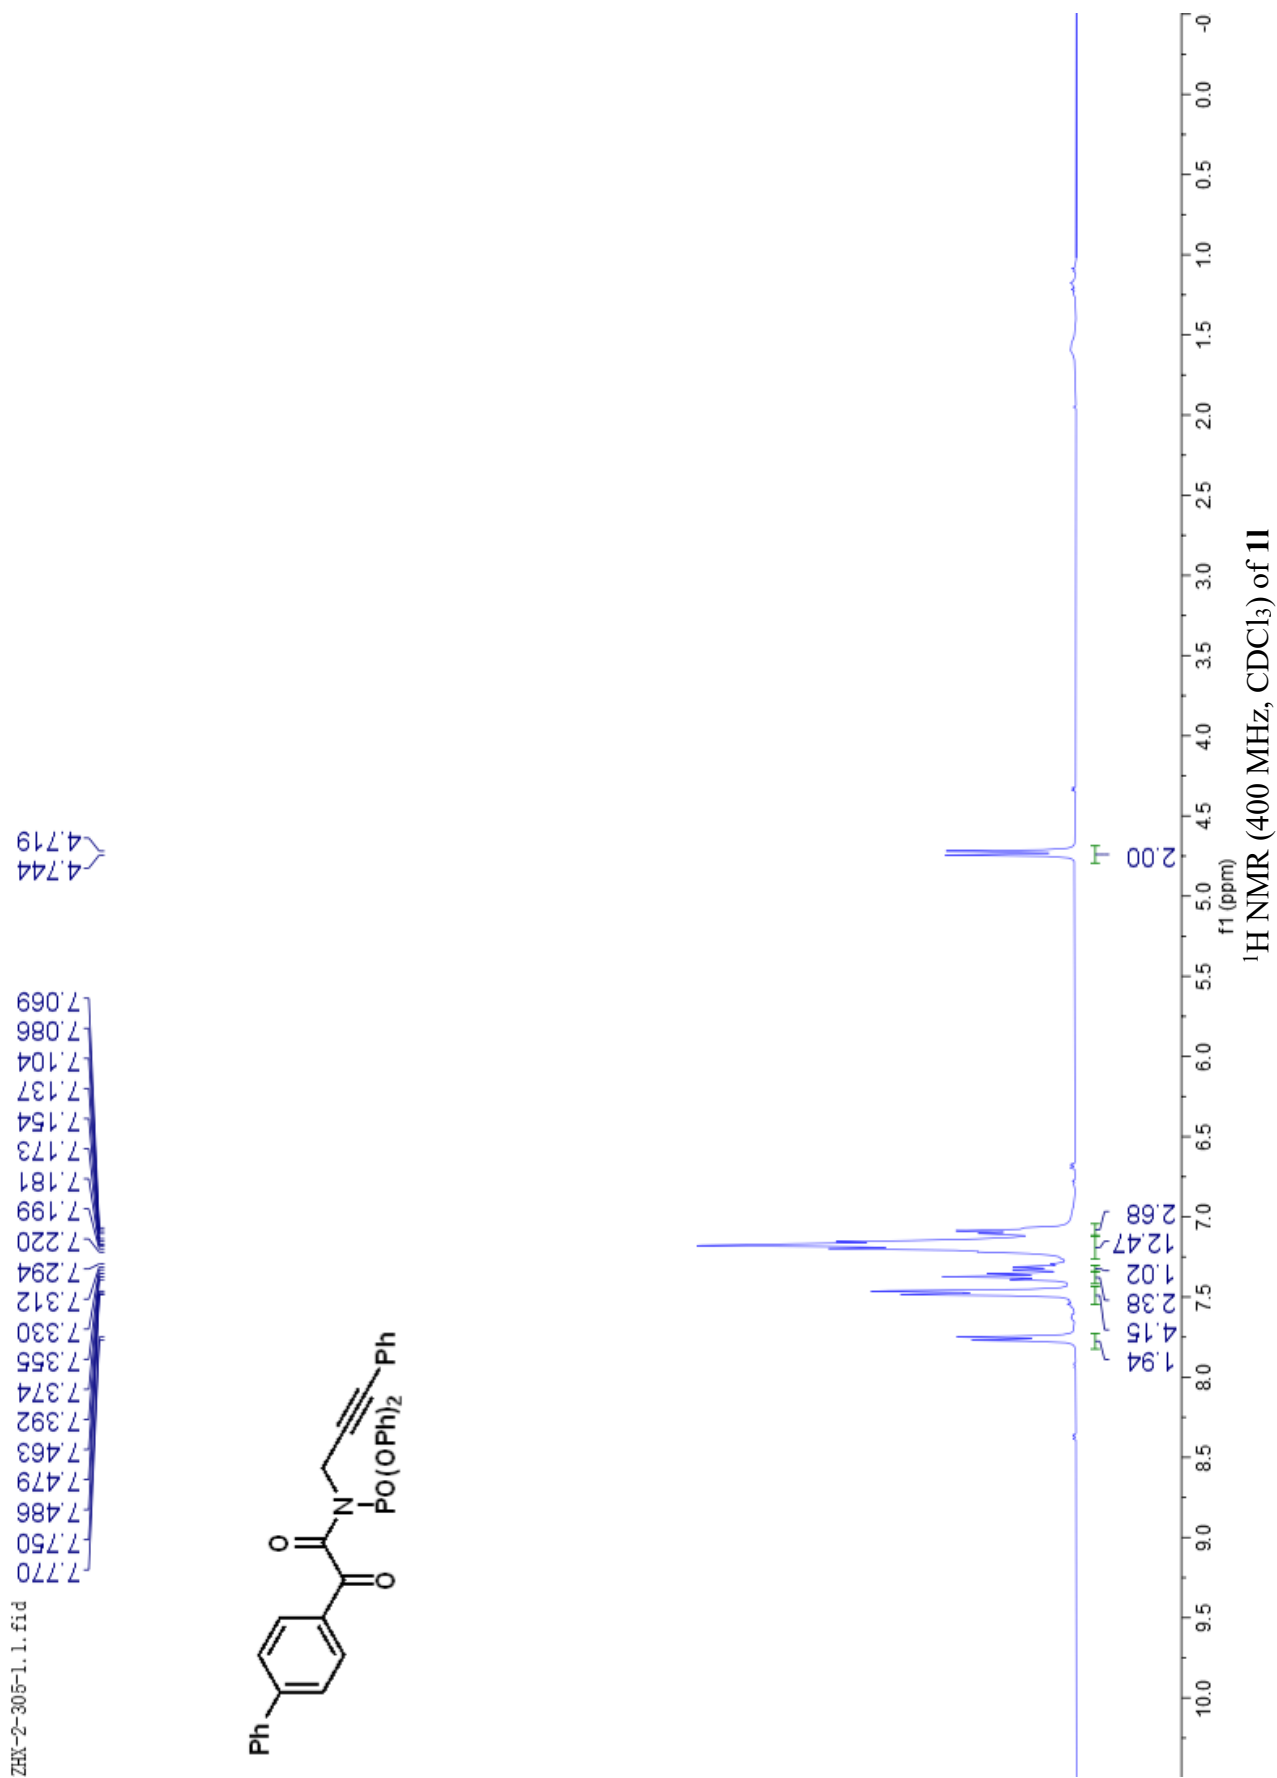

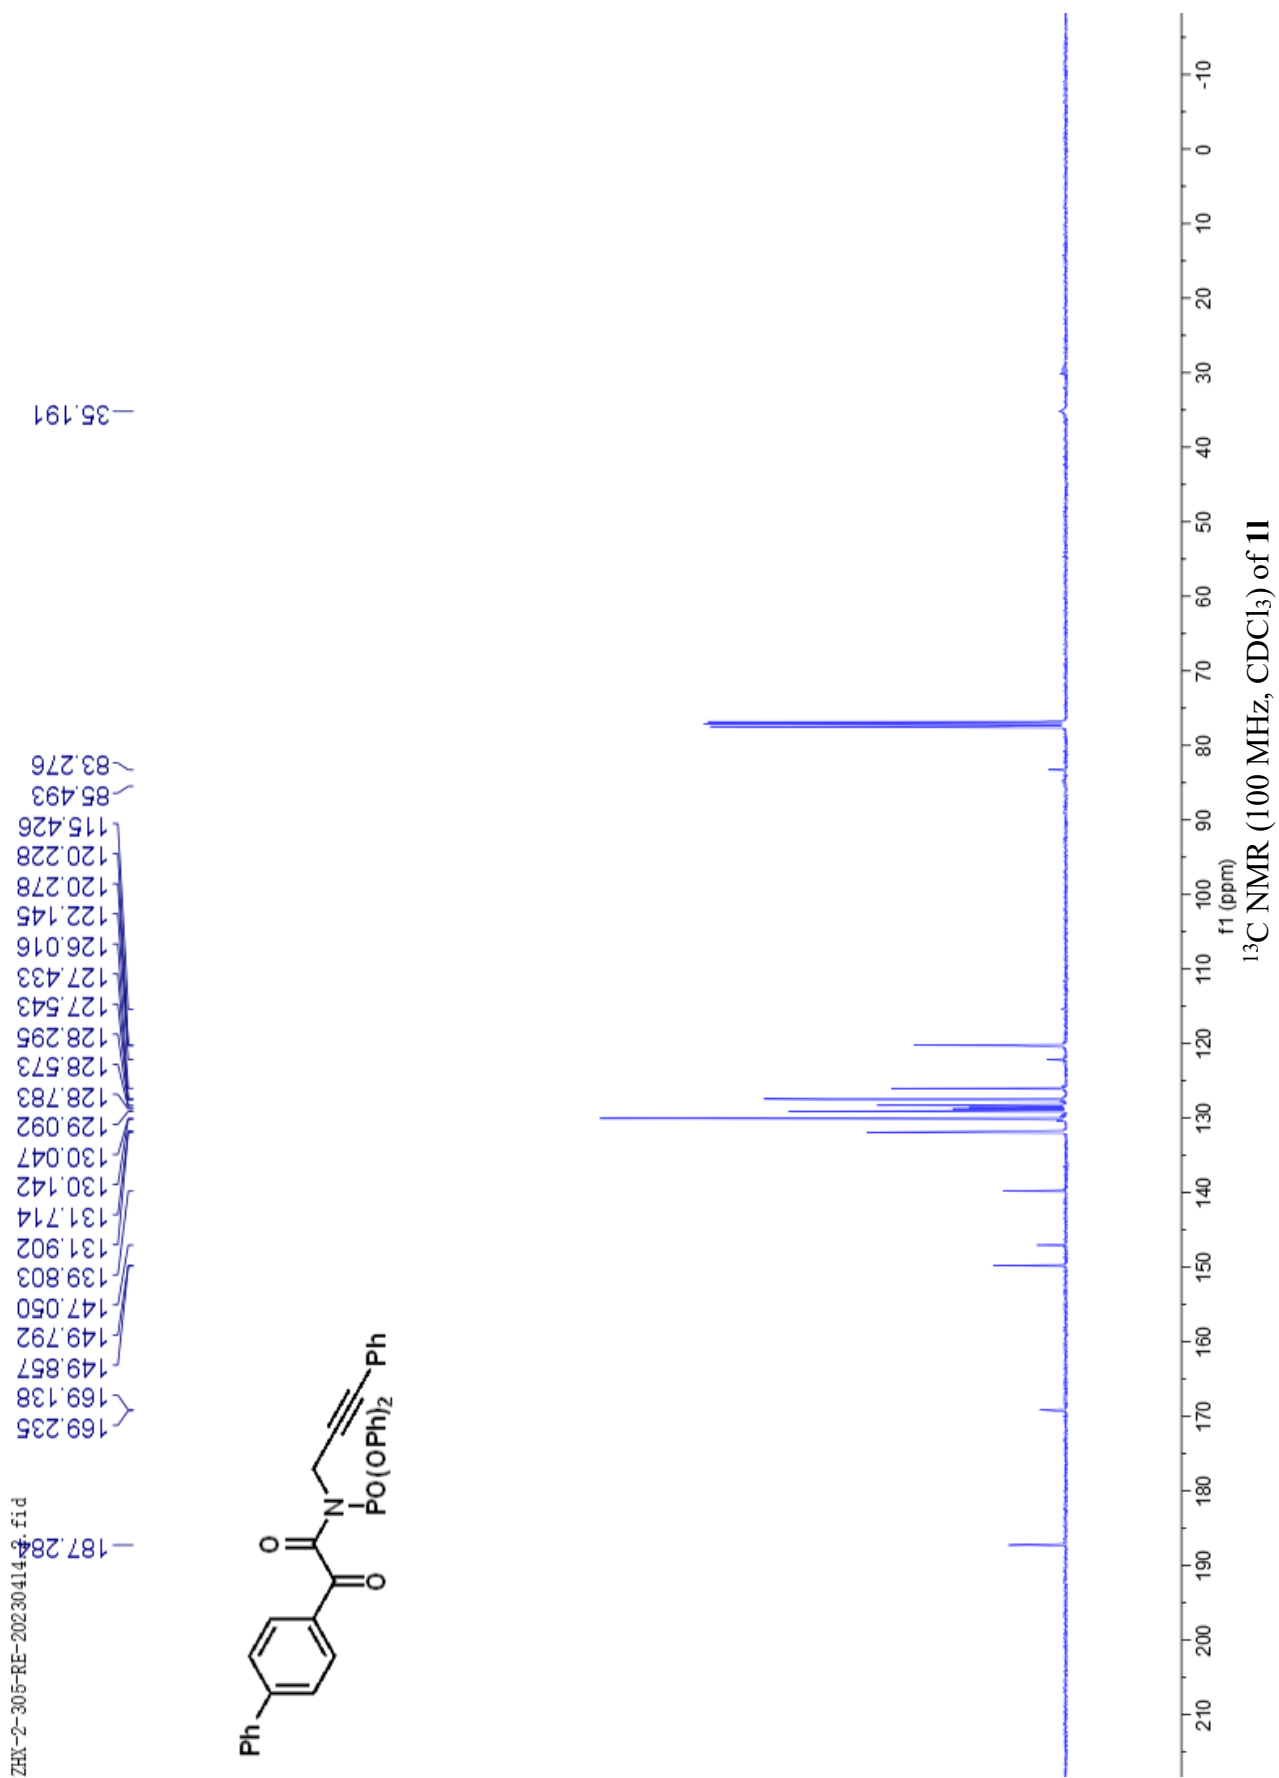

ZHX-2-305-RE-20230413. 2. fid

10.199

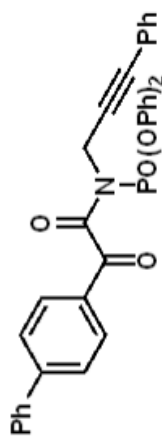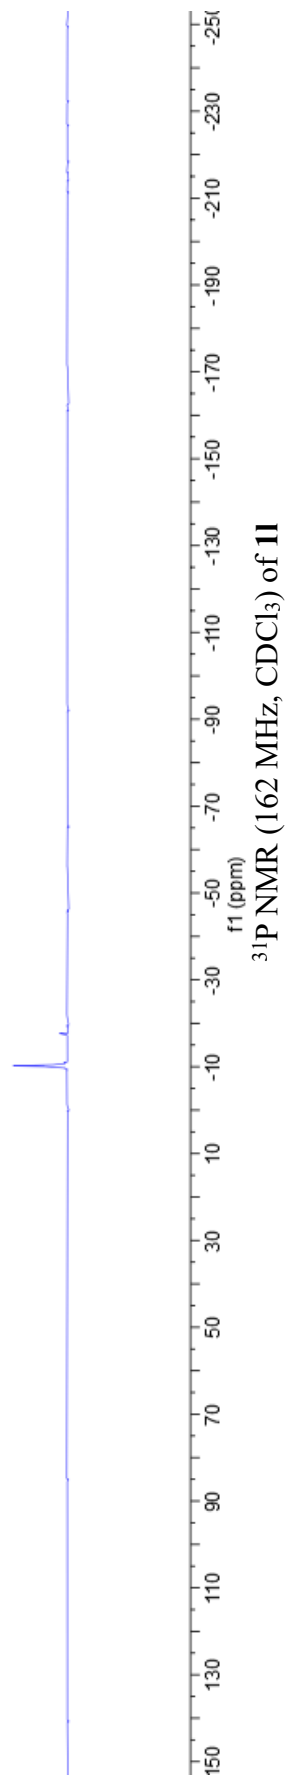



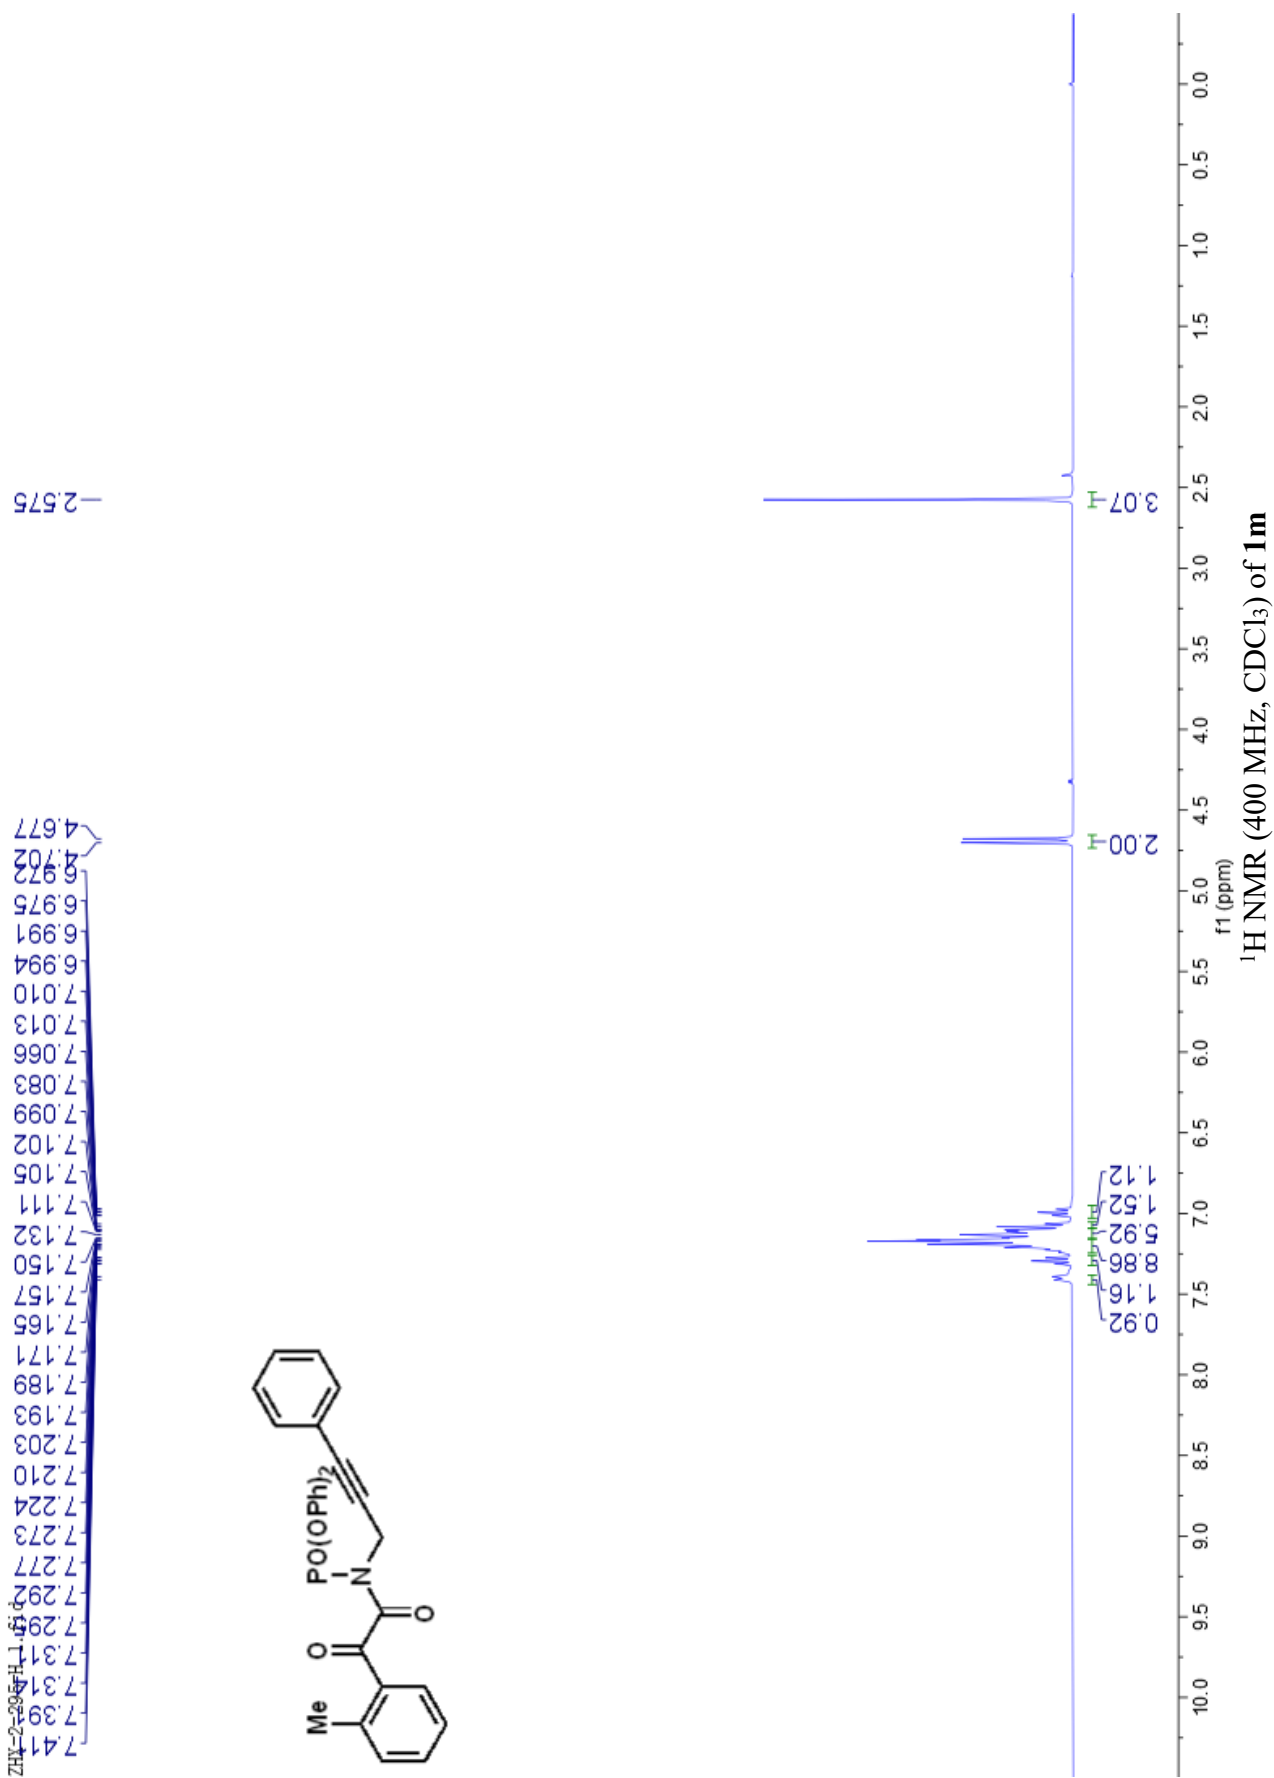

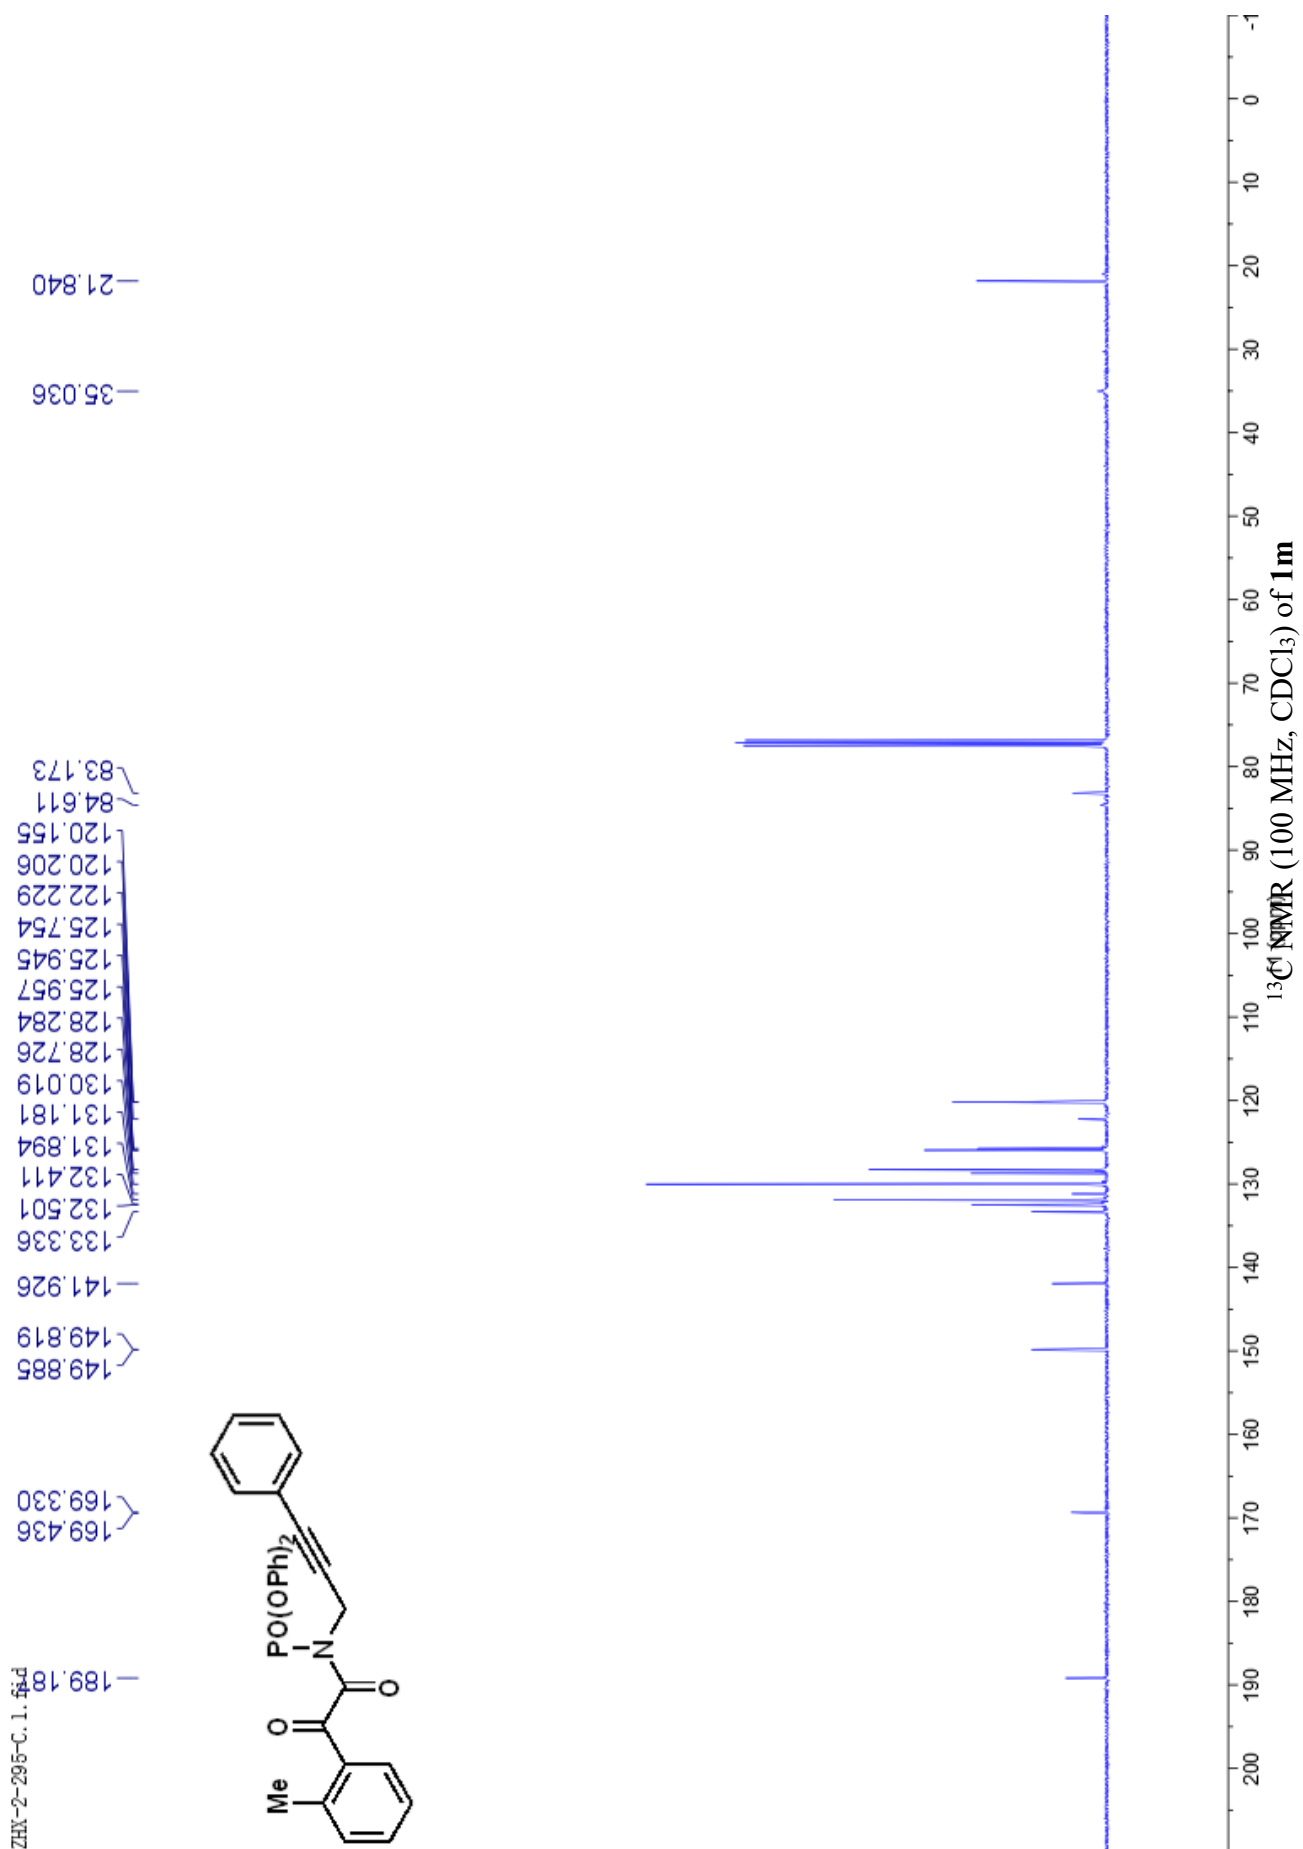

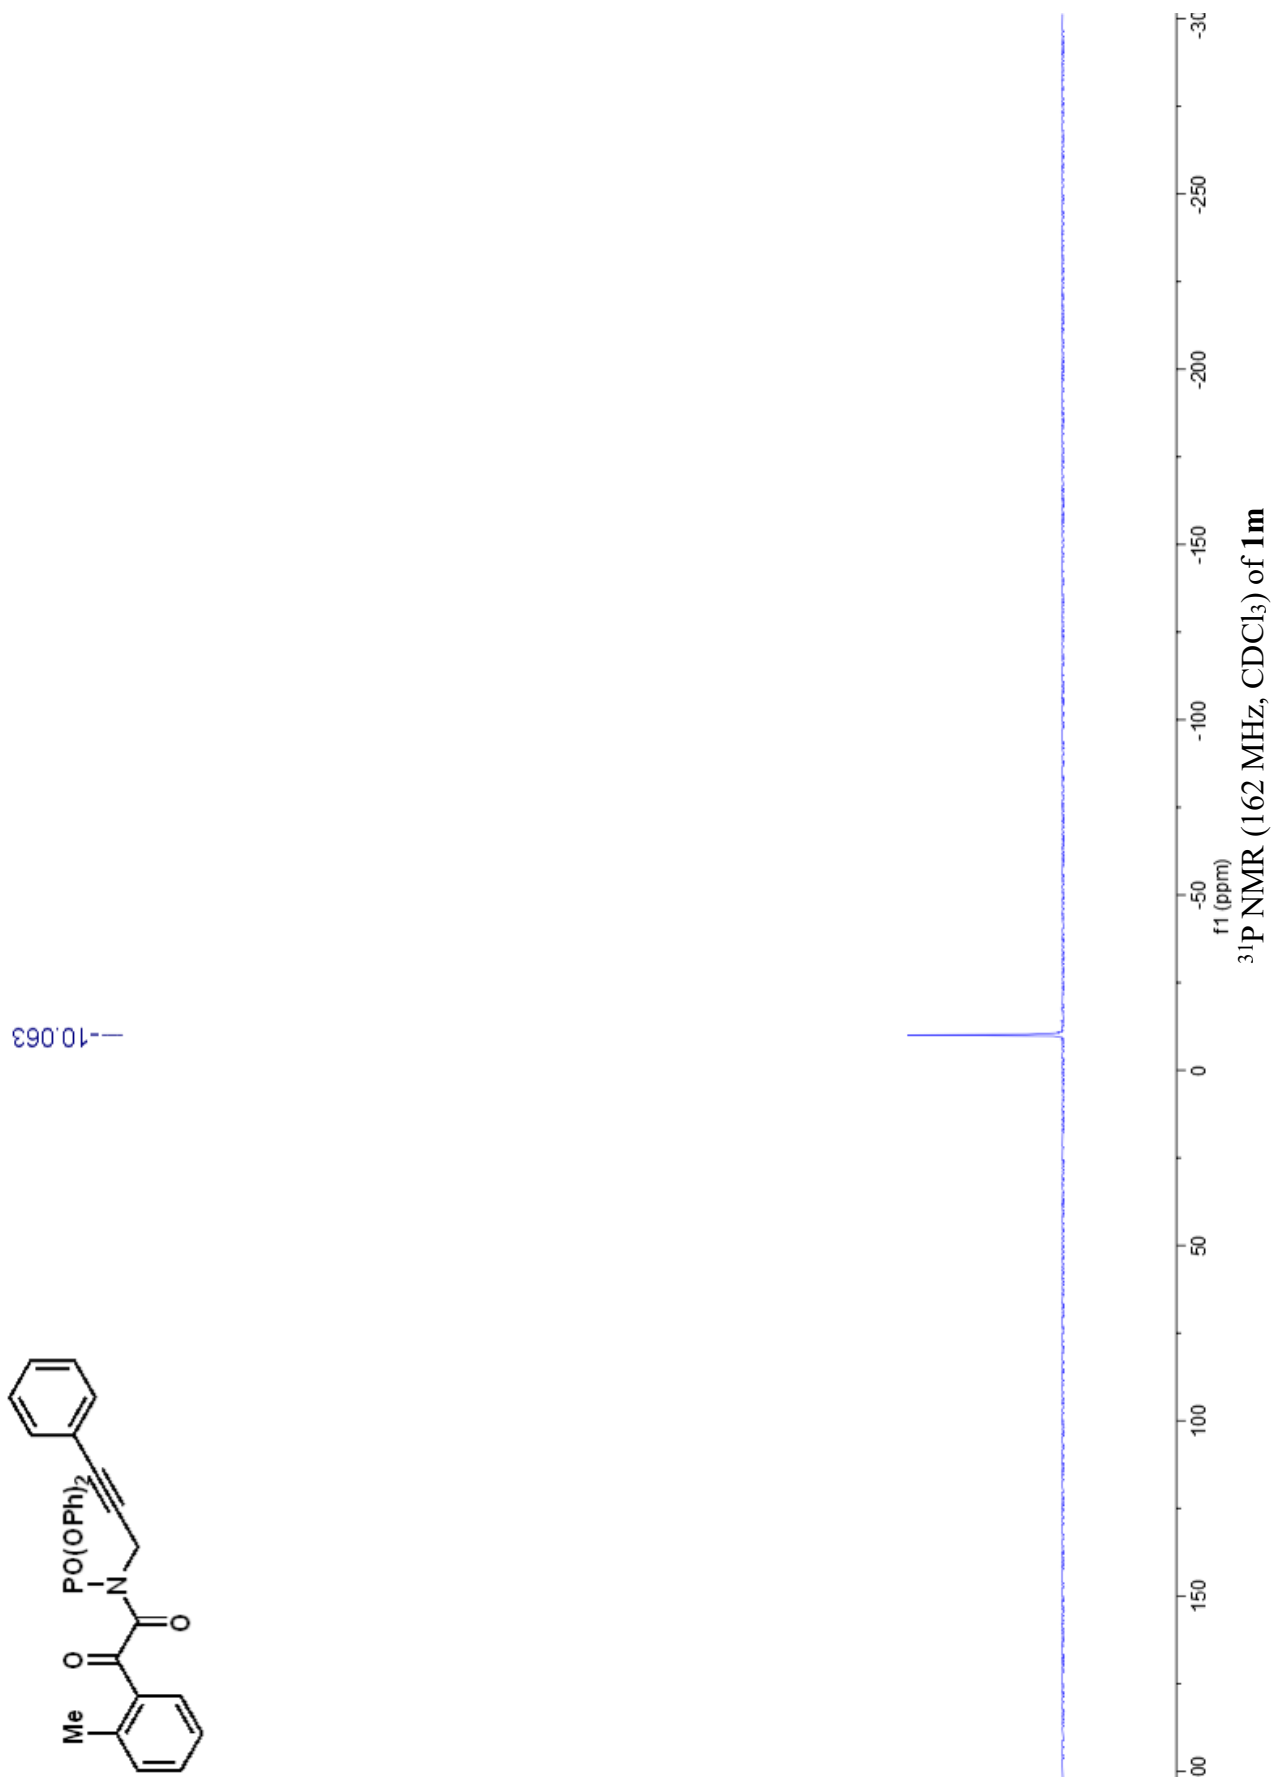

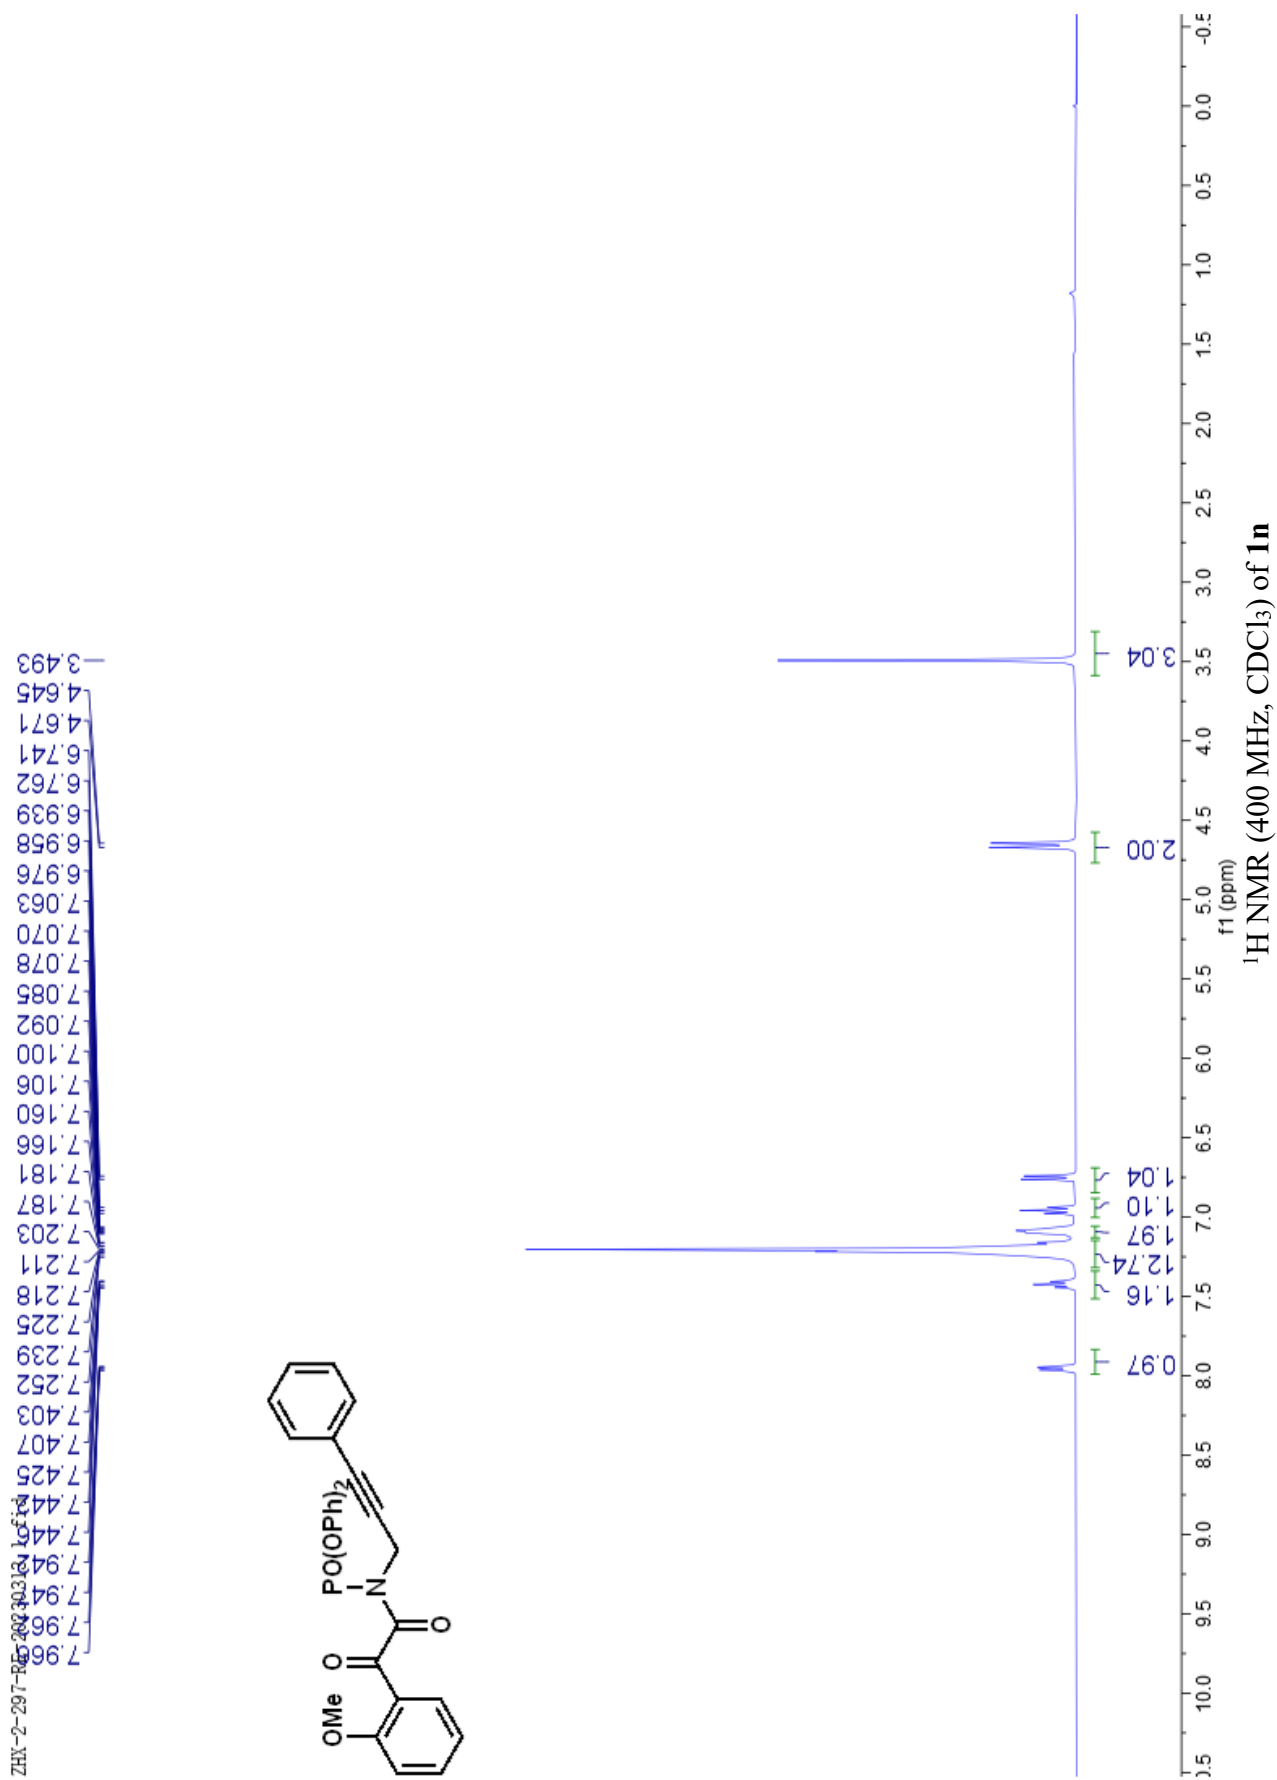

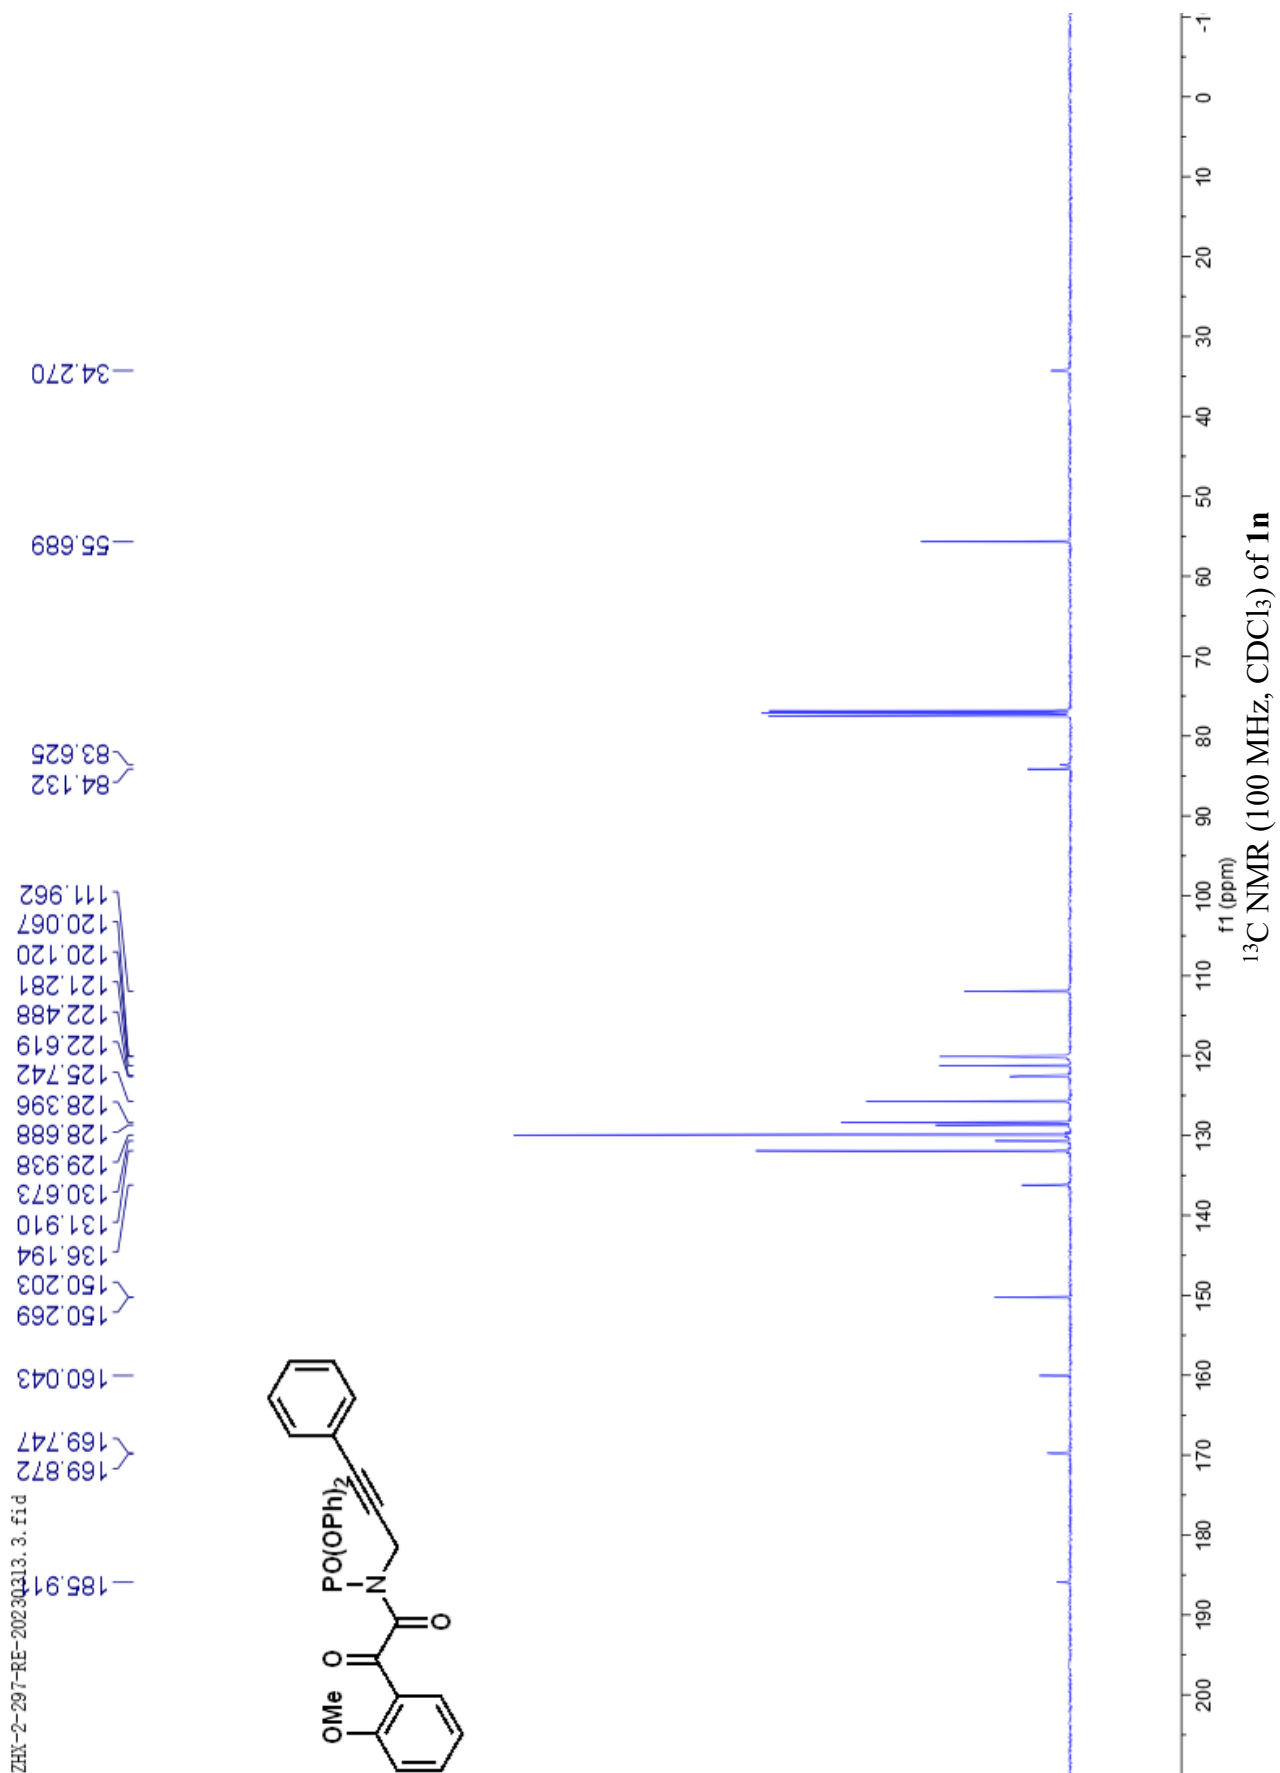

ZHY-2-297-RE-20230313\_2.fid

-10.161

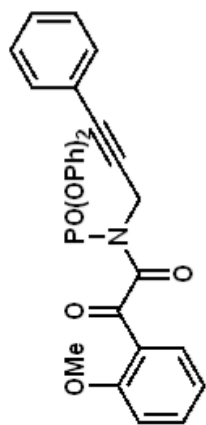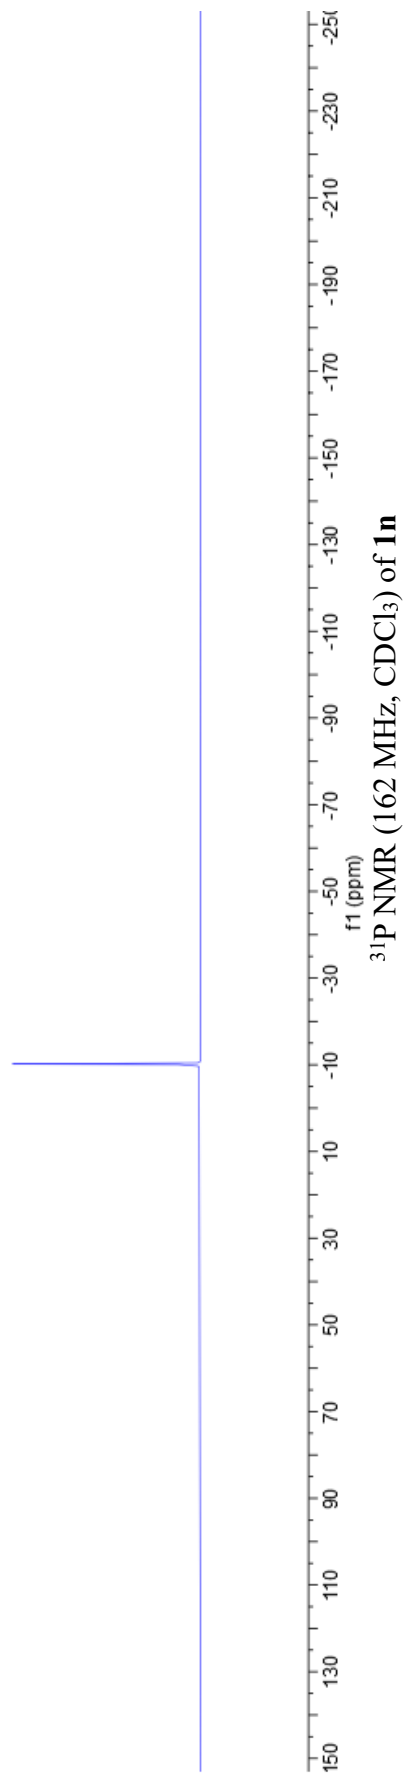

ZHX-2-296-1.2.fid

7.529  
7.518  
7.499  
7.272  
7.252  
7.225  
7.205  
7.191  
7.186  
7.174  
7.159  
7.154  
7.139  
7.113  
7.095  
7.077

4.726  
4.701

-2.186

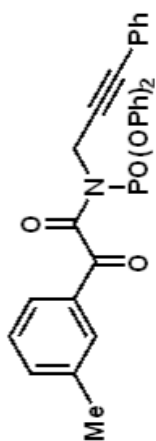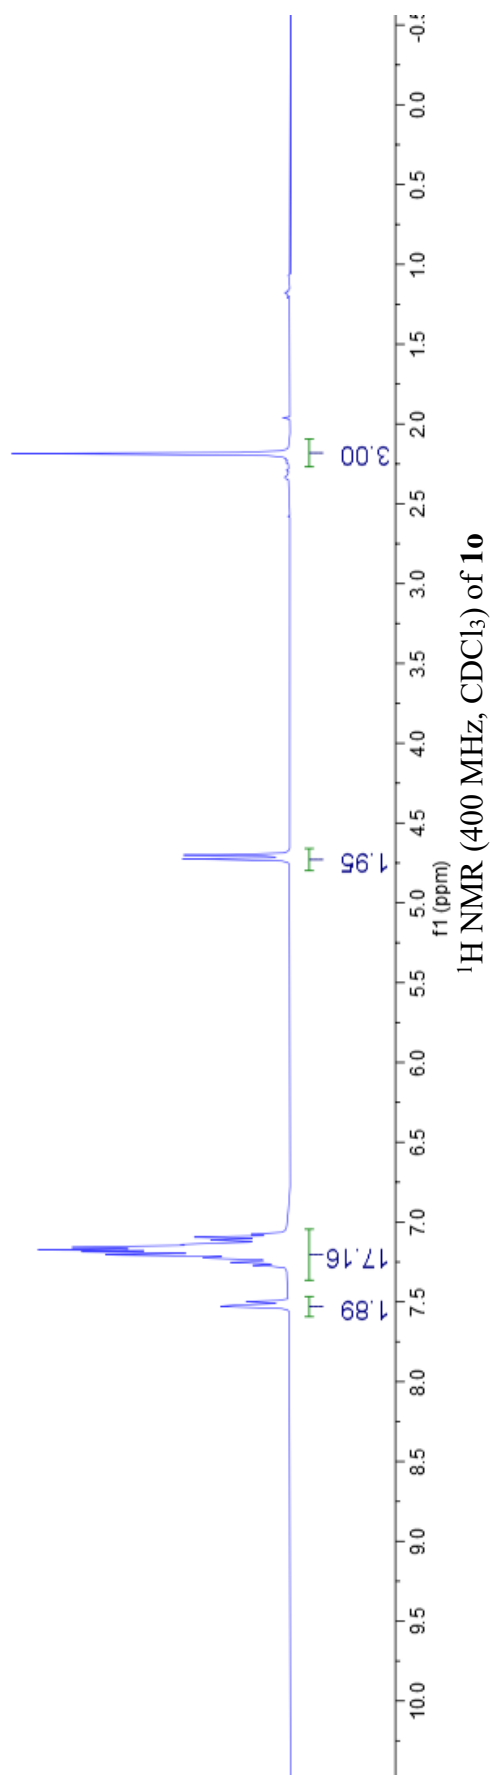

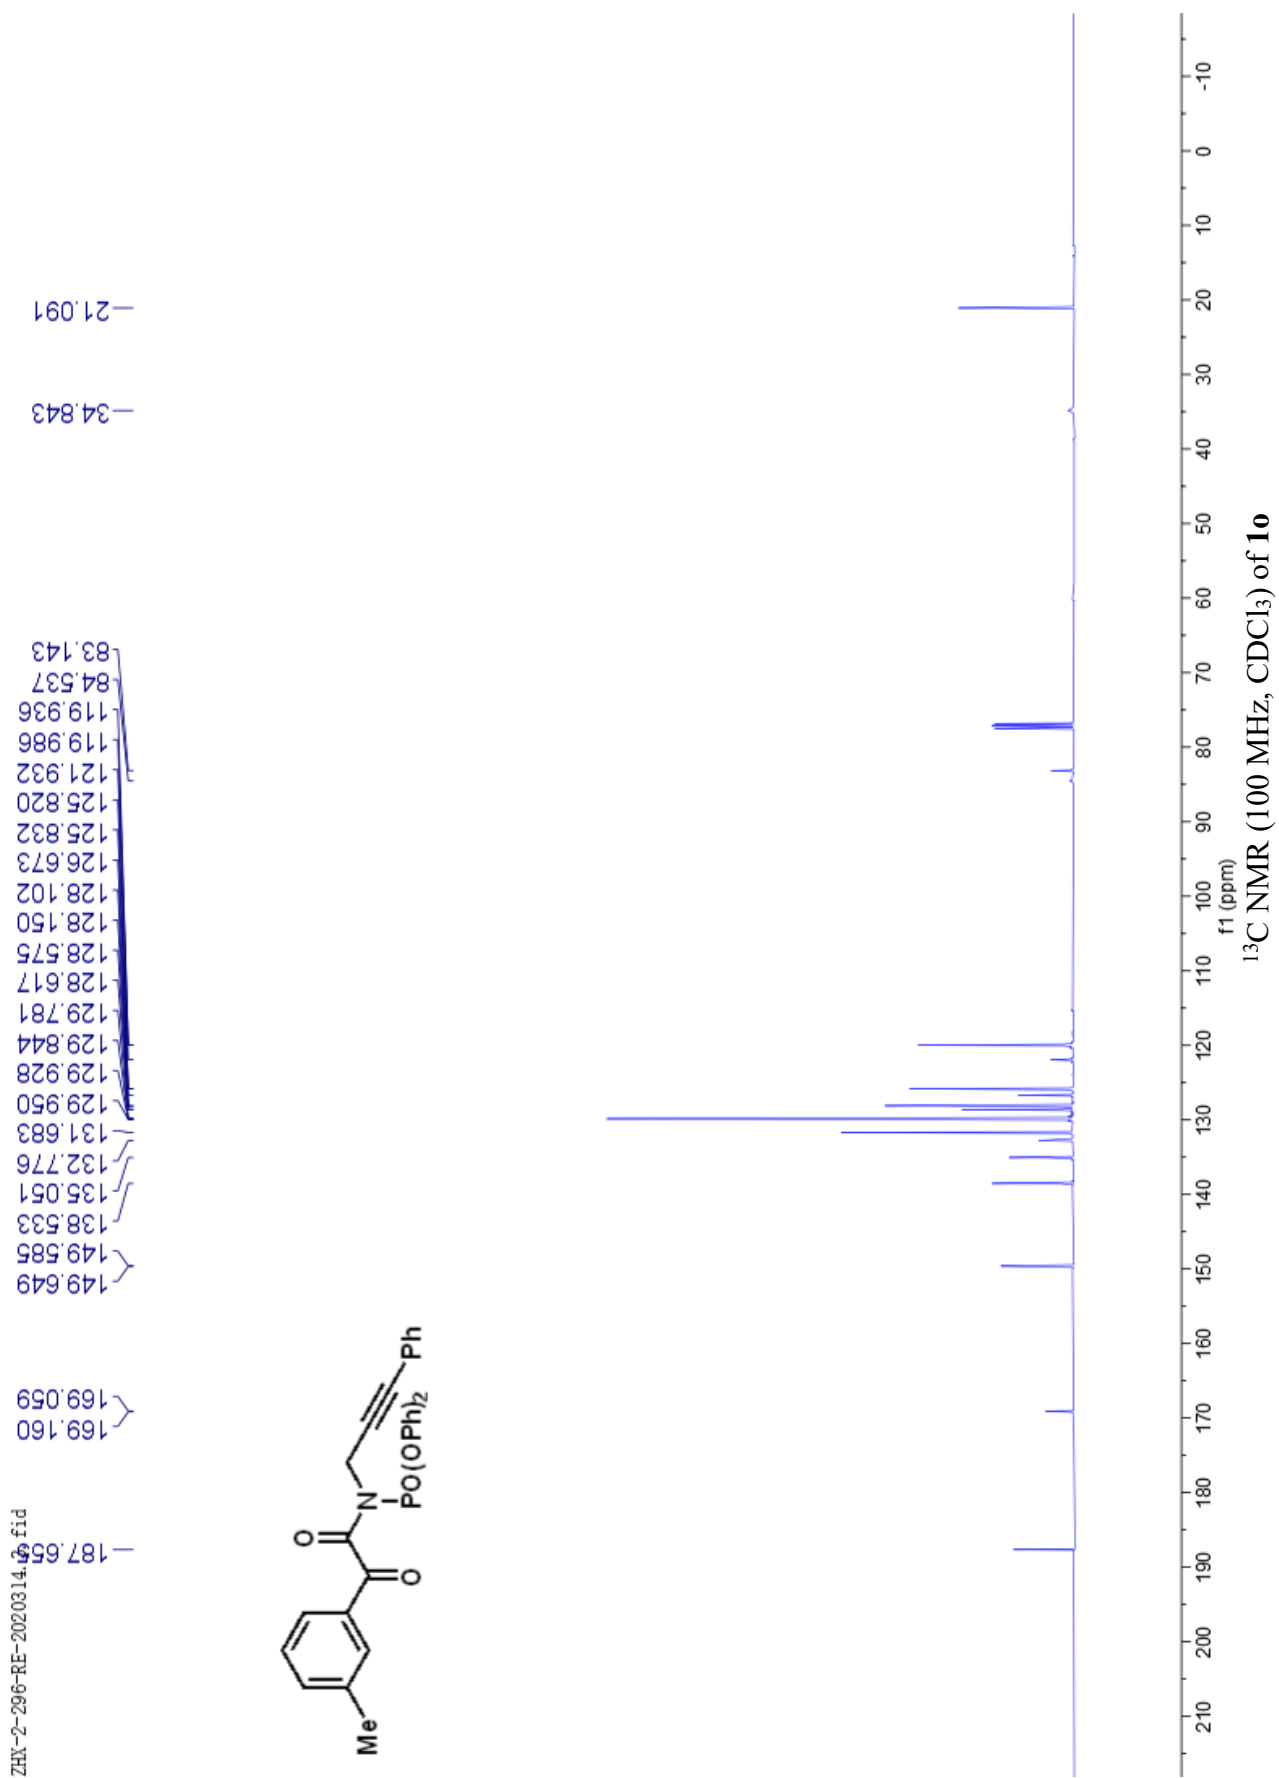



ZHX-2-296-RE-2020314\_2.fid

10.260

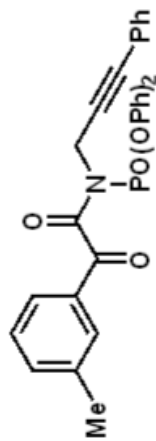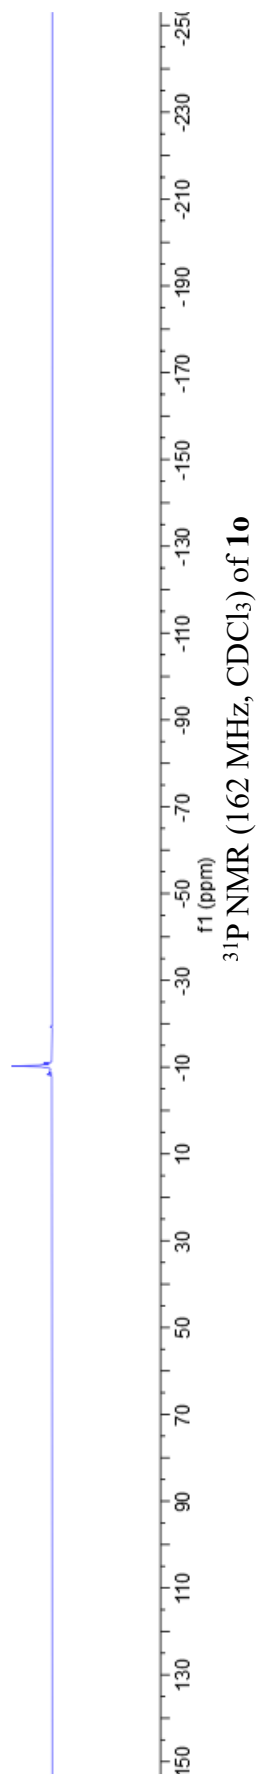

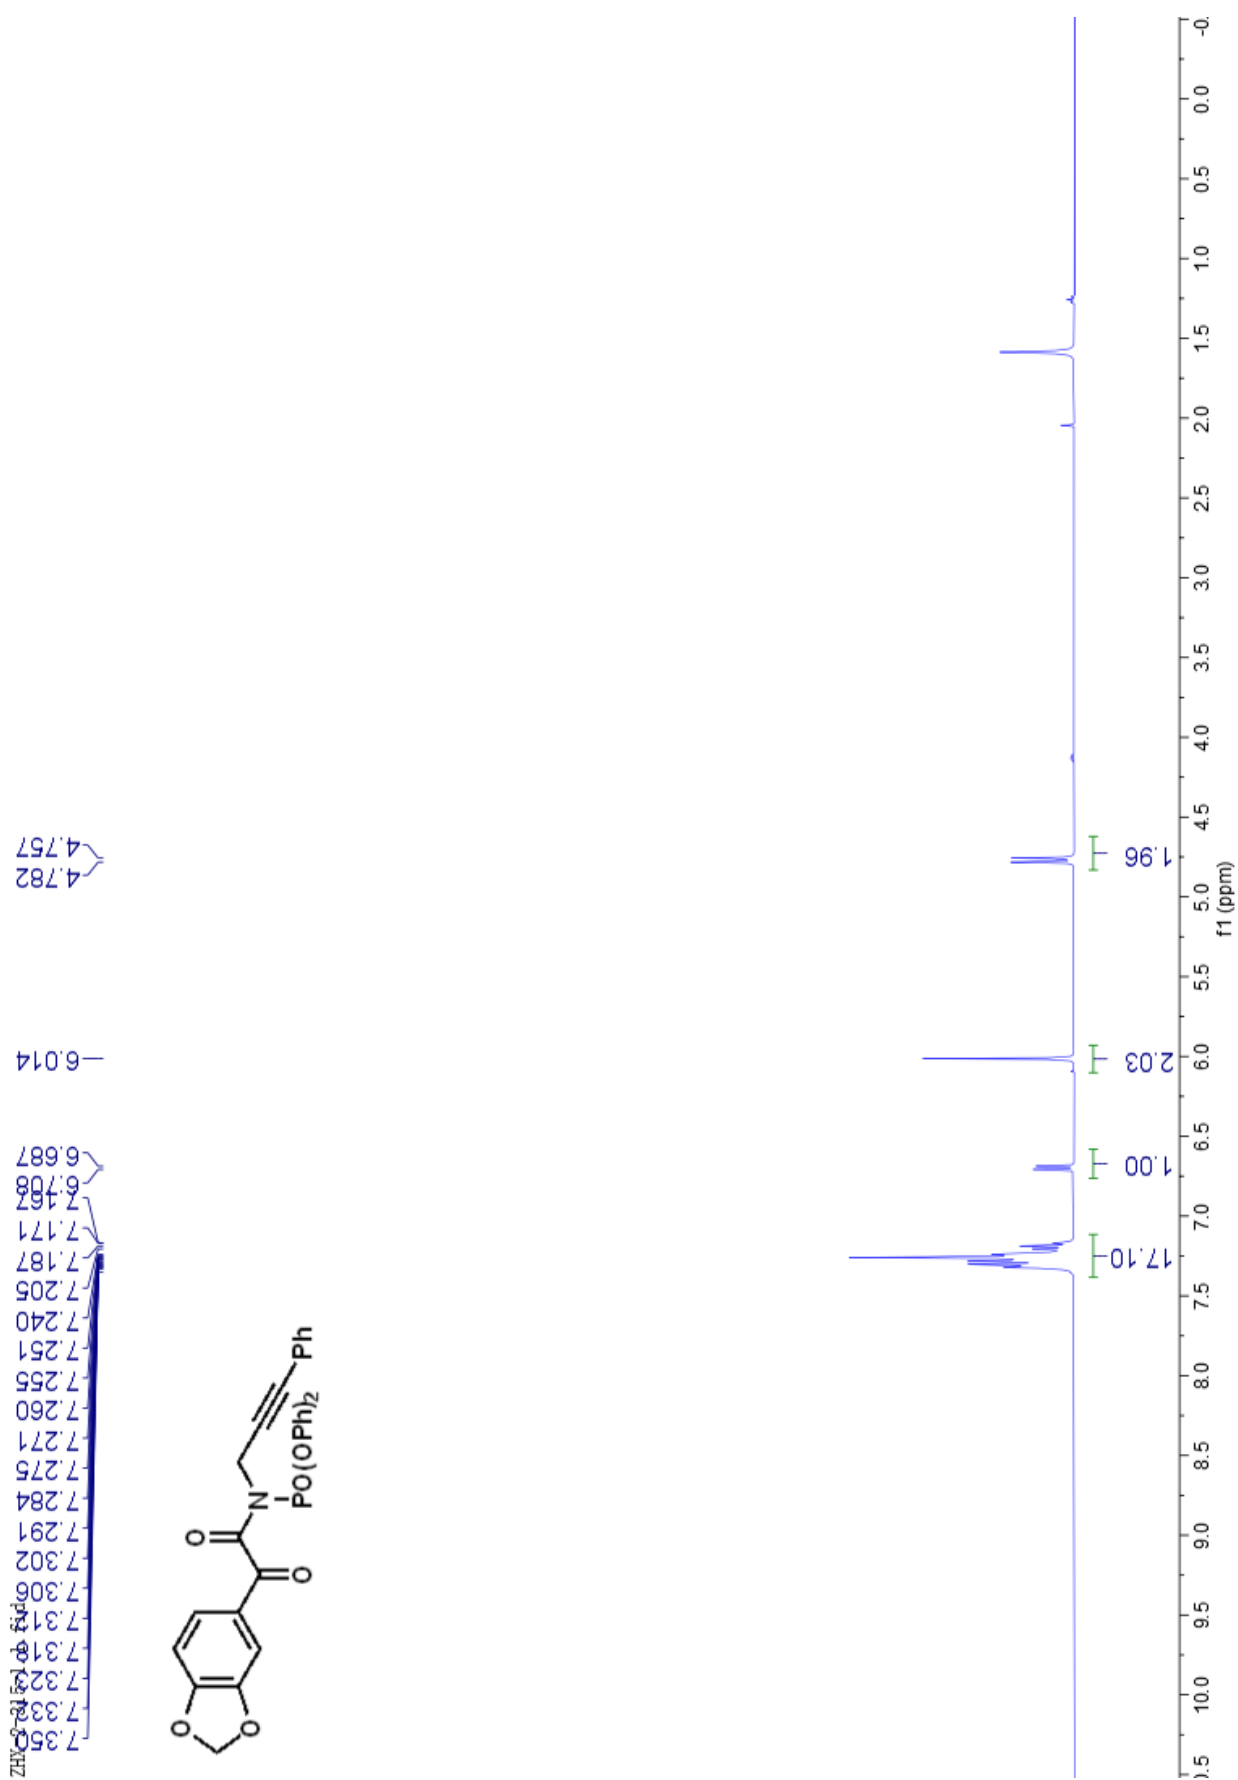

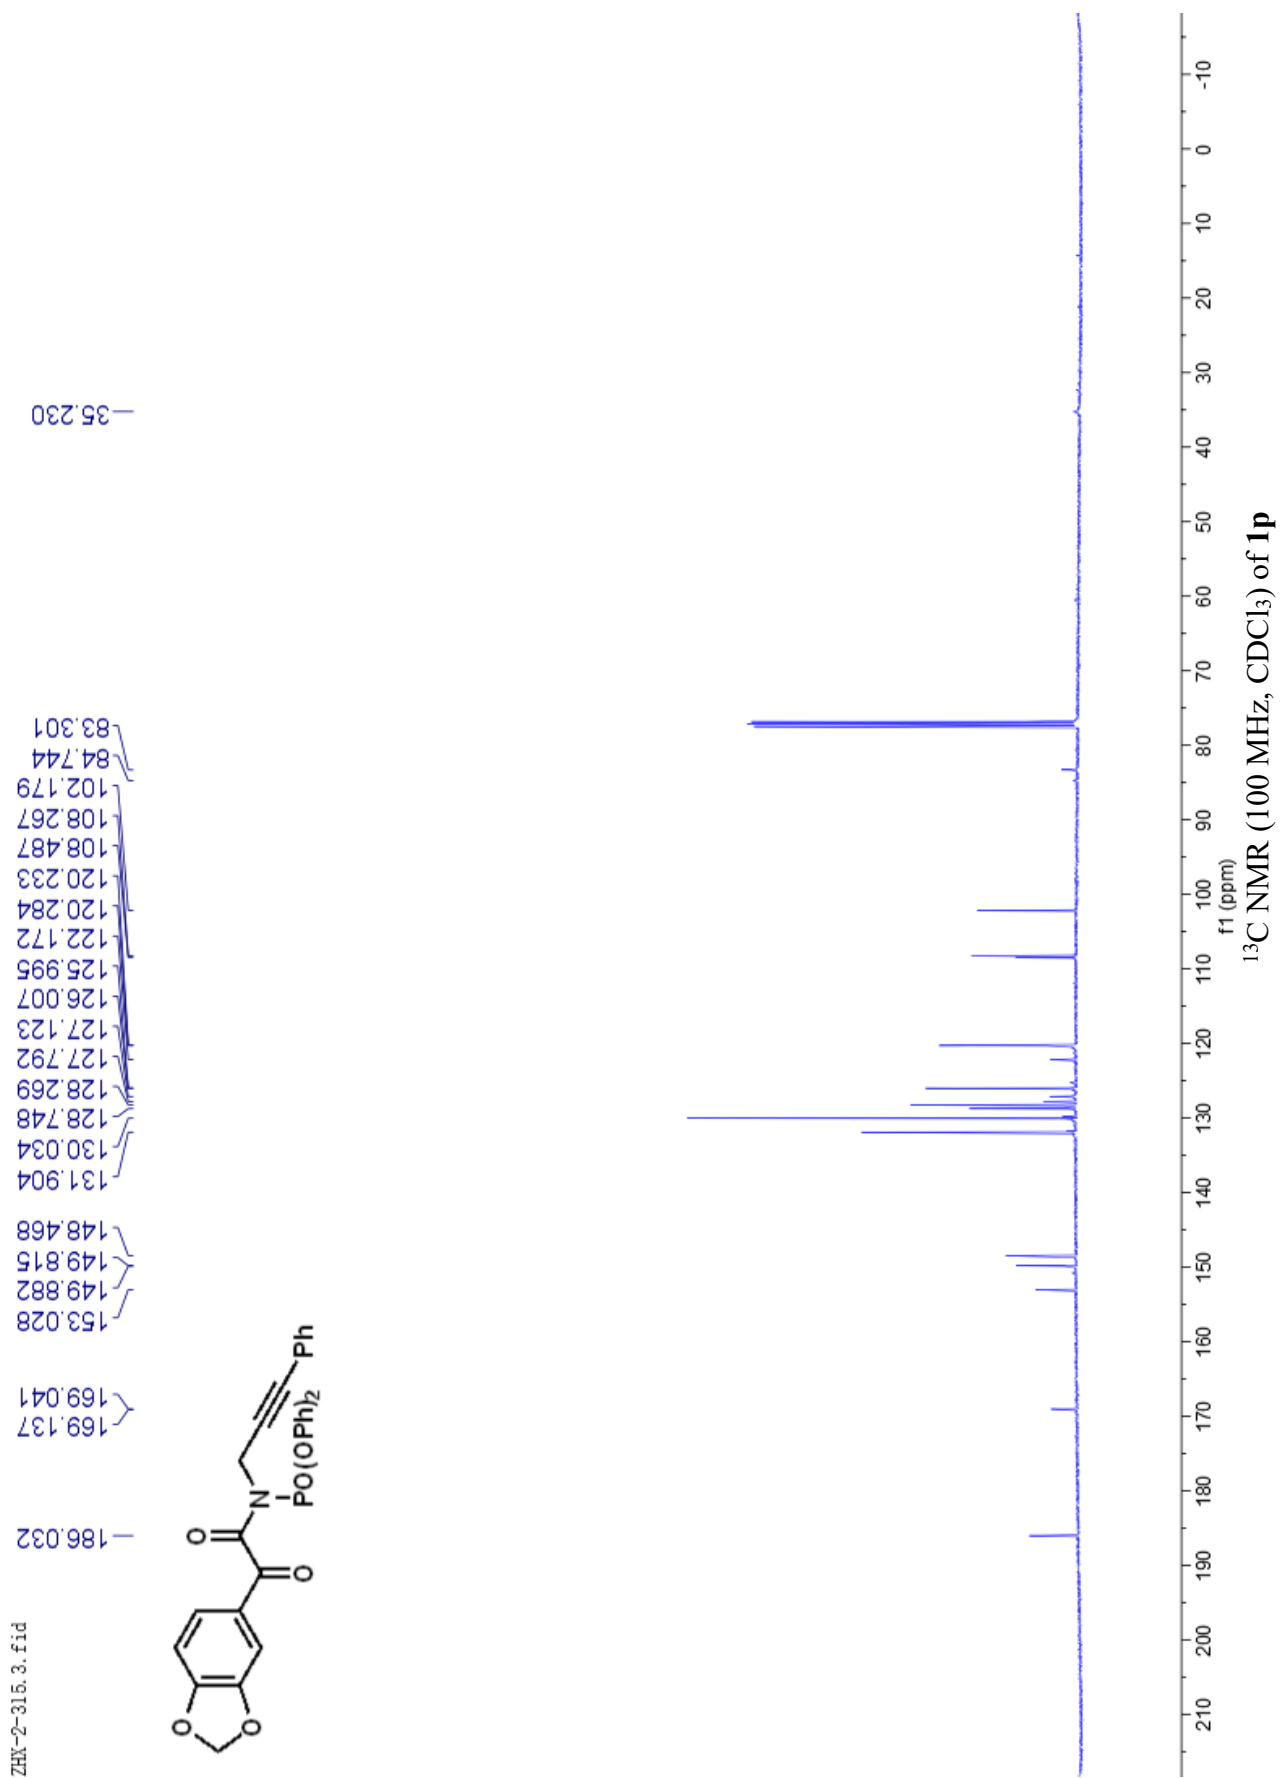

ZHX-2-315\_1.fid

-10.303

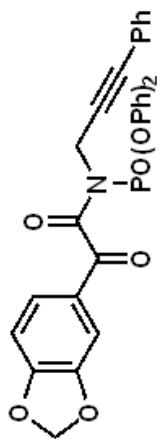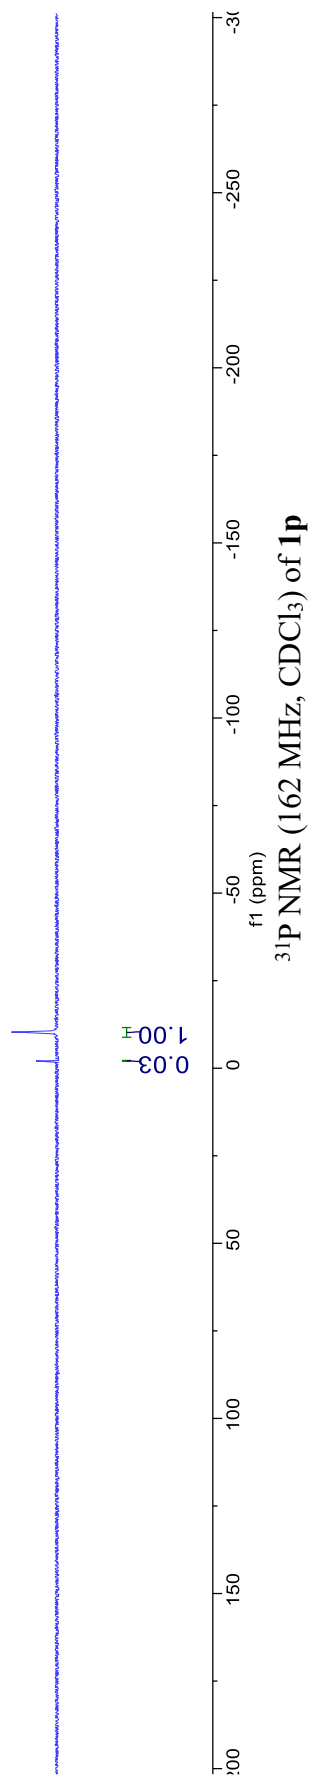

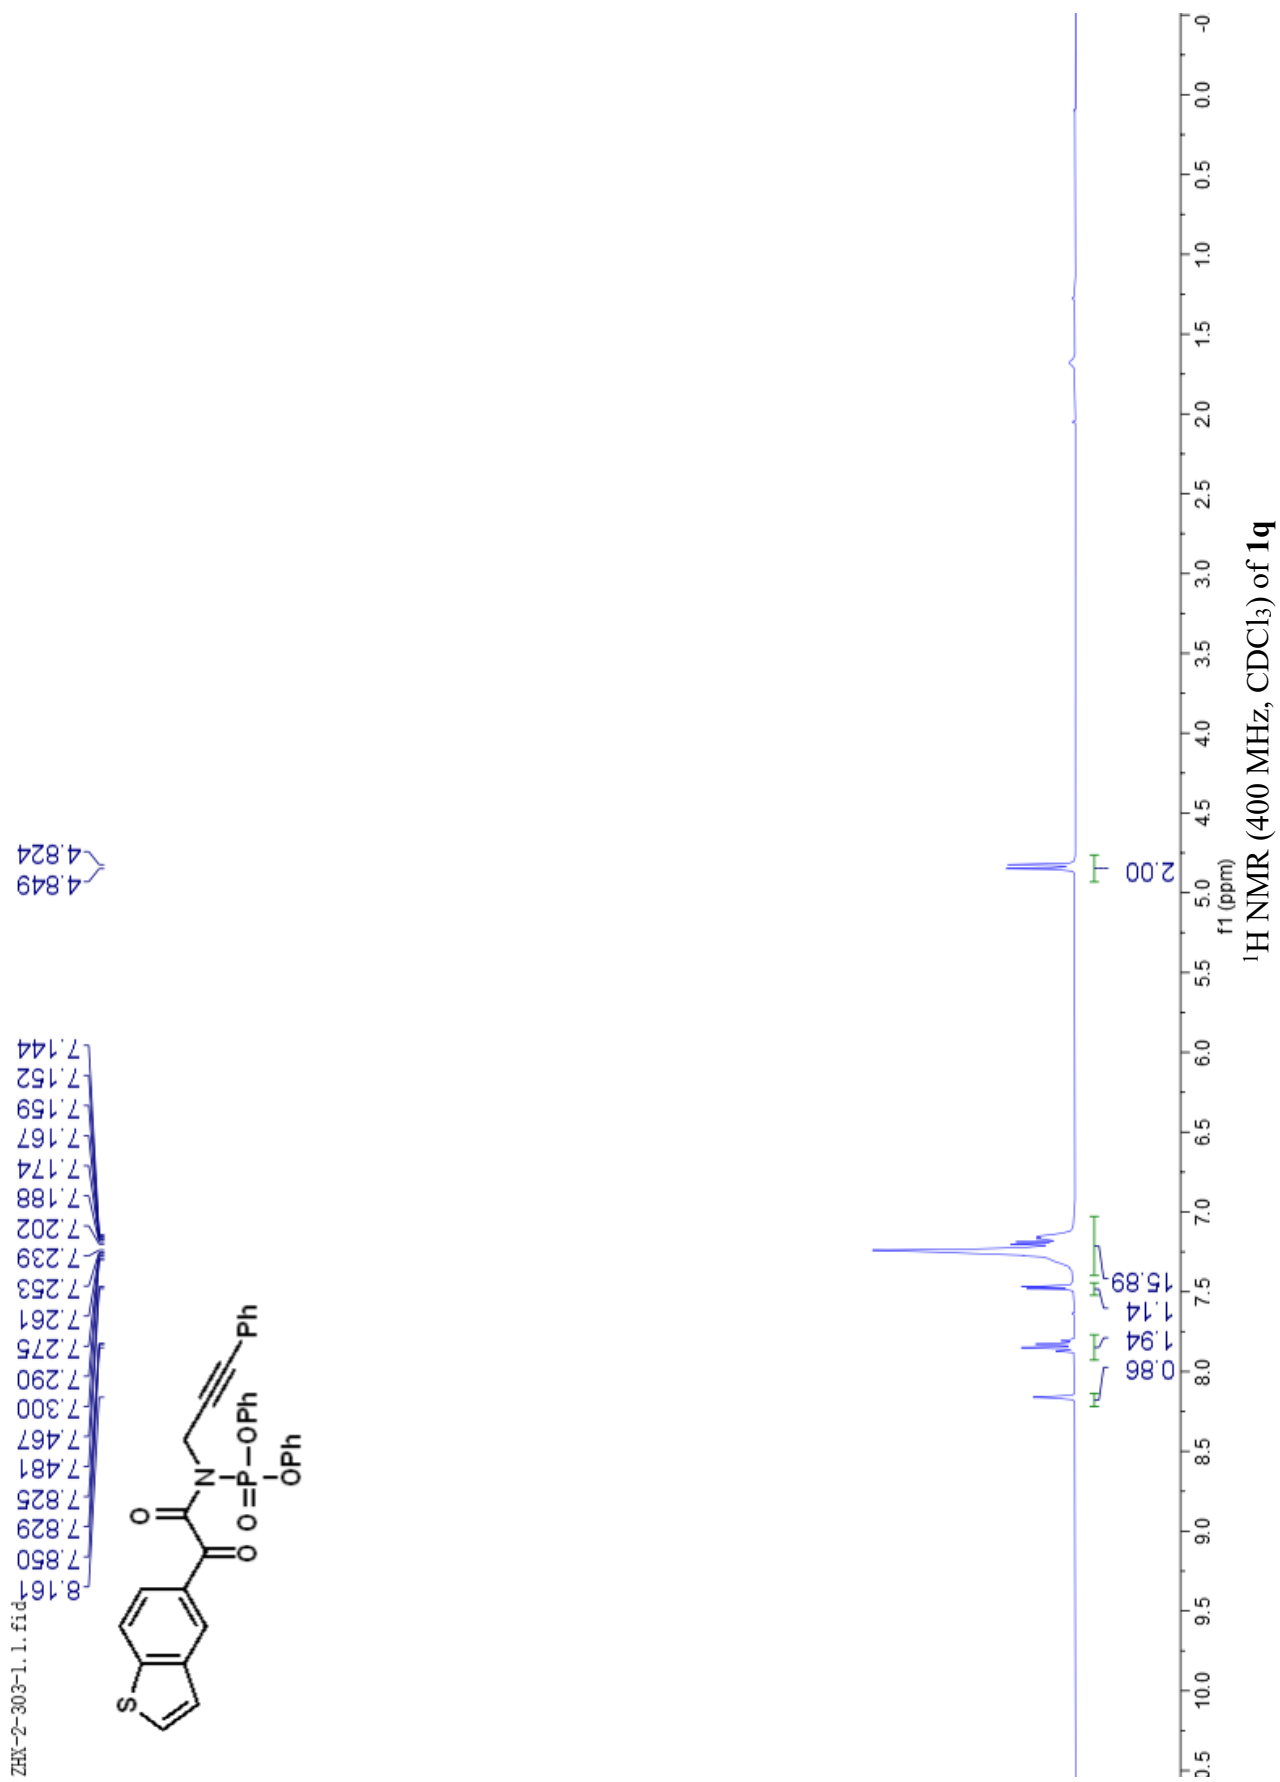

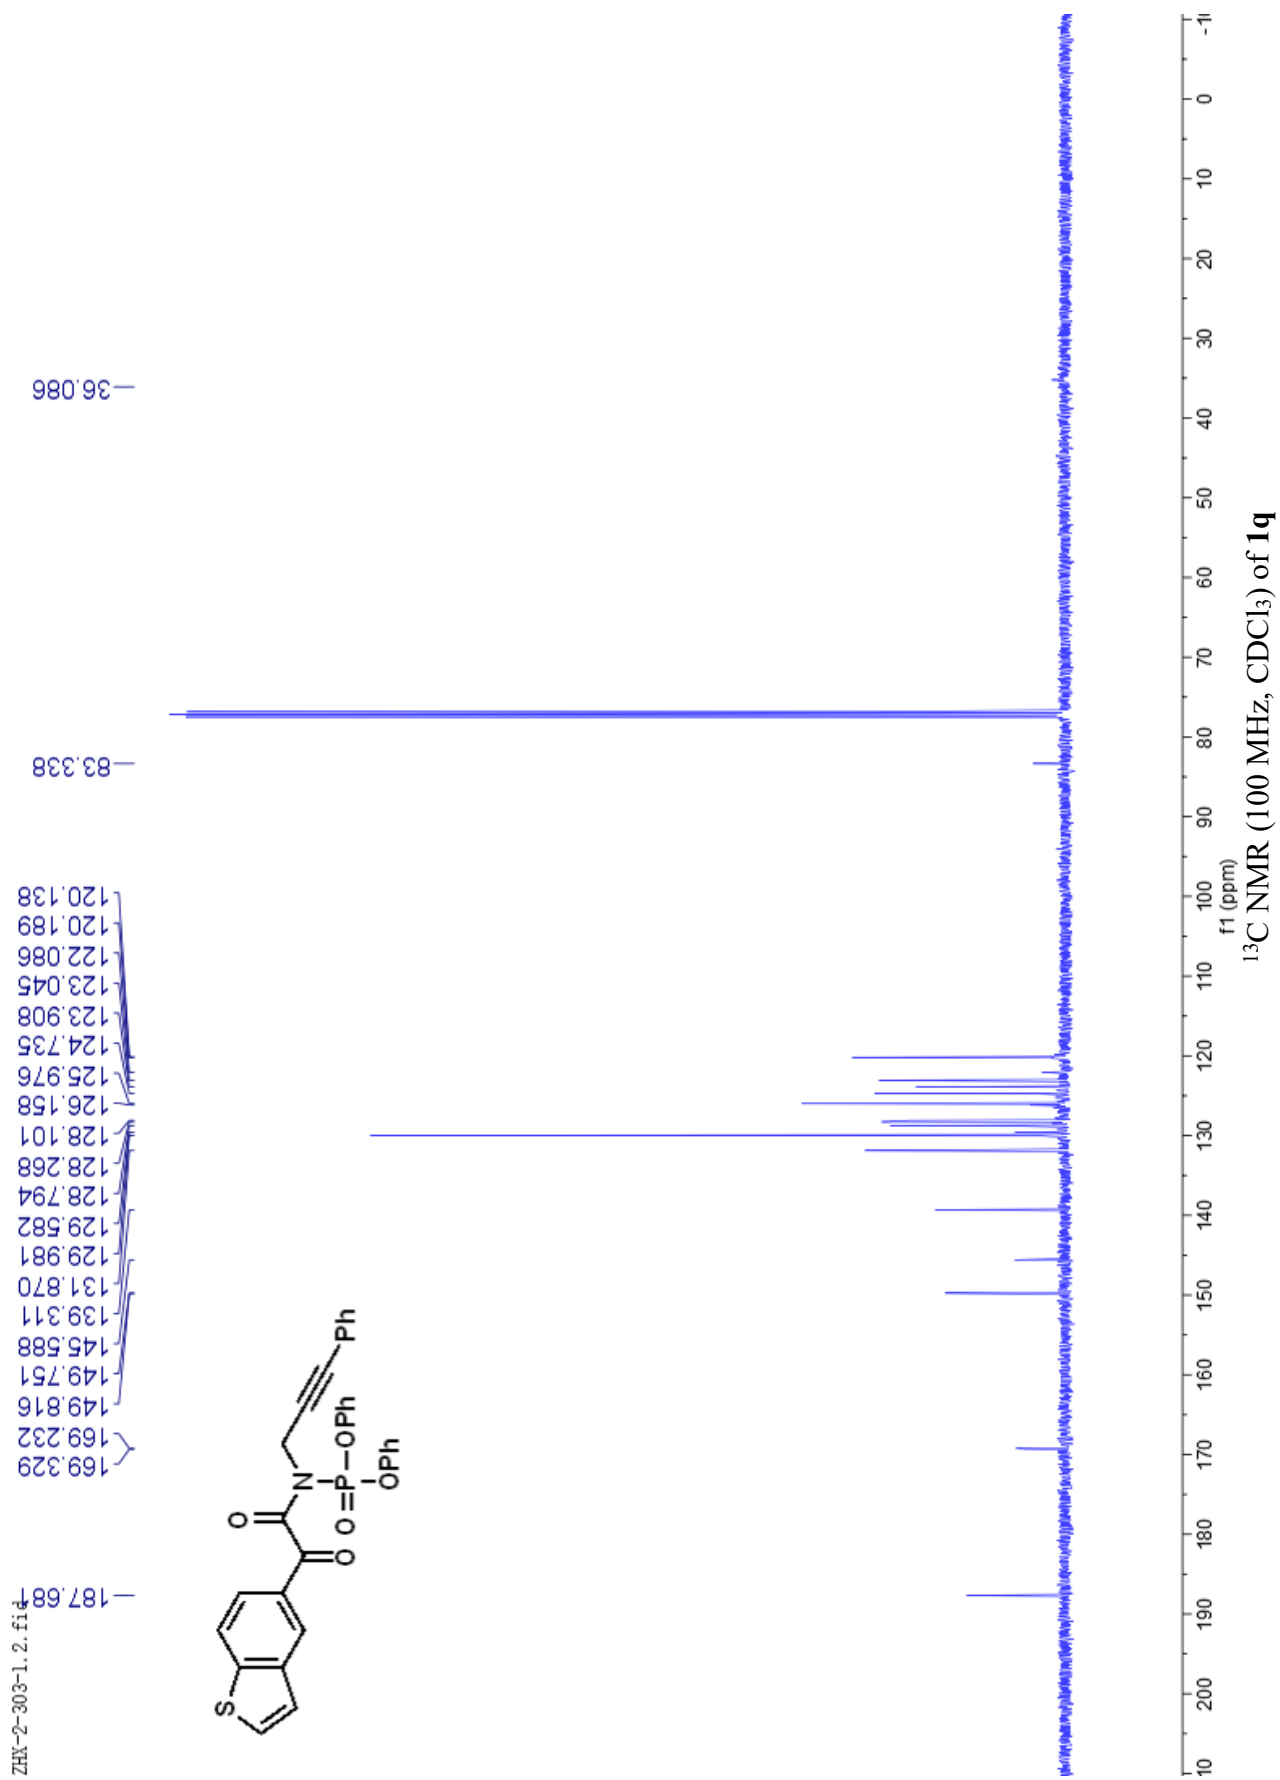

ZHX-2-303-31P. 1. fid

--10.298

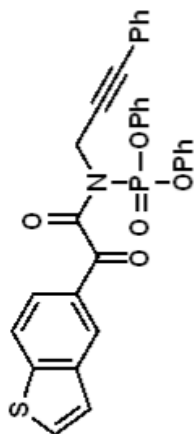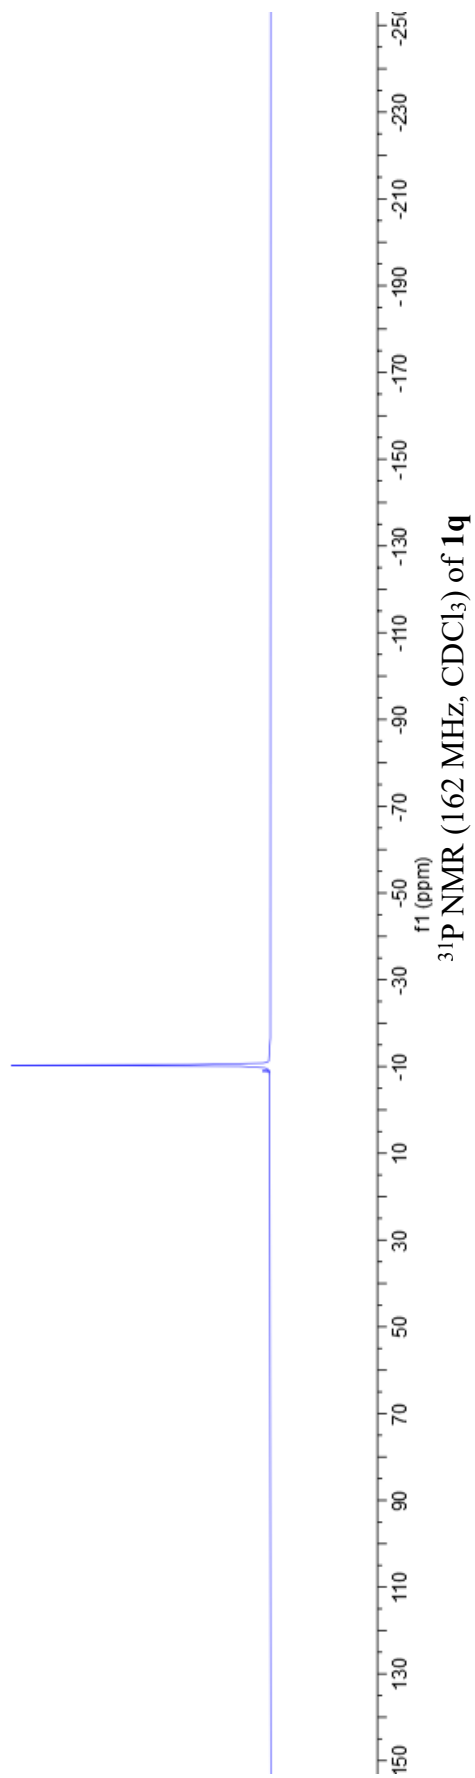

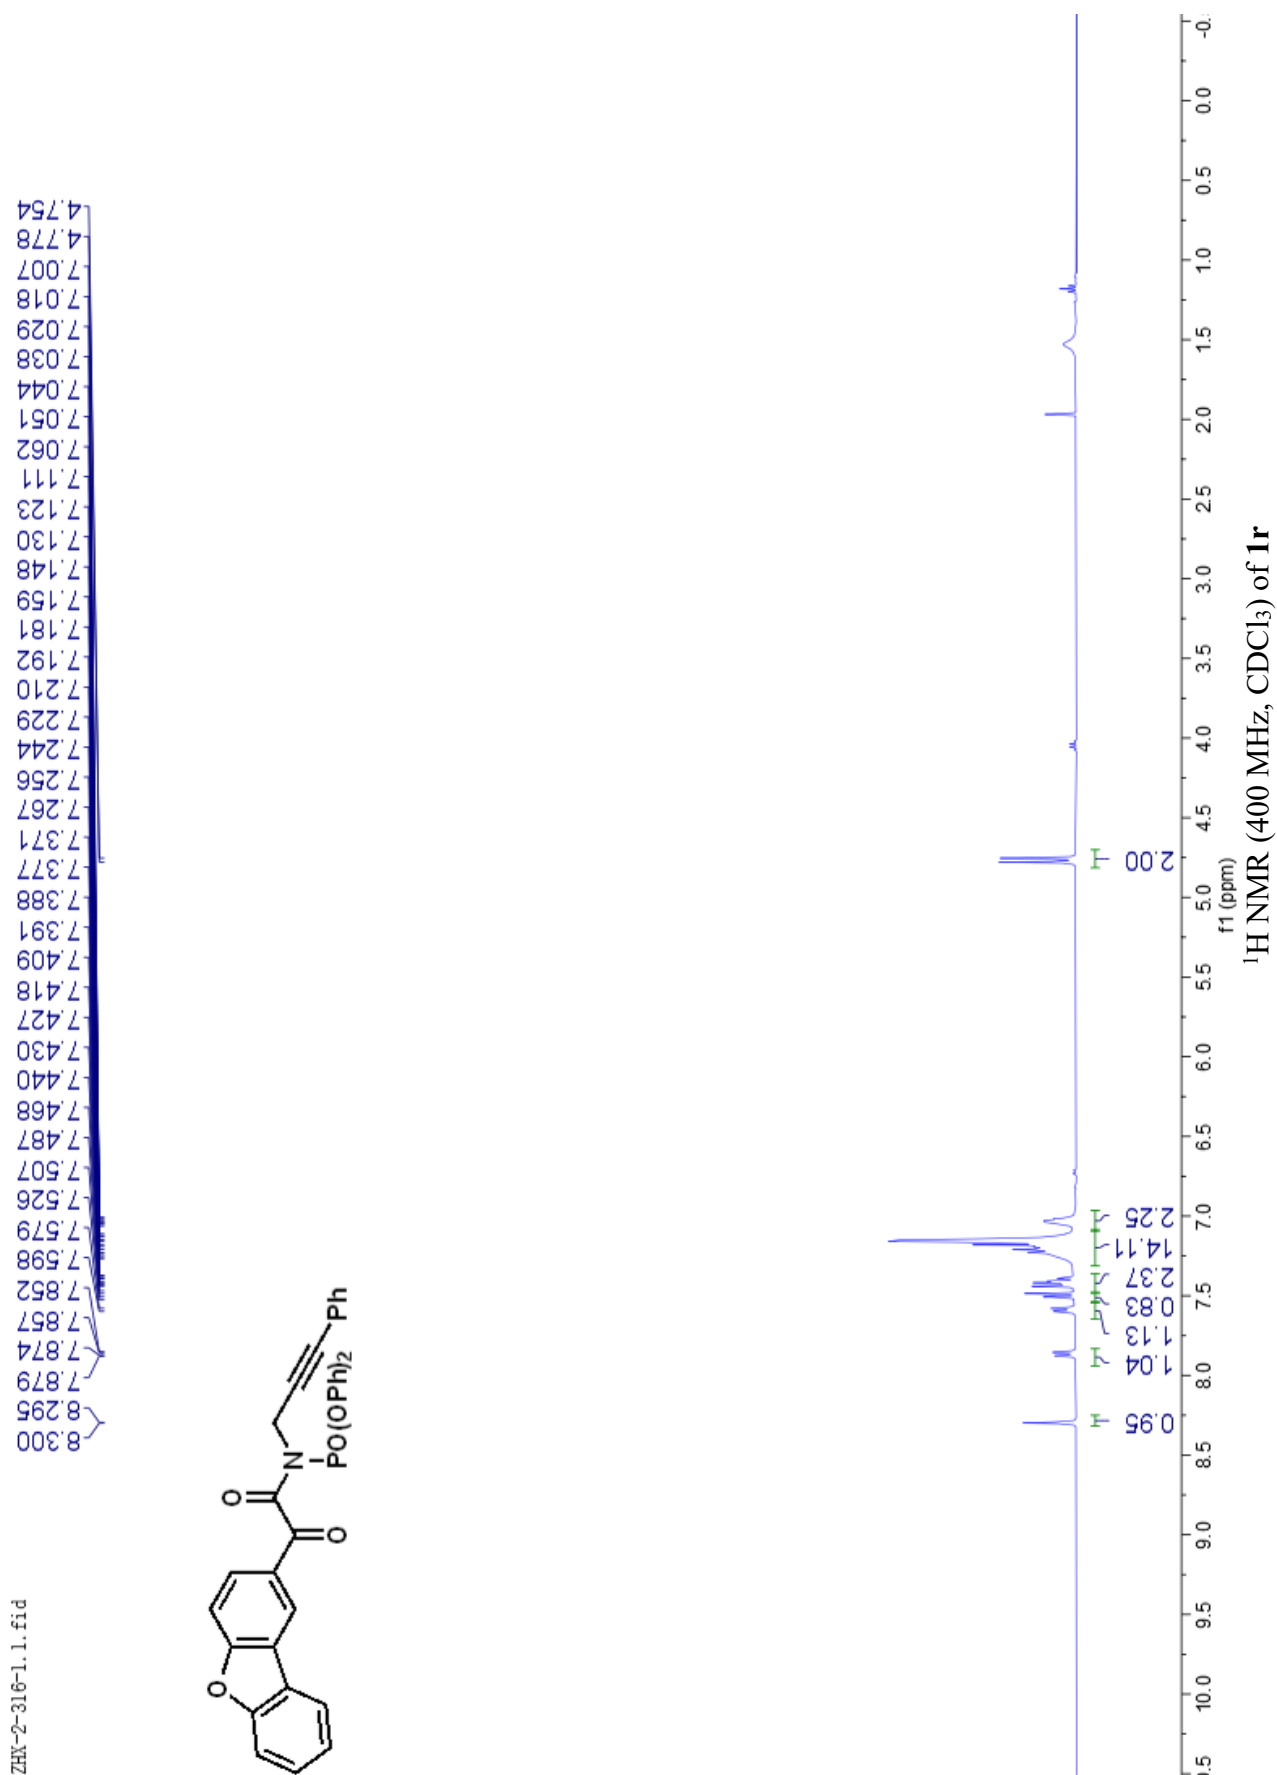



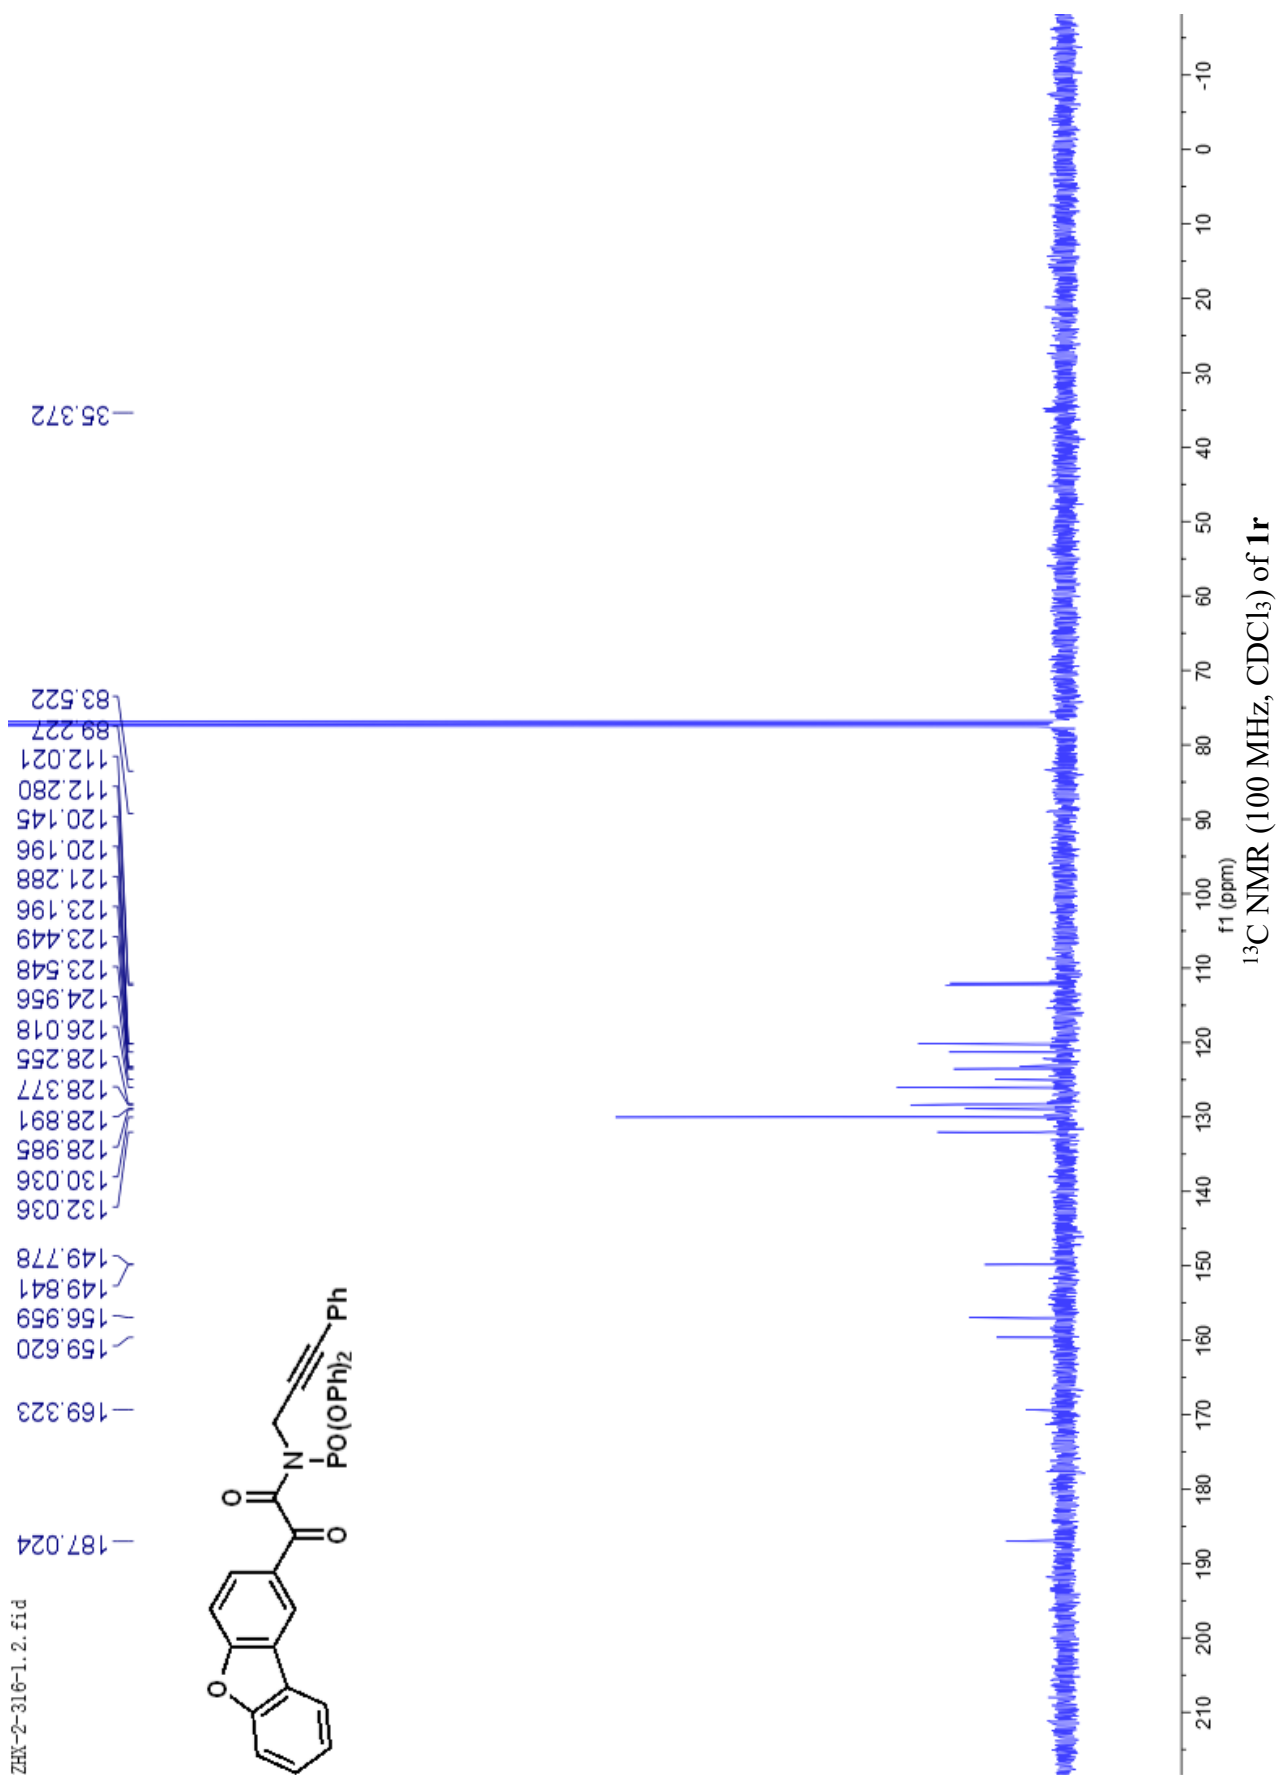

ZHY-2-316-P. 1. fid

--10.323

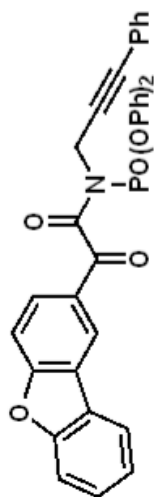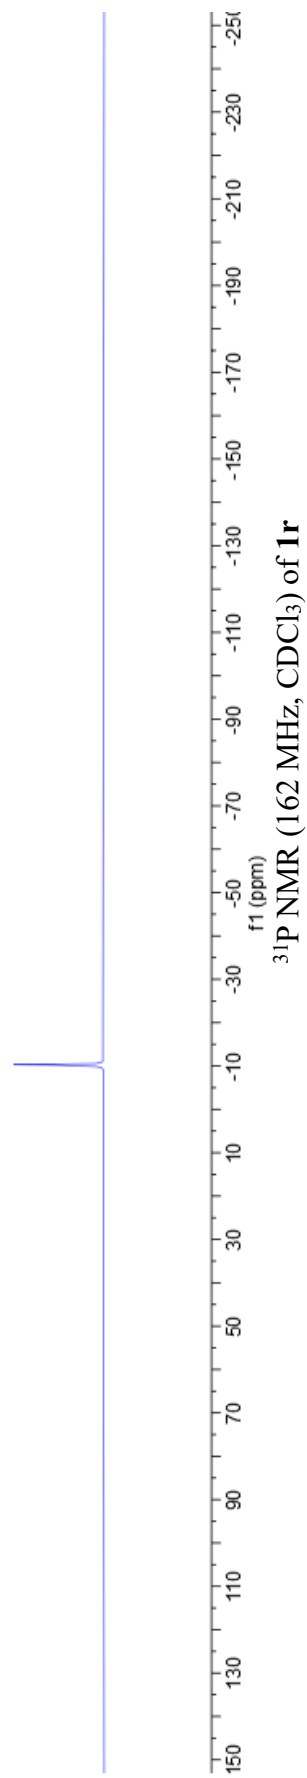

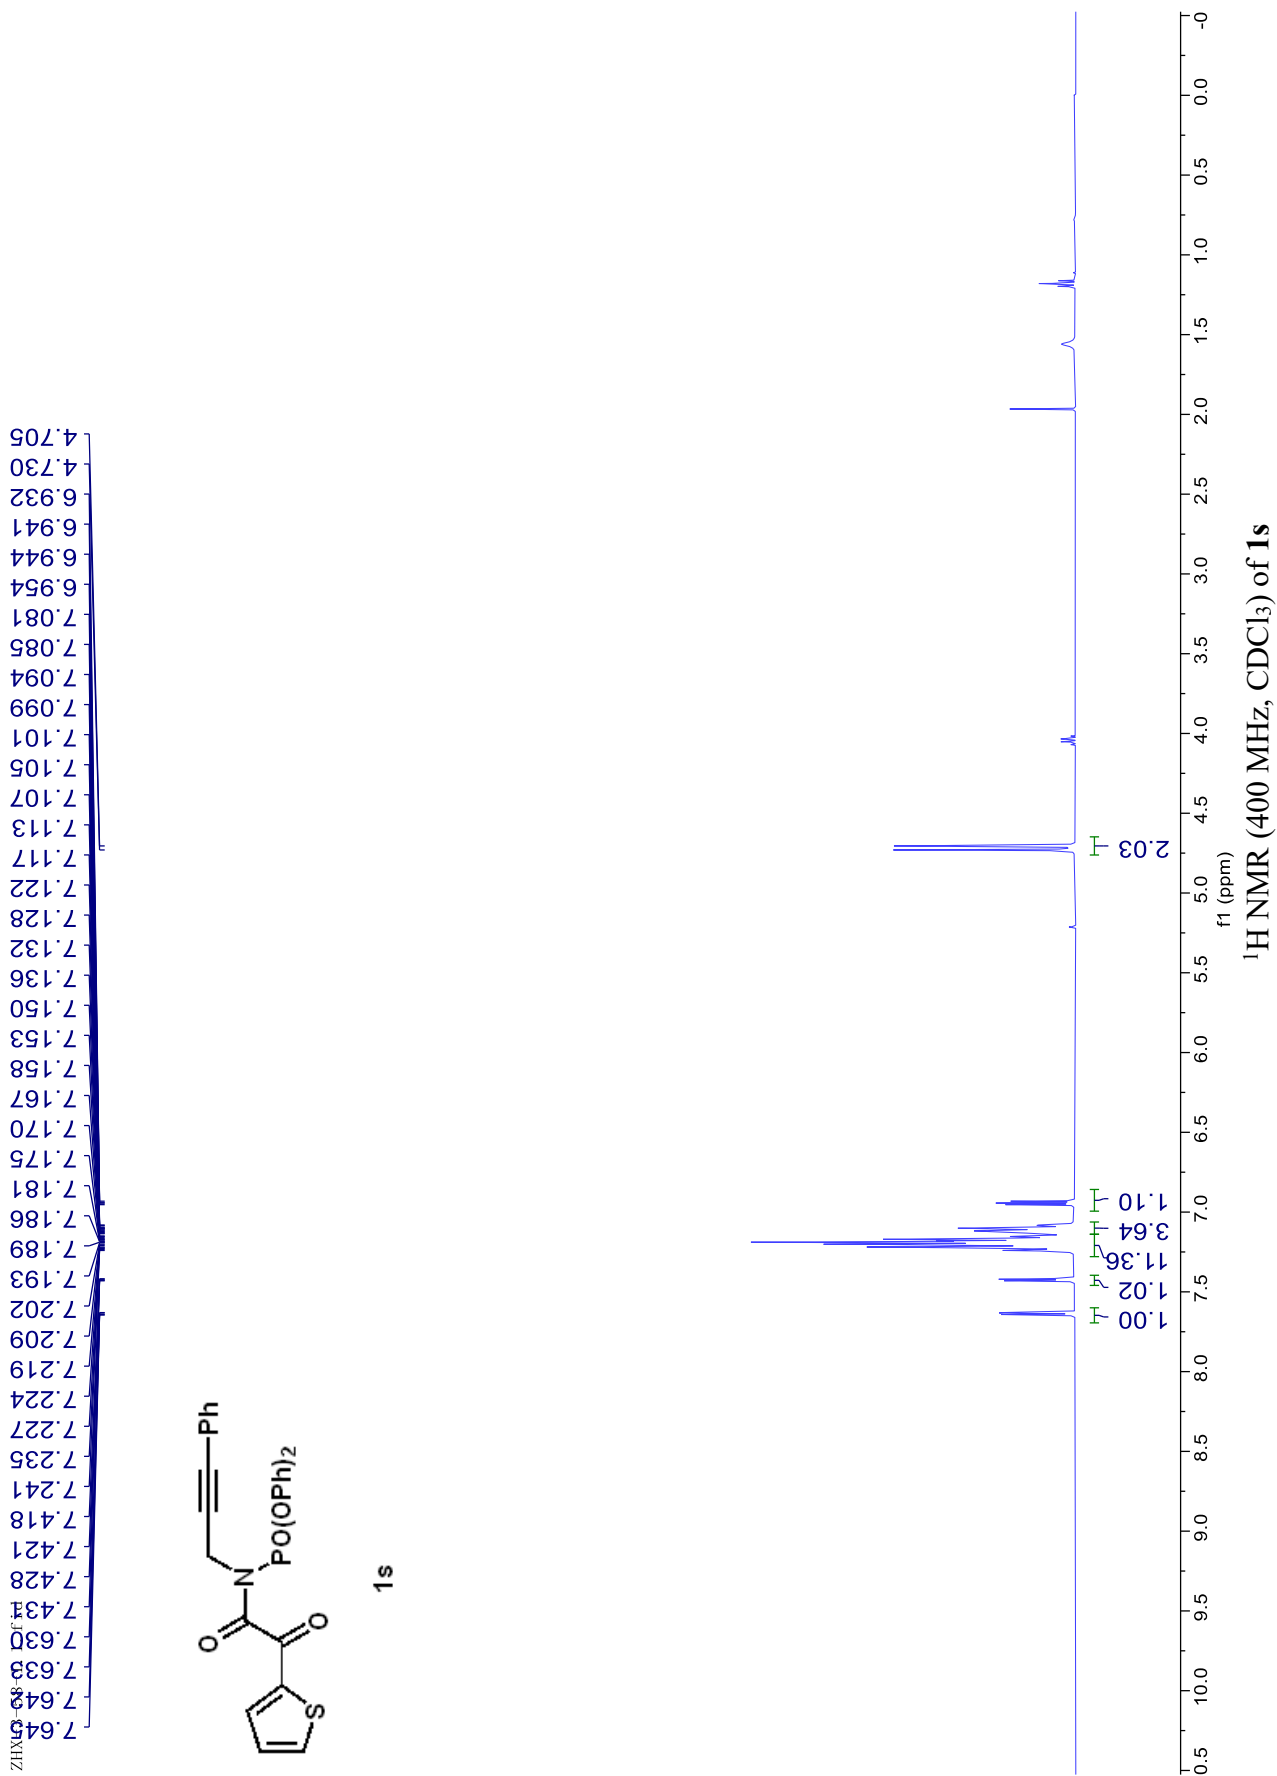

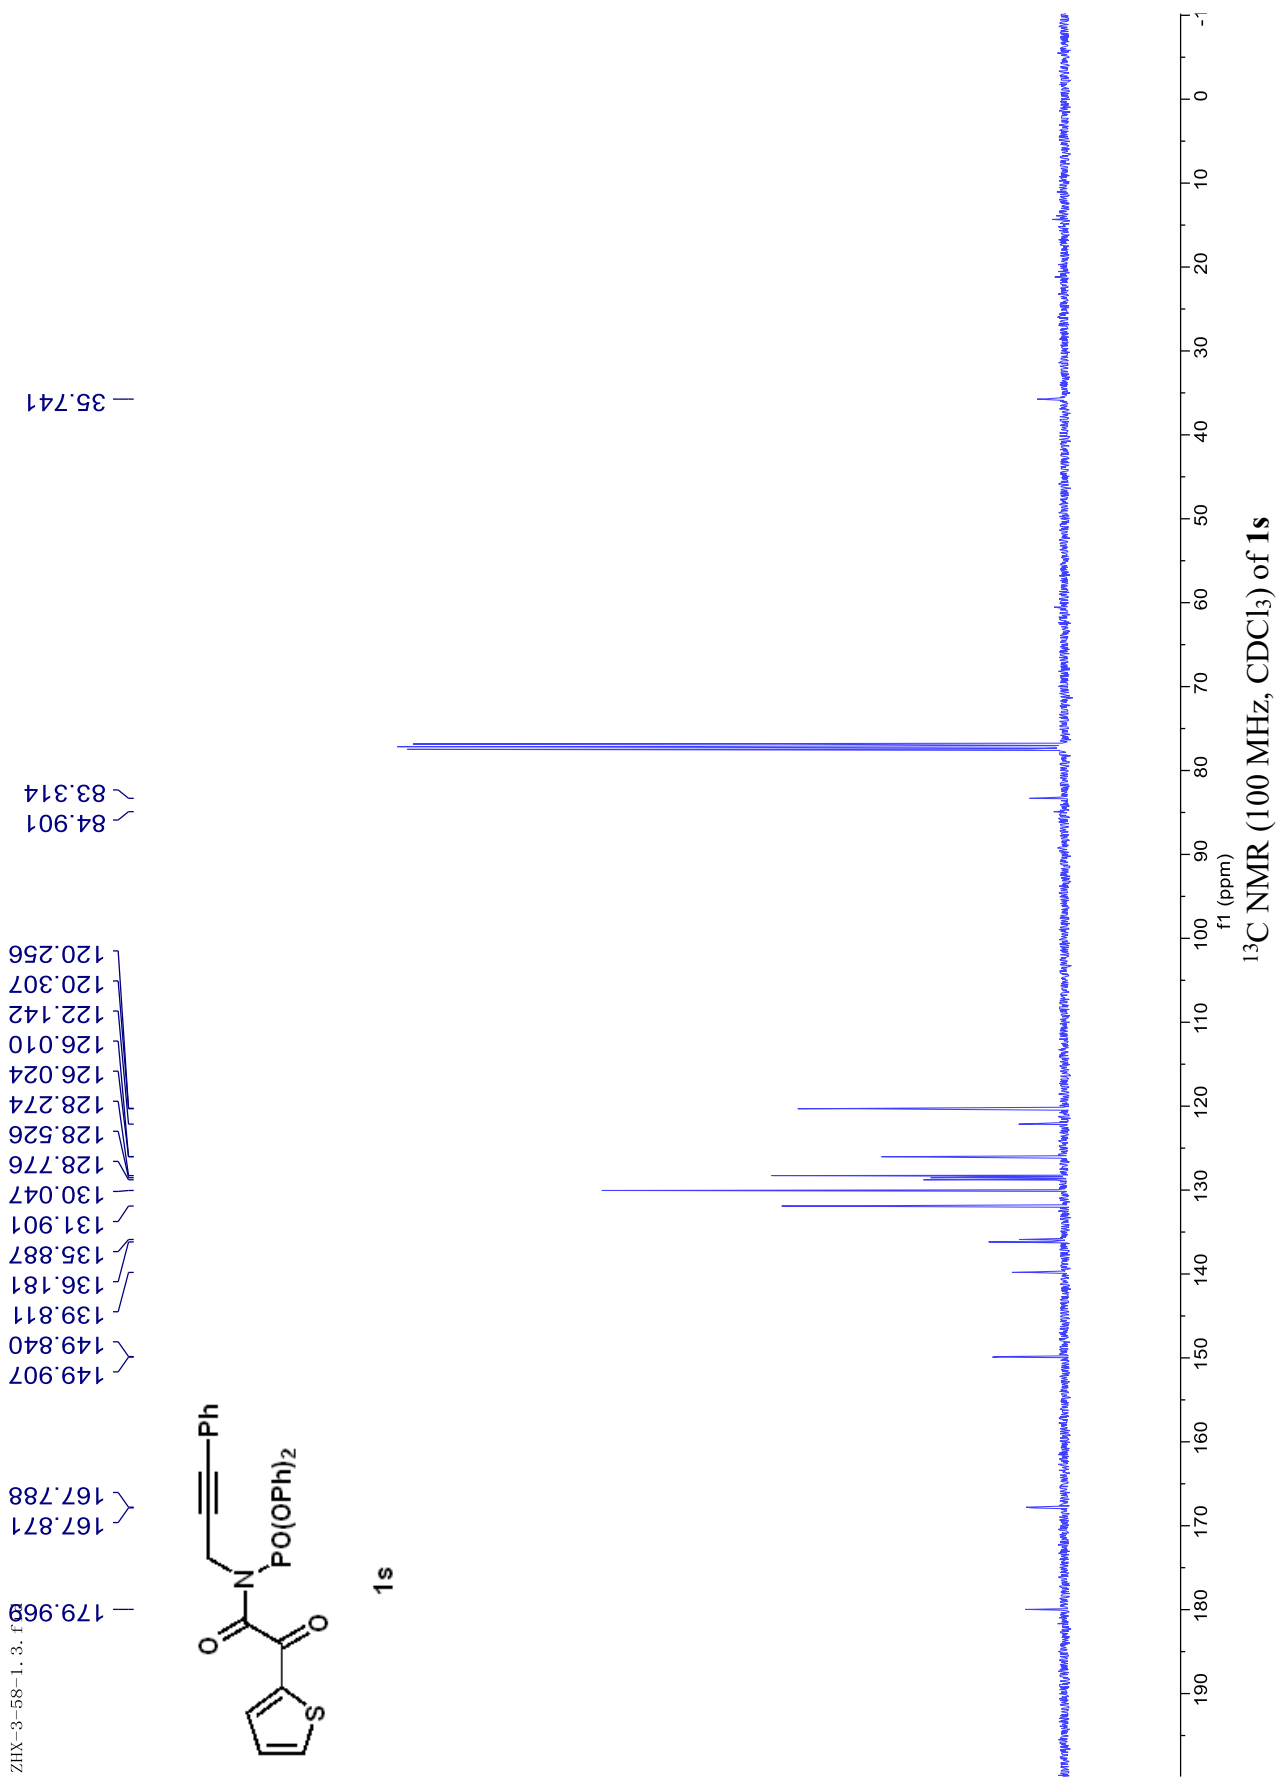

ZHX-3-58-1.2.fid

--10.203

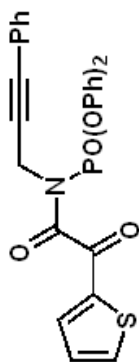

1s

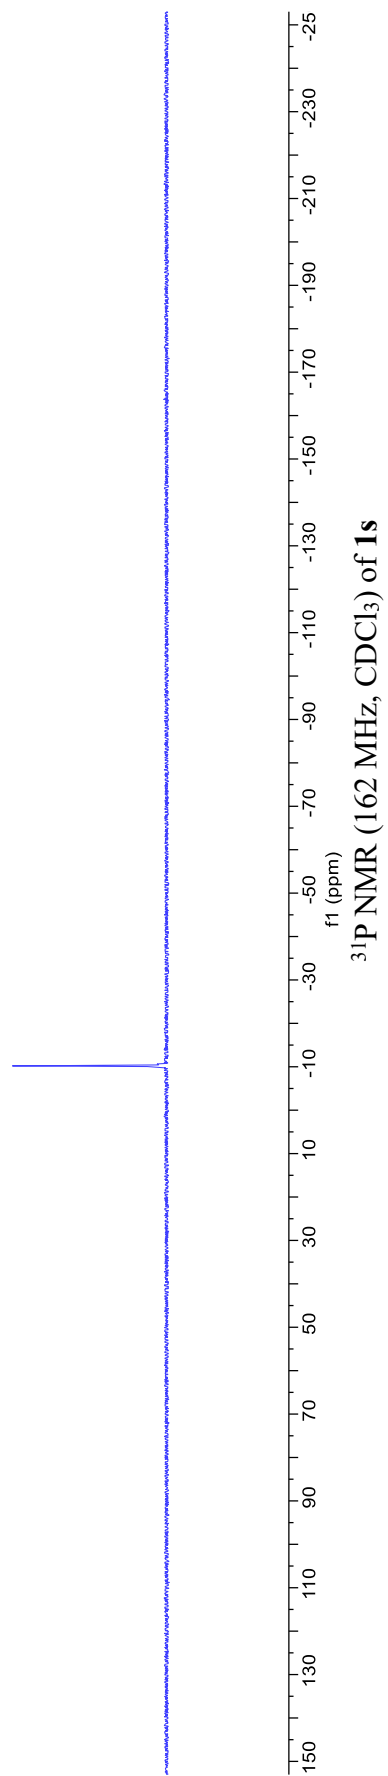

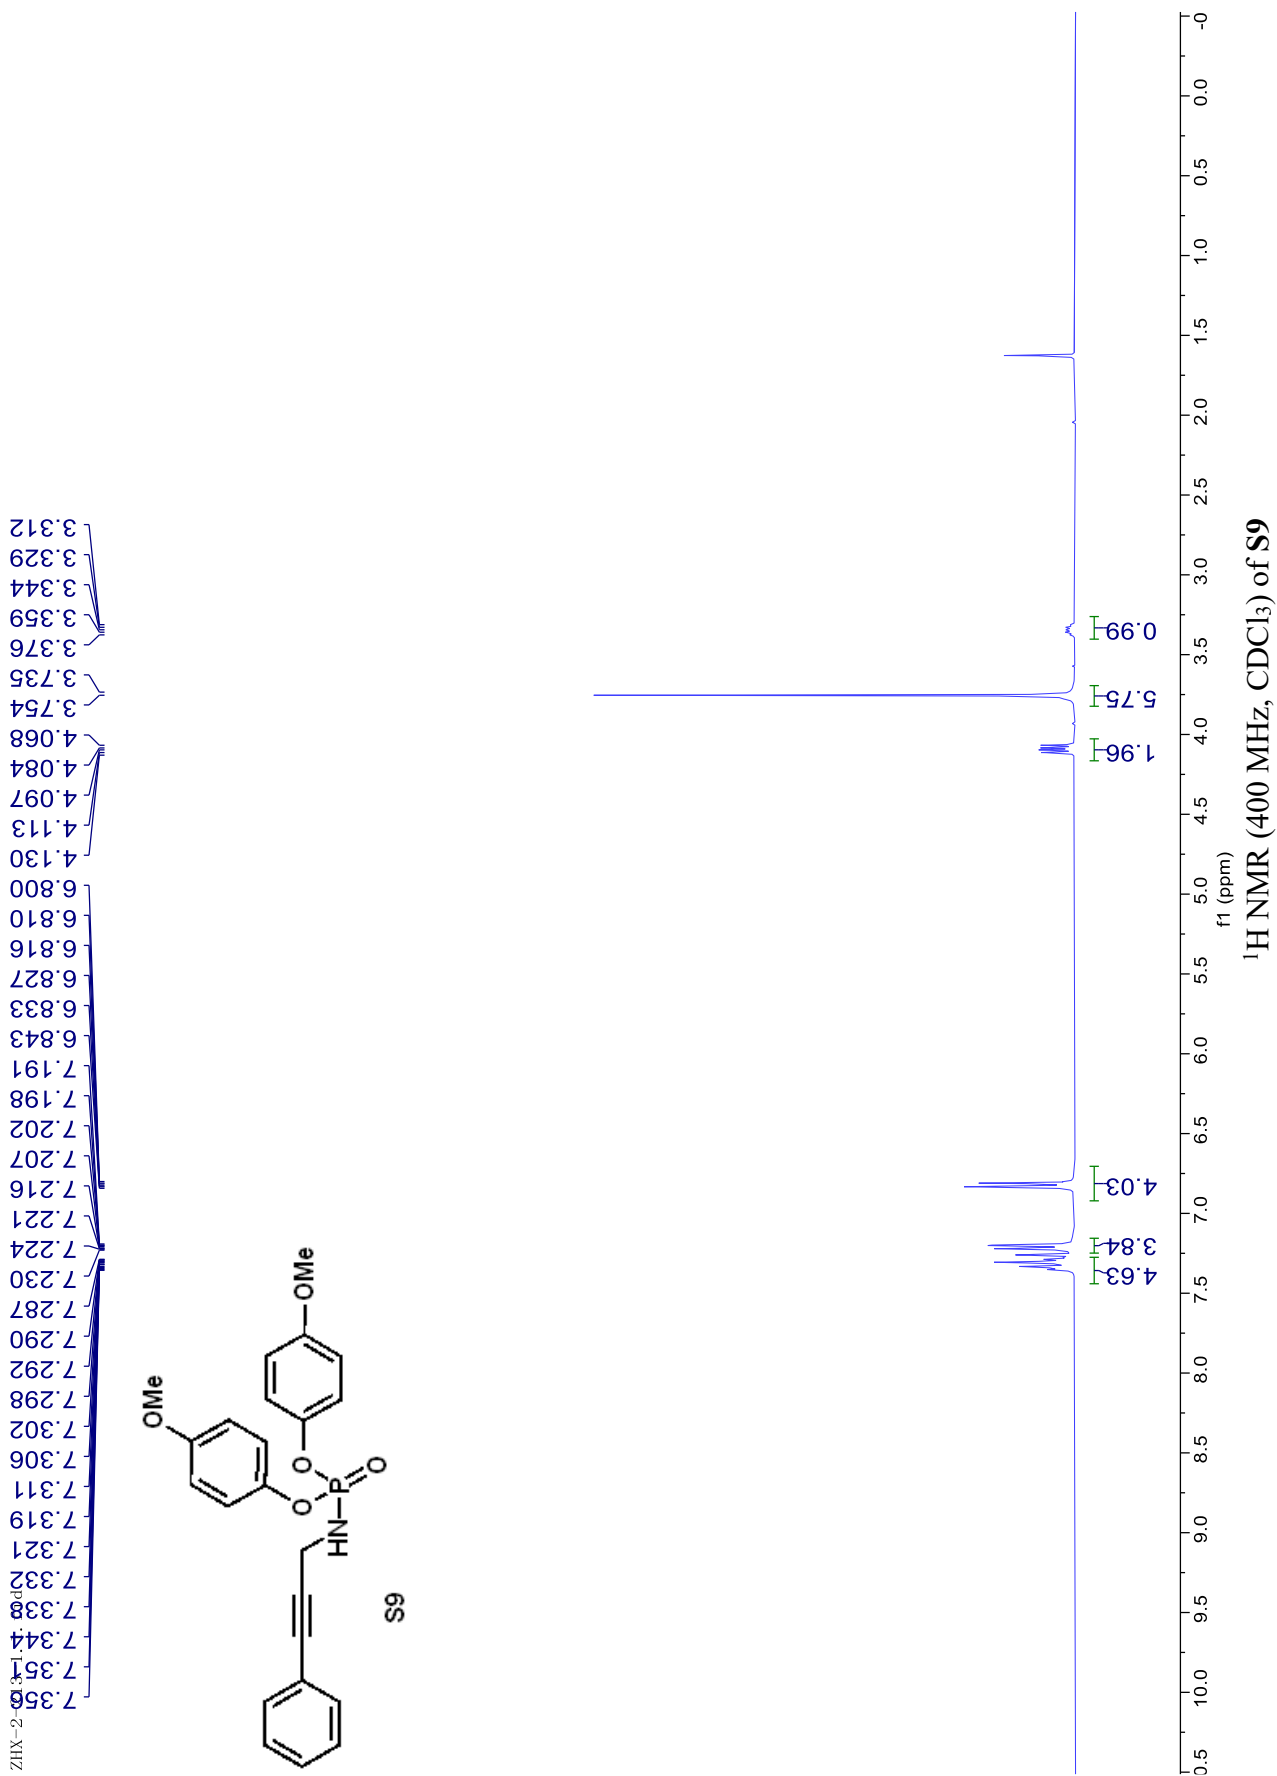

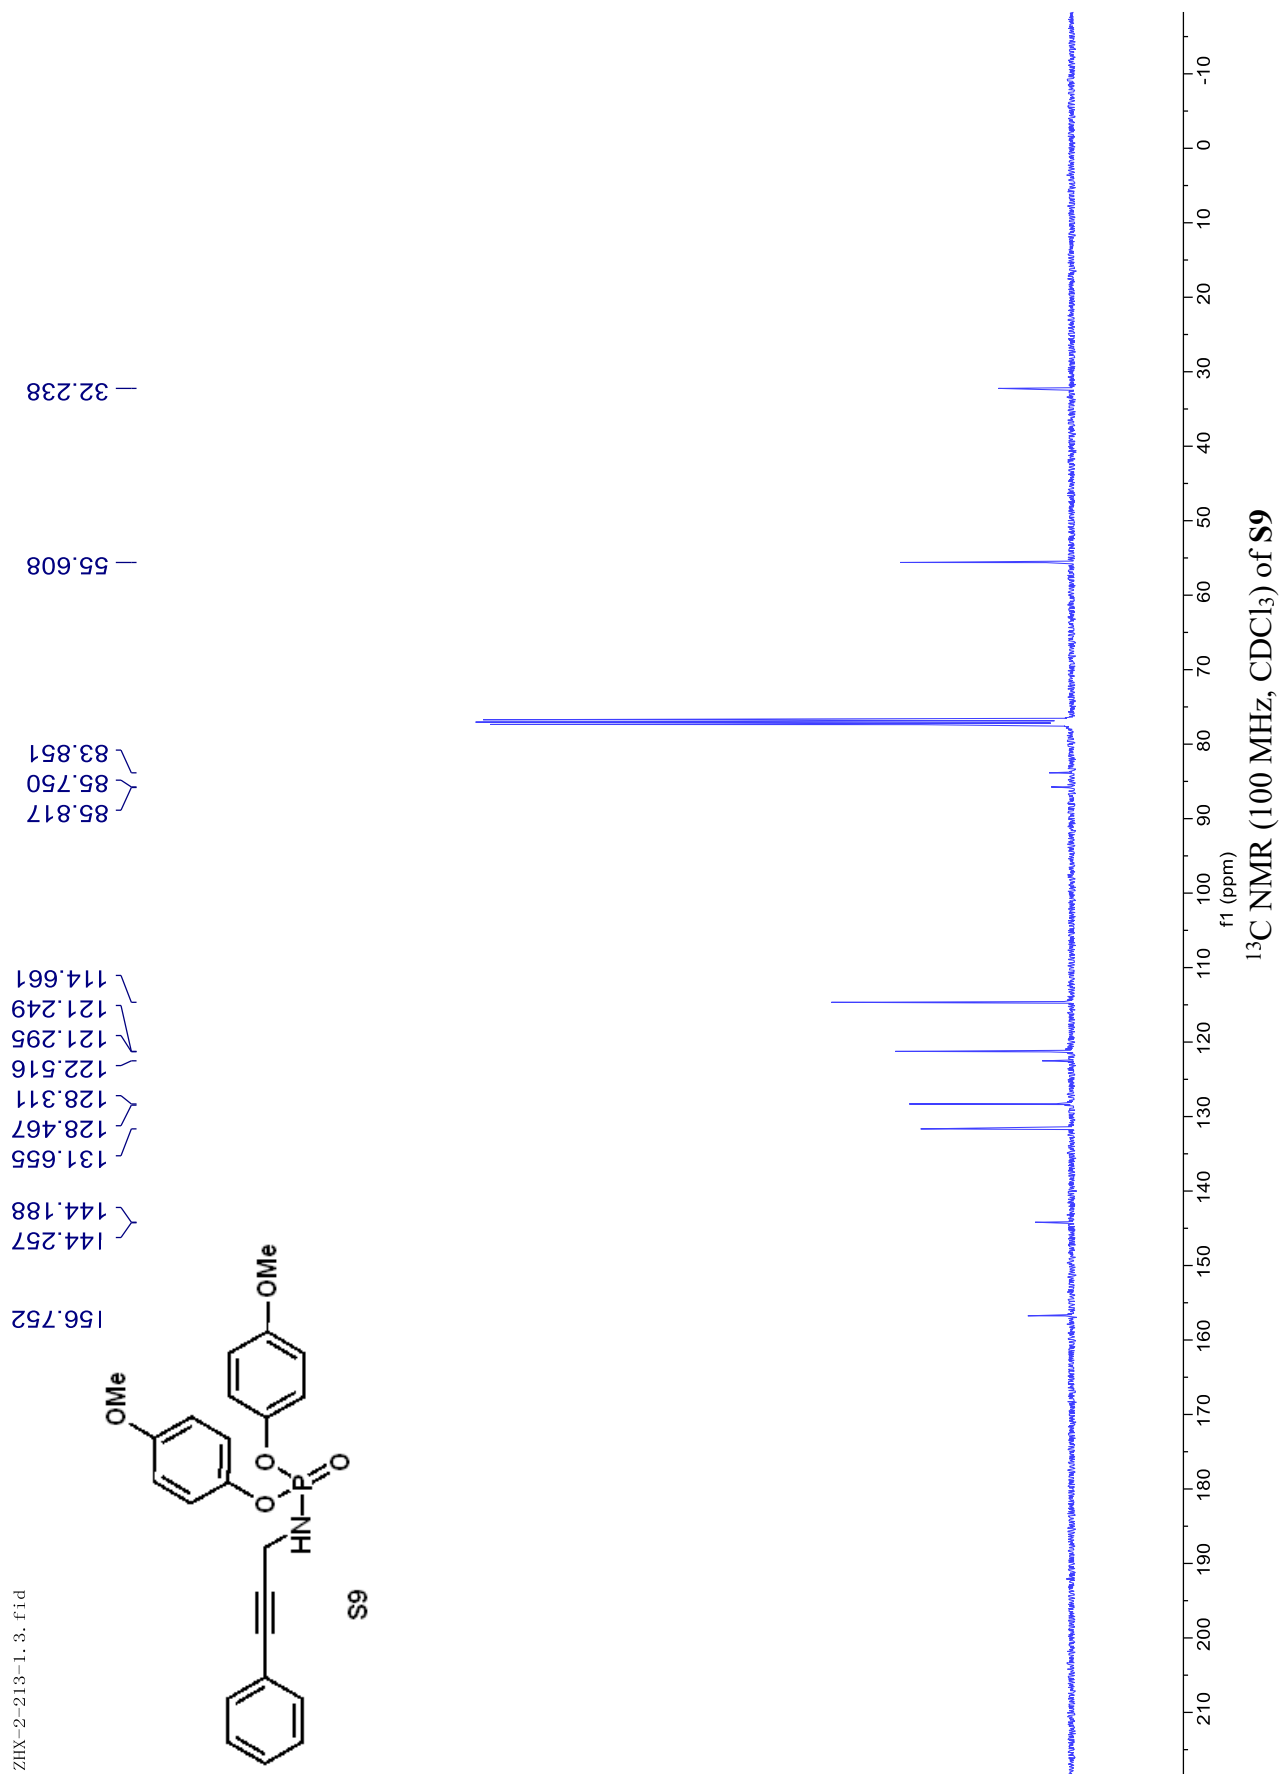

ZHX-2-213-1. 2. f1.d

-0.965

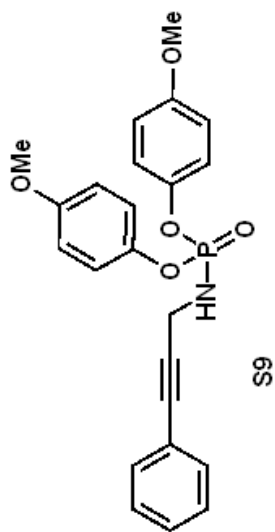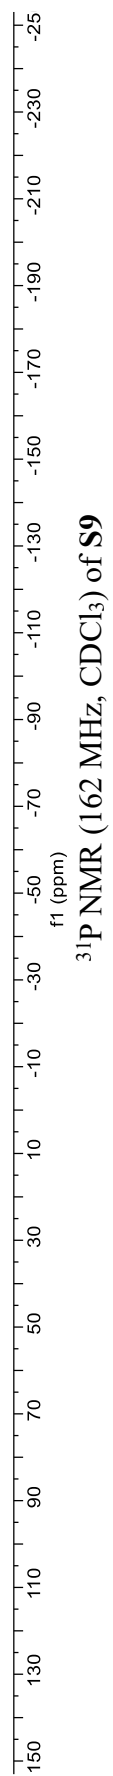



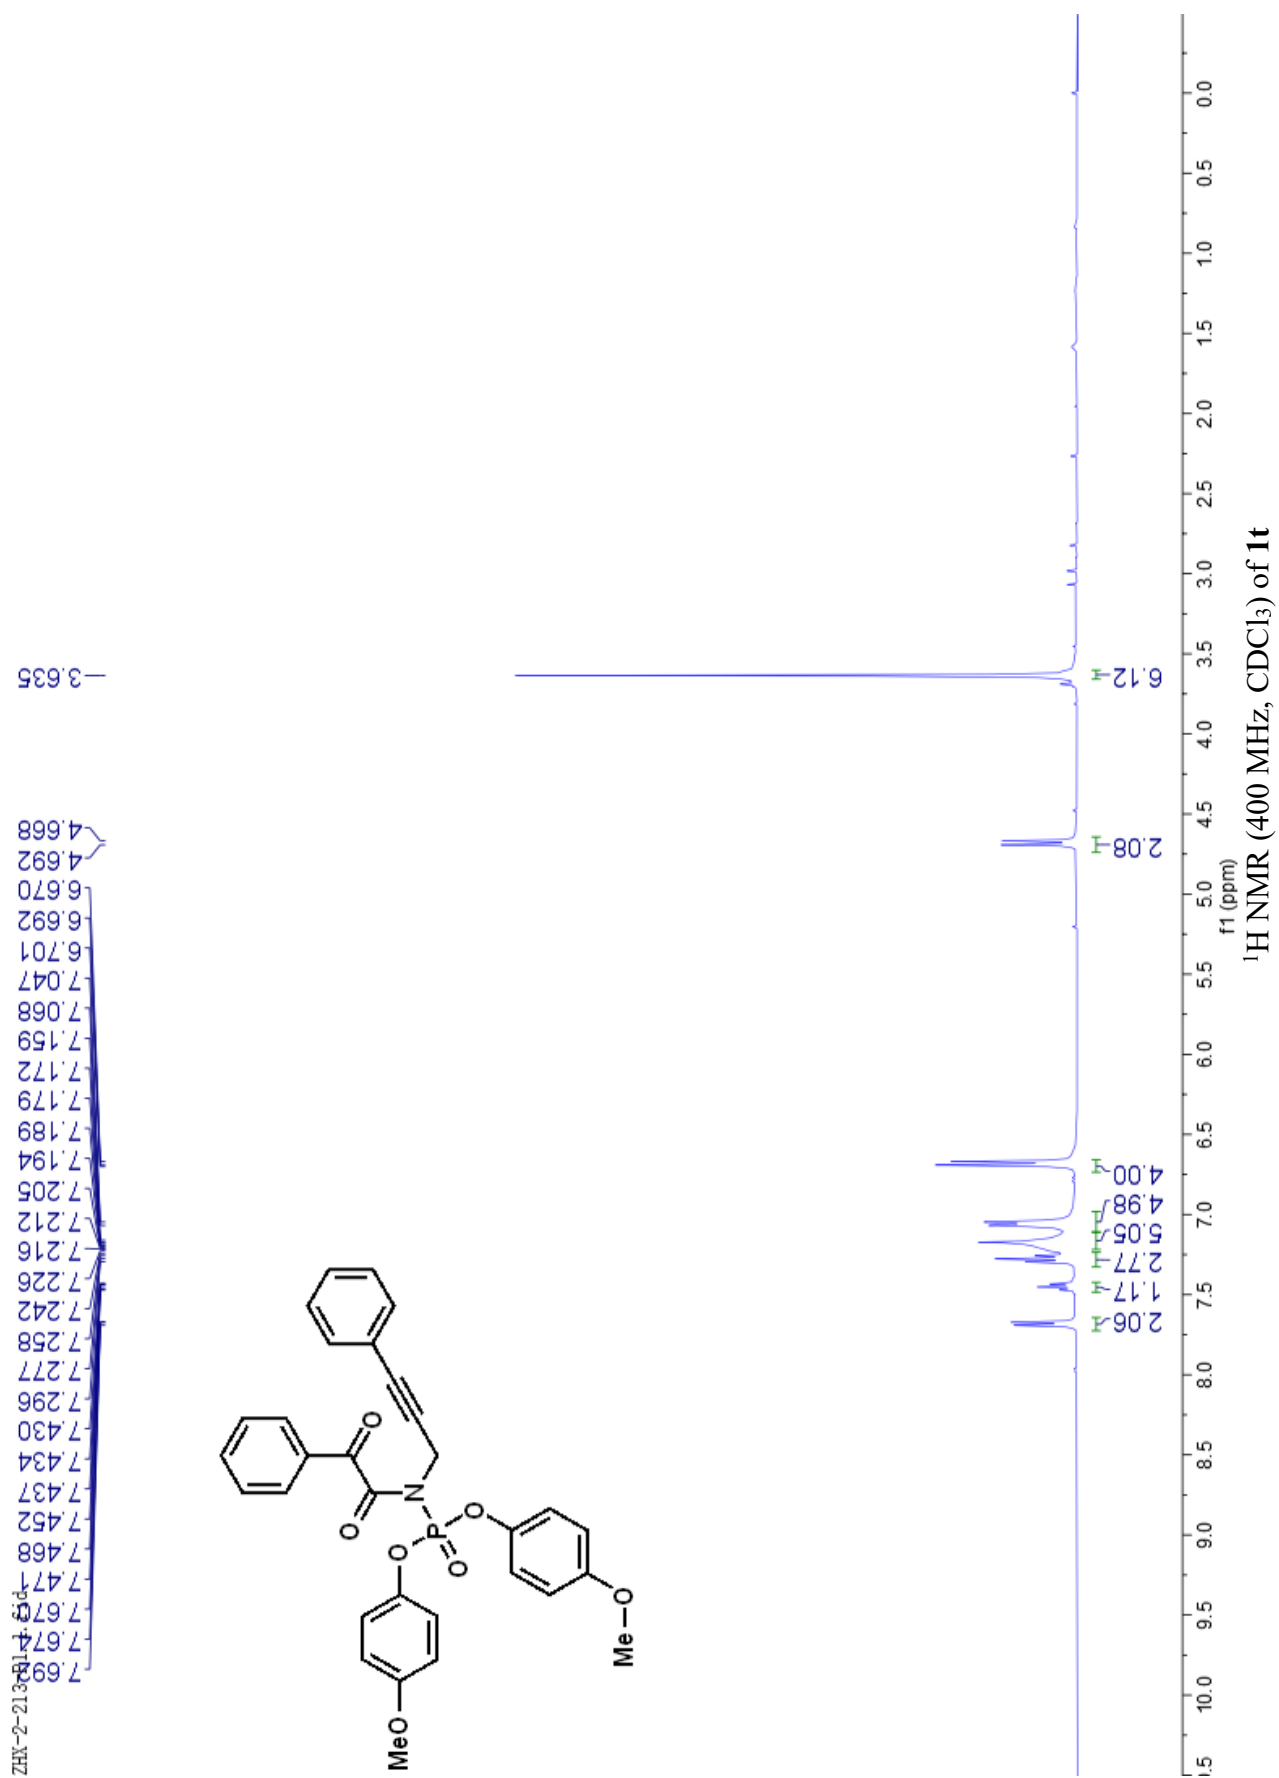

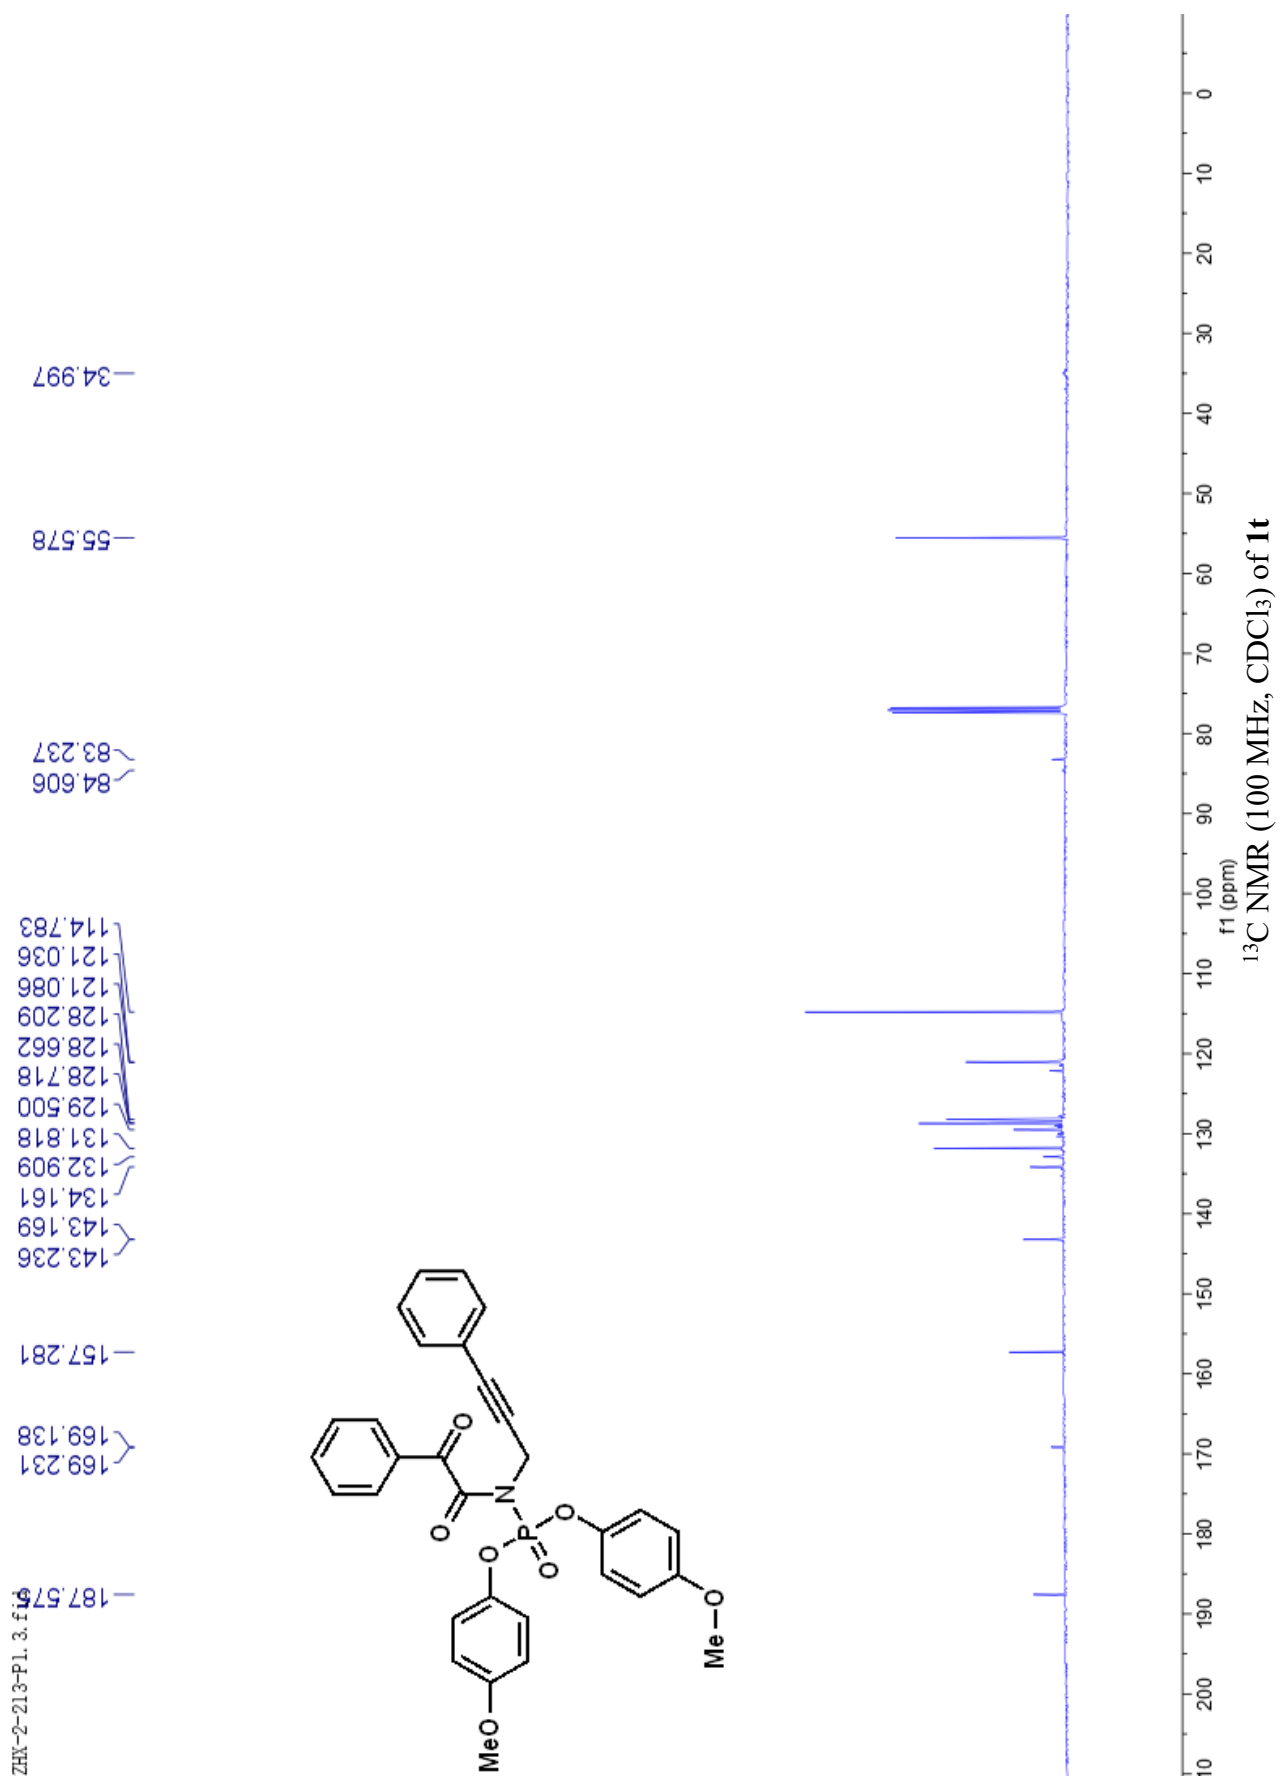

ZHX-2-213. 1. fid

—9.729

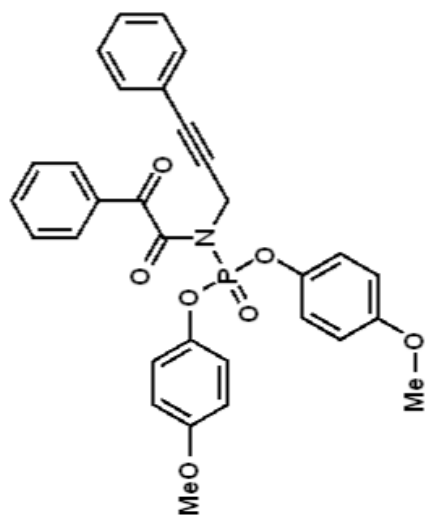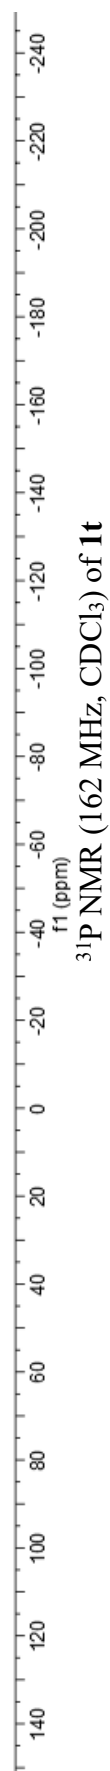

zhx-2-129-1.1.fid

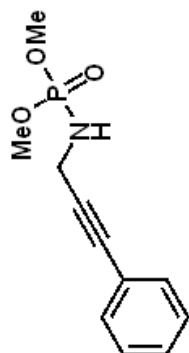

3.870  
3.853  
3.840  
3.824  
3.718  
3.690  
3.205  
3.179

7.339  
7.334  
7.327  
7.322  
7.315  
7.248  
7.241  
7.237  
7.229  
7.223

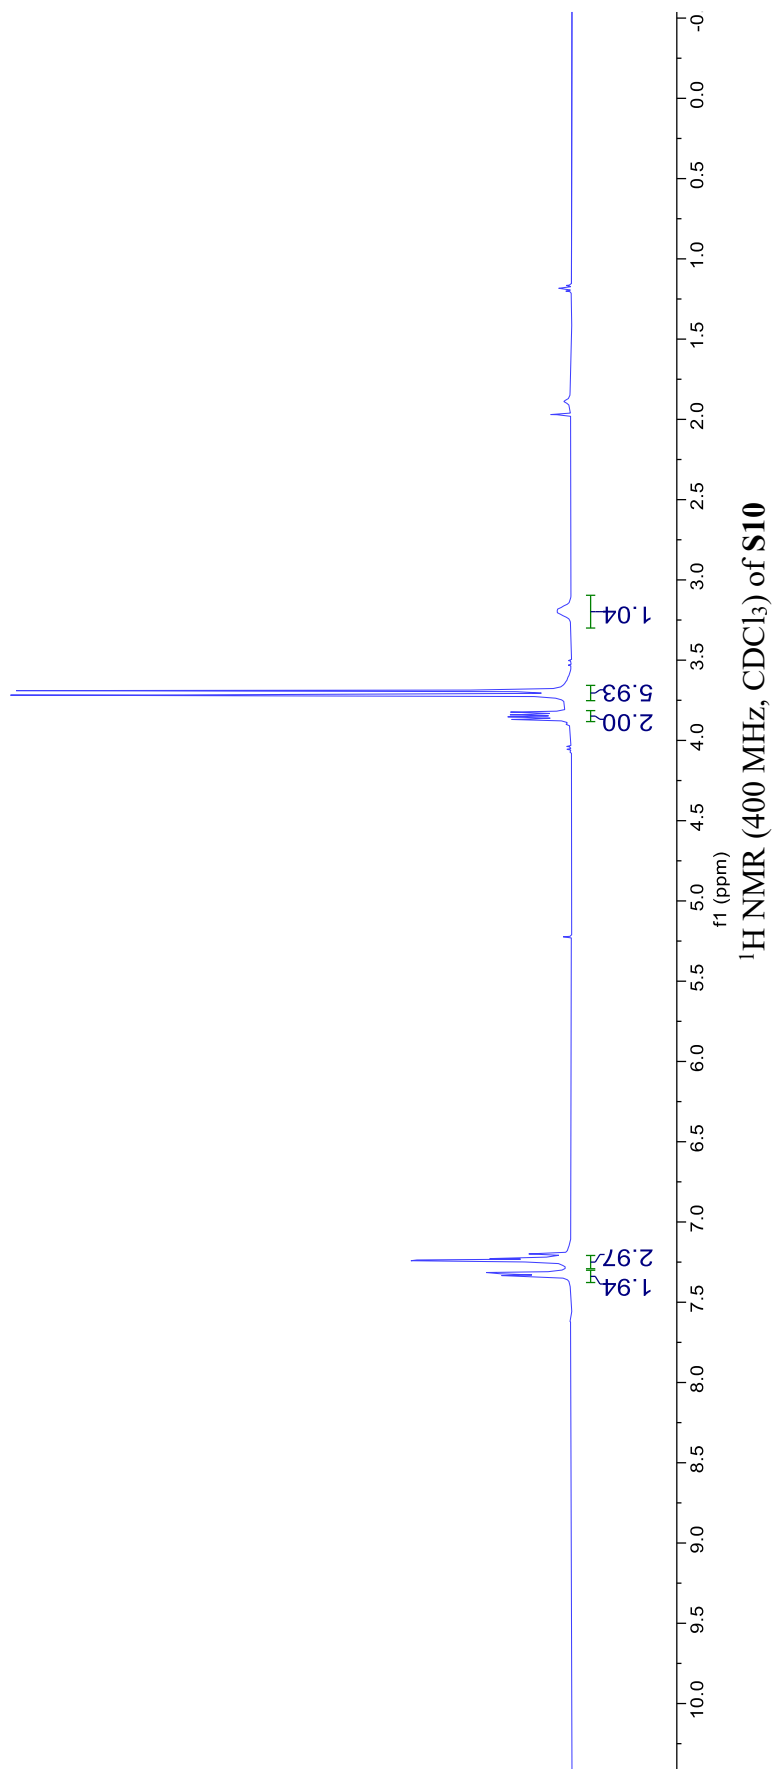

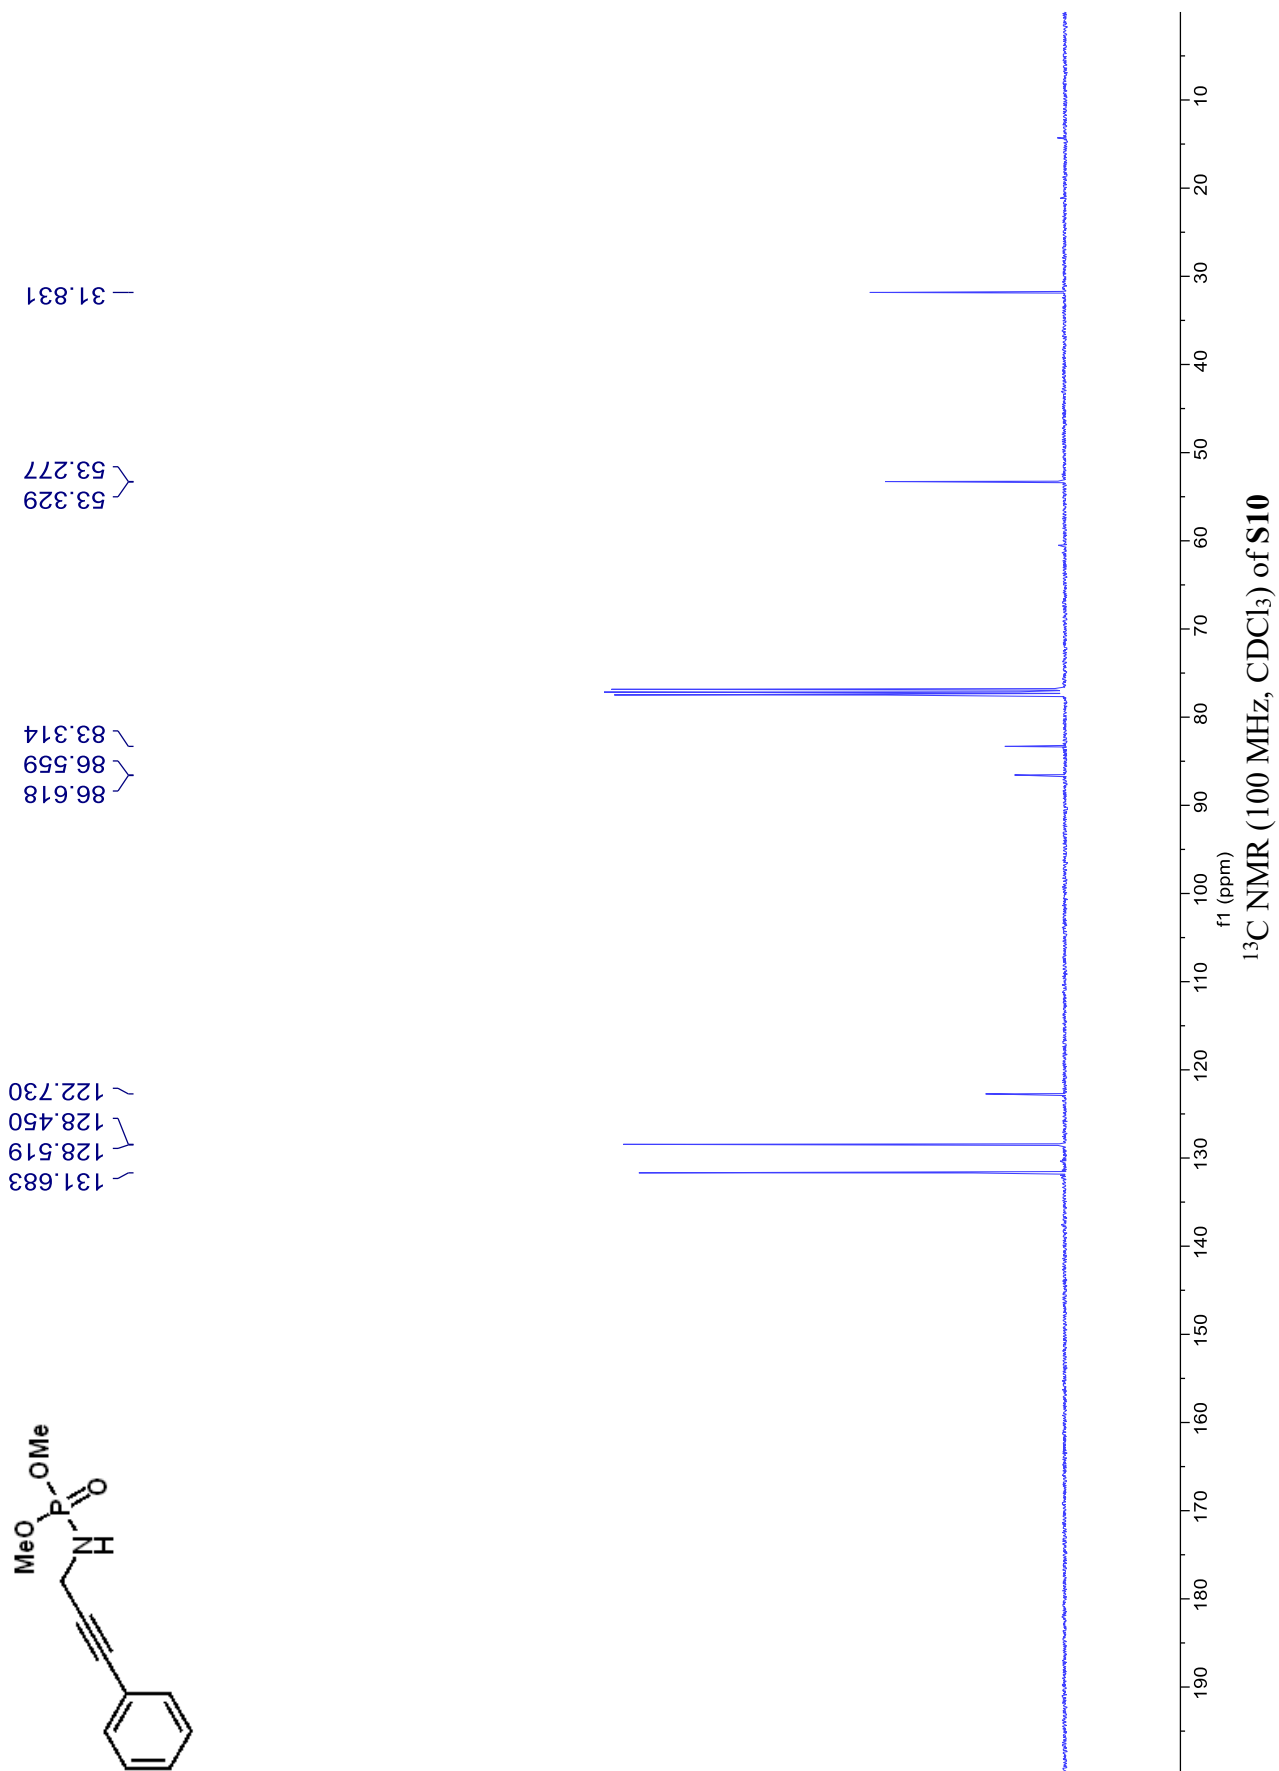

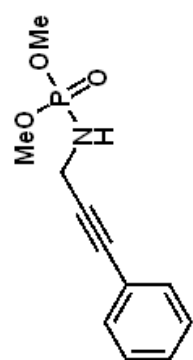

— 10.598

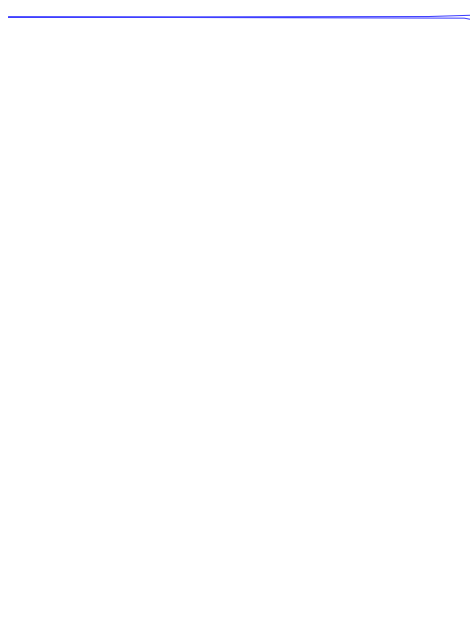

150 130 110 90 70 50 30 10 -10 -30 -50 -70 -90 -110 -130 -150 -170 -190 -210 -230 -25  
f1 (ppm)

<sup>31</sup>P NMR (162 MHz, CDCl<sub>3</sub>) of **S10**

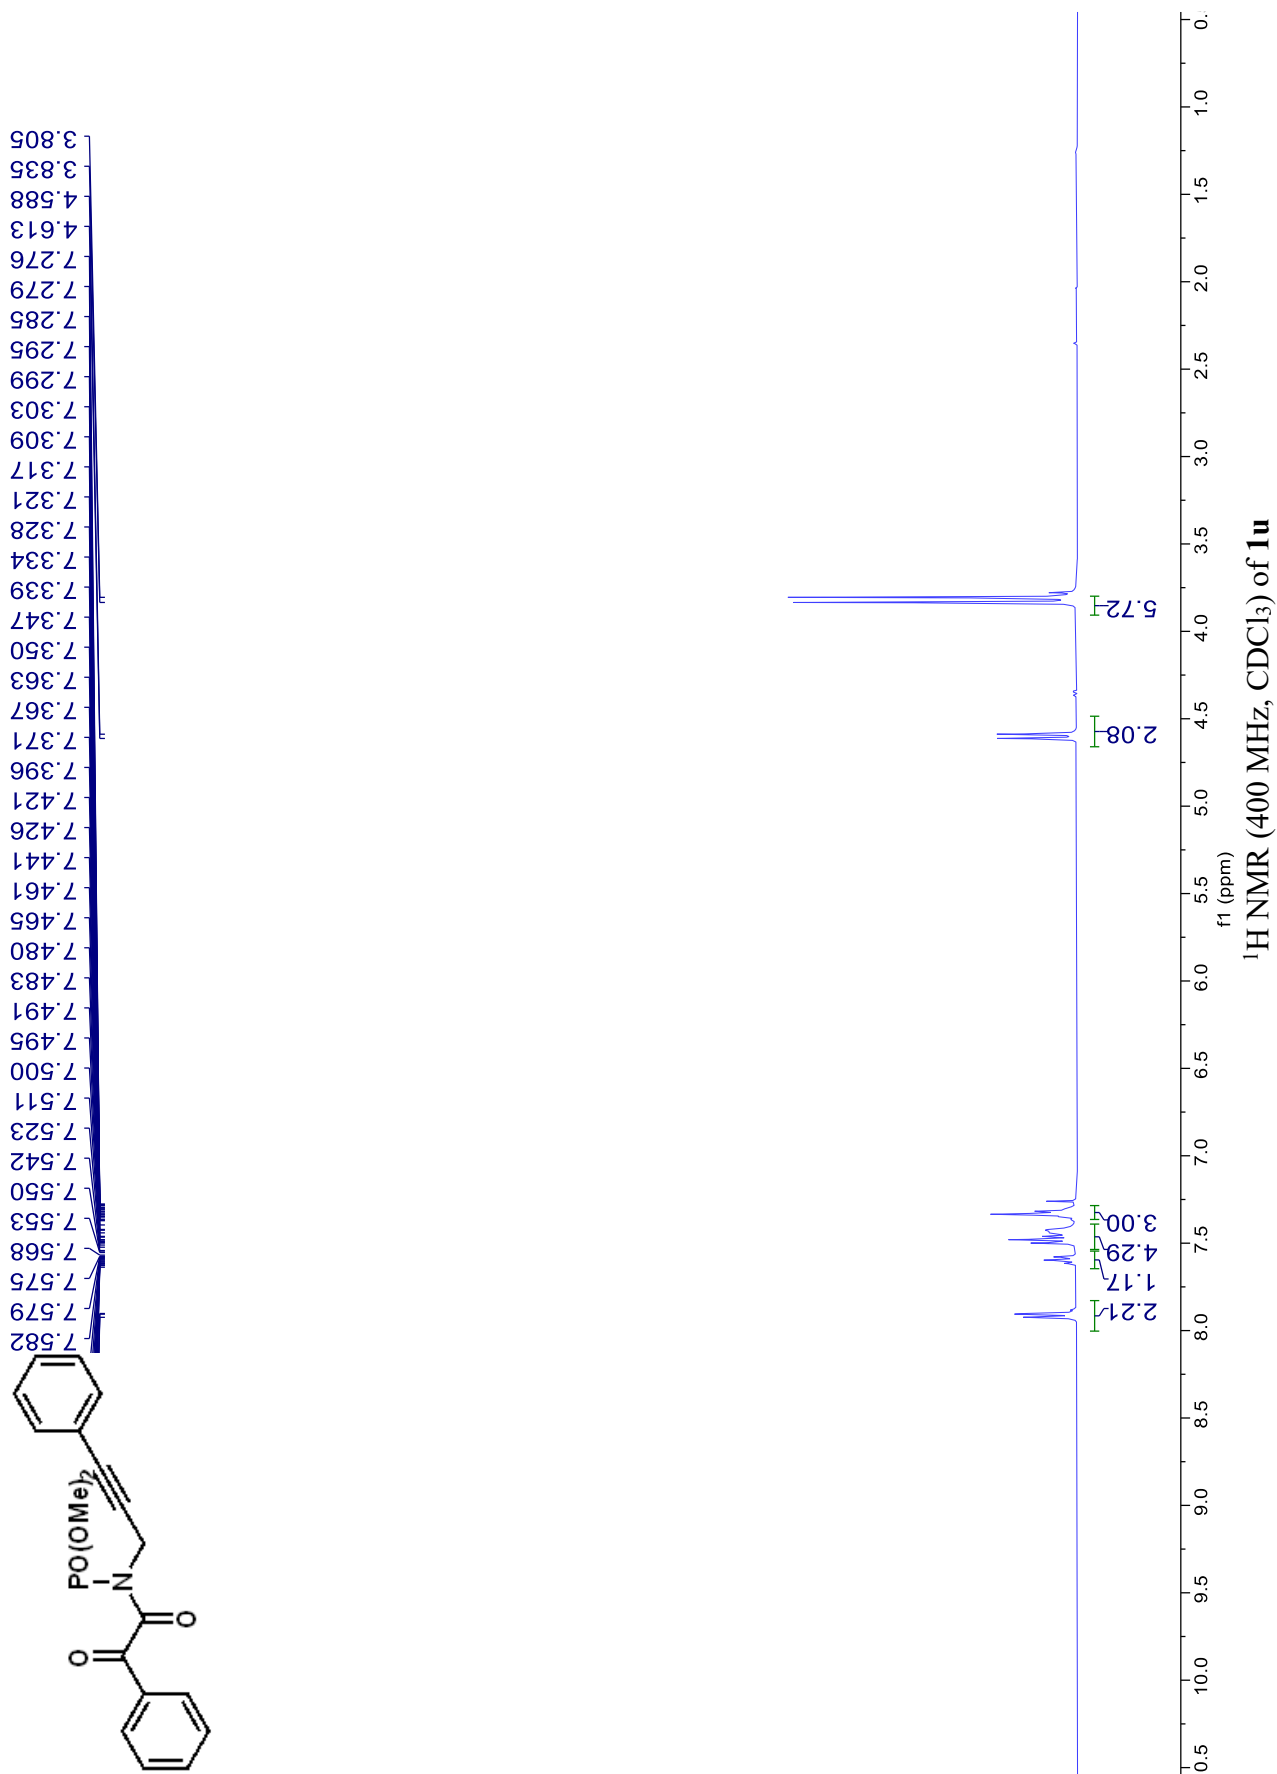

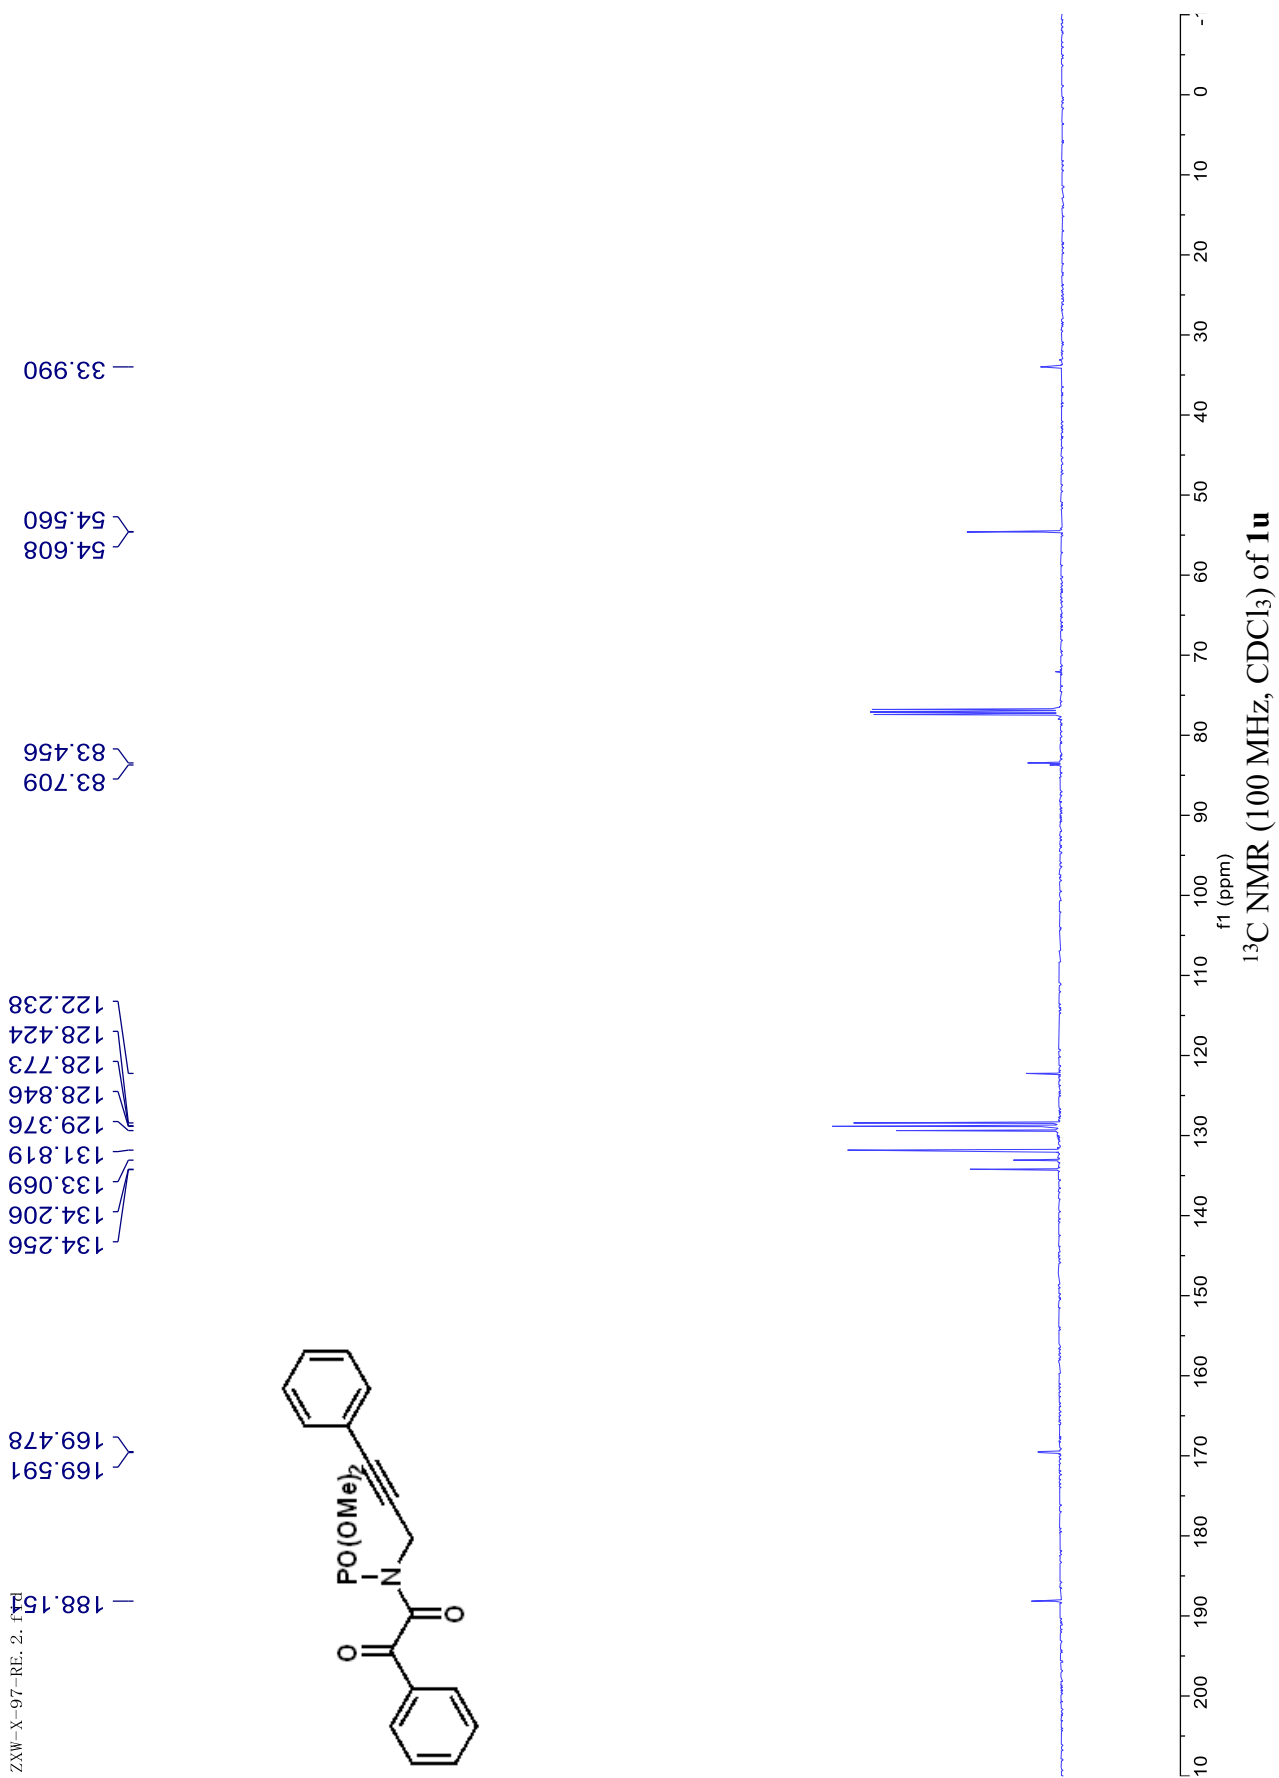



- 1.977

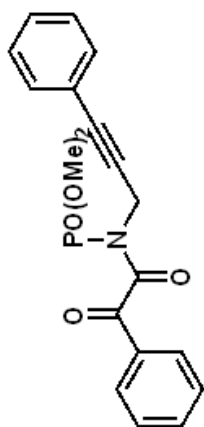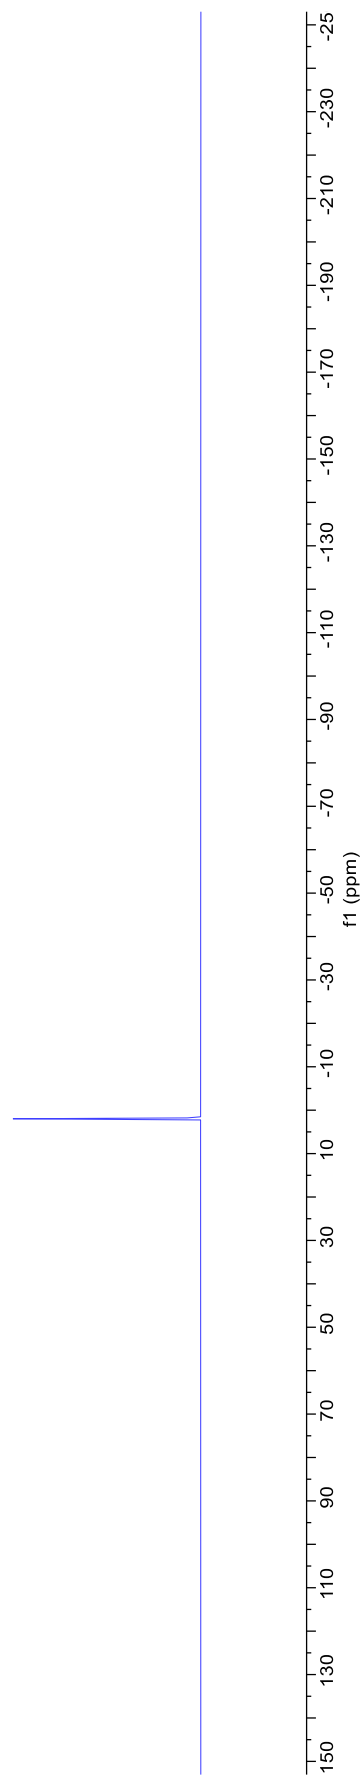

<sup>31</sup>P NMR (162 MHz, CDCl<sub>3</sub>) of **1u**

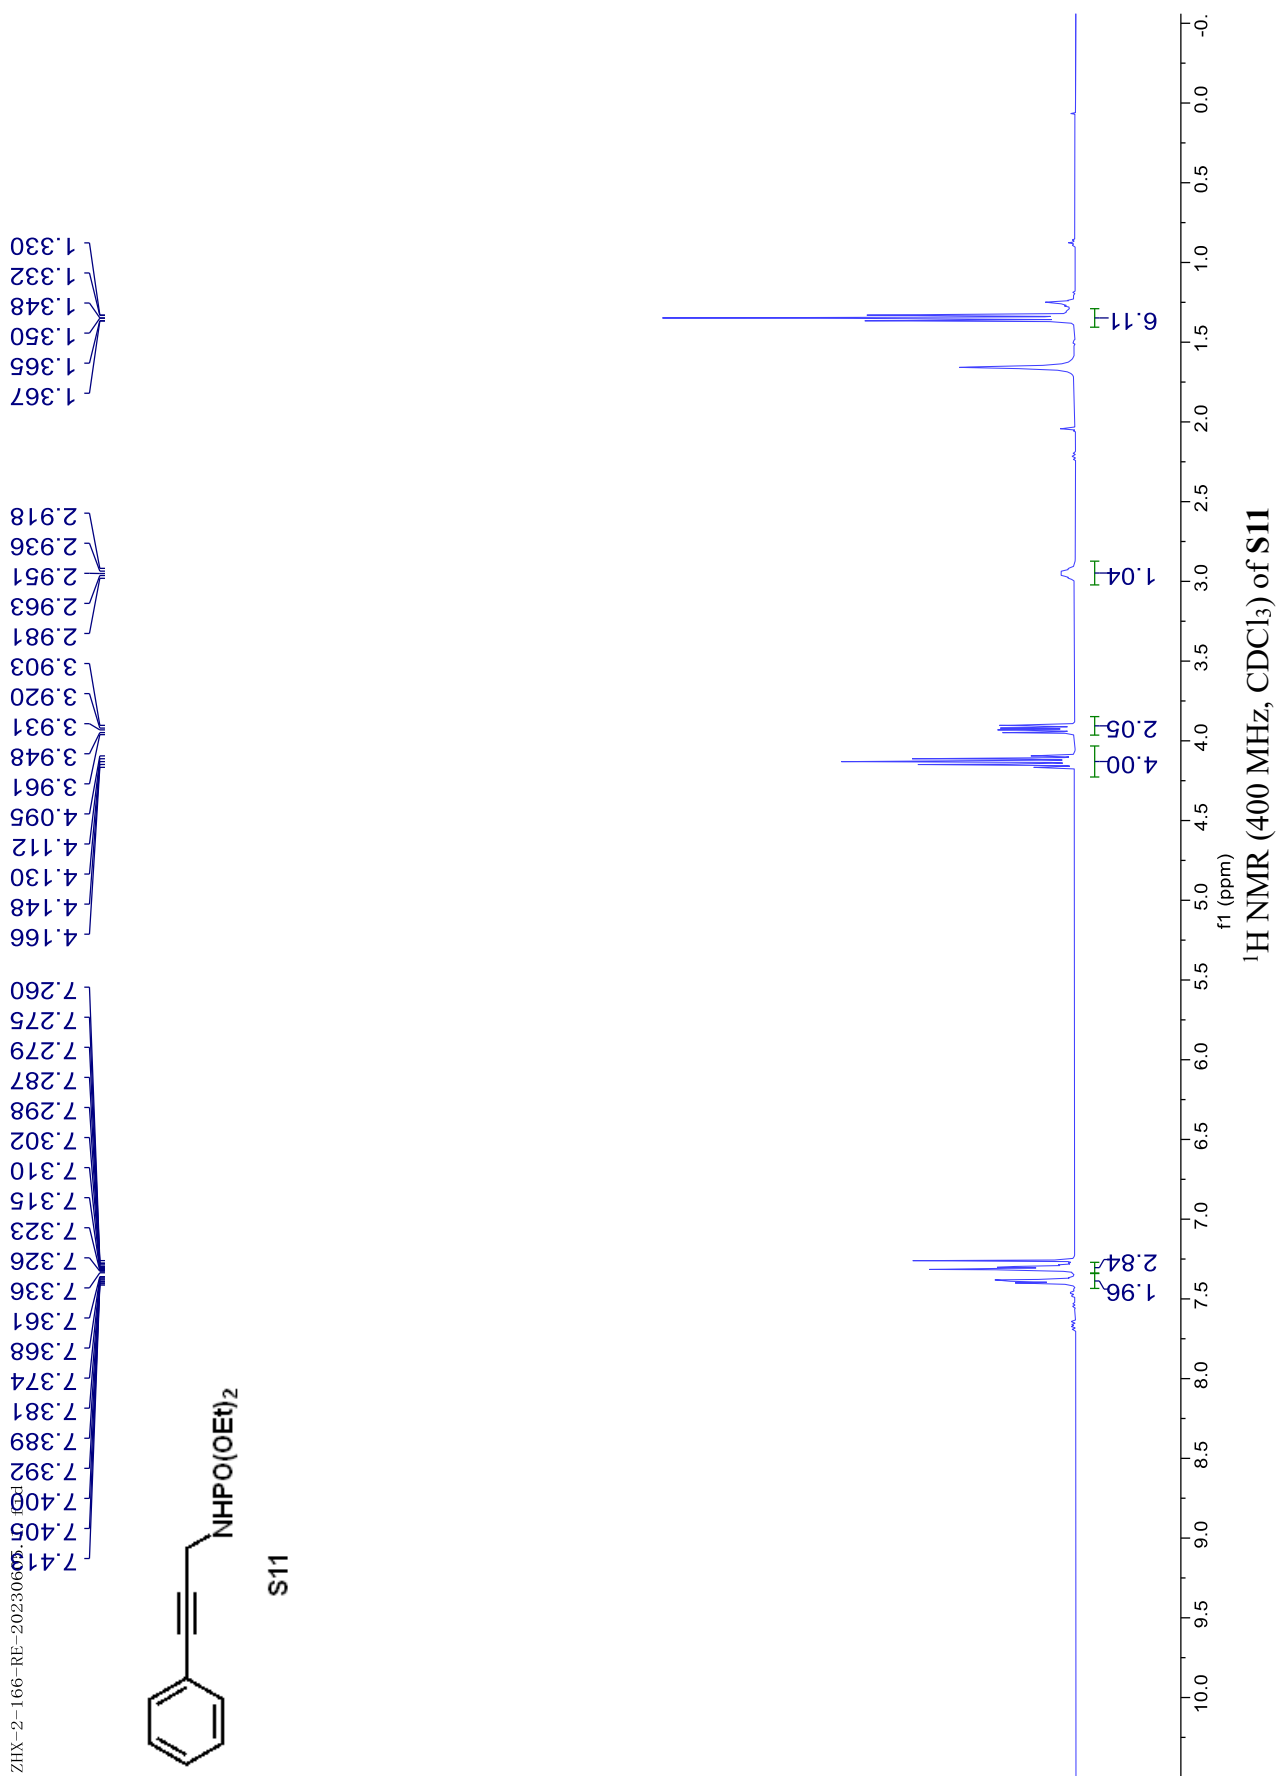

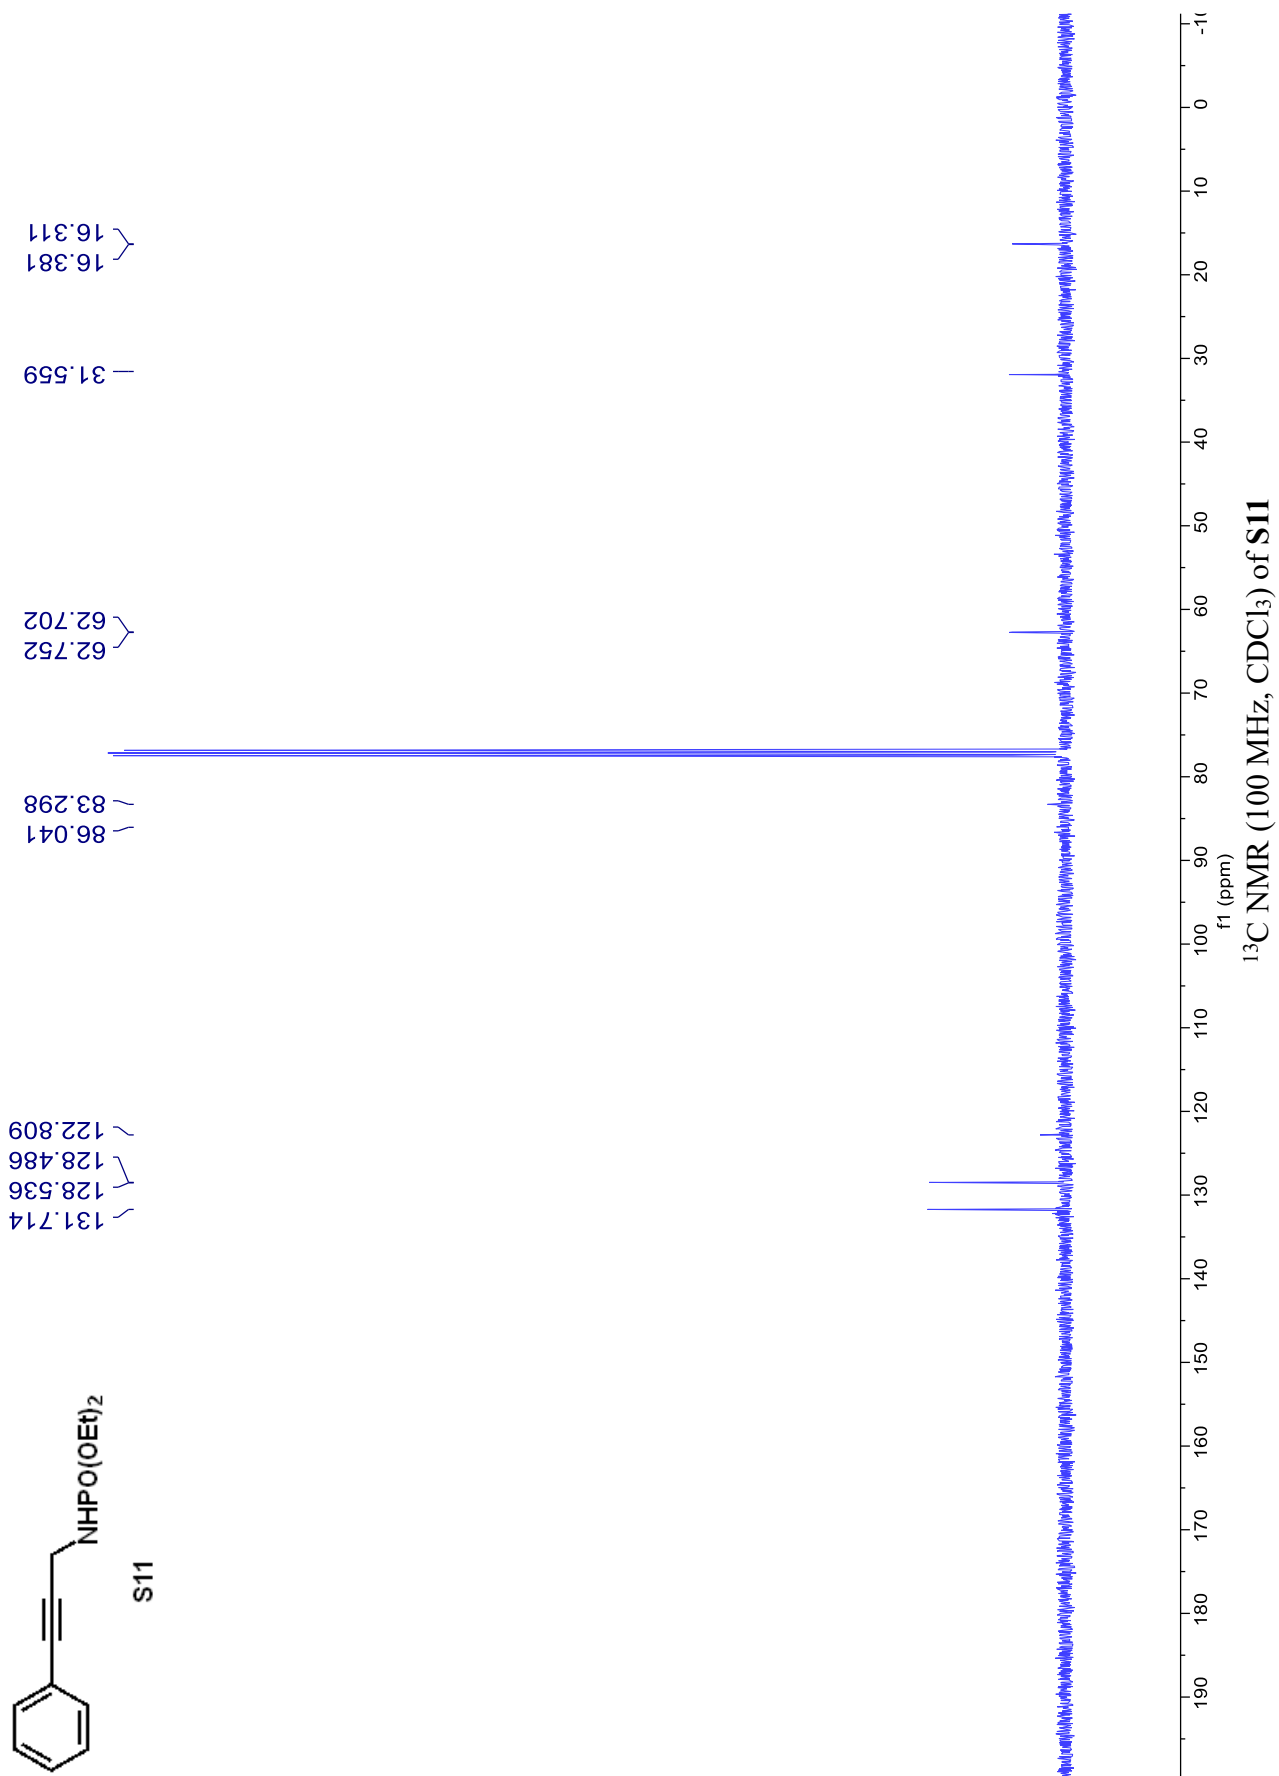

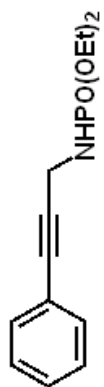

S11

— 7.754

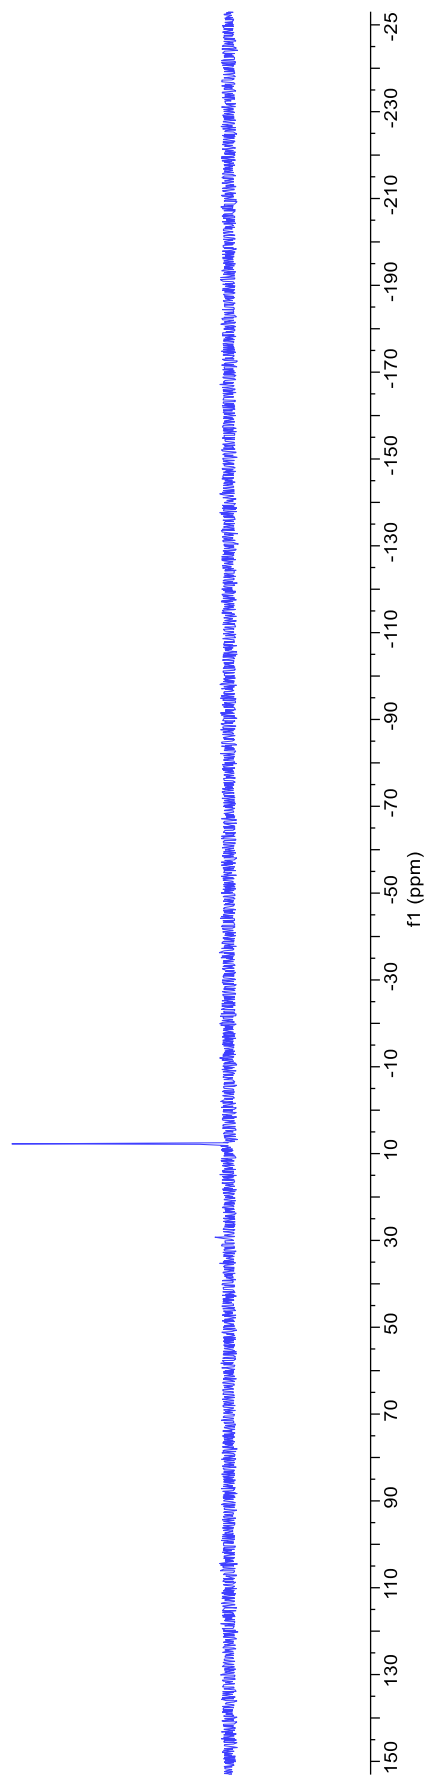

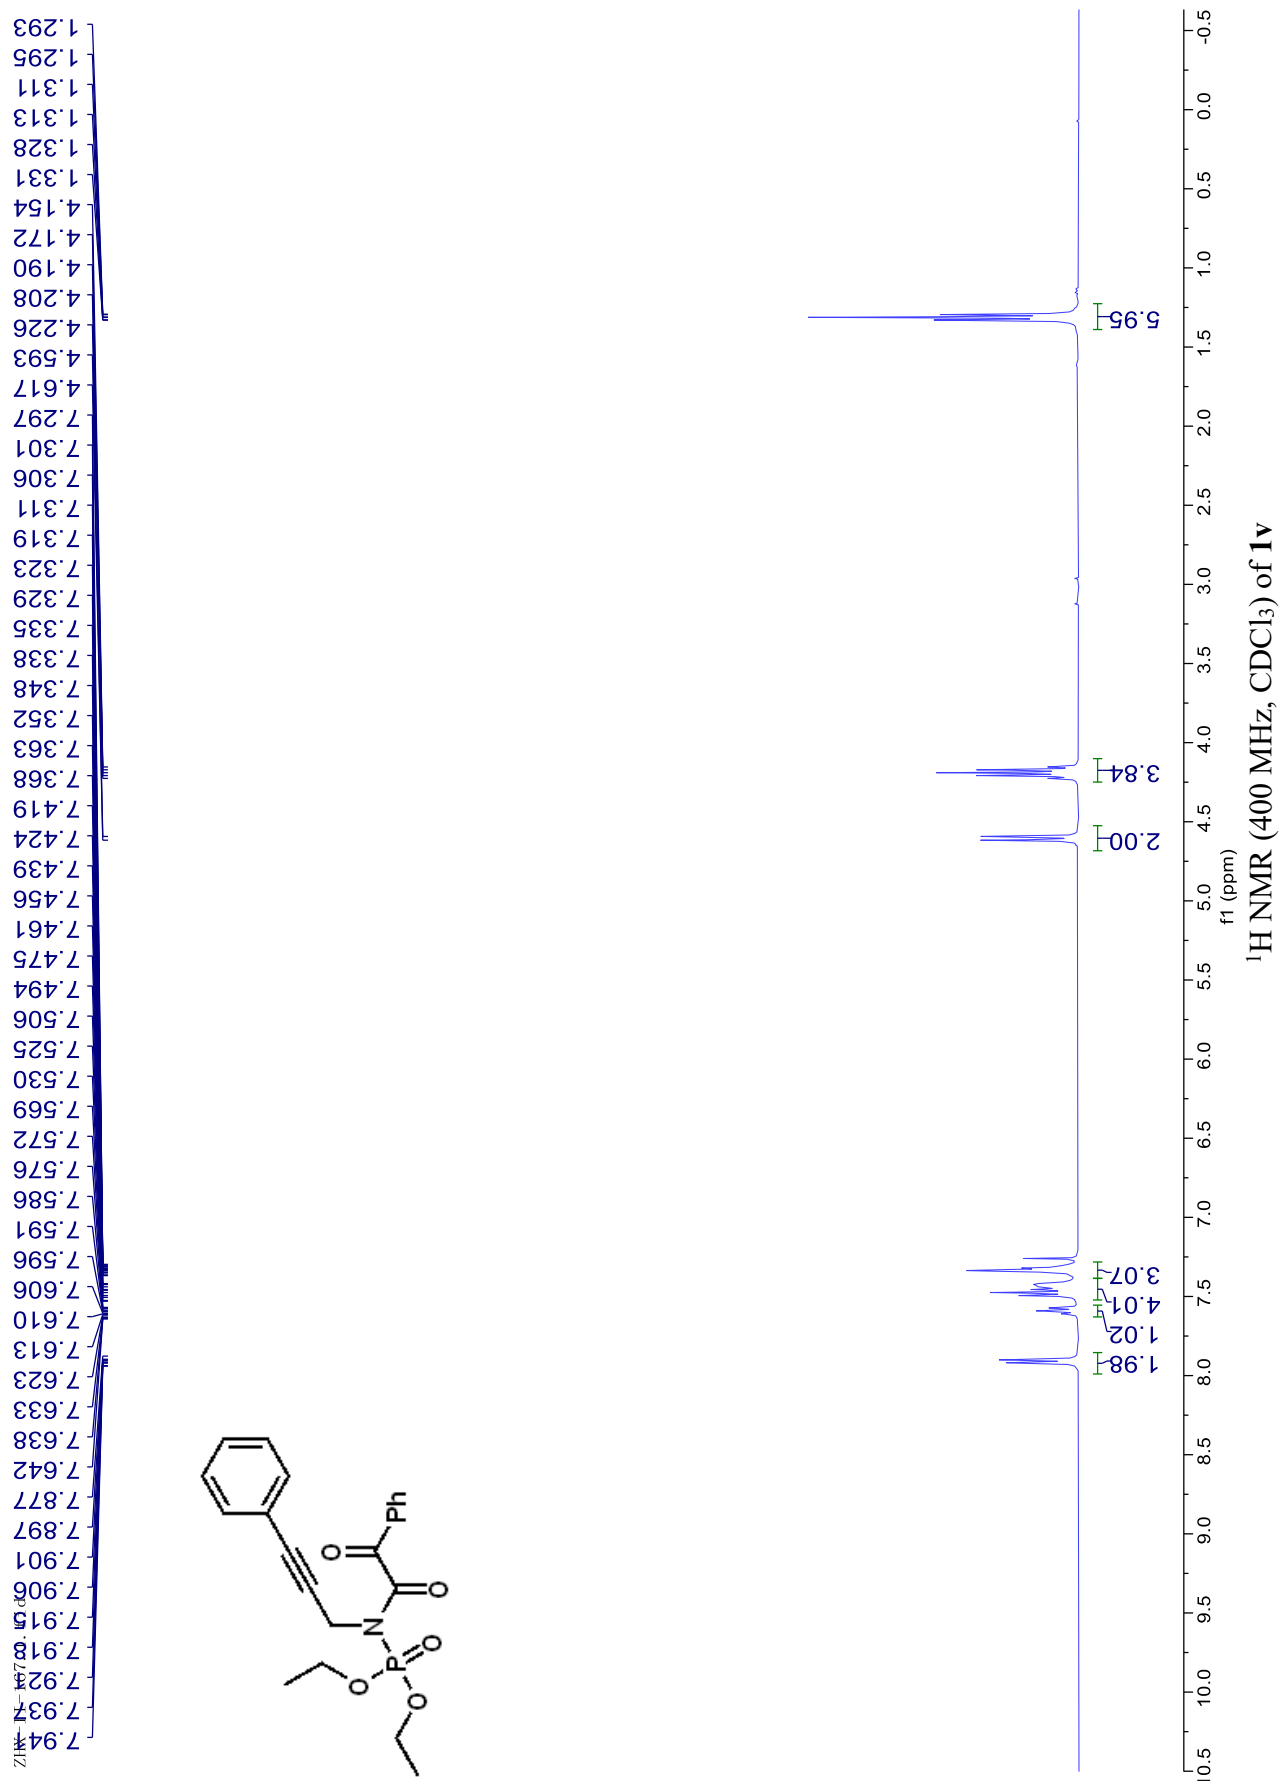

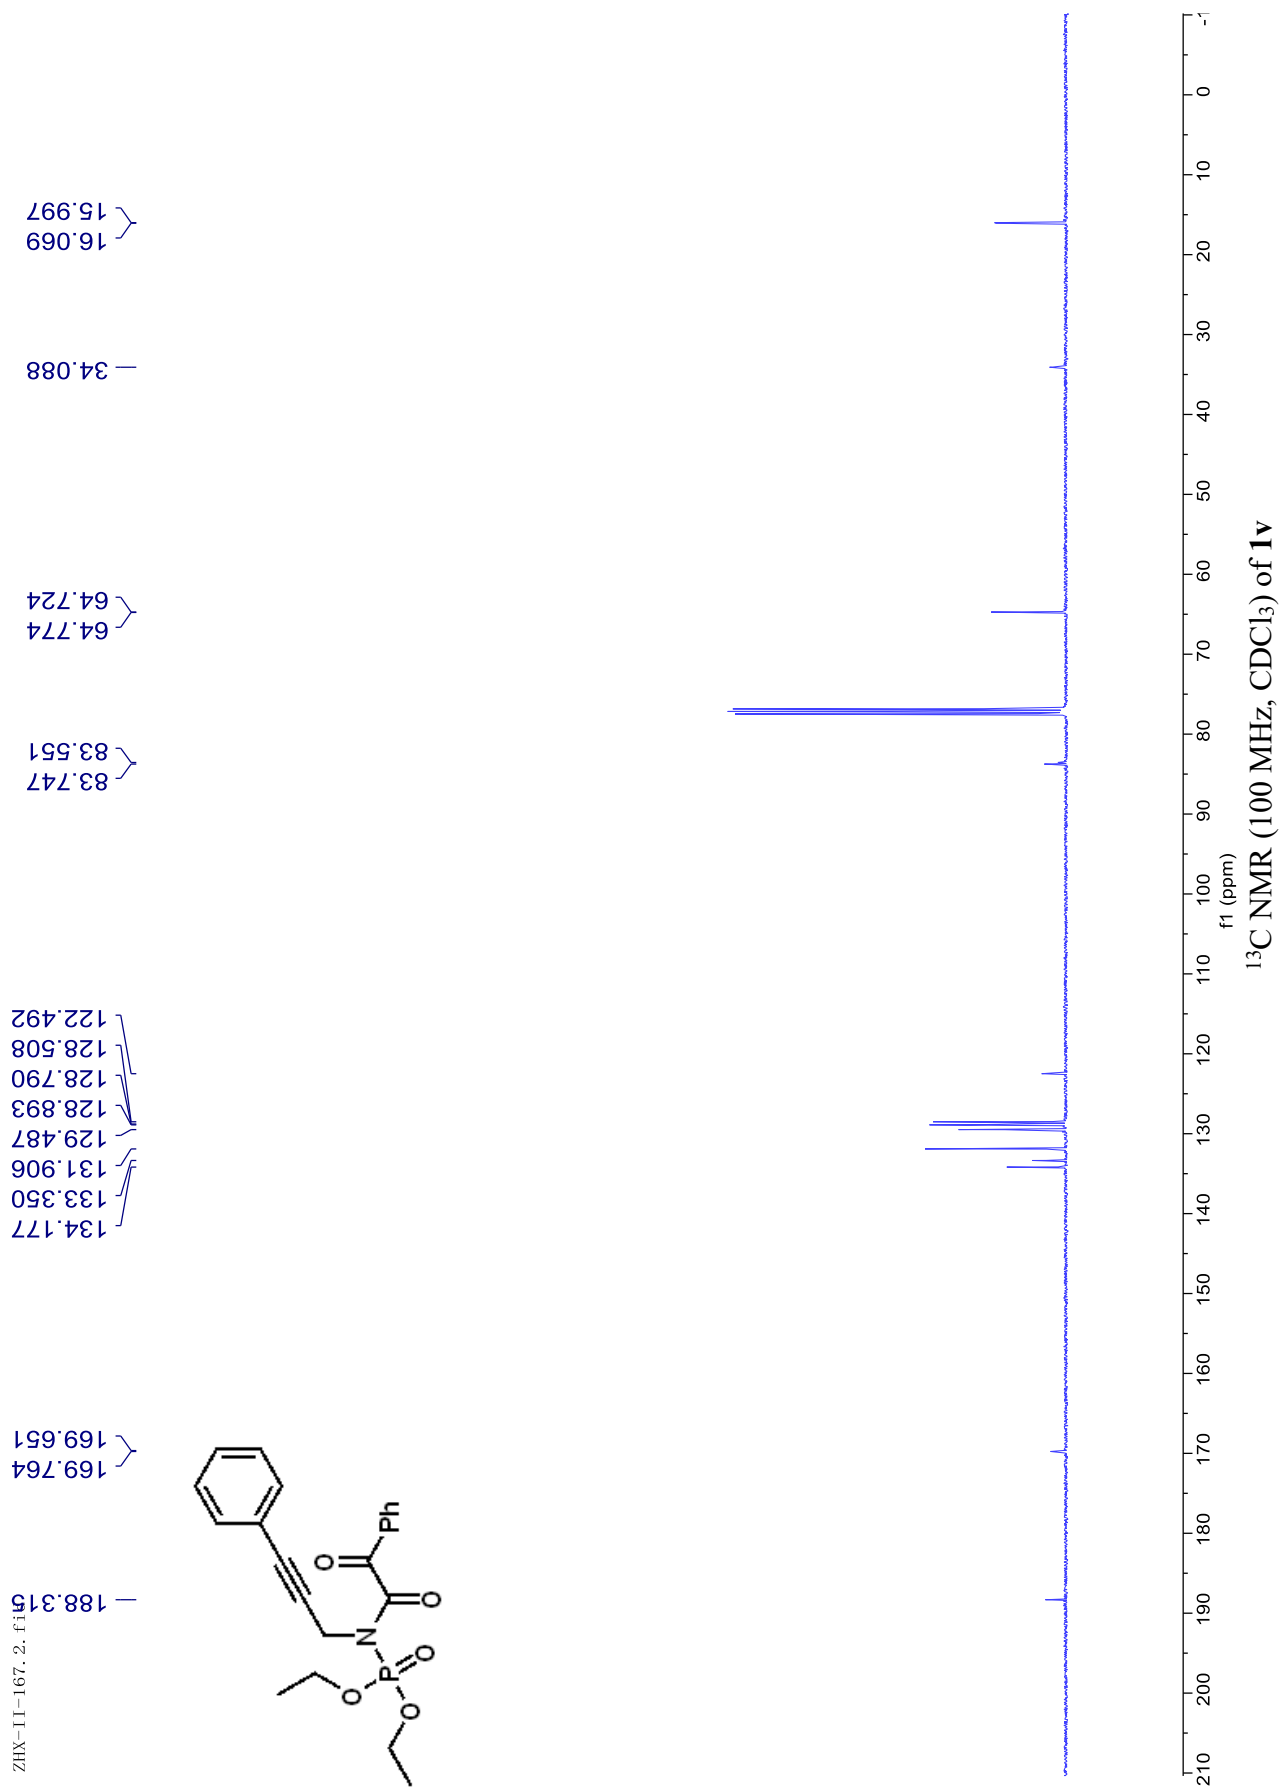

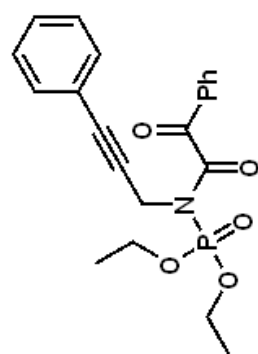

— -1.102

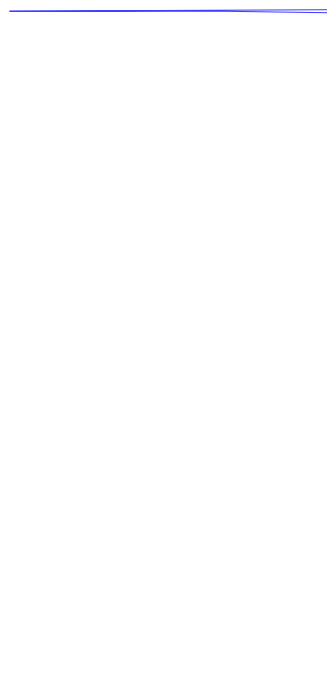

150 130 110 90 70 50 30 10 -10 -30 -50 -70 -90 -110 -130 -150 -170 -190 -210 -230 -25

<sup>31</sup>P NMR (162 MHz, CDCl<sub>3</sub>) of **1v**

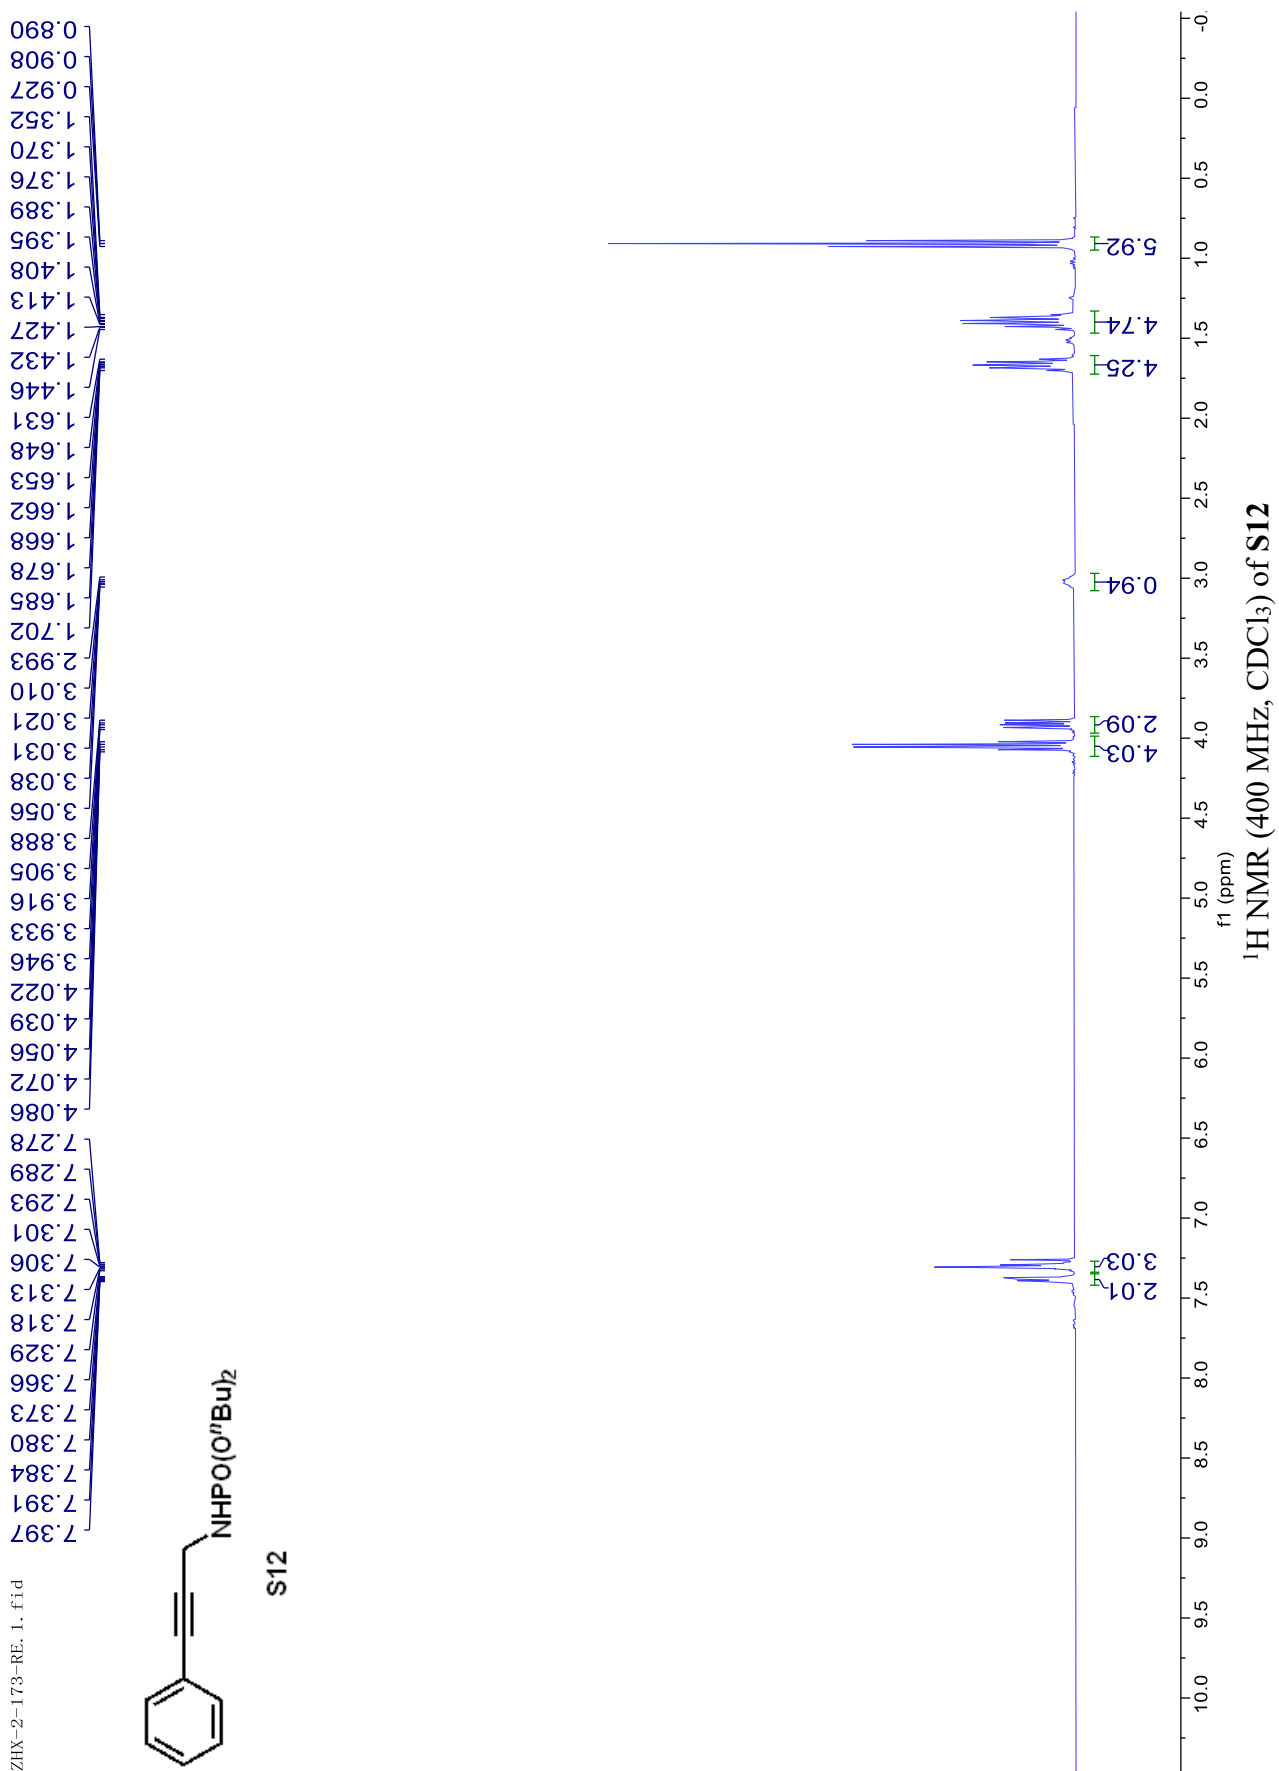



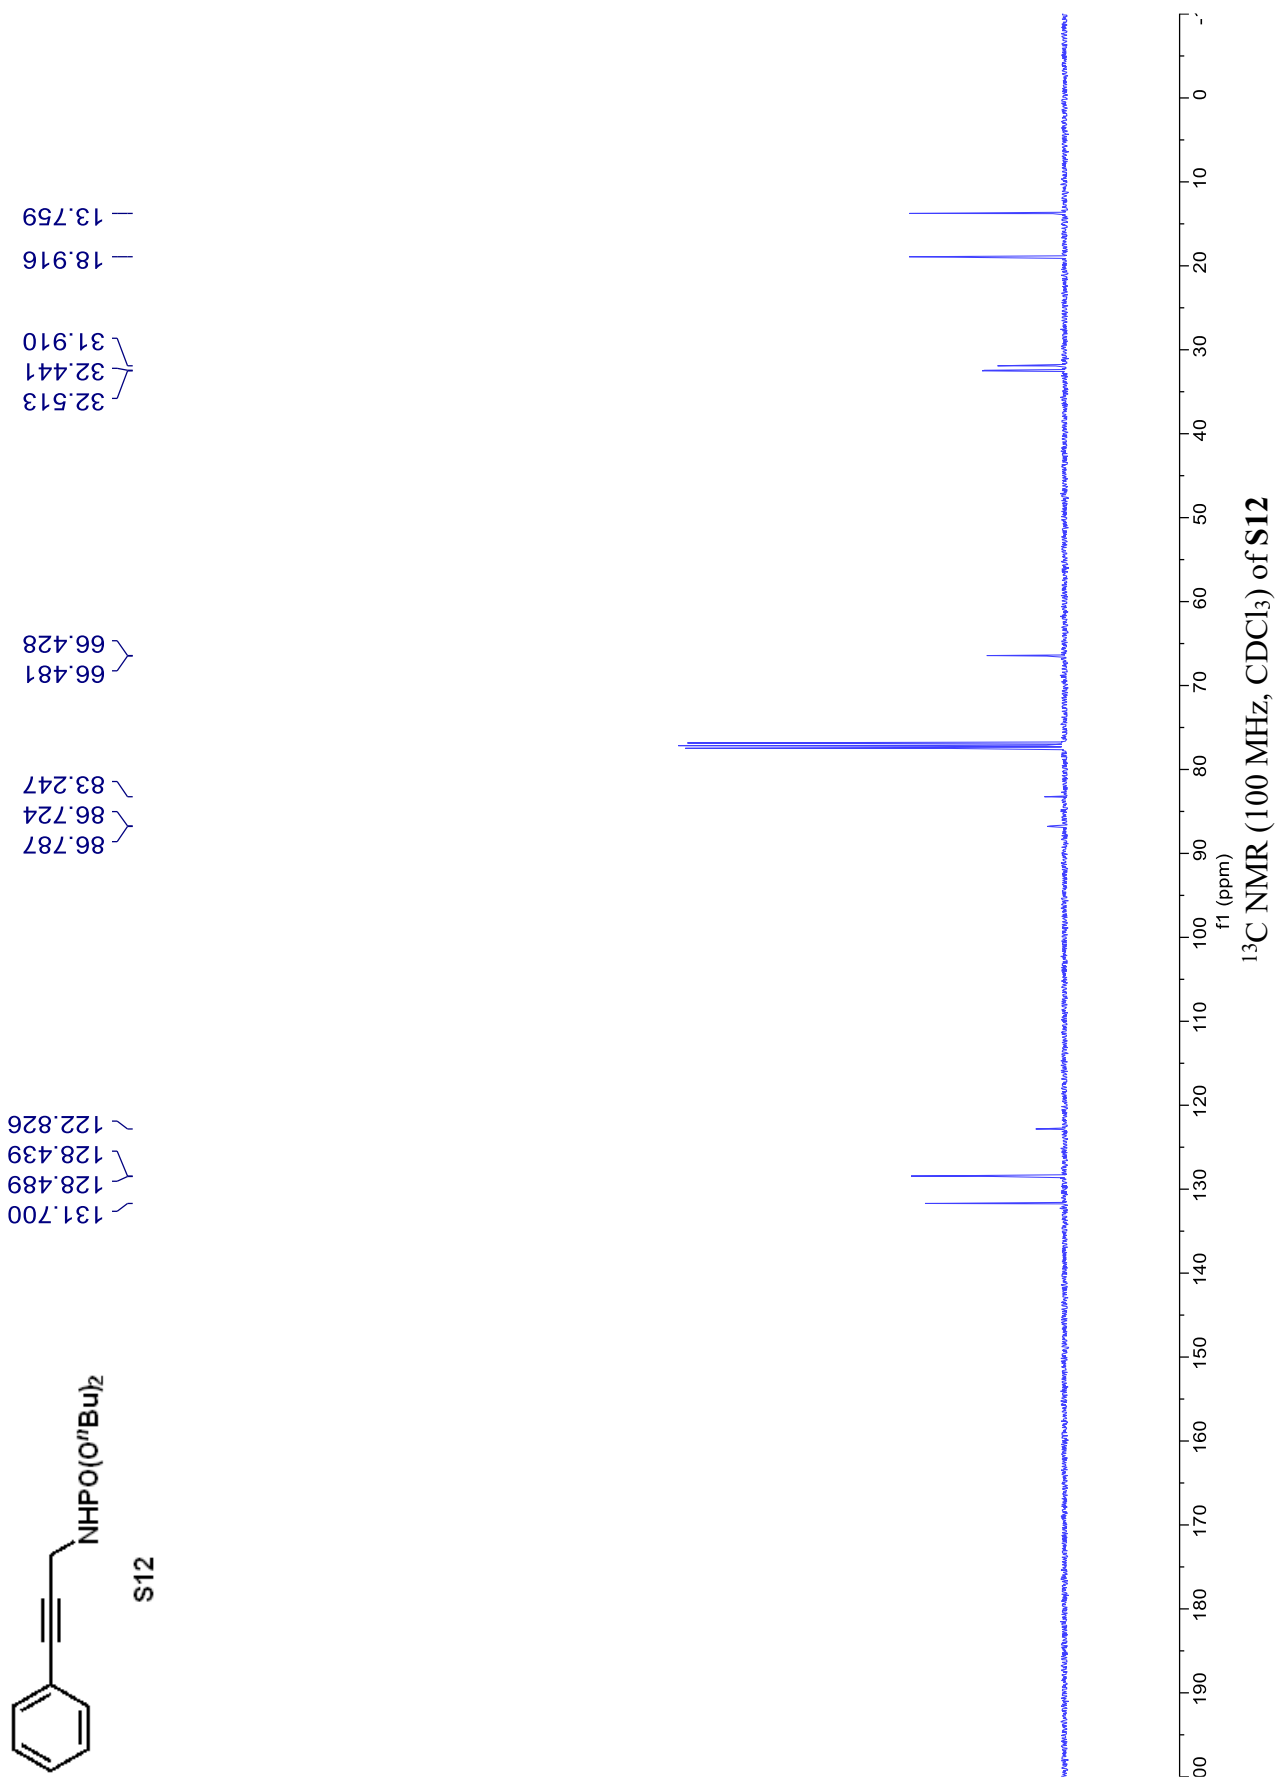

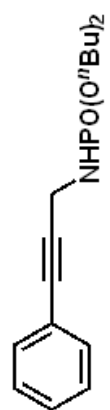

S12

— 7.976

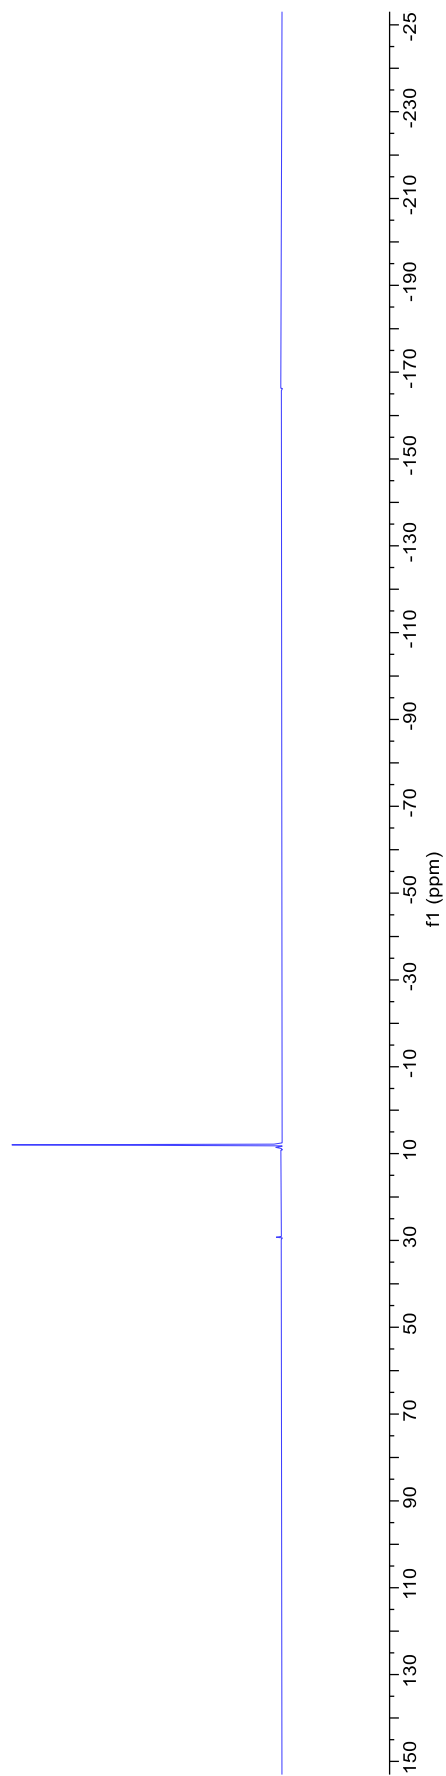

<sup>31</sup>P NMR (162 MHz, CDCl<sub>3</sub>) of S12

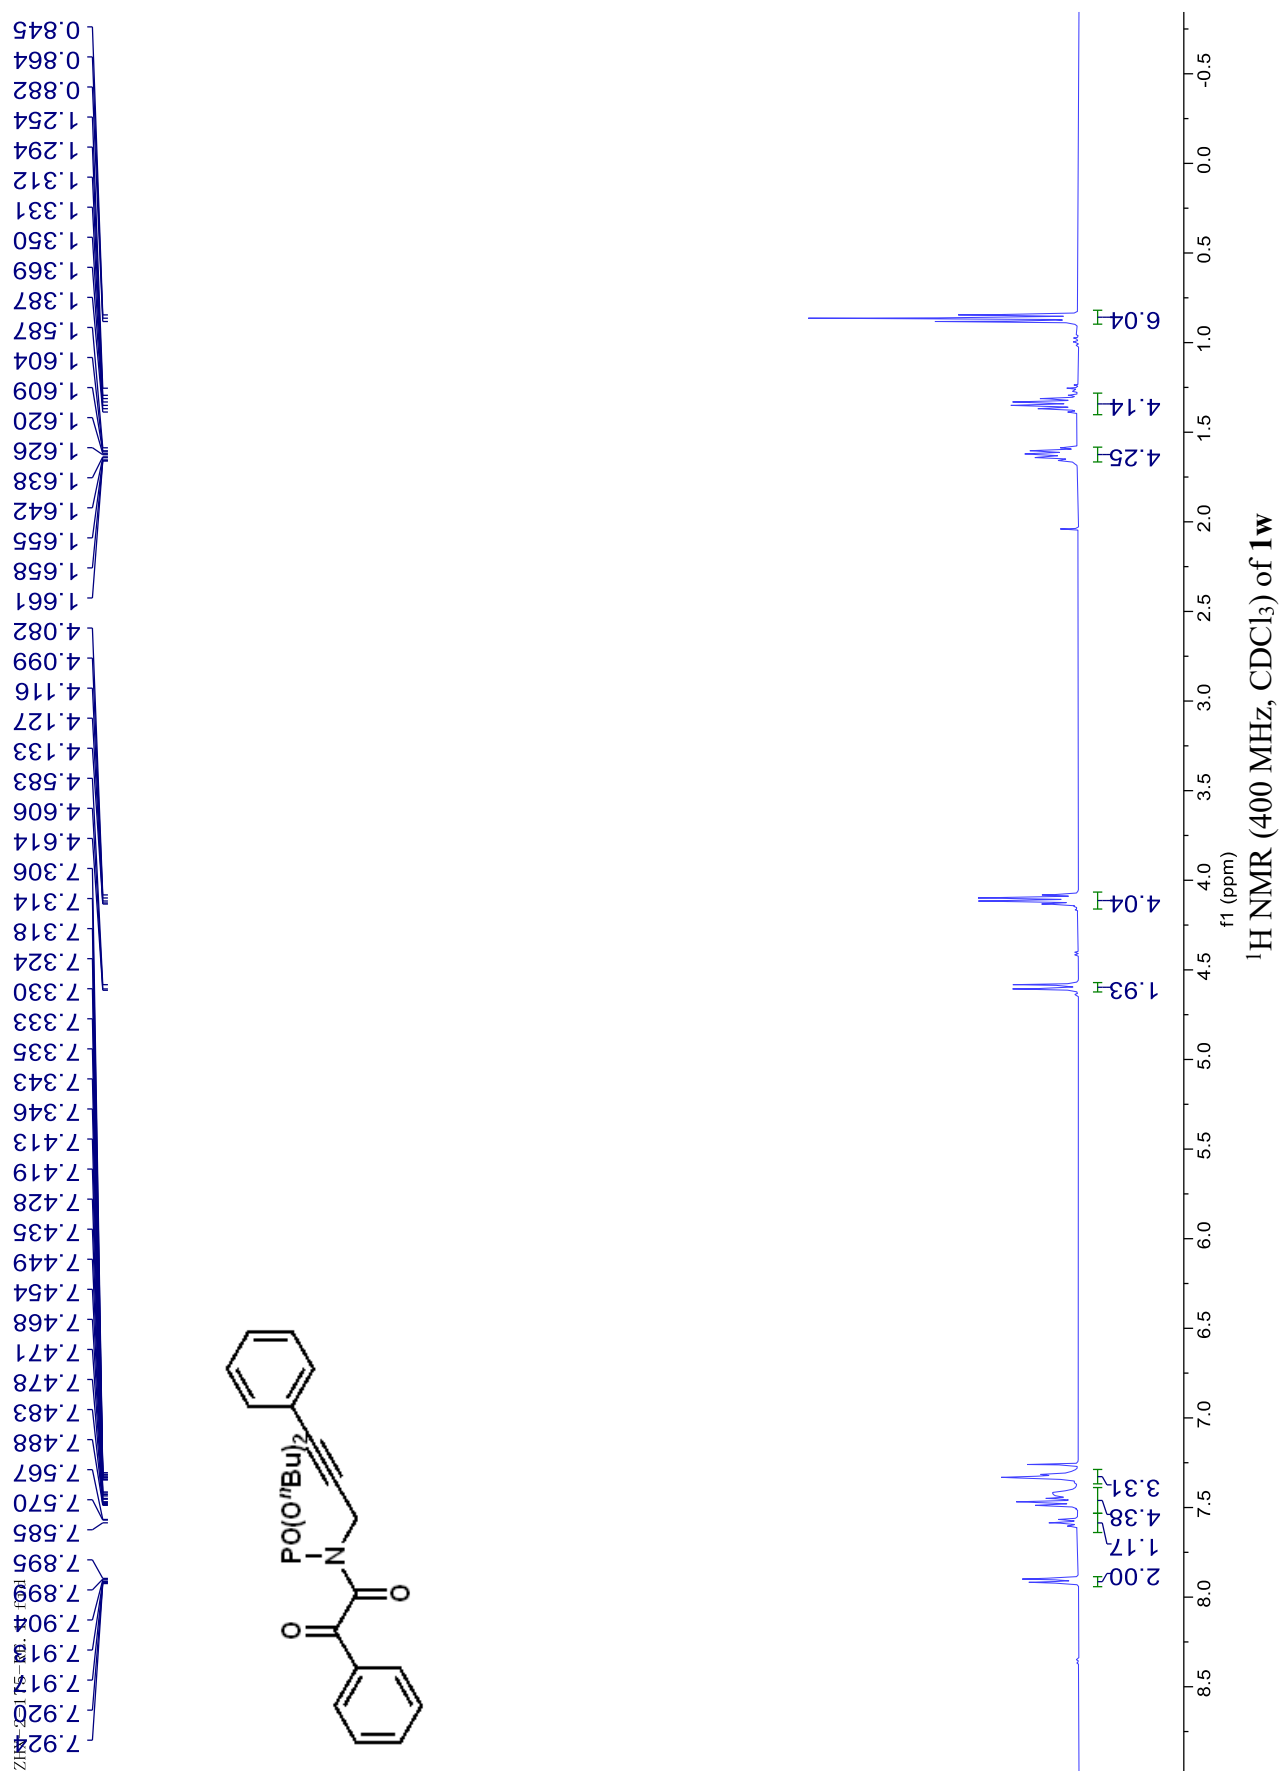

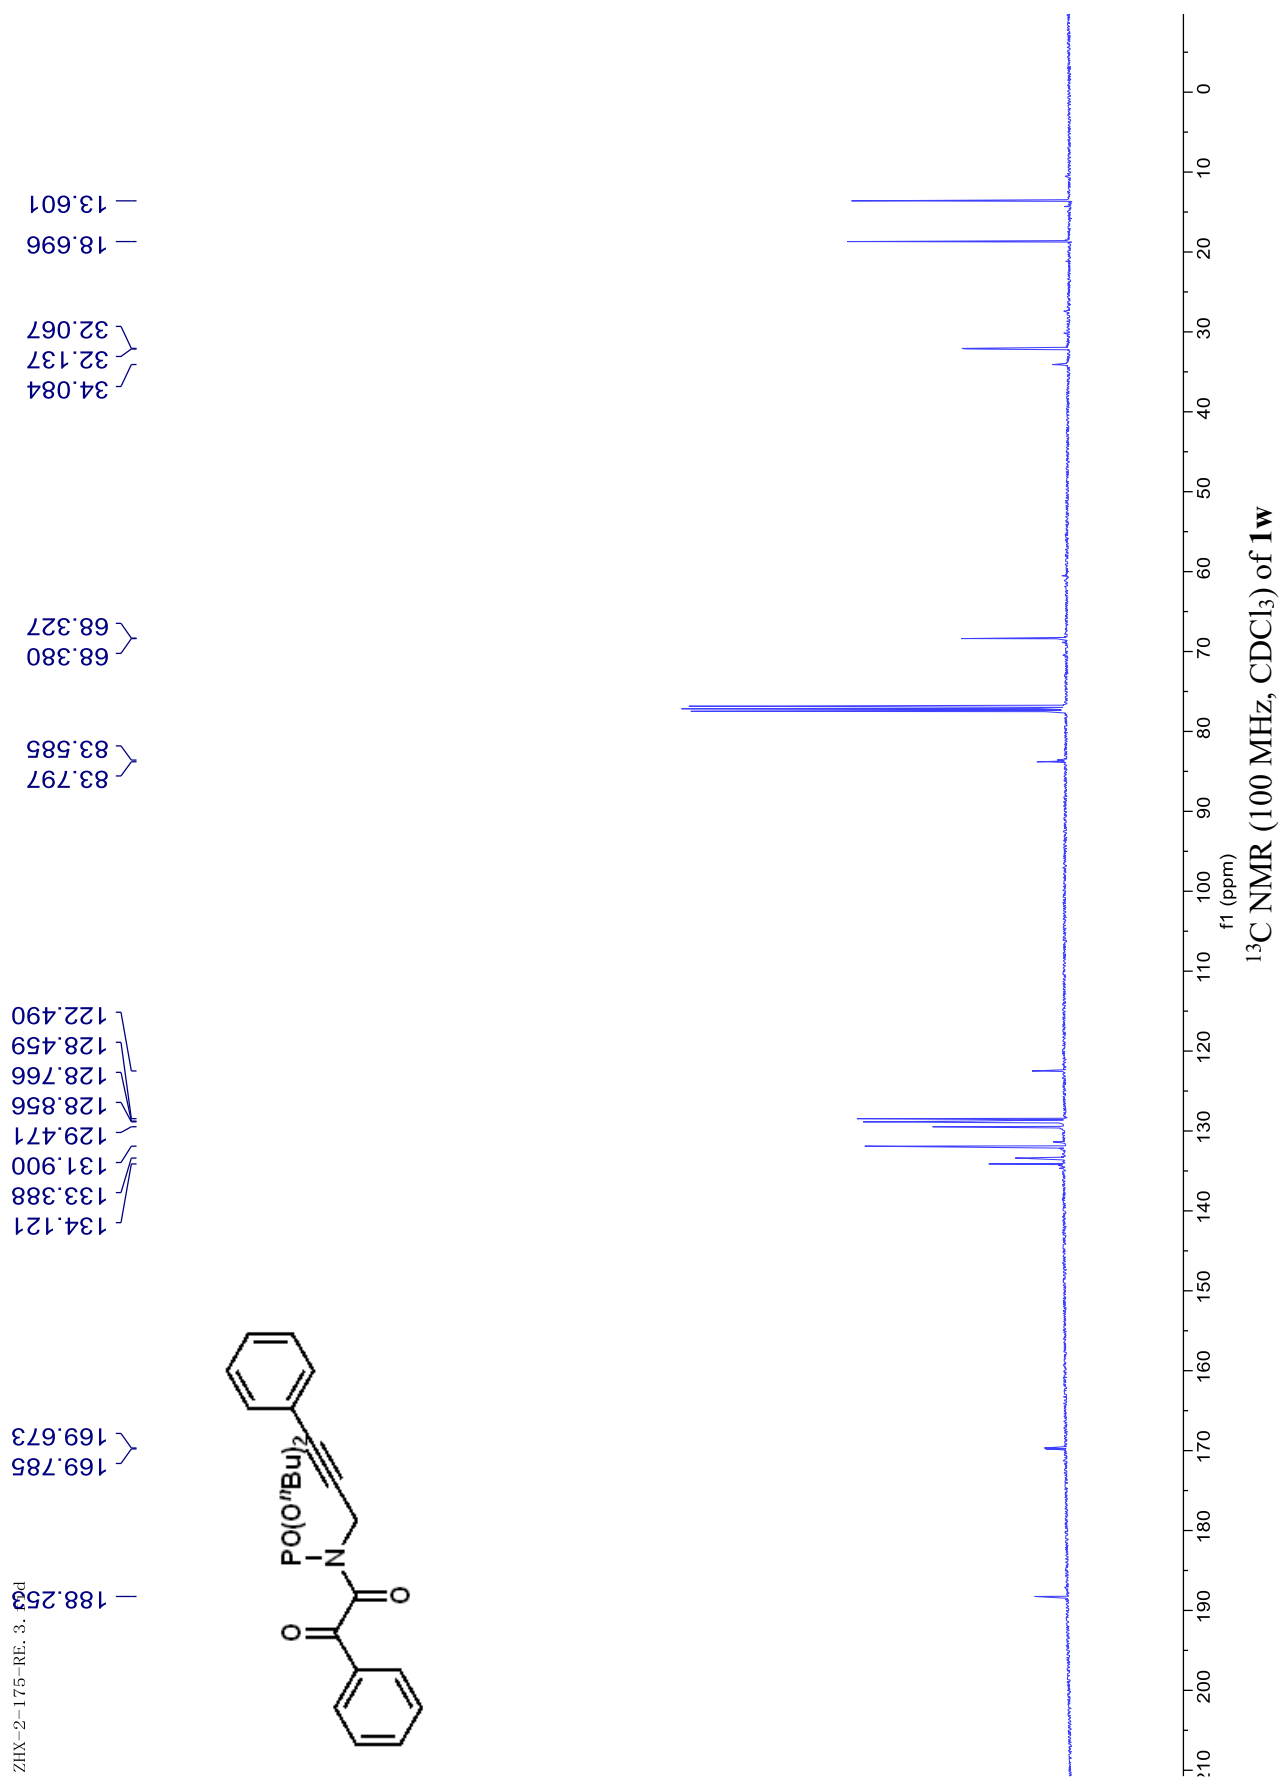

ZHX-2-175-1. 3. f1.d

-0.805

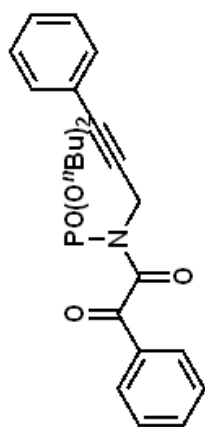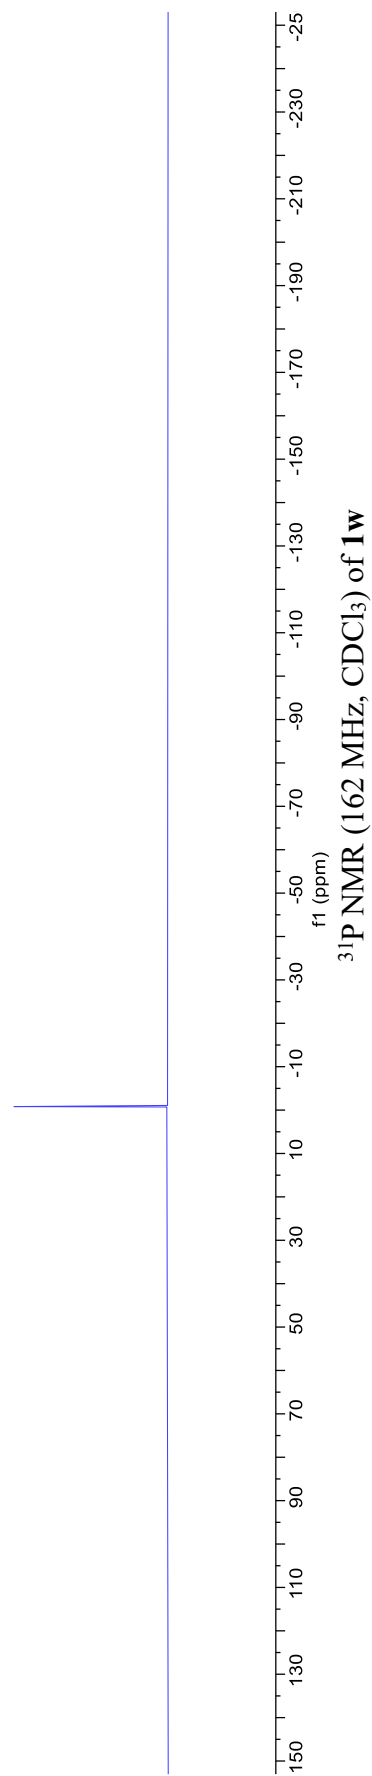

ZHX-3-46-1-RE. 1. f1d

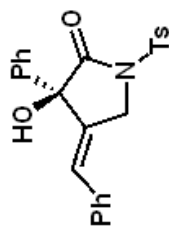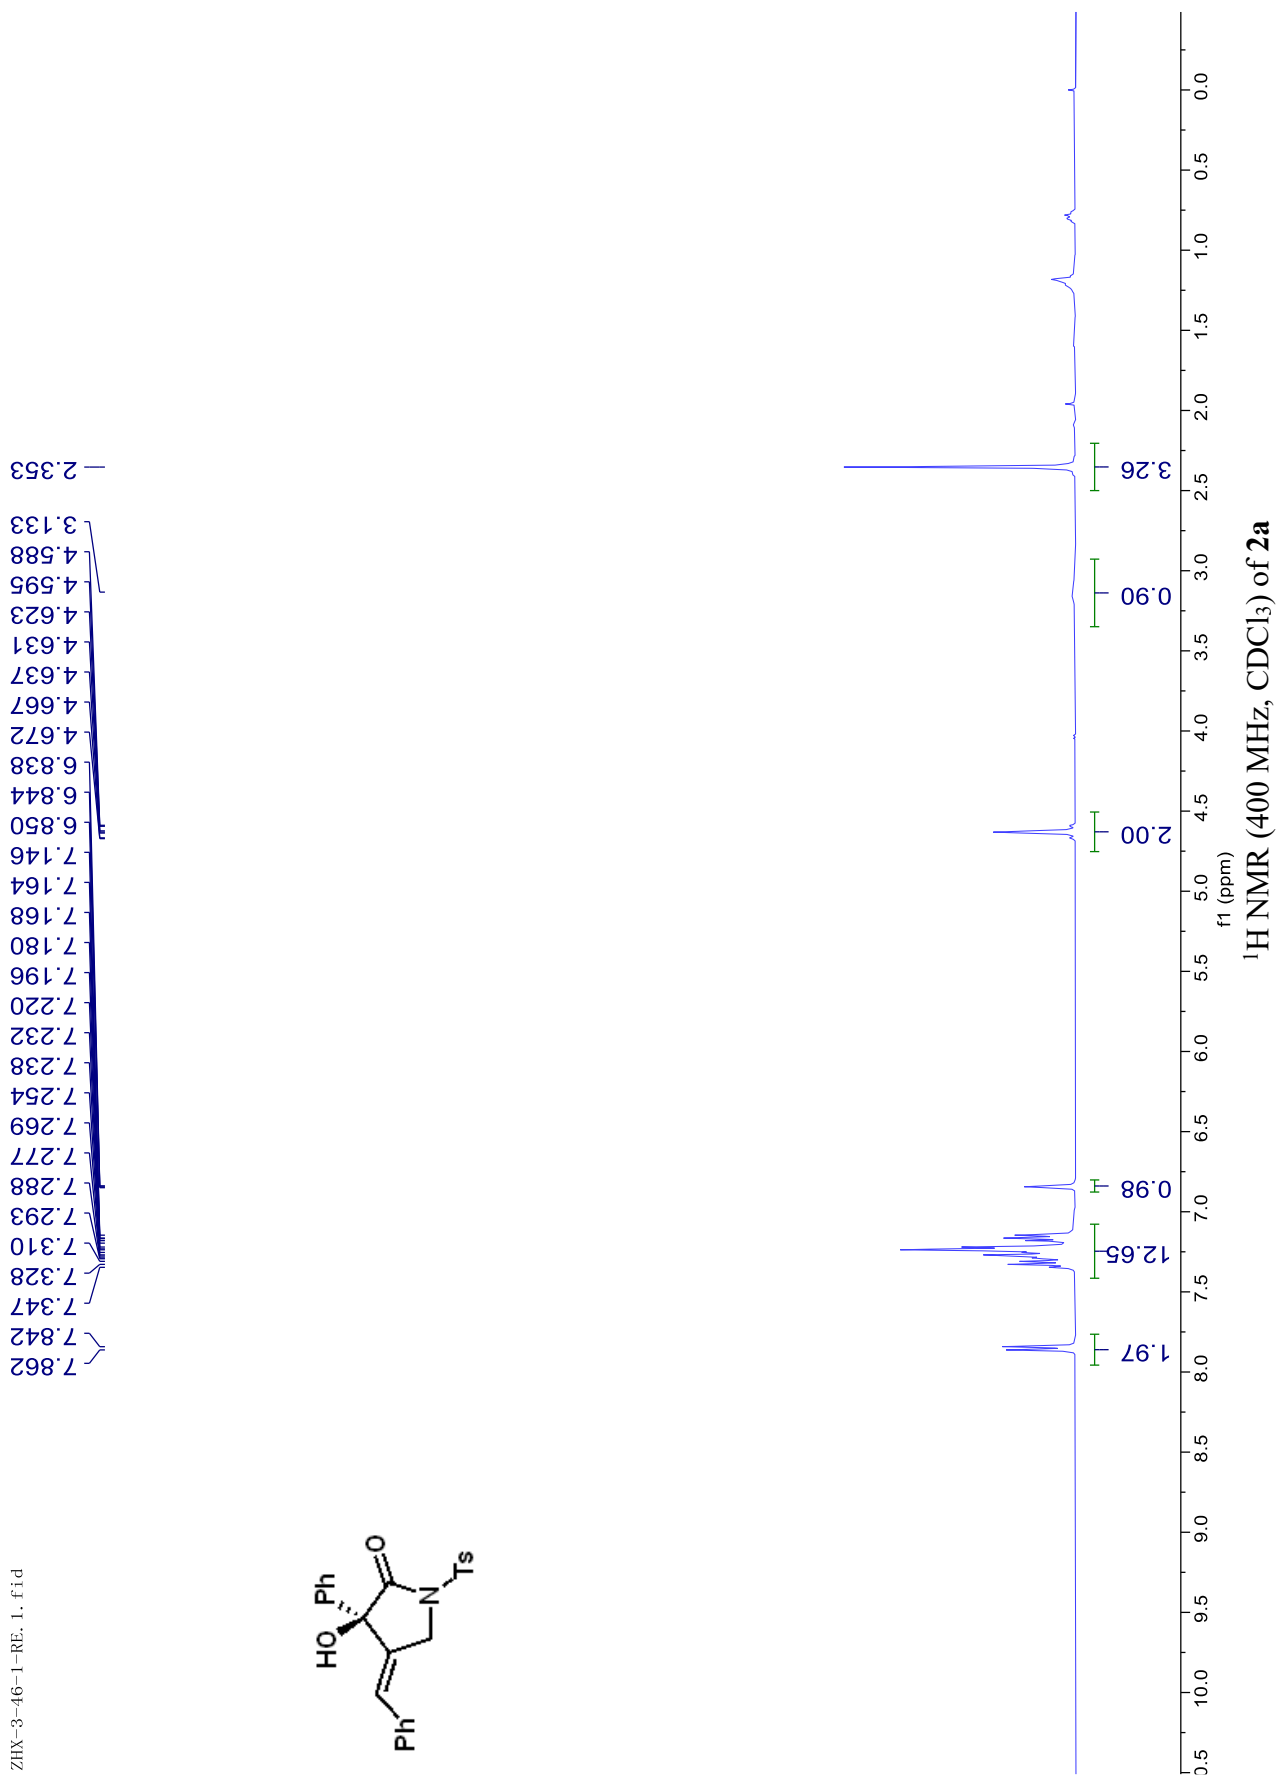

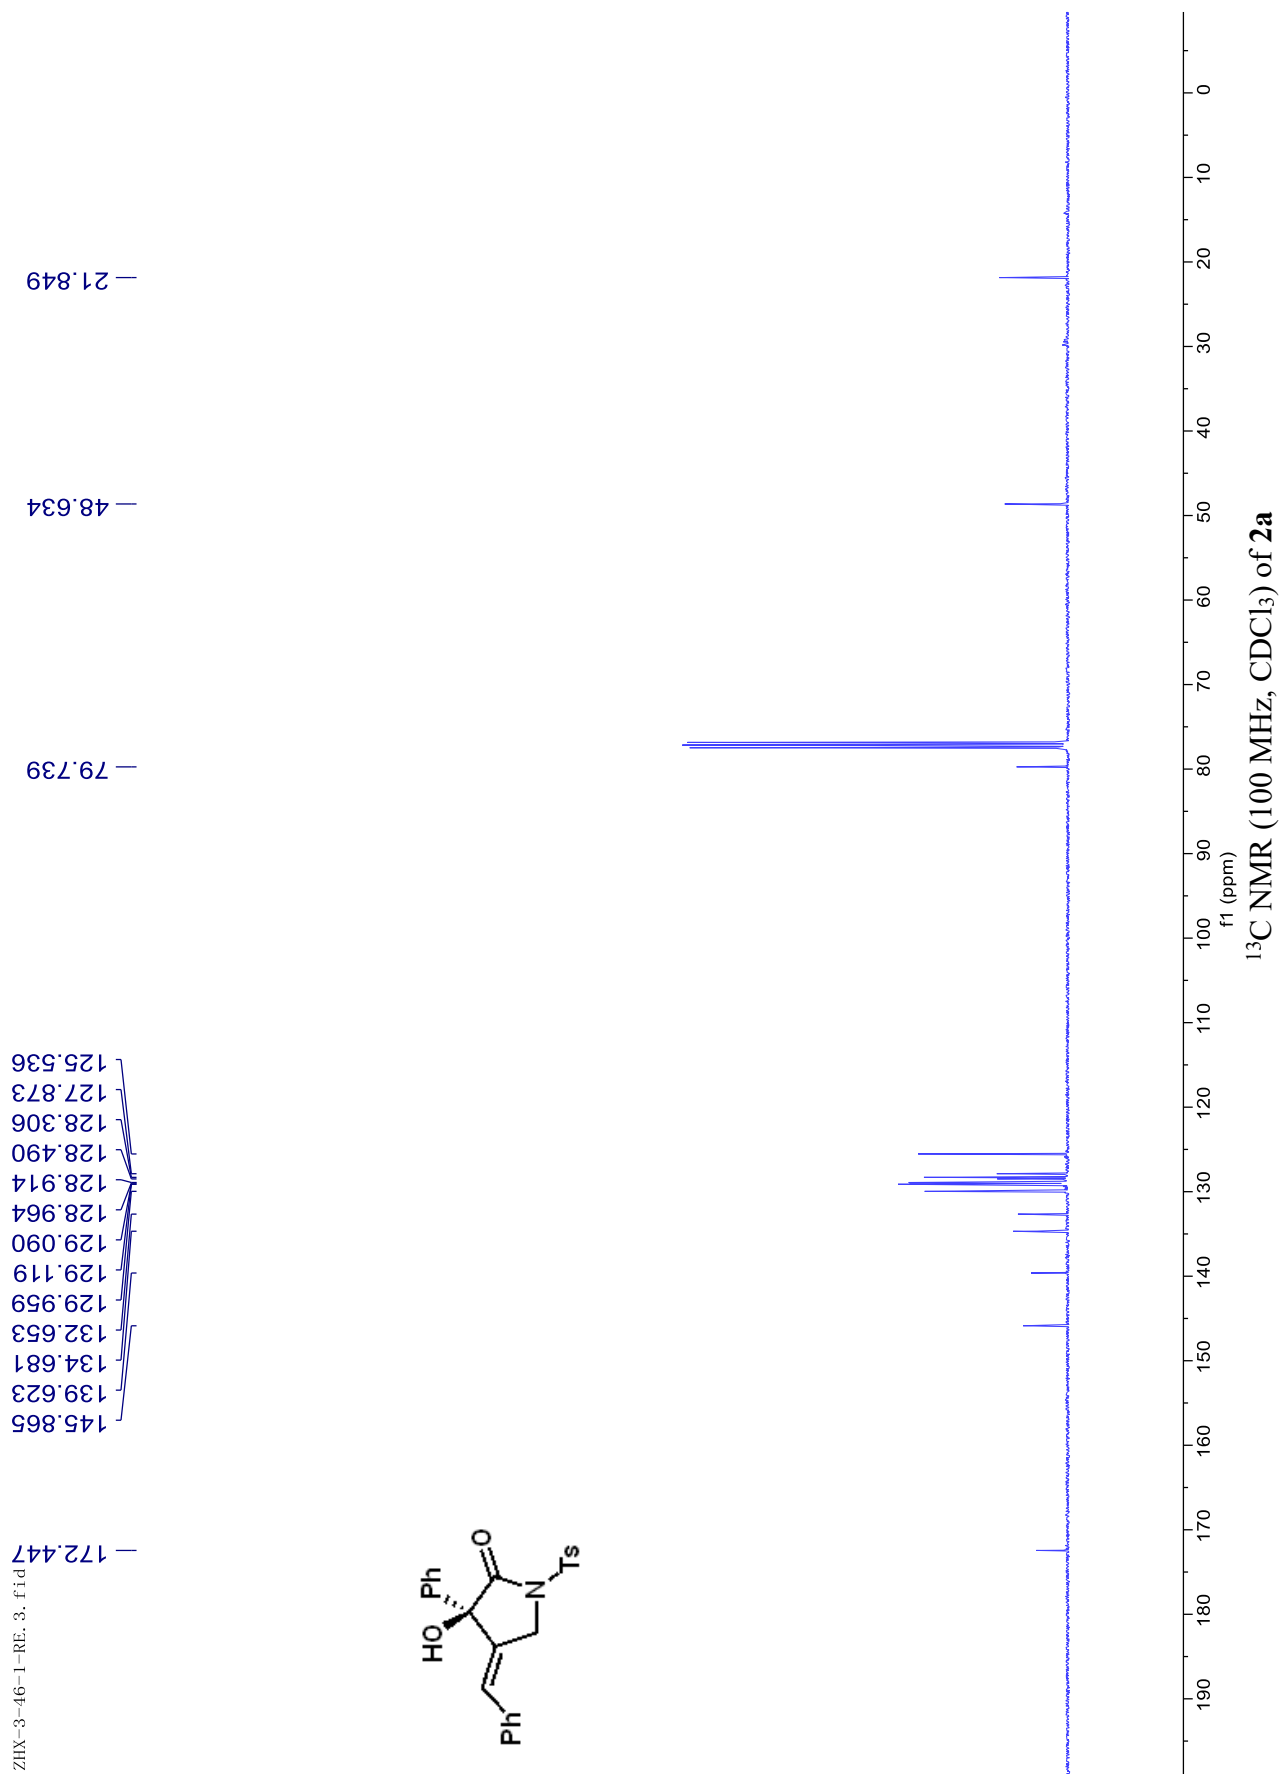

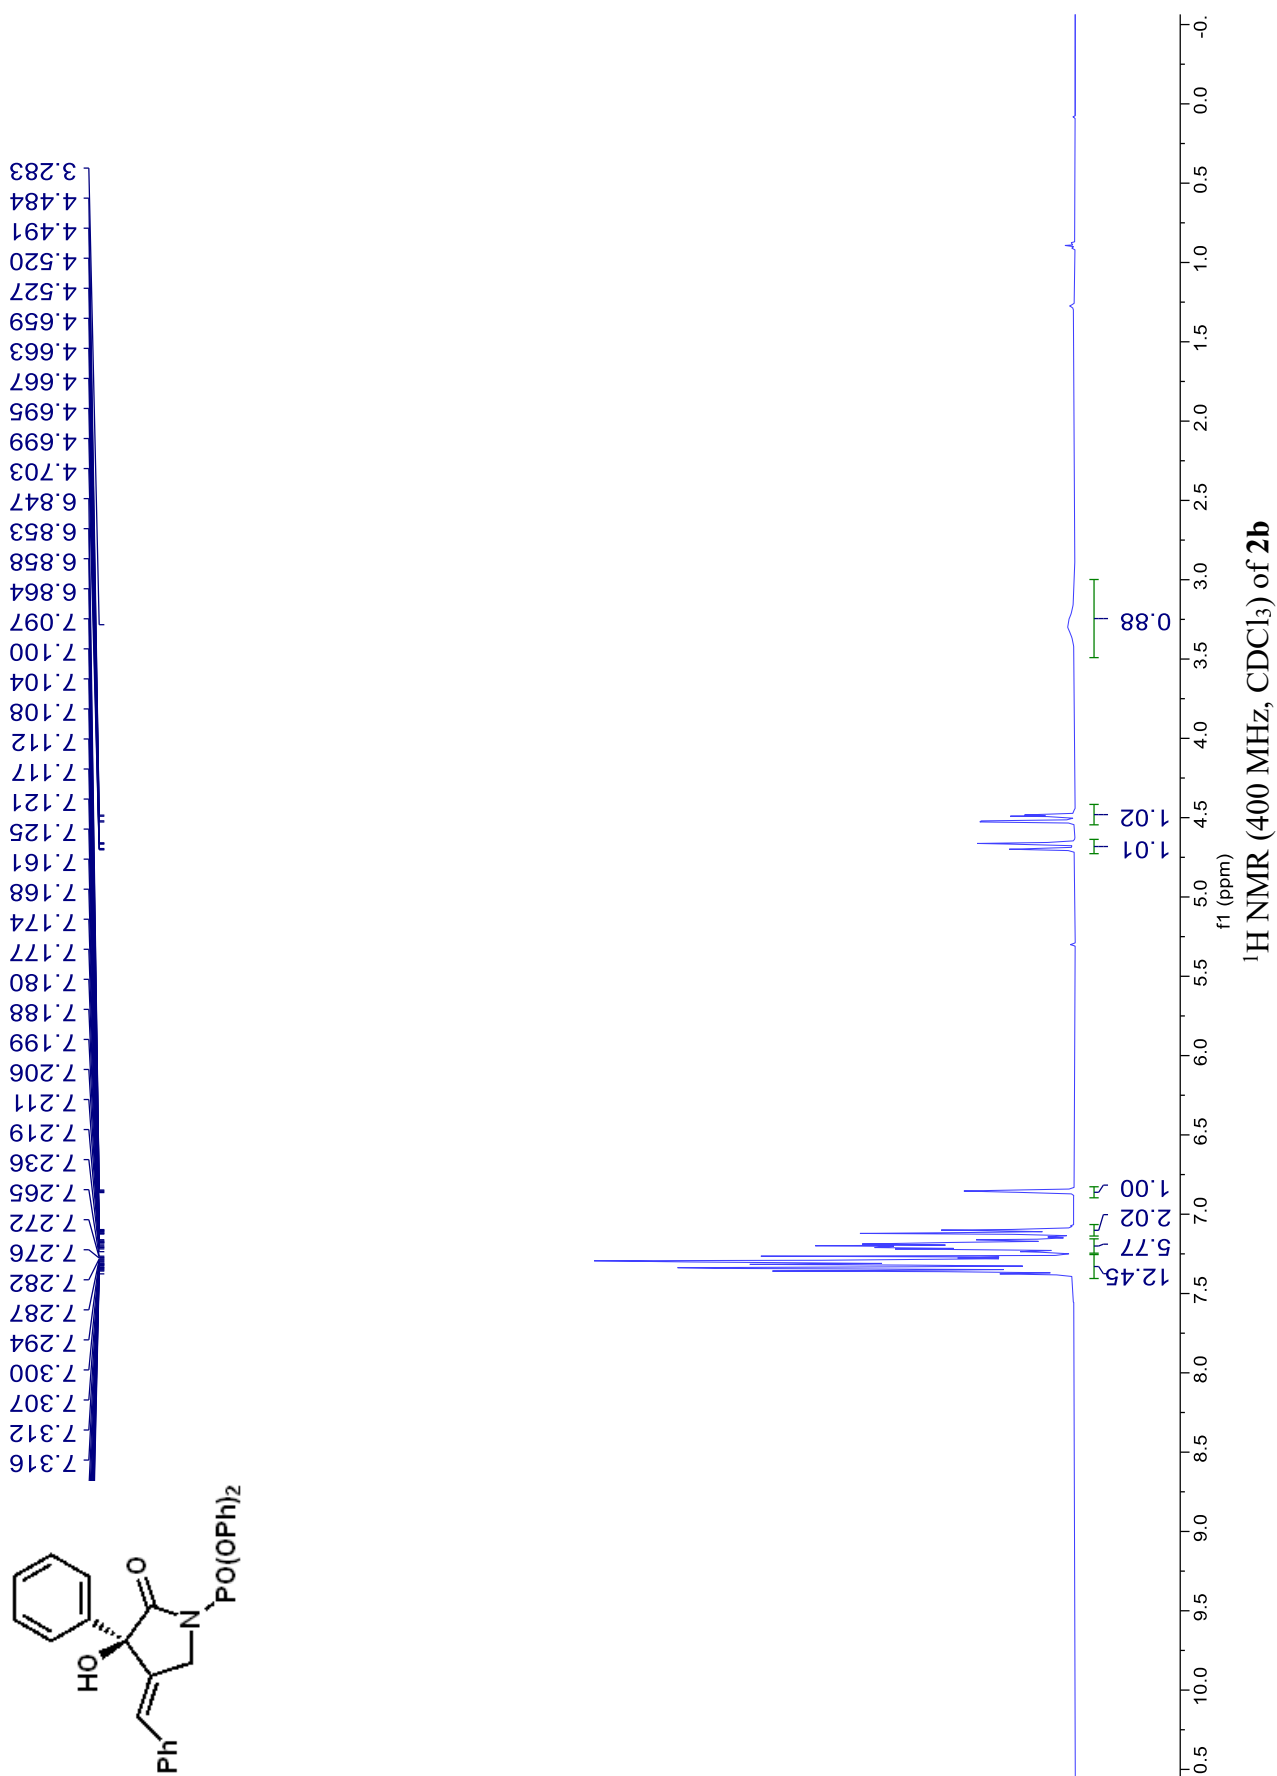





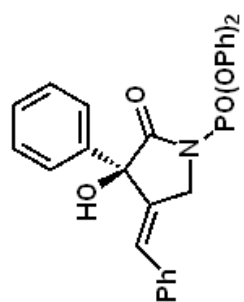

--12.513

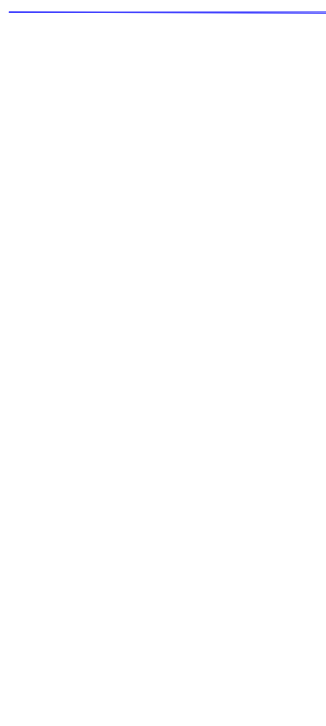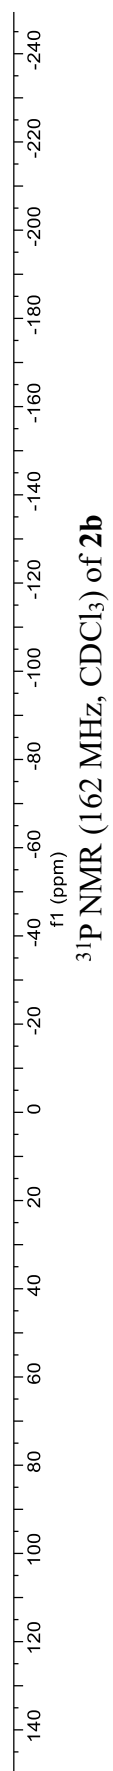

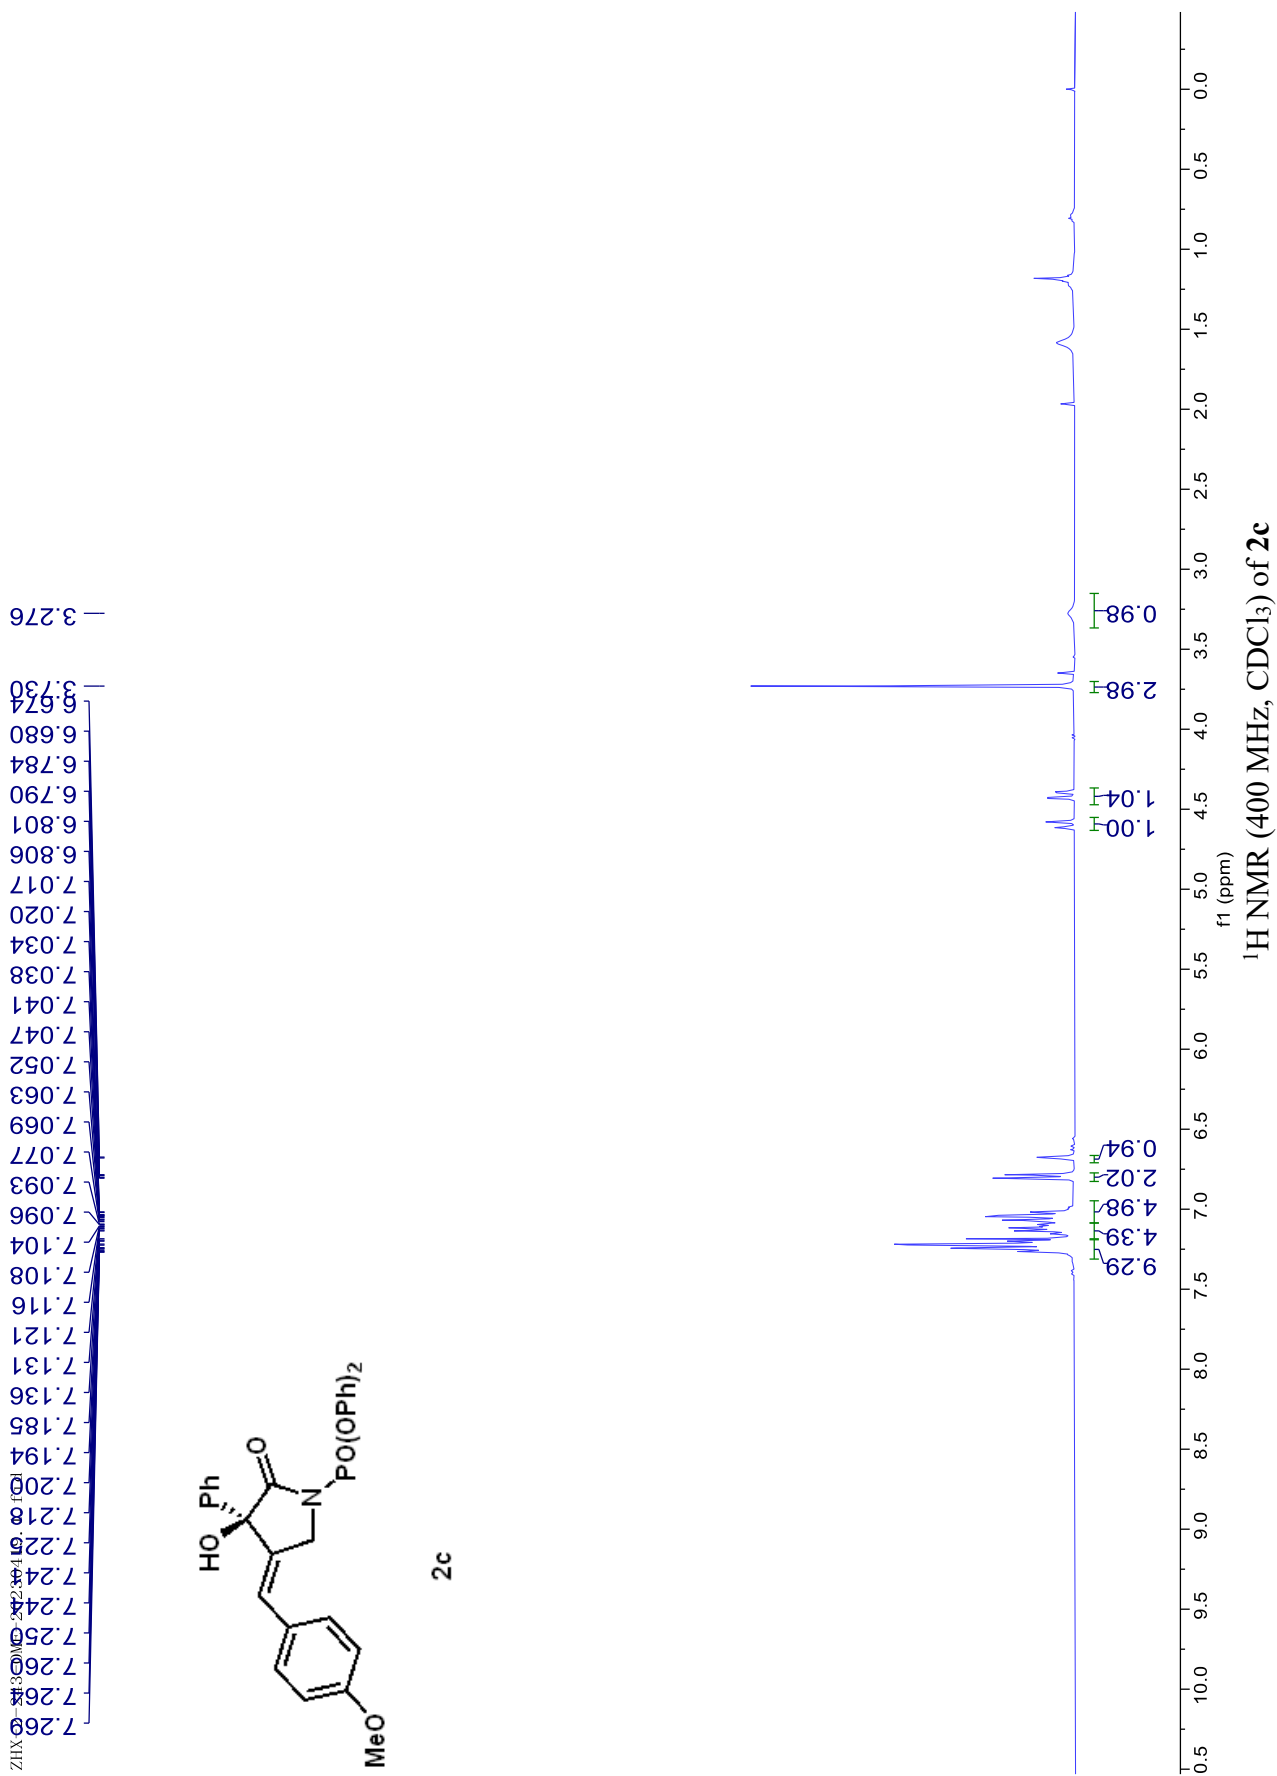

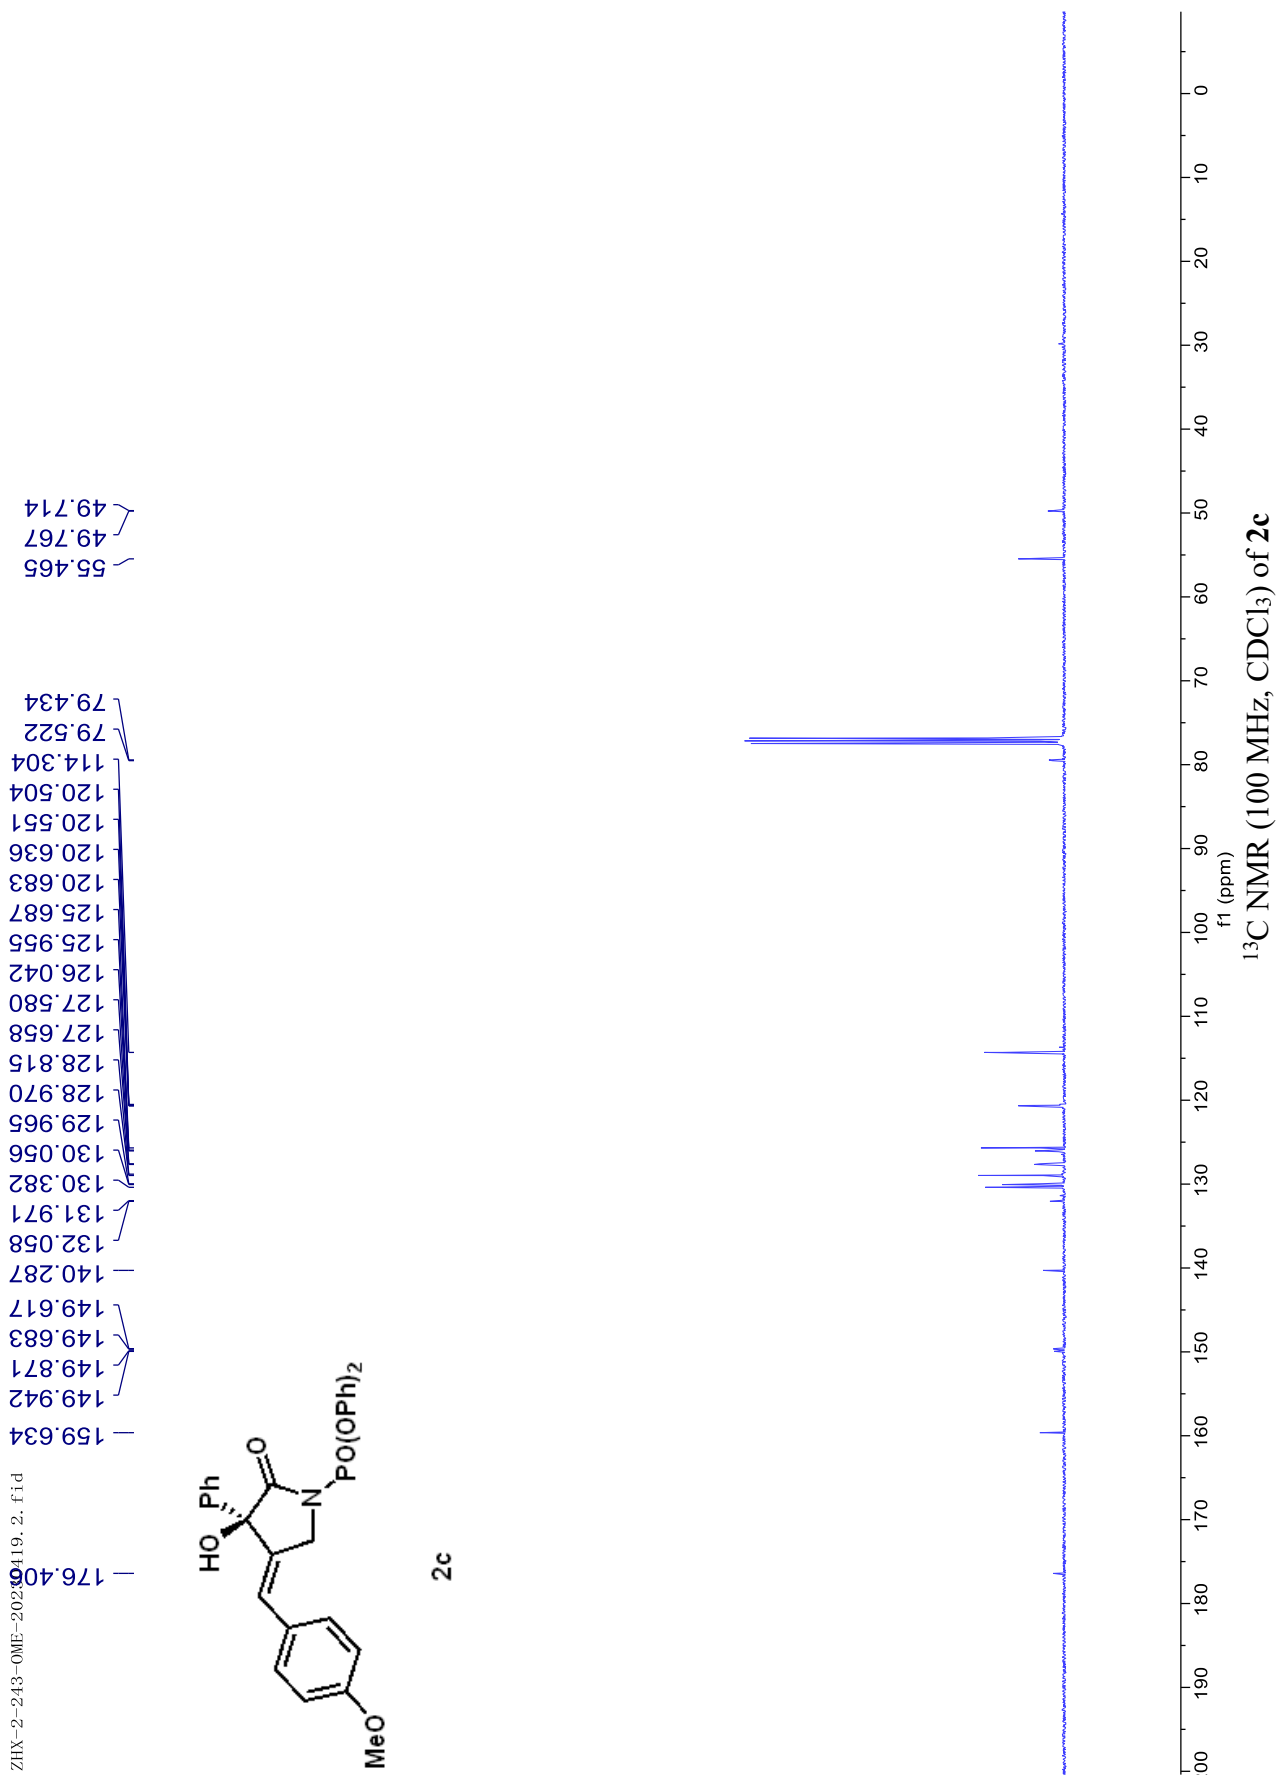

ZHX-2-243-OME-20230419\_3.fid

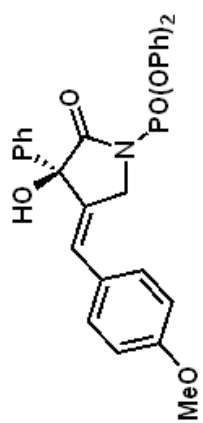

**2c**

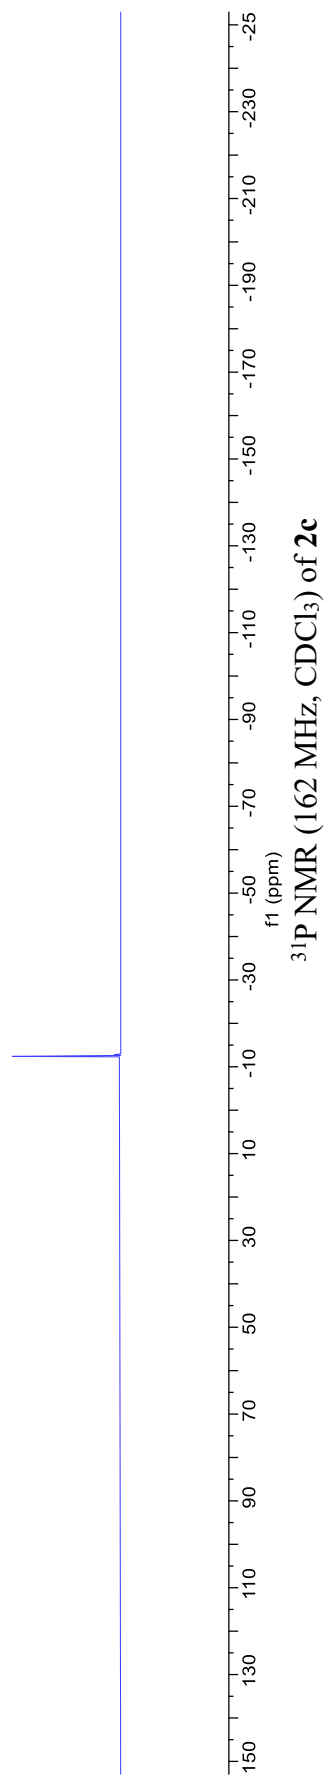

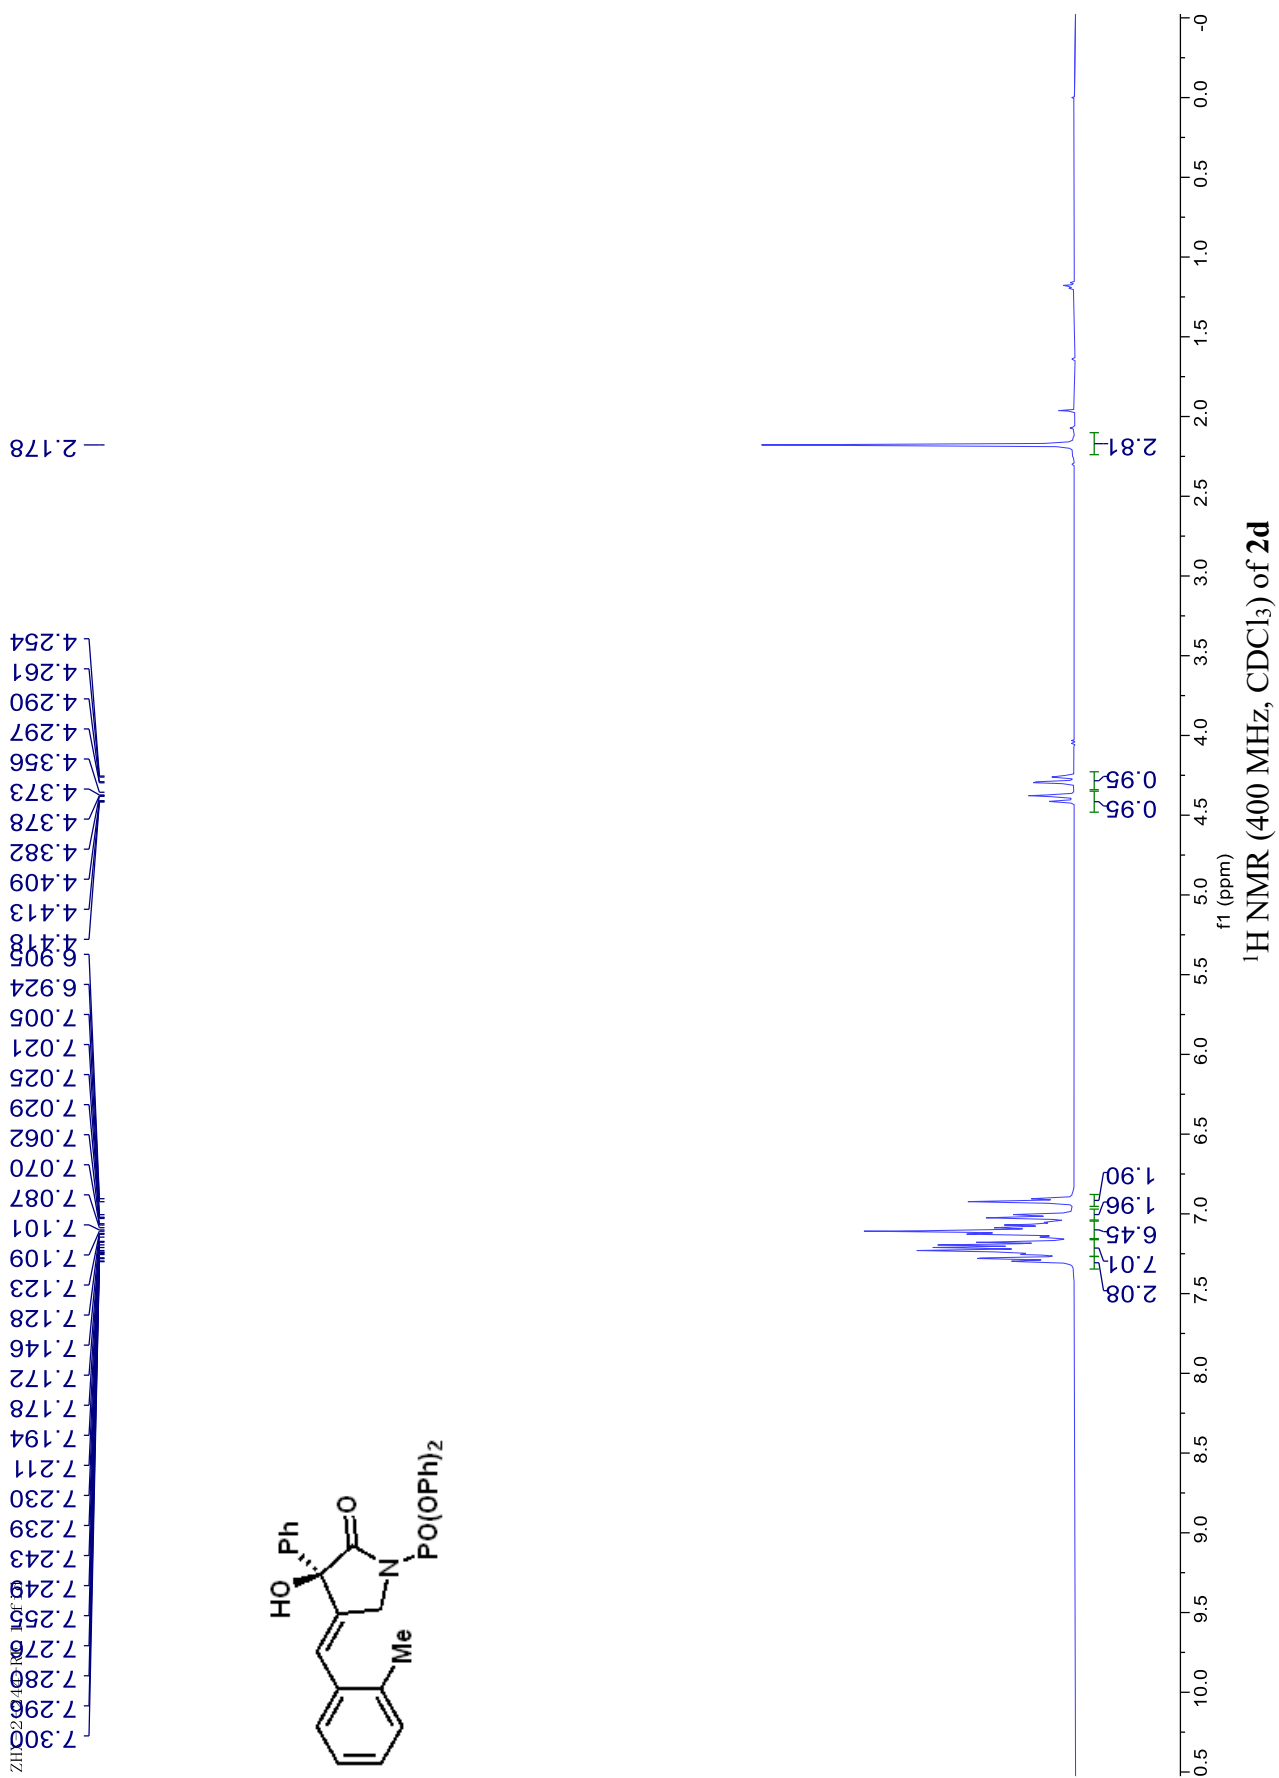

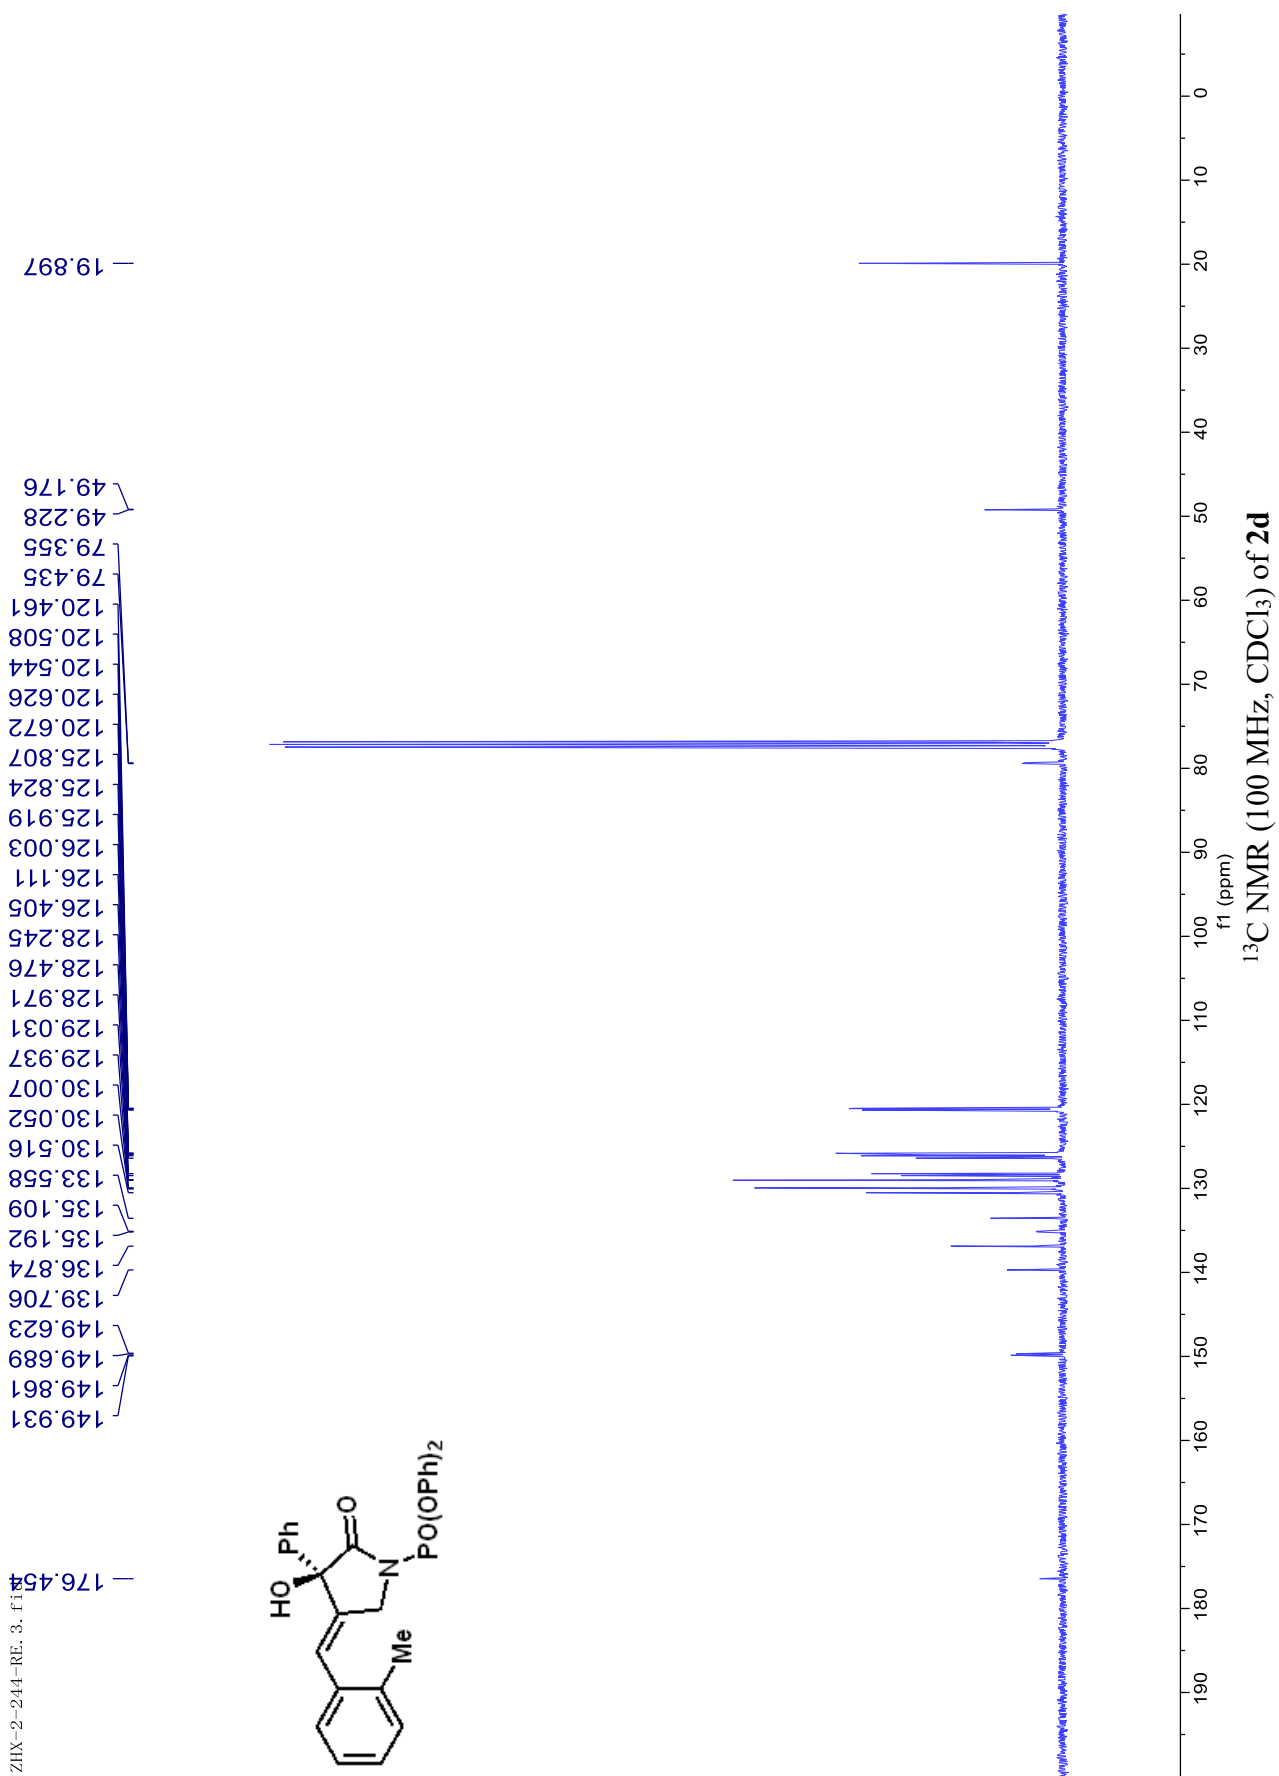

ZHX-2-244-RE. 2. fid

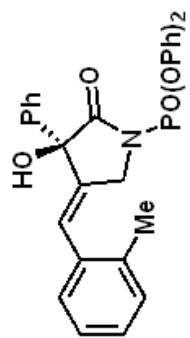

-12.426

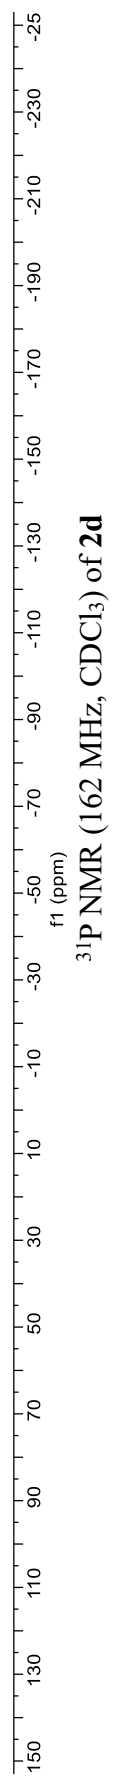



ZHX-2-257-RE-S. 1. fid

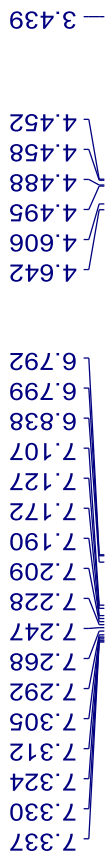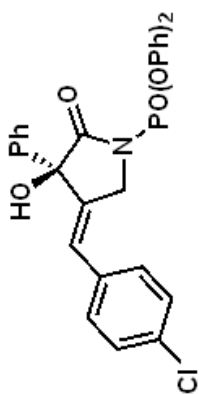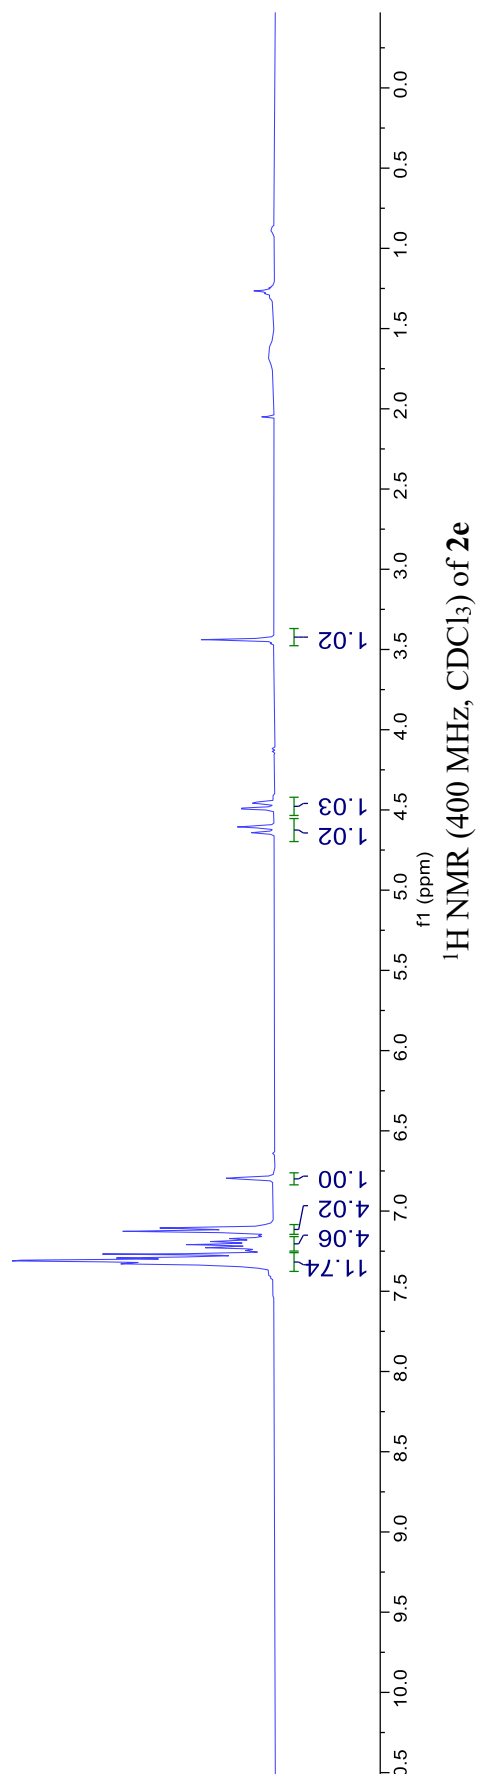



ZHX-2-257-RE-S. 2. f1.d

-12.594

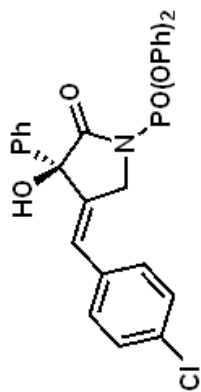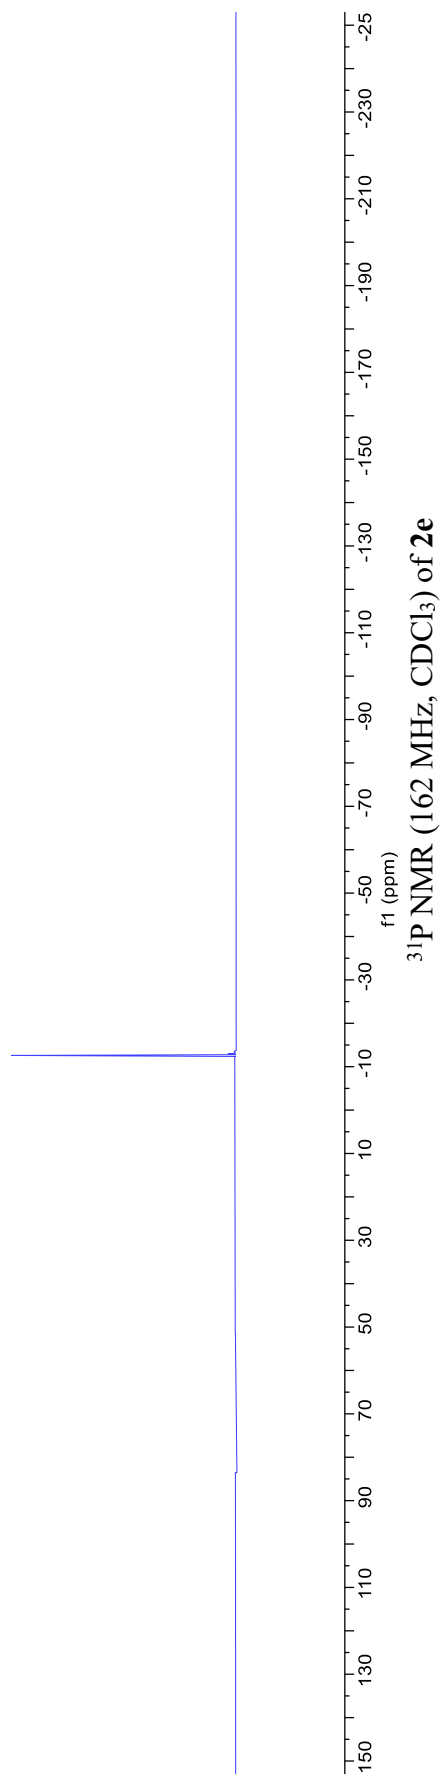

ZHX-2-243-RE. 1. fid

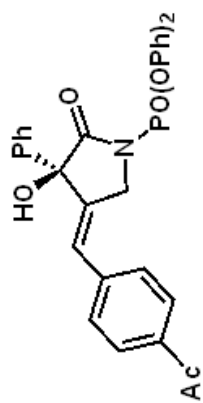

7.846  
7.826  
7.255  
7.238  
7.221  
7.207  
7.200  
7.191  
7.184  
7.170  
7.146  
7.127  
7.106  
7.089  
7.071  
7.046  
7.027  
6.810  
6.804  
4.594  
4.558  
4.462  
4.455  
4.425  
4.419  
2.929  
2.903  
2.505

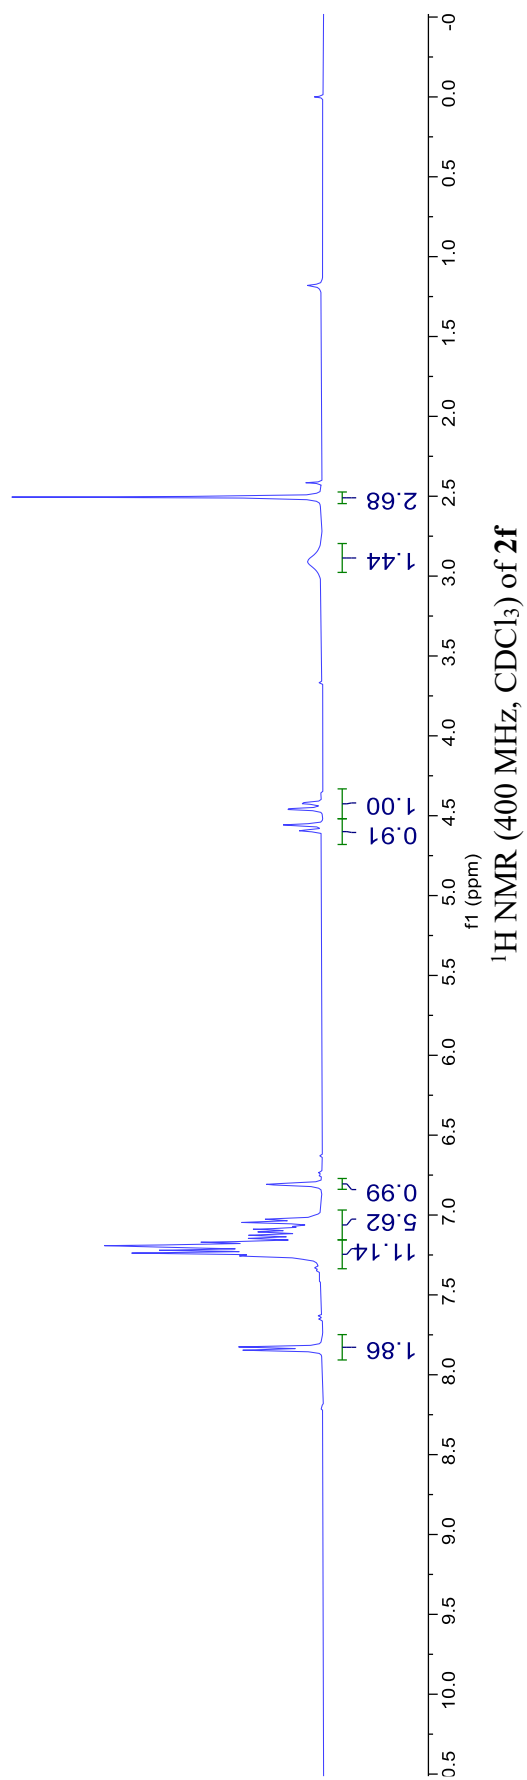

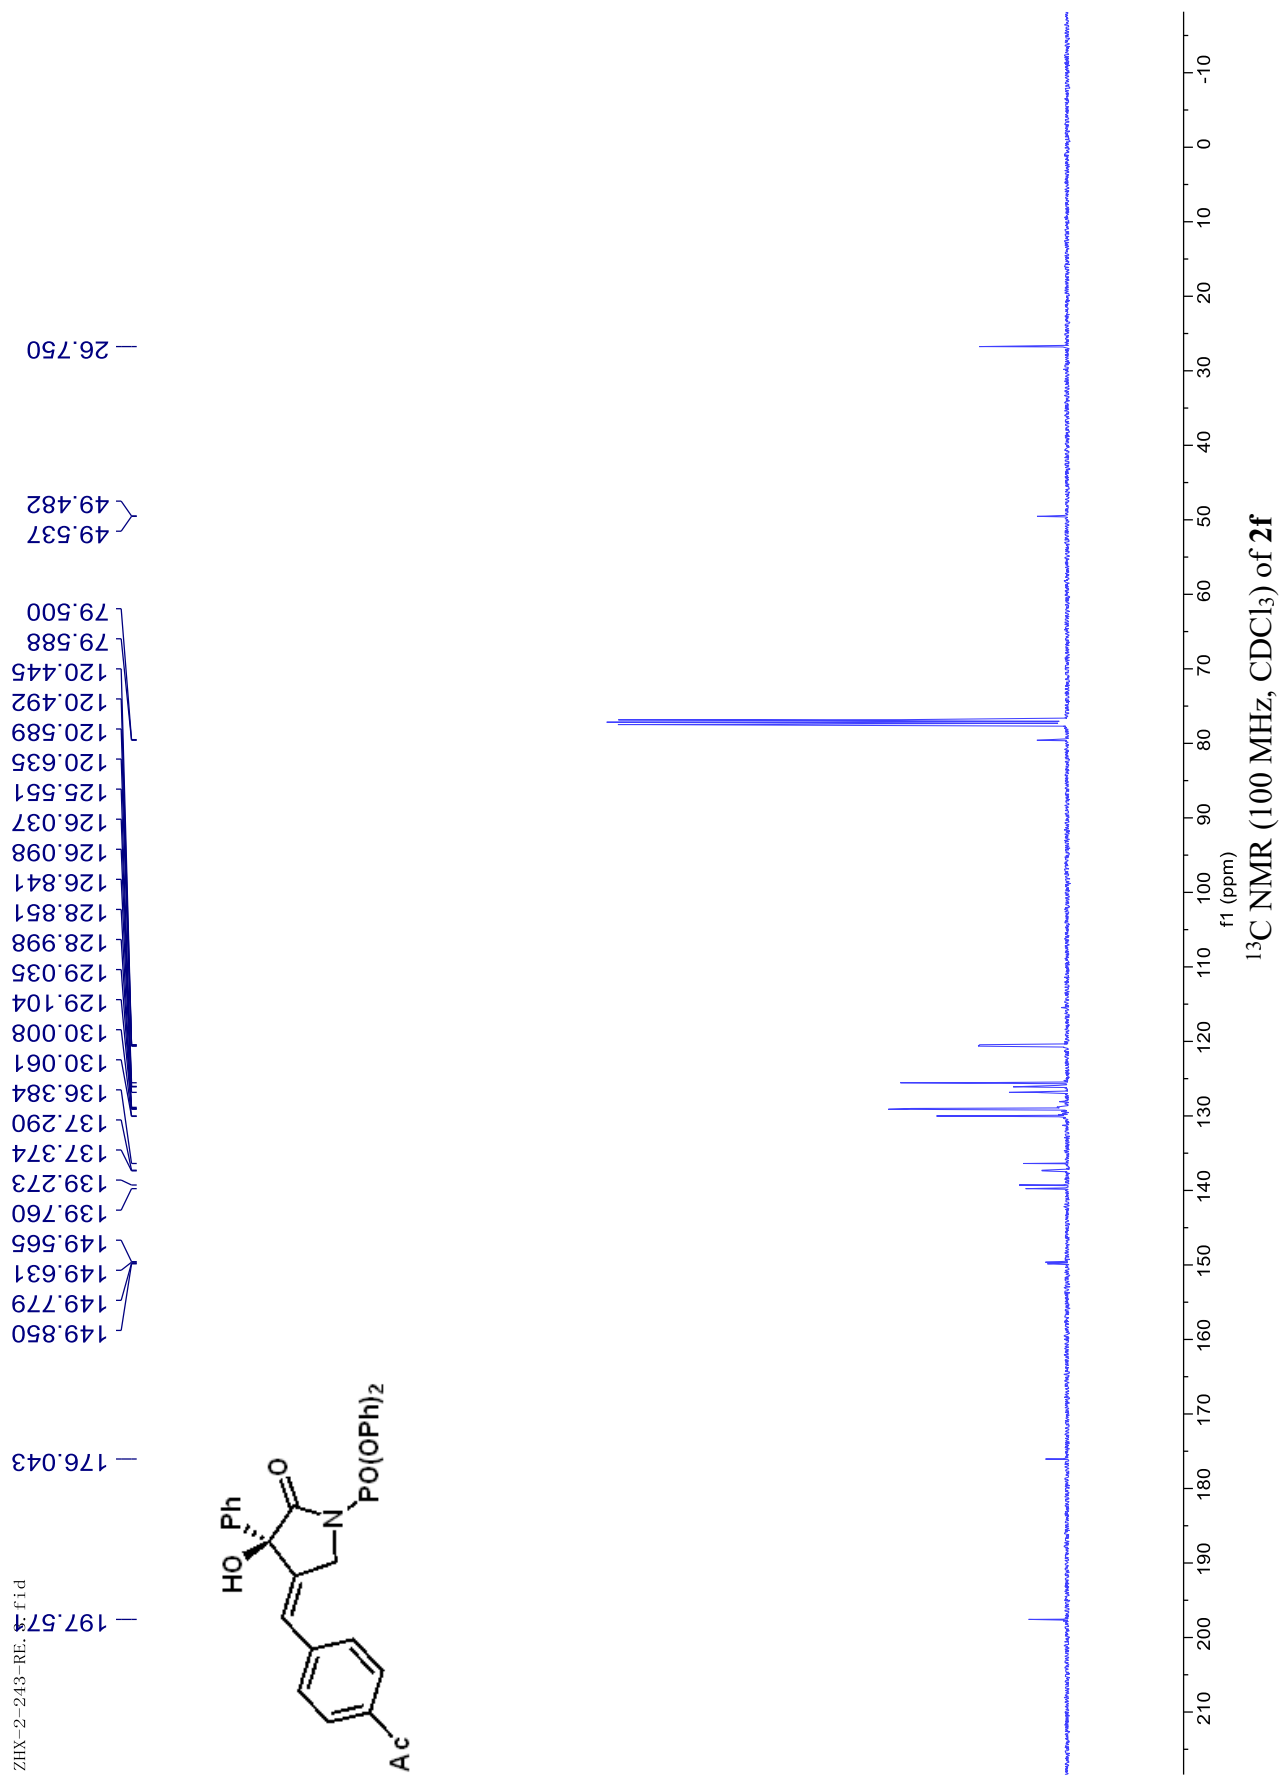

ZHX-2-243-CH. 3. fid

— -12.922

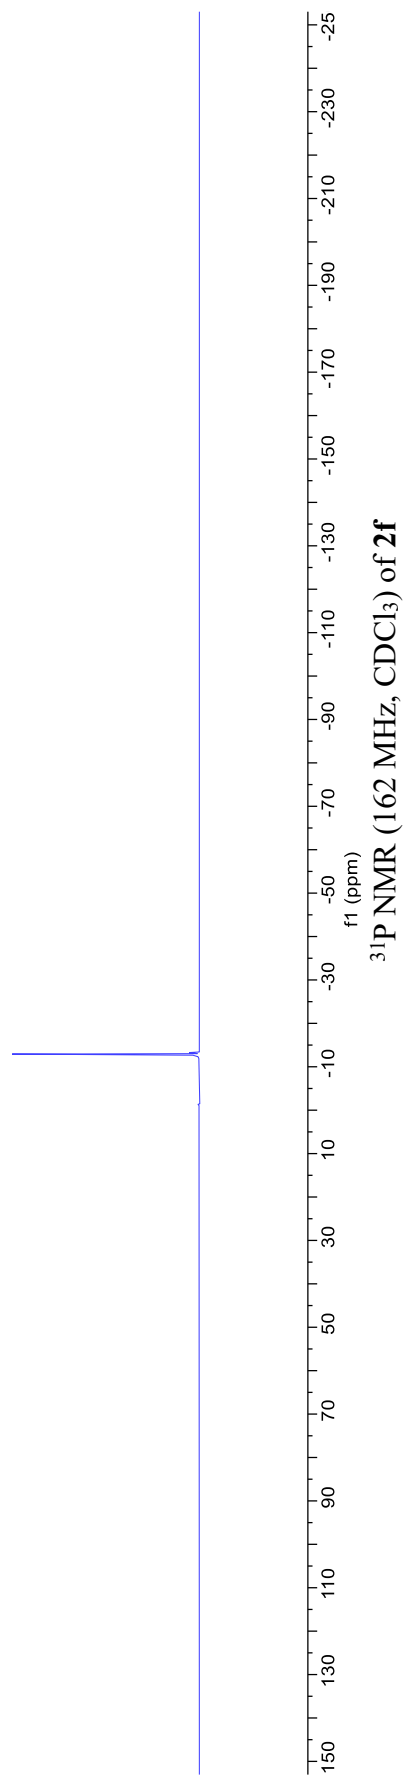

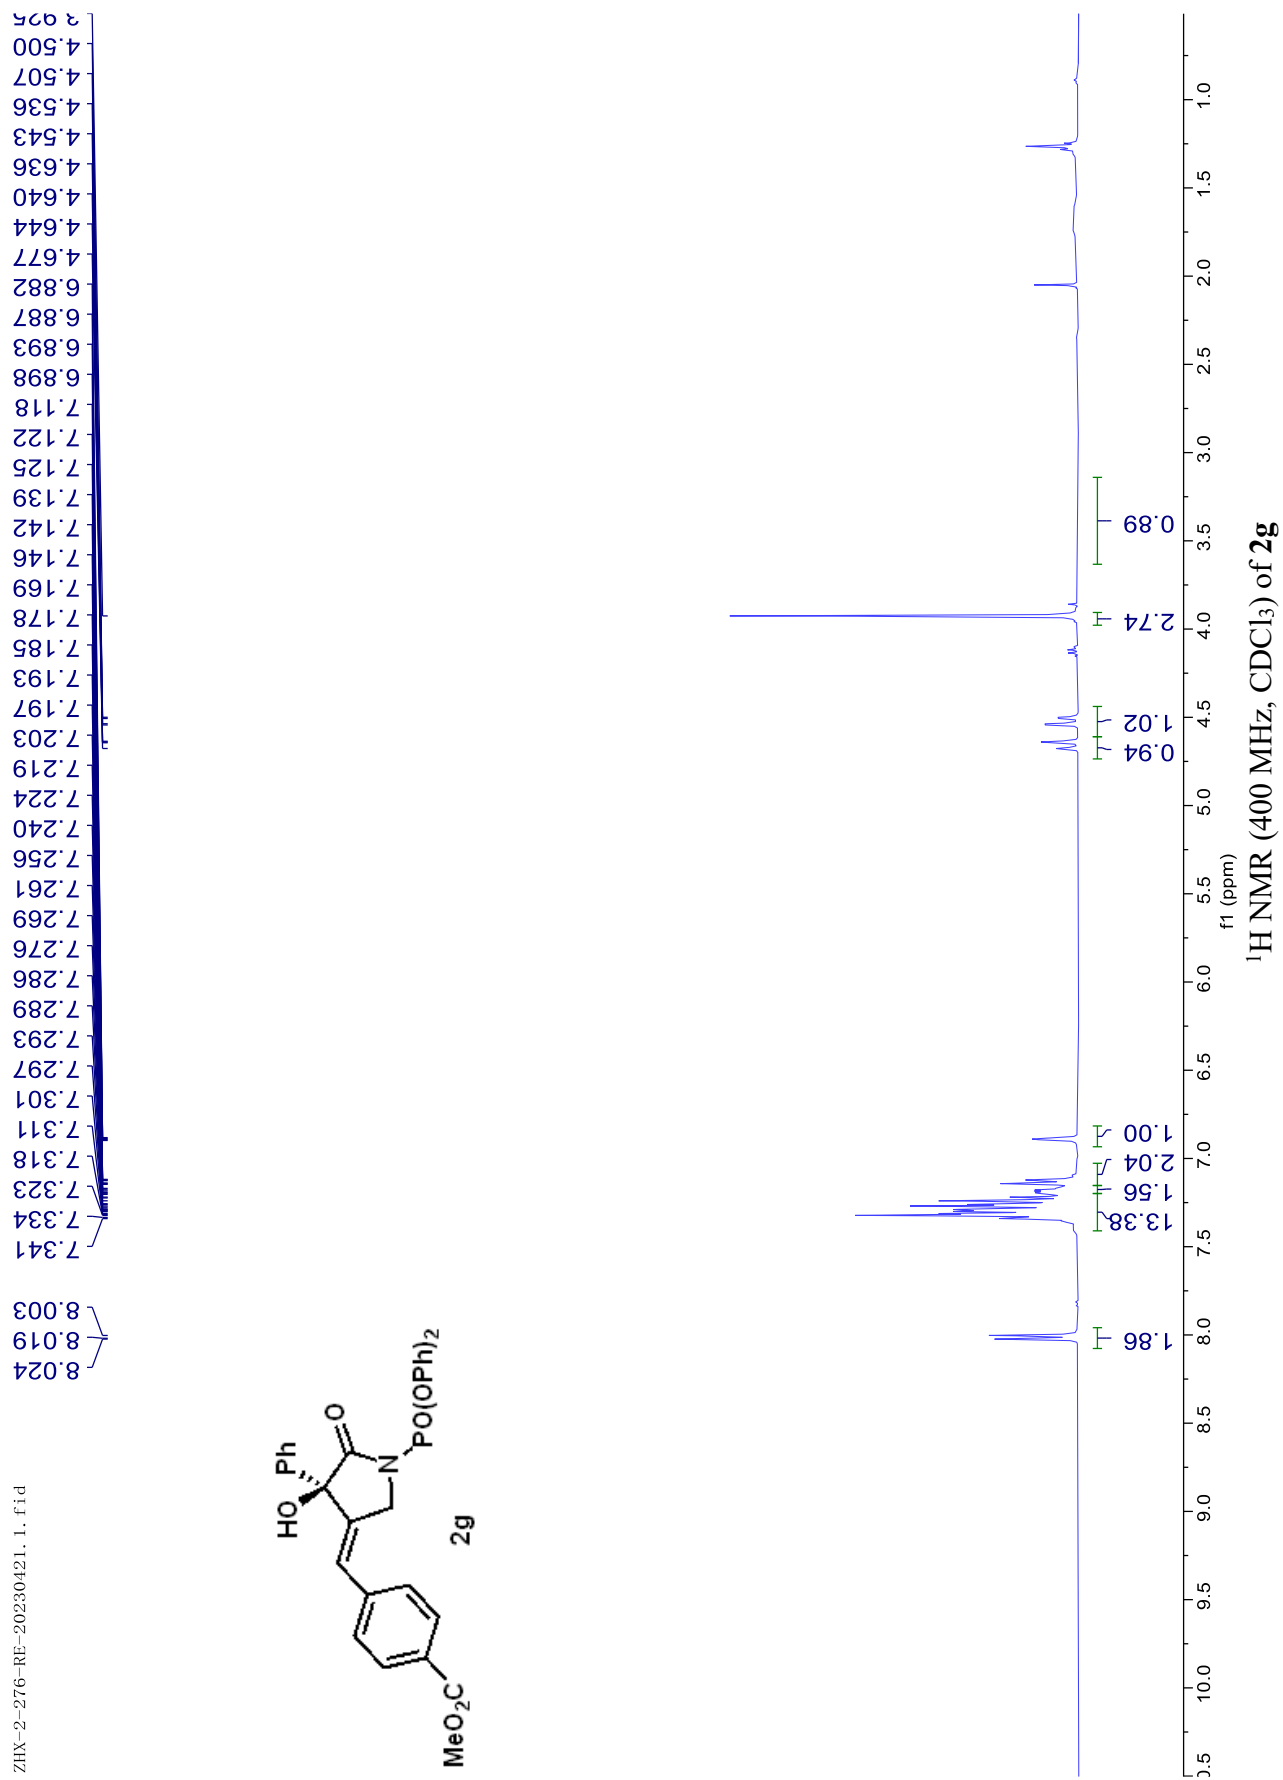

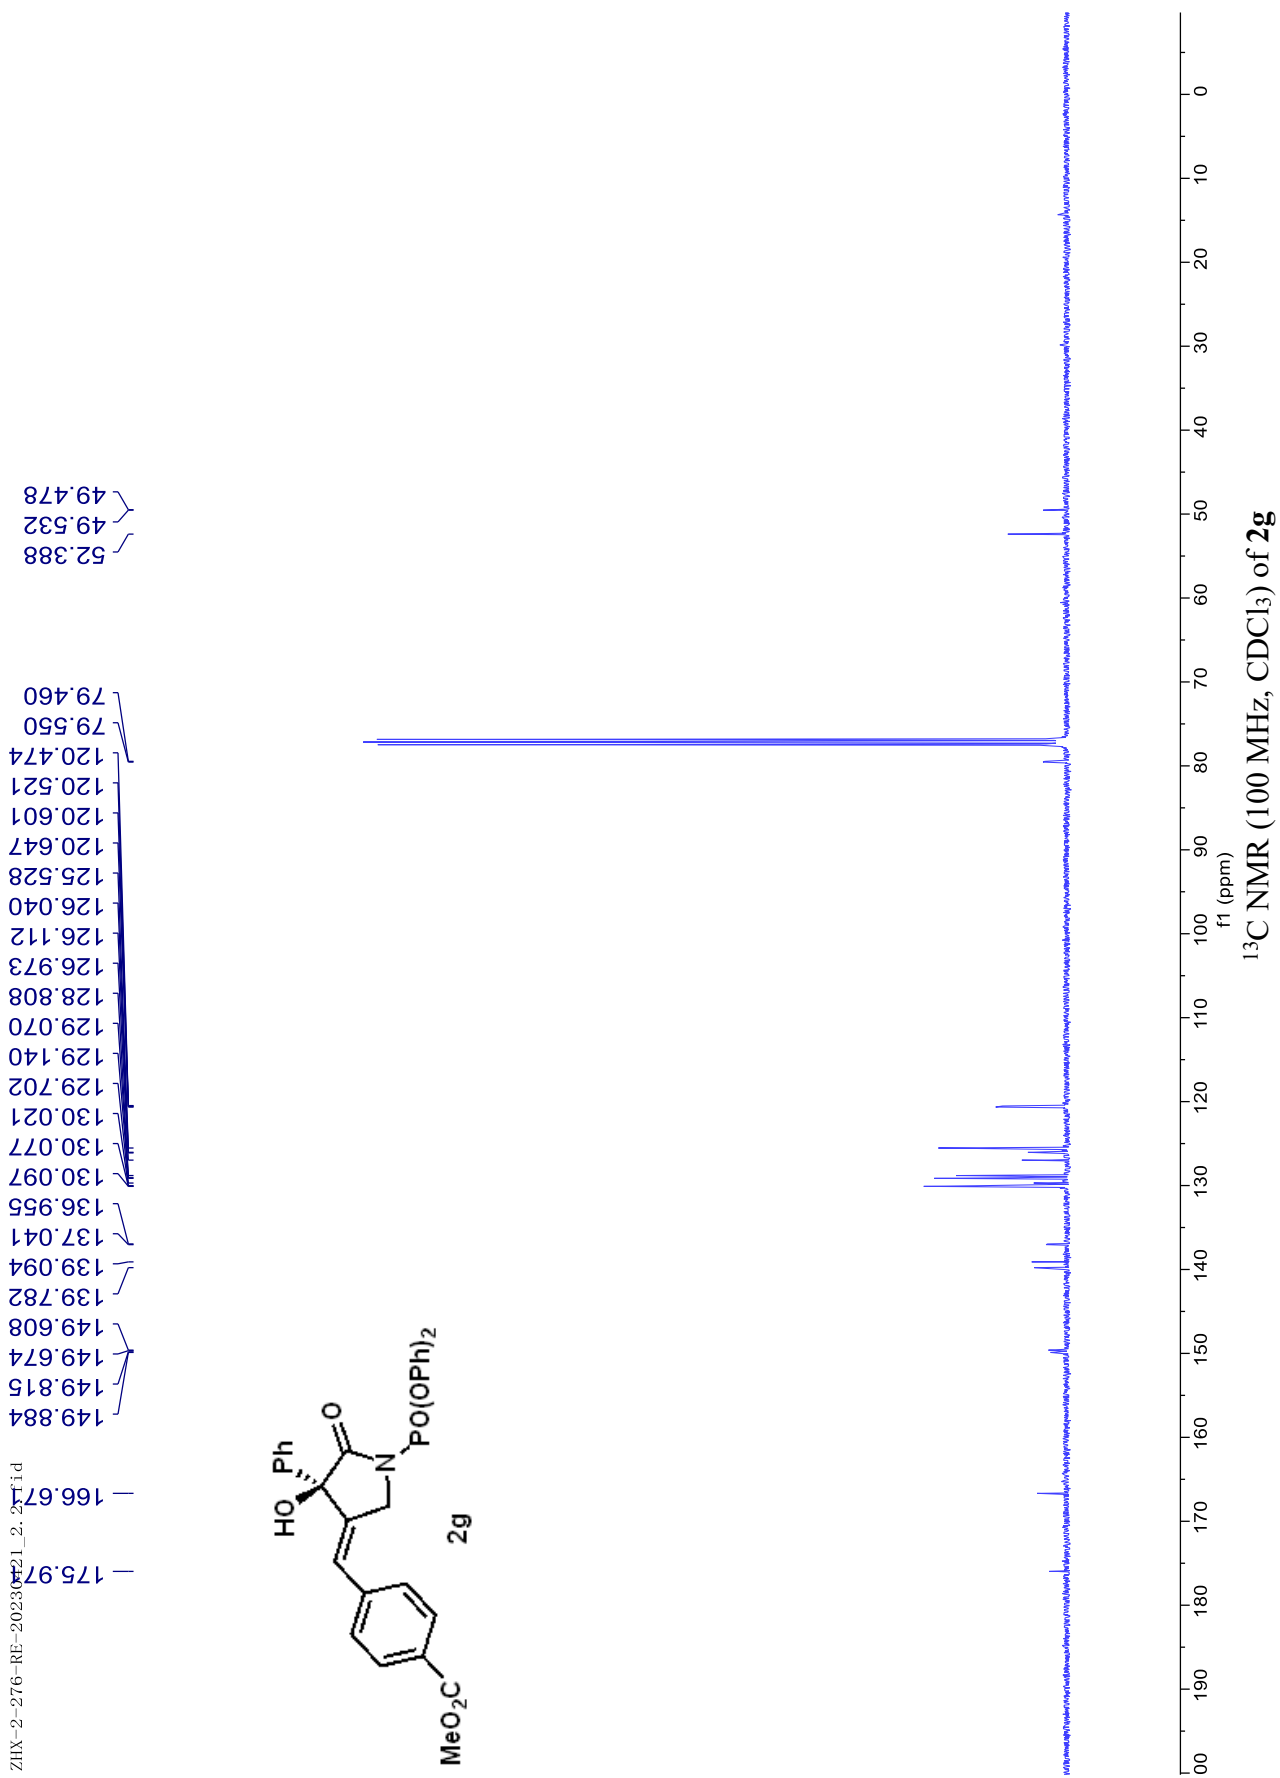



ZHX-2-276-RE-20230421\_2\_3.fid

-12.670

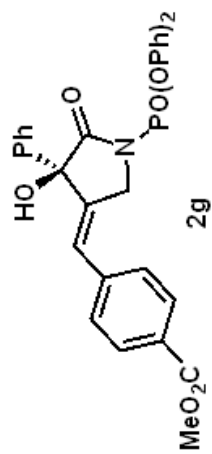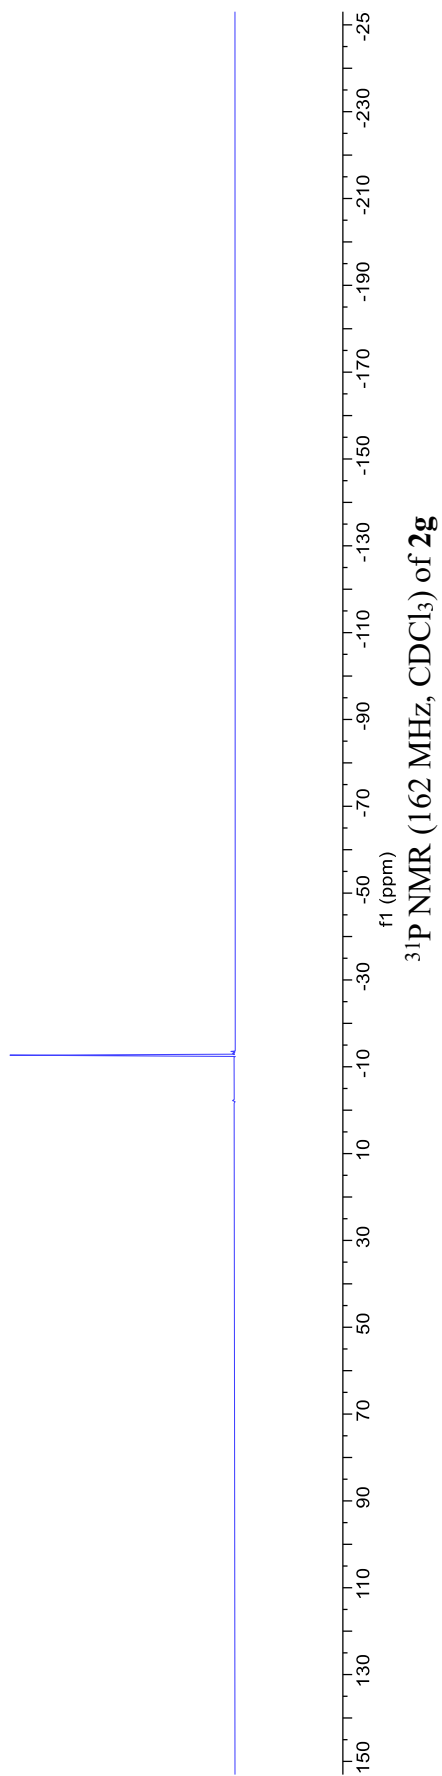

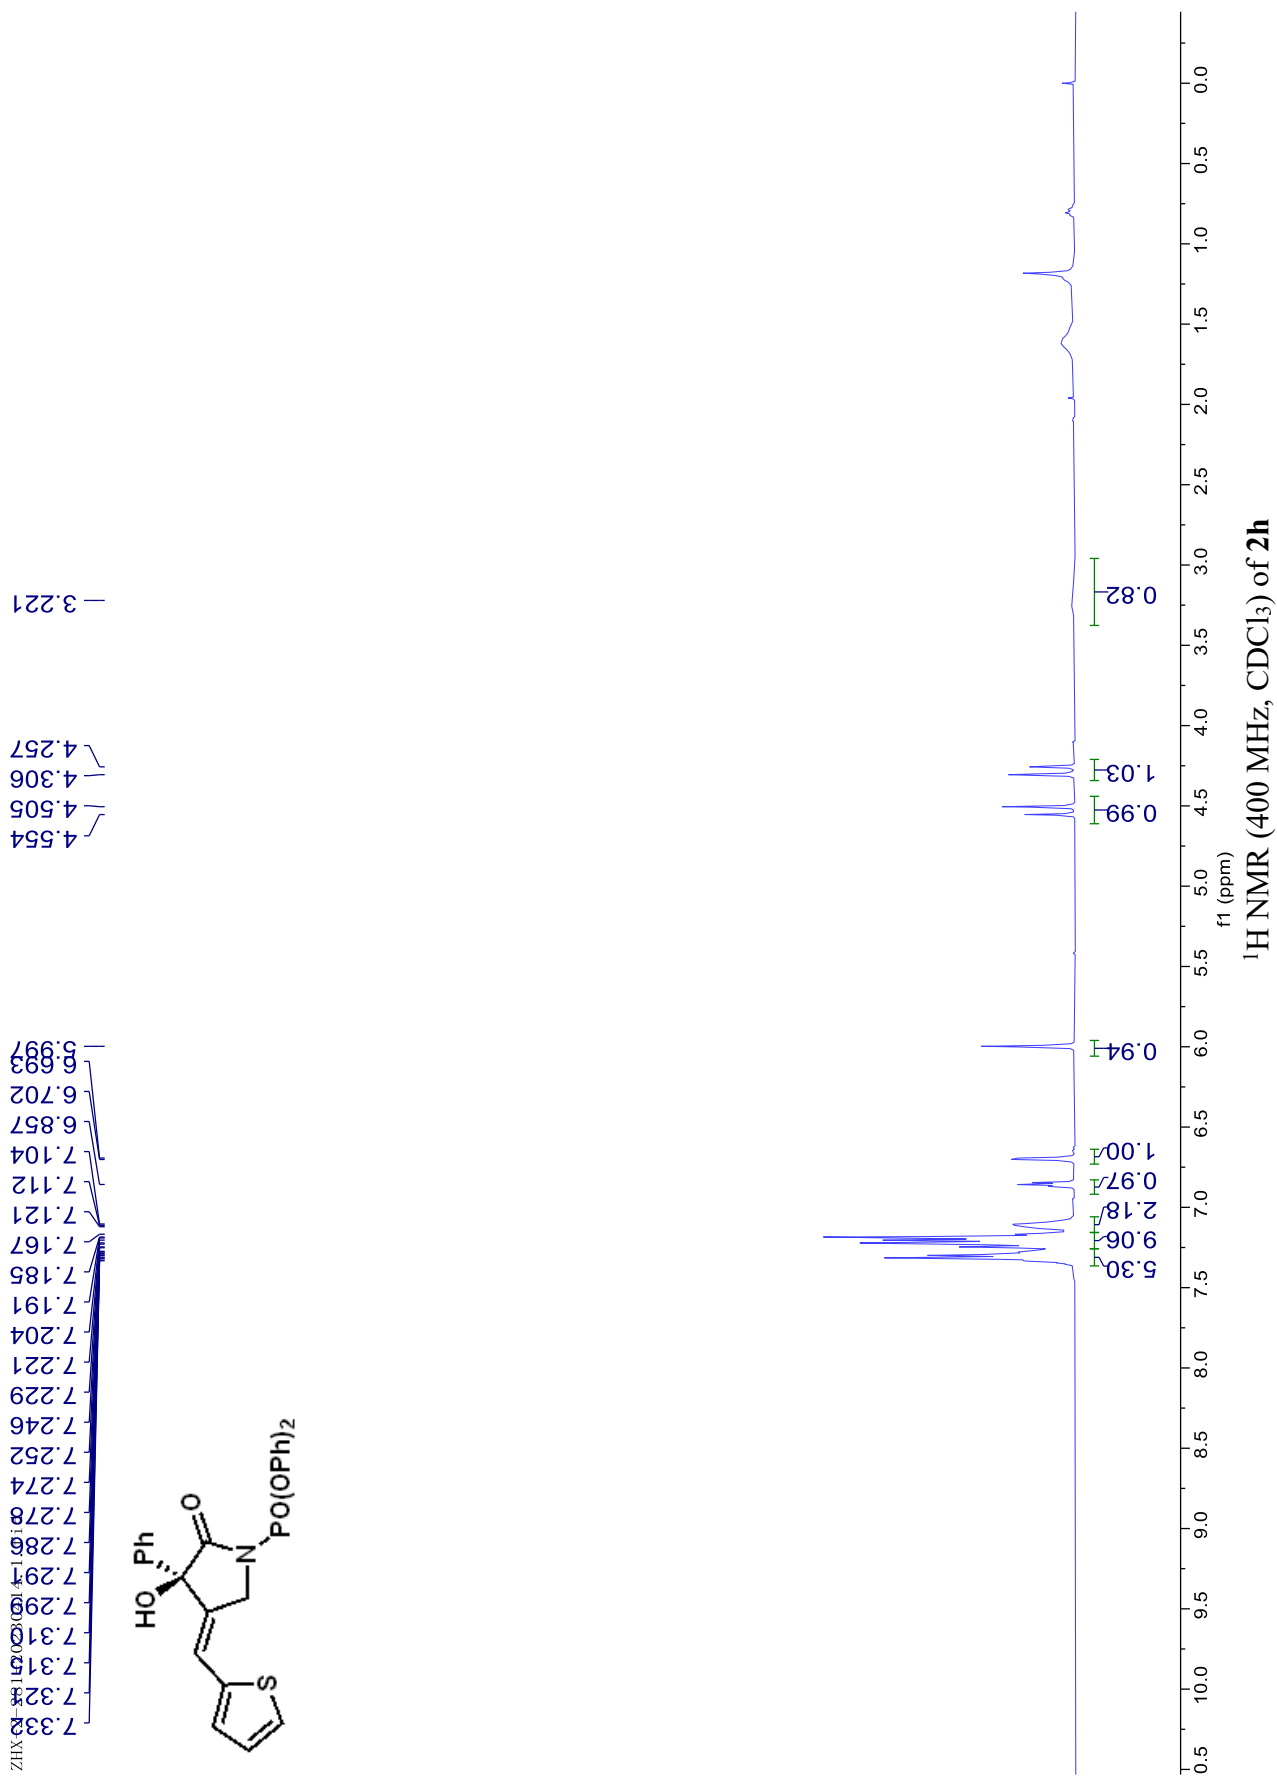

ZHX-2-281-20230414\_2.fid

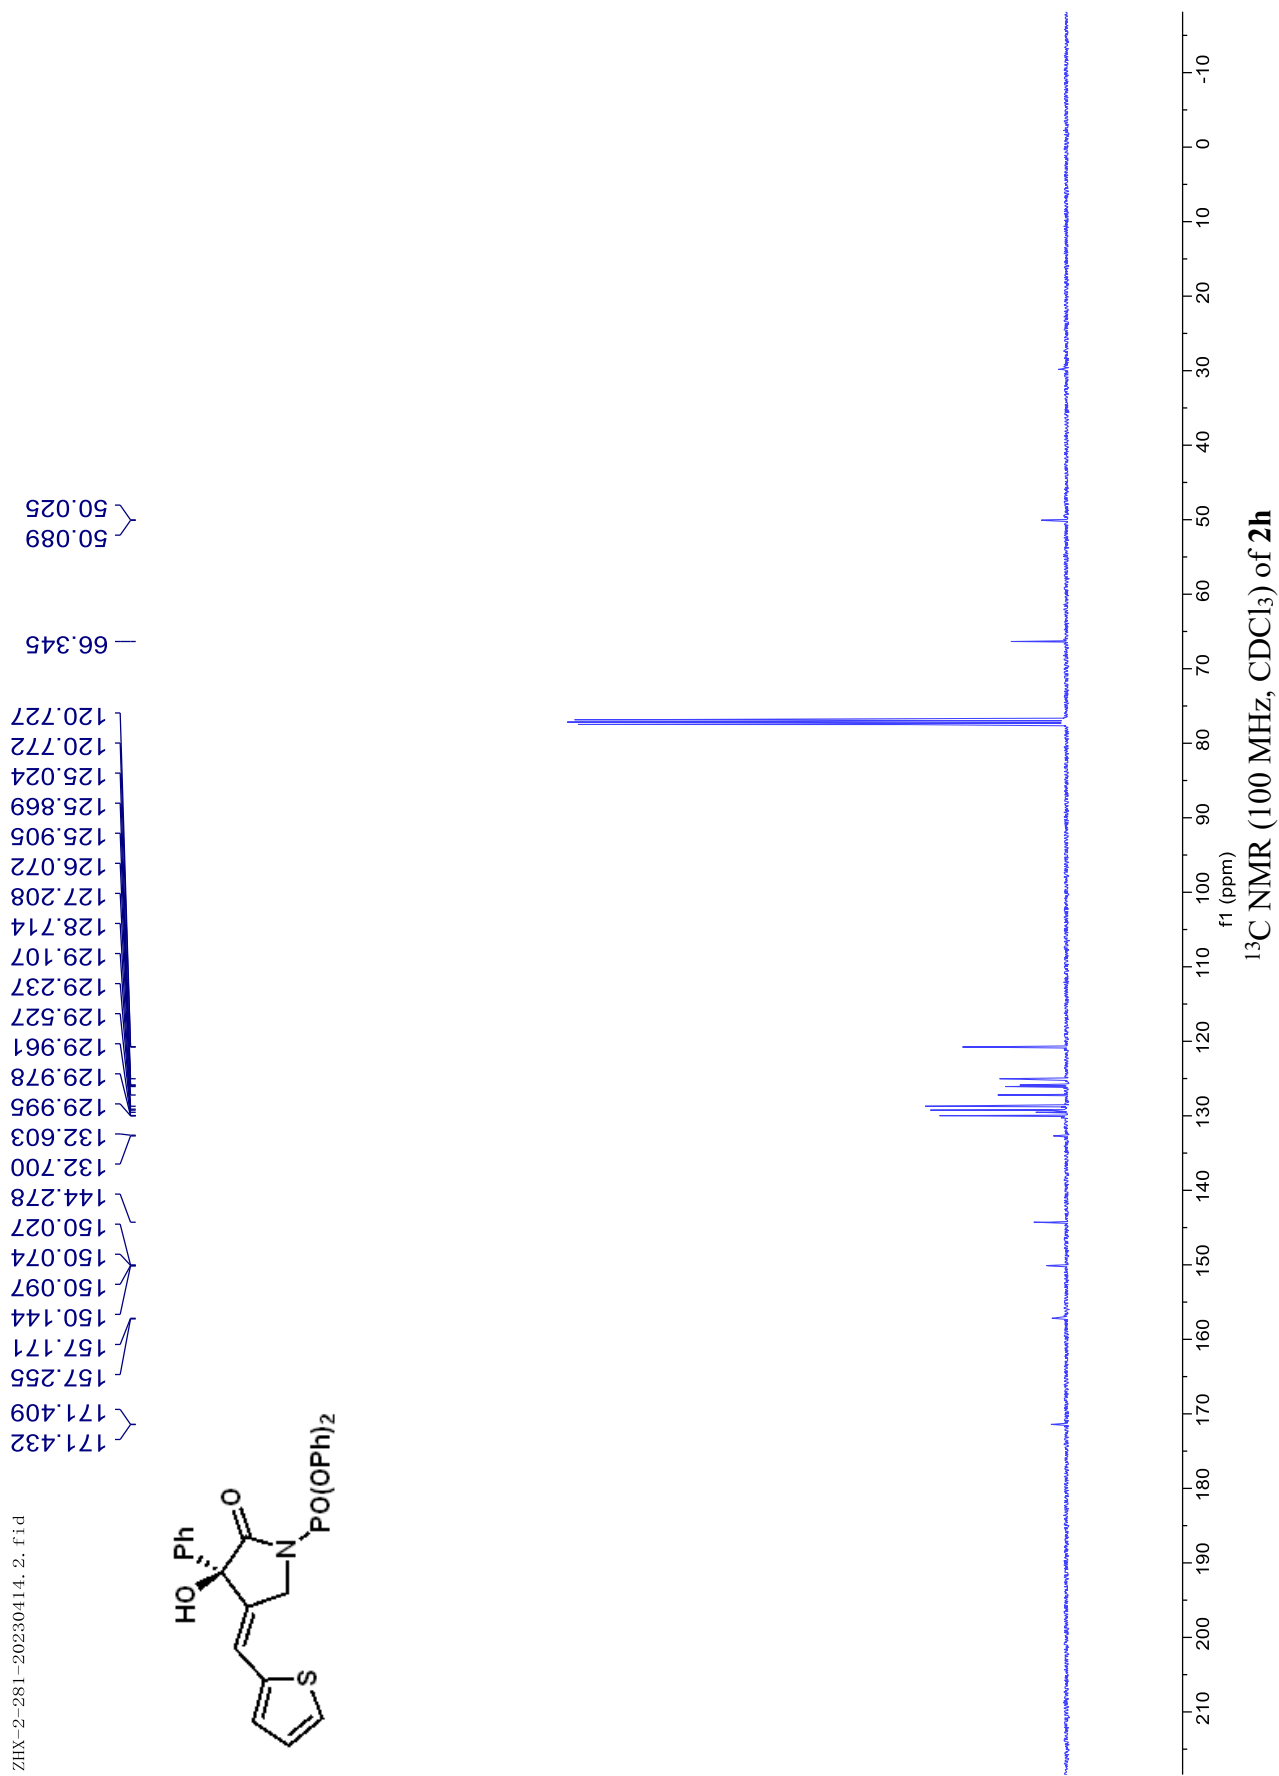

ZHX-2-281-20230414.3.fid

— -11.905

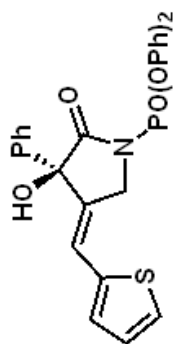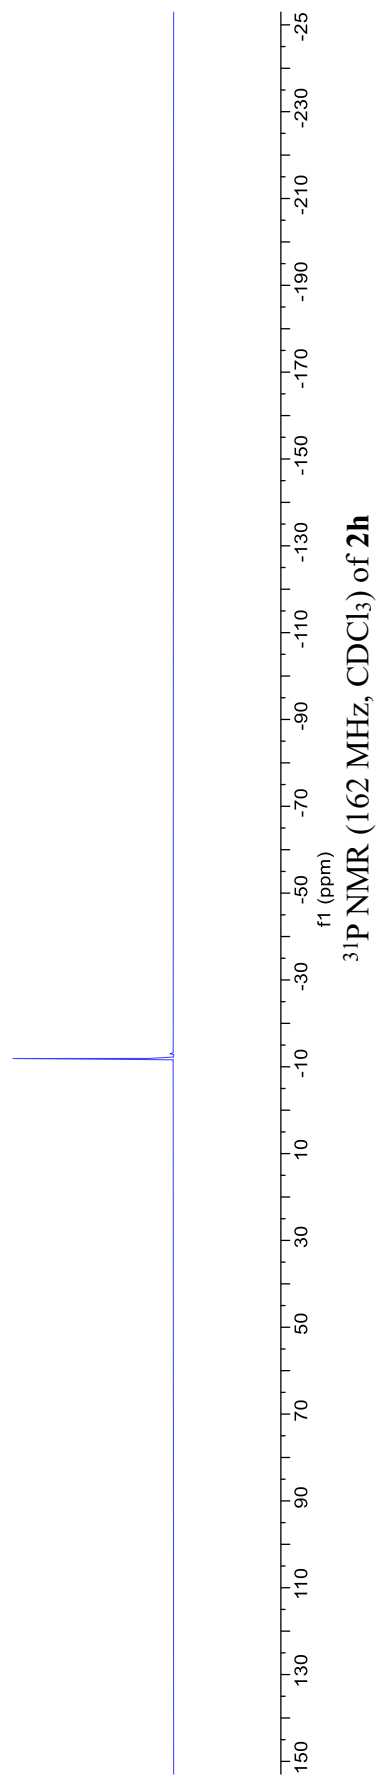

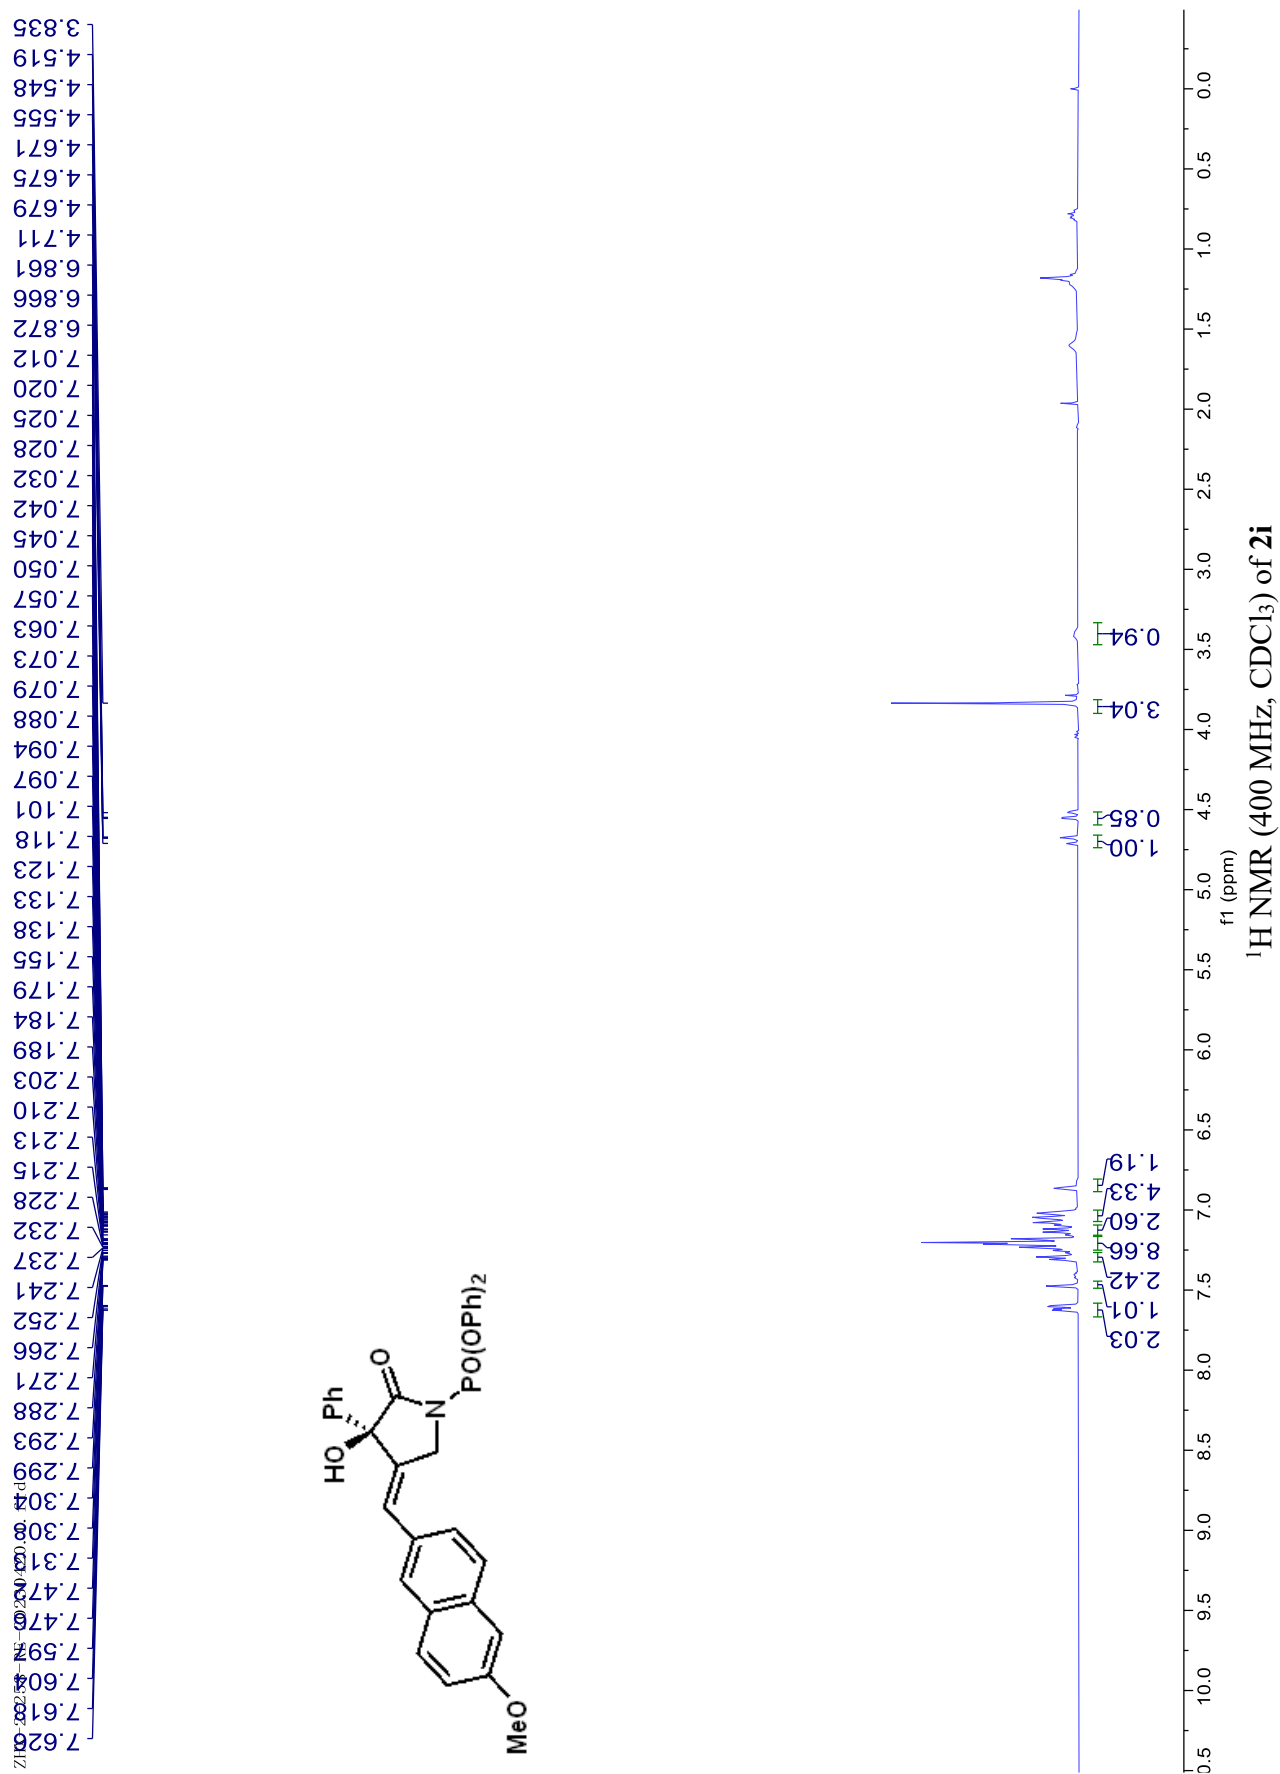

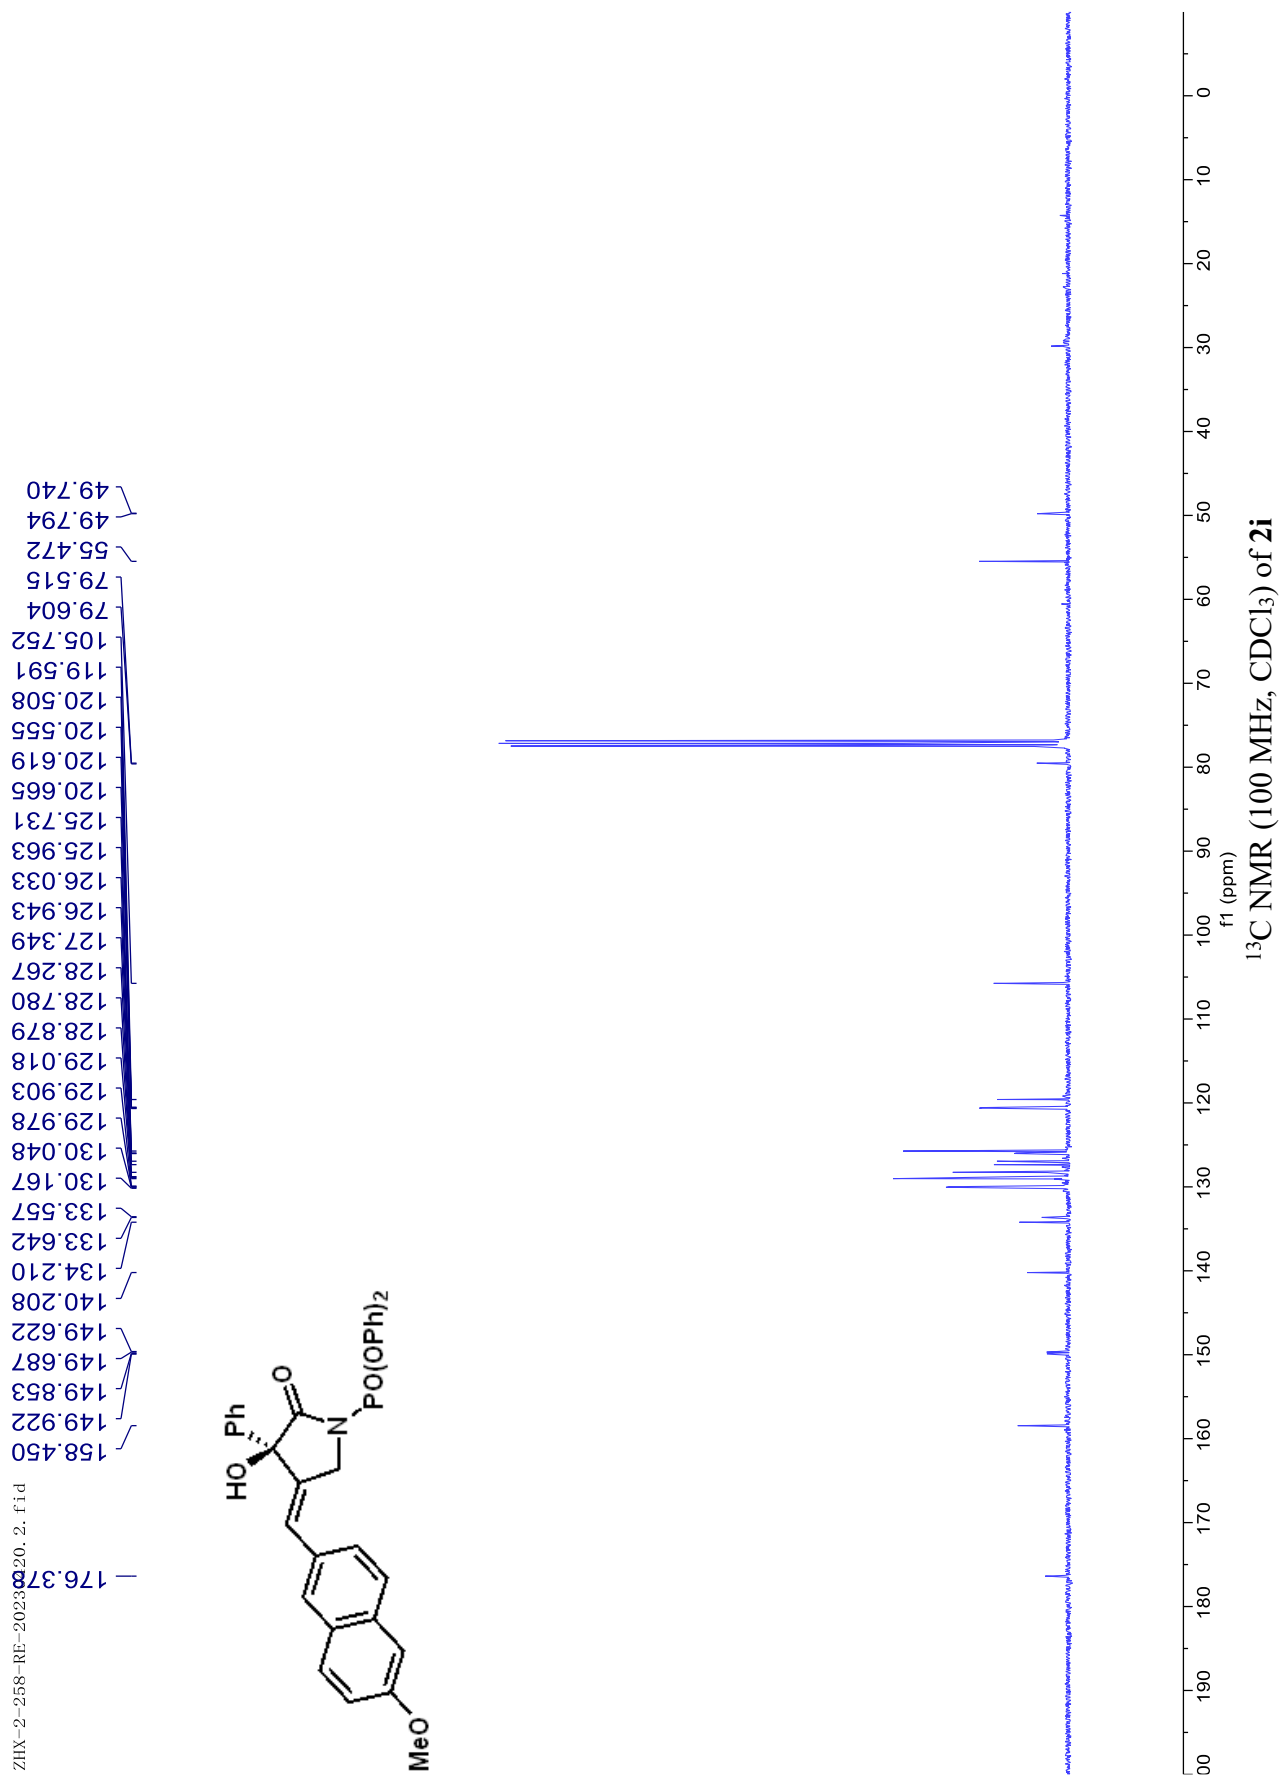

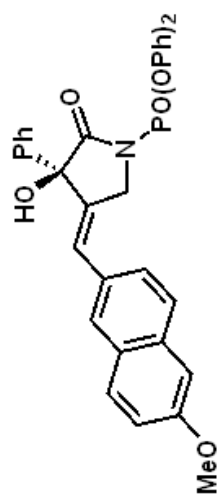

--12.389

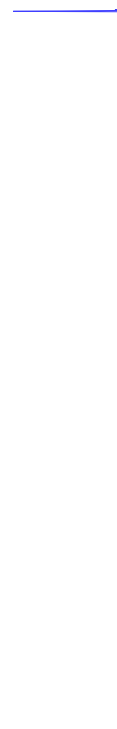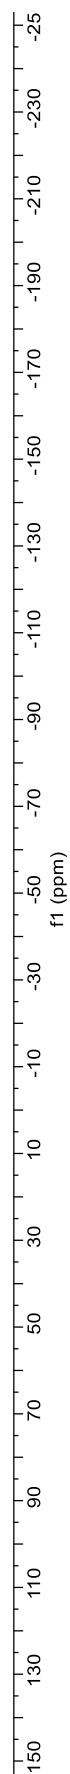

<sup>31</sup>P NMR (162 MHz, CDCl<sub>3</sub>) of **2i**

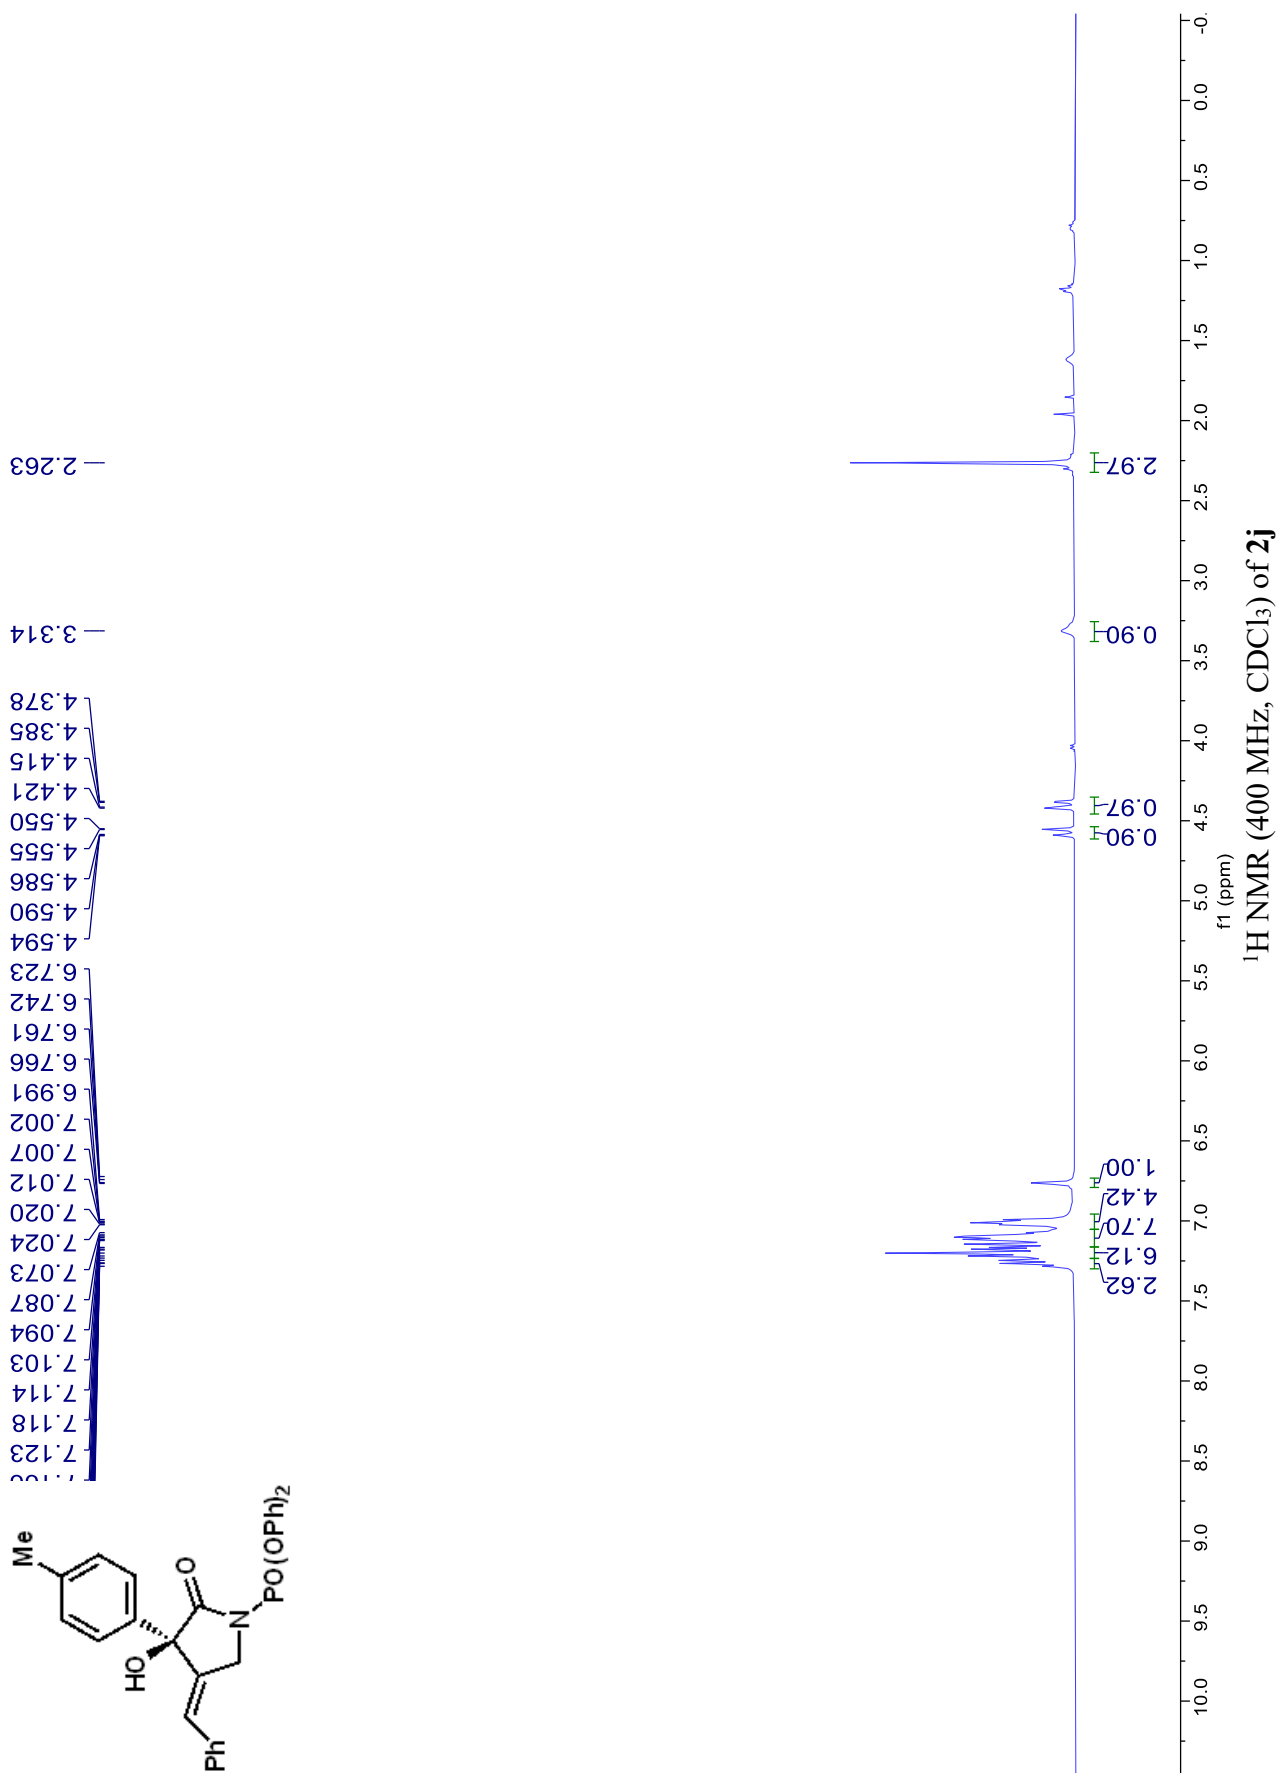



ZHIX-2-208-CH-P1. 3. f1.d

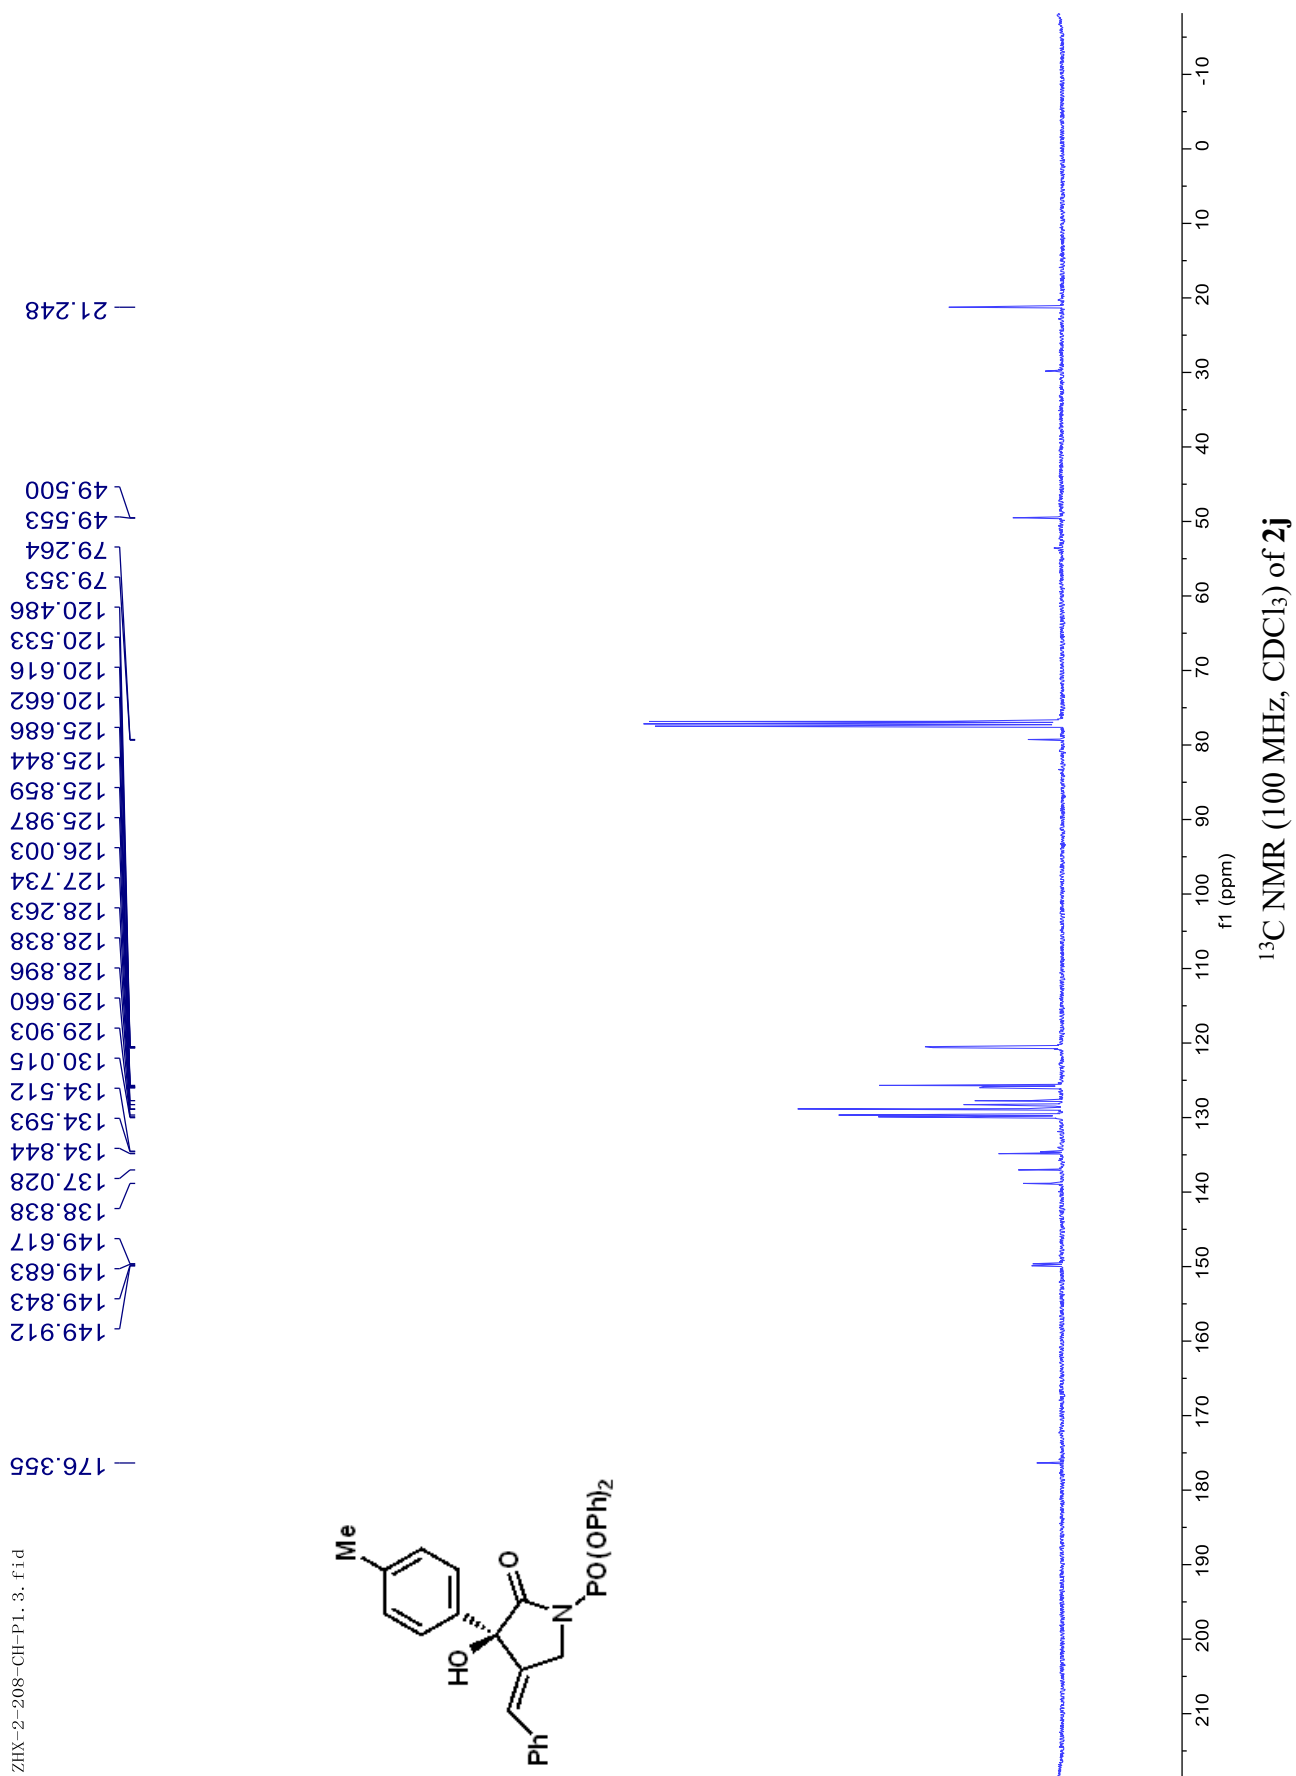

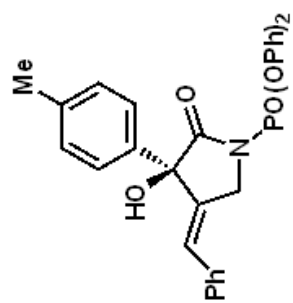

--12.420

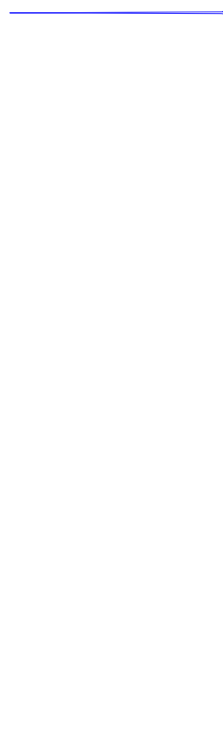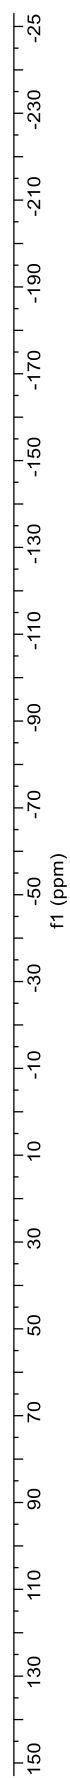

<sup>31</sup>P NMR (162 MHz, CDCl<sub>3</sub>) of **2j**

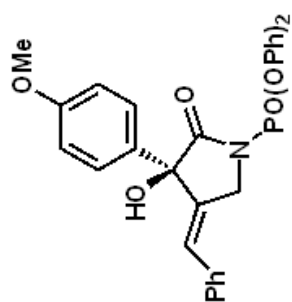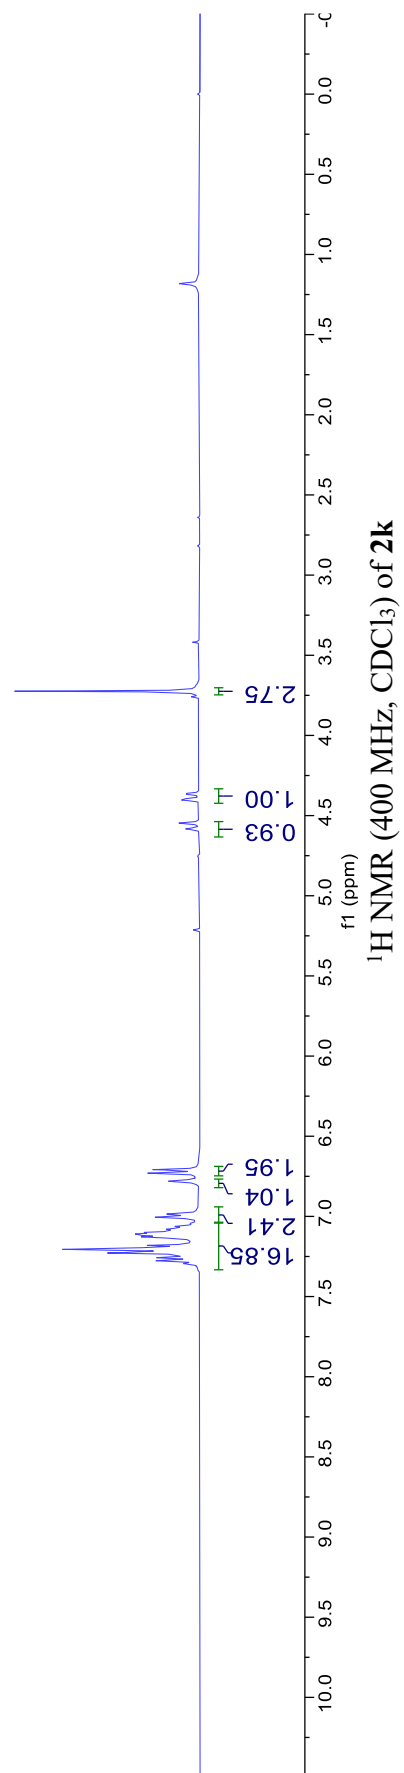

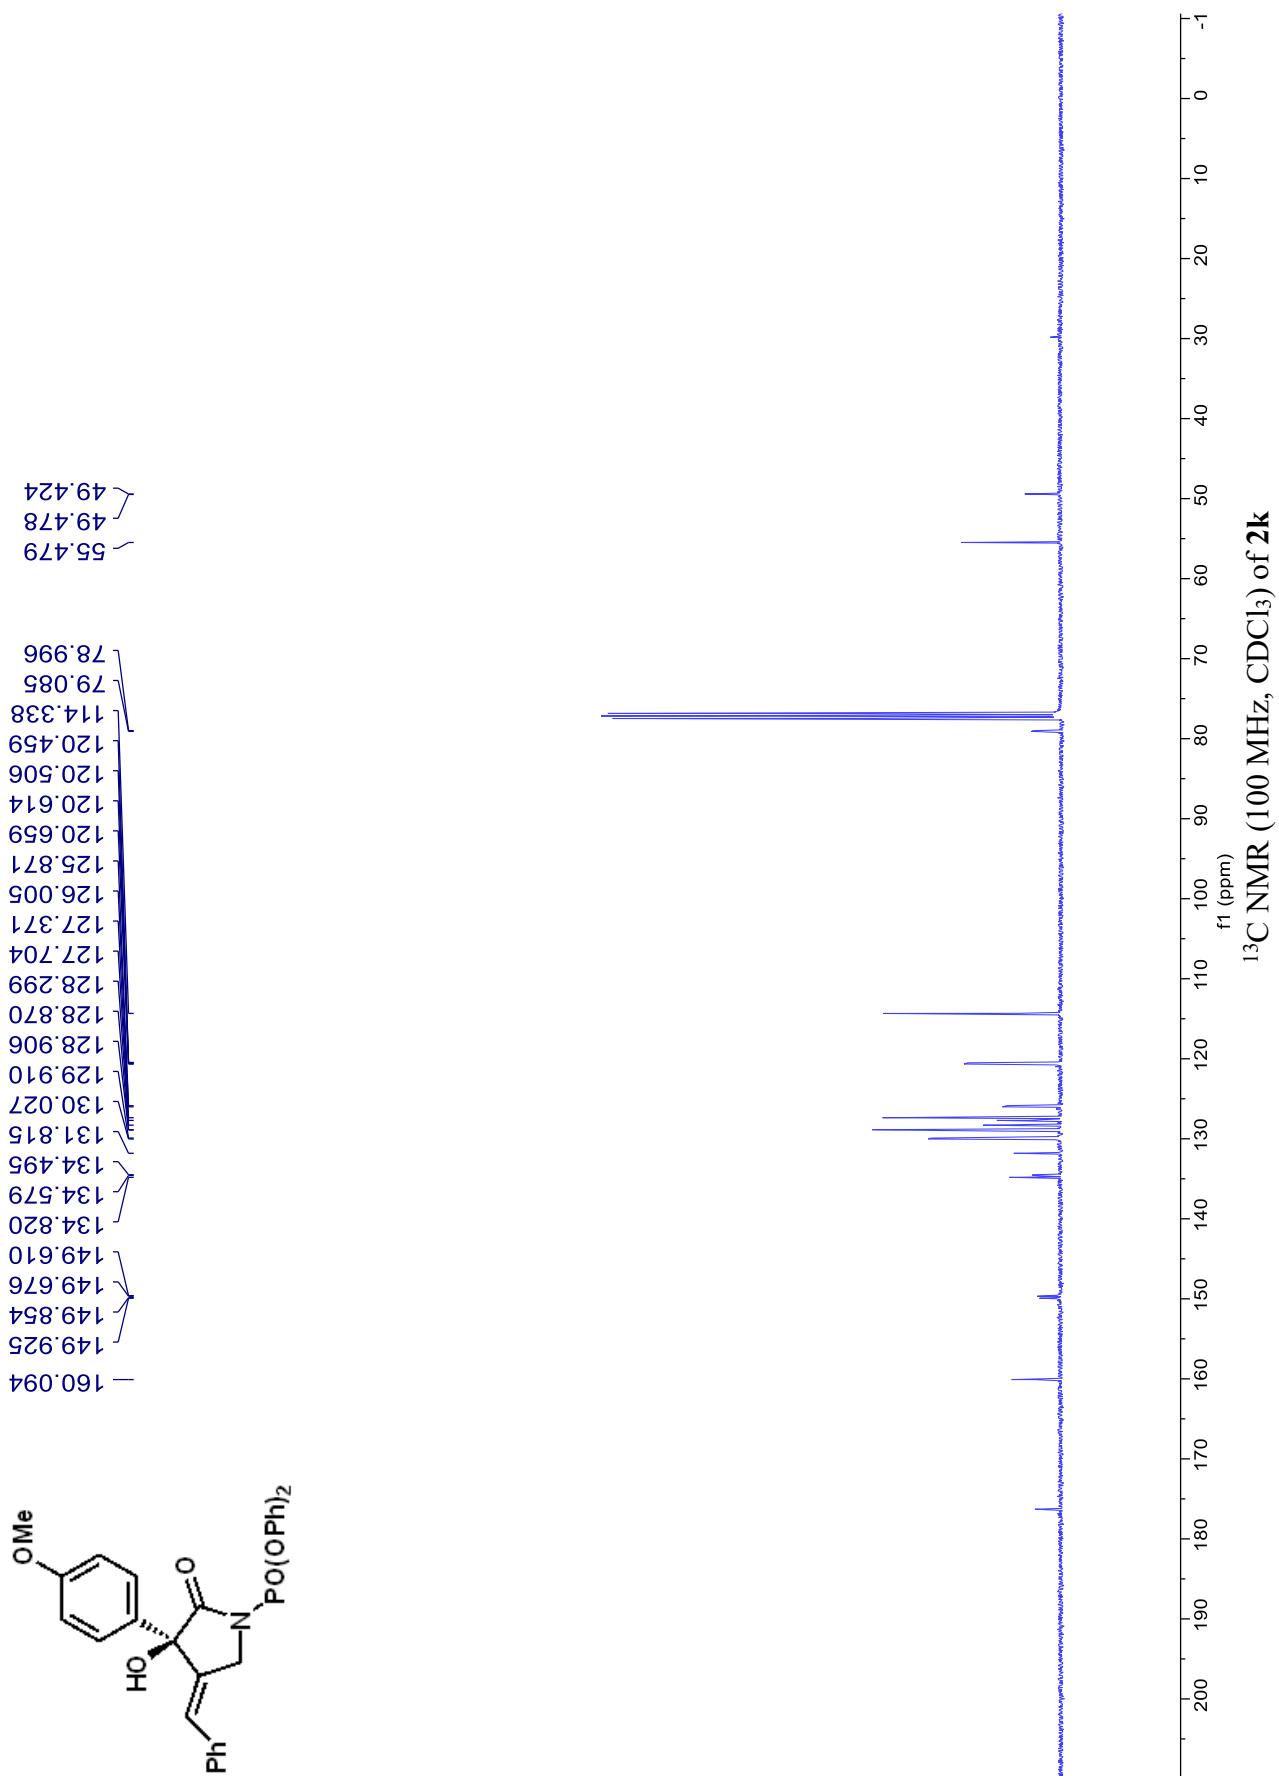

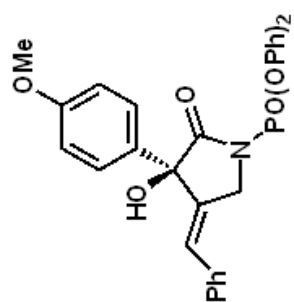

--12.383

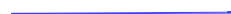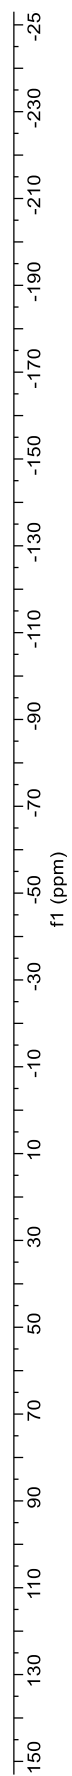

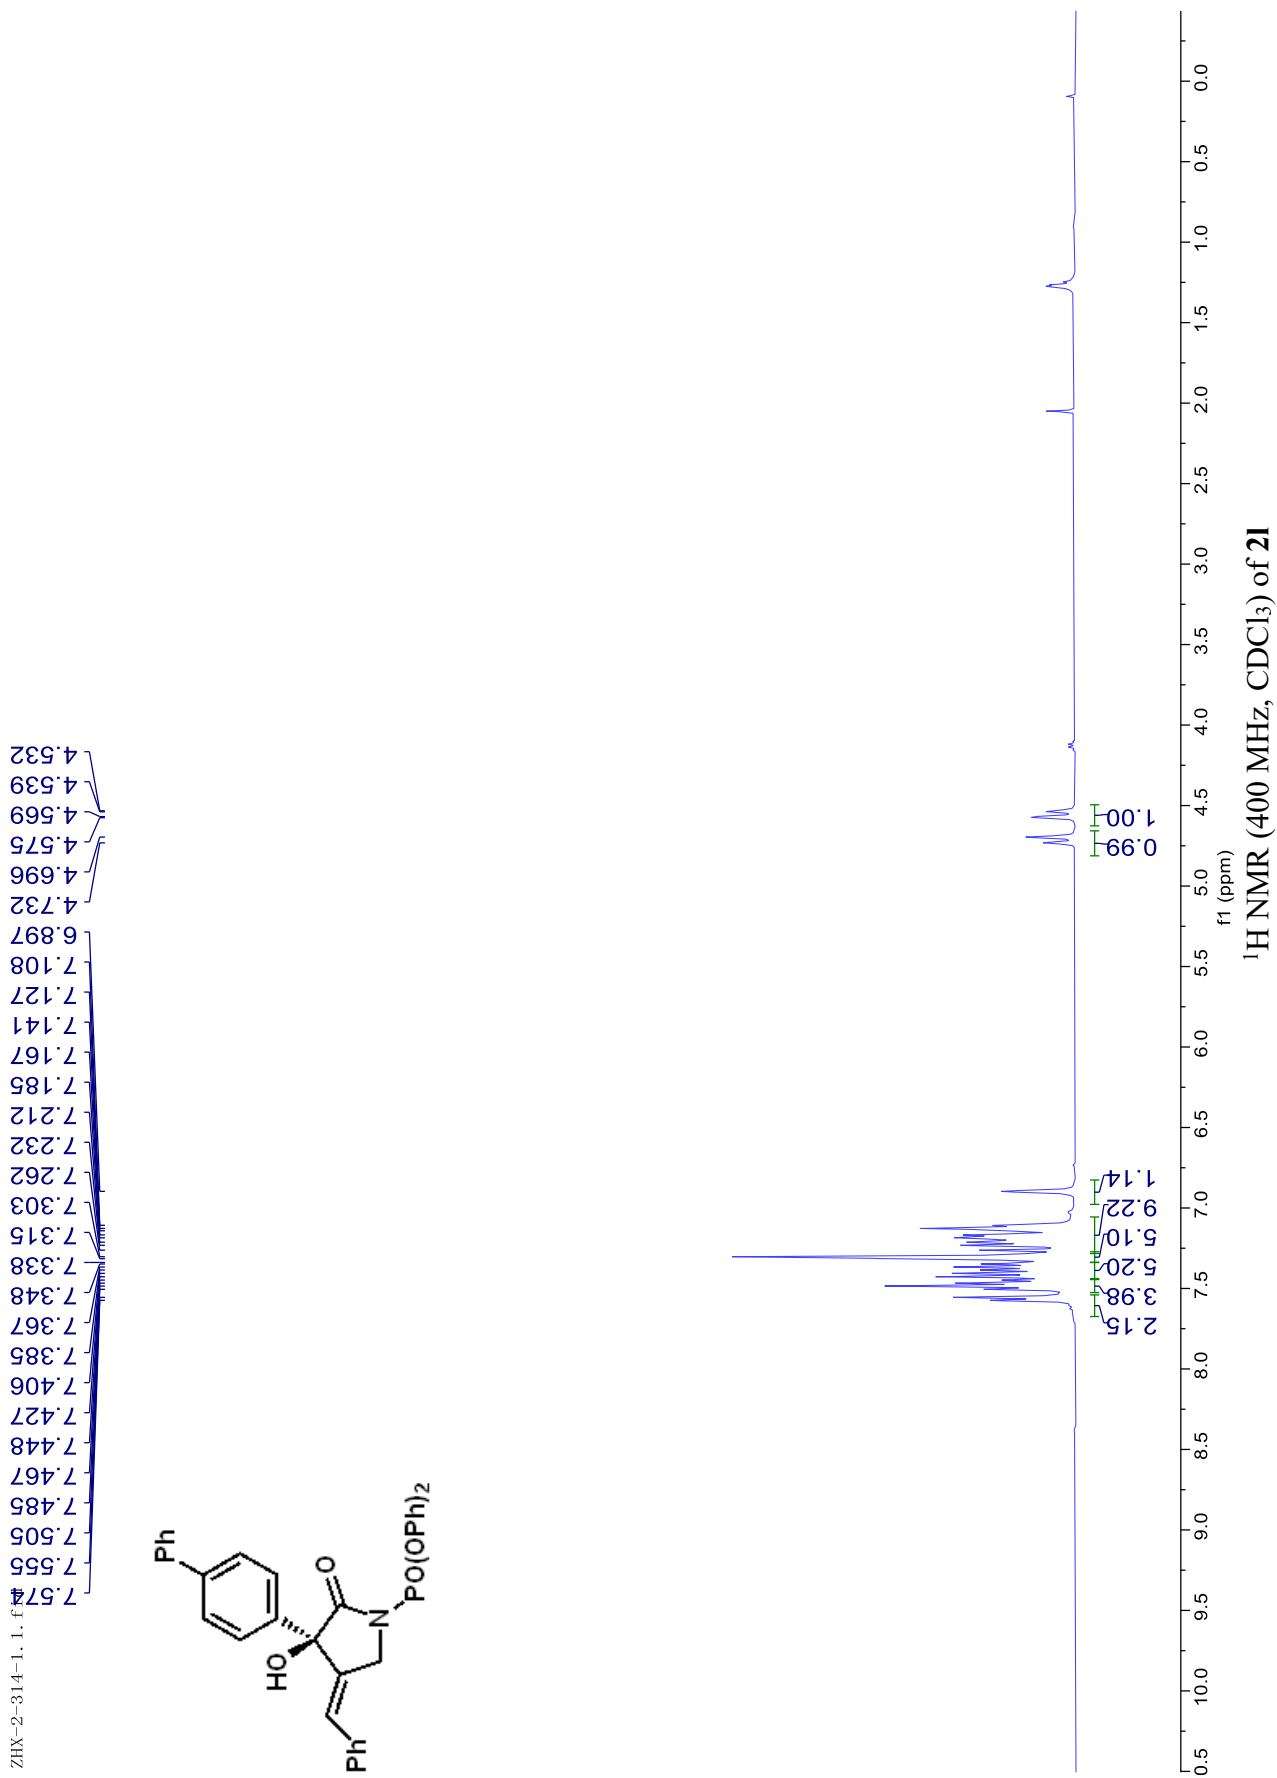

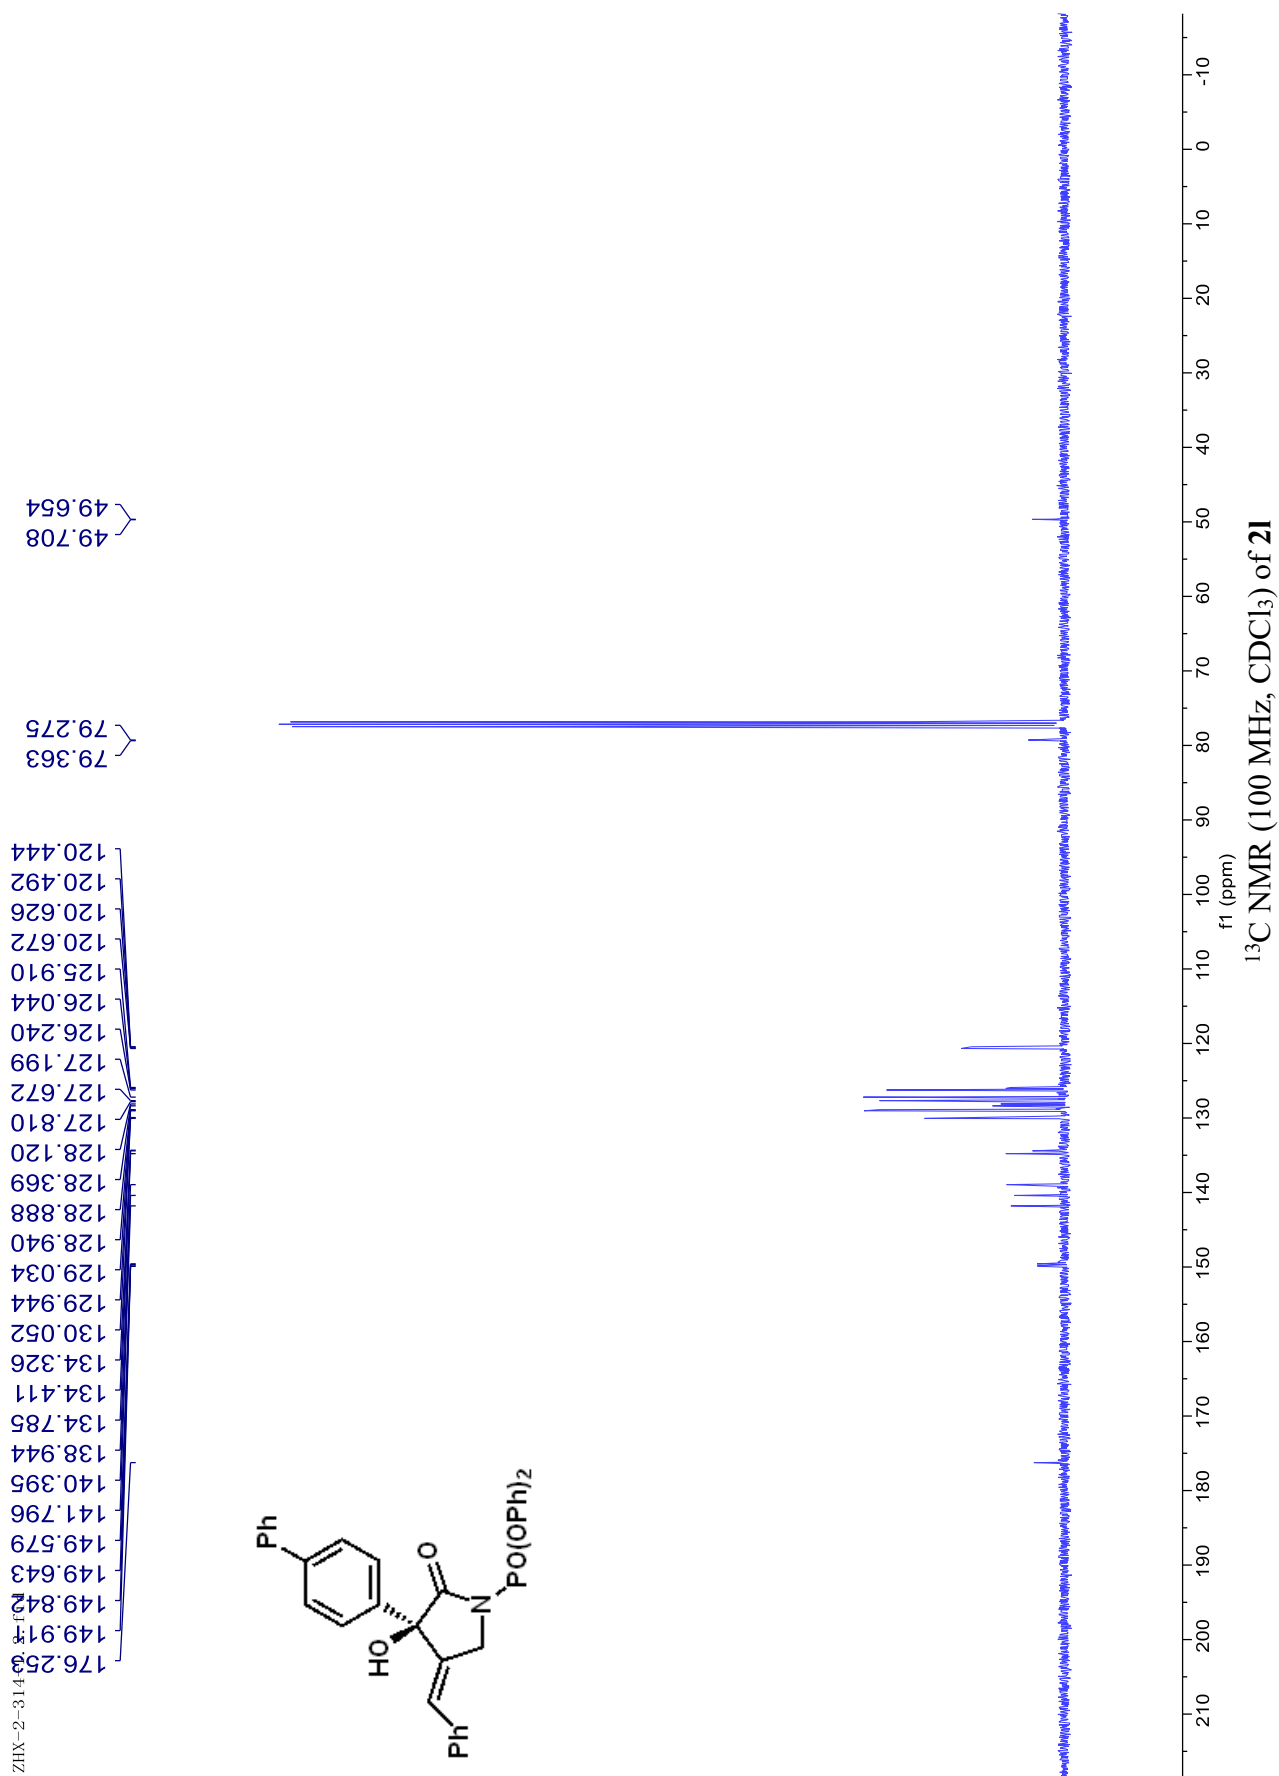

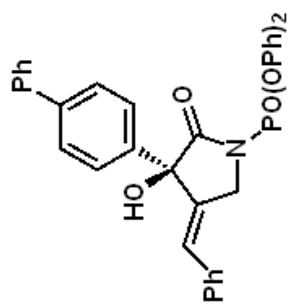

--12.463

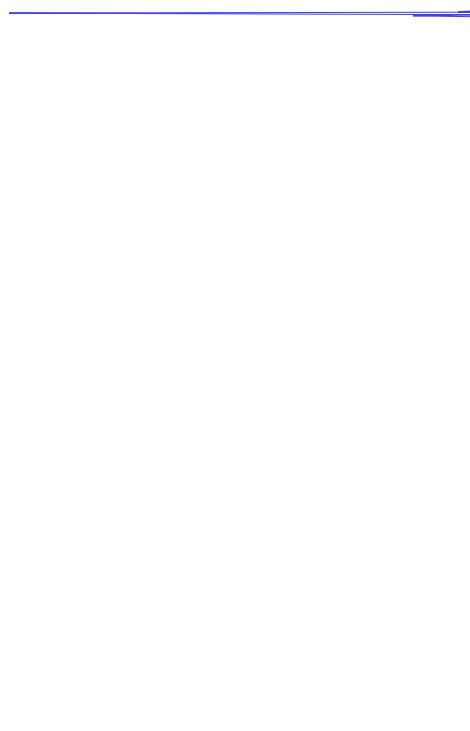

150 130 110 90 70 50 30 10 -10 -30 -50 -70 -90 -110 -130 -150 -170 -190 -210 -230 -25  
f1 (ppm)

<sup>31</sup>P NMR (162 MHz, CDCl<sub>3</sub>) of **21**



ZHX-2-306-1-P. 1. fid

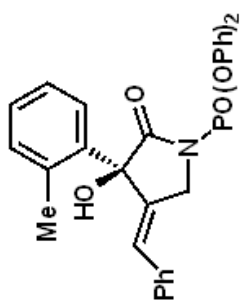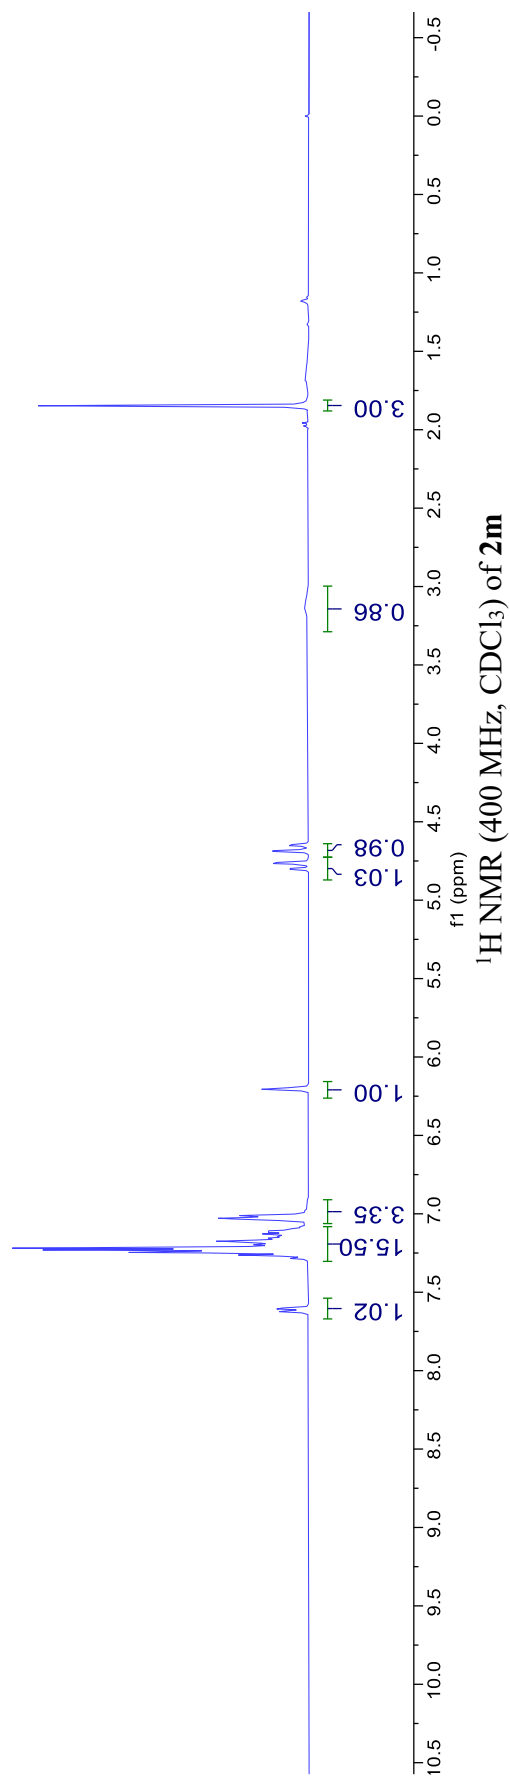



ZHX-2-306-2.1.f1d

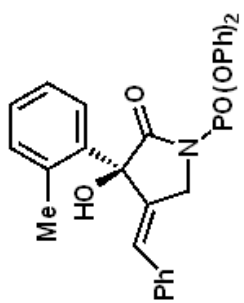

--12.225

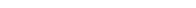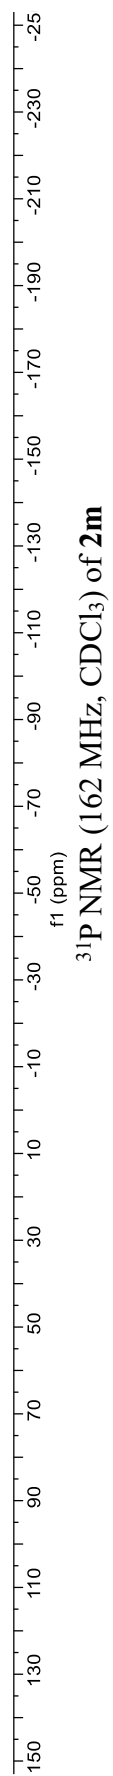

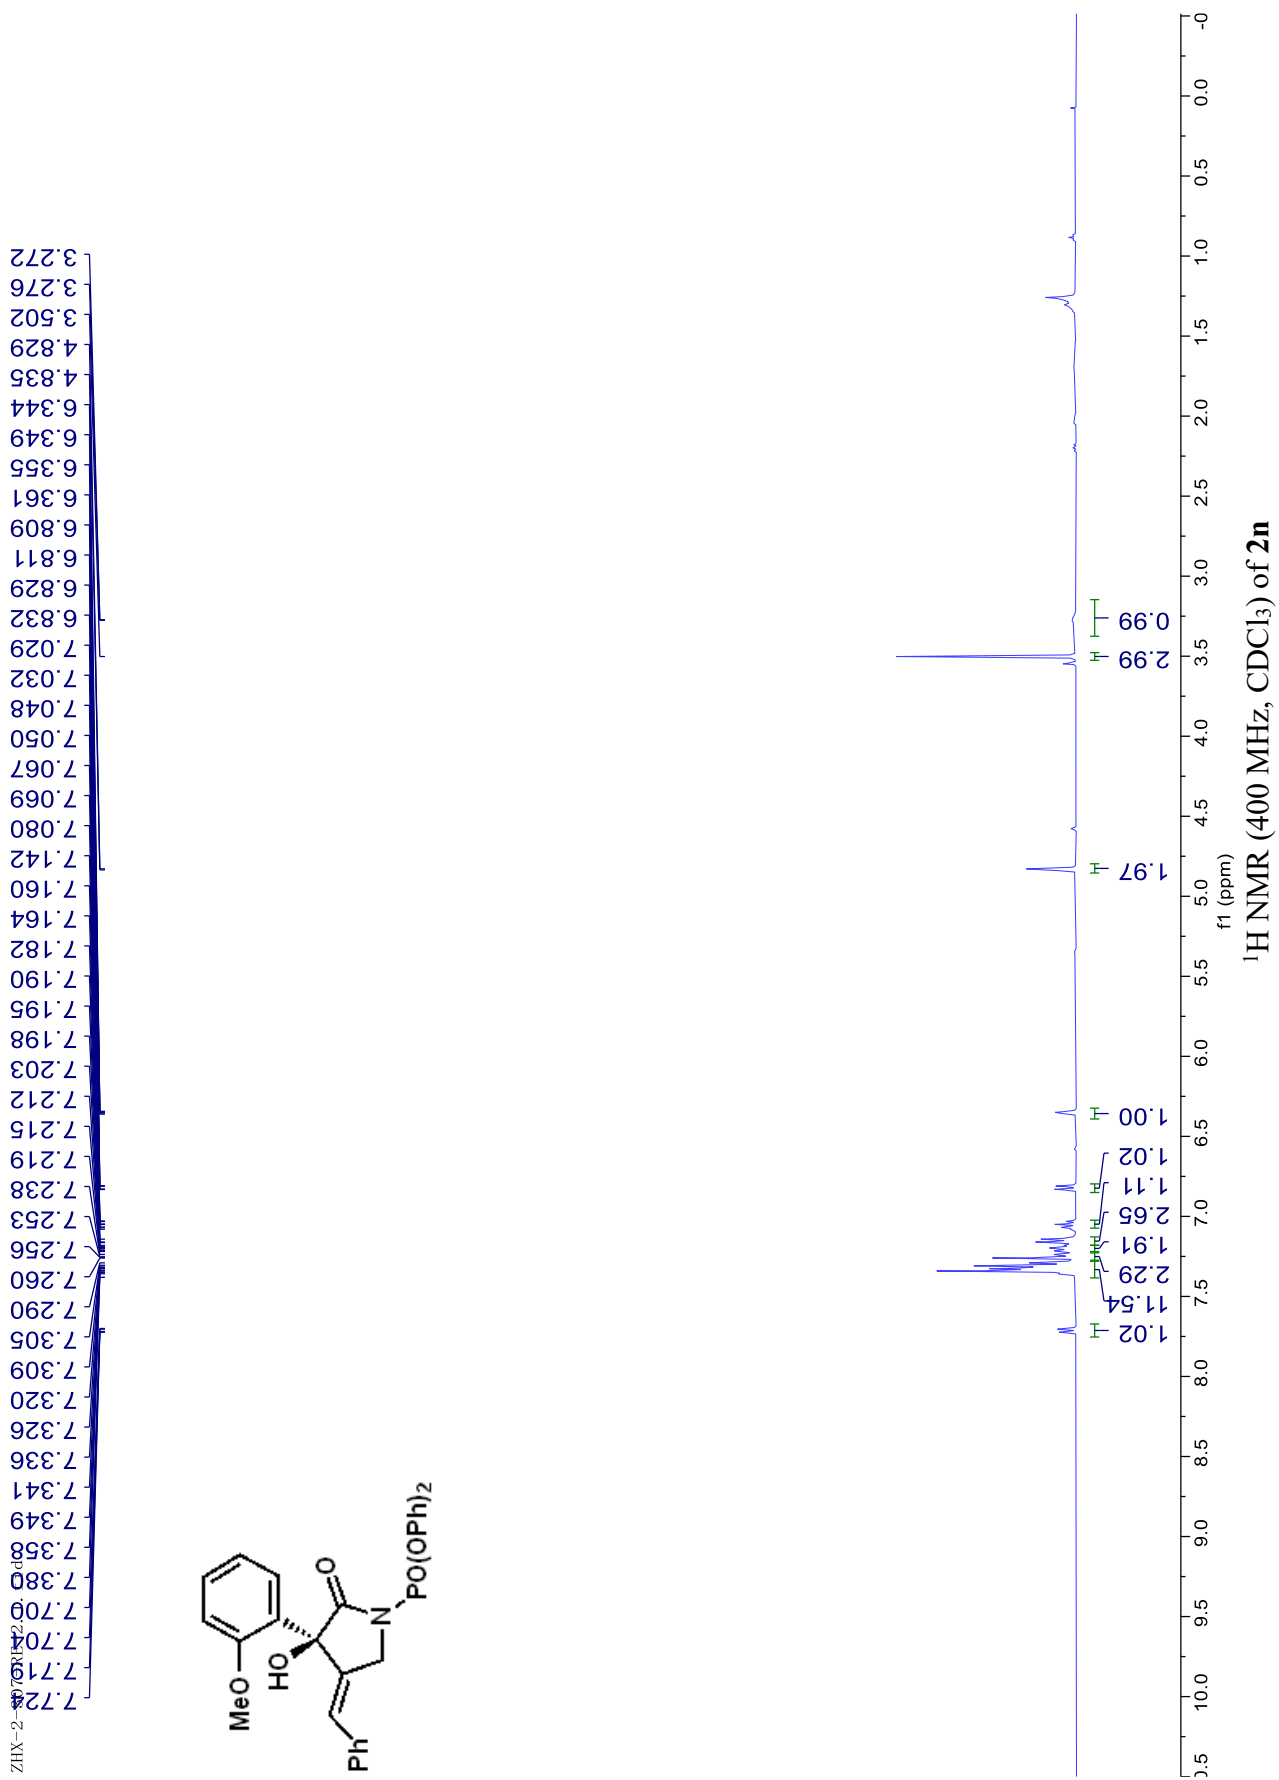

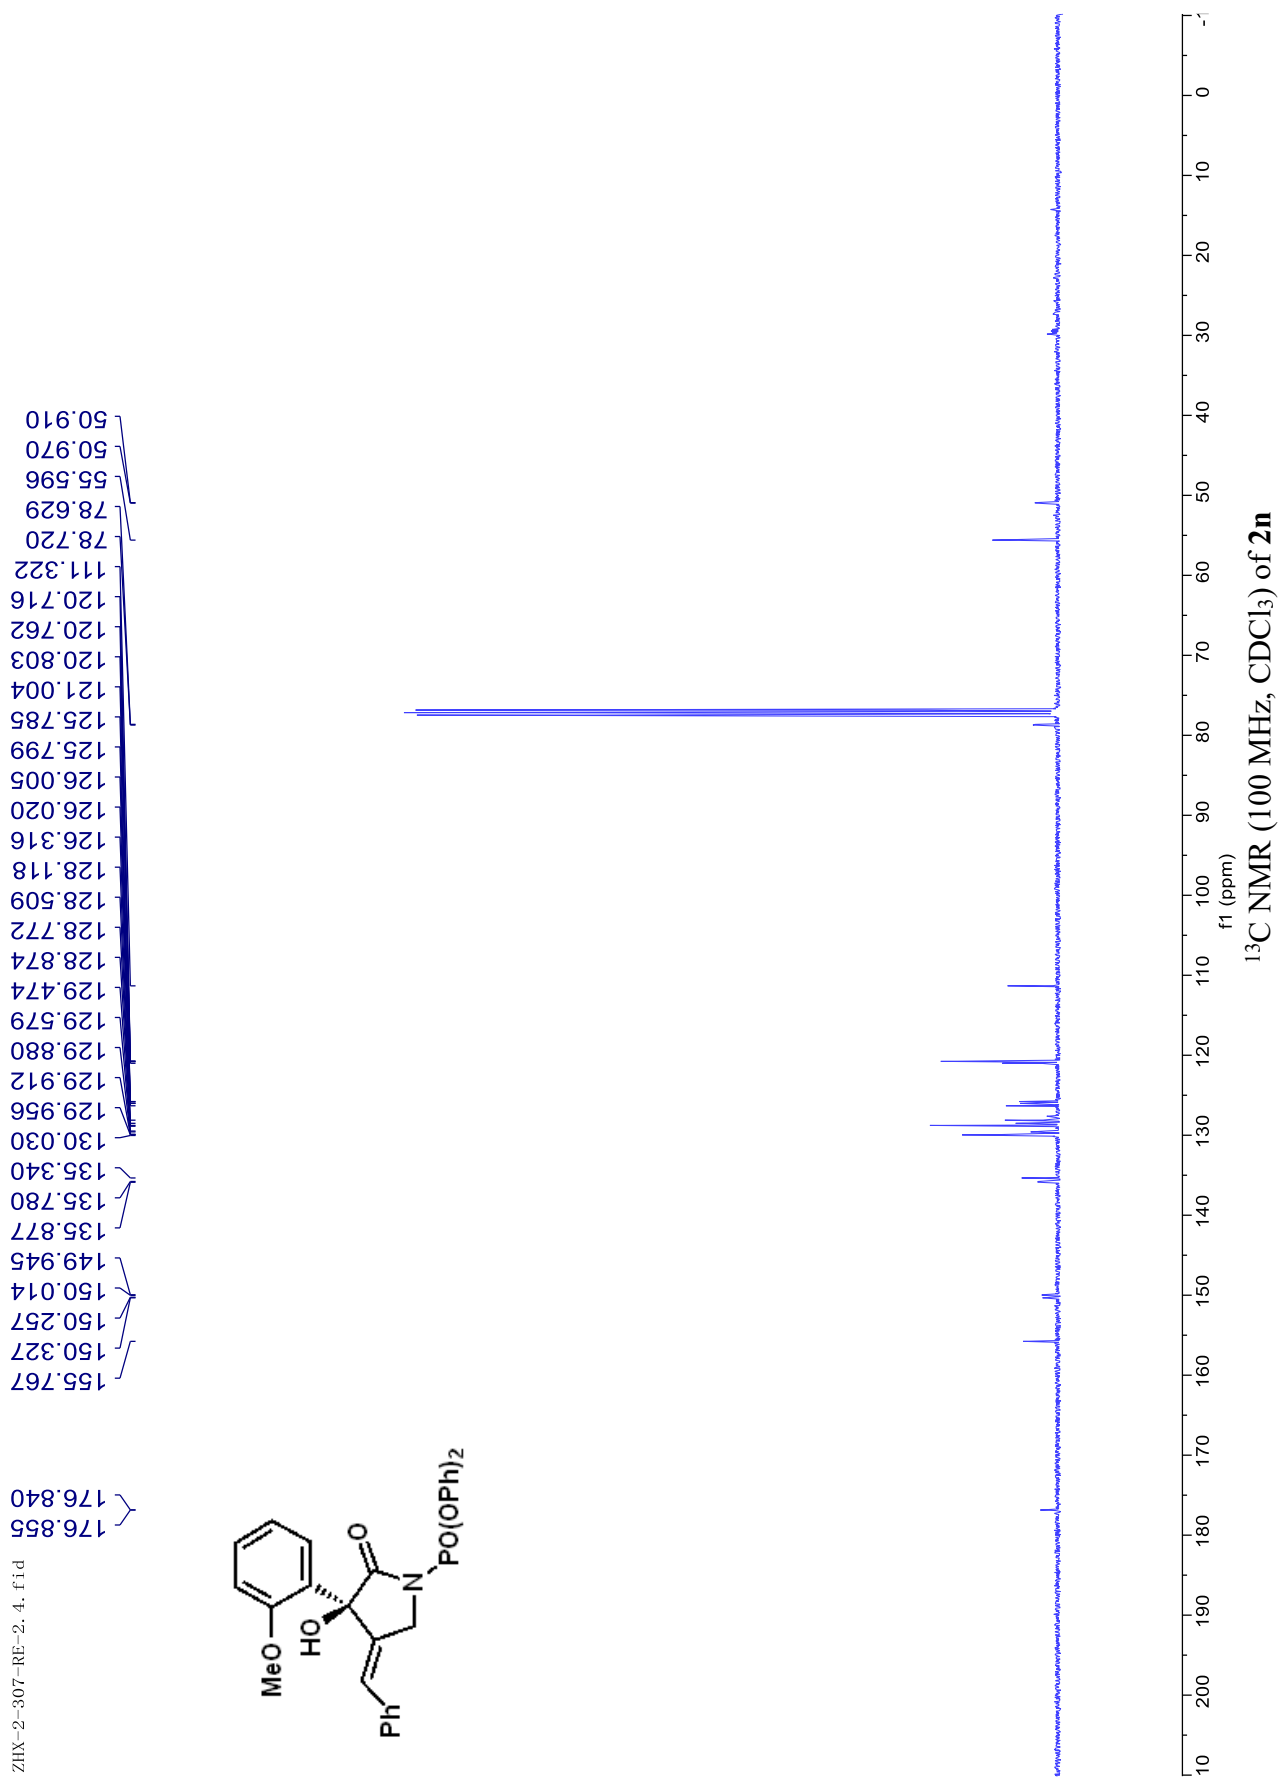

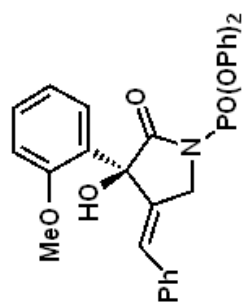

--11.913

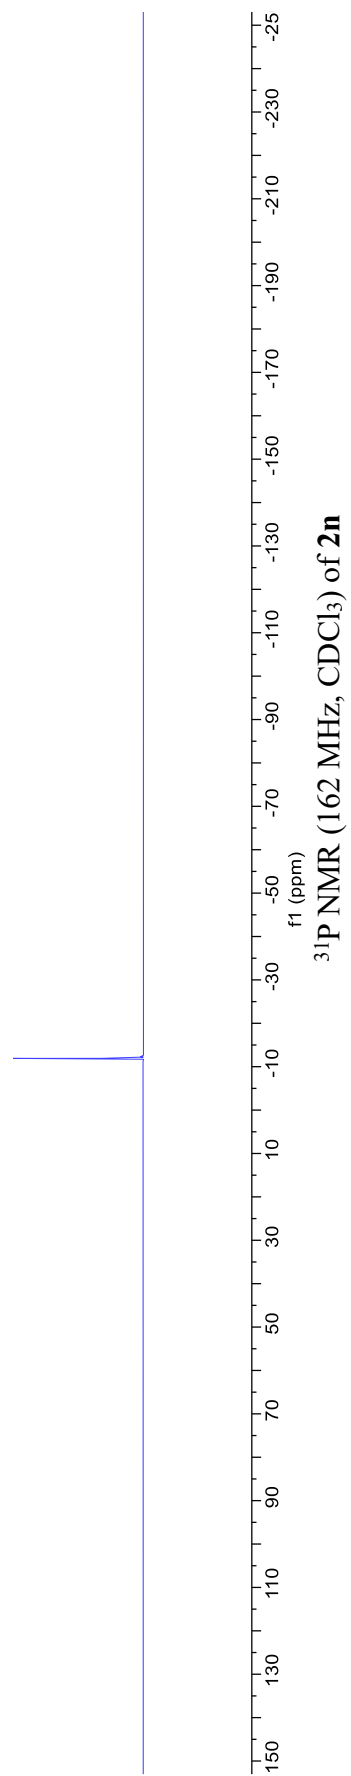

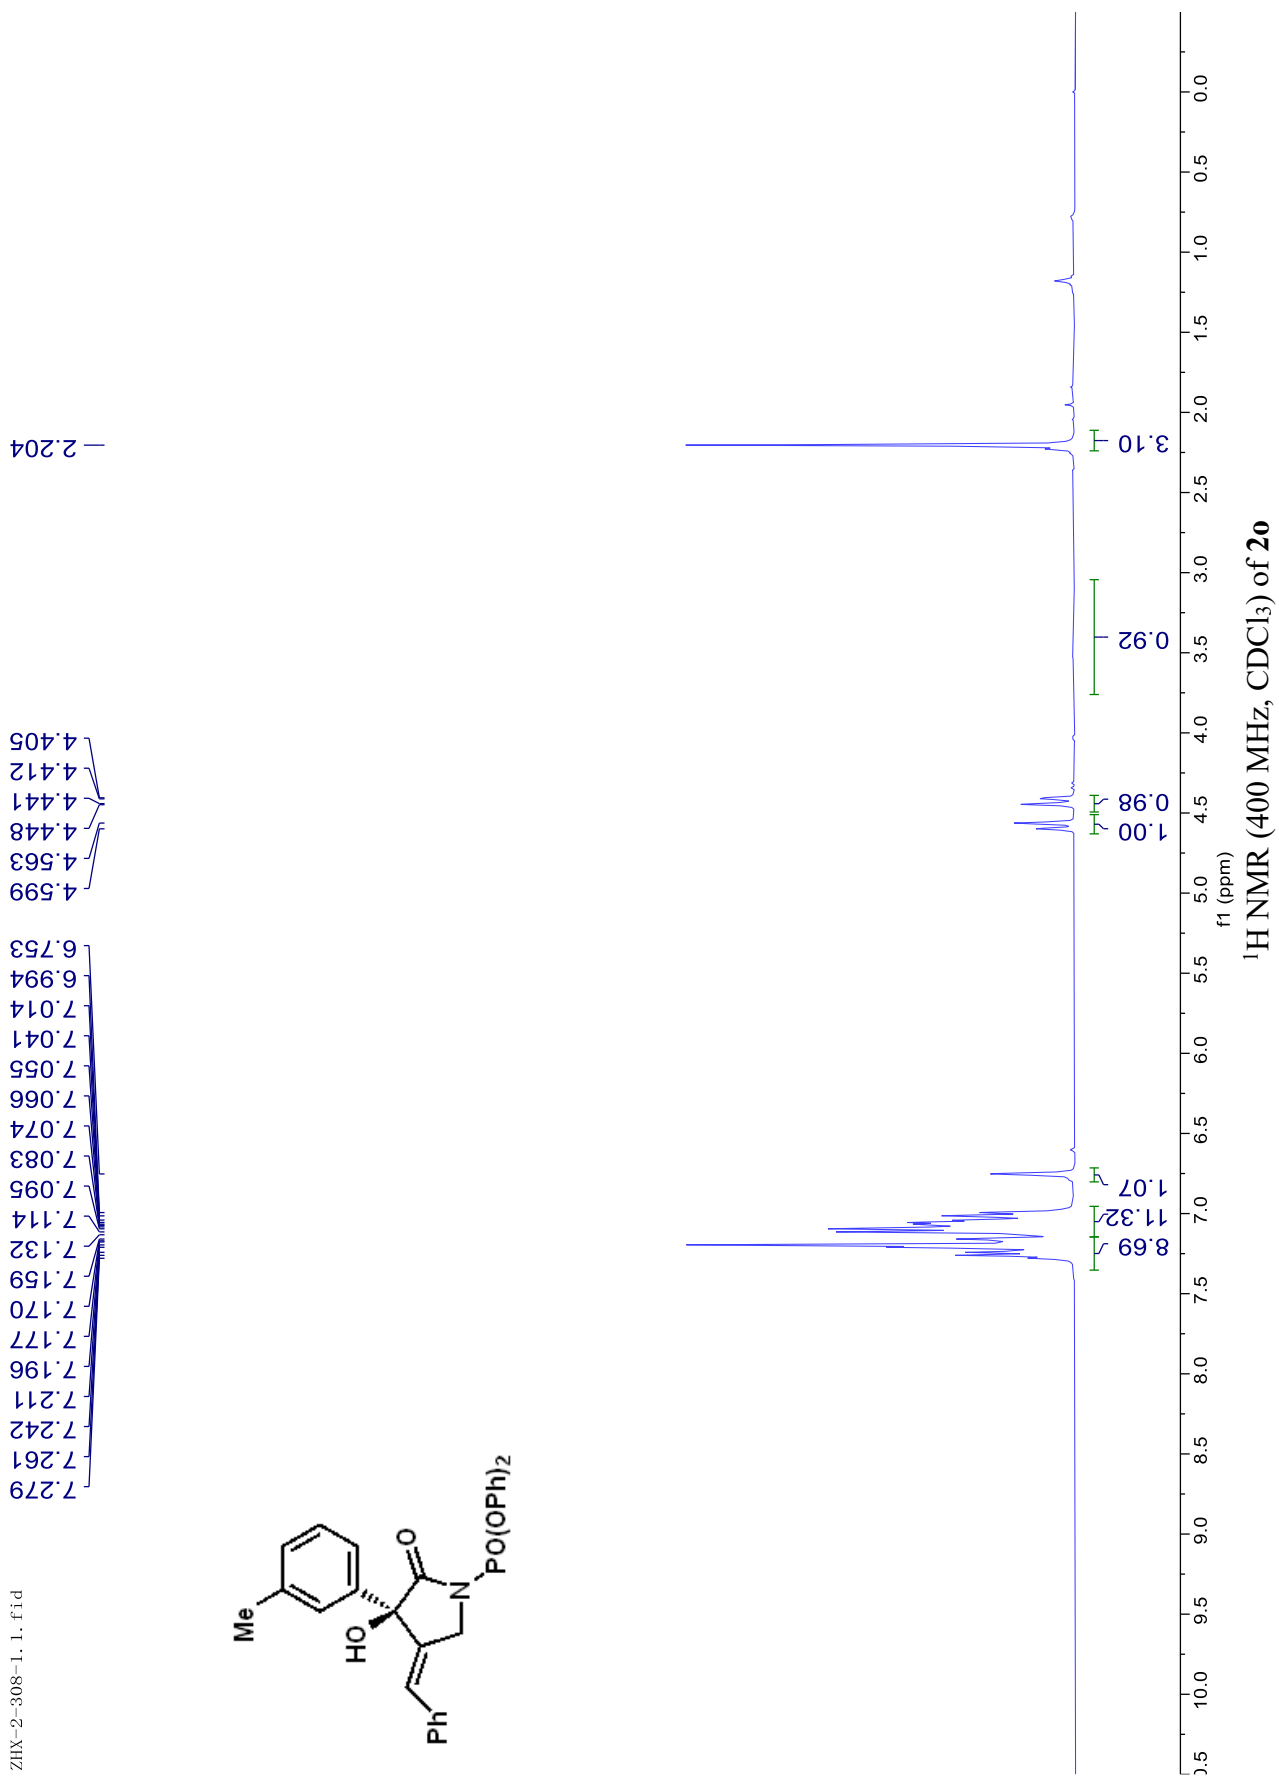

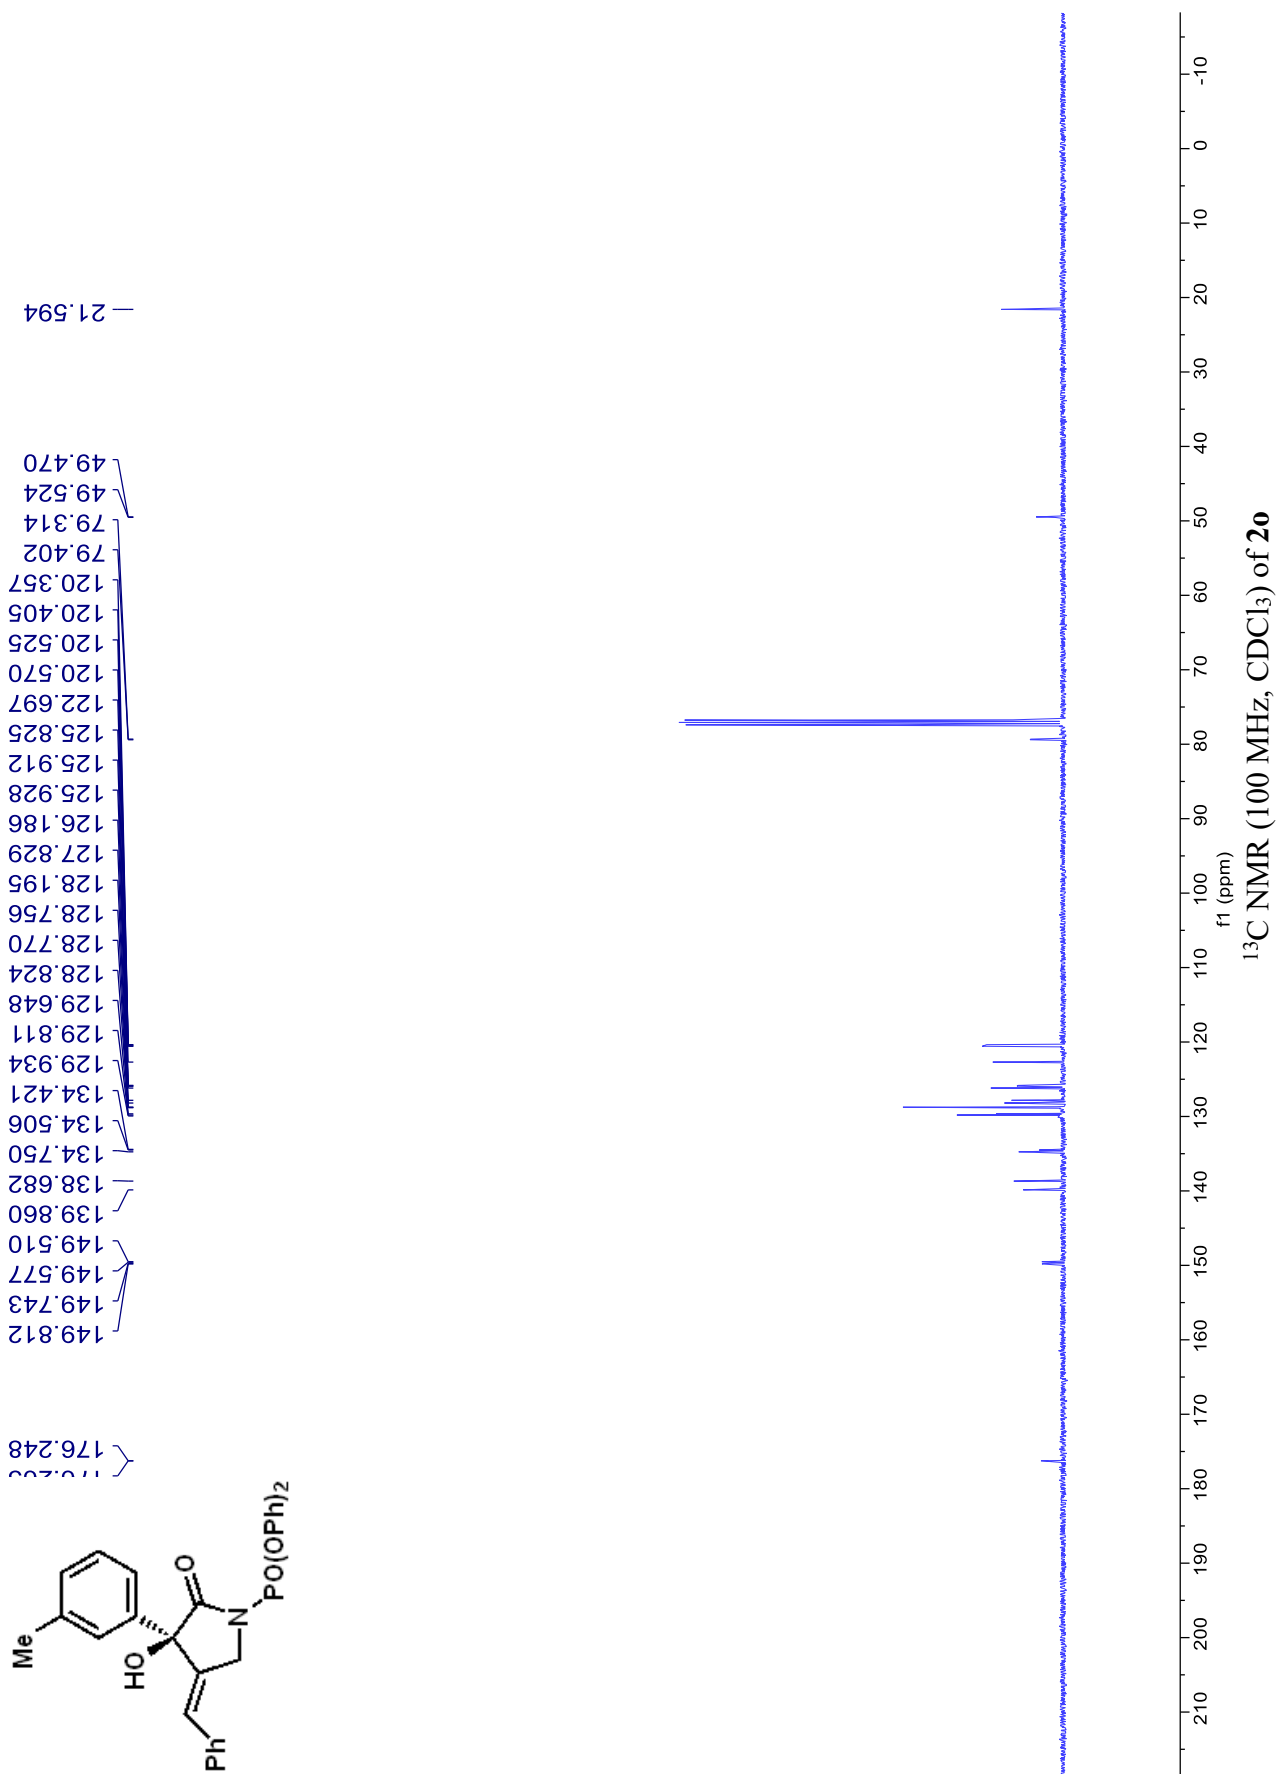



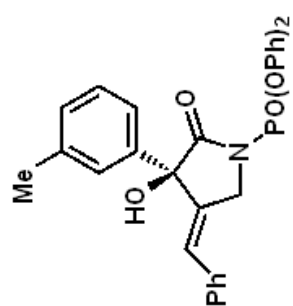

--12.414

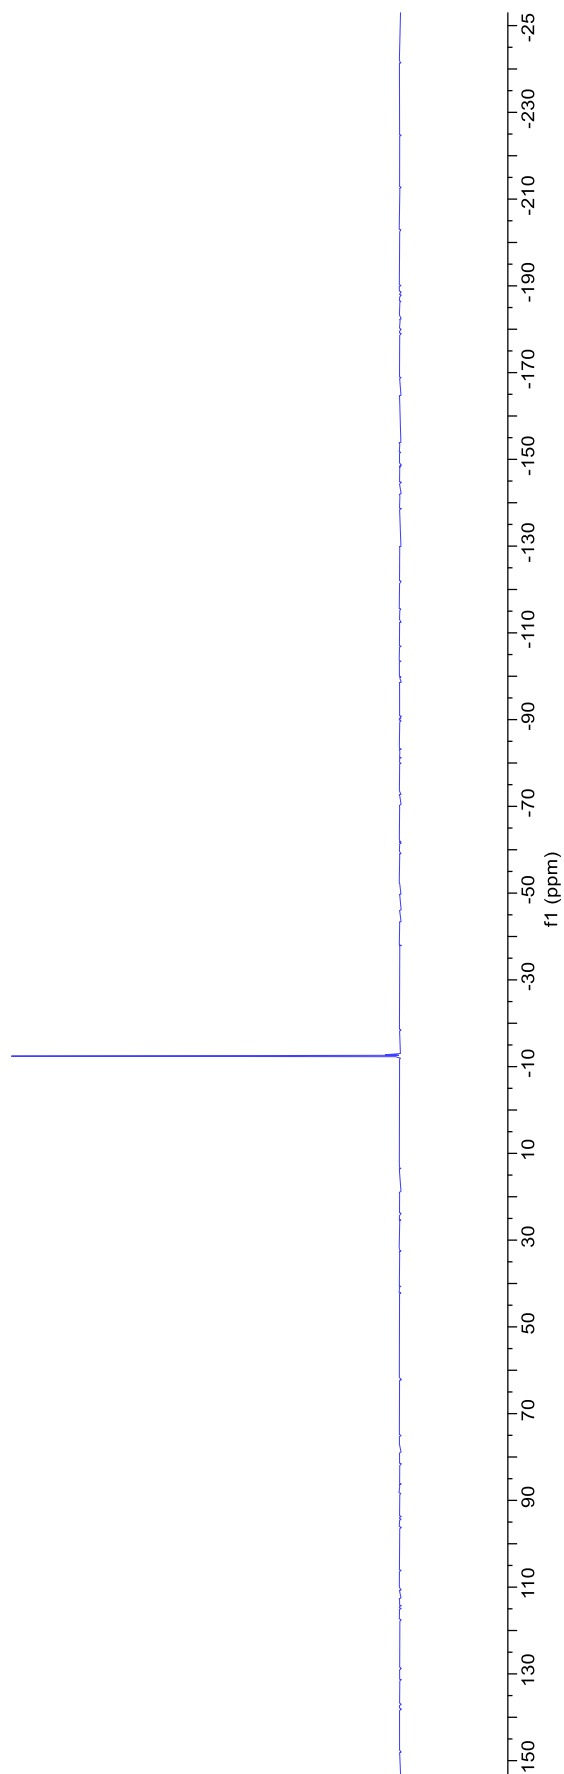

<sup>31</sup>P NMR (162 MHz, CDCl<sub>3</sub>) of **20**

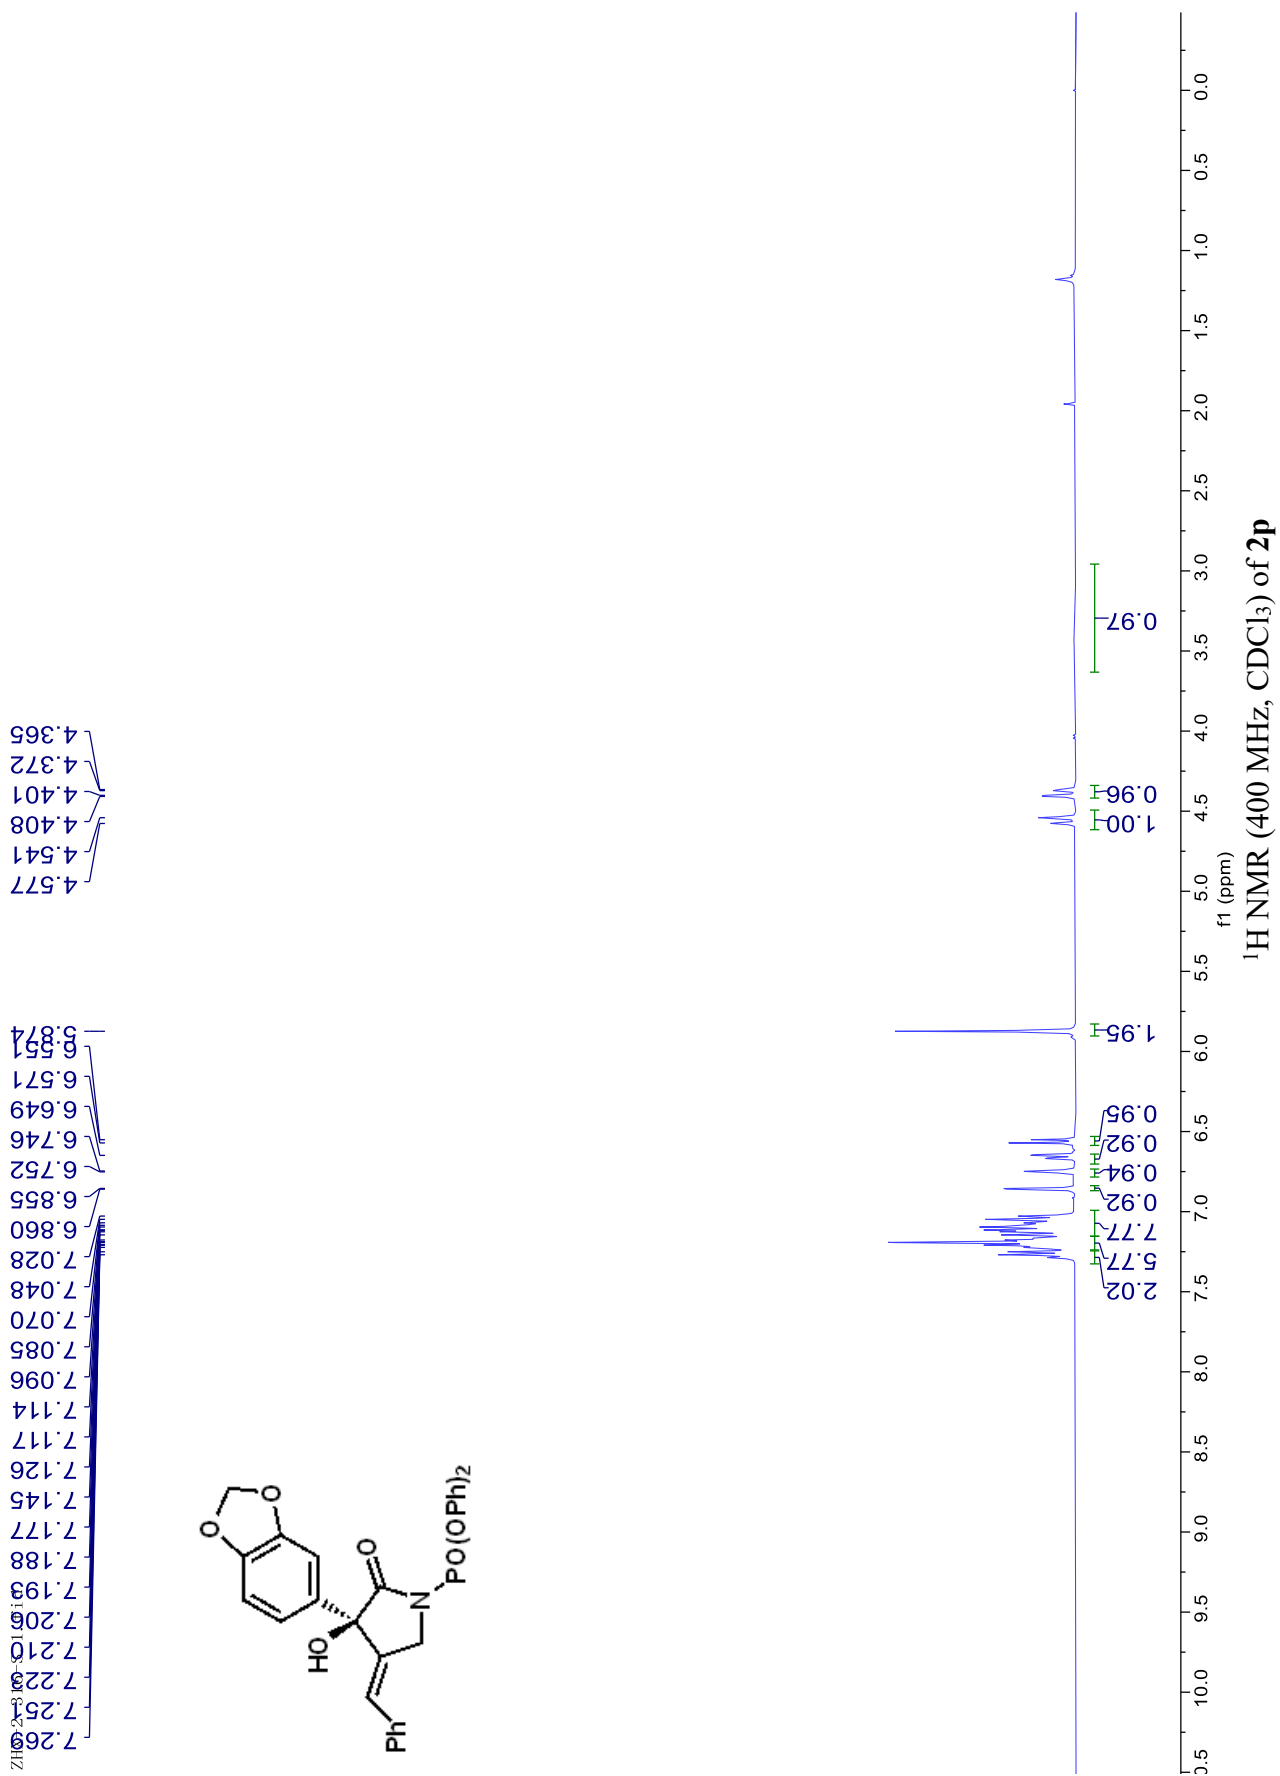

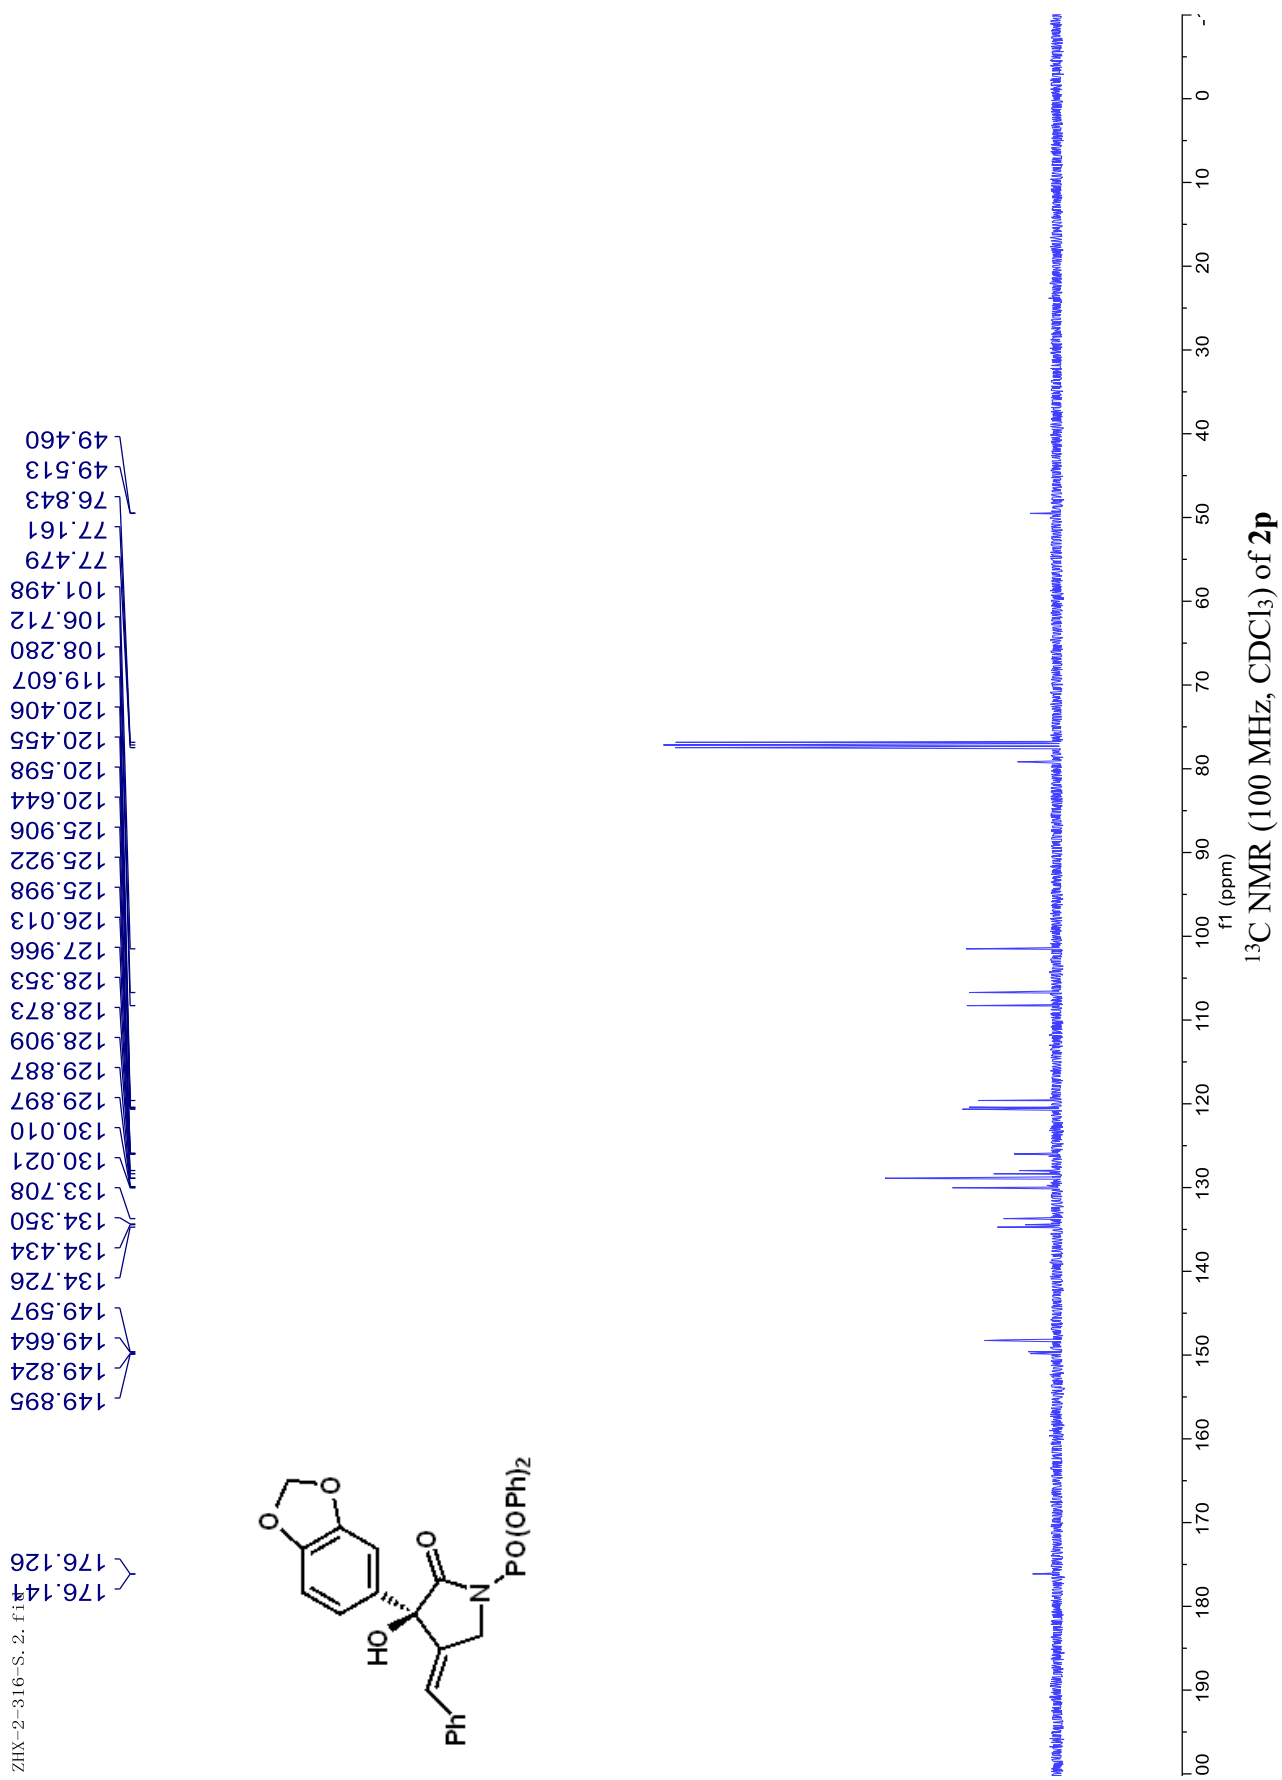

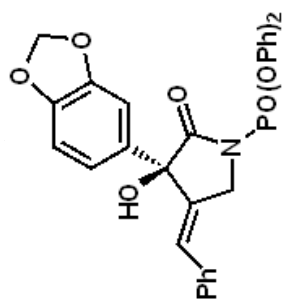

— -12.482

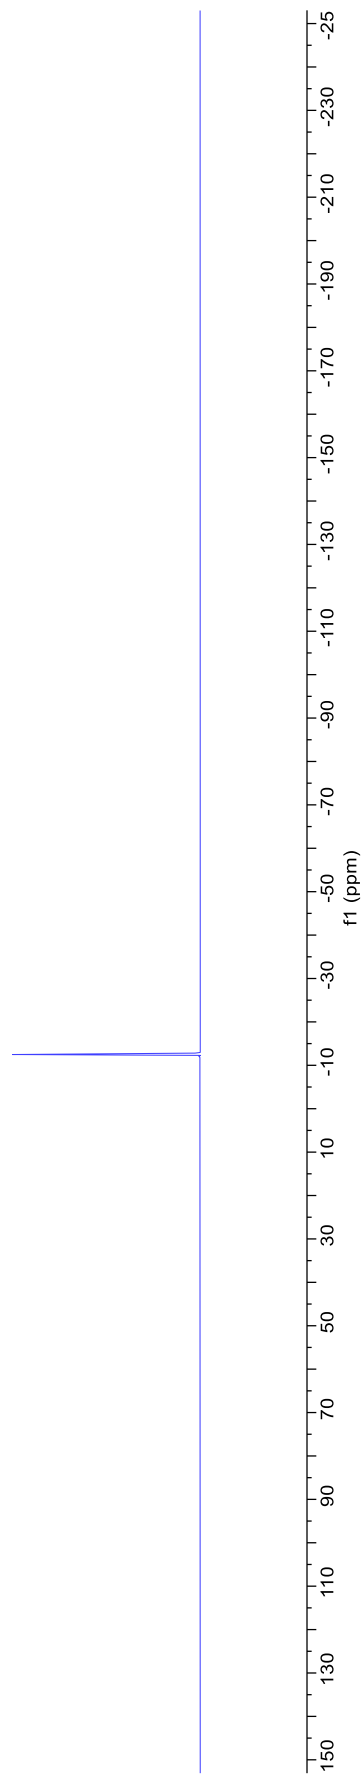

<sup>31</sup>P NMR (162 MHz, CDCl<sub>3</sub>) of 2p

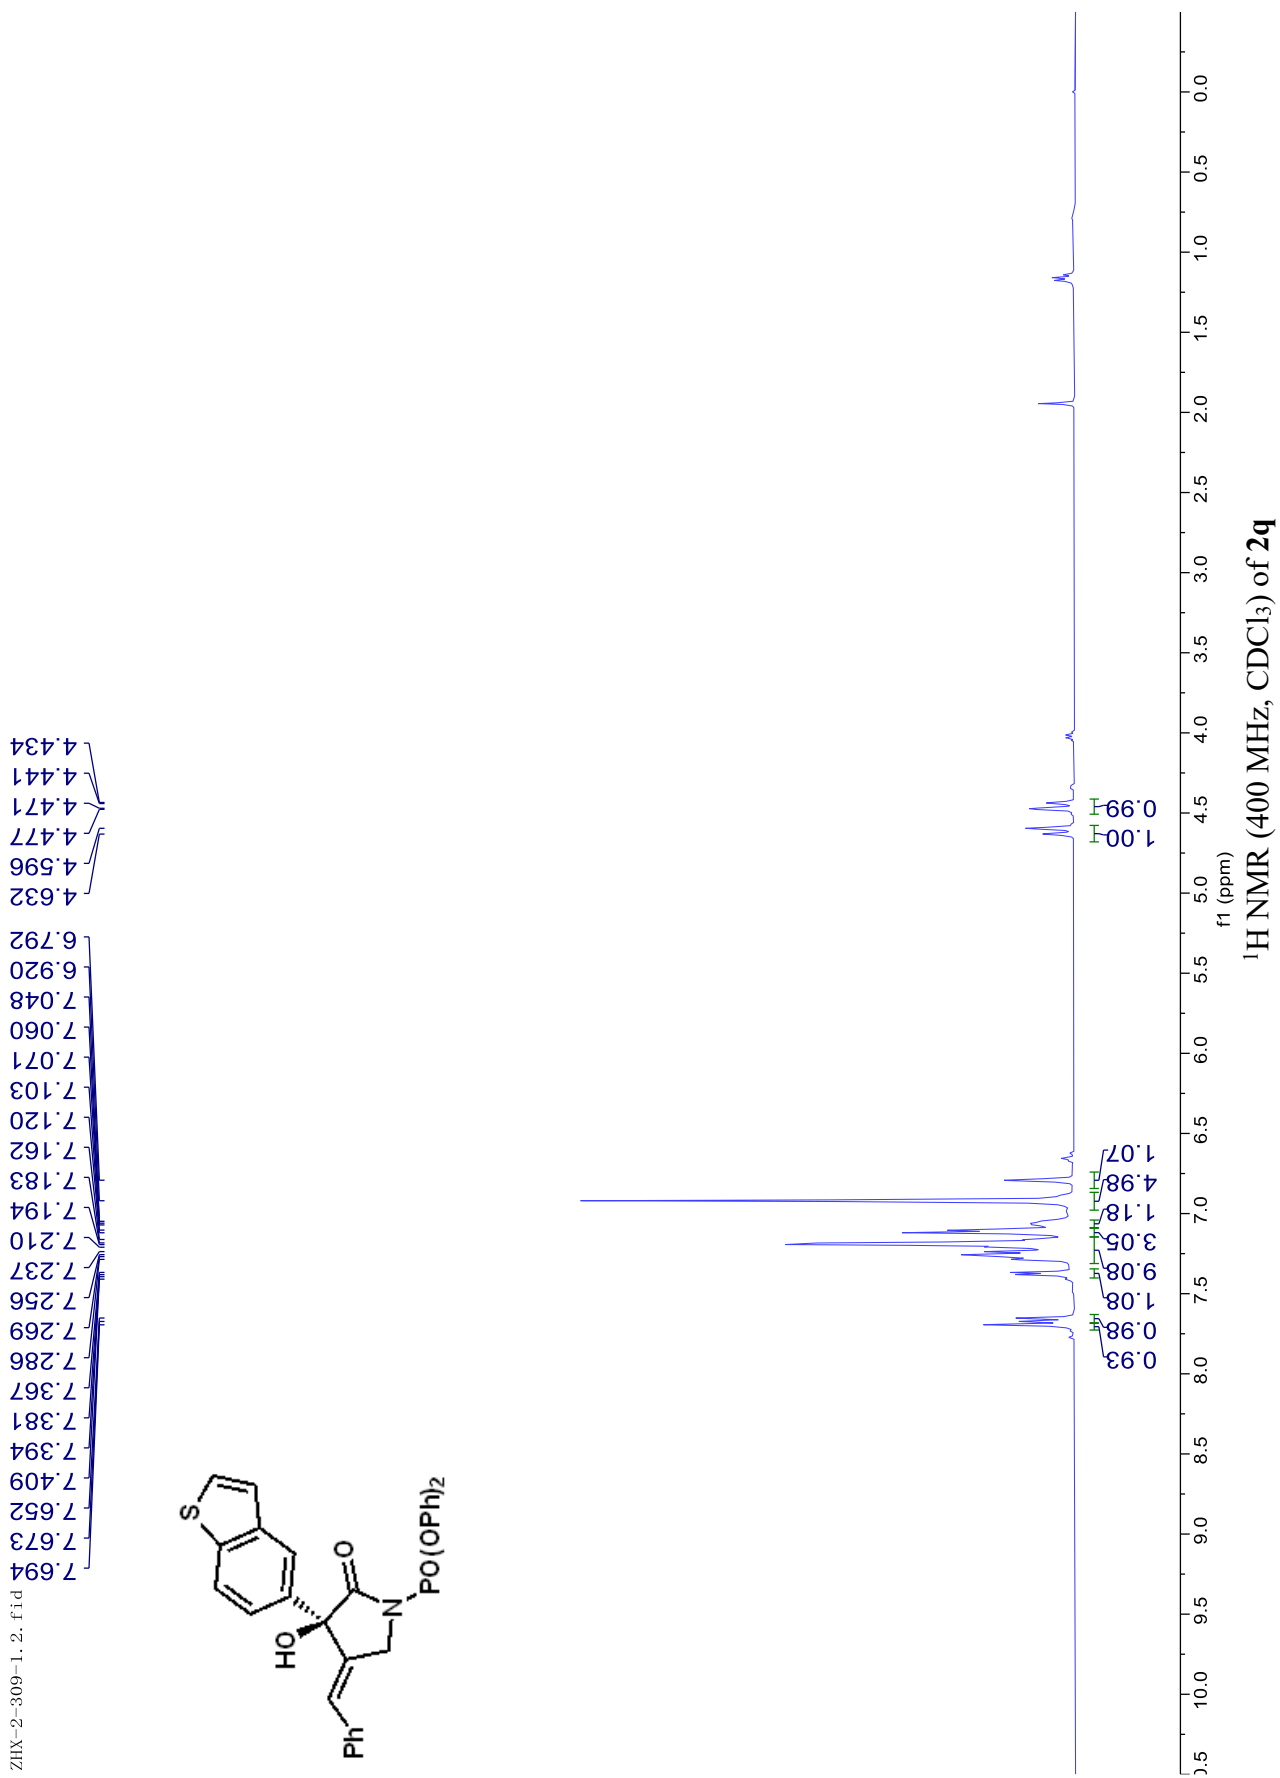



ZHX-2-309-1\_4.fid

--12.482

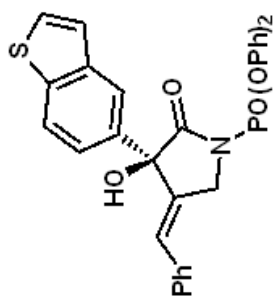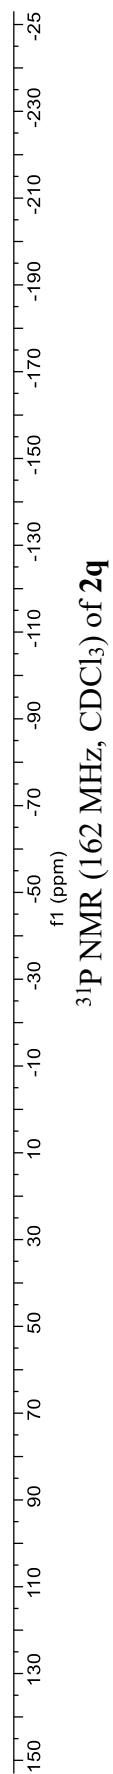





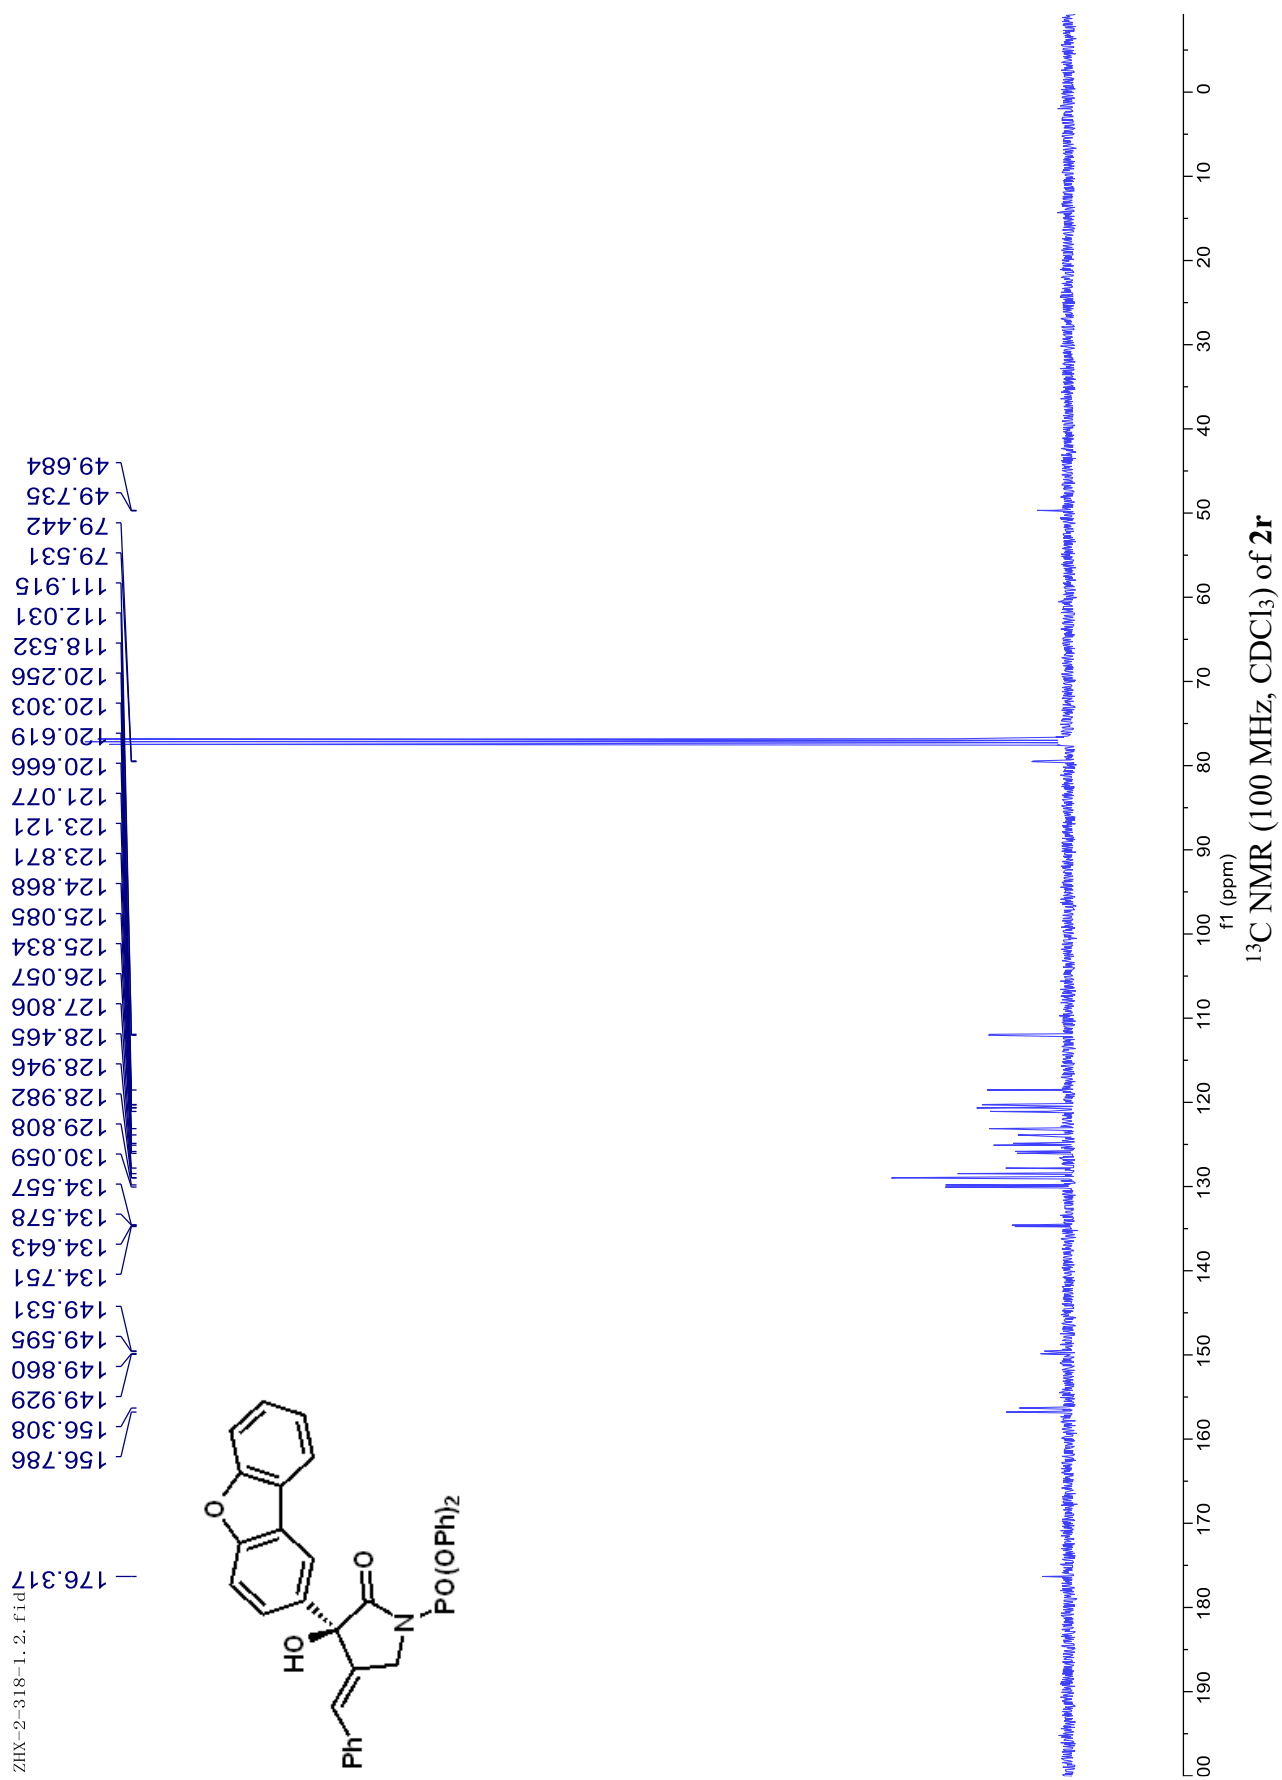

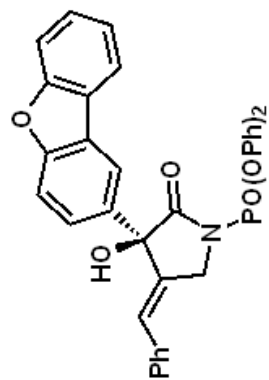

— -12.589

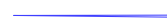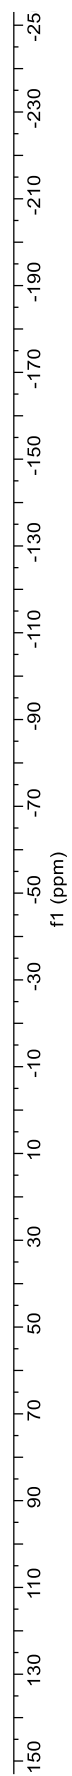

<sup>31</sup>P NMR (162 MHz, CDCl<sub>3</sub>) of **2r**



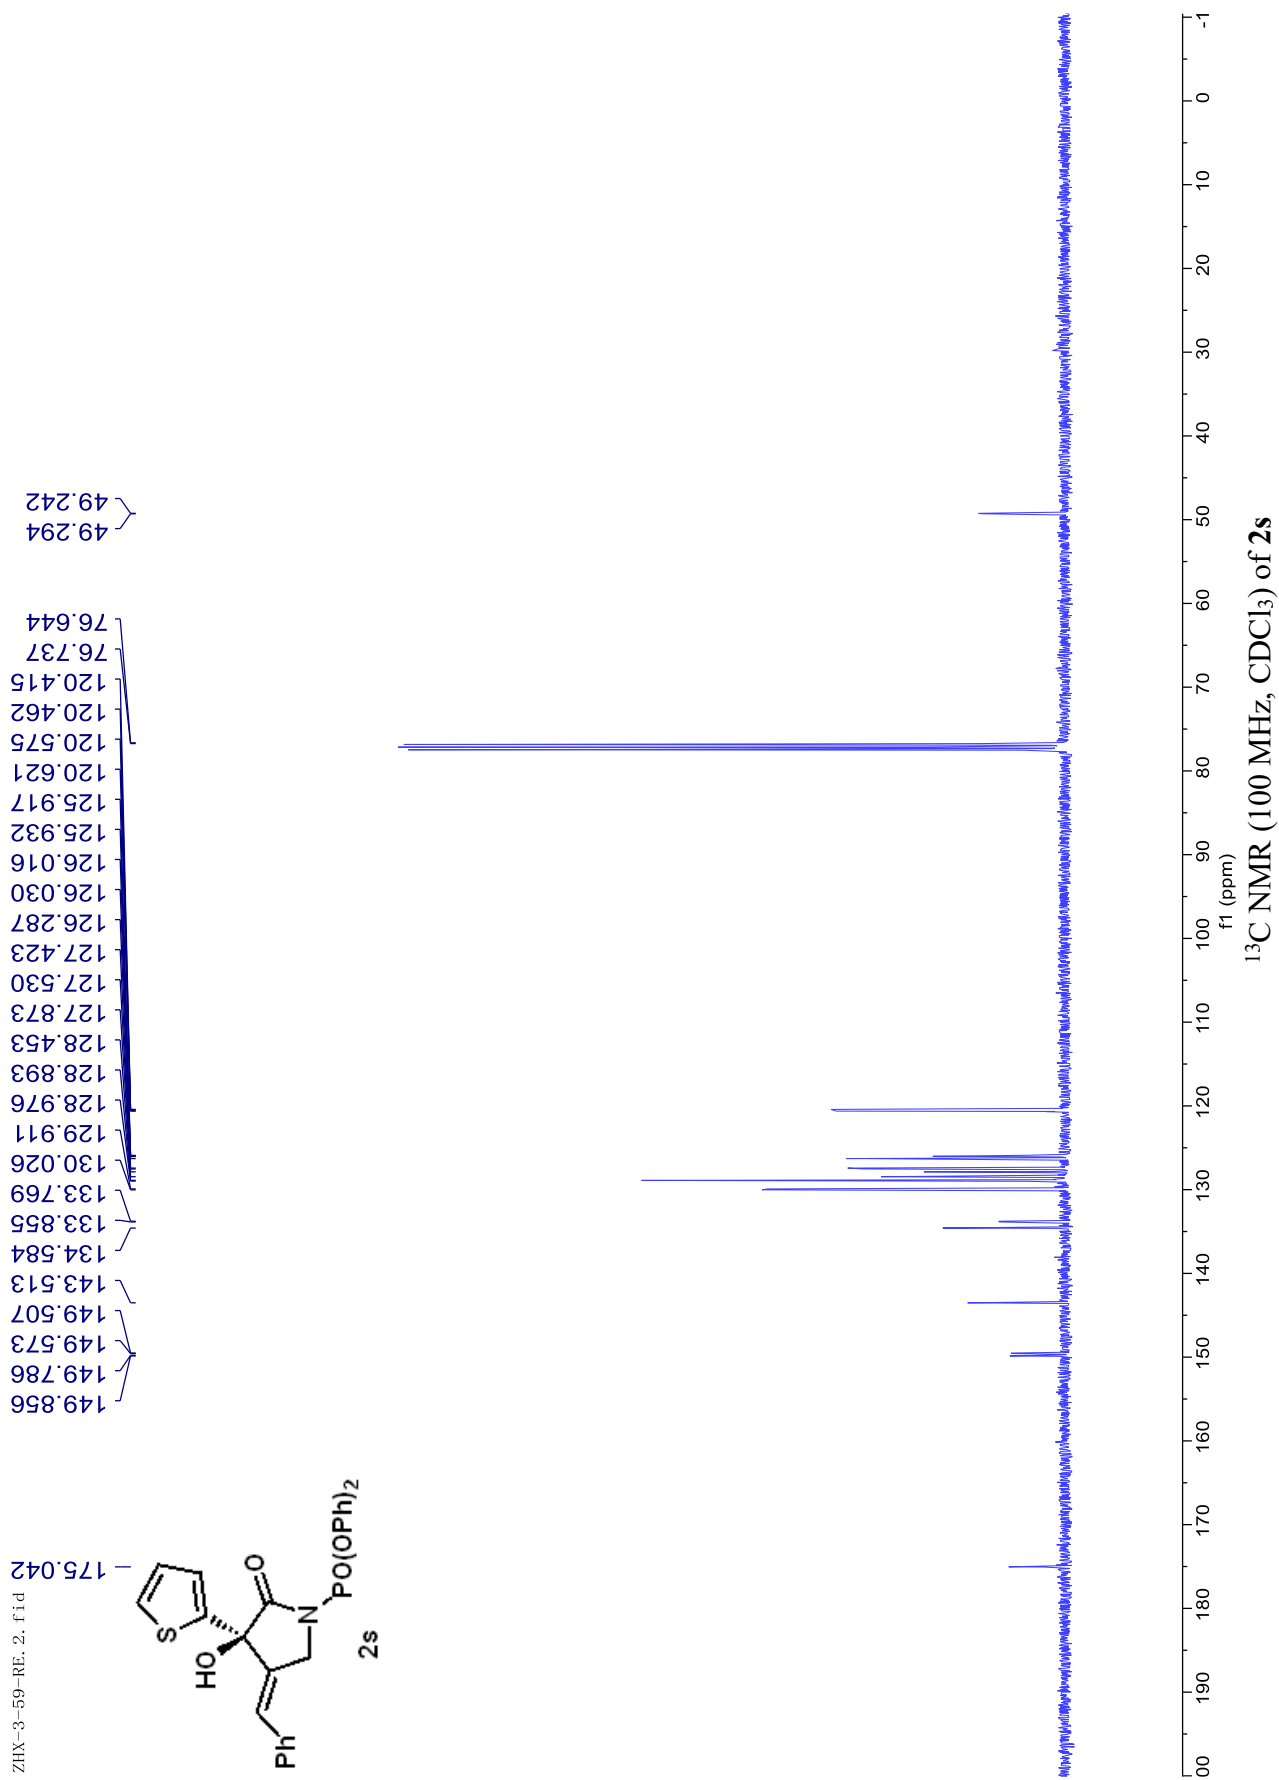

ZHX-3-59-1.2.fid

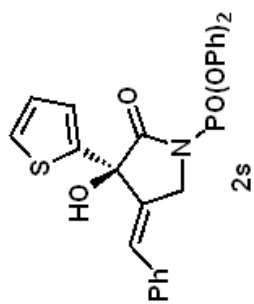

— -12.594

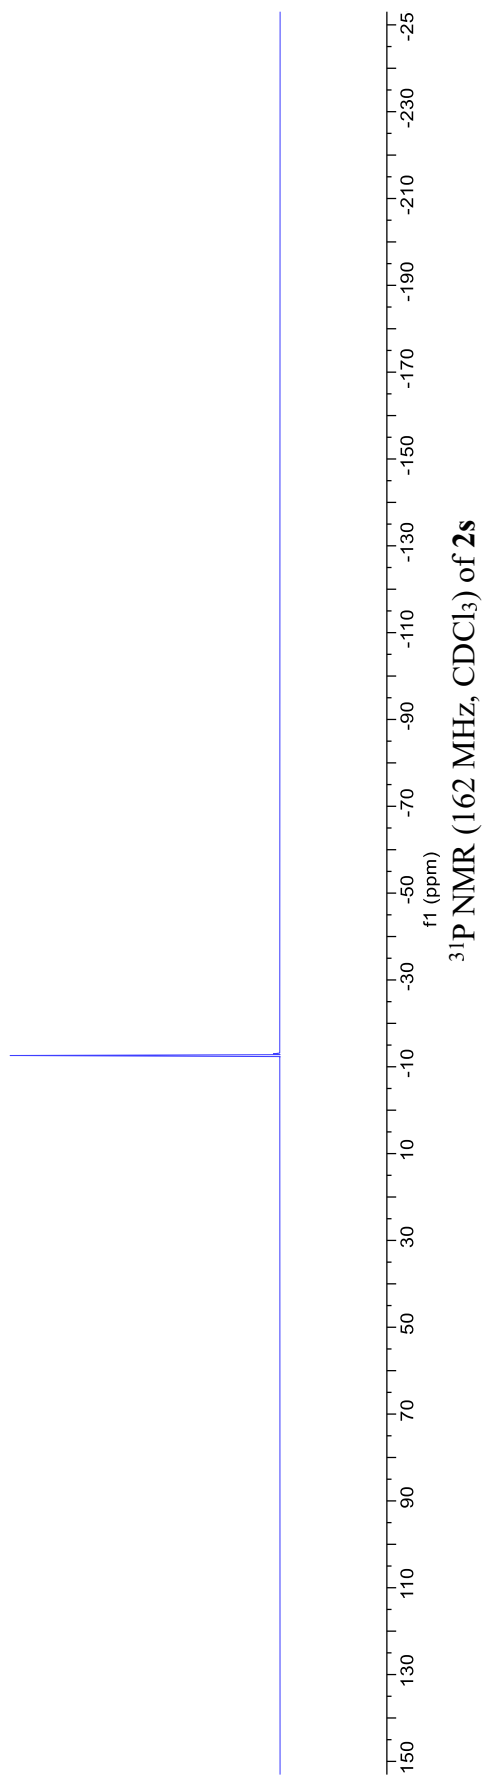

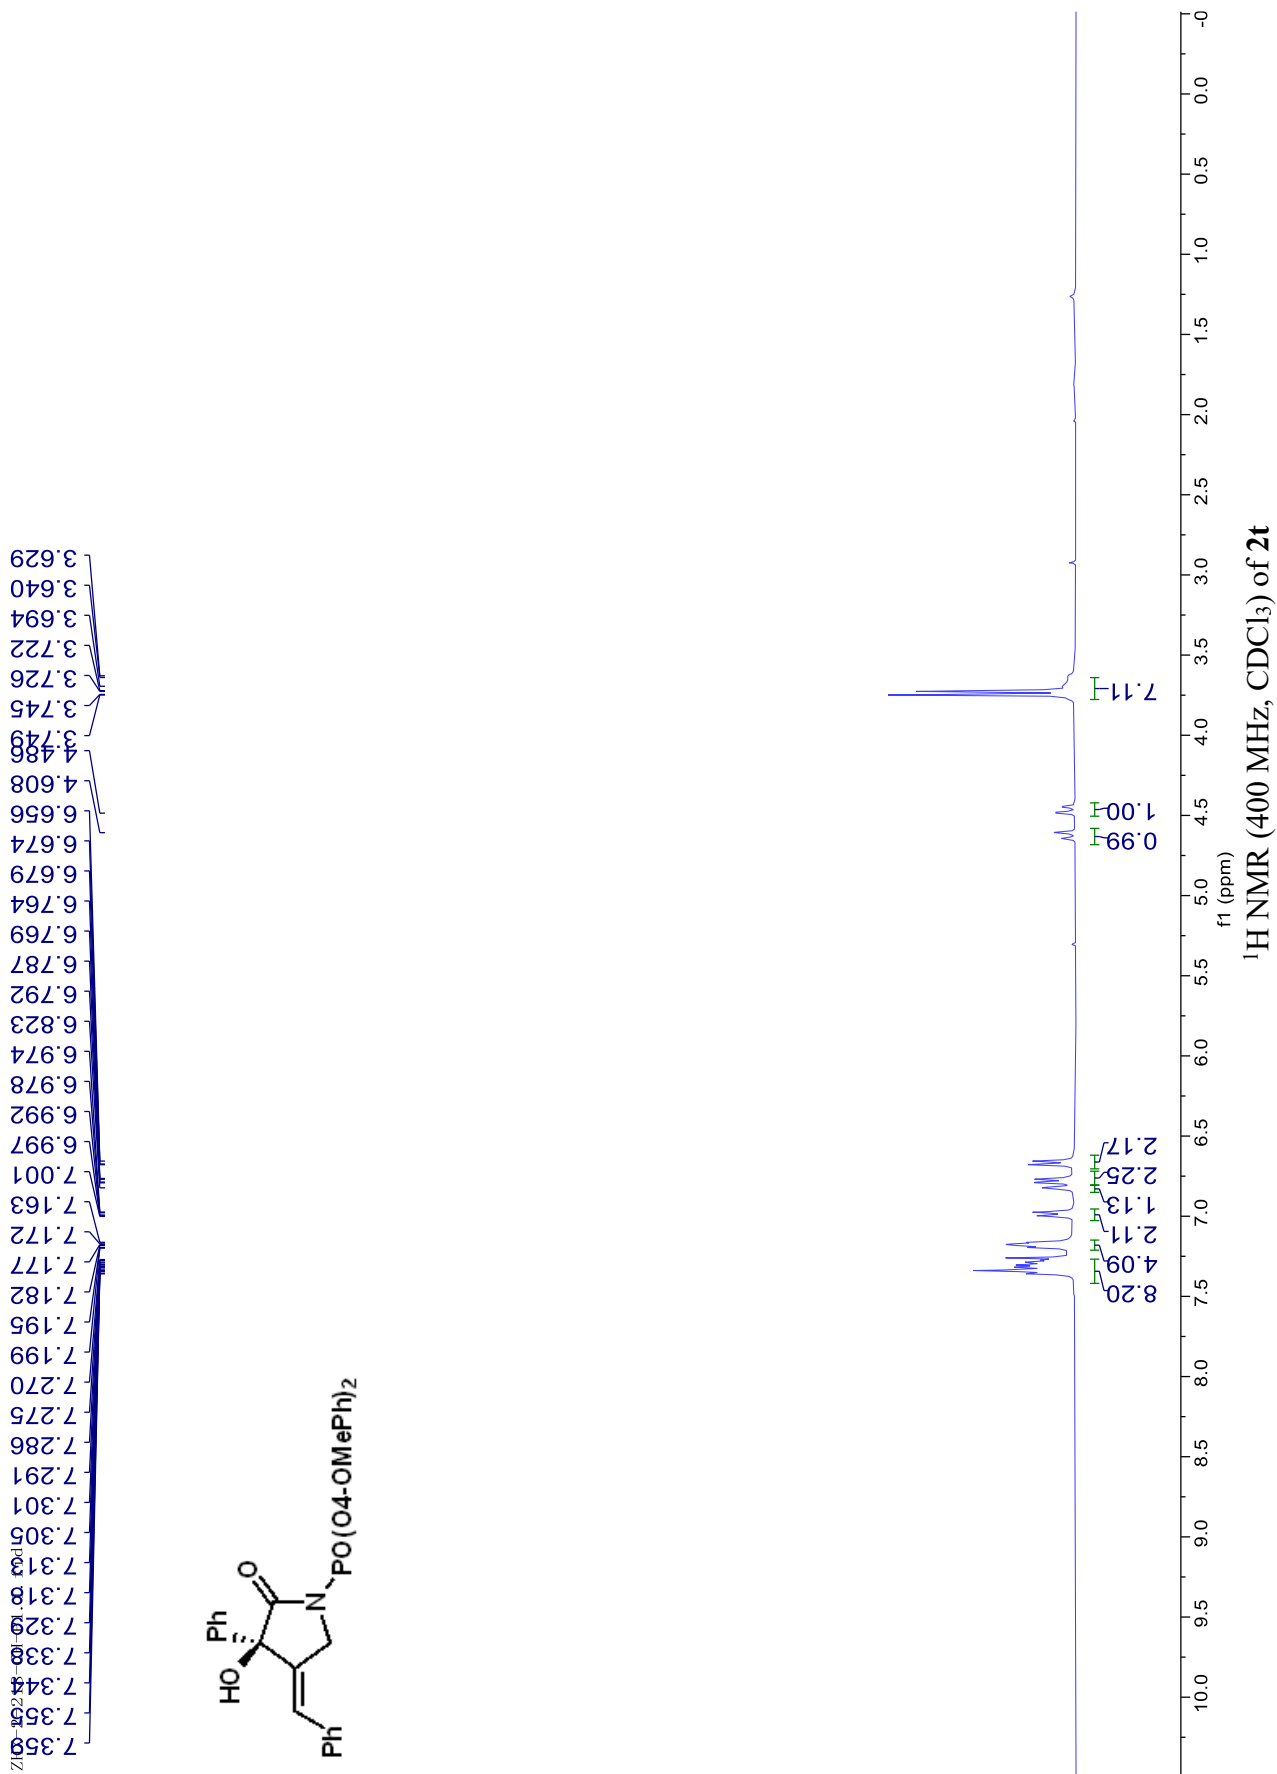

ZHX-2-218-CH-PI. 301d

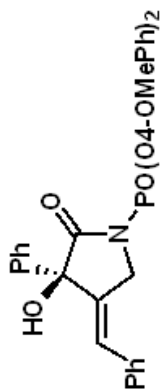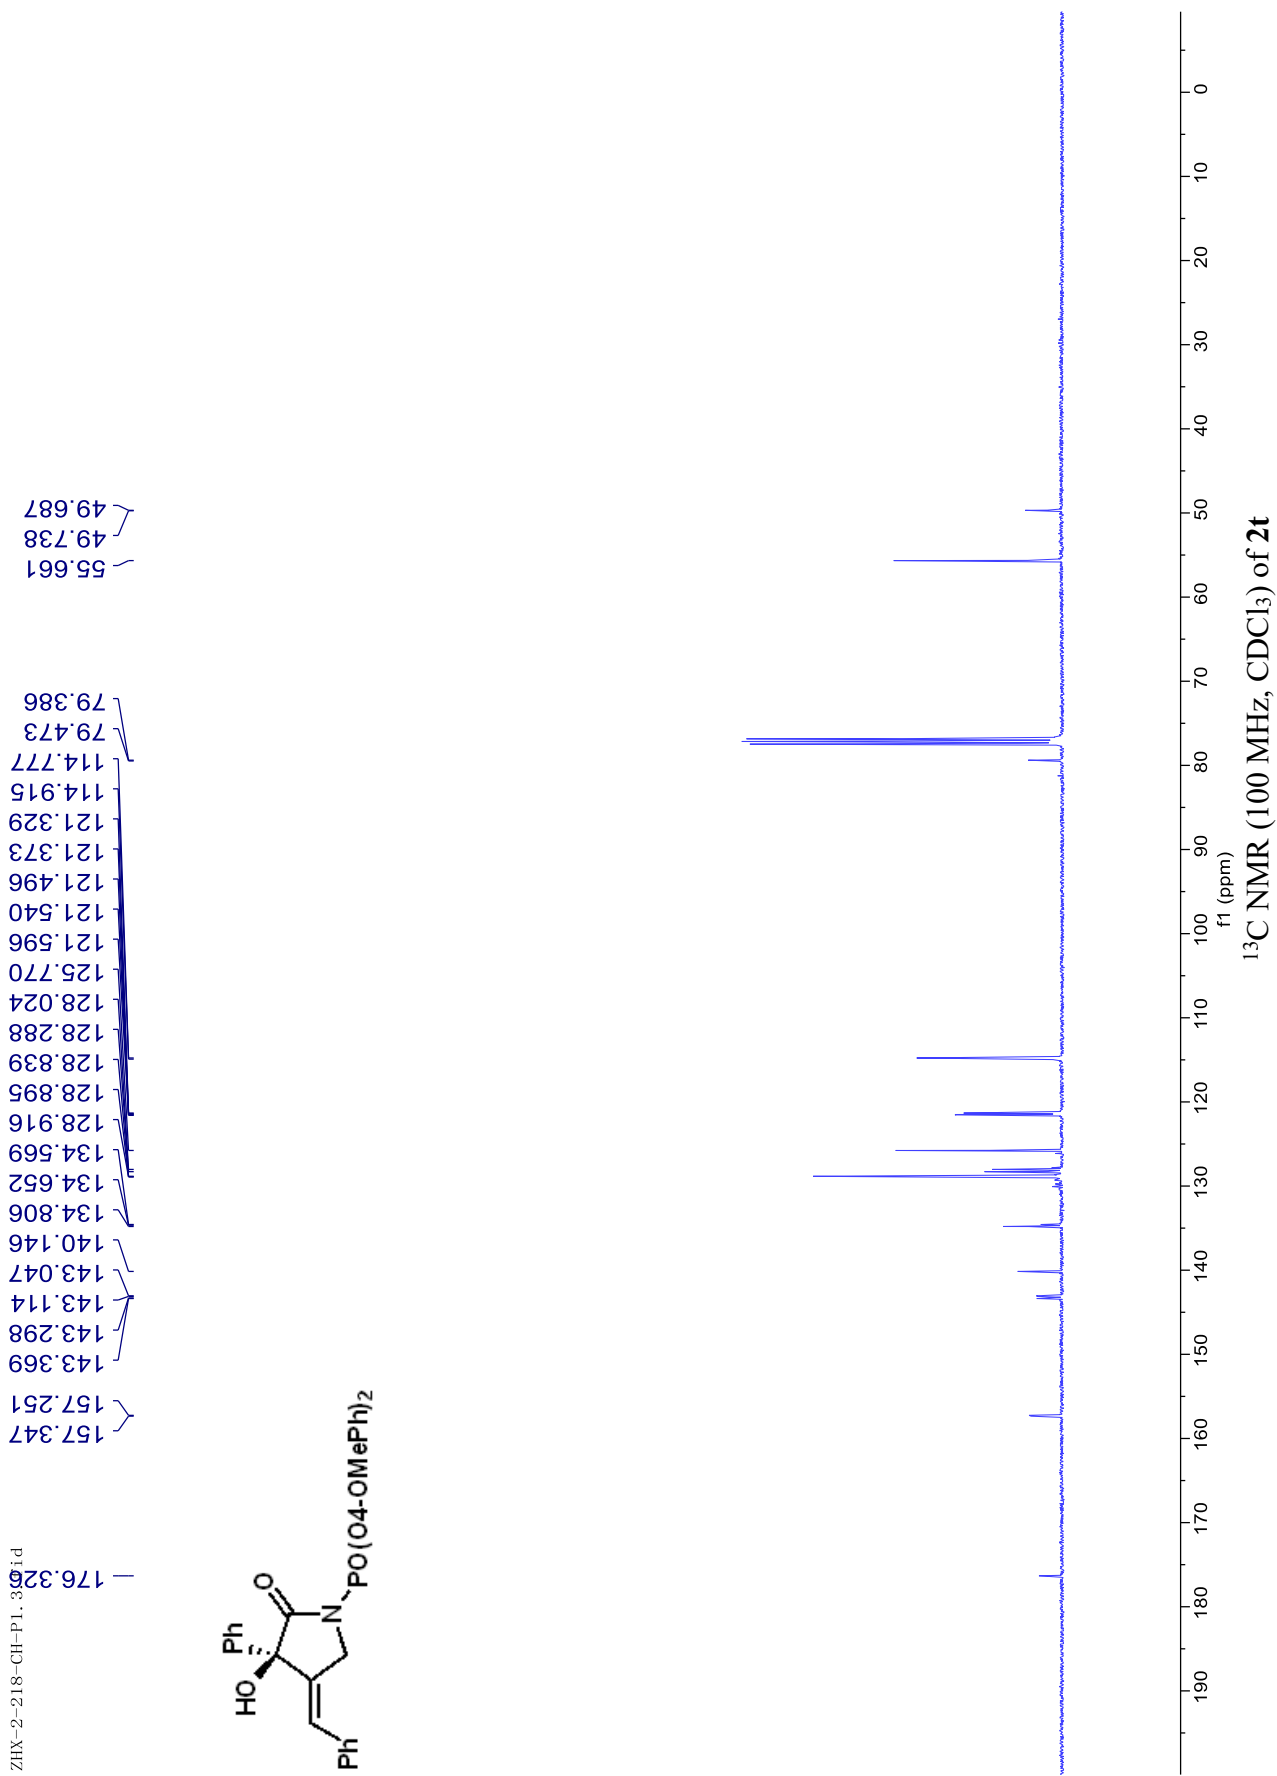

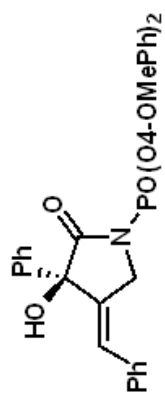

-11.414

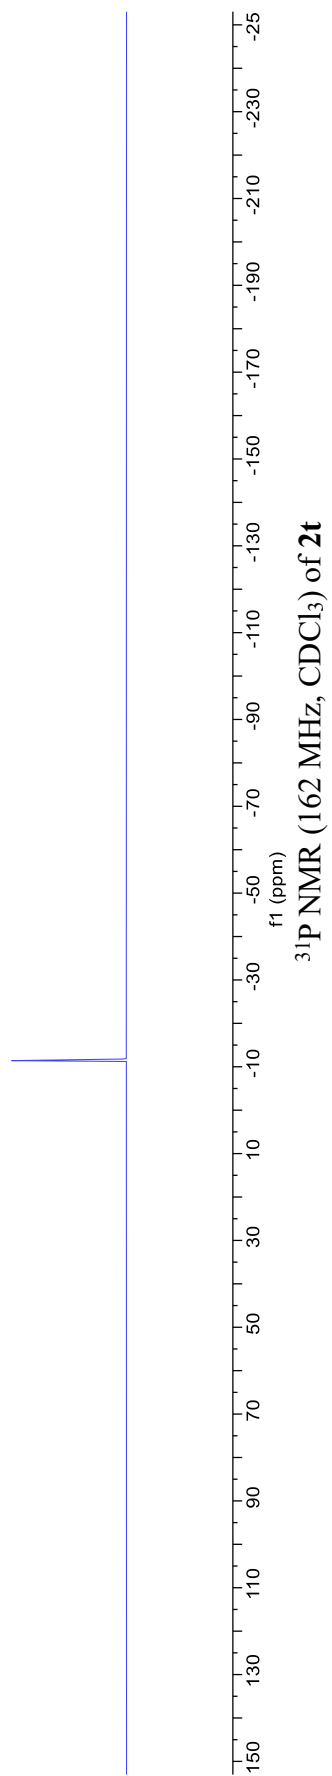





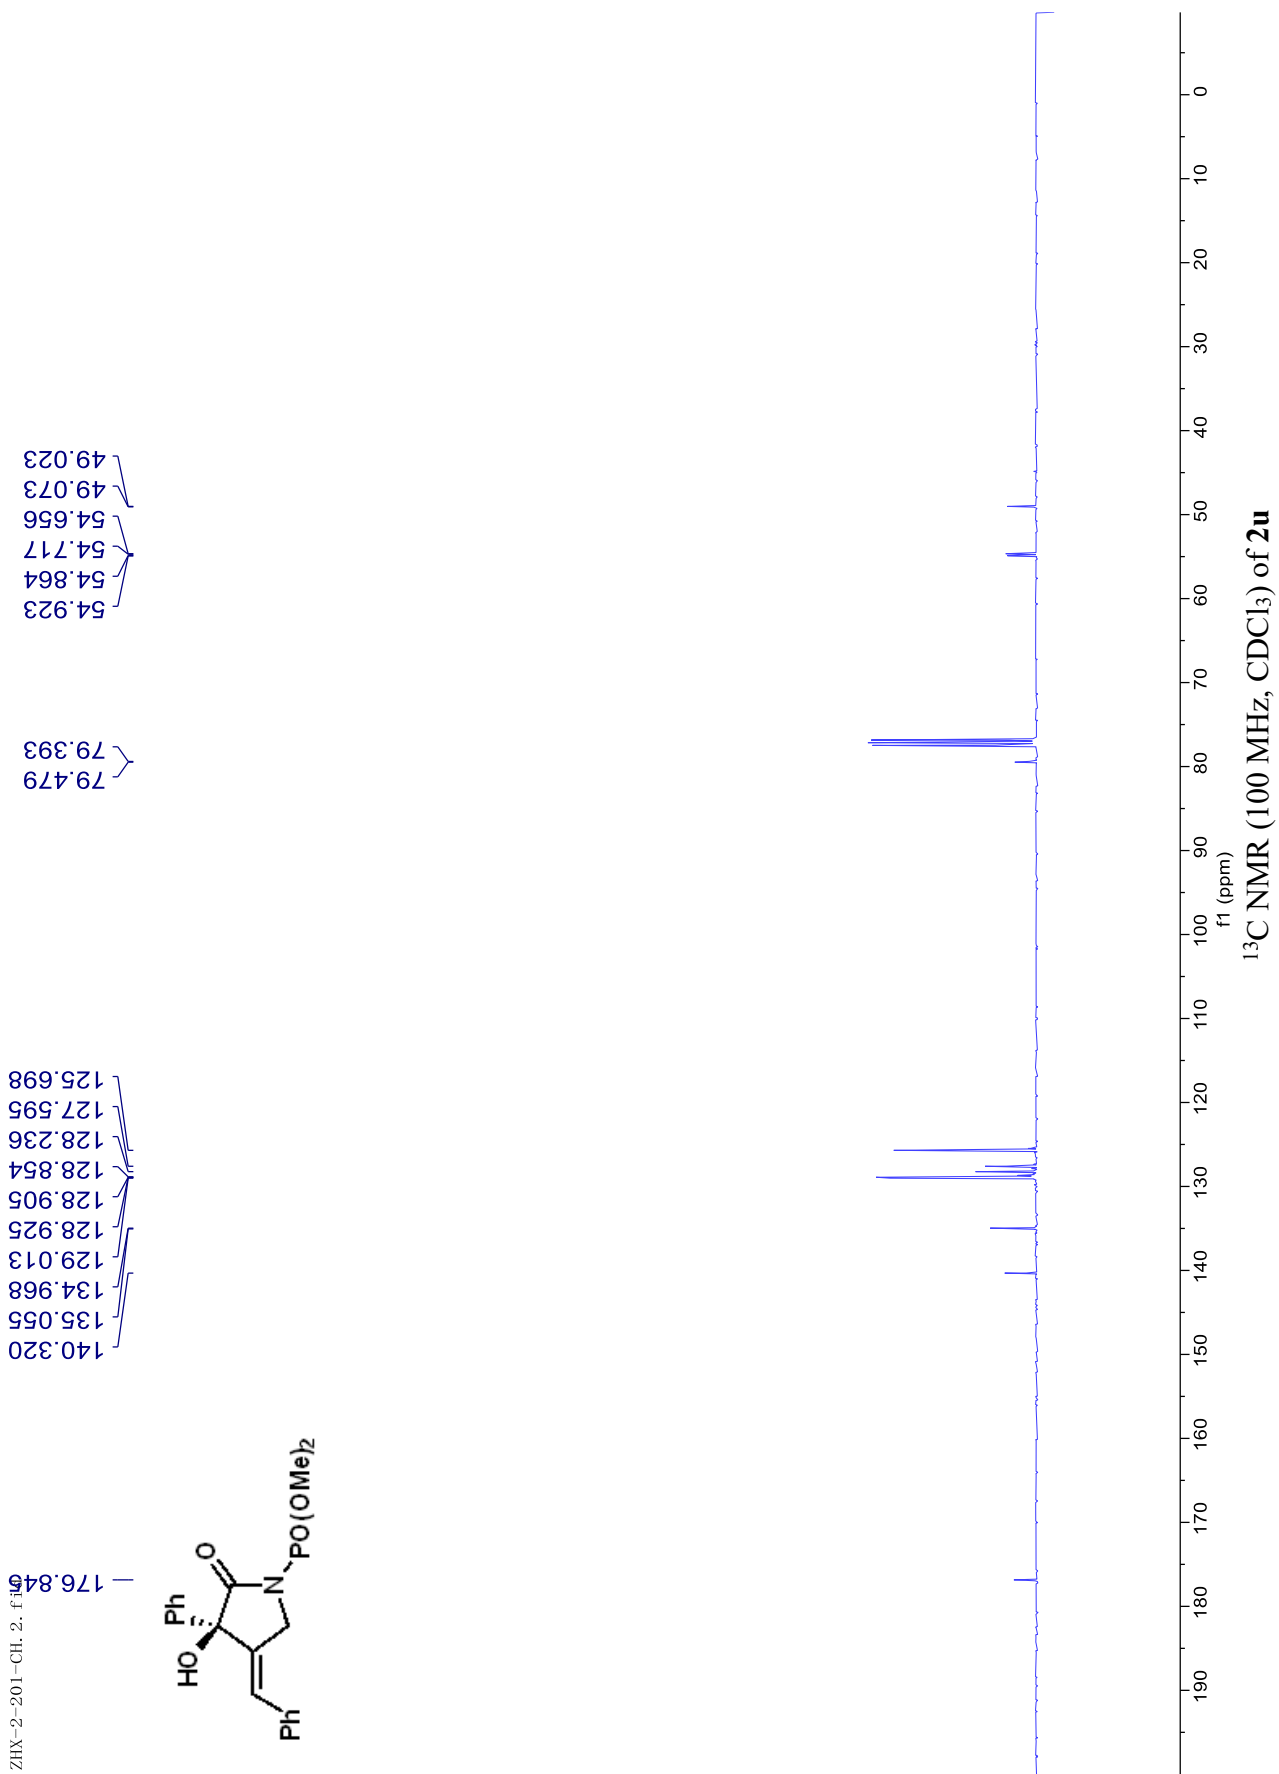

ZHX-2-201-31P. 1. fid

-0.681

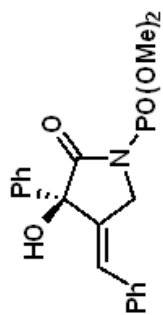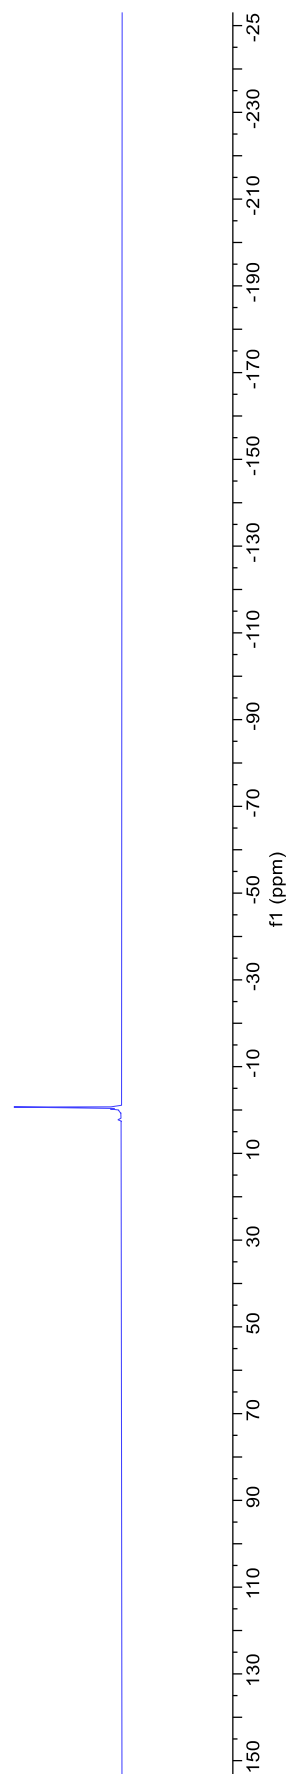



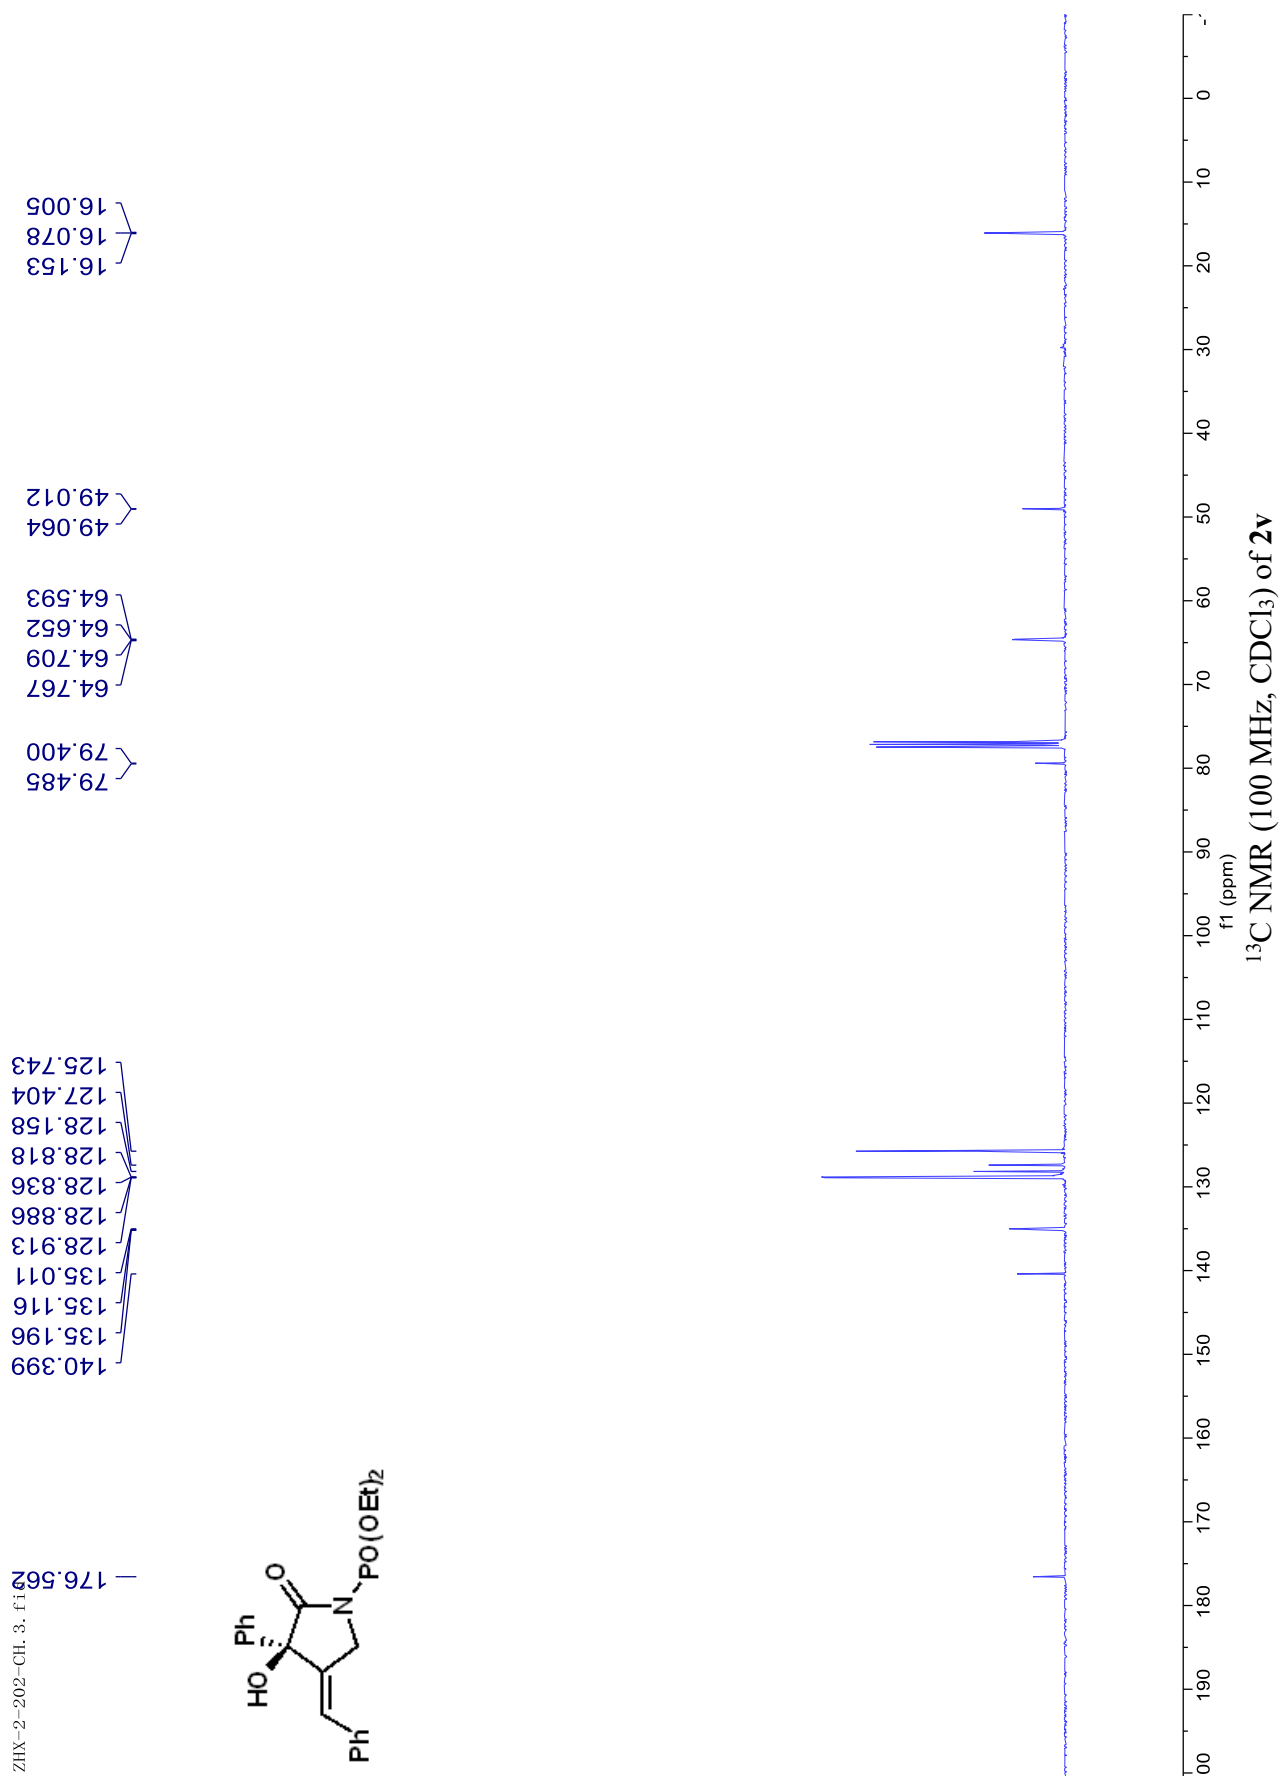

ZHX-2-202-31P. 1. fid

-3.705

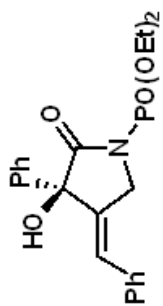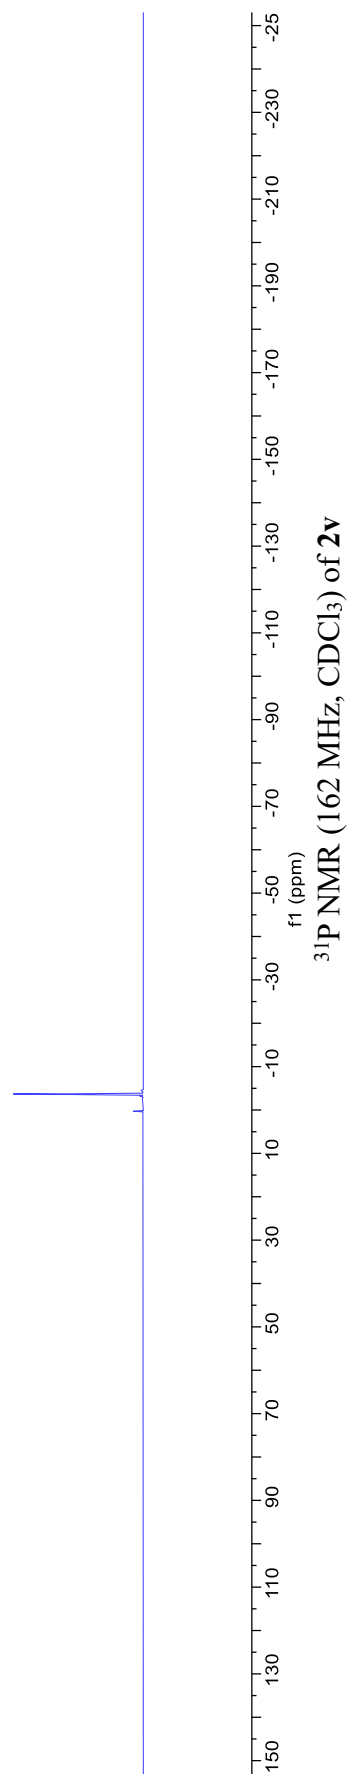

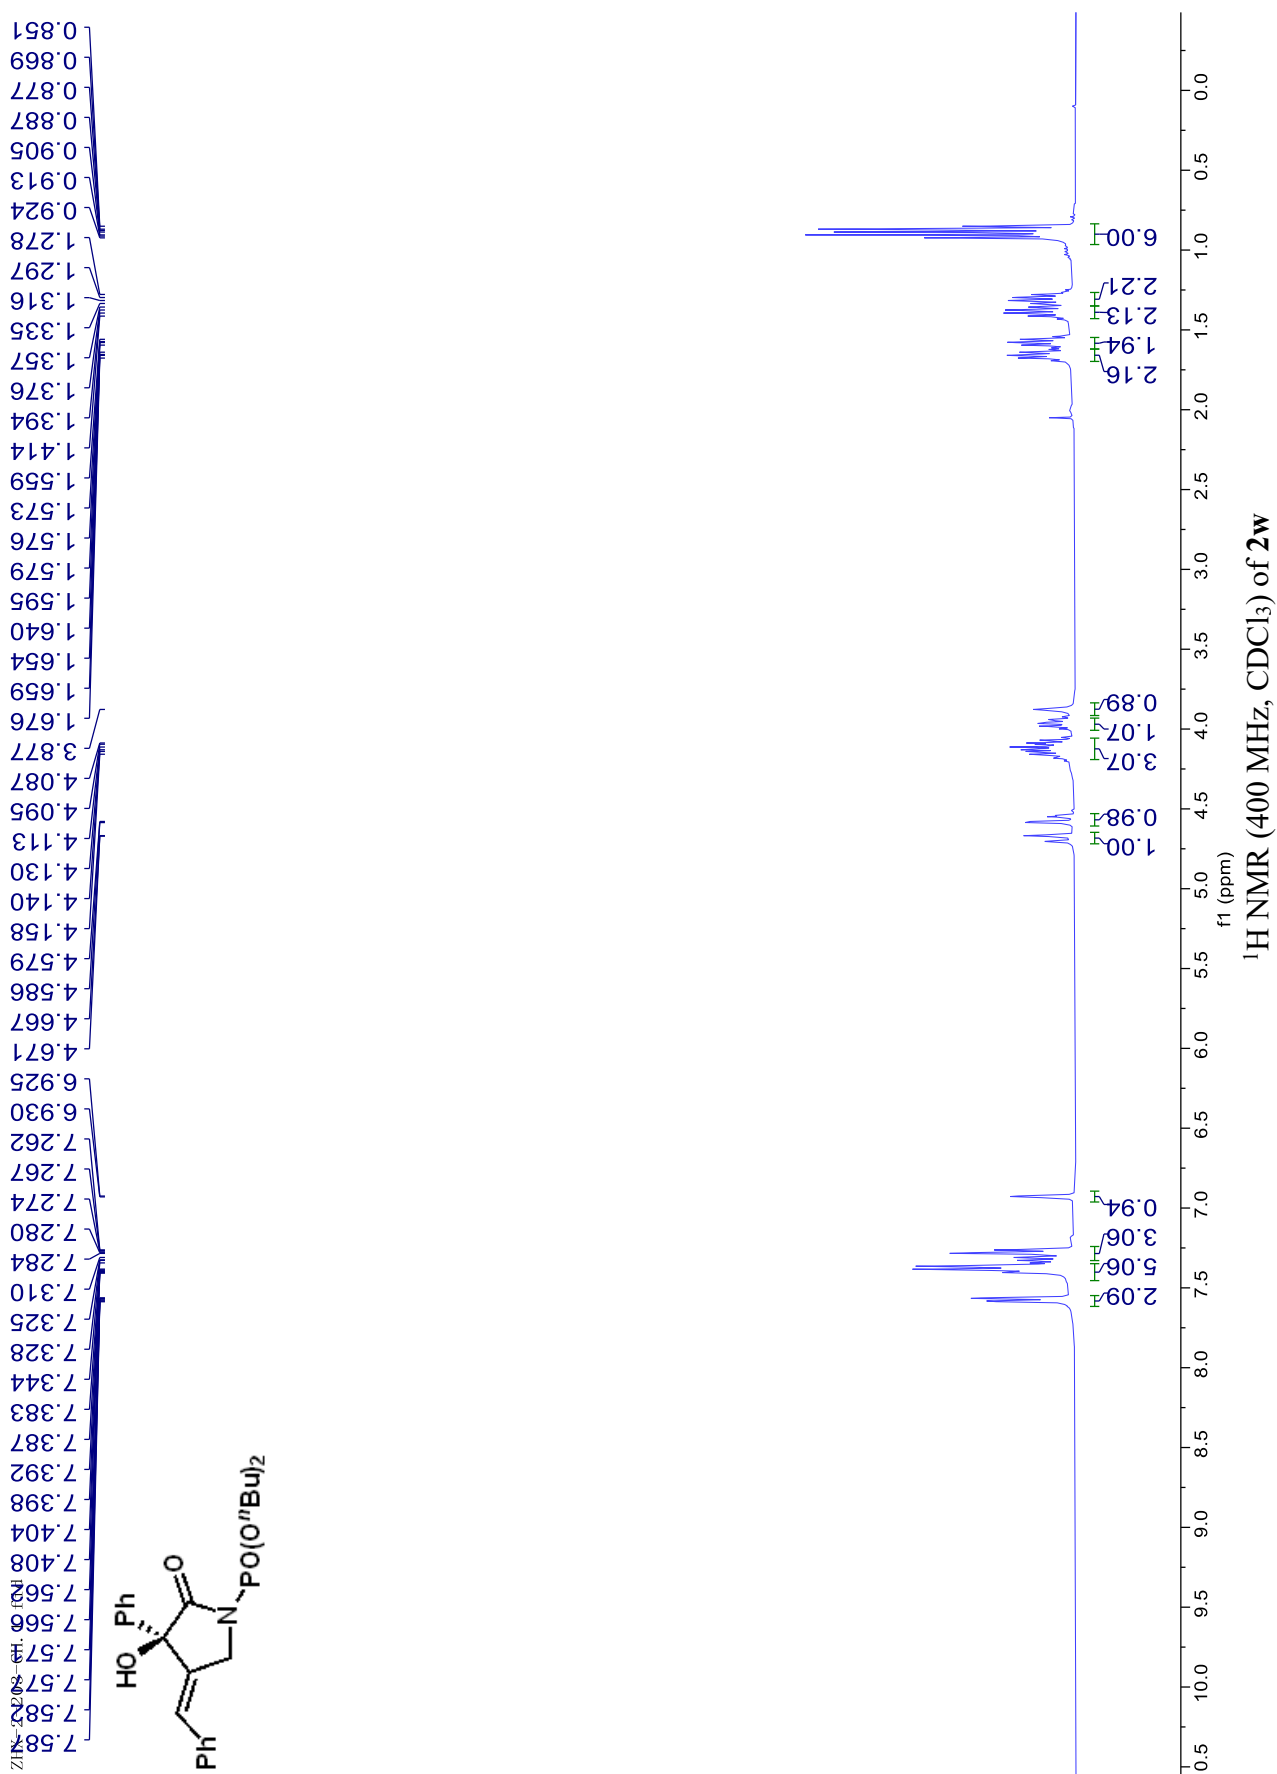

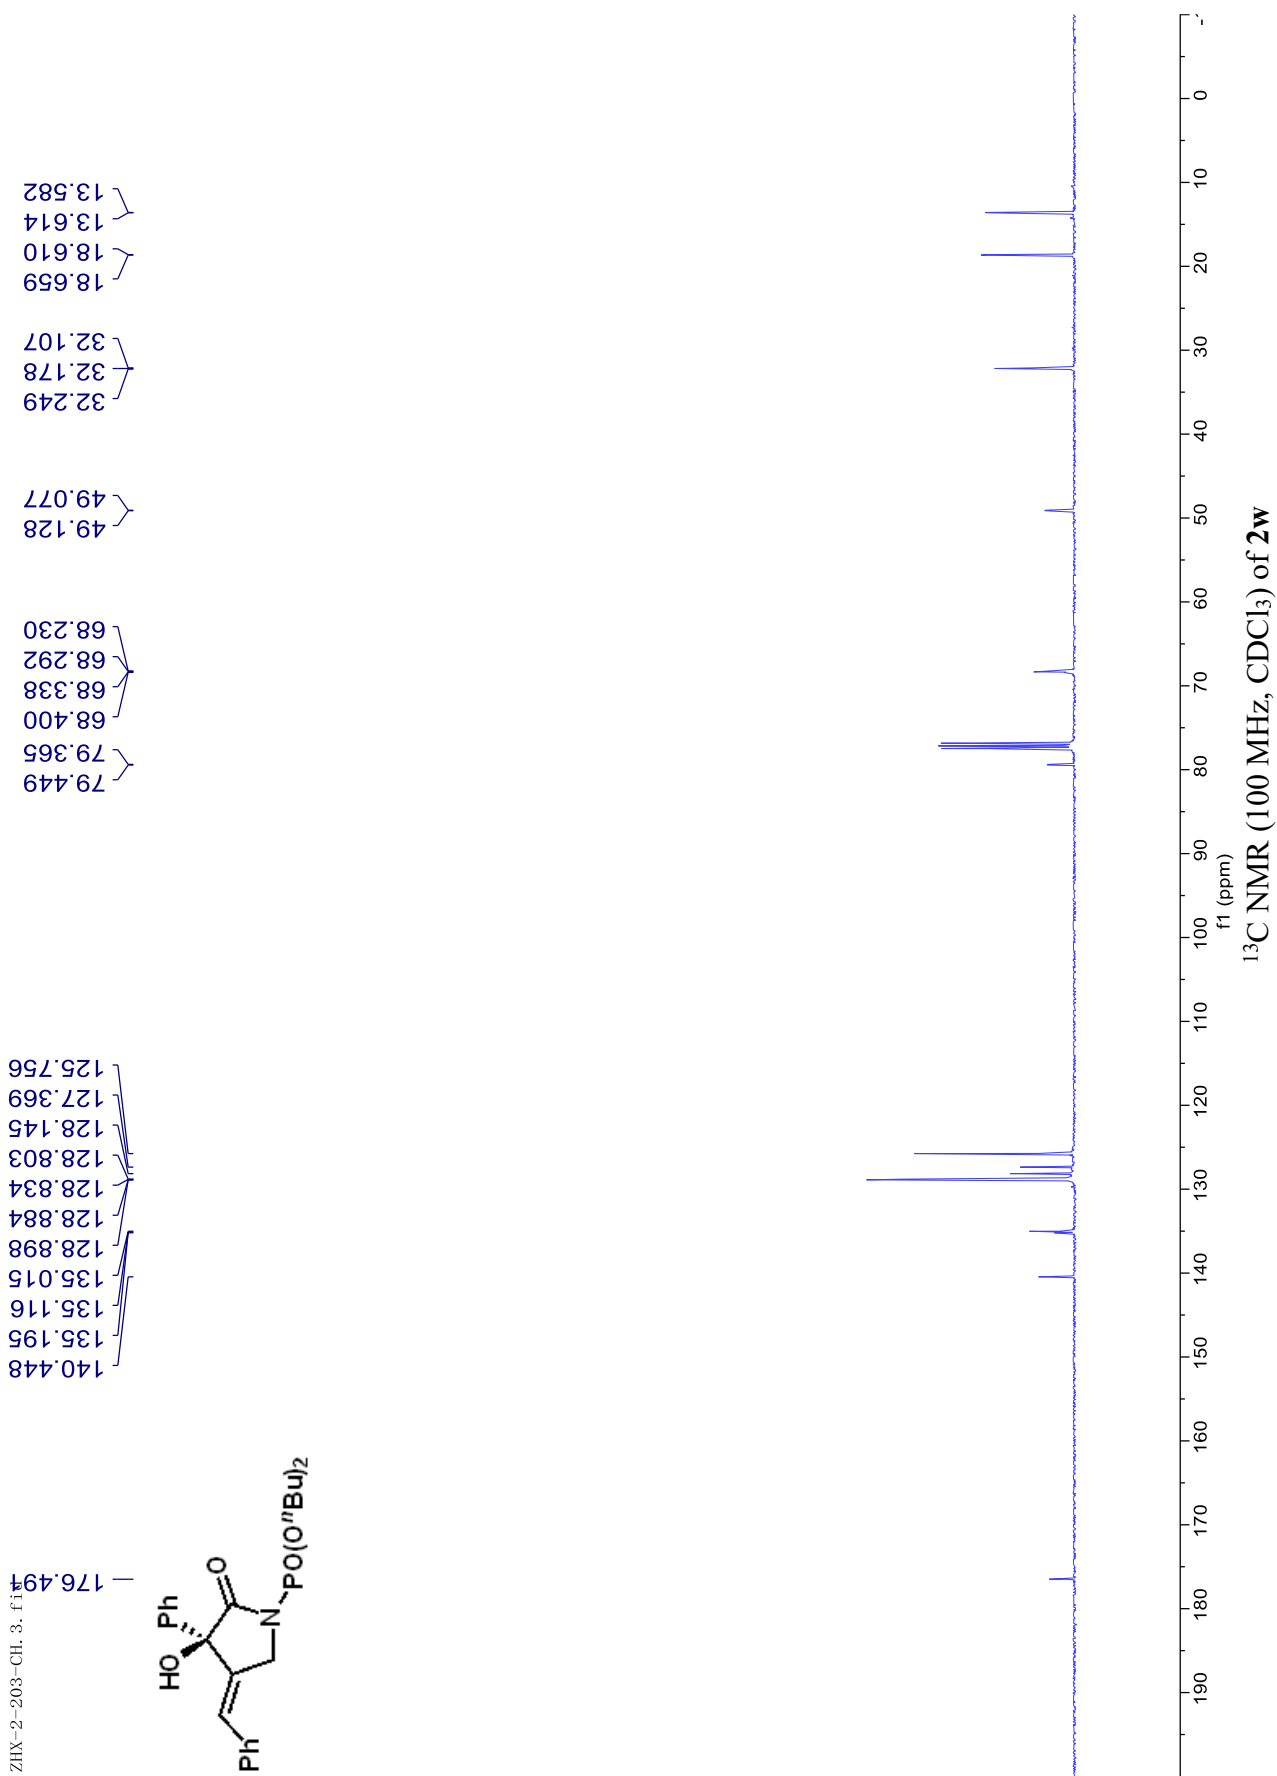



ZHX-2-203-31P. 1. fid

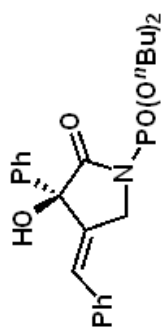

-3.482

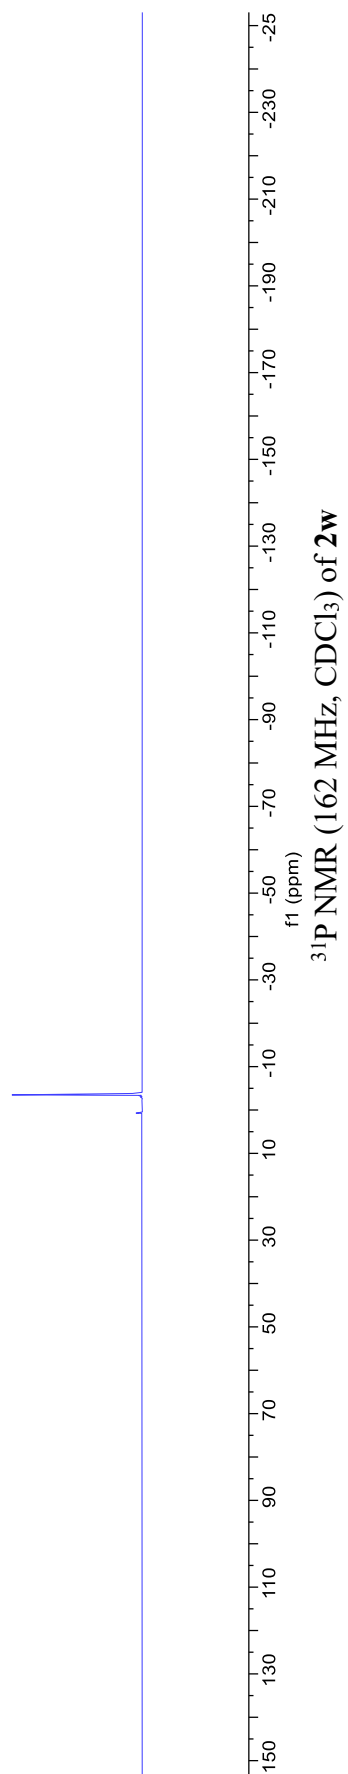



ZXW-VIII-54-2-RE. 2. f1d

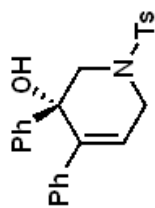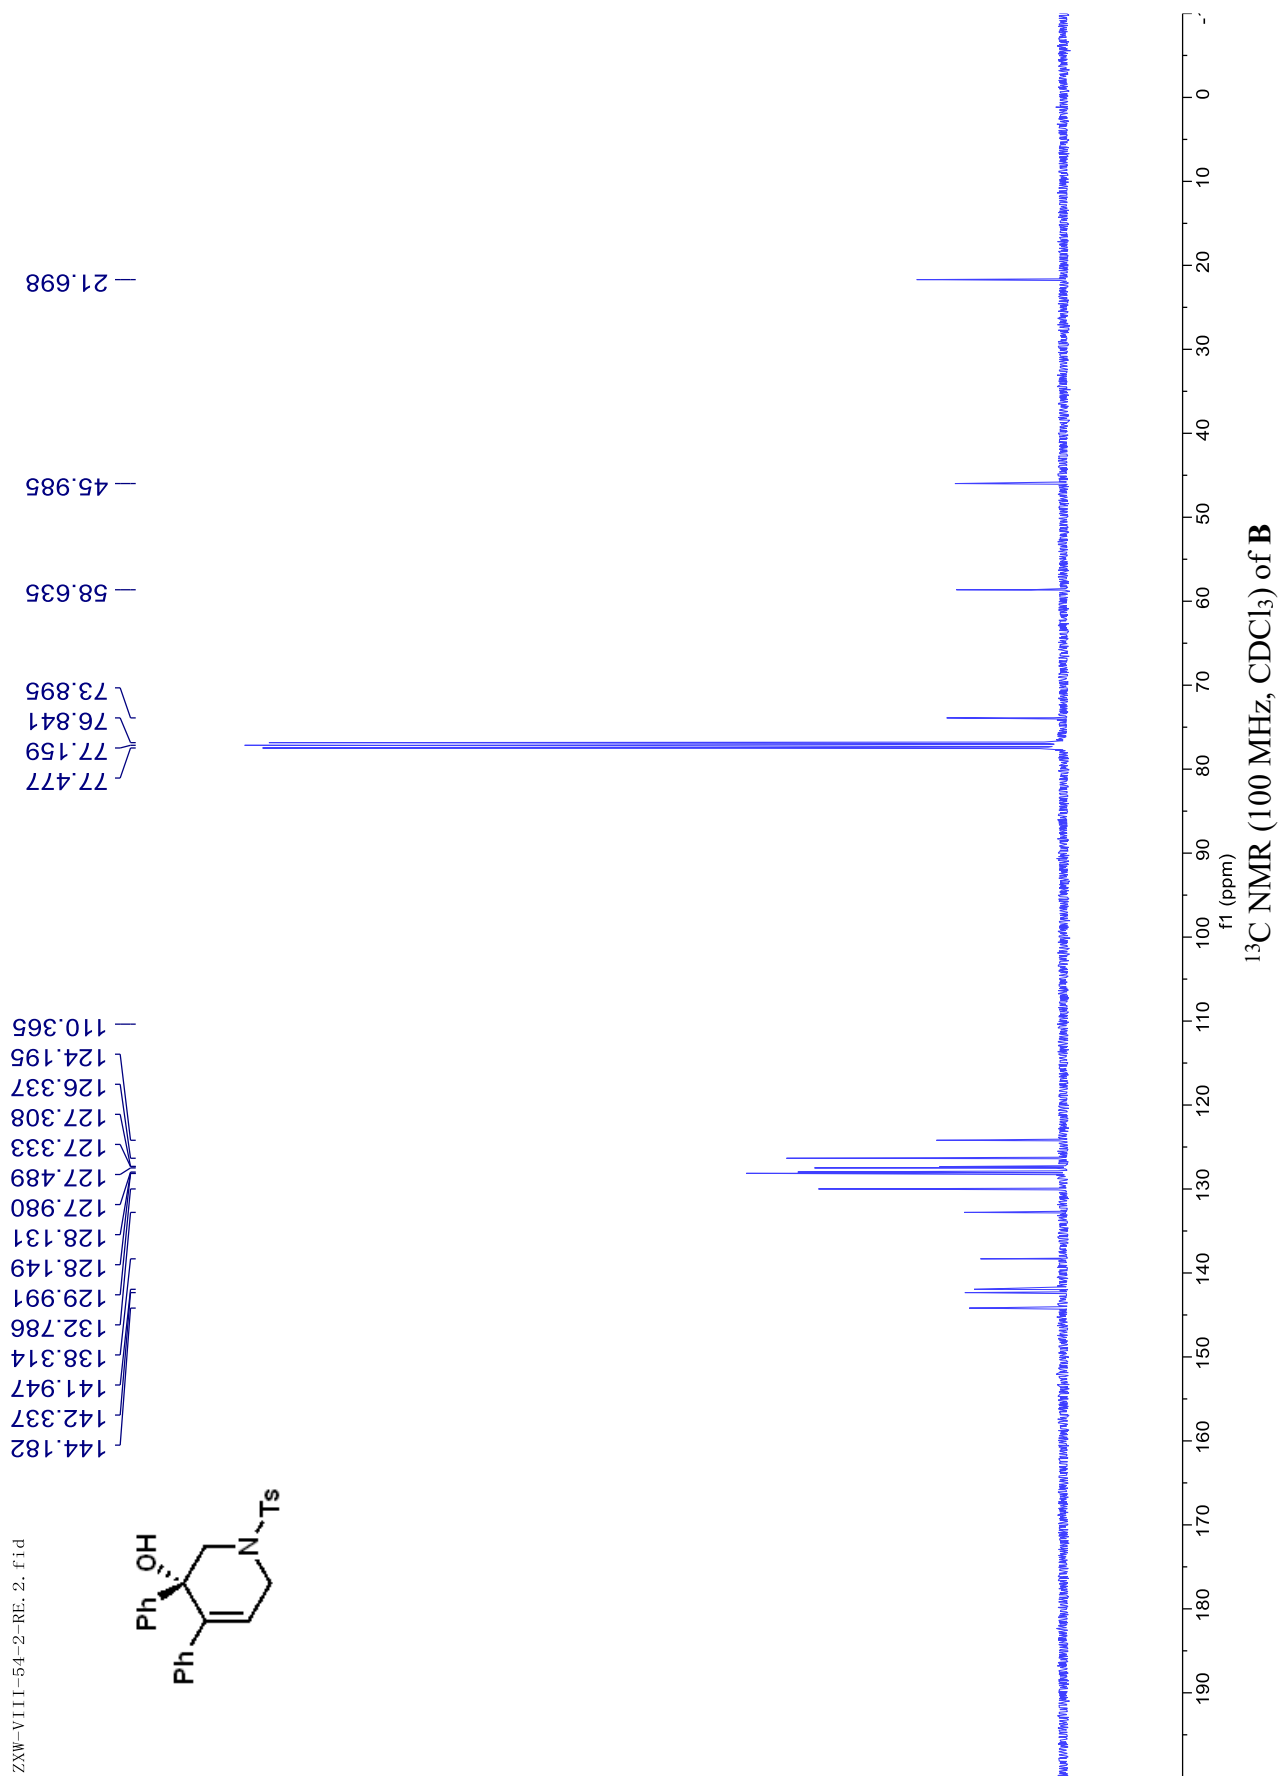



ZHX-3-44-RE-20230414\_2.f1d

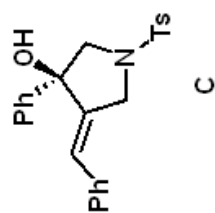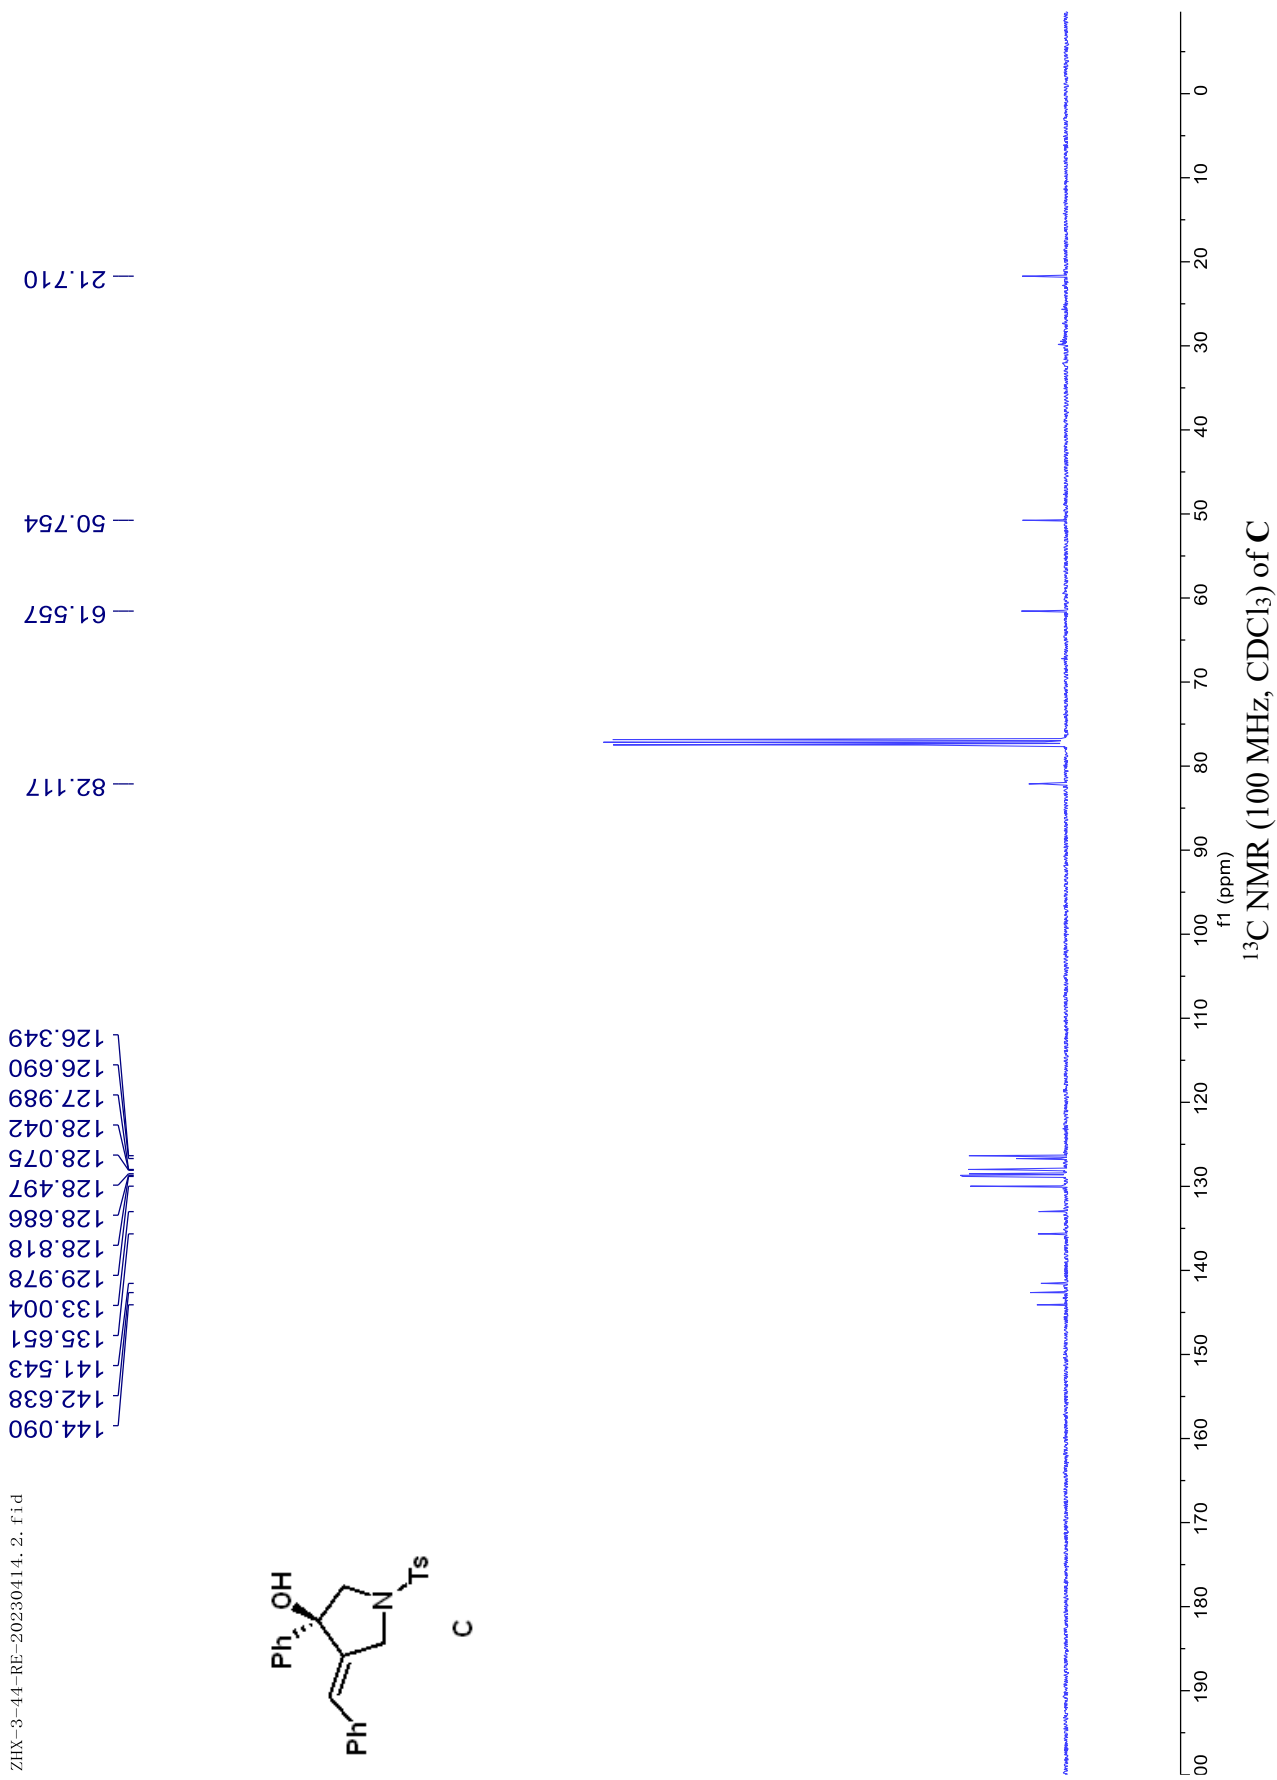

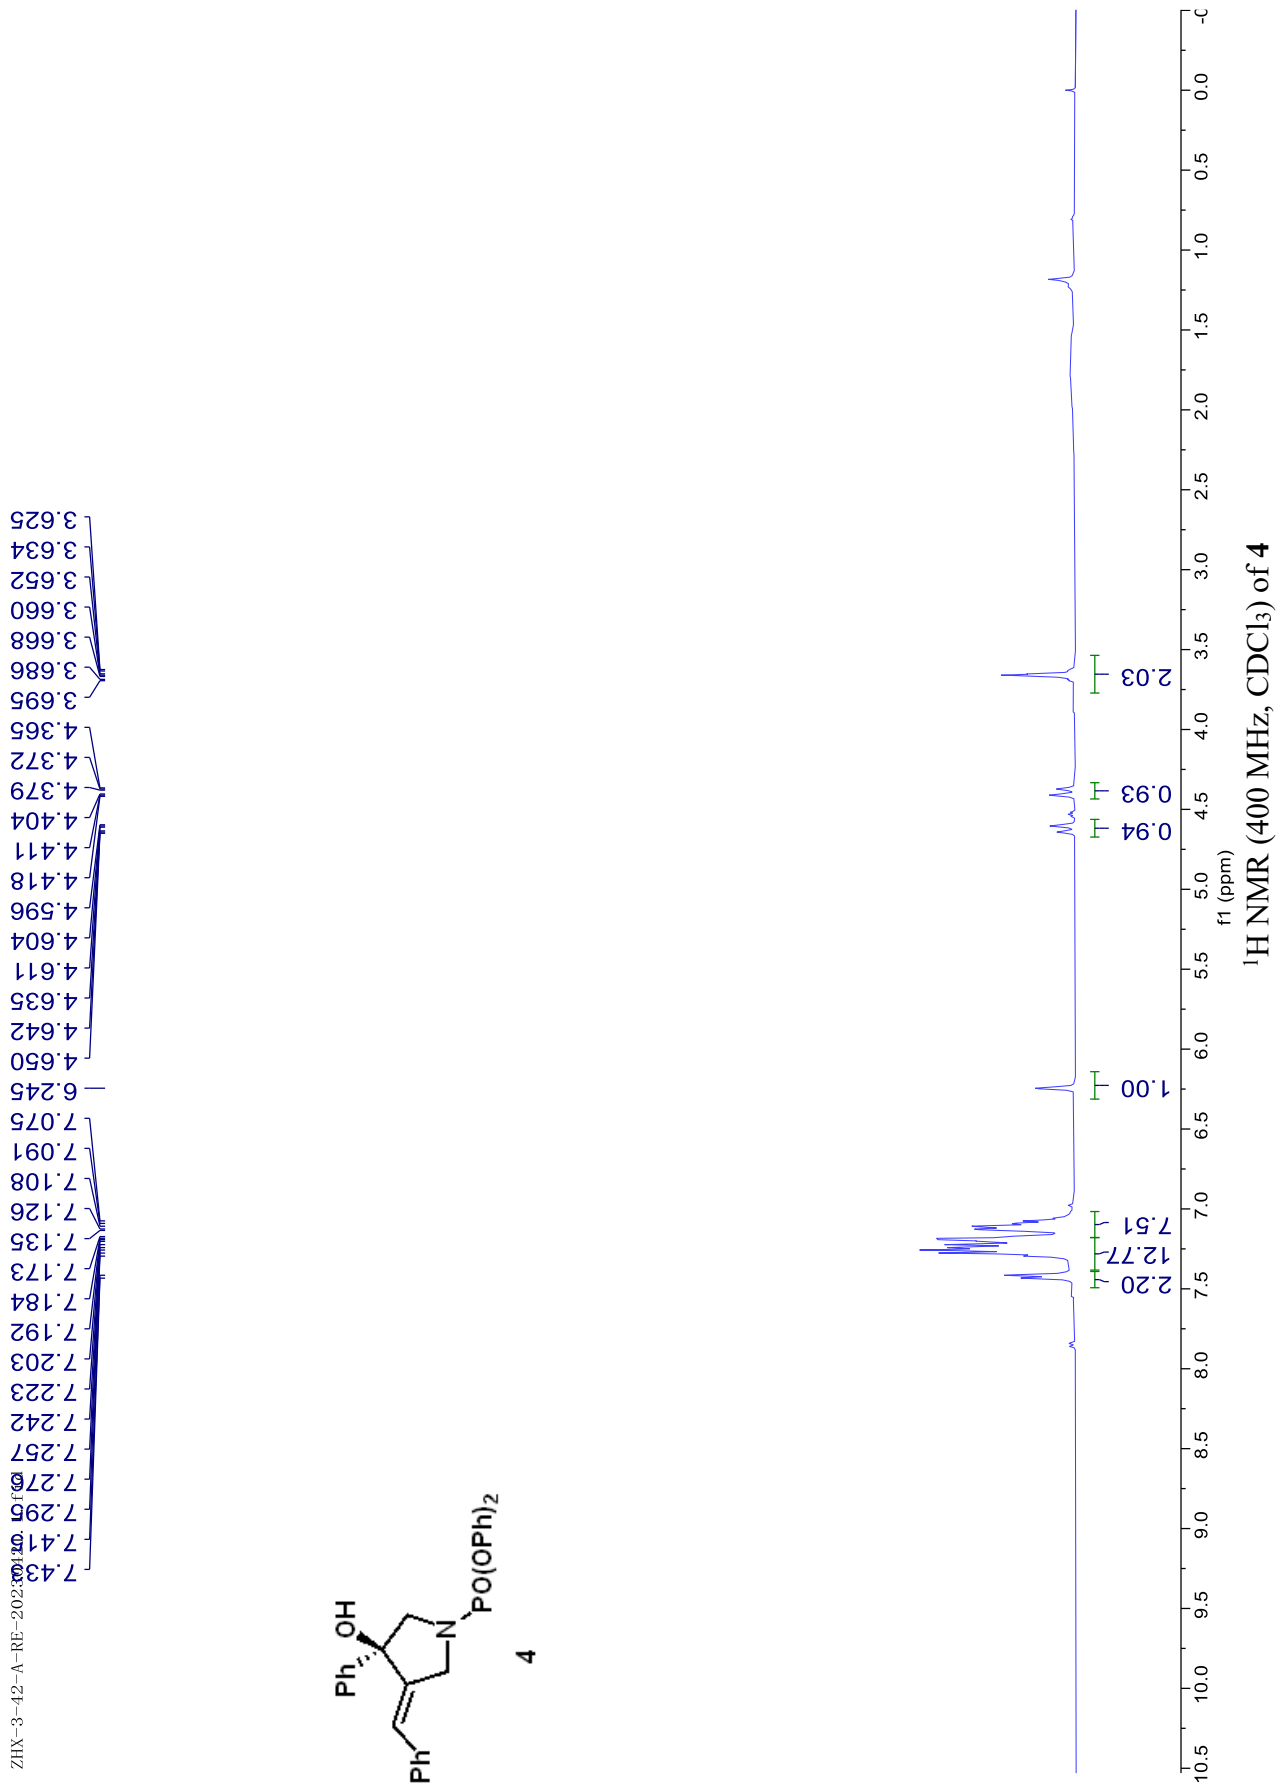

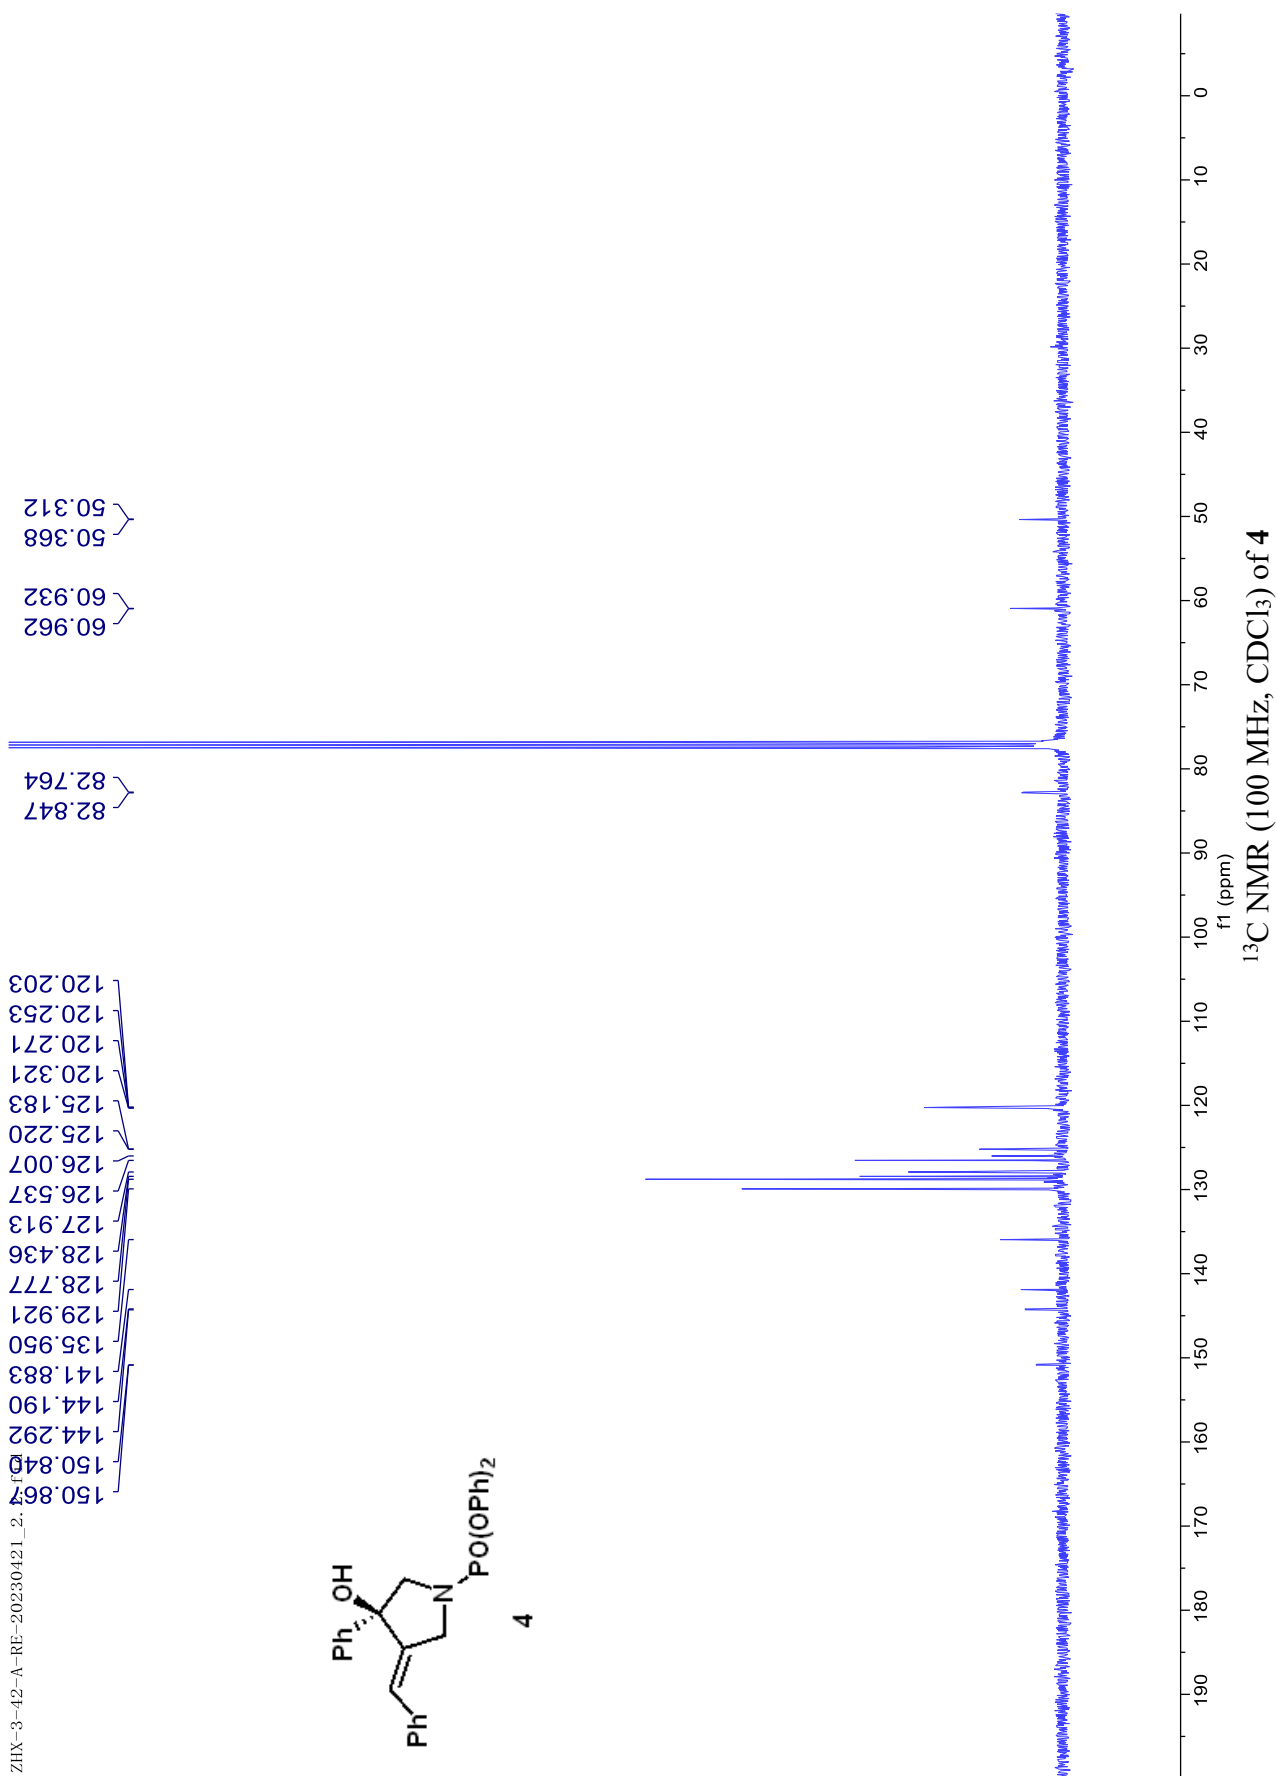

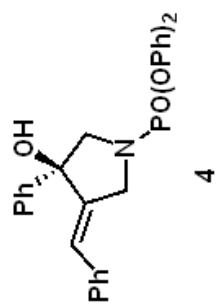

— -3.434

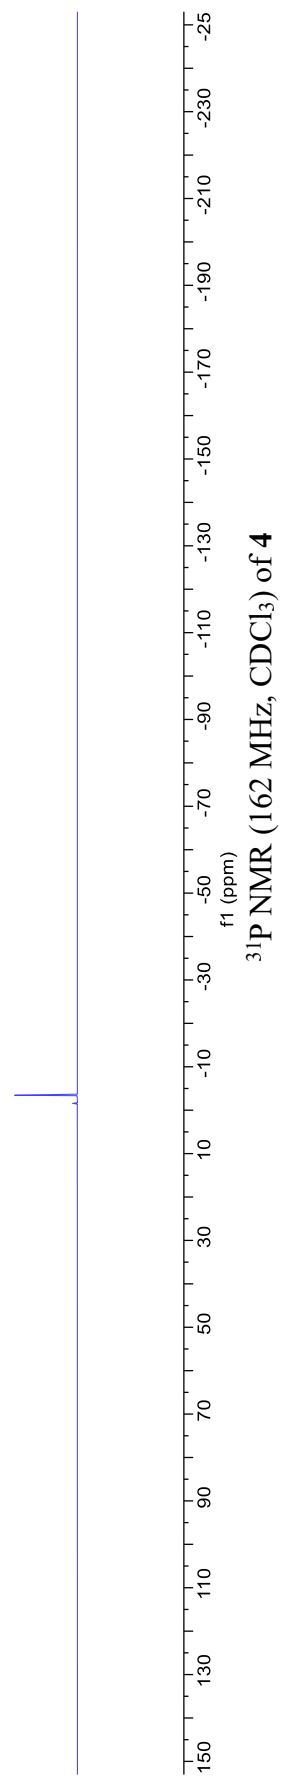





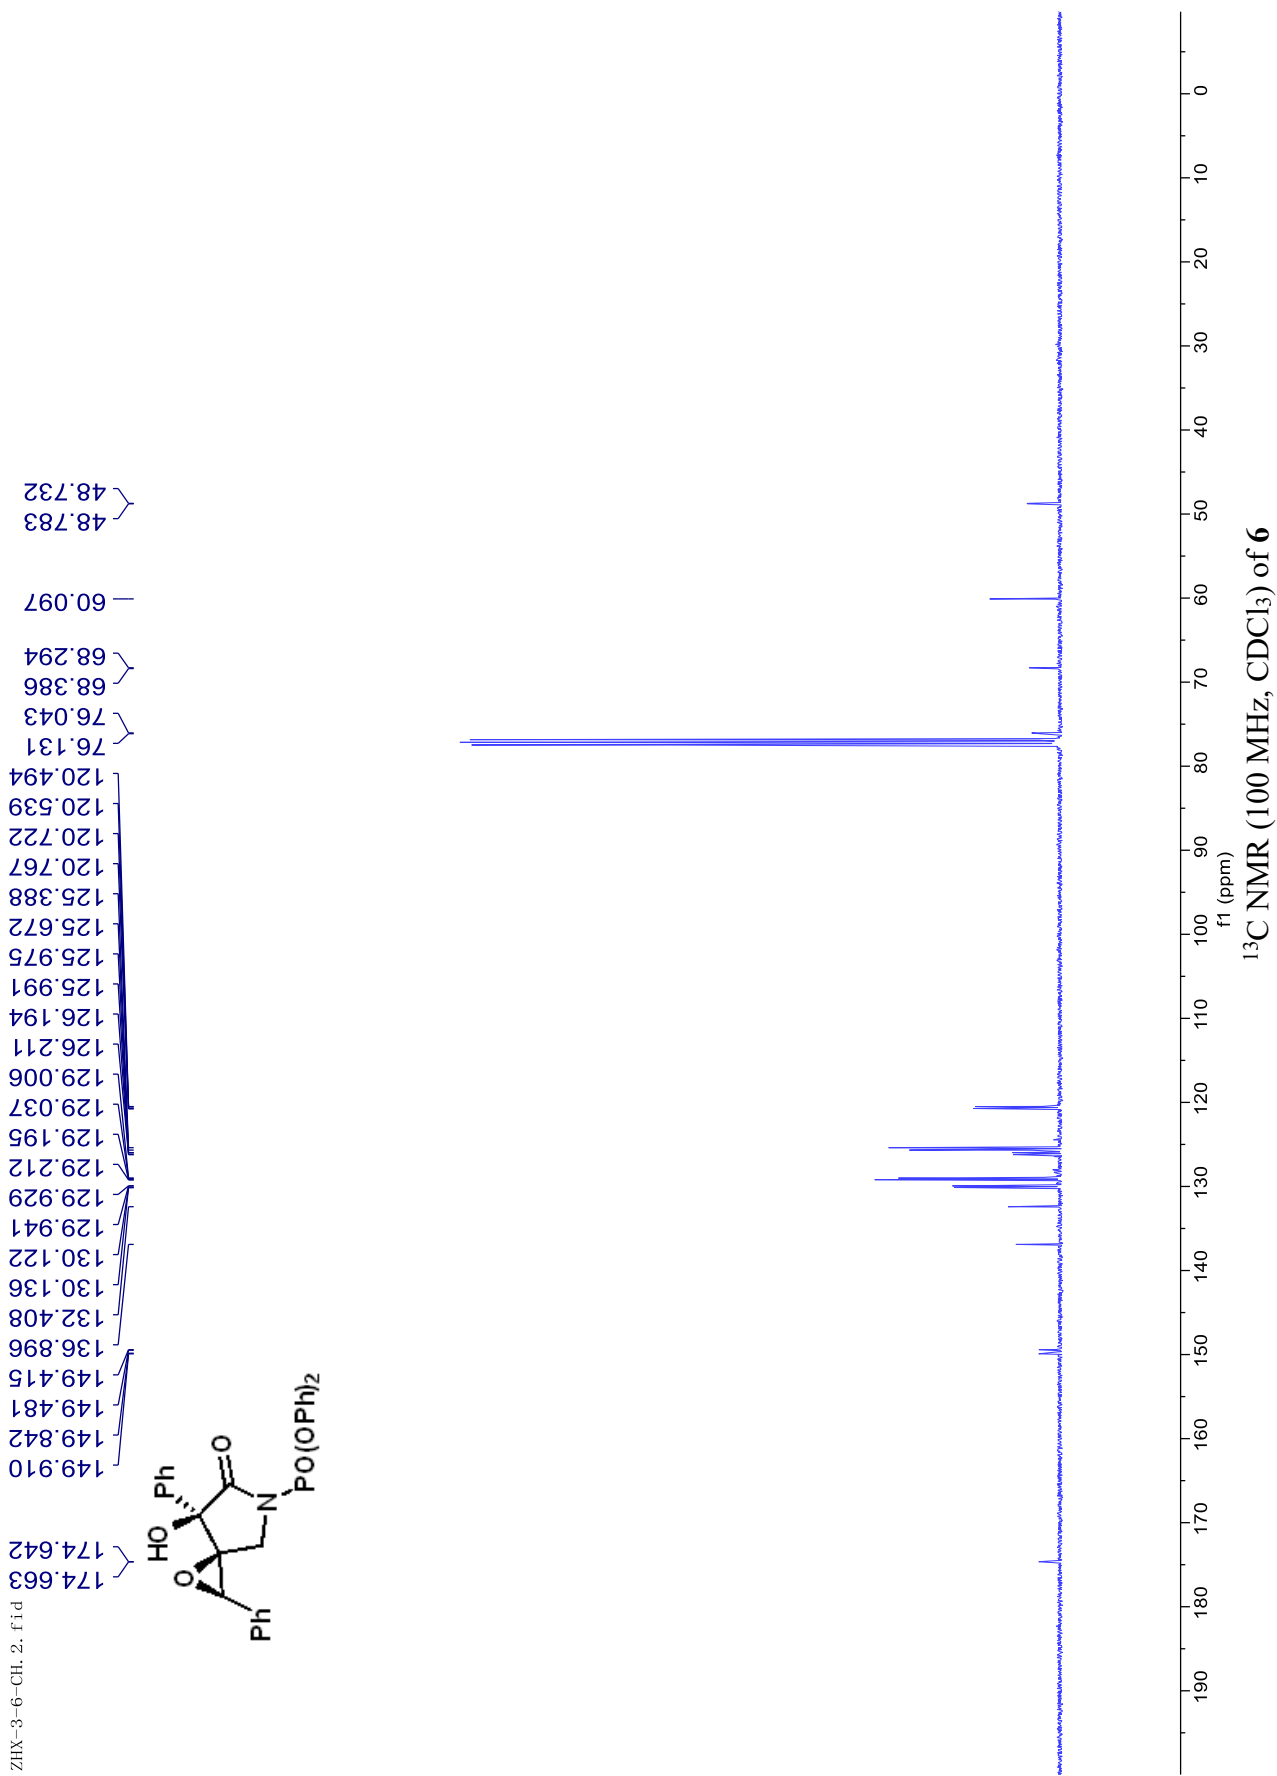

ZHX-3-6. 1. fid

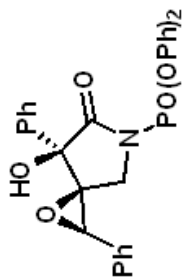

— -12.626

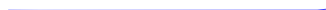

<sup>31</sup>P NMR (162 MHz, CDCl<sub>3</sub>) of **6**

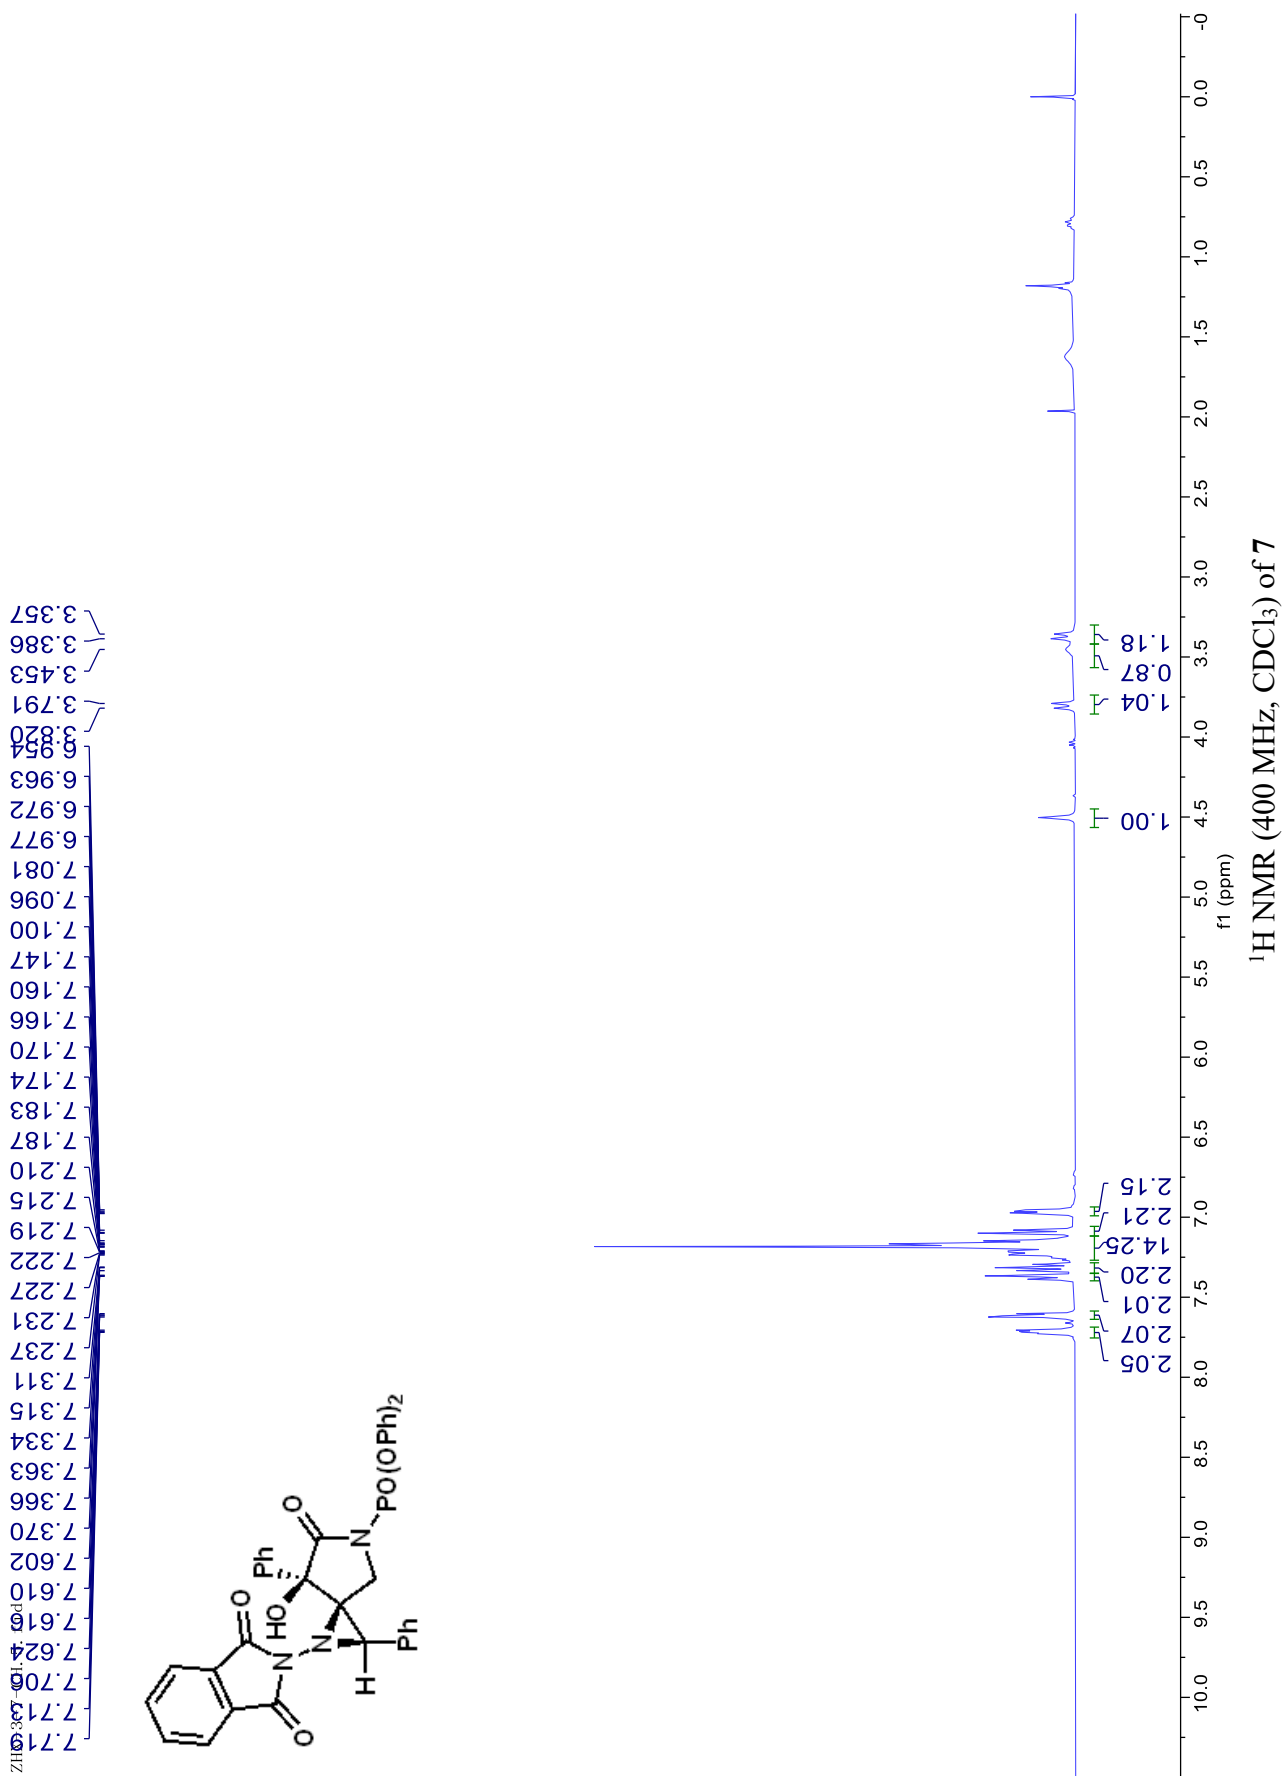

ZHX-3-7-CH. 6. f1.d

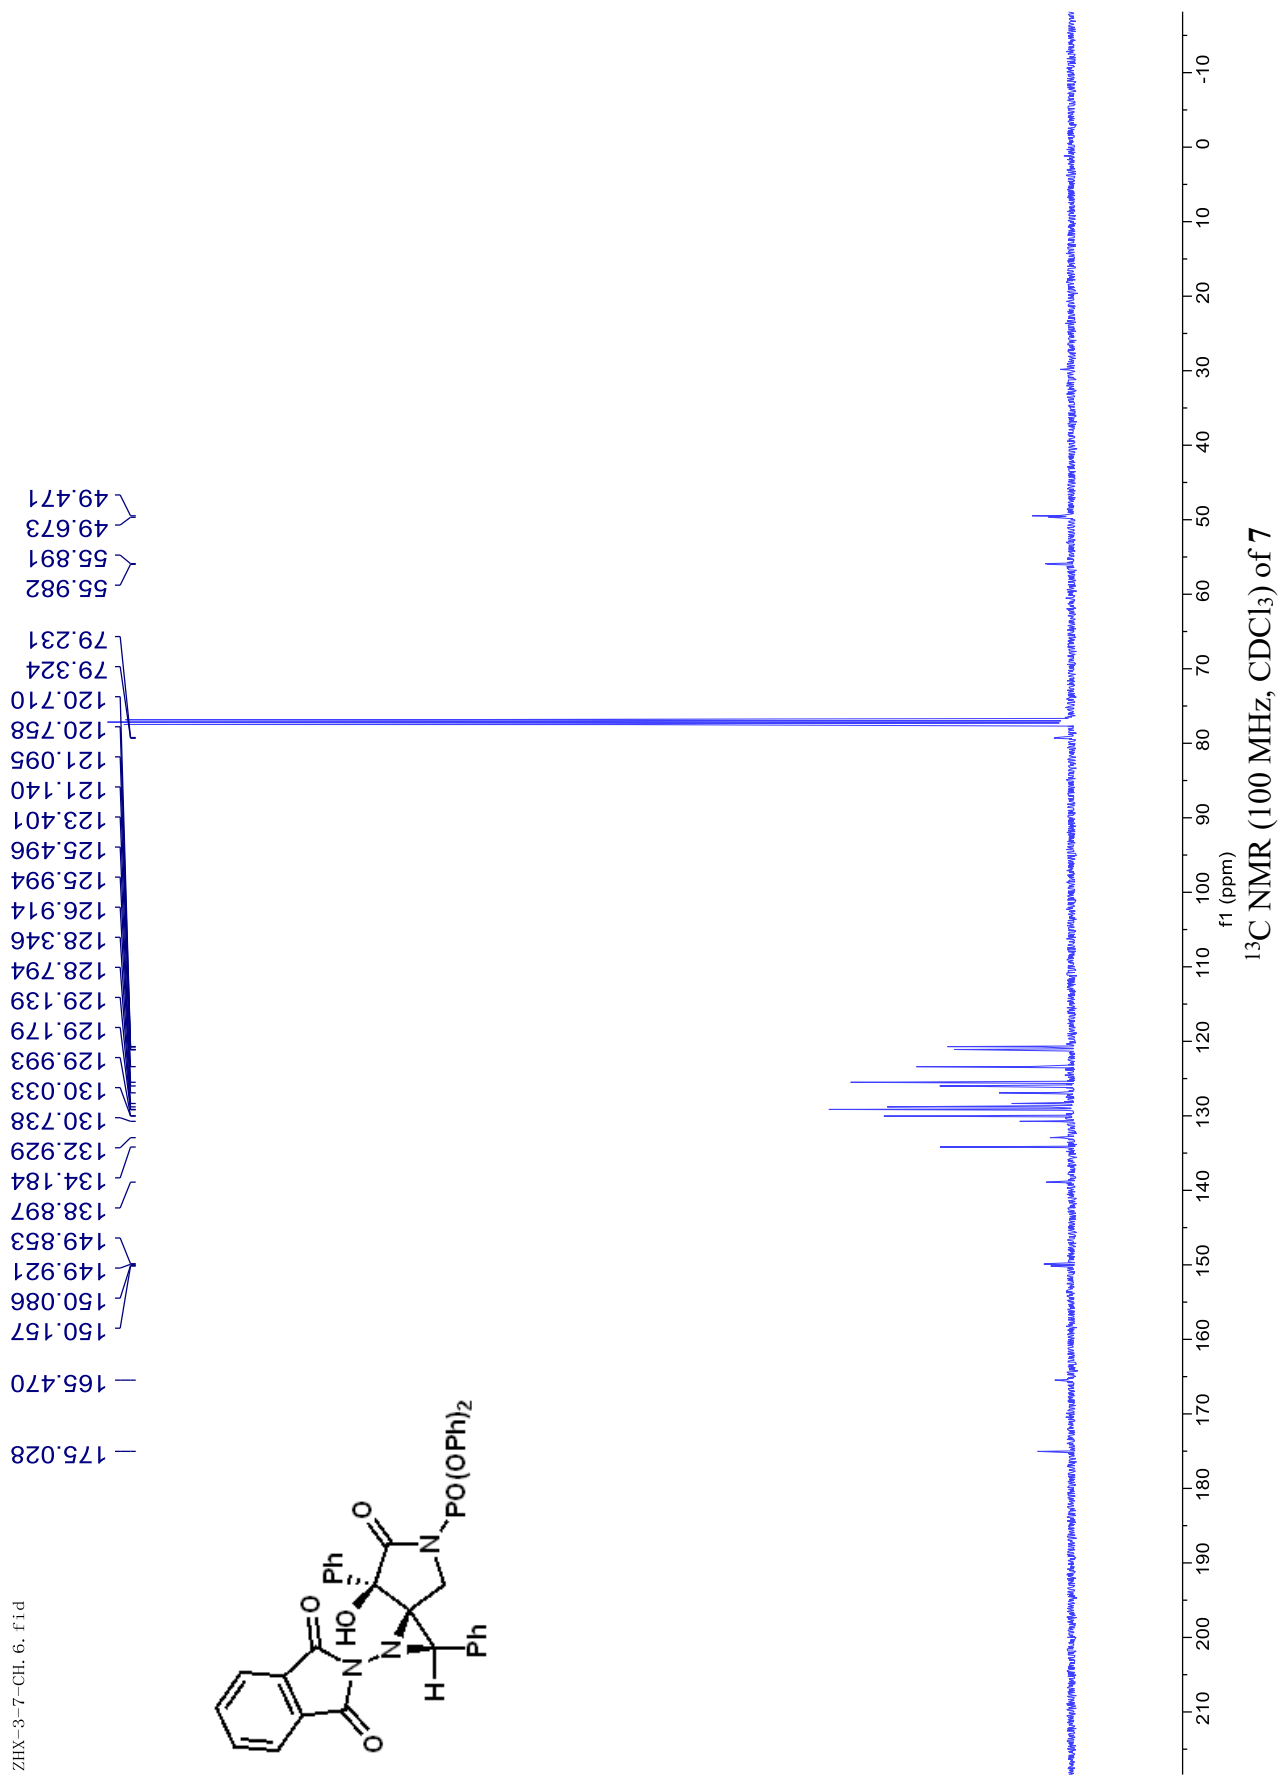

ZHX-3-7-RE-20230323. 2. fid

-12.870

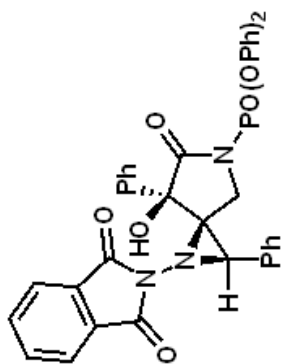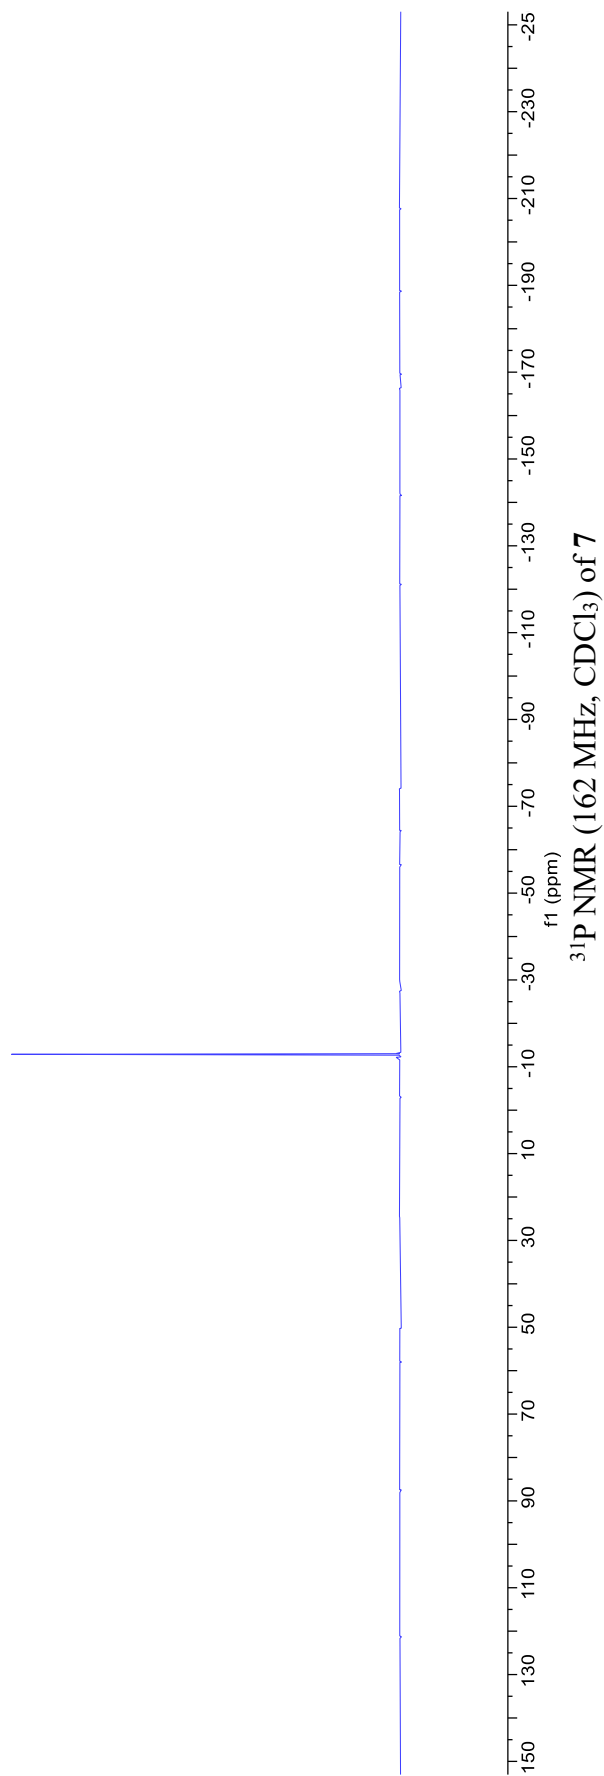

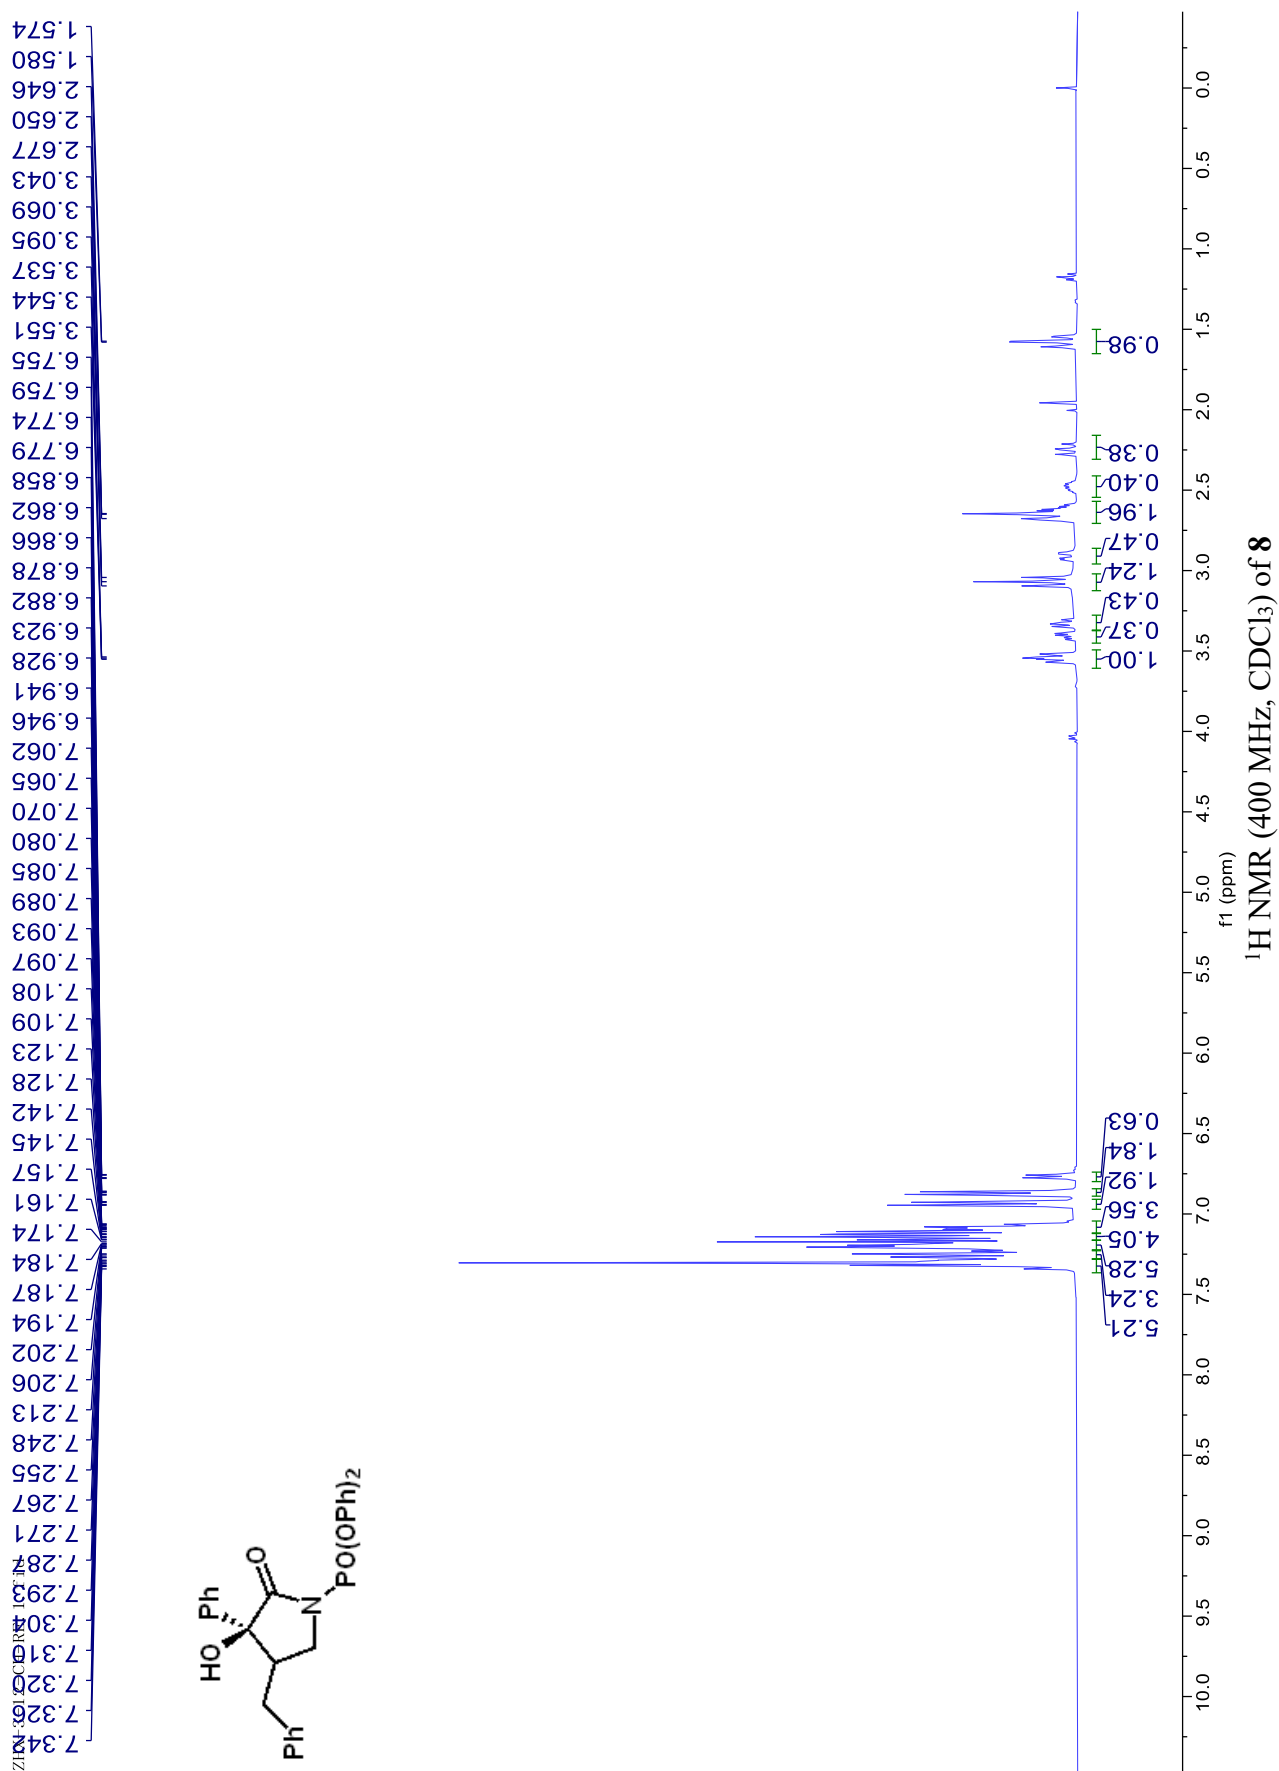

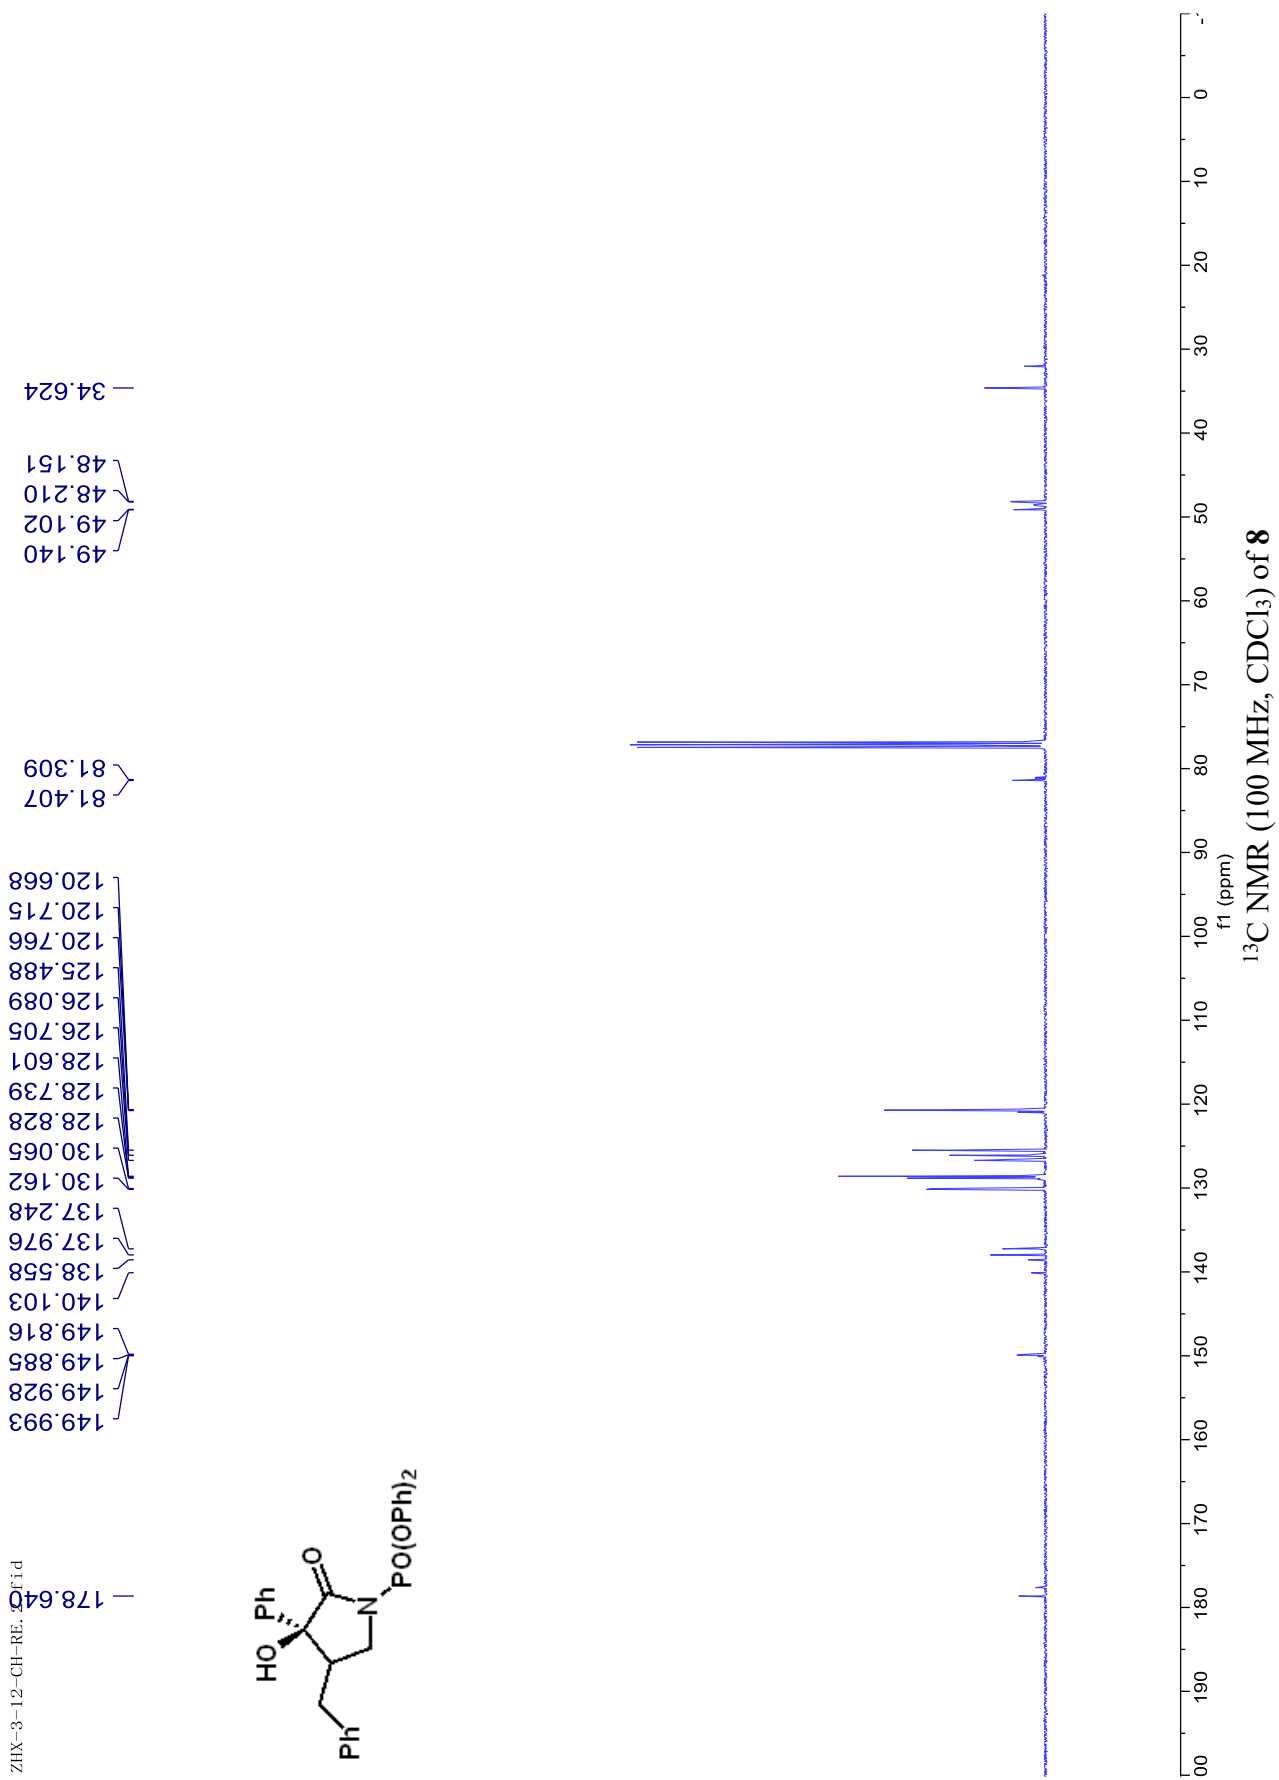



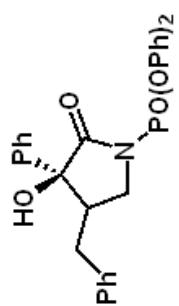

--12.284

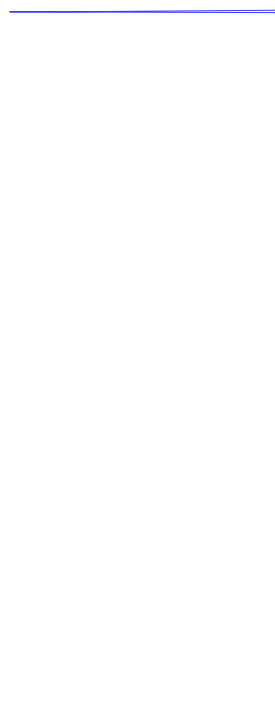

150 130 110 90 70 50 30 10 -10 -30 -50 -70 -90 -110 -130 -150 -170 -190 -210 -230 -25

<sup>31</sup>P NMR (162 MHz, CDCl<sub>3</sub>) of **8**

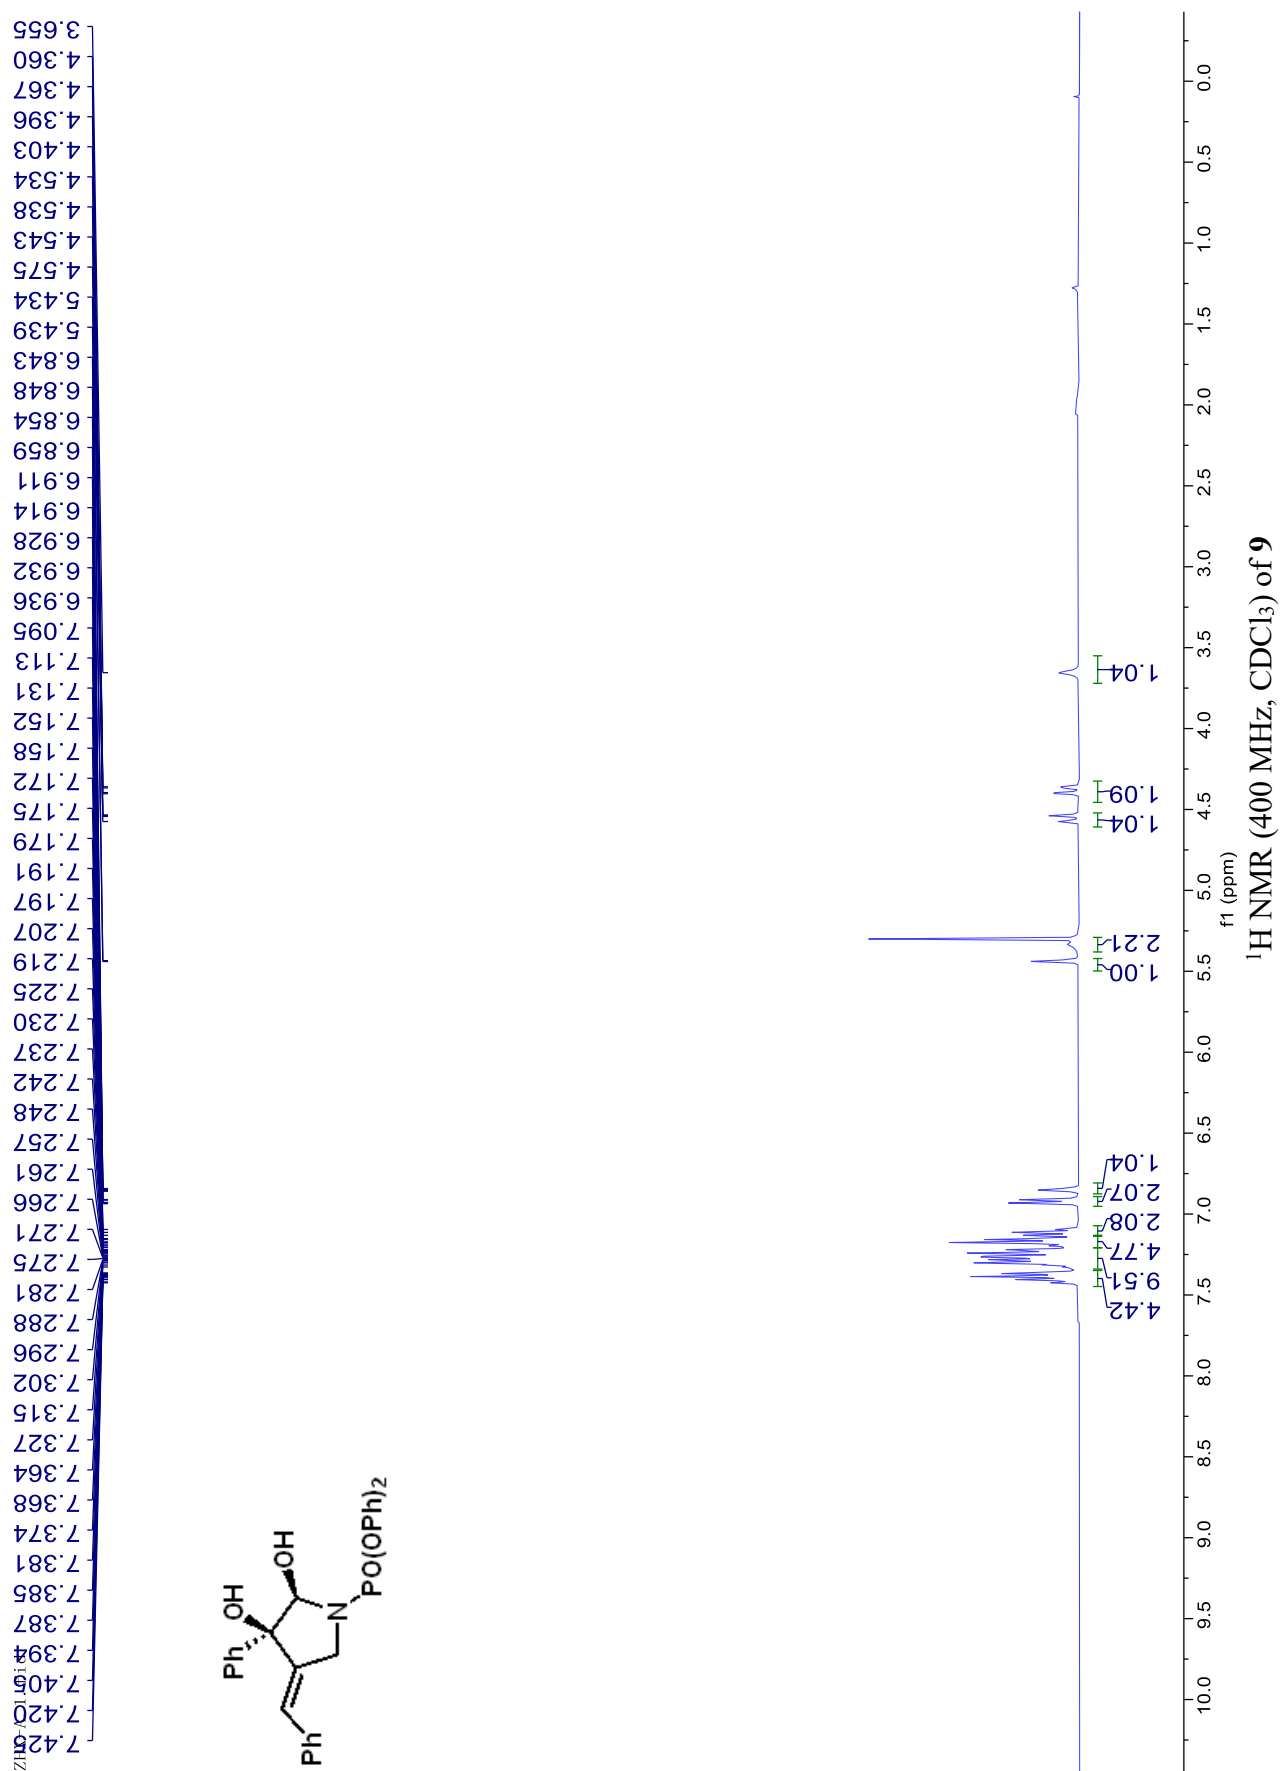

ZHX-3-8-RE-20230420. 2. fid

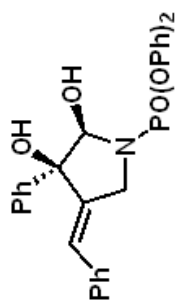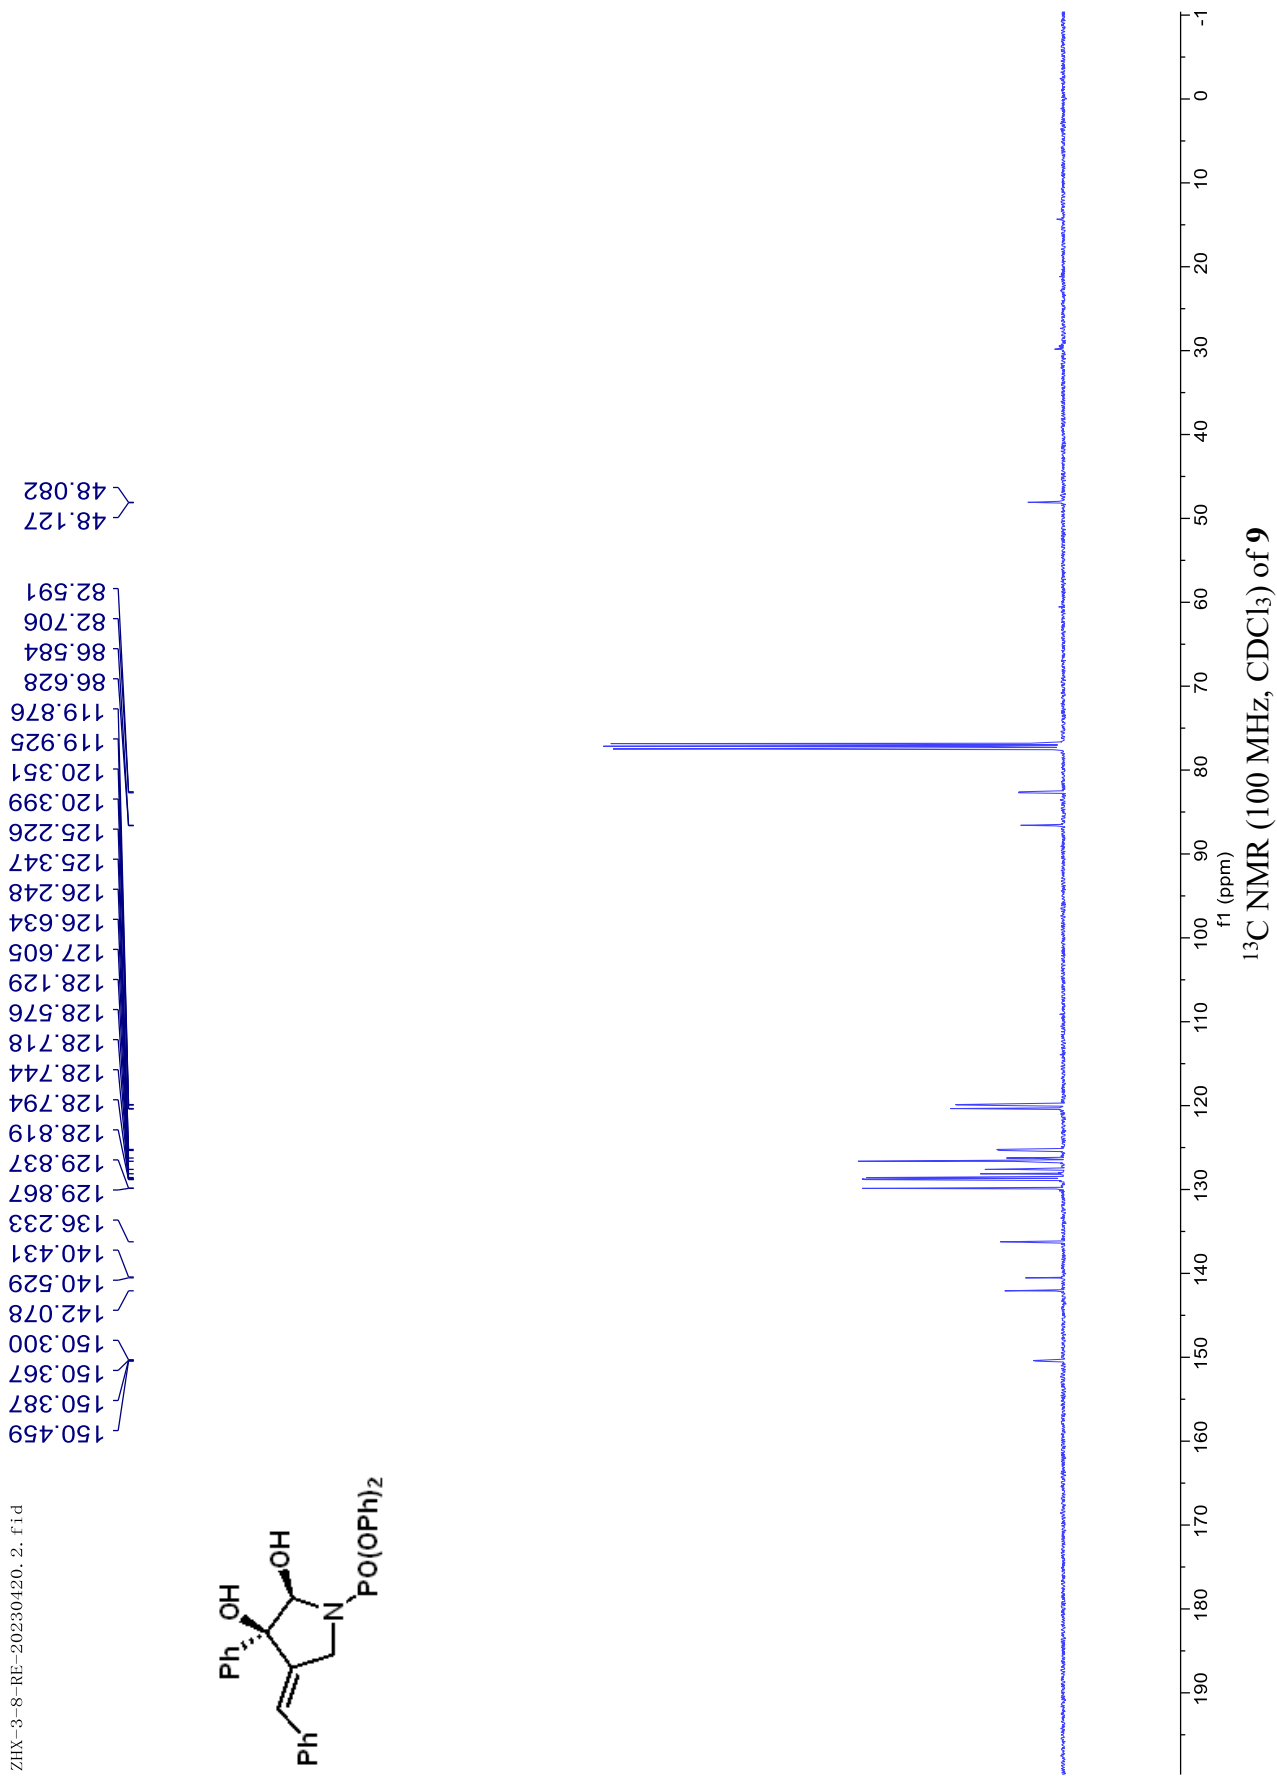

ZHX-3-8-RE-20230420\_3\_fid

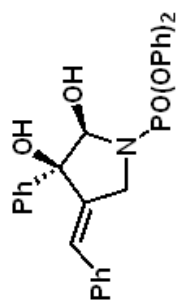

-4.500

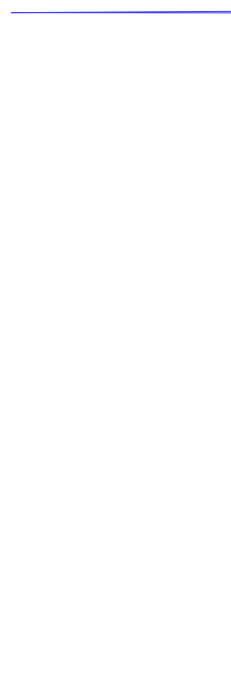

<sup>31</sup>P NMR (162 MHz, CDCl<sub>3</sub>) of **9**
